# Supplementary material
Source: PubMed Central journal article supplement (PMC6743222)

## Total Synthesis and Anti-Cancer Activity of All Known Communesin Alkaloids and Related Derivatives

Matthew M. Pompeo<sup>†</sup>, Jaime H. Cheah,<sup>‡</sup> and Mohammad Movassaghi<sup>\*†</sup>

<sup>†</sup>*Department of Chemistry, Massachusetts Institute of Technology, Cambridge, Massachusetts 02139*

<sup>‡</sup>*The Koch Institute for Integrative Cancer Research, Massachusetts Institute of Technology,  
500 Main Street, Cambridge, Massachusetts 02139*

### Supporting Information

|                                                                   |     |
|-------------------------------------------------------------------|-----|
| General Procedures                                                | S3  |
| Materials                                                         | S3  |
| Instrumentation                                                   | S3  |
| Positional Numbering System                                       | S4  |
| Cell Culture Information                                          | S5  |
| Cell Viability Assays                                             | S5  |
| Sulfonyl Fluoride <b>S1</b>                                       | S6  |
| Tryptamine <b>S2</b>                                              | S7  |
| Bromocyclotryptamine (+)- <b>25</b>                               | S8  |
| Sulfamate Ester (+)- <b>24</b>                                    | S9  |
| (-)-(S)-2-(Trimethylsilyl)ethanesulfinamide ( <b>26</b> )         | S11 |
| Alkanesulfinyl Imine (+)- <b>27</b>                               | S13 |
| Allyl Oxindole (+)- <b>28</b>                                     | S14 |
| Alcohol (+)- <b>29</b>                                            | S15 |
| Amino Alcohol (-)- <b>S5</b>                                      | S16 |
| Carbamate (+)- <b>30</b>                                          | S17 |
| Allylic Alcohol (-)- <b>31</b>                                    | S18 |
| Tricyclic Oxindole (-)- <b>32</b>                                 | S20 |
| (10R)-Tricyclic Epoxide (-)- <b>33</b>                            | S22 |
| (10S)-Tricyclic Epoxide (-)- <b>34</b>                            | S23 |
| (10R)-Tetracyclic Amine (-)- <b>35</b>                            | S24 |
| (10S)-Tetracyclic Amine (-)- <b>36</b>                            | S25 |
| Aminonitrile (+)- <b>37</b>                                       | S27 |
| Azepane (+)- <b>S6</b>                                            | S29 |
| Benzylic Aminonitrile (+)- <b>38</b>                              | S30 |
| Benzylic Amine (-)- <b>23</b>                                     | S31 |
| Sulfamide (-)- <b>39</b>                                          | S32 |
| Aminonitrile Sulfamide (+)- <b>40</b>                             | S33 |
| Heterodimer (+)- <b>41</b>                                        | S35 |
| Heterodimeric Diamine (+)- <b>19</b>                              | S37 |
| (-)-N8'-(Trimethylsilyl)ethanesulfonyl Communesin A ( <b>42</b> ) | S38 |
| (-)-Communesin A ( <b>2</b> )                                     | S40 |
| NMR Comparison Tables for (-)-Communesin A ( <b>2</b> )           | S42 |
| Heptacyclic Formamide (-)- <b>43</b>                              | S45 |
| (-)-Communesin E ( <b>3</b> )                                     | S47 |
| NMR Comparison Tables for (-)-Communesin E ( <b>3</b> )           | S49 |

|                                                                                                        |             |
|--------------------------------------------------------------------------------------------------------|-------------|
| <b>(+)-N8-Formyl Communesin E (44)</b>                                                                 | <b>S51</b>  |
| <b>(-)-N8'-(Trimethylsilyl)ethanesulfonyl Communesin B (45)</b>                                        | <b>S53</b>  |
| <b>(-)-Communesin B (4)</b>                                                                            | <b>S55</b>  |
| <b>NMR Comparison Tables for (-)-Communesin B (4)</b>                                                  | <b>S57</b>  |
| <b>(+)-N8'-(Trimethylsilyl)ethanesulfonyl Communesin D (46)</b>                                        | <b>S60</b>  |
| <b>(-)-Communesin C (5)</b>                                                                            | <b>S62</b>  |
| <b>NMR Comparison Table for (-)-Communesin C (5)</b>                                                   | <b>S64</b>  |
| <b>(+)-Communesin D (6)</b>                                                                            | <b>S65</b>  |
| <b>NMR Comparison Tables for (+)-Communesin D (6)</b>                                                  | <b>S67</b>  |
| <b>(-)-N8'-(Trimethylsilyl)ethanesulfonyl Communesin G (47)</b>                                        | <b>S69</b>  |
| <b>(-)-Communesin G (7)</b>                                                                            | <b>S71</b>  |
| <b>NMR Comparison Tables for (-)-Communesin G (7)</b>                                                  | <b>S73</b>  |
| <b>(-)-N8'-(Trimethylsilyl)ethanesulfonyl Communesin H (48)</b>                                        | <b>S75</b>  |
| <b>(-)-Communesin H (8)</b>                                                                            | <b>S77</b>  |
| <b>NMR Comparison Tables for (-)-Communesin H (8)</b>                                                  | <b>S79</b>  |
| <b>Aldol Adducts (+)-49 and (+)-51</b>                                                                 | <b>S81</b>  |
| <b>(-)-(3R)-Hydroxyhexanoic Acid (S9)</b>                                                              | <b>S83</b>  |
| <b>(+)-(3S)-Hydroxyhexanoic Acid (S9)</b>                                                              | <b>S83</b>  |
| <b>(-)-N8'-(Trimethylsilyl)ethanesulfonyl (C3"S)-Communesin I (50)</b>                                 | <b>S84</b>  |
| <b>(-)-(C3"S)-Communesin I (9)</b>                                                                     | <b>S86</b>  |
| <b>(-)-N8'-(Trimethylsilyl)ethanesulfonyl Communesin I (52)</b>                                        | <b>S88</b>  |
| <b>(-)-Communesin I (10)</b>                                                                           | <b>S90</b>  |
| <b>NMR Comparison Tables for (-)-Communesin I (10)</b>                                                 | <b>S92</b>  |
| <b>Tryptamine S10</b>                                                                                  | <b>S94</b>  |
| <b>Bromocyclotryptamine (+)-S11</b>                                                                    | <b>S95</b>  |
| <b>Sulfamate Ester (+)-53</b>                                                                          | <b>S96</b>  |
| <b>Sulfamide (+)-54</b>                                                                                | <b>S98</b>  |
| <b>Heterodimer (+)-56</b>                                                                              | <b>S100</b> |
| <b>(+)-N1'-(Trimethylsilyl)ethanesulfonyl <i>iso</i>-Communesin (59)</b>                               | <b>S102</b> |
| <b>In Situ <sup>1</sup>H NMR Monitoring of the Conversion of Diamine (+)-19 to the communesin core</b> | <b>S104</b> |
| <b>In Situ <sup>1</sup>H NMR Monitoring of the Conversion of Diamine 57 to Heptacycle (+)-59</b>       | <b>S105</b> |
| <b>X-Ray Diffraction Data for (10S)-Tetracyclic Amine (-)-36</b>                                       | <b>S106</b> |
| <b>X-Ray Diffraction Data for (-)-N8'-(Trimethylsilyl)ethanesulfonyl Communesin A (42)</b>             | <b>S117</b> |
| <b>X-Ray Diffraction Data for (-)-N8'-(Trimethylsilyl)ethanesulfonyl Communesin B (45)</b>             | <b>S125</b> |
| <b>Copy of <sup>1</sup>H, <sup>13</sup>C, and <sup>19</sup>F NMR spectra, and HPLC traces</b>          | <b>S134</b> |

**General Procedures.** All reactions were performed in oven-dried or flame-dried round-bottom flasks fitted with rubber septa and were conducted under positive argon pressure using standard Schlenk techniques, unless noted otherwise. Cannulae or gas-tight syringes with stainless steel needles were used to transfer air- or moisture-sensitive liquids. Where necessary (so noted), solutions were degassed by sparging with argon for a minimum of 10 min. Flash column chromatography was performed as described by Still *et al.*<sup>1</sup> using granular silica gel (60-Å pore size, 40–63 µm, 4–6% H<sub>2</sub>O content, Zeochem). Analytical thin layer chromatography (TLC) was performed using glass plates pre-coated with 0.25 mm 230–400 mesh silica gel impregnated with a fluorescent indicator (254 nm). TLC plates were visualized by exposure to short wave ultraviolet light (254 nm) and irreversibly stained by treatment with an aqueous solution of ceric ammonium molybdate (CAM) or an aqueous solution of potassium permanganate (KMnO<sub>4</sub>) followed by heating (~ 1 min) on a hot plate (~250 °C). Organic solutions were concentrated at 30–35 °C on rotary evaporators capable of achieving a minimum pressure of ~10 Torr. Diazene photolysis was accomplished by irradiation in a Rayonet RMR-200 photochemical reactor (Southern New England Ultraviolet Company, Branford, CT, USA) equipped with 14 radially distributed (r = 12.7 cm) 25 W lamps.

**Materials.** Commercial reagents and solvents were used as received with the following exceptions: acetonitrile, dichloromethane, *N,N*-dimethylformamide, methanol, tetrahydrofuran, toluene, and triethylamine were purchased from EMD Millipore (ReCycler™) or Sigma-Aldrich (Pure-Pac™) and were purified by the method of Grubbs *et al.* under positive argon pressure.<sup>2</sup> Benzene, 1,2-dichloroethane, and *N,N*-diisopropylethylamine were dried by distillation over calcium hydride under an inert dinitrogen atmosphere. Deuterated solvents used for nuclear magnetic resonance (NMR) spectroscopy were purchased from Cambridge Isotope Laboratories, Inc. and were used as received with the exception of chloroform-*d*, which was stored over activated molecular sieves (Linde type 3Å, 1/16" pellets) and granular anhydrous potassium carbonate. Titanium(IV) ethoxide (containing 5–15% isopropanol) was purchased from Strem Chemicals Inc.; 2,6-di-*tert*-butyl-4-methylpyridine was purchased from Matrix Scientific and was further purified by flash column chromatography on silica gel (eluent: hexanes); (–)-diacetone-D-glucose was purchased from Chem-Impex International, Inc. and was further purified by flash chromatography on silica gel (eluent: 30% acetone in hexanes) or from Sigma-Aldrich and was used as received; hexafluoroisopropanol was purchased from Oakwood Products, Inc. and was stored under an argon atmosphere over activated 4 Å molecular sieves; tetra-*n*-butylammonium hydrogen sulfate, *tert*-butyl hypochlorite, and *N*-carbobenzoxy-2-nitrobenzenesulfonamide were purchased from TCI America; (*S*)-4-benzylthiazolidine-2-thione and tryptamine were purchased from AK Scientific, Inc.; calcium trifluoromethanesulfonate, cesium carbonate, lithium hydroxide monohydrate, thiophenol, and triphenylphosphine were purchased from Alfa Aesar. All other solvents and chemicals were purchased from Sigma-Aldrich.

**Instrumentation.** Nuclear magnetic resonance (<sup>1</sup>H, <sup>13</sup>C, and <sup>19</sup>F NMR) spectra were recorded with Bruker AVANCE NEO 600, Bruker AVANCE 600, Bruker AVANCE NEO 500, Varian inverse probe INOVA-500, Varian INOVA-500, JEOL ECZR 500, or Bruker AVANCE III 400 spectrometers and are reported in parts per million on the δ scale. Spectra were processed with

1. Still, W. C.; Kahn, M.; Mitra, A. *J. Org. Chem.* **1978**, *43*, 2923.

2. Pangborn, A. B.; Giardello, M. A.; Grubbs, R. H.; Rosen, R. K.; Timmers, F. *Organometallics* **1996**, *15*, 1518.

MestReNova 12.0.2 using the automatic phasing and third-order polynomial baseline correction capabilities. Splitting was determined using the automatic multiplet analysis function with manual intervention as necessary. Proton NMR spectra are referenced from the residual protium in the NMR solvent ( $\text{CHCl}_3$ :  $\delta$  7.26,  $\text{CD}_2\text{HClN}$ :  $\delta$  1.94,  $\text{CD}_2\text{HOD}$ :  $\delta$  3.31,  $\text{DMSO-}d_5$ : 2.50,  $\text{C}_6\text{D}_5\text{H}$ :  $\delta$  7.16).<sup>3</sup> Carbon-13 NMR spectra are referenced from the carbon resonances of the deuterated solvent ( $\text{CDCl}_3$ :  $\delta$  77.16,  $\text{CD}_3\text{CN}$ :  $\delta$  118.26,  $\text{CD}_3\text{OD}$ :  $\delta$  49.00,  $\text{DMSO-}d_6$ : 39.52,  $\text{C}_6\text{D}_6$ :  $\delta$  128.06).<sup>3</sup> Fluorine-19 NMR are referenced internally from the fluorine resonances of  $\alpha,\alpha,\alpha$ -trifluorotoluene ( $\text{CF}_3\text{C}_6\text{H}_5$   $\delta$  -63.72). Data are reported as follows: chemical shift (multiplicity [s = singlet, d = doublet, t = triplet, q = quartet, p = pentet, m = multiplet, br = broad, app = apparent], coupling constant(s) in Hertz, integration, assignment).

Infrared spectroscopic data were obtained with a Perkin-Elmer 2000 FTIR spectrometer or a Bruker ALPHA II FTIR spectrometer equipped with a diamond ATR sampling module and are reported as follows: frequency of absorption ( $\text{cm}^{-1}$ ) [intensity of absorption (s = strong, m = medium, w = weak, br = broad)]. Optical rotations were measured on a Jasco P-1010 polarimeter with a sodium lamp and are reported as follows:  $[\alpha]_{\lambda}^T$  ( $c = \text{g}/100 \text{ mL}$ , solvent). Chiral HPLC analysis was performed on an Agilent Technologies 1100 Series instrument equipped with a diode array detector and columns with chiral stationary phases from Daicel Chemical Industries (CHIRALPAK<sup>®</sup> IA, Lot# IA00CE-PD046 and CHIRALCEL<sup>®</sup> OD-H, Lot# ODH0CE-KF021). Single crystal X-ray diffraction was carried out at the X-ray crystallography laboratory of the Department of Chemistry, Massachusetts Institute of Technology, with the assistance of Mr. Kyan A. D'Angelo, Dr. Charlene Tsay, and Dr. Peter Müller. We thank Dr. Mohanraja Kumar, Dr. Li Li, and Mr. Liam P. Kelly at the Massachusetts Institute of Technology Department of Chemistry Instrumentation Facility for obtaining mass spectroscopic data. High-resolution mass spectra (HRMS) were recorded on a Bruker Daltonics APEXIV 4.7 Tesla FT-ICR-MS using an electrospray (ESI) ( $m/z$ ) ionization source or a direct analysis in real time (DART) ionization source, on an Agilent 6510 QToF with a Dual ESI spray ionization source, or on a JEOL AccuTOF LC-plus 4G API-HRTOFMS equipped with an an IonSense DART ionization source.

**Positional Numbering System.** In assigning the  $^1\text{H}$  and  $^{13}\text{C}$  NMR data of all intermediates en route to the communesin alkaloids, we have employed a uniform numbering system illustrated below for (-)-communesin B (**4**).

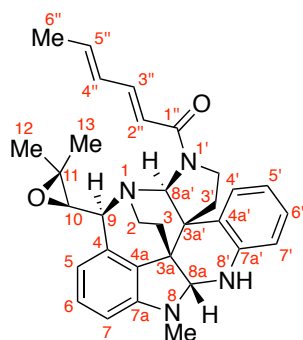

(-)-communesin B (**4**)

3. (a) Gottlieb, H. E.; Kotlyar, V.; Nudelman, A. *J. Org. Chem.* **1997**, *62*, 7512. (b) Fulmer, G. R.; Miller, A. J. M.; Sherden, N. H.; Gottlieb, H. E.; Nudelman, A.; Stoltz, B. M.; Bercaw, J. E.; Goldberg, K. I. *Organometallics* **2010**, *29*, 2176.

**Cell Culture Information.** Cells were grown in media supplemented with fetal bovine serum (FBS) and antibiotics (100 µg/mL penicillin and 100 U/mL streptomycin). Specifically, experiments were performed using the following cell lines and media compositions: HeLa (cervical adenocarcinoma) and A549 (lung carcinoma) were grown in RPMI-1640 + 10% FBS; HCT 116 (colorectal carcinoma) was grown in DMEM + 10% FBS; DU 145 (prostate carcinoma) and MCF7 (breast adenocarcinoma) was grown in EMEM + 10% FBS. Cells were incubated at 37 °C in a 5% CO<sub>2</sub>, 95% humidity atmosphere.

**Cell Viability Assays.** Cells were plated at 2000 cells/well into duplicate assay plates in 50 µL media into 384-well white, opaque, tissue-culture treated plates and allowed to adhere overnight at 37 °C/5% CO<sub>2</sub>. Compounds were solubilized in DMSO as 1000x stocks and 100 nL was pin-transferred to cells (V&P pin tool mounted on Tecan Freedom Evo MCA96). Compounds were tested in 10-pt, 2-fold dilution with concentrations tested between 1 nM – 20 µM for most compounds, except where indicated. DMSO (32 wells of 384-wells) was used as vehicle control. After 72 hours of incubation at 37 °C/5% CO<sub>2</sub>, 10 µL Cell Titer-Glo (Promega) was added to each well and plates were incubated at room temperature for 10 minutes before the luminescence was read on a Tecan M1000 plate reader. Cell Titer-Glo measures ATP levels of cells as a surrogate for cell viability. All compound-treated wells was normalized to the DMSO control averages and expressed as a % of DMSO viability. IC<sub>50</sub> values were determined from the dose curves using Spotfire (Perkin Elmer).

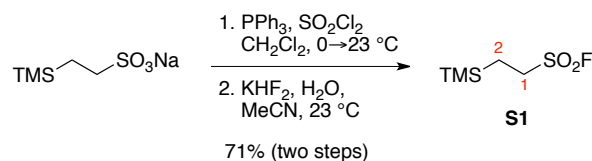

### **Sulfonyl Fluoride S1:**

Sulfonyl chloride (4.60 mL, 56.7 mmol, 2.20 equiv) was added dropwise via syringe over 6 min to a solution of triphenylphosphine (13.5 g, 51.6 mmol, 2.00 equiv) in dichloromethane (20.6 mL) at 0 °C. After stirring at this temperature for 10 min, a sample of sodium 2-(trimethylsilyl)ethanesulfonate (95 % purity, 5.60 g, 25.8 mmol, 1 equiv) was added as a solid in 12 portions over 6 min. After an additional 20 min at 0 °C, the ice bath was removed and the resulting yellow suspension was allowed to stir vigorously at 23 °C. After 24 h, the mixture was added dropwise via Pasteur pipette to a 500-mL round-bottom flask containing pentane (100 mL) with vigorous stirring over 15 min. After stirring for an additional 35 min, the suspension was diluted with pentane (100 mL) and was filtered through a 5.5-cm pad of silica gel, pre-packed with pentane in a 7.3-cm diameter column. The filter cake was washed with a solution of 5% diethyl ether in pentane (800 mL)<sup>4</sup> and the filtrate was concentrated under reduced pressure to yield crude 2-(trimethylsilyl)ethanesulfonyl chloride as a pale-yellow oil, which was used directly in the next step without further purification.<sup>5</sup>

Under an air atmosphere, a 50-mL polypropylene Falcon tube containing a solution of potassium bifluoride (4.03 g, 51.6 mmol, 2.00 equiv) in deionized water (12.0 mL) at 23 °C was charged with a solution of crude 2-(trimethylsilyl)ethanesulfonyl chloride in HPLC-grade acetonitrile (10.0 mL). The transfer was quantitated with additional acetonitrile (2 × 3.0 mL). After vigorous stirring for 16 h, the layers were separated and the aqueous layer was extracted with diethyl ether (3 × 30 mL). The combined organic extracts were washed successively with a 10% aqueous sodium chloride solution (2 × 50 mL) and a saturated aqueous sodium chloride solution (50 mL), were dried over anhydrous sodium sulfate, were filtered, and were concentrated under reduced pressure. The residue was purified by flash column chromatography on silica gel (eluent: 2→4% diethyl ether in pentane) to afford sulfonyl fluoride **S1** (3.38 g, 71.1%) as a colorless oil.

<sup>1</sup>H NMR (500 MHz, CDCl<sub>3</sub>, 20 °C): δ 3.34–3.24 (m, 2H, C1H<sub>2</sub>), 1.23–1.13 (m, 2H, C2H<sub>2</sub>), 0.10 (s, 9H, Si(CH<sub>3</sub>)<sub>3</sub>).

<sup>13</sup>C NMR (125.8 MHz, CDCl<sub>3</sub>, 20 °C): δ 48.1 (d, *J*<sub>C,F</sub> = 16.4 Hz, C1), 10.6 (C2), –2.0 (Si(CH<sub>3</sub>)<sub>3</sub>).

<sup>19</sup>F NMR (470.9 MHz, CDCl<sub>3</sub>, 20 °C): δ 47.1 (s, SO<sub>2</sub>F).

FTIR (thin film) cm<sup>-1</sup>: 2958 (m), 2903 (w), 1399 (s), 1255 (s), 1206 (s), 1175 (w), 1125 (w), 1021 (w), 900 (m), 838 (s), 812 (s), 764 (s), 739 (m), 696 (m), 548 (s).

HRMS (DART) (*m/z*): calc'd for C<sub>5</sub>H<sub>17</sub>FNO<sub>2</sub>SSi [M+NH<sub>4</sub>]<sup>+</sup>: 202.0728, found: 202.0723.

TLC (4% diethyl ether in pentane), *R*<sub>f</sub>: 0.41 (KMnO<sub>4</sub>).

4. The filtrate was monitored by TLC (4% diethyl ether in pentane, KMnO<sub>4</sub>) to ensure complete recovery of the sulfonyl chloride.  
 5. Procedure adapted from Han, X.; Civiello, R. L.; Fang, H.; Wu, D.; Gao, Q.; Chaturvedula, P. V.; Macor, J. E.; Dubowchik, G. *M. J. Org. Chem.* **2008**, *73*, 8502.

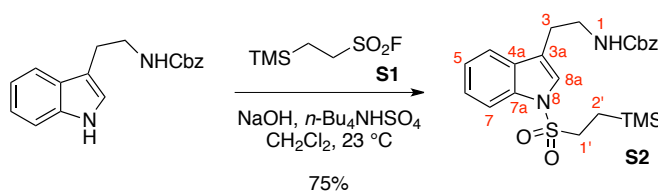

### **Tryptamine S2:**

2-(Trimethylsilyl)ethanesulfonyl fluoride<sup>6</sup> (**S1**, 1.87 g, 10.2 mmol, 1.30 equiv) was added dropwise via syringe to a suspension of benzyl (2-(1*H*-indol-3-yl)ethyl)carbamate<sup>7</sup> (2.30 g, 7.81 mmol, 1 equiv), freshly crushed sodium hydroxide (937 mg, 23.4 mmol, 3.00 equiv), and tetra-*n*-butylammonium hydrogen sulfate (265 mg, 0.781 mmol, 0.100 equiv) in dichloromethane (31 mL) at 23 °C. After vigorous stirring for 8 h, the suspension was cooled to 0 °C and was acidified by portionwise addition of an aqueous hydrogen chloride solution (1 N, 31 mL). After warming to 23 °C, the biphasic mixture was diluted with deionized water (30 mL) and the layers were separated. The aqueous phase was extracted with dichloromethane (3 × 30 mL) and the combined organic extracts were washed successively with water (2 × 100 mL) and a saturated aqueous sodium chloride solution (100 mL), were dried over anhydrous sodium sulfate, were filtered, and were concentrated under reduced pressure. The resulting residue was purified by flash column chromatography on silica gel (eluent: 20%→25% ethyl acetate in hexanes) to afford tryptamine **S2** (2.69 g, 75.1%) as a colorless viscous oil. Structural assignments were made using additional information from gCOSY, gHSQC, and gHMBC experiments.

<sup>1</sup>H NMR (500 MHz, CDCl<sub>3</sub>, 20 °C):

δ 7.88 (d, *J* = 8.2 Hz, 1H, C7H), 7.61 (d, *J* = 7.8 Hz, 1H, C4H), 7.40–7.29 (m, 7H, C5H, C6H, Ar<sub>Cbz</sub>H), 7.28 (s, 1H, C8aH), 5.11 (s, 2H, N1CO<sub>2</sub>CH<sub>2</sub>Ph), 4.92 (br-t, *J* = 6.1 Hz, 1H, HN1CO<sub>2</sub>CH<sub>2</sub>Ph), 3.53 (app-q, *J* = 6.8 Hz, 2H, C2H), 3.20–3.10 (m, 2H, C1'H), 2.95 (t, *J* = 7.0 Hz, 2H, C3H), 0.94–0.80 (m, 2H, C2'H), –0.05 (s, 9H, Si(CH<sub>3</sub>)<sub>3</sub>).

<sup>13</sup>C NMR (125.8 MHz, CDCl<sub>3</sub>, 20 °C):

δ 156.5 (N1CO<sub>2</sub>CH<sub>2</sub>Ph), 136.6 (Ar<sub>Cbz</sub>), 135.6 (C7a), 130.5 (C4a), 128.7 (Ar<sub>Cbz</sub>), 128.3 (Ar<sub>Cbz</sub>), 128.2 (Ar<sub>Cbz</sub>), 125.0 (C6), 124.1 (C8a), 123.2 (C5), 119.7 (C4), 118.4 (C3a), 113.3 (C7), 66.8 (N1CO<sub>2</sub>CH<sub>2</sub>Ph), 50.7 (C1'), 40.7 (C2), 25.7 (C3), 10.1 (C2'), –2.0 (Si(CH<sub>3</sub>)<sub>3</sub>).

FTIR (thin film) cm<sup>-1</sup>:

3408 (br-w), 3341 (br-w), 2952 (w), 1702 (m), 1517 (m), 1448 (m), 1357 (m), 1249 (s), 1155 (s), 976 (m), 741 (s).

HRMS (ESI) (*m/z*):

calc'd for C<sub>23</sub>H<sub>30</sub>N<sub>2</sub>NaO<sub>4</sub>SSi [M+Na]<sup>+</sup>: 481.1588,  
 found: 481.1588.

TLC (20% ethyl acetate in hexanes), *R<sub>f</sub>*:

0.28 (UV, CAM).

6. (a) When the corresponding sulfonyl chloride was used, the yield of sulfonamide **S2** was only 20%. (b) For a review of sulfur(VI) fluorides and their use in organic synthesis, see Dong, J.; Krasnova, L.; Finn, M. G.; Sharpless, K. B. *Angew. Chem. Int. Ed.* **2014**, *53*, 9430.

7. Kandukuri, S. R.; Schiffner, J. A.; Oestreich, M. *Angew. Chem. Int. Ed.* **2012**, *51*, 1265.

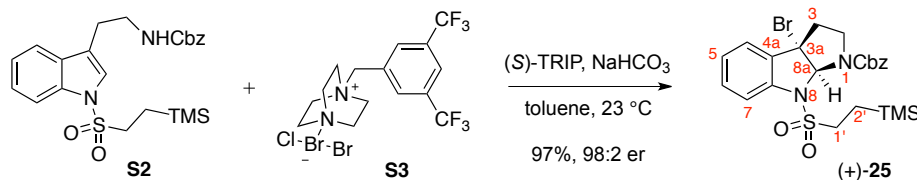

### **Bromocyclotryptamine (+)-25:**

A sample of bromine salt **S3**<sup>8</sup> (5.63 g, 10.5 mmol, 1.30 equiv) was added to a suspension of tryptamine **S2** (3.72 g, 8.10 mmol, 1 equiv), (*S*)-3,3'-bis(2,4,6-triisopropylphenyl)-1,1'-binaphthyl-2,2'-diyl hydrogenphosphate<sup>9</sup> ((*S*)-TRIP, 610 mg, 0.810 mmol, 0.100 equiv), and crushed sodium hydrogen carbonate (2.72 g, 32.4 mmol, 4.00 equiv) in toluene (162 mL) at 23 °C. After stirring for 24 h, the orange suspension was diluted with a saturated aqueous sodium thiosulfate solution (160 mL) and deionized water (320 mL) and was stirred vigorously for 15 min. The layers were separated and the aqueous layer was extracted with ethyl acetate (3 × 160 mL). The combined organic extracts were washed successively with an aqueous sodium thiosulfate solution (1 M, 320 mL) and a saturated aqueous sodium chloride solution (200 mL), were dried over anhydrous sodium sulfate, were filtered, and were concentrated under reduced pressure. The resulting residue was purified by flash column chromatography on silica gel (eluent: 14%→15% ethyl acetate in hexanes) to afford bromocyclotryptamine (+)-**25** (4.21 g, 96.6%, 98:2 er) as a white foam.<sup>10</sup> The enantiomeric ratio was determined by chiral HPLC analysis (CHIRALPAK<sup>®</sup> IA, 10% *i*PrOH in hexanes, 1.0 mL/min, 210 nm, *t*<sub>R</sub> (major) = 10.3 min, *t*<sub>R</sub> (minor) = 12.7 min). As a result of the slow conformational equilibration at ambient temperature, NMR spectra were collected at elevated temperature. Structural assignments were made using additional information from gCOSY, gHSQC, and gHMBC experiments also collected at elevated temperature.

<sup>1</sup>H NMR (400 MHz, CD<sub>3</sub>CN, 60 °C):

δ 7.52 (ddd, *J* = 7.7, 1.4, 0.6 Hz, 1H, C4H), 7.45–7.28 (m, 7H, C6H, C7H, Ar<sub>Cbz</sub>H), 7.23 (ddd, *J* = 7.7, 7.1, 1.3 Hz, 1H, C5H), 6.34 (s, 1H, C8aH), 5.25–5.11 (m, 2H, N1CO<sub>2</sub>CH<sub>2</sub>Ph), 3.86–3.75 (m, 1H, C2H<sub>a</sub>), 3.56 (td, *J* = 13.4, 4.7 Hz, 1H, C1'H<sub>a</sub>), 3.35 (td, *J* = 13.5, 4.8 Hz, 1H, C1'H<sub>b</sub>), 3.01–2.90 (m, 1H, C3H<sub>a</sub>), 2.89–2.78 (m, 2H, C2H<sub>b</sub>, C3H<sub>b</sub>), 1.10 (m, 2H, C2'H<sub>2</sub>), 0.04 (s, 9H, Si(CH<sub>3</sub>)<sub>3</sub>).

<sup>13</sup>C NMR (100.6 MHz, CD<sub>3</sub>CN, 60 °C):

δ 155.5 (N1CO<sub>2</sub>CH<sub>2</sub>Ph), 143.3 (C7a), 138.0 (Ar<sub>Cbz</sub>), 134.7 (C4a), 131.8 (C6), 129.8 (Ar<sub>Cbz</sub>), 129.4 (Ar<sub>Cbz</sub>), 129.2 (Ar<sub>Cbz</sub>), 126.6 (C5), 125.6 (C4), 118.9 (C7), 88.3 (C8a), 68.6 (N1CO<sub>2</sub>CH<sub>2</sub>Ph), 64.5 (C3a), 51.9 (C1'), 47.4 (C2), 42.0 (C3), 11.3 (C2'), -1.6 (Si(CH<sub>3</sub>)<sub>3</sub>).

FTIR (thin film) cm<sup>-1</sup>:

2953 (w), 2896 (w), 1705 (s), 1601 (w), 1408 (s), 1353 (s), 1251 (m), 1197 (m), 1148 (s), 844 (s), 753 (s).

HRMS (ESI) (*m/z*):

calc'd for C<sub>23</sub>H<sub>30</sub>BrN<sub>2</sub>O<sub>4</sub>SSi [M+H]<sup>+</sup>: 537.0873,  
 found: 537.0878.

[α]<sub>D</sub><sup>23</sup>:

+198 (*c* = 0.37, CH<sub>2</sub>Cl<sub>2</sub>).

TLC (20% ethyl acetate in hexanes), R<sub>f</sub>:

0.36 (UV, CAM).

8. Xie, W.; Jiang, G.; Liu, H.; Hu, J.; Pan, X.; Zhang, H.; Wan, X.; Lai, Y.; Ma, D. *Angew. Chem. Int. Ed.* **2013**, *52*, 12924.

9. Hoffmann, S.; Seayad, A. M.; List, B. *Angew. Chem., Int. Ed.* **2005**, *44*, 7424.

10. Further elution with 60% ethyl acetate in hexanes enables recovery of the (*S*)-TRIP catalyst.



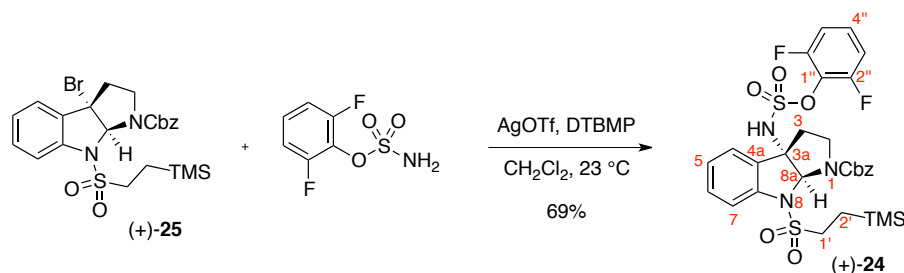

### Sulfamate ester (+)-24:

A sample of silver trifluoromethanesulfonate (2.72 g, 10.6 mmol, 2.00 equiv) was added to a solution of bromocyclotryptamine (+)-**25** (2.85 g, 5.30 mmol, 1 equiv), 2,6-difluorophenyl sulfamate<sup>11</sup> (2.22 g, 10.6 mmol, 2.00 equiv), and 2,6-di-*tert*-butyl-4-methylpyridine (DTBMP, 2.72 g, 13.2 mmol, 2.50 equiv) in dichloromethane (132 mL) at 23 °C in the dark. After 1.5 h, the off-white milky suspension was diluted with ethyl acetate (265 mL) and was filtered through a pad of silica gel covered with a pad of Celite. The filter cake was washed with ethyl acetate (500 mL) and the colorless filtrate was concentrated under reduced pressure. The residue was purified by flash column chromatography on silica gel (eluent: 50%→60% diethyl ether in hexanes) to yield a white foam, which was further purified by flash column chromatography on silica gel (eluent: 1%→4% acetonitrile in dichloromethane) to afford pure sulfamate ester (+)-**24** (2.42 g, 68.5%) as a white foam. As a result of the slow conformational equilibration at ambient temperature, NMR spectra were collected at elevated temperature. Structural assignments were made using additional information from gCOSY, gHSQC, and gHMBC experiments also collected at elevated temperature.

<sup>1</sup>H NMR (400 MHz, CD<sub>3</sub>CN, 60 °C):

δ 7.51 (dt, *J* = 7.7, 1.0 Hz, 1H, C4H), 7.44–7.28 (m, 8H, C6H, C7H, C4''H, Ar<sub>Cbz</sub>H), 7.25–7.17 (m, 1H, C5H), 7.16–7.08 (m, 2H, C3''H), 6.98 (br-s, 1H, NHSO<sub>3</sub>Ar), 6.55 (s, 1H, C8aH), 5.28–5.09 (m, 2H, N1CO<sub>2</sub>CH<sub>2</sub>Ph), 4.08–3.94 (m, 1H, C2H<sub>a</sub>), 3.41 (br-t, *J* = 11.2 Hz, 1H, C1'H<sub>a</sub>), 3.25 (td, *J* = 13.4, 4.5 Hz, 1H, C1'H<sub>b</sub>), 2.94–2.78 (m, 2H, C2H<sub>b</sub>, C3H<sub>a</sub>), 2.57–2.44 (m, 1H, C3H<sub>b</sub>), 1.18–0.97 (m, 2H, C2'H<sub>2</sub>), 0.03 (s, 9H, Si(CH<sub>3</sub>)<sub>3</sub>).

<sup>13</sup>C NMR (100.6 MHz, CD<sub>3</sub>CN, 60 °C):

δ 157.3 (dd, *J* = 252, 3.5 Hz, C2''), 155.7 (N1CO<sub>2</sub>CH<sub>2</sub>Ph), 144.7 (C7a), 138.0 (Ar<sub>Cbz</sub>), 132.0 (C6), 131.1 (C4a), 129.74 (Ar<sub>Cbz</sub>), 129.66 (t, *J* = 9.4 Hz, C4''), 129.3 (Ar<sub>Cbz</sub>), 129.2 (Ar<sub>Cbz</sub>), 127.9 (t, *J* = 15.7 Hz, C1''), 126.3 (C4), 125.7 (C5), 117.7 (C7), 114.2–113.9 (m, C3''), 84.1 (C8a), 74.1 (C3a), 68.6 (N1CO<sub>2</sub>CH<sub>2</sub>Ph), 51.3 (C1'), 46.2 (C2), 36.8 (C3), 11.1 (C2'), –1.6 (Si(CH<sub>3</sub>)<sub>3</sub>).

<sup>19</sup>F NMR (376.4 MHz, CD<sub>3</sub>CN, 25 °C):

δ –126.2 (s, C<sub>6</sub>H<sub>3</sub>F<sub>2</sub>).

FTIR (thin film) cm<sup>-1</sup>:

3161 (br-w), 2951 (w), 2896 (w), 1703 (m), 1682 (m), 1603 (m), 1479 (m), 1412 (m), 1345 (m), 1174 (m).

HRMS (ESI) (*m/z*):

calc'd for C<sub>29</sub>H<sub>33</sub>F<sub>2</sub>N<sub>3</sub>NaO<sub>7</sub>S<sub>2</sub>Si [M+Na]<sup>+</sup>: 688.1389, found: 688.1367.

$[\alpha]_{\text{D}}^{22}$ : +84 ( $c = 0.33$ ,  $\text{CH}_2\text{Cl}_2$ ).

TLC (2% acetonitrile in dichloromethane),  $R_f$ : 0.26 (UV, CAM).

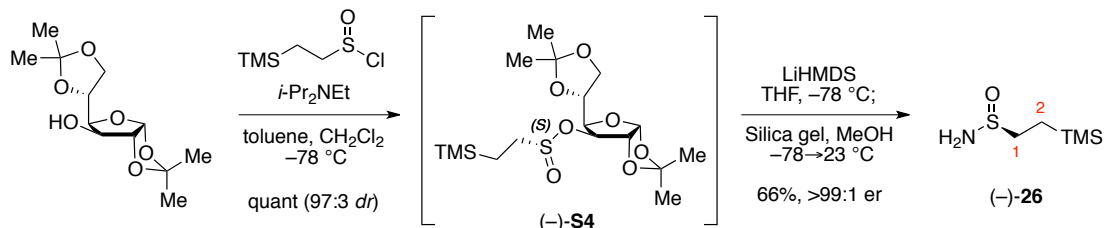

### **(-)-(S)-2-(Trimethylsilyl)ethanesulfinamide (26):**

A solution of freshly prepared ( $\pm$ )-2-(trimethylsilyl)ethanesulfinyl chloride<sup>12</sup> (11.8 g, 64.3 mmol, 1.25 equiv) in toluene (75 mL) was added dropwise from a pressure-equalizing addition funnel over 75 min<sup>13</sup> to a solution of (-)-diacetone-D-glucose<sup>14</sup> (13.4 g, 51.4 mmol, 1 equiv) and *N,N*-diisopropylethylamine (13.0 mL, 74.6 mmol, 1.45 equiv) in toluene (440 mL) and dichloromethane (70 mL) at  $-78^\circ\text{C}$ . After 2 h, the viscous milky solution was diluted with a saturated aqueous ammonium chloride solution (500 mL) and deionized water (50 mL) and the mixture was allowed to stir in a  $23^\circ\text{C}$  water bath. After 75 min, the layers were separated and the aqueous layer was extracted with diethyl ether ( $3 \times 300$  mL). The combined organic extracts were washed successively with an aqueous hydrogen chloride solution (1 M, 500 mL), a saturated aqueous sodium bicarbonate solution (400 mL), and a saturated aqueous sodium chloride solution (400 mL), were dried over anhydrous sodium sulfate, were filtered, and were concentrated to yield crude ( $S_S$ )-alkanesulfinamide (-)-S4 (21.8 g, quantitative yield, 97:3 dr)<sup>15</sup> as a light yellow viscous oil. This inseparable mixture of diastereomers was used directly in the next step without further purification.<sup>16</sup>

The sample of crude ( $S_S$ )-alkanesulfinamide (-)-S4 was azeotropically dried by concentration from benzene ( $3 \times 100$  mL). The flask was then charged with a stir bar, capped with a rubber septum, and placed under high vacuum ( $\sim 0.1$  Torr). After 25 min, the flask was refilled with argon and the residue was dissolved in tetrahydrofuran (206 mL). The rubber-septum was replaced with an oven-dried pressure-equalizing addition funnel and the resulting solution was cooled to  $-78^\circ\text{C}$ . Subsequently, a solution of lithium bis(trimethylsilyl)amide (1.0 M in tetrahydrofuran, 54.0 mL, 54.0 mmol, 1.05 equiv) was added dropwise over 42 min, after which the addition funnel was rinsed with tetrahydrofuran (2.0 mL). After stirring at  $-78^\circ\text{C}$  for an additional 90 min, methanol (83.0 mL, 2.06 mol, 40.0 equiv) and silica gel (51.4 g) were added sequentially and the suspension was allowed to stir in a  $23^\circ\text{C}$  water bath. After 1 h, the suspension was concentrated under reduced pressure and the resulting silica-adsorbed crude mixture was purified by flash column chromatography on silica gel (eluent: 10%  $\rightarrow$  40% acetone in dichloromethane) to yield (-)-(S)-2-(trimethylsilyl)ethanesulfinamide<sup>17</sup> (26, 8.34 g, 98.1%, 88:12 er) as a light-yellow viscous oil, which solidified to an off-white waxy solid on concentration from *n*-heptane ( $3 \times 30$  mL) and

12. Prepared from *tert*-butyl 2-(trimethylsilyl)ethyl sulfoxide, according to Schwan, A. L.; Brillon, D.; Dufault, R. *Can. J. Chem.* **1994**, *72*, 325.

13. During this time, the internal temperature of the reaction mixture did not exceed  $-75^\circ\text{C}$ .

14. For relevant studies on the use of (-)-diacetone-D-glucose (DAG) as a chiral controller for the preparation of chiral sulfoxides and sulfinamides, see: (a) Llera, J. M.; Fernández, I.; Alcludia, F. *Tetrahedron Lett.* **1991**, *32*, 7299. (b) Fernández, I.; Khiar, N.; Llera, J. M.; Alcludia, F. *J. Org. Chem.* **1992**, *57*, 6789. (c) Khiar, N.; Fernández, I.; Alcludia, F. *Tetrahedron Lett.* **1994**, *35*, 5719. (d) Fernández, I.; Valdivia, V.; Khiar, N. *J. Org. Chem.* **2008**, *73*, 745. (e) Chelouan, A.; Recio, R.; Alcludia, A.; Khiar, N.; Fernández, I. *Eur. J. Org. Chem.* **2014**, 6935.

15. The absolute configuration of alkanesulfinamide (-)-S4 at sulfur was inferred by comparison to literature precedent (see ref. 14).

16. For structural characterization, a sample of (-)-S4 was purified by flash column chromatography on silica gel (eluent: 30  $\rightarrow$  40% diethyl ether in hexanes).  $^1\text{H}$  NMR (500 MHz,  $\text{CDCl}_3$ ,  $20^\circ\text{C}$ , 97:3 dr):  $\delta$  5.90 (d,  $J = 3.6$  Hz, 1H), 4.73 (d,  $J = 2.8$  Hz, 1H), 4.62 (d,  $J = 3.6$  Hz, 1H), 4.32–4.23 (m, 2H), 4.08 (dd,  $J = 8.5, 6.0$  Hz, 1H), 4.00 (dd,  $J = 8.5, 5.1$  Hz, 1H), 2.79–2.62 (m, 2H), 1.50 (s, 3H), 1.42 (s, 3H), 1.33 (s, 3H), 1.30 (s, 3H), 0.94–0.74 (m, 2H), 0.04 (s, 9H).  $\delta$   $^{13}\text{C}$  NMR (150.9 MHz,  $\text{CDCl}_3$ ,  $20^\circ\text{C}$ , 97:3 dr):  $\delta$  112.5, 109.3, 105.1, 83.8, 80.5, 79.0, 72.5, 66.8, 53.0, 26.9, 26.8, 26.4, 25.3, 7.6,  $-1.8$ . FTIR (thin film)  $\text{cm}^{-1}$ : 2987 (w), 2954 (w), 2896 (w), 1372 (m), 1250 (m), 1214 (m), 1161 (m), 1133 (m), 1072 (s), 1017 (s), 952 (m), 825 (s), 733 (m). HRMS (DART) ( $m/z$ ): calc'd for  $\text{C}_{17}\text{H}_{33}\text{O}_7\text{SSi}$  [ $\text{M}+\text{H}$ ] $^+$ : 409.1711, found: 409.1710.  $[\alpha]_{\text{D}}^{23}$ :  $-56$  ( $c = 1.51, \text{CH}_2\text{Cl}_2$ ).

17. The absolute configuration of sulfinamide (-)-26 was inferred by comparison to literature precedent (see ref. 14) and by preparation of a derivative with a known stereochemical configuration as described later in this document.

standing for 7 h under high vacuum (~0.1 Torr).<sup>18</sup> The enantiomeric ratio was determined by chiral HPLC analysis of a 3 mg/mL solution of (–)-**26** in hexanes (CHIRALCEL<sup>®</sup> OD-H, 4% *i*PrOH in hexanes, 1.0 mL/min, 210 nm,  $t_R$  (minor) = 16.3 min,  $t_R$  (major) = 18.2 min).

To enrich the enantiomeric ratio, the product was transferred to a 100-mL round-bottom flask and was crushed with a Teflon rod. *n*-Heptane (30 mL) was added and the resulting suspension was sonicated for 1 h at 23 °C under an atmosphere of argon. A stir bar and an additional portion of *n*-heptane (10 mL) were added and the suspension was stirred vigorously at 0 °C for 30 min. The solid was then collected by filtration and was washed with cold (–20 °C) *n*-heptane (35 mL). Drying under vacuum (~10 Torr) for 14 h provided (–)-**26** (5.60 g, 65.9%, >99:1 er) as a flocculent white solid. The enantiomeric ratio was determined by chiral HPLC analysis of a 3 mg/mL solution of (–)-**26** in hexanes (CHIRALCEL<sup>®</sup> OD-H, 4% *i*PrOH in hexanes, 1.0 mL/min, 210 nm,  $t_R$  (minor) = 16.6 min,  $t_R$  (major) = 18.2 min).

<sup>1</sup>H NMR (500 MHz, CDCl<sub>3</sub>, 20 °C):  $\delta$  4.14 (s, 2H, NH<sub>2</sub>), 2.78–2.56 (m, 2H, C1H<sub>2</sub>), 0.96–0.79 (m, 2H, C2H<sub>2</sub>), 0.04 (s, 9H, Si(CH<sub>3</sub>)<sub>3</sub>).

<sup>13</sup>C NMR (125.8 MHz, CDCl<sub>3</sub>, 20 °C):  $\delta$  52.9 (C1), 8.4 (C2), –1.8 (Si(CH<sub>3</sub>)<sub>3</sub>).

FTIR (thin film) cm<sup>–1</sup>: 3222 (br-m), 2954 (m), 2897 (m), 2809 (w), 1653 (m), 1577 (m), 1419 (m), 1249 (m), 1162 (m), 1036 (br-m).

HRMS (DART) ( $m/z$ ): calc'd for C<sub>5</sub>H<sub>16</sub>NOSSi [M+H]<sup>+</sup>: 166.0716, found: 166.0719.

[ $\alpha$ ]<sub>D</sub><sup>23</sup>: –22 ( $c$  = 1.47, CH<sub>2</sub>Cl<sub>2</sub>).

TLC (40% acetone in dichloromethane), R<sub>f</sub>: 0.38 (UV, CAM).

---

18. (–)-Diacetone-D-glucose (12.4 g, 92.6%) was also recovered as an amorphous white solid, which can be recycled without further purification.

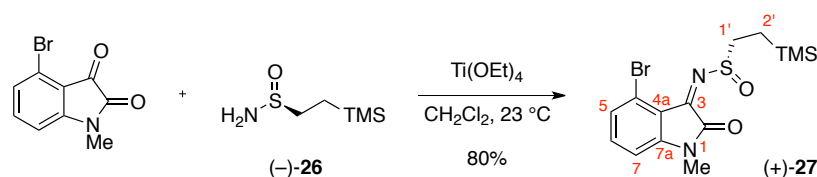

### Alkanesulfinyl imine (+)-27:

Titanium ethoxide<sup>19</sup> (16.3 mL, 67.1 mmol, 2.20 equiv) was added via syringe to a stirred solution of (–)-(S)-2-(trimethylsilyl)ethanesulfinamide (**26**, 5.55 g, 33.6 mmol, 1.10 equiv) and 4-bromo-1-methylisatin<sup>20</sup> (7.33 g, 30.5 mmol, 1 equiv) in dichloromethane (61.0 mL) at 23 °C. After 20 h, the reaction mixture was diluted with dichloromethane (61 mL) and deionized water (2.40 mL, 133 mmol, 4.40 equiv) was then added dropwise over 4 min with vigorous stirring. The resulting thick red slurry was diluted with an additional portion of dichloromethane (120 mL) and was stirred vigorously. After 10 min, oven-dried Celite (24 g) was added and the suspension was concentrated under reduced pressure. The Celite-adsorbed crude mixture was purified by flash column chromatography on silica gel (eluent: 5%→20% ethyl acetate in dichloromethane) to yield alkanesulfinyl imine (+)-**27** (9.47 g, 80.1%) as a dark orange solid. Structural assignments were made using additional information from gCOSY, gHSQC, gHMBC, and 1D selective NOESY experiments.

<sup>1</sup>H NMR (500 MHz, CDCl<sub>3</sub>, 20 °C): δ 7.34–7.27 (m, 2H, C5H, C6H), 6.83 (app-d, *J* = 7.2 Hz, 1H, C7H), 3.25 (s, 3H, N1CH<sub>3</sub>), 3.06–2.96 (m, 1H, C1'H<sub>a</sub>), 2.95–2.86 (m, 1H, C1'H<sub>b</sub>), 1.19–1.06 (m, 2H, C2'H), 0.04 (s, 9H, Si(CH<sub>3</sub>)<sub>3</sub>).

<sup>13</sup>C NMR (125.8 MHz, CDCl<sub>3</sub>, 20 °C): δ 157.3 (C2), 155.3 (C3), 149.5 (C7a), 135.3 (C6), 129.1 (C5), 121.1 (C4), 117.7 (C4a), 108.3 (C7), 53.4 (C1'), 26.6 (N1CH<sub>3</sub>), 9.3 (C2'), –1.6 (Si(CH<sub>3</sub>)<sub>3</sub>).

FTIR (thin film) cm<sup>-1</sup>: 3080 (w), 2952 (m), 2894 (w), 1723 (s), 1596 (s), 1456 (m), 1355 (m), 1322 (m), 1249 (m), 1109 (s).

HRMS (ESI) (*m/z*): calc'd for C<sub>14</sub>H<sub>20</sub>BrN<sub>2</sub>O<sub>2</sub>SSi [M+H]<sup>+</sup>: 387.0193, found: 387.0185.

[α]<sub>D</sub><sup>23</sup>: +447 (*c* = 0.31, CH<sub>2</sub>Cl<sub>2</sub>).

TLC (10% ethyl acetate in dichloromethane), R<sub>f</sub>: 0.29 (UV, CAM).

19. Strem Chemicals Inc. cat# 93-2209, containing 5-15% isopropanol, was dispensed assuming 85 w/w% purity.

20. Sin, N.; Venables, B. L.; Liu, X.; Huang, S.; Gao, Q.; Ng, A.; Dalterio, R.; Rajamani, R.; Meanwell, N. A. *J. Heterocyclic Chem.* **2009**, *46*, 432.

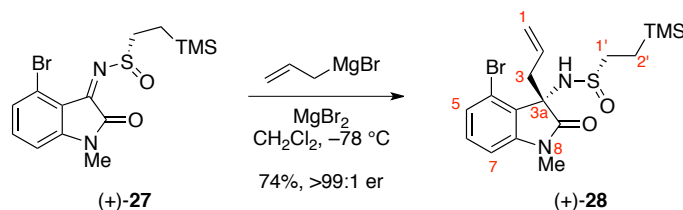

### Allyl oxindole (+)-28:

A sample of alkanesulfinyl imine (+)-27 (9.45 g, 24.4 mmol, 1 equiv) was azeotropically dried by concentration from benzene (3 × 80 mL). The flask was then charged with a stir bar, capped with a rubber septum, and placed under high vacuum (~0.1 Torr) for 14 h. A sample of magnesium bromide (8.98 g, 48.8 mmol, 2.00 equiv) and dichloromethane (160 mL) were added and the rubber septum was then replaced with an oven-dried pressure-equalizing addition funnel. The resulting dark orange suspension was cooled to -78 °C and subsequently a solution of allylmagnesium bromide (1.28 M in diethyl ether, 19.8 mL, 25.3 mmol, 1.04 equiv) was added dropwise over 30 min. After stirring for an additional 45 min, the bright yellow suspension was diluted with a saturated aqueous ammonium chloride solution (160 mL) and deionized water (160 mL). The cold-bath was removed and the mixture was allowed to warm to 23 °C with vigorous stirring. The layers were separated and the aqueous layer was extracted with dichloromethane (3 × 100 mL). The combined organic extracts were washed with a saturated aqueous sodium chloride solution (300 mL), were dried over anhydrous sodium sulfate, were filtered, and were concentrated under reduced pressure. The resulting residue was purified by flash column chromatography on silica gel (eluent: 6→20% acetone in dichloromethane) to afford allyl oxindole (+)-28 (7.76 g, 74.1%, >99:1 er) as a yellow solid. The enantiomeric ratio was determined by chiral HPLC analysis (CHIRALCEL<sup>®</sup> OD-H, 30% *i*-PrOH in hexanes, 0.7 mL/min, 220 nm,  $t_R$  (major) = 10.4 min,  $t_R$  (minor) = 6.6 min). Structural assignments were made using additional information from gCOSY, gHSQC, gHMBC, and 1D selective NOESY experiments.

|                                                             |                                                                                                                                                                                                                                                                                                                                                                                                                                                                                                                                                   |
|-------------------------------------------------------------|---------------------------------------------------------------------------------------------------------------------------------------------------------------------------------------------------------------------------------------------------------------------------------------------------------------------------------------------------------------------------------------------------------------------------------------------------------------------------------------------------------------------------------------------------|
| <sup>1</sup> H NMR (500 MHz, CDCl <sub>3</sub> , 20 °C):    | δ 7.22–7.15 (m, 2H, C5H, C6H), 6.82–6.75 (m, 1H, C7H), 5.23 (app-ddt, $J$ = 17.1, 9.9, 7.3 Hz, 1H, C2H), 5.07 (app-dq, $J$ = 17.0, 1.3 Hz, 1H, C1H <sub>a</sub> ), 4.91 (dd, $J$ = 10.1, 1.8 Hz, 1H, C1H <sub>b</sub> ), 4.55 (s, 1H, NH), 3.21 (s, 3H, N8CH <sub>3</sub> ), 3.15 (dd, $J$ = 12.9, 6.9 Hz, 1H, C3H <sub>a</sub> ), 2.81 (dd, $J$ = 12.9, 7.7 Hz, 1H, C3H <sub>b</sub> ), 2.78–2.69 (m, 1H, C1'H <sub>a</sub> ), 2.69–2.58 (m, 1H, C1'H <sub>b</sub> ), 0.92–0.81 (m, 2H, C2'H), 0.02 (s, 9H, Si(CH <sub>3</sub> ) <sub>3</sub> ). |
| <sup>13</sup> C NMR (125.8 MHz, CDCl <sub>3</sub> , 20 °C): | δ 174.5 (C8a), 145.1 (C7a), 131.1 (C6), 129.4 (C2), 127.28 (C4a), 127.25 (C5), 120.7 (C1), 119.9 (C4), 107.8 (C7), 66.6 (C3a), 53.3 (C1'), 39.9 (C3), 26.6 (N8CH <sub>3</sub> ), 8.6 (C2'), -1.7 (Si(CH <sub>3</sub> ) <sub>3</sub> ).                                                                                                                                                                                                                                                                                                            |
| FTIR (thin film) cm <sup>-1</sup> :                         | 3249 (m), 2954 (m), 1716 (s), 1602 (s), 1583 (m), 1456 (m), 1343 (m), 1292 (m), 1074 (m).                                                                                                                                                                                                                                                                                                                                                                                                                                                         |
| HRMS (ESI) ( $m/z$ ):                                       | calc'd for C <sub>17</sub> H <sub>26</sub> BrN <sub>2</sub> O <sub>2</sub> SSi [M+H] <sup>+</sup> : 429.0662, found: 429.0675.                                                                                                                                                                                                                                                                                                                                                                                                                    |
| [α] <sub>D</sub> <sup>23</sup> :                            | +15 ( $c$ = 0.29, CH <sub>2</sub> Cl <sub>2</sub> ).                                                                                                                                                                                                                                                                                                                                                                                                                                                                                              |
| TLC (10% acetone in dichloromethane), R <sub>f</sub> :      | 0.27 (UV, CAM, KMnO <sub>4</sub> ).                                                                                                                                                                                                                                                                                                                                                                                                                                                                                                               |

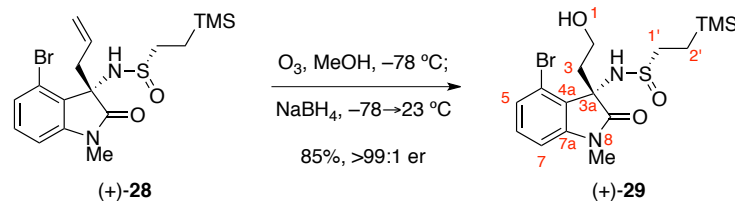

### Alcohol (+)-**29**:

Ozone-enriched dioxygen was bubbled through a solution of allyl oxindole (+)-**28** (6.94 g, 16.2 mmol, 1 equiv) in methanol (81 mL) at  $-78 \text{ }^\circ\text{C}$ . After 1.5 h, ozone bubbling was suspended and the solution was sparged with dinitrogen for 40 min. A sample of sodium borohydride<sup>21</sup> (2.12 g, 56.0 mmol, 3.46 equiv) was then added in 16 portions over 16 min. The cold bath was removed and the mixture was allowed to warm to  $23 \text{ }^\circ\text{C}$ . After 1 h, the solution was concentrated under reduced pressure and the resulting slurry was diluted with a saturated aqueous ammonium chloride solution (80 mL) and deionized water (80 mL). The mixture was extracted with ethyl acetate ( $3 \times 100 \text{ mL}$ ) and the combined organic extracts were washed with a saturated aqueous sodium chloride solution (200 mL), were dried over anhydrous sodium sulfate, were filtered, and were concentrated under reduced pressure. The resulting residue was purified by flash column chromatography on silica gel (eluent: 20%  $\rightarrow$  40% acetone in dichloromethane) to afford alcohol (+)-**29** (5.94 g, 84.7%,  $>99:1 \text{ er}$ ) as an off-white foam. The enantiomeric ratio was determined by chiral HPLC analysis (CHIRALCEL<sup>®</sup> OD-H, 30% *i*-PrOH in hexanes, 0.7 mL/min, 220 nm,  $t_{\text{R}}$  (major) = 12.7 min,  $t_{\text{R}}$  (minor) = 7.7 min). Structural assignments were made using additional information from gCOSY, gHSQC, gHMBC, and 1D selective NOESY experiments.

$^1\text{H}$  NMR (500 MHz,  $\text{CDCl}_3$ ,  $20 \text{ }^\circ\text{C}$ ):

$\delta$  7.23–7.17 (m, 2H, C5H, C6H), 6.86–6.79 (m, 1H, C7H), 4.76 (s, 1H, NH), 3.75–3.63 (m, 1H, C2H<sub>a</sub>), 3.46 (app-dtd,  $J = 11.6, 7.8, 4.5 \text{ Hz}$ , 1H, C2H<sub>b</sub>), 3.22 (s, 3H, N8CH<sub>3</sub>), 2.79–2.68 (m, 1H, C1'H<sub>a</sub>), 2.68–2.56 (m, 2H, C1'H<sub>b</sub>, C3H<sub>a</sub>), 2.37 (dt,  $J = 14.2, 4.8 \text{ Hz}$ , 1H, C3H<sub>b</sub>), 2.18 (dd,  $J = 7.4, 4.2 \text{ Hz}$ , 1H, O1H), 0.91–0.79 (m, 2H, C2'H<sub>2</sub>), 0.02 (s, 9H, Si(CH<sub>3</sub>)<sub>3</sub>).

$^{13}\text{C}$  NMR (125.8 MHz,  $\text{CDCl}_3$ ,  $20 \text{ }^\circ\text{C}$ ):

$\delta$  175.7 (C8a), 145.0 (C7a), 131.3 (C6), 127.7 (C4a), 127.4 (C5), 119.9 (C4), 108.1 (C7), 65.4 (C3a), 58.2 (C2), 53.2 (C1'), 38.3 (C3), 26.9 (N8CH<sub>3</sub>), 8.7 (C2'),  $-1.7$  (Si(CH<sub>3</sub>)<sub>3</sub>).

FTIR (thin film)  $\text{cm}^{-1}$ :

3403 (br-m), 3242 (br-m), 2953 (m), 2893 (m), 1721 (s), 1605 (s), 1458 (s).

HRMS (ESI) ( $m/z$ ):

calc'd for  $\text{C}_{16}\text{H}_{26}\text{BrN}_2\text{O}_3\text{SSi} [\text{M}+\text{H}]^+$ : 433.0611,  
 found: 433.0615.

$[\alpha]_{\text{D}}^{23}$ :

+9 ( $c = 0.29, \text{CH}_2\text{Cl}_2$ ).

TLC (30% acetone in dichloromethane),  $R_f$ :

0.24 (UV, CAM).

21. (a) Sigma-Aldrich, cat# 452874 (granular, 10–40 mesh, 98%). (b) When powdered sodium borohydride (5 equiv, Sigma-Aldrich cat# 452882) was used, the intermediate aldehyde was often also observed, necessitating the addition of further reducing agent.

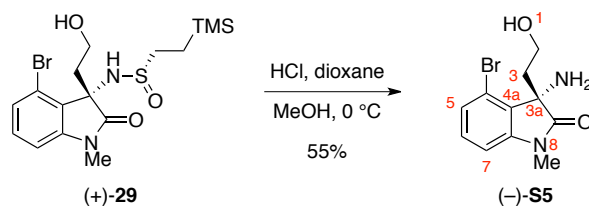

### Amino alcohol (–)-S5:

A solution of hydrogen chloride in 1,4-dioxane (4.0 M, 58.0  $\mu\text{L}$ , 232  $\mu\text{mol}$ , 2.01 equiv) was added dropwise via syringe to a solution of alcohol (+)-**29** (50.0 mg, 115  $\mu\text{mol}$ , 1 equiv) in methanol (2.30 mL) at 0 °C. After 1 h, a saturated aqueous sodium bicarbonate solution (23 mL) and an aqueous sodium hydroxide solution (1 M, 1 mL) were added and the mixture was extracted with ethyl acetate ( $8 \times 10$  mL). The combined organic extracts were dried over anhydrous sodium sulfate, were filtered, and were concentrated under reduced pressure. The resulting residue was purified by flash column chromatography on silica gel (eluent: 3% $\rightarrow$ 5% methanol in dichloromethane) to afford amino alcohol (–)-**S5** (18.1 mg, 55.1%) as a colorless film. Structural assignments were made using additional information from gCOSY, gHSQC, and gHMBC experiments.

$^1\text{H}$  NMR (500 MHz,  $\text{CDCl}_3$ , 20 °C):  $\delta$  7.22–7.13 (m, 2H, C5H, C6H), 6.88–6.65 (m, 1H, C7H), 3.71 (app-dt,  $J = 11.6, 5.2$  Hz, 1H, C2H<sub>a</sub>), 3.50 (ddd,  $J = 11.6, 8.4, 4.4$  Hz, 1H, C2H<sub>b</sub>), 3.19 (s, 3H, N8CH<sub>3</sub>), 2.46 (ddd,  $J = 14.2, 8.4, 4.7$  Hz, 1H, C3H<sub>a</sub>), 2.32 (ddd,  $J = 14.3, 5.7, 4.4$  Hz, 1H, C3H<sub>b</sub>), 2.04 (br-s, 3H, C2OH, C3aNH<sub>2</sub>).

$^{13}\text{C}$  NMR (125.8 MHz,  $\text{CDCl}_3$ , 20 °C):  $\delta$  179.1 (C8a), 145.2 (C7a), 130.6 (C6), 129.9 (C4a), 127.2 (C5), 119.0 (C4), 107.7 (C7), 62.0 (C3a), 58.9 (C2), 39.2 (C3), 26.6 (N8CH<sub>3</sub>).

FTIR (thin film)  $\text{cm}^{-1}$ : 3357 (br-m), 3284 (br-m), 2924 (w), 2883 (w), 1720 (s), 1605 (s), 1581 (m), 1456 (s), 1366 (m), 1288 (m), 1189 (w), 1101 (m), 1055 (m), 763 (m).

HRMS (ESI) ( $m/z$ ): calc'd for  $\text{C}_{11}\text{H}_{14}\text{BrN}_2\text{O}_2$  [ $\text{M}+\text{H}$ ]<sup>+</sup>: 285.0233, found: 285.0222.

$[\alpha]_{\text{D}}^{23}$ :  $-10$  ( $c = 0.91, \text{CH}_2\text{Cl}_2$ ).<sup>22</sup>

TLC (3% methanol in dichloromethane),  $R_f$ : 0.27 (UV, CAM).

22. The same optical rotation was observed when (–)-**S5** was prepared from the (*S*)-*tert*-butanesulfinamide analogue (compound (+)-**44** in Lathrop, S. P.; Pompeo, M.; Chang, W.-T. T.; Movassaghi, M. *J. Am. Chem. Soc.* **2016**, *138*, 7763), which confirms the absolute stereochemical configuration of (*S*)-2-(trimethylsilyl)ethanesulfinamide (–)-**26**. A representative procedure is as follows: A solution of hydrogen chloride in 1,4-dioxane (4.0 M, 81.0  $\mu\text{L}$ , 324  $\mu\text{mol}$ , 1.99 equiv) was added dropwise via syringe to a solution of the (*S*)-*tert*-butane sulfinamide derivative (63.3 mg, 163  $\mu\text{mol}$ , 1 equiv) in methanol (3.30 mL) at 23 °C. After 3.2 h, a saturated aqueous sodium bicarbonate solution (15 mL) and deionized water (5 mL) were added and the mixture was extracted with dichloromethane ( $3 \times 10$  mL). The combined organic extracts were washed with a saturated sodium chloride solution (20 mL), were dried over anhydrous sodium sulfate, were filtered, and were concentrated under reduced pressure. The resulting residue was purified by flash column chromatography on silica gel (eluent: 40% $\rightarrow$ 50% acetone in dichloromethane) to afford amino alcohol (–)-**S5** (16.7 mg, 35.9%) as a colorless film.  $[\alpha]_{\text{D}}^{23} = -10$  ( $c = 0.83, \text{CH}_2\text{Cl}_2$ ).



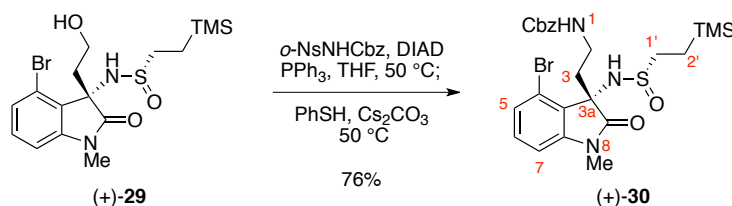

### Carbamate (+)-30:

Diisopropyl azodicarboxylate (DIAD, 3.10 mL, 15.7 mmol, 1.15 equiv) was added dropwise via syringe to a solution of alcohol (+)-29 (5.93 g, 13.7 mmol, 1 equiv), triphenylphosphine (4.13 g, 15.7 mmol, 1.15 equiv), and *N*-carbobenzyloxy-2-nitrobenzenesulfonamide (5.29 g, 13.4 mmol, 1.15 equiv) in tetrahydrofuran (91 mL) at 23 °C. The flask was fitted with a reflux condenser and was immersed in a preheated oil bath at 50 °C. After stirring for 1 h, the mixture was cooled to 23 °C and samples of cesium carbonate (17.8 g, 54.7 mmol, 4.00 equiv) and thiophenol (2.81 mL, 27.4 mmol, 2.00 equiv) were added. The flask was immersed in a preheated oil bath at 50 °C and the mixture was stirred vigorously for 1.5 h. The bright yellow suspension was then cooled to 23 °C, was diluted with deionized water (360 mL) and a saturated aqueous sodium chloride solution (90 mL), and was extracted with diethyl ether (3 × 230 mL). The combined organic extracts were washed successively with an aqueous sodium hydroxide solution (0.1 M, 350 mL) and a saturated aqueous sodium chloride solution (350 mL), were dried over anhydrous sodium sulfate, were filtered, and were concentrated under reduced pressure. The resulting residue was purified by flash column chromatography on silica gel (eluent: 10%→20% isopropanol in hexanes) to afford carbamate (+)-30 (5.90 g, 76.1%) as a white foam. Structural assignments were made using additional information from gCOSY, gHSQC, and gHMBC experiments.

<sup>1</sup>H NMR (500 MHz, CDCl<sub>3</sub>, 20 °C):

δ 7.37–7.27 (m, 5H, Ar<sub>Cbz</sub>H), 7.23–7.13 (m, 2H, C5H, C6H), 6.81–6.73 (m, 1H, C7H), 5.01 (d, *J* = 12.2 Hz, 1H, N1CO<sub>2</sub>CH<sub>a</sub>Ph), 4.96 (d, *J* = 12.3 Hz, 1H, N1CO<sub>2</sub>CH<sub>b</sub>Ph), 4.77–4.63 (m, 1H, N1H), 4.63–4.47 (m, 1H, NHSOalk), 3.16 (s, 3H, N8CH<sub>3</sub>), 3.12–2.93 (m, 2H, C2H<sub>2</sub>), 2.76–2.66 (m, 1H, C1'H<sub>a</sub>), 2.66–2.57 (m, 1H, C1'H<sub>b</sub>), 2.56–2.39 (m, 2H, C3H<sub>2</sub>), 0.91–0.78 (m, 2H, C2'H<sub>2</sub>), 0.02 (s, 9H, Si(CH<sub>3</sub>)<sub>3</sub>).

<sup>13</sup>C NMR (125.8 MHz, CDCl<sub>3</sub>, 20 °C):

δ 174.6 (C8a), 155.9 (N1CO<sub>2</sub>CH<sub>2</sub>Ar), 144.9 (C7a), 136.5 (Ar<sub>Cbz</sub>), 131.4 (C6), 128.6 (Ar<sub>Cbz</sub>), 128.29 (Ar<sub>Cbz</sub>), 128.26 (Ar<sub>Cbz</sub>), 127.5 (C5), 127.2 (C4a), 120.0 (C4), 108.1 (C7), 66.7 (N1CO<sub>2</sub>CH<sub>2</sub>Ar), 65.4 (C3a), 53.3 (C1'), 36.1 (C2), 35.5 (C3), 26.8 (N8CH<sub>3</sub>), 8.6 (C2'), –1.7 (Si(CH<sub>3</sub>)<sub>3</sub>).

FTIR (thin film) cm<sup>-1</sup>:

3396 (s), 3246 (s), 3032 (m), 2952 (s), 2890 (s), 1724 (br-s), 1604 (s), 1520 (s), 1457 (s), 1251 (s).

HRMS (DART) (*m/z*):

calc'd for C<sub>24</sub>H<sub>33</sub>BrN<sub>3</sub>O<sub>4</sub>SSi [M+H]<sup>+</sup>: 566.1139,  
 found: 566.1148.

[α]<sub>D</sub><sup>23</sup>:

+25 (*c* = 0.33, CH<sub>2</sub>Cl<sub>2</sub>).

TLC (15% isopropanol in hexanes), R<sub>f</sub>:

0.19 (UV, CAM).

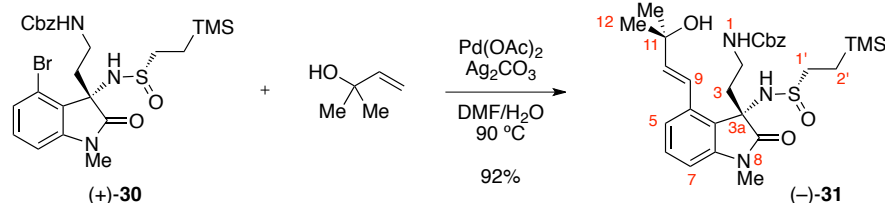

### **Allylic alcohol (–)-31:**

A pressure vessel was charged sequentially with carbamate (+)-**30** (5.89 g, 10.4 mmol, 1 equiv), silver(I) carbonate (5.73 g, 20.8 mmol, 2.00 equiv), palladium(II) acetate (350 mg, 1.56 mmol, 0.150 equiv), 1,1-dimethylallyl alcohol (21.7 mL, 208 mmol, 20.0 equiv), *N,N*-dimethylformamide (52 mL), and deionized water (52 mL). The resulting suspension was then degassed by vigorously sparging with argon for 15 min. The vessel was sealed with a Teflon screwcap and was immersed in a preheated oil bath at 90 °C. After vigorous stirring for 2 h, the black suspension was cooled to 23 °C and was diluted with diethyl ether (100 mL). The mixture was filtered through a pad of Celite and the filter cake was washed with diethyl ether (400 mL). The filtrate was washed with a saturated aqueous sodium chloride solution (450 mL) and the layers were separated. The aqueous layer was extracted with diethyl ether (3 × 180 mL) and the combined organic extracts were washed with a saturated aqueous sodium chloride solution (2 × 250 mL), were dried over anhydrous sodium sulfate, were filtered, and were concentrated under reduced pressure. The resulting residue was purified by flash column chromatography on silica gel (eluent: 30→80% acetonitrile in dichloromethane) to afford allylic alcohol (–)-**31** (5.43 g, 91.5%) as a pale-yellow foam. Structural assignments were made using additional information from gCOSY, gHSQC, gHMBC, and 1D selective NOESY experiments.

$^1\text{H}$  NMR (500 MHz,  $\text{CDCl}_3$ , 20 °C):

$\delta$  7.37–7.27 (m, 6H, C6H, ArCbzH), 7.23 (d,  $J = 8.0$  Hz, 1H, C5H), 7.12 (d,  $J = 15.9$  Hz, 1H, C9H), 6.71 (d,  $J = 7.7$  Hz, 1H, C7H), 6.36 (d,  $J = 15.9$  Hz, 1H, C10H), 5.00 (d,  $J = 12.2$  Hz, 1H, N1CO<sub>2</sub>CH<sub>a</sub>Ar), 4.97 (d,  $J = 12.2$  Hz, 1H, N1CO<sub>2</sub>CH<sub>b</sub>Ar), 4.64 (br-t,  $J = 5.8$  Hz, 1H, N1H), 4.35 (s, 1H, NHSOalk), 3.35 (s, 1H, OH), 3.17 (s, 3H, N8CH<sub>3</sub>), 2.98–2.86 (m, 1H, C2H<sub>a</sub>), 2.78–2.69 (m, 1H, C2H<sub>b</sub>), 2.68–2.54 (m, 3H, C3H<sub>a</sub>, C1'H<sub>2</sub>), 2.42–2.32 (m, 1H, C3H<sub>b</sub>), 1.44 (s, 3H, C12H<sub>3</sub>), 1.41 (s, 3H, C12H<sub>3</sub>), 0.86–0.73 (m, 2H, C2'H<sub>2</sub>), 0.00 (s, 9H, Si(CH<sub>3</sub>)<sub>3</sub>).

$^{13}\text{C}$  NMR (125.8 MHz,  $\text{CDCl}_3$ , 20 °C):

$\delta$  176.4 (C8a), 156.1 (N1CO<sub>2</sub>CH<sub>2</sub>Ar), 143.7 (C7a), 142.4 (C10), 136.6 (C4), 136.4 (ArCbz), 130.4 (C6), 128.6 (ArCbz), 128.23 (ArCbz), 128.21 (ArCbz), 123.5 (C4a), 122.3 (C9), 120.8 (C5), 107.5 (C7), 70.9 (C11), 66.7 (N1CO<sub>2</sub>CH<sub>2</sub>Ar), 63.9 (C3a), 53.0 (C1'), 36.9 (C3), 36.4 (C2), 29.7 (C12), 29.6 (C12), 26.7 (N8CH<sub>3</sub>), 9.3 (C2'), –1.8 (Si(CH<sub>3</sub>)<sub>3</sub>).

FTIR (thin film)  $\text{cm}^{-1}$ :

3319 (br-m), 3066 (w), 2969 (m), 1714 (br-s), 1590 (m), 1532 (br-m), 1465 (m), 1368 (m), 1251(s).

HRMS (ESI) ( $m/z$ ):

calc'd for C<sub>29</sub>H<sub>41</sub>N<sub>3</sub>NaO<sub>5</sub>SSi [M+Na]<sup>+</sup>: 594.2428, found: 594.2422.

$[\alpha]_D^{23}$ :  $-53$  ( $c = 0.6$ ,  $\text{CH}_2\text{Cl}_2$ ).

TLC (50% acetonitrile in dichloromethane),  $R_f$ : 0.33 (UV, CAM).

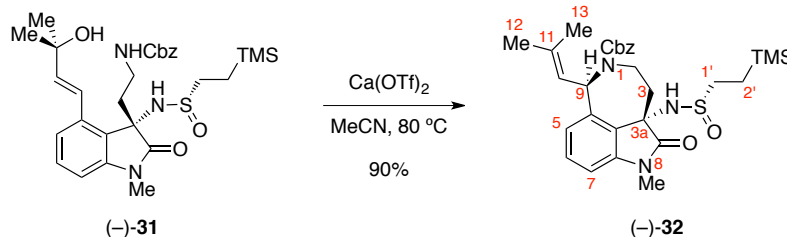

### Tricyclic oxindole (-)-**32**:

A sample of calcium trifluoromethanesulfonate (3.10 g, 9.18 mmol, 1.15 equiv) was added to a solution of allylic alcohol (-)-**31** (4.56 g, 7.98 mmol, 1 equiv) in acetonitrile (160 mL) at 23 °C. The reaction flask was fitted with a reflux condenser and was immersed in a preheated oil bath at 80 °C. After stirring for 36 h, the homogeneous yellow solution was cooled to 23 °C and was concentrated under reduced pressure. The residue was diluted with a saturated aqueous sodium bicarbonate solution (160 mL) and deionized water (40 mL) and the mixture was extracted with ethyl acetate (3 × 100 mL). The combined organic extracts were washed with a saturated aqueous sodium chloride solution (200 mL), were dried over anhydrous sodium sulfate, were filtered, and were concentrated under reduced pressure. The resulting residue was purified by flash column chromatography on silica gel (eluent: 18→30% acetonitrile in dichloromethane) to afford tricyclic oxindole (-)-**32** (3.97 g, 89.9%) as a white foam. As a result of slow conformational equilibration at ambient temperature, NMR spectra were collected at elevated temperature. Structural assignments were made using additional information from gCOSY, gHSQC, and gHMBC experiments collected at elevated temperature.

$^1\text{H}$  NMR (400 MHz, DMSO- $d_6$ , 100 °C):<sup>23</sup>

$\delta$  7.40–7.17 (m, 6H, Ar<sub>Cbz</sub>H<sub>5</sub>, C<sub>6</sub>H), 6.88 (app-d,  $J$  = 7.8 Hz, 2H, C<sub>5</sub>H, C<sub>7</sub>H), 6.19 (br-s, 1H, NH), 5.88 (br-d,  $J$  = 8.6 Hz, 1H, C<sub>9</sub>H), 5.77 (br-s, 1H, C<sub>10</sub>H), 5.02 (d,  $J$  = 12.6 Hz, 1H, N<sub>1</sub>CO<sub>2</sub>CH<sub>a</sub>Ph), 4.98 (d,  $J$  = 12.6 Hz, 1H, N<sub>1</sub>CO<sub>2</sub>CH<sub>b</sub>Ph), 3.88 (ddd,  $J$  = 14.6, 7.7, 3.9 Hz, 1H, C<sub>2</sub>H<sub>a</sub>), 3.68 (br-s, 1H, C<sub>2</sub>H<sub>b</sub>), 3.12 (s, 3H, N<sub>8</sub>CH<sub>3</sub>), 2.71–2.59 (m, 1H, C<sub>1'</sub>H<sub>a</sub>), 2.59–2.50 (m, 1H, C<sub>1'</sub>H<sub>b</sub>), 2.33–2.18 (m, 1H, C<sub>3</sub>H<sub>a</sub>), 1.80 (s, 3H, C<sub>12/13</sub>H<sub>3</sub>), 1.68 (s, 3H, C<sub>12/13</sub>H<sub>3</sub>), 1.59 (ddd,  $J$  = 14.5, 7.6, 4.8 Hz, 1H, C<sub>3</sub>H<sub>b</sub>), 0.77–0.65 (m, 2H, C<sub>2'</sub>H<sub>2</sub>), 0.00 (s, 9H, Si(CH<sub>3</sub>)<sub>3</sub>).

$^{13}\text{C}$  NMR (100.6 MHz, DMSO- $d_6$ , 90 °C):<sup>23</sup>

$\delta$  175.7 (C<sub>8a</sub>), 154.2 (N<sub>1</sub>CO<sub>2</sub>CH<sub>2</sub>Ph), 143.2 (C<sub>7a</sub>), 136.3 (2C, C<sub>4</sub>, Ar<sub>Cbz</sub>), 134.2 (C<sub>11</sub>), 128.6 (C<sub>6</sub>), 127.5 (Ar<sub>Cbz</sub>), 127.0 (Ar<sub>Cbz</sub>), 126.9 (Ar<sub>Cbz</sub>), 124.9 (C<sub>4a</sub>), 121.2 (C<sub>10</sub>), 119.9 (C<sub>5</sub>), 106.8 (C<sub>7</sub>), 65.6 (N<sub>1</sub>CO<sub>2</sub>CH<sub>2</sub>Ph), 61.8 (C<sub>3a</sub>), 57.1 (C<sub>9</sub>), 50.9 (C<sub>1'</sub>), 39.8 (C<sub>2</sub>), 31.4 (C<sub>3</sub>), 25.5 (N<sub>8</sub>CH<sub>3</sub>), 24.7 (C<sub>12/13</sub>), 17.5 (C<sub>12/13</sub>), 8.5 (C<sub>2'</sub>), -2.5 (Si(CH<sub>3</sub>)<sub>3</sub>).

FTIR (thin film) cm<sup>-1</sup>:

3229 (br-w), 2953 (m), 1706 (s), 1610 (m), 1599 (m), 1468 (m), 1418 (m), 1251 (m), 1050 (m).

HRMS (ESI) ( $m/z$ ):

calc'd for C<sub>29</sub>H<sub>40</sub>N<sub>3</sub>O<sub>4</sub>SSi [M+H]<sup>+</sup>: 554.2503,  
 found: 554.2497.

23. Acquisition of NMR spectra in DMSO- $d_6$  at 90 °C resulted in simplification of the spectra by convergence of the signals derived from various conformational isomers. However, we observed gradual sample decomposition during extended acquisition time.

$[\alpha]_{\text{D}}^{23}$ :  $-64$  ( $c = 0.22$ ,  $\text{CH}_2\text{Cl}_2$ ).

TLC (20% acetonitrile in dichloromethane),  $R_f$ : 0.23 (UV, CAM).

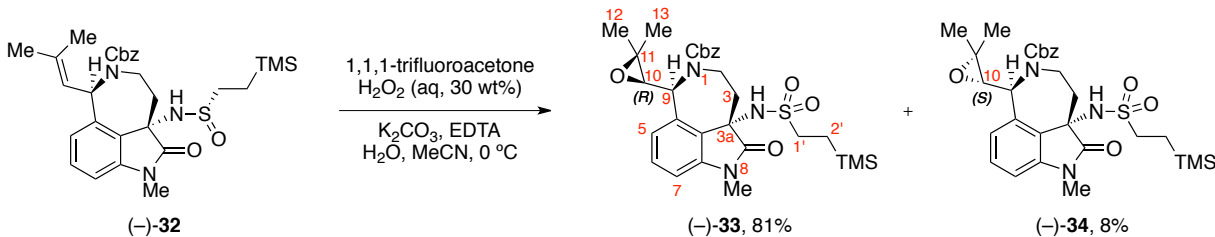

### **(10R)-Tricyclic epoxide (–)-33:**<sup>24</sup>

An aqueous potassium carbonate<sup>25</sup> solution (1.50 M in  $4.00 \times 10^{-4}$  M aqueous EDTA,<sup>26</sup> 4.50 mL) and an aqueous hydrogen peroxide solution<sup>27</sup> (30 wt%, 3.40 mL, 30.0 mmol, 10.0 equiv) were added successively to a solution of tricyclic oxindole (–)-32 (1.66 g, 3.00 mmol, 1 equiv) and 1,1,1-trifluoroacetone (282  $\mu$ L, 3.00 mmol, 1.00 equiv) in acetonitrile (4.50 mL) at 0 °C. After vigorous stirring at 0 °C for 7 h, an aqueous sodium thiosulfate solution (1 M, 90 mL) was added and the mixture was allowed to warm to 23 °C. The resulting suspension was extracted with ethyl acetate (3  $\times$  90 mL) and the combined organic extracts were washed with a saturated aqueous sodium chloride solution (180 mL), were dried over anhydrous sodium sulfate, were filtered, and were concentrated under reduced pressure. The residue was purified by flash column chromatography (eluent: 38%  $\rightarrow$  45% ethyl acetate in hexanes) to afford (10R)-tricyclic epoxide (–)-33 (1.43 g, 81.1%) as a white foam and the C10-epimer (–)-34 (140 mg, 7.95%) as a light yellow film. As a result of slow conformational equilibration at ambient temperature, NMR spectra were collected at elevated temperature. Structural assignments were made using additional information from gCOSY, gHSQC, and gHMBC experiments collected at elevated temperature.

### **(10R)-Tricyclic epoxide (–)-33:**

<sup>1</sup>H NMR (400 MHz, DMSO-*d*<sub>6</sub>, 130 °C):<sup>28</sup>

$\delta$  7.37–7.22 (m, 6H, C6H, Ar<sub>Cbz</sub>H), 7.02 (br-s, 1H, NH), 6.93–6.85 (m, 2H, C5H, C7H), 5.09 (d,  $J = 12.5$  Hz, 1H, N1CO<sub>2</sub>CH<sub>a</sub>Ph), 5.02 (d,  $J = 12.5$  Hz, 1H, N1CO<sub>2</sub>CH<sub>b</sub>Ph), 4.96 (br-d,  $J = 8.3$  Hz, 1H, C9H), 3.91 (ddd,  $J = 14.9, 7.6, 4.3$  Hz, 1H, C2H<sub>a</sub>), 3.85–3.67 (br-m, 1H, C2H<sub>b</sub>), 3.64–3.50 (br-m, 1H, C10H), 3.13 (s, 3H, N8CH<sub>3</sub>), 2.88–2.78 (m, 1H, C1'H<sub>a</sub>), 2.68–2.56 (m, 1H, C1'H<sub>b</sub>), 2.34 (app-dt,  $J = 14.3, 4.9$  Hz, 1H, C3H<sub>a</sub>), 1.62 (ddd,  $J = 14.6, 7.5, 5.3$  Hz, 1H, C3H<sub>b</sub>), 1.41 (s, 3H, C12/13H<sub>3</sub>), 1.35 (s, 3H, C12/13H<sub>3</sub>), 0.90–0.77 (m, 2H, C2'H), –0.02 (s, 9H, Si(CH<sub>3</sub>)<sub>3</sub>).

<sup>13</sup>C NMR (100.6 MHz, DMSO-*d*<sub>6</sub>, 130 °C):

$\delta$  174.5 (C8a), 154.5 (N1CO<sub>2</sub>CH<sub>2</sub>Ph), 143.3 (C7a), 136.6 (C4), 136.0 (Ar<sub>Cbz</sub>), 128.6 (C6), 127.4 (Ar<sub>Cbz</sub>), 126.8 (Ar<sub>Cbz</sub>), 126.7 (Ar<sub>Cbz</sub>), 124.9 (C4a), 118.8 (C5), 107.1 (C7), 65.9 (N1CO<sub>2</sub>CH<sub>2</sub>Ph), 61.2 (2C: C10, C3a),

24. All glassware used for the epoxidation reaction was carefully washed to remove trace metals, which may catalyze the decomposition of H<sub>2</sub>O<sub>2</sub>. Round-bottom flasks, Erlenmeyer flasks, and graduated cylinders used to prepare any component of the reaction mixture were washed successively with concentrated aqueous nitric acid, a saturated aqueous Na<sub>4</sub>EDTA solution, and acetone (three times each), rinsing with deionized water between each component.

25. Sigma-Aldrich, cat# 367877, 99.995% trace metal basis.

26. Sigma-Aldrich, cat# 431788, 99.995% trace metal basis.

27. Sigma-Aldrich, cat# 216763, 30 wt% in H<sub>2</sub>O with inhibitor (ACS reagent grade).

28. Acquisition of NMR spectra in DMSO-*d*<sub>6</sub> at 130 °C resulted in simplification of the spectra by convergence of the signals derived from various conformational isomers. However, we observed gradual sample decomposition with heating during extended acquisition time.

59.1 (C9), 58.1 (C11), 49.1 (C1'), 43.8 (br-s, C2), 32.0 (C3), 25.5 (N8CH<sub>3</sub>), 23.6 (C12/13), 18.0 (C12/13), 8.9 (C2'), -2.9 (Si(CH<sub>3</sub>)<sub>3</sub>).

FTIR (thin film) cm<sup>-1</sup>: 3218 (br-m), 2957 (m), 2899 (m), 1717 (s), 1702 (s), 1601 (m), 1467 (s), 1420 (s), 1368 (m), 1327 (s).

HRMS (ESI) (*m/z*): calc'd for C<sub>29</sub>H<sub>39</sub>N<sub>3</sub>NaO<sub>6</sub>SSi [M+Na]<sup>+</sup>: 608.2221, found: 608.2217.

[α]<sub>D</sub><sup>23</sup>: -87 (*c* = 0.22, CH<sub>2</sub>Cl<sub>2</sub>).

TLC (50% ethyl acetate in hexanes), R<sub>f</sub>: 0.32 (UV, CAM).

**(10S)-Tricyclic epoxide (-)-34:**

<sup>1</sup>H NMR (400 MHz, CD<sub>3</sub>CN, 70 °C): δ 7.44–7.15 (m, 7H), 6.97–6.83 (m, 1H), 5.75 (br-s, 1H), 5.08 (d, *J* = 12.2 Hz, 1H), 5.00 (d, *J* = 12.6 Hz, 1H), 4.75 (br-s, 1H), 4.02 (br-s, 1H), 3.84 (ddd, *J* = 14.4, 9.4, 2.8 Hz, 2H), 3.15 (s, 3H), 2.77 (td, *J* = 13.5, 4.7 Hz, 1H), 2.45 (td, *J* = 13.6, 4.2 Hz, 1H), 2.18 (br-d, *J* = 14.2 Hz, 1H), 1.68 (ddd, *J* = 14.5, 9.8, 4.9 Hz, 1H), 1.45 (s, 3H), 1.33 (s, 3H), 0.85 (td, *J* = 13.6, 4.6 Hz, 1H), 0.74 (td, *J* = 13.7, 4.2 Hz, 1H), -0.03 (s, 9H).

<sup>13</sup>C NMR (100.6 MHz, CD<sub>3</sub>CN, 70 °C): δ 177.5, 156.9, 146.3, 140.6, 138.4, 131.2, 129.9, 129.4 (2C), 126.3, 121.3, 109.6, 68.5, 63.9, 63.0 (br), 61.5, 60.1, 52.5, 48.1 (br), 34.3, 27.7, 25.5, 20.4, 11.0, -1.5.

FTIR (thin film) cm<sup>-1</sup>: 3208 (br-w), 2956 (w), 2900 (w), 1709 (s), 1606 (m), 1474 (m), 1416 (m), 1367 (m), 1323 (s), 1251 (s).

HRMS (ESI) (*m/z*): calc'd for C<sub>29</sub>H<sub>40</sub>N<sub>3</sub>O<sub>6</sub>SSi [M+H]<sup>+</sup>: 586.2402, found: 586.2403.

[α]<sub>D</sub><sup>23</sup>: -70 (*c* = 0.83, CH<sub>2</sub>Cl<sub>2</sub>).

TLC (50% ethyl acetate in hexanes), R<sub>f</sub>: 0.44 (UV, CAM).

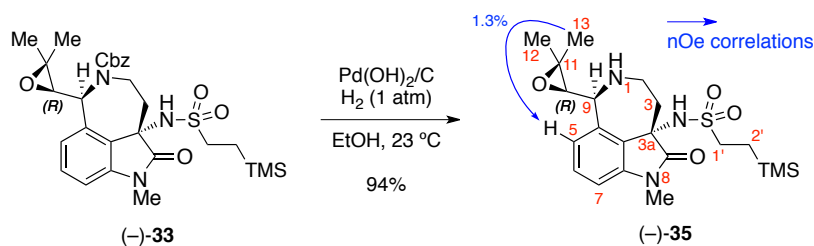

### **(10*R*)-Tetracyclic amine (–)-35:**

A sample of palladium(II) hydroxide on carbon (15.7 wt% on wet support, 12.0 mg, 13.4  $\mu\text{mol}$ , 0.0785 equiv) was added to a solution of (10*R*)-tricyclic epoxide (–)-33 (100 mg, 171  $\mu\text{mol}$ , 1 equiv) in anhydrous ethanol (200 proof, 3.40 mL) at 23  $^\circ\text{C}$ . The resulting suspension was sparged with dihydrogen for 5 min by discharge of a balloon equipped with a needle extending into the reaction mixture. After stirring for 2 h under an atmosphere of dihydrogen, the suspension was sparged with dinitrogen for 5 min and was diluted with ethyl acetate (7 mL). The mixture was then filtered through a plug of Celite and the filter cake was washed with ethyl acetate (15 mL). The colorless filtrate was concentrated under reduced pressure and the residue was purified by flash column chromatography on silica gel (eluent: 40 $\rightarrow$ 50% acetone in dichloromethane) to afford (10*R*)-tetracyclic amine (–)-35 (72.4 mg, 93.9%) as a white foam. As a result of slow conformational equilibration at ambient temperature, NMR spectra were collected at elevated temperature. Structural assignments were made using additional information from gCOSY, gHSQC, gHMBC, and 1D selective NOESY experiments also collected at elevated temperature.

$^1\text{H}$  NMR (400 MHz,  $\text{C}_6\text{D}_6$ , 70  $^\circ\text{C}$ ):

$\delta$  7.07 (t,  $J = 7.9$  Hz, 1H, C6H), 6.68 (d,  $J = 7.9$  Hz, 1H, C5H), 6.41 (d,  $J = 7.8$  Hz, 1H, C7H), 4.22 (d,  $J = 8.7$  Hz, 1H, C9H), 3.06–2.95 (m, 3H, C2H<sub>a</sub>, C1'H<sub>2</sub>), 2.92 (s, 3H, N8CH<sub>3</sub>), 2.87 (d,  $J = 8.8$  Hz, 1H, C10H), 2.83 (app-dt,  $J = 14.3, 6.0$  Hz, 1H, C2H<sub>b</sub>), 2.14 (app-dt,  $J = 14.1, 6.2$  Hz, 1H, C3H<sub>a</sub>), 1.36 (app-dt,  $J = 14.1, 5.9$  Hz, 1H, C3H<sub>b</sub>), 1.25 (s, 3H, C12/13H<sub>3</sub>), 1.24 (s, 3H, C12/13H<sub>3</sub>), 1.17–1.10 (m, 2H, C2'H<sub>2</sub>), –0.09 (s, 9H, Si(CH<sub>3</sub>)<sub>3</sub>).

$^{13}\text{C}$  NMR (100.6 MHz,  $\text{C}_6\text{D}_6$ , 70  $^\circ\text{C}$ ):

$\delta$  175.3 (C8a), 144.3 (C7a), 138.7 (C4), 129.6 (C6), 128.8 (C4a), 119.5 (C5), 107.4 (C7), 65.4 (C10), 63.2 (C3a), 60.2 (C11), 59.5 (C9), 52.1 (C1'), 42.3 (C2), 36.2 (C3), 26.4 (N8CH<sub>3</sub>), 24.9 (C12/13), 19.4 (C12/13), 10.9 (C2'), –2.0 (Si(CH<sub>3</sub>)<sub>3</sub>).

FTIR (thin film)  $\text{cm}^{-1}$ :

3228 (br-w), 2955 (m), 1721 (s), 1606 (m), 1470 (m), 1327 (s), 1251 (m), 1148 (m).

HRMS (DART) ( $m/z$ ):

calc'd for  $\text{C}_{21}\text{H}_{34}\text{N}_3\text{O}_4\text{SSi}$   $[\text{M}+\text{H}]^+$ : 452.2034,  
 found: 452.2036.

$[\alpha]_{\text{D}}^{23}$ :

–66 ( $c = 0.49$ ,  $\text{CH}_2\text{Cl}_2$ ).

TLC (50% acetone in dichloromethane),  $R_f$ :

0.35 (UV, CAM).



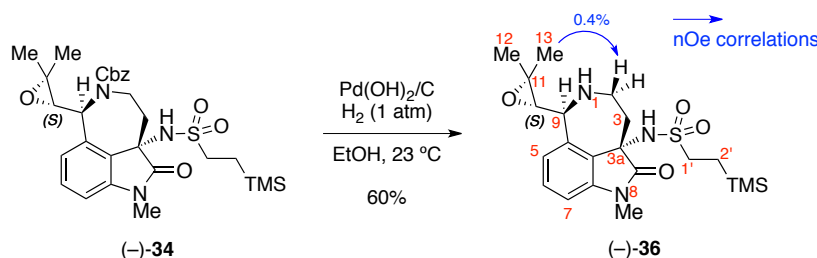

### **(10*S*)-Tetracyclic amine (–)-36:**

A sample of palladium(II) hydroxide on carbon (15.7 wt% on wet support, 3.2 mg, 3.6  $\mu\text{mol}$ , 0.080 equiv) was added to a solution of (10*S*)-tricyclic epoxide (–)-34 (26.6 mg, 45.4  $\mu\text{mol}$ , 1 equiv) in anhydrous ethanol (200 proof, 900  $\mu\text{L}$ ) at 23 °C. The resulting suspension was sparged with dihydrogen for 5 min by discharge of a balloon equipped with a needle extending into the reaction mixture. After stirring for 2 h under an atmosphere of dihydrogen, the suspension was sparged with dinitrogen for 5 min and was diluted with ethyl acetate (3 mL). The mixture was then filtered through a plug of Celite and the filter cake was washed with ethyl acetate (10 mL). The colorless filtrate was concentrated under reduced pressure and the resulting residue was purified by flash column chromatography on silica gel (eluent: 50% acetone in dichloromethane) to afford (10*S*)-tetracyclic amine (–)-36 (12.3 mg, 60.1%) as a colorless film. Crystals suitable for X-ray diffraction were obtained by layer diffusion of *n*-heptane into a solution of (–)-36 in dichloromethane at 0 °C. The thermal ellipsoid representation of (–)-36 is depicted later in this document. As a result of slow conformational equilibration at ambient temperature, NMR spectra were collected at elevated temperature. Structural assignments were made using additional information from gCOSY, gHSQC, gHMBC, and 1D selective NOESY experiments also collected at elevated temperature.

$^1\text{H}$  NMR (400 MHz,  $\text{C}_6\text{D}_6$ , 60 °C):

$\delta$  7.28 (app-dt,  $J = 7.9, 0.9$  Hz, 1H, C5H), 7.08 (t,  $J = 7.9$  Hz, 1H, C6H), 6.38 (d,  $J = 7.8$  Hz, 1H, C7H), 6.28 (br-s, 1H,  $\text{NHSO}_2$ ), 4.18 (d,  $J = 9.2$  Hz, 1H, C9H), 3.52 (ddd,  $J = 14.5, 11.6, 2.7$  Hz, 1H, C2H<sub>a</sub>), 3.02 (ddd,  $J = 14.9, 4.2, 3.3$  Hz, 1H, C2H<sub>b</sub>), 2.95 (app-td,  $J = 13.3, 4.8$  Hz, 1H, C1'H<sub>a</sub>), 2.92 (s, 3H, N8CH<sub>3</sub>), 2.84 (d,  $J = 9.2$  Hz, 1H, C10H), 2.60 (app-td,  $J = 13.4, 4.0$  Hz, 1H, C1'H<sub>b</sub>), 2.21 (app-dt,  $J = 14.3, 2.9$  Hz, 1H, C3H<sub>a</sub>), 1.34 (s, 3H, C13H<sub>3</sub>), 1.23 (s, 3H, C12H<sub>3</sub>), 1.17 (ddd,  $J = 14.4, 11.7, 4.2$  Hz, 1H, C3H<sub>b</sub>), 1.01 (app-td,  $J = 13.8, 4.7$  Hz, 1H, C2'H<sub>a</sub>), 0.92 (app-td,  $J = 13.7, 4.0$  Hz, 1H, C2'H<sub>b</sub>), –0.12 (s, 9H, Si(CH<sub>3</sub>)<sub>3</sub>).

$^{13}\text{C}$  NMR (100.6 MHz,  $\text{C}_6\text{D}_6$ , 60 °C):

$\delta$  177.2 (C8a), 145.1 (C7a), 144.0 (C4), 129.9 (C6), 126.6 (C4a), 119.0 (C5), 107.6 (C7), 64.5 (C10), 63.3 (C3a), 58.5 (C2, C11, C9), 51.7 (C1'), 46.8 (C2), 35.7 (C3), 26.7 (N8CH<sub>3</sub>), 25.1 (C12), 19.4 (C13), 10.1 (C2'), –2.1 (Si(CH<sub>3</sub>)<sub>3</sub>).

FTIR (thin film)  $\text{cm}^{-1}$ :

3209 (br-m), 2954 (m), 1714 (s), 1605 (s), 1471 (m), 1422 (m), 1367 (m), 1327 (s), 1252 (m), 1151 (m).

HRMS (ESI) ( $m/z$ ):

calc'd for  $\text{C}_{21}\text{H}_{34}\text{N}_3\text{O}_4\text{SSi}$  [ $\text{M}+\text{H}$ ]<sup>+</sup>: 452.2034,  
 found: 452.2032.

$[\alpha]_{\text{D}}^{24}$ :  $-67$  ( $c = 0.62$ ,  $\text{CH}_2\text{Cl}_2$ ).

TLC (50% acetone in dichloromethane),  $R_f$ : 0.24 (UV, CAM).

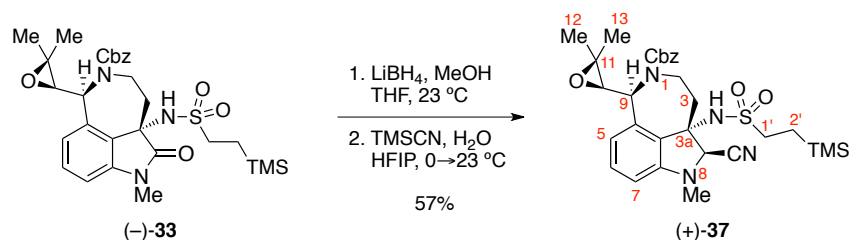

### Aminonitrile (+)-37:

A solution of lithium borohydride (2.0 M in tetrahydrofuran, 3.8 mL, 7.6 mmol, 15 equiv) was added dropwise via syringe over 2 min to a solution of oxindole (–)-**33** (293 mg, 0.500 mmol, 1 equiv) in tetrahydrofuran (6.70 mL) at 23 °C. Methanol (1.21 mL, 30.0 mmol, 60.0 equiv) was then added dropwise over 3 h by syringe pump and the resulting white suspension was allowed to stir vigorously at 23 °C. After 17 h, the mixture was cooled to 0 °C and was diluted with a saturated aqueous ammonium chloride solution (50 mL) and water (20 mL). After vigorous stirring at 23 °C for 10 min, the mixture was extracted with ethyl acetate (3 × 30 mL). The combined organic extracts were washed with a saturated aqueous sodium chloride solution (60 mL), were dried over anhydrous sodium sulfate, were filtered, and were concentrated under reduced pressure to provide the crude hemiaminal as a white foam, which was used directly in the next step without further purification.

*CAUTION! Trimethylsilyl cyanide is very toxic and should only be used with great caution.*<sup>29</sup>

Trimethylsilyl cyanide (375 μL, 3.00 mmol, 6.00 equiv) was added dropwise over 2 min to a solution of the crude hemiaminal and water (81.0 μL, 4.50 mmol, 9.00 equiv) in hexafluoroisopropanol (HFIP, 3.30 mL) at 0 °C. After 10 min, the reaction flask was sealed under an argon atmosphere with a Teflon-lined glass stopper and the ice bath was removed. After 20 h, the solution was cooled to 0 °C and was diluted with an aqueous sodium hydroxide solution (0.5 M, 20 mL). After warming to 23 °C, the mixture was extracted with dichloromethane (3 × 20 mL). The combined organic extracts were washed with a saturated aqueous sodium chloride solution (40 mL), were dried over anhydrous sodium sulfate, were filtered, and were concentrated under reduced pressure. The resulting residue was purified by flash column chromatography on silica gel (eluent: 20→24% ethyl acetate in hexanes) to afford aminonitrile (+)-**37** (171 mg, 57.3%) as a white foam. As a result of slow conformational equilibration at ambient temperature, NMR spectra were collected at elevated temperature.

<sup>1</sup>H NMR (500 MHz, CD<sub>3</sub>CN, 70 °C): δ 7.58–7.06 (m, 6H), 6.71 (br-d, *J* = 7.0 Hz, 1H), 6.68 (d, *J* = 7.9 Hz, 1H), 5.40–4.82 (m, 5H), 4.16 (app br-s, 1H), 3.94–3.77 (m, 1H), 3.40 (app br-s, 1H), 3.07–2.97 (m, 1H), 2.95 (s, 3H), 2.90 (ddd, *J* = 14.0, 10.4, 7.5 Hz, 1H), 2.86–2.78 (m, 1H), 2.58 (ddd, *J* = 15.0, 9.9, 5.8 Hz, 1H), 1.41 (s, 3H), 1.37 (s, 3H), 1.01–0.90 (m, 2H), 0.05 (s, 9H).

<sup>13</sup>C NMR (125.8 MHz, CD<sub>3</sub>CN, 70 °C): δ 157.3, 153.1, 139.8, 138.4, 132.5, 129.8, 129.2, 129.0, 127.7, 119.2, 117.0, 109.7, 68.6 (2C), 68.5, 64.3, 61.2, 61.0, 53.1, 44.6, 35.8, 34.0, 25.1, 20.2, 11.4, –1.5.

FTIR (thin film) cm<sup>-1</sup>: 3248 (br-w), 2956 (w), 1694 (m), 1596 (m), 1453 (m), 1419 (s), 1324 (s), 1250 (s), 1143 (s), 1119 (s), 991 (m), 840 (s), 744 (s), 697 (s), 540 (m).

29. All operations involving trimethylsilyl cyanide were carried out in a well-ventilated fume hood. This includes but is not limited to: measuring the reagent, execution of the transformation, work-up of the reaction mixture, and concentration of the crude reaction mixture.

HRMS (DART) ( $m/z$ ): calc'd for  $C_{30}H_{41}N_4O_5SSi$   $[M+H]^+$ : 597.2561,  
found: 597.2560.

$[\alpha]_D^{24}$ : +60 ( $c = 0.98$ ,  $CH_2Cl_2$ ).

TLC (22% ethyl acetate in hexanes),  $R_f$ : 0.17 (UV, CAM).

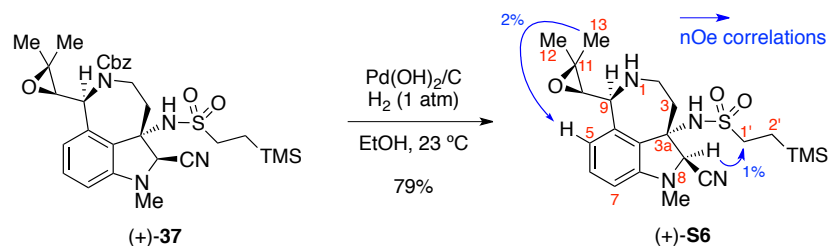

### Azepane (+)-S6:

A sample of palladium(II) hydroxide on carbon (15.7 wt% on wet support, 2.0 mg, 1.7  $\mu\text{mol}$ , 0.10 equiv) was added to a solution of aminonitrile (+)-**37** (10 mg, 16.8  $\mu\text{mol}$ , 1 equiv) in anhydrous ethanol (200 proof, 0.84 mL) at 23  $^\circ\text{C}$ . The resulting black suspension was sparged with dihydrogen for 5 min by discharge of a balloon equipped with a needle extending into the reaction mixture. After stirring for 2 h under an atmosphere of dihydrogen, the suspension was sparged with argon for 5 min and was diluted with ethyl acetate (5 mL). The mixture was then filtered through a plug of Celite and the filter cake was washed with ethyl acetate (15 mL). The colorless filtrate was concentrated under reduced pressure and the resulting residue was purified by flash column chromatography on silica gel (eluent: 40 $\rightarrow$ 45% ethyl acetate in hexanes) to afford azepane (+)-**S6** (6.2 mg, 79.4%) as a colorless oil. Structural assignments were made using additional information from gCOSY, gHSQC, gHMBC, and 1D selective NOESY experiments.

$^1\text{H}$  NMR (500 MHz,  $\text{CDCl}_3$ , 20  $^\circ\text{C}$ ):

$\delta$  7.20 (t,  $J = 7.8$  Hz, 1H, C6H), 6.53 (d,  $J = 7.8$  Hz, 1H, C7H), 6.50 (app-dt,  $J = 7.7, 0.7$  Hz, 1H, C5H), 5.33 (s, 3H, C8aH), 3.86 (d,  $J = 9.9$  Hz, 1H, C9H), 3.60 (ddd,  $J = 13.3, 7.4, 2.2$  Hz, 1H, C2H<sub>a</sub>), 3.39 (ddd,  $J = 13.3, 10.5, 7.1$  Hz, 1H, C2H<sub>b</sub>), 3.02 (d,  $J = 9.4$  Hz, 1H, C10H), 2.92 (s, 3H, N8CH<sub>3</sub>), 2.91–2.83 (m, 2H, C1'H<sub>2</sub>), 2.75 (ddd,  $J = 14.3, 7.1, 2.1$  Hz, 1H, C3H<sub>a</sub>), 2.48 (ddd,  $J = 14.2, 10.5, 7.3$  Hz, 1H, C3H<sub>b</sub>), 1.49 (s, 3H, C13H<sub>3</sub>), 1.41 (s, 3H, C12H<sub>3</sub>), 1.07–0.96 (m, 1H, C2'H<sub>a</sub>), 0.92–0.79 (m, 1H, C2'H<sub>b</sub>), –0.02 (s, 9H, Si(CH<sub>3</sub>)<sub>3</sub>)

$^{13}\text{C}$  NMR (125.8 MHz,  $\text{CDCl}_3$ , 25  $^\circ\text{C}$ ):

$\delta$  150.8 (C7a), 139.2 (C4), 130.7 (C6), 129.5 (C4a), 117.9 (C5), 115.5 (CN), 107.9 (C7), 67.2 (C3a), 64.9 (C10), 64.7 (C8a), 60.6 (C11), 59.4 (C9), 52.2 (C1'), 40.8 (C2), 36.4 (C3), 33.1 (N8CH<sub>3</sub>), 25.0 (C12), 20.0 (C13), 10.5 (C2'), –1.9 (Si(CH<sub>3</sub>)<sub>3</sub>).

FTIR (thin film)  $\text{cm}^{-1}$ :

3248 (br-w), 2955 (m), 1595 (m), 1451 (m), 1329 (s), 1251 (s), 1143 (s), 968 (w), 905 (m), 843 (s).

HRMS (ESI) ( $m/z$ ):

calc'd for  $\text{C}_{22}\text{H}_{35}\text{N}_4\text{O}_3\text{SSi}$  [ $\text{M}+\text{H}$ ]<sup>+</sup>: 463.2194,  
 found: 463.2195.

$[\alpha]_{\text{D}}^{24}$ :

+141 ( $c = 0.31$ ,  $\text{CH}_2\text{Cl}_2$ ).

TLC (40% ethyl acetate in hexanes),  $R_f$ :

0.15 (UV, CAM).

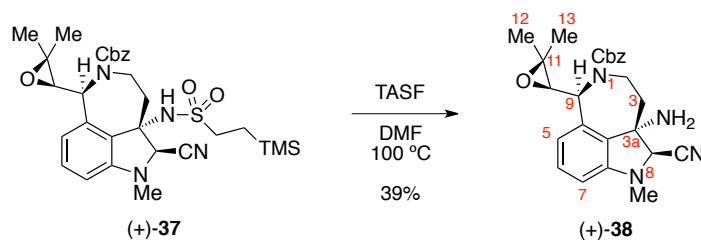

### **Benzylic aminonitrile (+)-38:**

A sample of aminonitrile (+)-37 (45.0 mg, 75.4  $\mu\text{mol}$ , 1 equiv) contained in a 5-mL Schlenk flask (Kjeldahl shape) was azeotropically dried by concentration from anhydrous benzene ( $3 \times 1\text{ mL}$ ). After drying under high vacuum for 2.5 h, the flask was refilled with argon and was charged with a sample of tris(dimethylamino)sulfonium difluorotrimethylsilicate (TASF, 83.1 mg, 302  $\mu\text{mol}$ , 4.00 equiv). The mixture was dissolved in *N,N*-dimethylformamide (1.00 mL) and the resulting homogeneous solution was stirred at 23  $^\circ\text{C}$  for 10 min. The flask was then sealed and was immersed in a preheated oil bath at 100  $^\circ\text{C}$ . After stirring at this temperature for 9 h, the light-brown solution was cooled to 23  $^\circ\text{C}$  and was diluted with a saturated aqueous sodium chloride solution (20 mL) and water (5 mL) and the yellow suspension was extracted with ethyl acetate ( $3 \times 10\text{ mL}$ ). The combined organic extracts were washed with a saturated aqueous sodium chloride solution ( $2 \times 20\text{ mL}$ ), were dried over anhydrous sodium sulfate, were filtered, and were concentrated under reduced pressure. The resulting residue was purified by flash column chromatography on silica gel (eluent: 50 $\rightarrow$ 65% ethyl acetate in hexanes) to afford benzylic aminonitrile (+)-38 (12.8 mg, 39.2%) as a pale-yellow film. As a result of the slow conformational equilibration at ambient temperature, NMR spectra were collected at elevated temperature. Structural assignments were made using additional information from gCOSY, gHSQC, and gHMBC experiments also collected at elevated temperature.

$^1\text{H}$  NMR (400 MHz,  $\text{CD}_3\text{CN}$ , 70  $^\circ\text{C}$ ):

$\delta$  7.40–7.22 (br-m, 5H,  $\text{Ar}_{\text{Cbz}}\text{H}$ ), 7.20 (t,  $J = 7.8\text{ Hz}$ , 1H, C6H), 6.67 (d,  $J = 7.3\text{ Hz}$ , 1H, C5H), 6.60 (d,  $J = 7.9\text{ Hz}$ , 1H, C7H), 5.10 (d,  $J = 12.6\text{ Hz}$ , 1H,  $\text{N1CO}_2\text{CH}_a\text{Ph}$ ), 5.08 (d,  $J = 12.6\text{ Hz}$ , 1H,  $\text{N1CO}_2\text{CH}_b\text{Ph}$ ), 4.94 (d,  $J = 8.8\text{ Hz}$ , 1H, C9H), 4.29 (s, 1H, C8aH), 4.06 (ddd,  $J = 14.8, 10.5, 4.6\text{ Hz}$ , 1H, C2H<sub>a</sub>), 3.92–3.81 (m, 1H, C2H<sub>b</sub>), 3.60–3.40 (br-m, 1H, C10H), 2.91 (s, 3H, N8CH<sub>3</sub>), 2.47 (ddd,  $J = 14.1, 10.3, 5.6\text{ Hz}$ , 1H, C3H<sub>a</sub>), 2.21 (ddd,  $J = 14.1, 4.8, 3.7\text{ Hz}$ , 1H, C3H<sub>b</sub>), 1.37 (s, 3H, C12/13H<sub>3</sub>), 1.33 (s, 3H, C12/13H<sub>3</sub>).

$^{13}\text{C}$  NMR (100.6 MHz,  $\text{CD}_3\text{CN}$ , 70  $^\circ\text{C}$ ):

$\delta$  157.4 ( $\text{N1CO}_2\text{CH}_2\text{Ph}$ ), 151.8 (C7a), 139.0 (C4), 138.7 ( $\text{Ar}_{\text{Cbz}}$ ), 132.2 (C4a), 131.1 (C6), 129.8 ( $\text{Ar}_{\text{Cbz}}$ ), 129.2 ( $\text{Ar}_{\text{Cbz}}$ ), 129.0 ( $\text{Ar}_{\text{Cbz}}$ ), 118.8 (C5), 117.6 (CN), 109.2 (C7), 72.9 (C8a), 68.3 ( $\text{N1CO}_2\text{CH}_2\text{Ph}$ ), 65.2 (C3a), 64.0 (C10), 61.7 (C9), 60.7 (C11), 45.4 (C2), 36.9 (C3), 34.1 (N8CH<sub>3</sub>), 25.2 (C12/13), 19.9 (C12/13).

FTIR (thin film)  $\text{cm}^{-1}$ :

3371 (br-w), 3309 (br-w), 2960 (w), 1698 (s), 1597 (m), 1465 (m), 1419 (m), 1329 (m), 1259 (m), 747 (m).

HRMS (DART) ( $m/z$ ):

calc'd for  $\text{C}_{25}\text{H}_{29}\text{N}_4\text{O}_3$  [ $\text{M}+\text{H}$ ] $^+$ : 433.2234,  
 found: 433.2239.

$[\alpha]_{\text{D}}^{23}$ :

+65 ( $c = 0.55$ ,  $\text{CH}_2\text{Cl}_2$ ).

TLC (60% ethyl acetate in hexanes),  $R_f$ :

0.13 (UV, CAM).

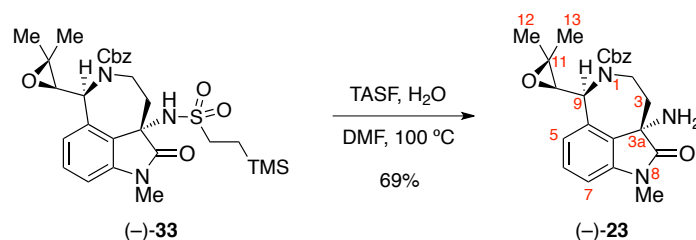

### **Benzylic amine (–)-23:**

A sample of tris(dimethylamino)sulfonium difluorotrimethylsilicate (TASF, 3.99 g, 14.5 mmol, 3.20 equiv) was added as a solid to a pressure flask containing a solution of tricyclic epoxide (–)-**33** (2.65 g, 4.52 mmol, 1 equiv) and deionized water (82.0  $\mu$ L, 4.52 mmol, 1.00 equiv) in *N,N*-dimethylformamide (30.0 mL) at 23 °C. The reaction vessel was sealed with a Teflon screwcap under an argon atmosphere and was immersed in a preheated oil bath at 100 °C. After 19 h, the reaction mixture was cooled to 23 °C, was diluted with a saturated aqueous sodium chloride solution (300 mL) and deionized water (50 mL) and was extracted with diethyl ether (5  $\times$  200 mL). The combined organic extracts were washed with a saturated aqueous sodium chloride solution (3  $\times$  400 mL), were dried over anhydrous sodium sulfate, were filtered, and were concentrated under reduced pressure. The resulting residue was purified by flash column chromatography on silica gel (eluent: 40% ethyl acetate, 4% triethylamine, 56% hexanes  $\rightarrow$  44% ethyl acetate, 4% triethylamine, 52% hexanes) to afford benzylic amine (–)-**23** (1.31 g, 68.7%) as a light-yellow foam. As a result of the slow conformational equilibration at ambient temperature, NMR spectra were collected at elevated temperature. Structural assignments were made using additional information from gCOSY, gHSQC, and gHMBC experiments also collected at elevated temperature.

$^1\text{H}$  NMR (400 MHz, DMSO- $d_6$ , 130 °C):  $\delta$  7.35–7.19 (m, 6H, C6H, Ar<sub>Cbz</sub>H), 6.93–6.82 (m, 2H, C5H, C7H), 5.09–4.95 (m, 3H, N1CO<sub>2</sub>CH<sub>2</sub>Ph, C9H), 3.94 (ddd,  $J$  = 14.4, 8.8, 3.9 Hz, 1H, C2H<sub>a</sub>), 3.83 (app-dt,  $J$  = 14.5, 5.0 Hz, 1H, C2H<sub>b</sub>), 3.66 (d,  $J$  = 8.6 Hz, 1H, C10H), 3.13 (s, 3H, N8CH<sub>3</sub>), 1.96 (ddd,  $J$  = 14.1, 5.2, 3.9 Hz, 1H, C3H<sub>a</sub>), 1.85 (br-s, 2H, C3aNH<sub>2</sub>), 1.54 (ddd,  $J$  = 13.9, 8.7, 4.8 Hz, 1H, C3H<sub>b</sub>), 1.40 (s, 3H, C12/13H<sub>3</sub>), 1.27 (s, 3H, C12/13H<sub>3</sub>).

$^{13}\text{C}$  NMR (100.6 MHz, DMSO- $d_6$ , 130 °C):  $\delta$  178.5 (C8a), 154.5 (N1CO<sub>2</sub>CH<sub>2</sub>Ph), 142.6 (C7a), 136.7 (C4), 136.1 (Ar<sub>Cbz</sub>), 128.6 (C4a), 127.7 (C6), 127.3 (Ar<sub>Cbz</sub>), 126.8 (Ar<sub>Cbz</sub>), 126.7 (Ar<sub>Cbz</sub>), 118.6 (C5), 106.7 (C7), 65.6 (N1CO<sub>2</sub>CH<sub>2</sub>Ph), 60.9 (C10), 59.3 (C9), 58.6 (C3a), 57.7 (C11), 44.7 (C2), 32.2 (C3), 25.1 (N8CH<sub>3</sub>), 23.6 (C12/13), 17.8 (C12/13).

FTIR (thin film)  $\text{cm}^{-1}$ : 3360 (w), 3288 (w), 2962 (m), 1710 (s), 1608 (s), 1473 (s), 1417 (m), 1368 (m), 1301 (m), 1260 (m).

HRMS (ESI) ( $m/z$ ): calc'd for C<sub>24</sub>H<sub>28</sub>N<sub>3</sub>O<sub>4</sub> [M+H]<sup>+</sup>: 422.2074, found: 422.2079.

$[\alpha]_D^{23}$ : –111 ( $c$  = 1.14, CH<sub>2</sub>Cl<sub>2</sub>).

TLC (60% ethyl acetate in hexanes),  $R_f$ : 0.20 (UV, CAM).

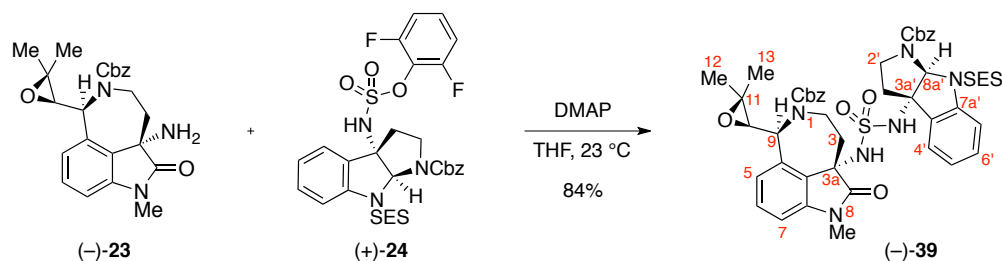

### Sulfamide (–)-39:

A sample of 4-(dimethylamino)pyridine (DMAP, 386 mg, 3.16 mmol, 1.10 equiv) was added to a solution of benzylic amine (–)-23 (1.21 g, 2.88 mmol, 1 equiv) and sulfamate ester (+)-24 (2.87 g, 4.31 mmol, 1.50 equiv) in tetrahydrofuran (11.5 mL) at 23 °C. After 24 h, the homogeneous solution was diluted with a saturated aqueous ammonium sulfate solution (80 mL) and deionized water (20 mL) and the resulting mixture was extracted with ethyl acetate (3 × 100 mL). The combined organic extracts were washed with a saturated aqueous sodium chloride solution (200 mL), were dried over anhydrous sodium sulfate, were filtered, and were concentrated under reduced pressure. The residue was purified by flash column chromatography on silica gel (eluent: 45%→50% ethyl acetate in hexanes) to afford sulfamide (–)-39 (2.32 g, 84.3%) as a white foam. As a result of the slow conformational equilibration at ambient temperature, NMR spectra were collected at elevated temperature.

$^1\text{H}$  NMR (400 MHz,  $\text{C}_6\text{D}_6$ , 70 °C):<sup>30</sup>

$\delta$  7.59–7.24 (m, 6H), 7.13–6.99 (m, 6H), 6.94 (t,  $J = 7.8$  Hz, 2H), 6.80 (t,  $J = 7.6$  Hz, 1H), 6.55 (s, 1H), 6.50–6.20 (m, 2H), 5.16 (d,  $J = 12.2$  Hz, 1H), 5.08 (d,  $J = 12.1$  Hz, 1H), 4.97 (br-s, 3H), 3.77 (br-s, 1H), 3.69–3.46 (m, 2H), 3.38–3.21 (m, 1H), 3.15 (s, 3H), 2.52 (td,  $J = 11.6, 5.4$  Hz, 1H), 2.33–1.80 (m, 3H), 1.61–0.99 (m, 10H), –0.10 (s, 9H).

$^{13}\text{C}$  NMR (100.6 MHz,  $\text{C}_6\text{D}_6$ , 70 °C):<sup>30</sup>

$\delta$  176.6, 156.2 (br), 155.0, 144.9, 143.6, 137.6, 137.0, 132.1, 130.1, 129.7 (br), 128.8 (2C), 128.6, 128.5 (2C), 127.9, 125.3, 124.5, 120.8, 117.2, 108.1, 83.3, 73.1, 67.8, 67.7, 62.9 (br), 59.1 (br), 51.5, 45.6, 36.5, 32.9, 26.8, 24.9, 19.4, 10.6, –2.0.

FTIR (thin film)  $\text{cm}^{-1}$ :

3415 (br-w), 3222 (br-w), 2956 (w), 1707 (s), 1602 (m), 1465 (m), 1412 (m), 1346 (m), 1317 (m), 1253 (m), 1198 (m), 1150 (m), 1102 (m), 753 (m).

HRMS (ESI) ( $m/z$ ):

calc'd for  $\text{C}_{47}\text{H}_{57}\text{N}_6\text{O}_{10}\text{S}_2\text{Si}$  [ $\text{M}+\text{H}$ ]<sup>+</sup>: 957.3341, found: 957.3353.

$[\alpha]_{\text{D}}^{23}$ :

–37 ( $c = 0.37$ ,  $\text{CH}_2\text{Cl}_2$ ).

TLC (50% ethyl acetate in hexanes),  $R_f$ :

0.30 (UV, CAM).

30. Atropisomerism causes significant signal broadening and not all  $^1\text{H}$  and  $^{13}\text{C}$  resonances were observed. All expected signals were observed in the product of the next step of our synthesis, aminonitrile sulfamide (+)-40.



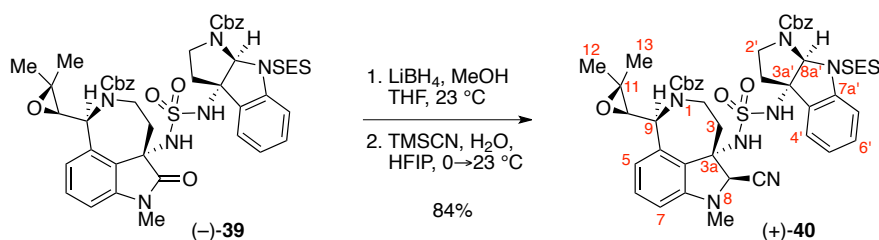

### **Aminonitrile sulfamide (+)-40:**

A solution of lithium borohydride (2.0 M in tetrahydrofuran, 15 mL, 30 mmol, 15 equiv) was added over 5 min to a solution of sulfamide (–)-**39** (1.91 g, 2.00 mmol, 1 equiv) in tetrahydrofuran (27.0 mL) at 23 °C. Methanol (4.85 mL, 120 mmol, 60.0 equiv) was then added dropwise by syringe pump over 3.5 h and the resulting white suspension was allowed to stir vigorously at 23 °C. After 17 h, the mixture was cooled to 0 °C and was diluted with a saturated aqueous ammonium chloride solution (200 mL) and deionized water (50 mL). After vigorous stirring at 23 °C for 10 min, the mixture was extracted with ethyl acetate (3 × 150 mL). The combined organic extracts were washed with a saturated aqueous sodium chloride solution (200 mL), were dried over anhydrous sodium sulfate, were filtered, and were concentrated under reduced pressure to provide the crude hemiaminal as a white foam, which was used directly in the next step without further purification.

*CAUTION! Trimethylsilyl cyanide is very toxic and should only be used with great caution.*<sup>29</sup> Trimethylsilyl cyanide (1.50 mL, 12.0 mmol, 6.00 equiv) was added dropwise to a solution of the crude hemiaminal and deionized water (324 μL, 18.0 mmol, 9.00 equiv) in hexafluoroisopropanol (HFIP, 13.3 mL) at 0 °C. After 5 min, the reaction flask was sealed under an argon atmosphere with a Teflon-lined glass stopper and the ice-bath was removed. After 20 h, the solution was cooled to 0 °C and was diluted with an aqueous sodium hydroxide solution (0.1 M, 133 mL) and a saturated aqueous sodium chloride solution (133 mL). After warming to 23 °C, the mixture was extracted with dichloromethane (3 × 130 mL). The combined organic extracts were dried over anhydrous sodium sulfate, were filtered, and were concentrated under reduced pressure. The resulting residue was purified by flash column chromatography on silica gel (eluent: 16% ethyl acetate, 42% hexanes, 42% dichloromethane → 20% ethyl acetate, 40% hexanes, 40% dichloromethane) to afford aminonitrile sulfamide (+)-**40** (1.62 g, 83.6%) as a white foam. As a result of the slow conformational equilibration at ambient temperature, NMR spectra were collected at elevated temperature.

<sup>1</sup>H NMR (500 MHz, C<sub>6</sub>D<sub>6</sub>, 70 °C):

δ 7.49 (d, *J* = 8.2 Hz, 1H), 7.35 (br-d, *J* = 5.7 Hz, 1H), 7.26 (d, *J* = 7.3 Hz, 2H), 7.23–7.16 (br-m, 2H), 7.15–6.98 (m, 8H), 6.93 (t, *J* = 7.5 Hz, 1H), 6.85–6.59 (br-m, 1H), 6.50 (br-s, 1H), 6.26 (d, *J* = 7.9 Hz, 1H), 5.36 (br-s, 1H), 5.20 (s, 1H), 5.09 (s, 2H), 5.04 (s, 2H), 4.96–3.99 (br-m, 2H), 3.82–3.52 (m, 3H), 3.43 (td, *J* = 14.1, 13.6, 4.6 Hz, 1H), 3.32–2.75 (br-m, 2H), 2.74–2.42 (m, 6H), 2.25–2.14 (m, 1H), 1.38–1.09 (m, 5H), 1.02 (s, 3H), –0.07 (s, 9H).

<sup>13</sup>C NMR (100.6 MHz, C<sub>6</sub>D<sub>6</sub>, 70 °C):

δ 157.4, 154.9, 152.1, 143.8, 138.8, 137.3, 137.0, 131.9 (br), 131.4, 130.5, 128.8, 128.7, 128.4, 128.3, 128.2, 127.9 (br), 127.2, 125.0, 124.9 (br), 118.4 (br), 118.2, 115.6, 108.7, 83.4, 72.6, 68.2, 67.8, 67.6, 66.6, 63.4, 59.8, 59.4 (br), 50.9, 45.3, 41.1 (br), 36.5 (br), 33.6 (br), 33.0, 24.4, 19.9, 10.6, –1.9.

FTIR (thin film)  $\text{cm}^{-1}$ : 3246 (br-w), 2956 (w), 2896 (w), 1708 (m), 1600 (m), 1414 (m), 1357 (m), 1252 (m), 1149 (m).

HRMS (ESI) ( $m/z$ ): calc'd for  $\text{C}_{48}\text{H}_{57}\text{N}_7\text{NaO}_9\text{S}_2\text{Si}$   $[\text{M}+\text{Na}]^+$ : 990.3321, found: 990.3312.

$[\alpha]_{\text{D}}^{24}$ : +69 ( $c = 0.47$ ,  $\text{CH}_2\text{Cl}_2$ ).

TLC (19% ethyl acetate, 41% hexanes, 41% dichloromethane),  $R_f$ : 0.29 (UV, CAM).

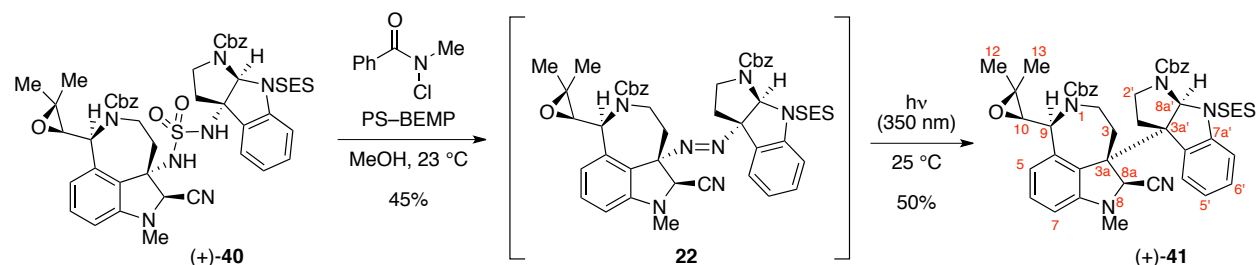

### Heterodimer (+)-41:

*N*-Chloro-*N*-methylbenzamide<sup>31</sup> (672 mg, 3.96 mmol, 6.00 equiv) and resin-bound 2-*tert*-butylimino-2-diethylamino-1,3-dimethyl-perhydro-1,3,2-diazaphosphorine (PS-BEMP, 3.62 g, 2.19 mmol/g on 200-400 mesh polystyrene resin, 7.92 mmol, 12.0 equiv) were added in rapid succession to a solution of aminonitrile sulfamide (+)-**40** (639 mg, 660  $\mu$ mol, 1 equiv) in methanol (66.0 mL) at 23 °C in the dark. After 15 min, the suspension was filtered through a pad of Celite, and the filter cake was washed sequentially with dichloromethane (70 mL) and ethyl acetate (70 mL). The light yellow filtrate was concentrated under reduced pressure and the resulting residue was purified by flash column chromatography on silica gel (eluent: 6% ethyl acetate, 47% hexanes, 47% dichloromethane  $\rightarrow$  10% ethyl acetate, 45% hexanes, 45% dichloromethane) to afford unsymmetrical diazene **22** (270 mg, 45.3%) as a light yellow foam,<sup>32</sup> which was used directly in the next step without further purification.

A solution of diazene **22** (268 mg, 297  $\mu$ mol, 1 equiv) in dichloromethane (20 mL) was concentrated under reduced pressure in a 500-mL round-bottom flask to provide a thin film of the diazene coating the flask. The flask was evacuated and backfilled with argon (three cycles) and was then irradiated in a Rayonet photoreactor equipped with 14 radially distributed ( $r = 12.7$  cm) 25 W lamps ( $\lambda = 350$  nm) at 25 °C. After irradiating for 3 h, the lamps were turned off and the resulting residue was purified by flash column chromatography on silica gel (eluent: 10% ethyl acetate, 60% hexanes, 30% dichloromethane  $\rightarrow$  10% ethyl acetate, 45% hexanes, 45% dichloromethane) to afford heterodimer (+)-**41** (129 mg, 49.6%) as an off-white film. As a result of the slow conformational equilibration at ambient temperature, NMR spectra were collected at elevated temperature. Structural assignments were made using additional information from gCOSY, gHSQC, and gHMBC experiments also collected at elevated temperature.

<sup>1</sup>H NMR (500 MHz, CD<sub>3</sub>CN, 70 °C):

$\delta$  7.56–7.45 (br-m, 1H, C4'**H**), 7.43–7.18 (m, 13H, C6**H**, C6'**H**, C7**H**, C7'**H**, Ar<sub>Cbz</sub>**H**), 7.10 (br-t,  $J = 7.4$  Hz, 1H, C5'**H**), 6.65 (app-dt,  $J = 7.8, 0.9$  Hz, 1H, C7**H**), 6.59 (app-dt,  $J = 7.9, 1.0$  Hz, 1H, C5**H**), 5.61 (s, 1H, C8a'**H**), 5.43 (d,  $J = 8.7$  Hz, 1H, C9**H**), 5.36–4.97 (br-m, 2H, N1CO<sub>2</sub>CH<sub>2</sub>), 4.92 (d,  $J = 12.6$  Hz, 1H, N1'CO<sub>2</sub>CH<sub>a</sub>), 4.89 (d,  $J = 12.6$  Hz, 1H, N1'CO<sub>2</sub>CH<sub>b</sub>), 4.06 (dddd,  $J = 14.4, 3.8, 2.6, 1.0$  Hz, 1H, C2**H**<sub>a</sub>), 3.79 (s, 1H, C8a**H**), 3.50–3.38 (br-m, 1H, C2'**H**<sub>a</sub>), 3.36 (ddd,  $J = 14.6, 12.6, 2.3$  Hz, 1H, C2**H**<sub>b</sub>),

31. The reagent was prepared as follows using a procedure adapted from Lengyel, I.; Cesare, V.; Stephani, R. *Synth. Commun.* **1998**, *28*, 1891: *tert*-Butyl hypochlorite (3.68 mL, 32.5 mmol, 1.30 equiv) was added dropwise via syringe to a stirred solution of *N*-methylbenzamide (3.38 g, 25.0 mmol, 1 equiv) in dichloromethane (50.0 mL) at 0 °C in the dark. After 10 min, the ice-bath was removed and the pale-yellow solution was allowed to stir at 23 °C in the dark. After 67 h, the solution was concentrated under reduced pressure. The resulting residue was purified by flash column chromatography on silica gel (eluent: 15  $\rightarrow$  20% diethyl ether in pentane) to yield *N*-chloro-*N*-methylbenzamide (3.97 g, 93.5%) as a pale-yellow oil. Spectral data were consistent with those reported in Lathrop, S. P.; Pompeo, M.; Chang, W.-T. T.; Movassaghi, M. *J. Am. Chem. Soc.* **2016**, *138*, 7763.

32. As a result of the sensitivity of this intermediate, its slow conformational equilibrium at ambient temperature, and its instability at elevated temperatures, diazene **22** was used immediately in the next step. The measured HRMS was consistent with the desired product; HRMS (ESI) ( $m/z$ ): calc'd for C<sub>48</sub>H<sub>55</sub>N<sub>7</sub>NaO<sub>7</sub>SSi [M+Na]<sup>+</sup>: 924.3545, found: 924.3542.

3.22–3.09 (m, 2H, N8'SO<sub>2</sub>CH<sub>2</sub>), 3.09–2.90 (br-m, 1H, C3H<sub>a</sub>), 2.86 (d, *J* = 8.7 Hz, 1H, C10H), 2.74 (s, 3H, N8CH<sub>3</sub>), 2.44–2.24 (br-m, 1H, C2'H<sub>b</sub>), 2.12 (app-dt, *J* = 15.5, 2.5 Hz, 1H, C3H<sub>b</sub>), 1.89–1.62, (br-m, 2H, C3'H<sub>2</sub>), 1.56 (br-s, 3H, C12/13H<sub>3</sub>), 1.38 (s, 3H, C12/13H<sub>3</sub>), 1.10–0.99 (m, 1H, N8'SO<sub>2</sub>CH<sub>2</sub>CH<sub>a</sub>), 0.93 (app-td, *J* = 13.6, 5.0 Hz, 1H, N8'SO<sub>2</sub>CH<sub>2</sub>CH<sub>b</sub>), –0.01 (s, 9H, Si(CH<sub>3</sub>)<sub>3</sub>).

<sup>13</sup>C NMR (125.8 MHz, CD<sub>3</sub>CN, 70 °C):

δ 156.8 (N1CO<sub>2</sub>), 155.3 (N1'CO<sub>2</sub>), 154.0 (C7a), 145.0 (C7a'), 138.7 (C4), 138.4 (ArC<sub>bz</sub>), 138.0 (ArC<sub>bz</sub>), 132.0 (C6), 131.4 (C4a'), 130.9 (C6'), 130.3 (C4'), 129.9 (ArC<sub>bz</sub>), 129.7 (ArC<sub>bz</sub>), 129.6 (ArC<sub>bz</sub>), 129.2 (ArC<sub>bz</sub>), 129.1 (ArC<sub>bz</sub>), 126.3 (C4a), 126.0 (ArC<sub>bz</sub>), 124.8 (C5'), 120.1 (C5), 117.7 (CN), 116.1 (C7'), 109.5 (C7), 82.1 (C8a'), 70.7 (C8a), 68.4 (N1CO<sub>2</sub>CH<sub>2</sub>), 68.1 (N1'CO<sub>2</sub>CH<sub>2</sub>), 67.1 (C10), 67.0 (C3a'), 62.2 (C11), 59.3 (C9), 58.8 (C3a), 52.7 (N8'SO<sub>2</sub>CH<sub>2</sub>), 45.7 (C2'), 43.0 (C2), 36.1 (C3'), 35.1 (br, C3), 34.9 (N8CH<sub>3</sub>), 24.9 (C12/13), 20.0 (C12/13), 10.9 (N8'SO<sub>2</sub>CH<sub>2</sub>CH<sub>2</sub>), –1.6 (Si(CH<sub>3</sub>)<sub>3</sub>).

FTIR (thin film) cm<sup>-1</sup>:

3064 (w), 2956 (w), 2893 (w), 1700 (s), 1599 (w), 1413 (m), 1353 (m), 1113 (s), 860 (m), 732 (s).

HRMS (ESI) (*m/z*):

calc'd for C<sub>48</sub>H<sub>56</sub>N<sub>5</sub>O<sub>7</sub>SSi [M+H]<sup>+</sup>: 874.3664,  
found: 874.3661.

[α]<sub>D</sub><sup>23</sup>:

+214 (*c* = 0.70, CH<sub>2</sub>Cl<sub>2</sub>).

TLC (10% ethyl acetate, 60% hexanes, 30% dichloromethane), R<sub>f</sub>: 0.13 (UV, CAM).

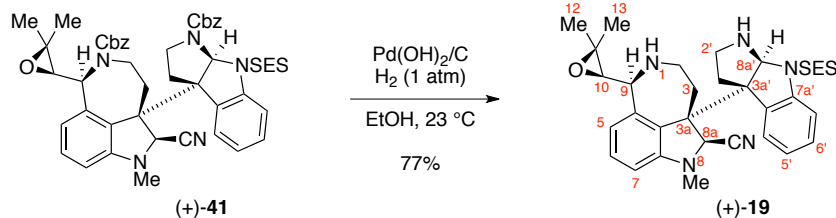

### Heterodimeric diamine (+)-19:

A sample of palladium(II) hydroxide on carbon (15.7 wt% on wet support, 79.1 mg, 88.5  $\mu\text{mol}$ , 0.600 equiv) was added to a solution of heterodimer (+)-41 (129 mg, 148  $\mu\text{mol}$ , 1 equiv) in anhydrous ethanol (200 proof, 5.90 mL) at 23  $^\circ\text{C}$ . The resulting suspension was sparged with dihydrogen for 5 min by discharge of a balloon equipped with a needle extending into the reaction mixture. After stirring for 6 h under an atmosphere of dihydrogen, the suspension was sparged with argon for 5 min, was diluted with ethanol (6 mL), and was filtered through a pad of Celite. The filter cake was washed with ethanol (60 mL) and the colorless filtrate was concentrated under reduced pressure. The resulting residue was purified by flash column chromatography on silica gel (eluent: 40 $\rightarrow$ 60% acetonitrile in dichloromethane) to afford heterodimeric diamine (+)-19 (68.9 mg, 77.1%) as a white film. Structural assignments were made using additional information from gCOSY, gHSQC, gHMBC, and 1D selective NOESY experiments.

$^1\text{H}$  NMR (500 MHz,  $\text{CD}_3\text{OD}$ , 20  $^\circ\text{C}$ ):

$\delta$  7.47 (d,  $J = 7.6$  Hz, 1H, C4'H), 7.38–7.30 (m, 3H, C6'H, C6'H, C7'H), 7.09 (ddd,  $J = 8.2, 6.2, 2.3$  Hz, 1H, C5'H), 6.79 (d,  $J = 7.7$  Hz, 1H, C5'H), 6.70 (d,  $J = 7.9$  Hz, 1H, C7'H), 5.65 (s, 1H, C8a'H), 4.15–4.09 (m, 2H, C8a'H, C9'H), 3.42–3.32 (m, 2H, N8'SO<sub>2</sub>CH<sub>2</sub>), 3.18 (d,  $J = 8.1$  Hz, 1H, C10'H), 3.16–3.02 (m, 2H, C2'H<sub>2</sub>), 2.84 (s, 3H, N8CH<sub>3</sub>), 2.82–2.78 (m, 1H, C2'H<sub>a</sub>), 2.74–2.64 (m, 1H, C3'H<sub>a</sub>), 2.54 (dd,  $J = 10.9, 3.9$  Hz, 1H, C3'H<sub>a</sub>), 2.23 (app-td,  $J = 11.5, 3.9$  Hz, 1H, C2'H<sub>b</sub>), 2.17–2.04 (m, 2H, C3'H<sub>b</sub>, C3'H<sub>b</sub>), 1.49 (s, 3H, C12/13H<sub>3</sub>), 1.33 (s, 3H, C12/13H<sub>3</sub>), 1.14 (ddd,  $J = 13.9, 10.9, 6.6$  Hz, 1H, N8'SO<sub>2</sub>CH<sub>2</sub>CH<sub>a</sub>), 1.01 (ddd,  $J = 13.9, 11.2, 6.7$  Hz, 1H, N8'SO<sub>2</sub>CH<sub>2</sub>CH<sub>b</sub>), 0.01 (s, 9H, Si(CH<sub>3</sub>)<sub>3</sub>).

$^{13}\text{C}$  NMR (125.8 MHz,  $\text{CD}_3\text{OD}$ , 20  $^\circ\text{C}$ ):

$\delta$  153.2 (C7a), 144.9 (C7a'), 136.3 (C4), 132.0 (C6), 131.9 (C4a'), 130.8 (C6'), 128.5 (C4a), 127.5 (C4'), 123.9 (C5'), 117.7 (C5), 117.2 (CN), 113.7 (C7'), 109.3 (C7), 85.6 (C8a'), 67.9 (C8a), 67.2 (C10), 66.5 (C3a'), 60.2 (C11), 58.2 (C3a), 57.1 (C9), 51.6 (N8'SO<sub>2</sub>CH<sub>2</sub>), 46.9 (C2'), 43.9 (C2), 39.0 (C3'), 34.3 (C3), 32.8 (N8CH<sub>3</sub>), 24.9 (C12/13), 19.9 (C12/13), 10.3 (N8'SO<sub>2</sub>CH<sub>2</sub>CH<sub>2</sub>), -2.1 (Si(CH<sub>3</sub>)<sub>3</sub>).

FTIR (thin film)  $\text{cm}^{-1}$ :

3346 (br-w), 2955 (m), 2878 (w), 2227 (w), 1588 (m), 1476 (m), 1459 (m), 1347 (m), 1250 (m), 1149 (m).

HRMS (ESI) ( $m/z$ ):

calc'd for C<sub>32</sub>H<sub>44</sub>N<sub>5</sub>O<sub>3</sub>SSi [M+H]<sup>+</sup>: 606.2929,  
 found: 606.2929.

$[\alpha]_{\text{D}}^{23}$ :

+262 ( $c = 0.13$ , CH<sub>2</sub>Cl<sub>2</sub>).

TLC (50% acetonitrile in dichloromethane), R<sub>f</sub>: 0.36 (UV, CAM).



3H, C2''H<sub>3</sub>\*), 1.93 (dd,  $J = 13.1, 6.4$  Hz, 1H, C3'H<sub>b</sub>), 1.57 (s, 3H, C13H<sub>3</sub>\*), 1.53 (s, 3H, C13H<sub>3</sub>), 1.38 (s, 3H, C12H<sub>3</sub>), 1.36 (s, 3H, C12H<sub>3</sub>\*), 1.31–1.13 (m, 4H, N8'SO<sub>2</sub>CH<sub>2</sub>CH<sub>2</sub>, N8'SO<sub>2</sub>CH<sub>2</sub>CH<sub>2</sub>\*), 0.10 (s, 9H, Si(CH<sub>3</sub>)<sub>3</sub>\*), 0.06 (s, 9H, Si(CH<sub>3</sub>)<sub>3</sub>).

<sup>13</sup>C NMR (125.8 MHz, CDCl<sub>3</sub>, 21 °C, 5.9:1 mixture of atropisomers, \*denotes minor atropisomer):

δ 171.8 (C1''), 170.5 (C1''\*), 149.9 (C7a), 149.5 (C7a\*), 139.2 (C4a\*), 139.0 (C4\*), 138.3 (C4a'), 137.2 (C4), 136.1 (2C, C7a', C7a''), 131.2 (2C, C4a, C4a\*), 129.4 (C6), 129.2 (C6\*), 127.1 (C6'), 127.7 (C6'\*), 126.8 (C5'\*), 126.4 (C5'), 125.4 (C7'\*), 124.9 (C7'), 124.3 (C4'\*), 123.9 (C4'), 114.6 (C5\*), 113.9 (C5), 102.6 (C7), 102.3 (C7\*), 85.3 (C8a\*), 84.7 (C8a), 80.0 (C8a'), 78.2 (C8a'\*), 65.5 (C9), 65.2 (C9\*), 63.9 (2C, C10, C10\*), 59.9 (2C, C11, C11\*), 54.2 (2C, C3a, C3a\*), 52.5 (2C, C3a', N8'SO<sub>2</sub>CH<sub>2</sub>\*), 51.8 (N8'SO<sub>2</sub>CH<sub>2</sub>), 50.3 (C3a'\*), 45.9 (C2'\*), 44.2 (C2'), 38.0 (C3\*), 37.9 (C2\*), 37.7 (C3), 36.6 (C2), 33.3 (C3'\*), 31.7 (C3'), 31.0 (N8CH<sub>3</sub>\*), 30.9 (N8CH<sub>3</sub>), 24.9 (C12), 24.8 (C12\*), 23.1 (C2''\*), 22.8 (C2''), 20.6 (C13), 20.5 (C13\*), 10.8 (N8'SO<sub>2</sub>CH<sub>2</sub>CH<sub>2</sub>\*), 10.7 (N8'SO<sub>2</sub>CH<sub>2</sub>CH<sub>2</sub>), -1.7 (Si(CH<sub>3</sub>)<sub>3</sub>\*), -1.8 (Si(CH<sub>3</sub>)<sub>3</sub>).

FTIR (thin film) cm<sup>-1</sup>:

3055 (w), 2954 (m), 2928 (m), 2880 (m), 1651 (s), 1598 (m), 1487 (m), 1454 (m), 1400 (s), 1341 (s), 1281 (m), 1250 (m), 1207 (m), 1155 (s), 1081 (m), 1054 (m), 859 (m), 843 (m), 740 (m), 568 (m).

HRMS (ESI) ( $m/z$ ):

calc'd for C<sub>33</sub>H<sub>45</sub>N<sub>4</sub>O<sub>4</sub>SSi [M+H]<sup>+</sup>: 621.2925,  
found: 621.2916.

[α]<sub>D</sub><sup>24</sup>:

-144 ( $c = 0.81$ , CH<sub>2</sub>Cl<sub>2</sub>).

TLC (30% acetone in hexanes), R<sub>f</sub>:

0.13 (UV, CAM).

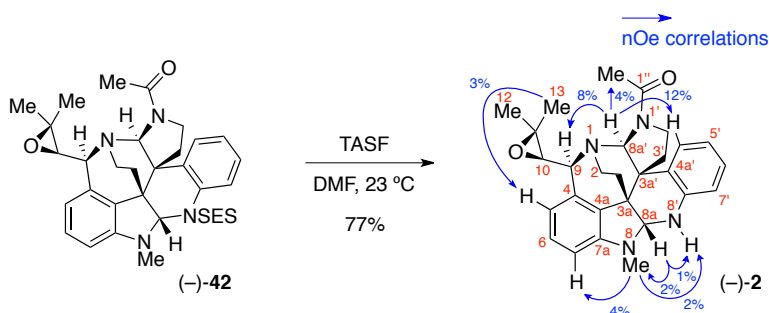

### **(-)-Communesin A (2):**

A degassed solution of tris(dimethylamino)sulfonium difluorotrimethylsilicate (TASF, 24.3 mg, 88.0  $\mu\text{mol}$ , 4.00 equiv) in *N,N*-dimethylformamide (235  $\mu\text{L}$ ) was added to a degassed solution of (-)-*N*8'-(trimethylsilyl)ethanesulfonyl communesin A (**42**, 13.6 mg, 22.0  $\mu\text{mol}$ , 1 equiv) in *N,N*-dimethylformamide (500  $\mu\text{L}$ ) at 23  $^{\circ}\text{C}$ . After 2.7 h, a saturated aqueous sodium chloride solution (10 mL) and deionized water (5 mL) were added and the mixture was extracted with ethyl acetate ( $3 \times 8$  mL). The combined organic extracts were washed with a saturated aqueous sodium chloride solution ( $2 \times 15$  mL), were dried over anhydrous sodium sulfate, were filtered, and were concentrated under reduced pressure. The resulting residue was purified by flash column chromatography on silica gel (eluent: 40% acetone in hexanes) to afford (-)-communesin A (**2**, 7.74 mg, 77.0%) as a white solid. Structural assignments were made using additional information from gCOSY, gHSQC, gHMBC, and 1D selective NOESY experiments.

$^1\text{H}$  NMR (600 MHz,  $\text{CDCl}_3$ , 20  $^{\circ}\text{C}$ , 11:1 mixture of atropisomers, \*denotes minor atropisomer):

$\delta$  7.01 (app-td,  $J = 7.4, 1.9$  Hz, 2H, C6'H, C6'H\*), 6.88 (t,  $J = 7.7$  Hz, 2H, C6H, C6H\*), 6.74–6.66 (m, 5H, C4'H, C5'H, C5'H\*, C7'H, C7'H\*), 6.63 (d,  $J = 7.4$  Hz, 1H, C4'H\*), 6.10 (d,  $J = 7.4$  Hz, 1H, C5H\*), 6.06 (d,  $J = 7.7$  Hz, 1H, C5H), 5.95 (d,  $J = 7.7$  Hz, 1H, C7H), 5.91 (d,  $J = 7.4$  Hz, 1H, C7H\*), 5.41 (app-s, 1H, C8a'H\*), 5.02 (d,  $J = 1.5$  Hz, 1H, C8a'H), 4.69 (s, 1H, C8aH), 4.67 (s, 1H, C8aH\*), 4.59 (br-s, 1H, N8'H), 4.53–4.47 (m, 1H, C9H\*), 4.08 (d,  $J = 9.1$  Hz, 1H, C9H), 3.89 (app-dd,  $J = 11.8, 8.4$  Hz, 1H, C2'H<sub>a</sub>), 3.77–3.66 (m, 1H, C2'H<sub>a</sub>\*), 3.60–3.51 (m, 1H, C2H<sub>a</sub>\*), 3.47 (app-dd,  $J = 15.7, 9.6$  Hz, 1H, C2H<sub>a</sub>), 3.36 (app-dt,  $J = 16.3, 8.8$  Hz, 2H, C2H<sub>b</sub>, C2H<sub>b</sub>\*), 3.13 (app-q,  $J = 9.9$  Hz, 1H, C2'H<sub>b</sub>\*), 3.01 (app-td,  $J = 11.6, 7.2$  Hz, 1H, C2'H<sub>b</sub>), 2.97–2.90 (m, 1H, C3'H<sub>a</sub>\*), 2.87 (d,  $J = 8.9$  Hz, 1H, C10H), 2.84 (s, 3H, N8CH<sub>3</sub>), 2.82 (s, 3H, N8CH<sub>3</sub>\*), 2.80 (d,  $J = 8.5$  Hz, 1H, C10H\*), 2.78–2.70 (m, 1H, C3'H<sub>a</sub>), 2.37 (app-dd,  $J = 12.5, 7.7$  Hz, 2H, C3H<sub>a</sub>, C3H<sub>a</sub>\*), 2.33 (s, 3H, C2''H<sub>3</sub>), 2.28 (app-dt,  $J = 13.0, 9.3$  Hz, 2H, C3H<sub>b</sub>, C3H<sub>b</sub>\*), 2.09 (s, 3H, C2''H<sub>3</sub>\*), 2.07–2.02 (m, 1H, C3'H<sub>b</sub>\*), 1.97 (app-dd,  $J = 13.3, 7.1$  Hz, 1H, C3'H<sub>b</sub>), 1.58 (s, 3H, C13H<sub>3</sub>\*), 1.53 (s, 3H, C13H<sub>3</sub>), 1.38 (s, 3H, C12H<sub>3</sub>), 1.37 (s, 3H, C12H<sub>3</sub>\*).



$^{13}\text{C}$  NMR (150.9 MHz,  $\text{CDCl}_3$ , 20 °C, 11:1 mixture of atropisomers, \*denotes minor atropisomer):

$\delta$  172.1 (C1''), 150.7 (C7a), 150.6 (C7a\*), 142.8 (C7a'),  
137.0 (C4), 132.6 (C4a'), 132.4 (C4a), 129.0 (C6), 127.6  
(C6'), 127.4 (C6'\*), 123.6 (C4'\*), 123.4 (C4'), 121.0  
(C5'\*), 120.7 (C5'), 117.3 (C7'\*), 117.1 (C7'), 114.0  
(C5\*), 113.4 (C5), 102.0 (C7), 101.6 (C7\*), 83.0 (C8a\*),  
82.6 (C8a), 79.8 (C8a'), 77.9 (C8a'\*), 65.5 (C9), 64.2  
(C10), 59.9 (C11), 52.1 (C3a'), 51.6 (C3a), 46.1 (C2'\*),  
44.2 (C2'), 38.2 (C3), 36.5 (C2), 32.7 (C3'\*), 31.0 (C3'),  
29.9 (N8CH<sub>3</sub>\*), 29.8 (N8CH<sub>3</sub>), 24.9 (C12), 24.8 (C12\*),  
23.2 (C2''\*), 22.8 (C2''), 20.6 (C13), 20.5 (C13\*).

FTIR (thin film)  $\text{cm}^{-1}$ :

3320 (br-w), 3052 (w), 2961 (m), 2926 (m), 2880 (m),  
1638 (s), 1605 (s), 1595 (s), 1493 (s), 1402 (s), 1347 (m),  
1254 (m), 1083 (m), 1007 (m), 738 (s).

HRMS (ESI) ( $m/z$ ):

calc'd for  $\text{C}_{28}\text{H}_{33}\text{N}_4\text{O}_2$   $[\text{M}+\text{H}]^+$ : 457.2598,  
found: 457.2590.

$[\alpha]_{\text{D}}^{24}$ :

-165 ( $c = 0.39$ ,  $\text{CHCl}_3$ ).<sup>33</sup>

TLC (40% acetone in hexanes),  $R_f$ :

0.19 (UV, CAM)

---

33. (a) Literature value:  $[\alpha]_{\text{D}}^{22} = -58$  ( $c = 0.14$ ,  $\text{CHCl}_3$ ), see Numata, A.; Takahashi, C.; Ito, Y.; Takada, T.; Kawai, K.; Usami, Y.; Matsumura, E.; Imachi, M.; Ito, T.; Hasegawa, T. *Tetrahedron Lett.* **1993**, *34*, 2355. (b) Literature value:  $[\alpha]_{\text{D}}^{20} = -174$  ( $c = 1.34$ ,  $\text{CHCl}_3$ ), see Hayashi, H.; Matsumoto, H.; Akiyama, K. *Biosci. Biotechnol. Biochem.* **2004**, *68*, 753. (c) Literature value:  $[\alpha]_{\text{D}}^{30} = -163.5$  ( $c = 0.14$ ,  $\text{CHCl}_3$ ), see Zuo, Z.; Ma, D. *Angew. Chem. Int. Ed.* **2011**, *50*, 12008.

**Table S1. Comparison of our <sup>1</sup>H NMR data for (–)-communesin A (2) with literature data (CDCl<sub>3</sub>, major atropisomer):**

| Assignment        | Numata's Isolation Report <sup>34,35</sup><br>(–)-Communesin A (2)<br><sup>1</sup> H NMR, 300 MHz, CDCl <sub>3</sub> | Hayashi's Isolation Report <sup>36,37</sup><br>(–)-Communesin A (2)<br><sup>1</sup> H NMR, CDCl <sub>3</sub> | Ma's Report <sup>38</sup><br>(–)-Communesin A (2)<br><sup>1</sup> H NMR, 400 MHz, CDCl <sub>3</sub> | This Work<br>(–)-Communesin A (2)<br><sup>1</sup> H NMR, 600 MHz, CDCl <sub>3</sub>      |
|-------------------|----------------------------------------------------------------------------------------------------------------------|--------------------------------------------------------------------------------------------------------------|-----------------------------------------------------------------------------------------------------|------------------------------------------------------------------------------------------|
| C2                | 3.47 (dd, <i>J</i> = 16.0, 9.0 Hz, 1H)<br>3.35 (dt, <i>J</i> = 16.0, 9.2 Hz, 1H)                                     | 3.32 (dd, <i>J</i> = 15.5, 9.5 Hz, 1H)<br>3.18 (dt, <i>J</i> = 16.0, 9.2 Hz, 1H)                             | 3.47 (dd, <i>J</i> = 16.0, 9.2 Hz, 1H)<br>3.36 (dt, <i>J</i> = 16.0, 9.2 Hz, 1H)                    | 3.47 (app-dd, <i>J</i> = 15.7, 9.6 Hz, 1H)<br>3.36 (app-dt, <i>J</i> = 16.3, 8.8 Hz, 1H) |
| C3                | 2.35 (m, 1H)<br>2.26 (dd, <i>J</i> = 12.4, 9.2 Hz, 1H)                                                               | 2.27 (dd, <i>J</i> = 12.5, 9.5 Hz, 1H)<br>2.12 (ddd, <i>J</i> = 12.5, 9.5, 8.5 Hz, 1H)                       | 2.39–2.25 (m, 2H)                                                                                   | 2.37 (app-dd, <i>J</i> = 12.5, 7.7 Hz, 1H)<br>2.28 (app-dt, <i>J</i> = 13.0, 9.3 Hz, 1H) |
| C3a               | –                                                                                                                    | –                                                                                                            | –                                                                                                   | –                                                                                        |
| C4a               | –                                                                                                                    | –                                                                                                            | –                                                                                                   | –                                                                                        |
| C4                | –                                                                                                                    | –                                                                                                            | –                                                                                                   | –                                                                                        |
| C5                | 6.07 (d, <i>J</i> = 7.8 Hz, 1H)                                                                                      | 6.03 (d, <i>J</i> = 7.5 Hz, 1H)                                                                              | 6.06 (d, <i>J</i> = 7.6 Hz, 1H)                                                                     | 6.06 (d, <i>J</i> = 7.7 Hz, 1H)                                                          |
| C6                | 6.89 (t, <i>J</i> = 7.8 Hz, 1H)                                                                                      | 6.79 (t, <i>J</i> = 7.5 Hz, 1H)                                                                              | 6.88 (t, <i>J</i> = 7.6 Hz, 1H)                                                                     | 6.88 (t, <i>J</i> = 7.7 Hz, 1H)                                                          |
| C7                | 5.95 (d, <i>J</i> = 7.8 Hz, 1H)                                                                                      | 5.93 (d, <i>J</i> = 7.5 Hz, 1H)                                                                              | 5.95 (d, <i>J</i> = 7.6 Hz, 1H)                                                                     | 5.95 (d, <i>J</i> = 7.7 Hz, 1H)                                                          |
| C7a               | –                                                                                                                    | –                                                                                                            | –                                                                                                   | –                                                                                        |
| N8CH <sub>3</sub> | 2.85 (s, 3H)                                                                                                         | 2.79 (s, 3H)                                                                                                 | 2.84 (s, 3H)                                                                                        | 2.84 (s, 3H)                                                                             |
| C8a               | 4.70 (s, 1H)                                                                                                         | 4.63 (d, <i>J</i> = 1.0 Hz, 1H)                                                                              | 4.69 (s, 1H)                                                                                        | 4.69 (s, 1H)                                                                             |
| C9                | 4.08 (d, <i>J</i> = 9.0 Hz, 1H)                                                                                      | 4.13 (d, <i>J</i> = 9.0 Hz, 1H)                                                                              | 4.08 (d, <i>J</i> = 9.2 Hz, 1H)                                                                     | 4.08 (d, <i>J</i> = 9.1 Hz, 1H)                                                          |
| C10               | 2.87 (d, <i>J</i> = 9.0 Hz, 1H)                                                                                      | 2.89 (d, <i>J</i> = 9.0 Hz, 1H)                                                                              | 2.86 (d, <i>J</i> = 9.6 Hz, 1H)                                                                     | 2.87 (d, <i>J</i> = 8.9 Hz, 1H)                                                          |
| C11               | –                                                                                                                    | –                                                                                                            | –                                                                                                   | –                                                                                        |
| C12               | 1.39 (s, 3H)                                                                                                         | 1.31 (s, 3H)                                                                                                 | 1.38 (s, 3H)                                                                                        | 1.38 (s, 3H)                                                                             |
| C13               | 1.54 (s, 3H)                                                                                                         | 1.48 (s, 3H)                                                                                                 | 1.53 (s, 3H)                                                                                        | 1.53 (s, 3H)                                                                             |
| C2'               | 3.89 (dd, <i>J</i> = 12.0, 8.8 Hz, 1H)<br>3.01 (td, <i>J</i> = 12.0, 7.2 Hz, 1H)                                     | 3.67 (dt, <i>J</i> = 15.0, 7.0 Hz, 1H)<br>2.70 (m, 1H)                                                       | 3.89 (dd, <i>J</i> = 12.0, 8.8 Hz, 1H)<br>3.01 (td, <i>J</i> = 11.6, 8.0 Hz, 1H)                    | 3.89 (app-dd, <i>J</i> = 11.8, 8.4 Hz, 1H)<br>3.01 (app-td, <i>J</i> = 11.6, 7.2 Hz, 1H) |
| C3'               | 2.74 (td, <i>J</i> = 12.0, 8.8 Hz, 1H)<br>1.98 (td, <i>J</i> = 12.0, 7.2 Hz, 1H)                                     | 2.67 (m, 1H)<br>1.72 (dt, <i>J</i> = 12.5, 6.0 Hz, 1H)                                                       | 2.78–2.70 (m, 1H)<br>1.97 (dd, <i>J</i> = 12.8, 7.2 Hz, 1H)                                         | 2.78–2.70 (m, 1H)<br>1.97 (app-dd, <i>J</i> = 13.3, 7.1 Hz, 1H)                          |

34. Numata, A.; Takahashi, C.; Ito, Y.; Takada, T.; Kawai, K.; Usami, Y.; Matsumura, E.; Imachi, M.; Ito, T.; Hasegawa, T. *Tetrahedron Lett.* **1993**, *34*, 2355.

35. The reference points for the residual protium and carbon resonances of the NMR solvent were not listed.

36. Hayashi, H.; Matsumoto, H.; Akiyama, K. *Biosci. Biotechnol. Biochem.* **2004**, *68*, 753.

37. Resonance frequencies and reference points for the residual protium and carbon resonances of the NMR solvent were not listed.

38. Zuo, Z.; Ma, D. *Angew. Chem. Int. Ed.* **2011**, *50*, 12008.

|      |                                  |                                  |                                  |                                      |
|------|----------------------------------|----------------------------------|----------------------------------|--------------------------------------|
| C3a' | –                                | –                                | –                                | –                                    |
| C4a' | –                                | –                                | –                                | –                                    |
| C4'  | 6.70 (d, $J = 2.8$ Hz, 1H)       | 6.73 (dd, $J = 7.5, 1.5$ Hz, 1H) | 6.73–6.67 (m, 3H)                | 6.74–6.66 (m, 3H)                    |
| C5'  | 6.71 (d, $J = 7.5$ Hz, 1H)       | 6.61 (td, $J = 7.5, 1.5$ Hz, 1H) | 6.73–6.67 (m, 3H)                | 6.74–6.66 (m, 3H)                    |
| C6'  | 7.01 (td, $J = 7.5, 2.8$ Hz, 1H) | 6.94 (td, $J = 7.5, 1.5$ Hz, 1H) | 7.01 (td, $J = 7.6, 1.6$ Hz, 1H) | 7.01 (app-td, $J = 7.4, 1.9$ Hz, 1H) |
| C7'  | 6.69 (d, $J = 7.5$ Hz, 1H)       | 6.80 (dd, $J = 7.5, 1.5$ Hz, 1H) | 6.73–6.67 (m, 3H)                | 6.74–6.66 (m, 3H)                    |
| C7a' | –                                | –                                | –                                | –                                    |
| C8a' | 5.03 (s, 1H)                     | 5.11 (s, 1H)                     | 5.02 (s, 1H)                     | 5.02 (d, $J = 1.5$ Hz, 1H)           |
| C1'' | –                                | –                                | –                                | –                                    |
| C2'' | 2.34 (s, 3H)                     | 2.23 (s, 3H)                     | 2.33 (s, 3H)                     | 2.33 (s, 3H)                         |
| N8'H | 4.62 (br-s, 1H)                  | 6.51 (d, 1.0 Hz)                 | –                                | 4.59 (br-s, 1H)                      |

**Table S2. Comparison of our <sup>13</sup>C NMR data for (–)-communesin A (2) with literature data (CDCl<sub>3</sub>, major atropisomer):**

| Assignment        | Numata's Isolation Report <sup>34,35</sup><br>(–)-Communesin A (2)<br><sup>13</sup> C NMR, 75.4 MHz, CDCl <sub>3</sub> | Hayashi's Isolation Report <sup>36,37</sup><br>(–)-Communesin A (2)<br><sup>13</sup> C NMR, CDCl <sub>3</sub> | Ma's Report <sup>38</sup><br>(–)-Communesin A (2)<br><sup>13</sup> C NMR, 100 MHz, CDCl <sub>3</sub> | This Work<br>(–)-Communesin A (2)<br><sup>13</sup> C NMR, 150.9 MHz, CDCl <sub>3</sub> | Chemical Shift Difference<br>$\Delta\delta = \delta$ (this work) –<br>$\delta$ (Numata's report) |
|-------------------|------------------------------------------------------------------------------------------------------------------------|---------------------------------------------------------------------------------------------------------------|------------------------------------------------------------------------------------------------------|----------------------------------------------------------------------------------------|--------------------------------------------------------------------------------------------------|
| C2                | 36.03                                                                                                                  | 35.7                                                                                                          | 36.3                                                                                                 | 36.45                                                                                  | 0.42 <sup>39</sup>                                                                               |
| C3                | 38.03                                                                                                                  | 37.8                                                                                                          | 38.0                                                                                                 | 38.19                                                                                  | 0.16                                                                                             |
| C3a               | 51.42                                                                                                                  | 50.7                                                                                                          | 51.4                                                                                                 | 51.59                                                                                  | 0.17                                                                                             |
| C4a               | 132.23                                                                                                                 | 132.5                                                                                                         | 132.3                                                                                                | 132.40                                                                                 | 0.17                                                                                             |
| C4                | 136.78                                                                                                                 | 137.0                                                                                                         | 136.8                                                                                                | 136.96                                                                                 | 0.18                                                                                             |
| C5                | 113.19                                                                                                                 | 112.7                                                                                                         | 113.2                                                                                                | 113.36                                                                                 | 0.17                                                                                             |
| C6                | 128.89                                                                                                                 | 128.2                                                                                                         | 128.9                                                                                                | 129.04                                                                                 | 0.15                                                                                             |
| C7                | 101.81                                                                                                                 | 101.3                                                                                                         | 101.8                                                                                                | 101.97                                                                                 | 0.16                                                                                             |
| C7a               | 150.55                                                                                                                 | 150.6                                                                                                         | 150.6                                                                                                | 150.71                                                                                 | 0.16                                                                                             |
| N8CH <sub>3</sub> | 29.63                                                                                                                  | 29.6                                                                                                          | 29.6                                                                                                 | 29.78                                                                                  | 0.15                                                                                             |
| C8a               | 82.44                                                                                                                  | 81.4                                                                                                          | 82.5                                                                                                 | 82.62                                                                                  | 0.18                                                                                             |
| C9                | 65.38                                                                                                                  | 64.5                                                                                                          | 65.4                                                                                                 | 65.54                                                                                  | 0.16                                                                                             |
| C10               | 64.01                                                                                                                  | 63.1                                                                                                          | 64.0                                                                                                 | 64.16                                                                                  | 0.15                                                                                             |
| C11               | 59.79                                                                                                                  | 59.2                                                                                                          | 59.8                                                                                                 | 59.90                                                                                  | 0.11                                                                                             |
| C12               | 24.80                                                                                                                  | 24.5                                                                                                          | 24.8                                                                                                 | 24.94                                                                                  | 0.14                                                                                             |
| C13               | 20.50                                                                                                                  | 20.1                                                                                                          | 20.5                                                                                                 | 20.64                                                                                  | 0.14                                                                                             |
| C2'               | 44.08                                                                                                                  | 43.5                                                                                                          | 44.1                                                                                                 | 44.21                                                                                  | 0.13                                                                                             |
| C3'               | 30.81                                                                                                                  | 30.4                                                                                                          | 30.8                                                                                                 | 30.97                                                                                  | 0.16                                                                                             |
| C3a'              | 51.92                                                                                                                  | 51.4                                                                                                          | 52.0                                                                                                 | 52.10                                                                                  | 0.18                                                                                             |
| C4a'              | 132.38                                                                                                                 | 132.1                                                                                                         | 132.4                                                                                                | 132.56                                                                                 | 0.18                                                                                             |
| C4'               | 123.21                                                                                                                 | 123.3                                                                                                         | 123.2                                                                                                | 123.38                                                                                 | 0.17                                                                                             |
| C5'               | 120.54                                                                                                                 | 118.7                                                                                                         | 120.6                                                                                                | 120.71                                                                                 | 0.17                                                                                             |
| C6'               | 127.43                                                                                                                 | 126.9                                                                                                         | 127.4                                                                                                | 127.56                                                                                 | 0.13                                                                                             |
| C7'               | 116.97                                                                                                                 | 116.5                                                                                                         | 117.0                                                                                                | 117.10                                                                                 | 0.13                                                                                             |
| C7a'              | 142.69                                                                                                                 | 144.1                                                                                                         | 142.7                                                                                                | 142.80                                                                                 | 0.11                                                                                             |
| C8a'              | 79.65                                                                                                                  | 78.4                                                                                                          | 79.7                                                                                                 | 79.79                                                                                  | 0.14                                                                                             |
| C1''              | 170.02                                                                                                                 | 170.9                                                                                                         | 172.1                                                                                                | 172.12                                                                                 | 2.10 <sup>39</sup>                                                                               |
| C2''              | 22.65                                                                                                                  | 22.2                                                                                                          | 22.6                                                                                                 | 22.80                                                                                  | 0.15                                                                                             |

39. Similar chemical shift discrepancies for the C2 and C1'' resonances were noted by Ma and Zuo in their total synthesis report (ref. 38).

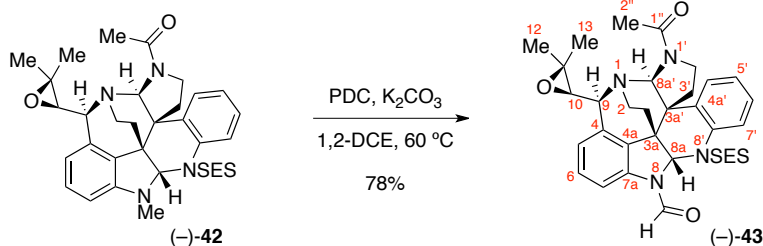

### Heptacyclic formamide (–)-43:

Samples of crushed potassium carbonate (123 mg, 891  $\mu\text{mol}$ , 40.0 equiv) and pyridinium dichromate (PDC, 83.8 mg, 223  $\mu\text{mol}$ , 10.0 equiv) were added sequentially to a solution of (–)-N8'-(trimethylsilyl)ethanesulfonyl communesin A (**42**, 13.8 mg, 22.3  $\mu\text{mol}$ , 1 equiv) in 1,2-dichloroethane (1.50 mL) at 23 °C. The flask was sealed with a Teflon-lined glass stopper under an argon atmosphere and was immersed in a preheated oil bath at 60 °C. After stirring for 8 h, the brown suspension was cooled to 23 °C, was diluted with dichloromethane (5 mL), and was filtered through a pad of silica gel covered with a pad of Celite. The filter cake was washed with acetone–dichloromethane (1:1, 70 mL) and the filtrate was concentrated under reduced pressure. The resulting residue was purified by flash column chromatography on silica gel (eluent: 20% isopropanol in hexanes) to afford heptacyclic formamide (–)-43 (11.0 mg, 77.6%) as a white solid.

$^1\text{H}$  NMR (600 MHz,  $\text{CDCl}_3$ , 20 °C, 23:9.6\*:2.0:1.0 mixture of atropisomers, \*denotes minor atropisomer):

$\delta$  8.83 (s, 1H), 8.81\* (s, 1H), 7.25–7.15 (m, 2H), 7.12–7.00 (m, 2H), 6.81 (dd,  $J = 11.3, 7.4$  Hz, 1H), 6.75 (app-t,  $J = 7.3$  Hz, 1H), 6.64\* (d,  $J = 8.1$  Hz, 1H), 6.62 (d,  $J = 7.7$  Hz, 1H), 6.43 (s, 1H), 6.38\* (s, 1H), 5.41\* (s, 1H), 5.01 (s, 1H), 4.59\* (d,  $J = 8.1$  Hz, 1H), 4.18 (d,  $J = 8.9$  Hz, 1H), 4.11 (td,  $J = 13.8, 3.9$  Hz, 1H), 3.95 (dd,  $J = 12.3, 8.7$  Hz, 1H), 3.77\* (app-t,  $J = 9.4$  Hz, 1H), 3.59–3.45 (m, 2H), 3.44–3.35 (m, 1H), 3.30–3.21\* (m, 1H), 3.10 (app-td,  $J = 11.4, 7.4$  Hz, 1H), 3.06–2.97\* (m, 1H), 2.88–2.81 (m, 1H), 2.79 (d,  $J = 8.9$  Hz, 1H), 2.71\* (d,  $J = 8.5$  Hz, 1H), 2.67 (dd,  $J = 14.1, 8.2$  Hz, 1H), 2.44\* (dd,  $J = 14.1, 7.3$  Hz, 1H), 2.32 (s, 3H), 2.37–2.25 (m, 2H), 2.10\* (s, 3H), 1.57\* (s, 3H), 1.54 (s, 3H), 1.37 (s, 3H), 1.35\* (s, 3H), 1.31–1.15 (m, 2H), 0.16 (s, 9H).

$^{13}\text{C}$  NMR (150.9 MHz,  $\text{CDCl}_3$ , 20 °C, mixture of atropisomers):<sup>40</sup>  $\delta$  171.5, 170.7, 159.3, 141.2, 140.2, 139.9, 139.6, 139.2, 138.8, 135.6 (2C), 134.4, 134.2, 129.5, 129.3, 128.1, 127.9, 127.3, 127.2, 127.1, 126.6, 124.2, 123.8, 122.6, 122.1, 107.1, 106.7, 79.9, 78.5, 78.1, 76.9, 76.6, 65.2, 65.0, 63.8, 59.9, 59.8, 54.8, 54.6, 52.8, 52.7, 52.3, 50.0, 46.0, 44.3, 37.8, 37.1, 36.8, 36.4, 32.5, 30.9, 24.8 (2C), 23.1, 22.9, 20.6, 20.4, 10.9, 10.8, –1.5, –1.7, –1.8, (2C).

40. More than the expected 33  $^{13}\text{C}$  resonances were observed due to the presence of multiple atropisomers. All observed resonances are listed.

|                                           |                                                                                                                                          |
|-------------------------------------------|------------------------------------------------------------------------------------------------------------------------------------------|
| FTIR (thin film) $\text{cm}^{-1}$ :       | 2954 (w), 2895 (w), 1682 (s), 1651 (s), 1592 (m), 1486 (m), 1468 (m), 1400 (m), 1342 (s), 1250 (m), 1072 (m), 893 (m), 842 (m), 701 (m). |
| HRMS (ESI) ( $m/z$ ):                     | calc'd for $\text{C}_{33}\text{H}_{43}\text{N}_4\text{O}_5\text{SSi} [\text{M}+\text{H}]^+$ : 635.2718,<br>found: 635.2715.              |
| $[\alpha]_{\text{D}}^{23}$ :              | -56 ( $c = 0.49$ , $\text{CH}_2\text{Cl}_2$ ).                                                                                           |
| TLC (20% isopropanol in hexanes), $R_f$ : | 0.21 (UV, CAM).                                                                                                                          |

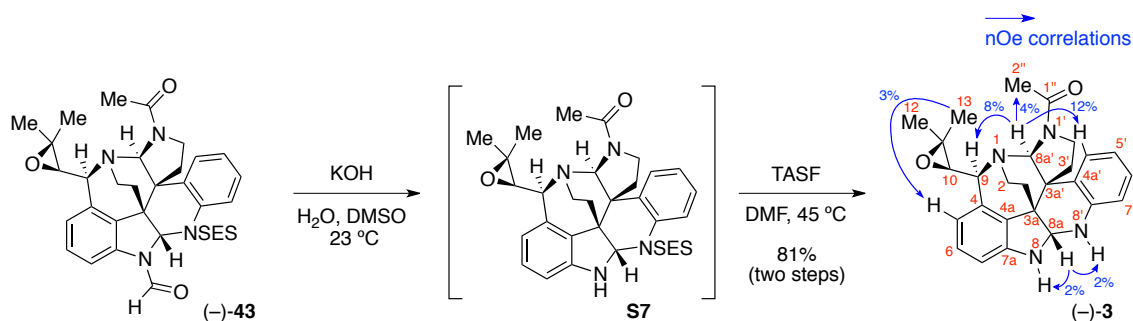

### **(-)-Communesin E (3):**

An aqueous potassium hydroxide solution (0.5 M, 172  $\mu$ L, 86.0  $\mu$ mol, 5.00 equiv) was added rapidly to a solution of heptacyclic formamide (-)-**43** (10.9 mg, 17.2  $\mu$ mol, 1 equiv) in dimethyl sulfoxide (1.72 mL) and deionized water (172  $\mu$ L) at 23  $^{\circ}$ C. After 25 min, the light-yellow homogeneous solution was diluted with a saturated aqueous sodium chloride solution (20 mL) and the mixture was extracted with ethyl acetate (3  $\times$  10 mL). The combined organic extracts were washed with a saturated aqueous sodium chloride solution (2  $\times$  20 mL), were dried over anhydrous sodium sulfate, were filtered, and were concentrated under reduced pressure. The resulting residue was purified by flash column chromatography on silica gel (eluent: 40% acetone in hexanes) to afford sulfonamide **S7** as a colorless film, contaminated with a trace amount of (-)-**3**. This mixture was used directly in the next step without further purification.

A degassed solution of tris(dimethylamino)sulfonium difluorotrimethylsilicate (TASF, 19.0 mg, 68.8  $\mu$ mol, 4.00 equiv) in *N,N*-dimethylformamide (175  $\mu$ L) was added to a degassed solution of sulfonamide **S7** (1 equiv) in *N,N*-dimethylformamide (400  $\mu$ L) at 23  $^{\circ}$ C. The flask was then immersed in a preheated oil bath at 45  $^{\circ}$ C. After 2 h, the solution was cooled to 23  $^{\circ}$ C and a saturated aqueous sodium chloride solution (10 mL) and deionized water (5 mL) were added and the mixture was extracted with ethyl acetate (3  $\times$  10 mL). The combined organic extracts were washed with a saturated aqueous sodium chloride solution (2  $\times$  15 mL), were dried over anhydrous sodium sulfate, were filtered, and were concentrated under reduced pressure. The resulting residue was purified by flash column chromatography on silica gel (eluent: 50 $\rightarrow$ 60% ethyl acetate in dichloromethane) to afford (-)-communesin E (**3**, 6.14 mg, 80.9% over two steps) as an off-white film. Structural assignments were made using additional information from gCOSY, gHSQC, gHMBC, and 1D selective NOESY experiments.

$^1$ H NMR (500 MHz, CDCl<sub>3</sub>, 21  $^{\circ}$ C, 11:1 mixture of atropisomers, \*denotes minor atropisomer):

$\delta$  7.02 (ddd,  $J$  = 7.6, 6.4, 2.7 Hz, 2H, C6'H, C6'H\*), 6.85 (app-t,  $J$  = 7.6 Hz, 1H, C6'H), 6.84 (app-t,  $J$  = 7.6 Hz, 1H, C6'H\*), 6.75–6.66 (m, 5H, C4'H, C5'H, C5'H\*, C7'H, C7'H\*), 6.64 (d,  $J$  = 7.5 Hz, 1H, C4'H\*), 6.22 (d,  $J$  = 7.6 Hz, 1H, C7'H), 6.21 (d,  $J$  = 7.9 Hz, 1H, C5'H\*), 6.19 (d,  $J$  = 7.1 Hz, 1H, C7'H\*), 6.17 (d,  $J$  = 7.6 Hz, 1H, C5'H), 5.41 (s, 1H, C8a'H\*), 5.03 (d,  $J$  = 1.8 Hz, 1H, C8a'H), 5.01 (s, 1H, C8a'H), 4.52 (d,  $J$  = 8.5 Hz, 1H, C9'H\*), 4.28 (br-s, 1H, N8'H/N8'H), 4.20 (br-s, 1H, N8'H/N8'H), 4.09 (d,  $J$  = 9.2 Hz, 1H, C9'H), 3.89 (app-dd,  $J$  = 11.9, 8.2 Hz, 1H, C2'H<sub>a</sub>), 3.76–3.67 (m, 1H, C2'H<sub>a</sub>\*), 3.60–3.50 (m, 1H, C2'H<sub>a</sub>\*), 3.50–3.42 (m, 1H, C2'H<sub>a</sub>), 3.36 (app-dt,  $J$  = 15.9, 8.9 Hz, 2H, C2'H<sub>b</sub>, C2'H<sub>b</sub>\*), 3.19–3.08 (m, 1H, C2'H<sub>b</sub>\*), 3.03 (app-td,  $J$  = 11.6, 7.3 Hz, 1H, C2'H<sub>b</sub>), 2.98–2.89 (m, 1H, C3'H<sub>a</sub>\*), 2.86 (d,  $J$  = 9.2 Hz, 1H, C10'H), 2.80 (d,  $J$  = 8.9 Hz, 1H, C10'H\*), 2.74 (ddd,  $J$  = 13.4, 11.6, 8.9 Hz, 1H, C3'H<sub>a</sub>), 2.42–2.34 (m, 1H,

$^1\text{H}$  NMR (400 MHz,  $\text{CDCl}_3$ ): 2.34 (s, 3H,  $\text{C}2''\text{H}_3$ ), 2.33–2.25 (m, 1H,  $\text{C}3\text{H}_b$ ), 2.08 (s, 3H,  $\text{C}2''\text{H}_3^*$ ), 2.02 (app-dd,  $J = 12.8, 7.6$  Hz, 1H,  $\text{C}3'\text{H}_b^*$ ), 1.94 (app-dd,  $J = 13.1, 6.7$  Hz, 1H,  $\text{C}3'\text{H}_b$ ), 1.58 (s, 3H,  $\text{C}13\text{H}_3^*$ ), 1.53 (s, 3H,  $\text{C}13\text{H}_3$ ), 1.39 (s, 3H,  $\text{C}12\text{H}_3$ ), 1.37 (s, 3H,  $\text{C}12\text{H}_3^*$ ).

$^{13}\text{C}$  NMR (150.9 MHz,  $\text{CDCl}_3$ , 20 °C, 11:1 mixture of atropisomers, \*denotes minor atropisomer):

$\delta$  172.2 ( $\text{C}1''$ ), 171.5 ( $\text{C}1''^*$ ), 149.8 ( $\text{C}7a$ ), 142.7 ( $\text{C}7a^*$ ), 142.6 ( $\text{C}7a'$ ), 137.6 ( $\text{C}4$ ), 133.0 ( $\text{C}4a$ ), 131.9 ( $\text{C}4a'$ ), 128.8 ( $\text{C}6$ ), 128.7 ( $\text{C}6^*$ ), 127.5 ( $\text{C}6'$ ), 127.3 ( $\text{C}6'^*$ ), 123.6 ( $\text{C}4'^*$ ), 123.3 ( $\text{C}4'$ ), 120.9 ( $\text{C}5'^*$ ), 120.5 ( $\text{C}5'$ ), 117.3 ( $\text{C}7'^*$ ), 117.0 ( $\text{C}7'$ ), 116.1 ( $\text{C}5^*$ ), 115.5 ( $\text{C}5$ ), 106.3 ( $\text{C}7$ ), 106.0 ( $\text{C}7^*$ ), 80.0 ( $\text{C}8a'$ ), 78.1 ( $\text{C}8a'^*$ ), 77.2 ( $\text{C}8a$ ), 65.6 ( $\text{C}9$ ), 65.2 ( $\text{C}9^*$ ), 64.1 ( $\text{C}10$ ), 59.9 ( $\text{C}11$ ), 52.5 ( $\text{C}3a$ ), 52.0 ( $\text{C}3a'$ ), 46.1 ( $\text{C}2'^*$ ), 44.2 ( $\text{C}2'$ ), 38.3 ( $\text{C}3$ ), 37.9 ( $\text{C}2^*$ ), 36.3 ( $\text{C}2$ ), 32.6 ( $\text{C}3'^*$ ), 30.9 ( $\text{C}3'$ ), 25.0 ( $\text{C}12$ ), 24.9 ( $\text{C}12^*$ ), 23.2 ( $\text{C}2''^*$ ), 22.8 ( $\text{C}2''$ ), 20.6 ( $\text{C}13$ ), 20.5 ( $\text{C}13^*$ ).

FTIR (thin film)  $\text{cm}^{-1}$ :

3341 (br-m), 3051 (w), 3028 (w), 2962 (m), 2926 (m), 2879 (m), 1631 (s), 1605 (s), 1481 (m), 1460 (m), 1403 (s), 1348 (m), 1250 (m), 1166 (m), 1084 (m), 1062 (m), 1015 (m), 747 (m).

HRMS (ESI) ( $m/z$ ):

calc'd for  $\text{C}_{27}\text{H}_{31}\text{N}_4\text{O}_2$   $[\text{M}+\text{H}]^+$ : 443.2442,  
found: 443.2439.

$[\alpha]_D^{23}$ :

-191 ( $c = 0.31$ ,  $\text{CHCl}_3$ ).<sup>41</sup>

TLC (50% ethyl acetate in dichloromethane),  $R_f$ : 0.11 (UV, CAM).

---

41. Literature value:  $[\alpha]_D^{20} = -156$  ( $c = 0.11$ ,  $\text{CHCl}_3$ ), see Hayashi, H.; Matsumoto, H.; Akiyama, K. *Biosci. Biotechnol. Biochem.* **2004**, *68*, 753.



**Table S3. Comparison of our <sup>1</sup>H NMR data for (–)-communesin E (3) with literature data (CDCl<sub>3</sub>, major atropisomer):**

| Assignment | Hayashi's Isolation Report <sup>36,37</sup><br>(–)-Communesin E (3)<br><sup>1</sup> H NMR, CDCl <sub>3</sub> | This Work<br>(–)-Communesin E (3)<br><sup>1</sup> H NMR, 500 MHz, CDCl <sub>3</sub>         |
|------------|--------------------------------------------------------------------------------------------------------------|---------------------------------------------------------------------------------------------|
| C2         | 3.46 (ddd, <i>J</i> = 15.9, 8.9, 1.8 Hz, 1H)<br>3.36 (dt, <i>J</i> = 15.9, 9.2 Hz, 1H)                       | 3.50–3.42 (m, 1H)<br>3.36 (app-dt, <i>J</i> = 15.9, 8.9 Hz, 1H)                             |
| C3         | 2.37 (ddd, <i>J</i> = 12.8, 9.2, 1.8 Hz, 1H)<br>2.30 (ddd, <i>J</i> = 12.8, 9.2, 8.9 Hz, 1H)                 | 2.42–2.34 (m, 1H)<br>2.33–2.25 (m, 1H)                                                      |
| C3a        | –                                                                                                            | –                                                                                           |
| C4a        | –                                                                                                            | –                                                                                           |
| C4         | –                                                                                                            | –                                                                                           |
| C5         | 6.17 (d, <i>J</i> = 7.6 Hz, 1H)                                                                              | 6.17 (d, <i>J</i> = 7.6 Hz, 1H)                                                             |
| C6         | 6.85 (d, <i>J</i> = 7.6 Hz, 1H)                                                                              | 6.85 (d, <i>J</i> = 7.6 Hz, 1H)                                                             |
| C7         | 6.22 (d, <i>J</i> = 7.6 Hz, 1H)                                                                              | 6.22 (d, <i>J</i> = 7.6 Hz, 1H)                                                             |
| C7a        | –                                                                                                            | –                                                                                           |
| C8a        | 5.02 (s, 1H)                                                                                                 | 5.01 (s, 1H)                                                                                |
| C9         | 4.10 (d, <i>J</i> = 9.1 Hz, 1H)                                                                              | 4.09 (d, <i>J</i> = 9.2 Hz, 1H)                                                             |
| C10        | 2.87 (d, <i>J</i> = 9.1 Hz, 1H)                                                                              | 2.86 (d, <i>J</i> = 9.2 Hz, 1H)                                                             |
| C11        | –                                                                                                            | –                                                                                           |
| C12        | 1.39 (s, 3H)                                                                                                 | 1.39 (s, 3H)                                                                                |
| C13        | 1.54 (s, 3H)                                                                                                 | 1.53 (s, 3H)                                                                                |
| C2'        | 3.90 (dd, <i>J</i> = 11.6, 8.6 Hz, 1H)<br>3.03 (td, <i>J</i> = 11.6, 7.3 Hz, 1H)                             | 3.89 (app-dd, <i>J</i> = 11.9, 8.2 Hz, 1H)<br>3.03 (app-td, <i>J</i> = 11.6, 7.3 Hz, 1H)    |
| C3'        | 2.74 (ddd, <i>J</i> = 13.4, 11.6, 8.6 Hz, 1H)<br>1.95 (dd, <i>J</i> = 13.4, 7.3 Hz, 1H)                      | 2.74 (ddd, <i>J</i> = 13.4, 11.6, 8.9 Hz, 1H)<br>1.94 (app-dd, <i>J</i> = 13.1, 6.7 Hz, 1H) |
| C3a'       | –                                                                                                            | –                                                                                           |
| C4a'       | –                                                                                                            | –                                                                                           |
| C4'        | 6.71 (m, 3H)                                                                                                 | 6.75–6.66 (m, 3H)                                                                           |
| C5'        | 6.71 (m, 3H)                                                                                                 | 6.75–6.66 (m, 3H)                                                                           |
| C6'        | 7.02 (ddd, <i>J</i> = 7.9, 6.7, 2.1 Hz, 1H)                                                                  | 7.02 (ddd, <i>J</i> = 7.6, 6.4, 2.7 Hz, 1H)                                                 |
| C7'        | 6.71 (m, 3H)                                                                                                 | 6.75–6.66 (m, 3H)                                                                           |
| C7a'       | –                                                                                                            | –                                                                                           |
| C8a'       | 5.04 (s, 1H)                                                                                                 | 5.03 (d, <i>J</i> = 1.8 Hz, 1H)                                                             |
| C1''       | –                                                                                                            | –                                                                                           |
| C2''       | 2.35 (s, 3H)                                                                                                 | 2.34 (s, 3H)                                                                                |
| N8H / N8'H | –                                                                                                            | 4.28 (br-s, 1H)                                                                             |
| N8H / N8'H | –                                                                                                            | 4.20 (br-s, 1H)                                                                             |

**Table S4. Comparison of our  $^{13}\text{C}$  NMR data for (–)-communesin E (3) with literature data ( $\text{CDCl}_3$ , major atropisomer):**

| Assignment | Hayashi's Isolation Report <sup>36,37</sup><br>(–)-Communesin E (3)<br>$^{13}\text{C}$ NMR, $\text{CDCl}_3$ | This Work<br>(–)-Communesin E (3)<br>$^{13}\text{C}$ NMR, 150.9 MHz, $\text{CDCl}_3$ | Chemical Shift Difference<br>$\Delta\delta = \delta$ (this work) –<br>$\delta$ (Hayashi report) |
|------------|-------------------------------------------------------------------------------------------------------------|--------------------------------------------------------------------------------------|-------------------------------------------------------------------------------------------------|
| C2         | 36.2                                                                                                        | 36.3                                                                                 | 0.1                                                                                             |
| C3         | 38.1                                                                                                        | 38.3                                                                                 | 0.2                                                                                             |
| C3a        | 51.8                                                                                                        | <b>52.5</b>                                                                          | <b>0.7<sup>42</sup></b>                                                                         |
| C4a        | 132.8                                                                                                       | 133.0                                                                                | 0.2                                                                                             |
| C4         | 137.4                                                                                                       | 137.6                                                                                | 0.2                                                                                             |
| C5         | 115.2                                                                                                       | 115.4                                                                                | 0.2                                                                                             |
| C6         | 128.7                                                                                                       | 128.8                                                                                | 0.1                                                                                             |
| C7         | 106.1                                                                                                       | 106.3                                                                                | 0.2                                                                                             |
| C7a        | 149.6                                                                                                       | 149.8                                                                                | 0.2                                                                                             |
| C8a        | 77.0                                                                                                        | 77.2                                                                                 | 0.2                                                                                             |
| C9         | 65.4                                                                                                        | 65.6                                                                                 | 0.2                                                                                             |
| C10        | 64.0                                                                                                        | 64.1                                                                                 | 0.1                                                                                             |
| C11        | 59.8                                                                                                        | 59.9                                                                                 | 0.1                                                                                             |
| C12        | 24.8                                                                                                        | 25.0                                                                                 | 0.2                                                                                             |
| C13        | 20.5                                                                                                        | 20.6                                                                                 | 0.1                                                                                             |
| C2'        | 44.1                                                                                                        | 44.2                                                                                 | 0.1                                                                                             |
| C3'        | 30.7                                                                                                        | 30.9                                                                                 | 0.2                                                                                             |
| C3a'       | 52.8                                                                                                        | <b>52.0</b>                                                                          | <b>-0.8<sup>42</sup></b>                                                                        |
| C4a'       | 131.6                                                                                                       | 131.9                                                                                | 0.3                                                                                             |
| C4'        | 123.1                                                                                                       | 123.3                                                                                | 0.2                                                                                             |
| C5'        | 120.3                                                                                                       | 120.5                                                                                | 0.2                                                                                             |
| C6'        | 127.3                                                                                                       | 127.5                                                                                | 0.2                                                                                             |
| C7'        | 116.9                                                                                                       | 117.1                                                                                | 0.2                                                                                             |
| C7a'       | 142.5                                                                                                       | 142.6                                                                                | 0.1                                                                                             |
| C8a'       | 79.8                                                                                                        | 80.0                                                                                 | 0.2                                                                                             |
| C1''       | 172.1                                                                                                       | 172.2                                                                                | 0.1                                                                                             |
| C2''       | 22.7                                                                                                        | 22.8                                                                                 | 0.1                                                                                             |

42. Our revised assignment of C3a and C3a' resonances is supported by key gHMBC correlations ( $^1\text{H}$ ,  $^{13}\text{C}$ ) in ppm: (6.75–6.66, 52.00), (3.89, 52.00), (6.17, 52.54), and (3.46, 52.54).



$^{13}\text{C}$  NMR (150.9 MHz,  $\text{CDCl}_3$ , 20 °C, 48 : 8.9\* : 1 mixture of atropisomers, \* denotes minor atropisomer):  
 $\delta$  171.9 (C1"), 170.9 (C1''\*), 158.2 (2C, N8CHO\*, N8CHO), 141.7 (C7a'\*), 141.5 (C7a'), 140.5 (C7a), 140.3 (C7a\*), 139.4 (C4), 135.2 (C4a), 135.0 (C4a\*), 131.6 (C4a'\*), 131.2 (C4a'), 129.1 (C6), 128.9 (C6\*), 128.0 (C6'), 127.8 (C6'\*), 123.4 (C4'\*), 123.2 (C4'), 122.5 (C5\*), 121.9 (C5), 121.4 (C5'\*), 121.1 (C5'), 117.4 (2C, C7'\*, C7'), 106.5 (C7), 106.1 (C7\*), 79.3 (C8a'), 77.8 (C8a\*), 77.5 (C8a'\*), 77.4 (C8a), 65.3 (C9), 64.9 (C9\*), 63.9 (2C, C10, C10\*), 60.0 (C11), 59.9 (C11\*), 51.9 (C3a'), 50.9 (C3a), 50.8 (C3a\*), 49.6 (C3a'\*), 45.9 (C2'\*), 44.1 (C2'), 38.0 (C3\*), 37.8 (C3), 37.6 (C2\*), 36.3 (C2), 32.5 (C3'\*), 30.8 (C3'), 24.9 (C12), 24.8 (C12\*), 23.1 (C2''\*), 22.8 (C2''), 20.6 (C13), 20.4 (C13\*).

FTIR (thin film)  $\text{cm}^{-1}$ : 3292 (br-w), 3056 (w), 2978 (w), 2959 (w), 2926 (w), 2876 (w), 1662 (s), 1640 (s), 1585 (m), 1495 (m), 1466 (m), 1415 (s), 1346 (m), 1254 (m), 750 (m).

HRMS (ESI) ( $m/z$ ): calc'd for  $\text{C}_{28}\text{H}_{31}\text{N}_4\text{O}_3$   $[\text{M}+\text{H}]^+$ : 471.2391, found: 471.2392.

$[\alpha]_{\text{D}}^{23}$ : +60 ( $c = 0.29$ ,  $\text{CHCl}_3$ ).

TLC (40% acetone in hexanes),  $R_f$ : 0.11 (UV, CAM).

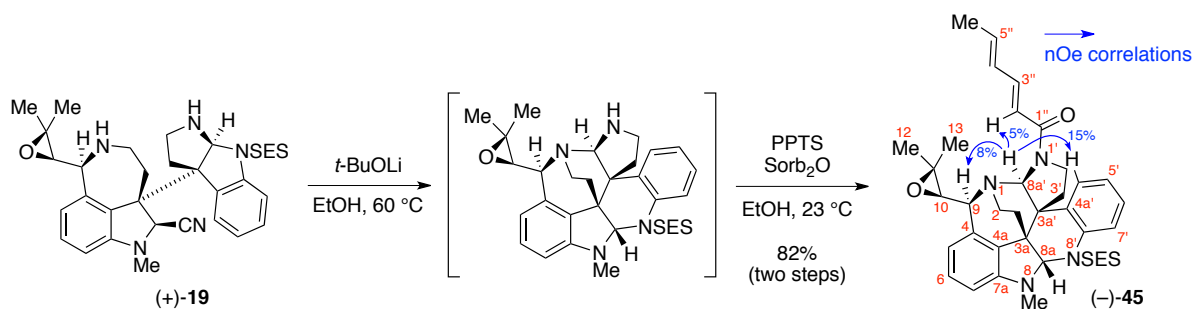

### **(-)-N8'-(Trimethylsilyl)ethanesulfonyl communesin B (45):**

A sample of lithium *tert*-butoxide (21.5 mg, 268  $\mu\text{mol}$ , 10.0 equiv) was added to a solution of heterodimer (+)-**19** (16.3 mg, 26.8  $\mu\text{mol}$ , 1 equiv) in anhydrous ethanol (200 proof, 700  $\mu\text{L}$ ) at 23  $^\circ\text{C}$ . The flask was sealed with a Teflon-lined glass stopper under an argon atmosphere and was immersed in a preheated oil bath at 60  $^\circ\text{C}$ . After 20 h, the reaction mixture was cooled to 23  $^\circ\text{C}$  and samples of pyridinium *p*-toluenesulfonate (PPTS, 54.0 mg, 215  $\mu\text{mol}$ , 8.00 equiv) and sorbic anhydride<sup>43</sup> (22.1 mg, 107  $\mu\text{mol}$ , 4.00 equiv) were added sequentially. After 30 min, a saturated aqueous sodium bicarbonate solution (10 mL) and deionized water (10 mL) were added and the resulting mixture was extracted with ethyl acetate (3  $\times$  10 mL). The combined organic extracts were washed with a saturated aqueous sodium chloride solution (15 mL), were dried over anhydrous sodium sulfate, were filtered, and were concentrated under reduced pressure. The residue was purified by flash column chromatography on silica gel (eluent: 35%  $\rightarrow$  40% ethyl acetate in hexanes) to afford (-)-N8'-(trimethylsilyl)ethanesulfonyl communesin B (**45**, 14.8 mg, 82.1%) as a white solid. Crystals suitable for X-ray diffraction were obtained by slow evaporation a solution of (-)-**45** in ethanol at 0  $^\circ\text{C}$ . The thermal ellipsoid representation of (-)-**45** is depicted later in this document. Structural assignments were made using additional information from gCOSY, gHSQC, gHMBC, and 1D selective NOESY experiments.

<sup>1</sup>H NMR (600 MHz, CDCl<sub>3</sub>, 20  $^\circ\text{C}$ , 6.8:1 mixture of atropisomers, \*denotes minor atropisomer):

$\delta$  7.57 (dd,  $J = 8.0, 1.2$  Hz, 1H, C7'**H**), 7.41 (d,  $J = 8.0$  Hz, 1H, C7'**H**\*), 7.32 (dd,  $J = 15.1, 10.5$  Hz, 2H, C3''**H**, C3''**H**\*), 7.17 (app-td,  $J = 7.7, 1.4$  Hz, 2H, C6'**H**, C6'**H**\*), 7.02 (app-td,  $J = 7.6, 1.3$  Hz, 2H, C5'**H**, C5'**H**\*), 6.91 (t,  $J = 7.7$  Hz, 1H, C6**H**), 6.90 (t,  $J = 7.4$  Hz, 1H, C6**H**\*), 6.80 (dd,  $J = 7.9, 1.4$  Hz, 1H, C4'**H**), 6.77 (app-d,  $J = 7.8$  Hz, 1H, C4'**H**\*), 6.48 (d,  $J = 15.1$  Hz, 1H, C2''**H**), 6.24–6.09 (m, 6H, C4''**H**, C4''**H**\*, C5''**H**, C5''**H**\*, C5**H**, C5**H**\*), 6.08 (d,  $J = 16.2$  Hz, 1H, C2''**H**\*), 5.98 (d,  $J = 7.8$  Hz, 1H, C7**H**), 5.94 (d,  $J = 7.7$  Hz, 1H, C7**H**\*), 5.73 (s, 1H, C8a**H**), 5.65 (s, 1H, C8a**H**\*), 5.54 (app-s, 1H, C8a'**H**\*), 5.13 (app-s, 1H, C8a'**H**), 4.58–4.50 (m, 1H, C9**H**\*), 4.18

43. The reagent was prepared as follows: oxalyl chloride (2.18 mL, 25 mmol, 1 equiv) was added dropwise to a solution of sorbic acid (5.61 g, 50 mmol, 2.00 equiv), triethylamine (6.97 mL, 50 mmol, 2.00 equiv), and *N,N*-dimethylformamide (19.0  $\mu\text{L}$ , 250  $\mu\text{mol}$ , 0.0100 equiv) in dichloromethane (250 mL) at 0  $^\circ\text{C}$ , during which time gentle gas evolution was noted. After 20 min, the ice bath was removed and the solution was allowed to stir at 23  $^\circ\text{C}$ . After 6 h, the mixture was diluted with a saturated aqueous ammonium chloride solution (200 mL) and deionized water (100 mL). The layers were separated and the aqueous layer was extracted with dichloromethane (2  $\times$  100 mL). The combined organic extracts were washed with a saturated aqueous sodium chloride solution (250 mL), were dried over anhydrous sodium sulfate, were filtered, and were concentrated under reduced pressure. The resulting residue was purified by flash column chromatography on silica gel (eluent: 60  $\rightarrow$  80% dichloromethane in pentane) to afford sorbic anhydride (4.41 g, 85.4%) as a pale-yellow oil, which solidified on standing to an off-white waxy solid. <sup>1</sup>H NMR (500 MHz, CDCl<sub>3</sub>): 7.43–7.30 (m, 2H), 6.32–6.17 (m, 4H), 5.81 (d,  $J = 15.2$  Hz, 2H), 1.89 (d,  $J = 5.1$  Hz, 6H). <sup>13</sup>C NMR (125.8 MHz, CDCl<sub>3</sub>): 163.0, 148.9, 142.4, 129.8, 117.8, 19.0. Spectral data were in agreement with those previously reported in the literature: Honda, T.; Namiki, H.; Kudoh, M.; Nagase, H.; Mizutani, H. *Heterocycles* **2003**, *59*, 169.

(d,  $J = 9.0$  Hz, 1H, C9H), 3.92 (app-dd,  $J = 12.2, 8.5$  Hz, 2H, C2'H<sub>a</sub>, C2'H<sub>a</sub>\*), 3.61–3.54 (m, 1H, C2'H<sub>a</sub>\*), 3.50 (app-dd,  $J = 16.0, 9.6$  Hz, 1H, C2'H<sub>a</sub>), 3.41 (app-dt,  $J = 16.2, 8.6$  Hz, 2H, C2'H<sub>b</sub>, C2'H<sub>b</sub>\*), 3.33–3.24 (m, 1H, C2'H<sub>b</sub>\*), 3.23 (app-td,  $J = 13.5, 4.6$  Hz, 2H, N8'SO<sub>2</sub>CH<sub>a</sub>, N8'SO<sub>2</sub>CH<sub>a</sub>\*), 3.19–3.10 (m, 3H, C2'H<sub>b</sub>, N8'SO<sub>2</sub>CH<sub>b</sub>, N8'SO<sub>2</sub>CH<sub>b</sub>\*), 3.08–2.98 (m, 1H, C3'H<sub>a</sub>\*), 2.93 (s, 3H, N8CH<sub>3</sub>), 2.88 (d,  $J = 9.0$  Hz, 1H, C10H), 2.87 (s, 3H, N8CH<sub>3</sub>\*), 2.81 (app-td,  $J = 12.0, 8.6$  Hz, 2H, C10H\*, C3'H<sub>a</sub>), 2.56–2.44 (m, 2H, C3'H<sub>a</sub>, C3'H<sub>a</sub>\*), 2.30 (app-dt,  $J = 13.1, 9.2$  Hz, 2H, C3'H<sub>b</sub>, C3'H<sub>b</sub>\*), 2.12 (app-dd,  $J = 13.3, 7.5$  Hz, 1H, C3'H<sub>b</sub>\*), 1.93 (app-dd,  $J = 13.0, 7.2$  Hz, 1H, C3'H<sub>b</sub>), 1.85 (d,  $J = 6.4$  Hz, 3H, C6''H<sub>3</sub>), 1.83 (d,  $J = 6.8$  Hz, 3H, C6''H<sub>3</sub>\*), 1.64 (s, 3H, C12/13H<sub>3</sub>), 1.60 (s, 3H, C12/13H<sub>3</sub>\*), 1.41 (s, 3H, C12/13H<sub>3</sub>), 1.35 (s, 3H, C12/13H<sub>3</sub>\*), 1.32–1.20 (m, 2H, N8'SO<sub>2</sub>CH<sub>2</sub>CH<sub>2</sub>\*), 1.23 (td,  $J = 13.8, 4.4$  Hz, 1H, N8'SO<sub>2</sub>CH<sub>2</sub>CH<sub>a</sub>), 1.16 (td,  $J = 13.7, 4.5$  Hz, 1H, N8'SO<sub>2</sub>CH<sub>2</sub>CH<sub>b</sub>), 0.10 (s, 9H, Si(CH<sub>3</sub>)<sub>3</sub>\*), 0.06 (s, 9H, Si(CH<sub>3</sub>)<sub>3</sub>).

<sup>13</sup>C NMR (150.9 MHz, CDCl<sub>3</sub>, 20 °C, 6.8:1 mixture of atropisomers, \*denotes minor atropisomer):

δ 168.2 (C1''), 166.5 (C1''\*), 149.9 (C7<sub>a</sub>), 149.5 (C7<sub>a</sub>\*), 143.3 (C3''\*), 142.3 (C3''), 139.0 (2C, C4\*, C4<sub>a</sub>\*), 138.4 (C5''\*), 138.1 (C4<sub>a</sub>'), 137.7 (C5''), 137.0 (C4), 136.0 (2C, C7<sub>a</sub>', C7<sub>a</sub>'\*), 131.2 (2C, C4<sub>a</sub>, C4<sub>a</sub>\*), 130.7 (C4''), 130.3 (C4''\*), 129.4 (C6), 129.2 (C6\*), 127.9 (C6'), 127.7 (C6'\*), 126.8 (C5'\*), 126.3 (C5'), 125.2 (C7'\*), 124.6 (C7'), 124.4 (C4'\*), 124.2 (C4'), 120.9 (C2''), 119.6 (C2''\*), 114.6 (C5\*), 113.8 (C5), 102.6 (C7), 102.3 (C7\*), 85.2 (C8<sub>a</sub>\*), 84.7 (C8<sub>a</sub>), 79.3 (C8<sub>a</sub>'), 78.6 (C8<sub>a</sub>'\*), 65.7 (C9), 65.3 (C9\*), 64.0 (C10\*), 63.9 (C10), 59.9 (2C, C11\*, C11), 54.2 (C3<sub>a</sub>), 54.1 (C3<sub>a</sub>\*), 52.7 (C3<sub>a</sub>'), 52.4 (N8'SO<sub>2</sub>CH<sub>2</sub>\*), 51.7 (N8'SO<sub>2</sub>CH<sub>2</sub>), 50.1 (C3<sub>a</sub>'\*), 45.2 (C2'\*), 44.2 (C2'), 38.1 (C2\*), 37.9 (C3\*), 37.5 (C3), 36.3 (C2), 33.3 (C3'\*), 31.4 (C3'), 31.0 (N8CH<sub>3</sub>\*), 30.9 (N8CH<sub>3</sub>), 25.0 (C12/13), 24.9 (C12/13\*), 20.7 (C12/13), 20.6 (C12/13\*), 18.9 (C6''), 18.8 (C6''\*), 10.8 (N8'SO<sub>2</sub>CH<sub>2</sub>CH<sub>2</sub>\*), 10.7 (N8'SO<sub>2</sub>CH<sub>2</sub>CH<sub>2</sub>), -1.7 (Si(CH<sub>3</sub>)<sub>3</sub>\*), -1.8 (Si(CH<sub>3</sub>)<sub>3</sub>).

FTIR (thin film) cm<sup>-1</sup>:

3055 (w), 2956 (m), 1706 (w), 1654 (m), 1627 (m), 1599 (s), 1487 (m), 1391 (s), 1338 (s), 1284 (m), 1250 (m), 1156 (s), 1052 (m), 1000 (m), 859 (m), 760 (m), 564 (m).

HRMS (ESI) ( $m/z$ ):

calc'd for C<sub>37</sub>H<sub>49</sub>N<sub>4</sub>O<sub>4</sub>SSi [M+H]<sup>+</sup>: 673.3238,  
found: 673.3216.

[α]<sub>D</sub><sup>22</sup>:

-60 ( $c = 0.74$ , CH<sub>2</sub>Cl<sub>2</sub>).

TLC (40% ethyl acetate in hexanes), R<sub>f</sub>:

0.23 (UV, CAM).

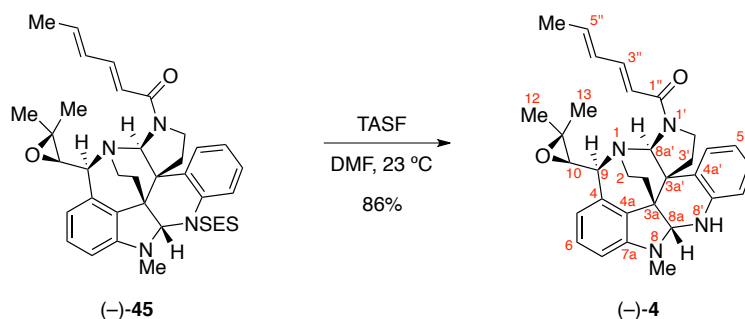

### **(-)-Communesin B (4):**

A solution of tris(dimethylamino)sulfonium difluorotrimethylsilicate (TASF, 23.3 mg, 84.6  $\mu\text{mol}$ , 4.00 equiv) in *N,N*-dimethylformamide (200  $\mu\text{L}$ ) was added to a solution of (-)-*N*8'-(trimethylsilyl)ethanesulfonyl communesin B (**45**, 14.2 mg, 21.2  $\mu\text{mol}$ , 1 equiv) in *N,N*-dimethylformamide (500  $\mu\text{L}$ ) at 23 °C. After 2 h, a saturated aqueous sodium chloride solution (10 mL) and deionized water (5 mL) were added and the mixture was extracted with ethyl acetate (3  $\times$  10 mL). The combined organic extracts were washed with a saturated aqueous sodium chloride solution (2  $\times$  15 mL), were dried over anhydrous sodium sulfate, were filtered, and were concentrated under reduced pressure. The resulting residue was purified by flash column chromatography on silica gel (eluent: 30% acetone in hexanes) to afford (-)-communesin B (**4**, 9.27 mg, 86.2%) as a white solid. Structural assignments were made using additional information from gCOSY, gHSQC, gHMBC, and 1D selective NOESY experiments.

$^1\text{H}$  NMR (500 MHz,  $\text{CDCl}_3$ , 20 °C, 11:1 mixture of atropisomers, \*denotes minor atropisomer):

$\delta$  7.31 (dd,  $J = 15.1, 10.6$  Hz, 1H, C3''H), 6.98 (ddd,  $J = 7.7, 5.9, 3.0$  Hz, 1H, C6'H), 6.88 (t,  $J = 7.7$  Hz, 1H, C6H), 6.74–6.59 (m, 3H, C4'H, C5'H, C7'H), 6.54 (d,  $J = 15.1$  Hz, 1H, C2''H), 6.19 (ddd,  $J = 14.9, 10.7, 1.6$  Hz, 1H, C4''H), 6.14–6.04 (m, 2H, C5H, C5''H), 5.95 (d,  $J = 7.8$  Hz, 1H, C7H), 5.54 (s, 1H, C8a'H\*), 5.10 (d,  $J = 1.5$  Hz, 1H, C8a'H), 4.70 (s, 1H, C8aH), 4.62 (br-s, 1H, N8'H), 4.17 (d,  $J = 9.0$  Hz, 1H, C9H), 3.87 (app-dd,  $J = 12.1, 8.3$  Hz, 1H, C2'H<sub>a</sub>), 3.53–3.36 (m, 2H, C2'H<sub>2</sub>), 3.07 (app-td,  $J = 11.8, 7.0$  Hz, 1H, C2'H<sub>b</sub>), 2.90 (d,  $J = 9.0$  Hz, 1H, C10H), 2.85 (s, 3H, N8CH<sub>3</sub>), 2.72 (app-td,  $J = 12.4, 8.4$  Hz, 1H, C3'H<sub>a</sub>), 2.37 (ddd,  $J = 13.0, 8.5, 2.2$  Hz, 1H, C3H<sub>a</sub>), 2.28 (app-dt,  $J = 12.9, 9.2$  Hz, 1H, C3H<sub>b</sub>), 1.99 (dd,  $J = 13.1, 6.9$  Hz, 1H, C3'H<sub>b</sub>), 1.85 (dd,  $J = 6.6, 1.3$  Hz, 3H, C6''H<sub>3</sub>), 1.65 (s, 3H, C13H<sub>3</sub>), 1.42 (s, 3H, C12H<sub>3</sub>), 1.37 (s, 3H, C12H<sub>3</sub>\*).

$^{13}\text{C}$  NMR (150.9 MHz,  $\text{CDCl}_3$ , 20 °C, 11:1 mixture of atropisomers, \*denotes minor atropisomer):

$\delta$  168.5 (C1''), 150.6 (C7a), 142.7 (C7a'), 141.9 (C3''), 137.3 (C5''), 136.7 (C4), 132.4 (2C, C4a, C4a'), 130.8 (C4''), 129.0 (C6), 127.5 (C6'), 123.5 (C4'), 121.4 (C2''), 120.7 (C5'), 116.9 (C7'), 113.4 (C5), 102.0 (C7), 82.5 (C8a), 79.1 (C8a'), 65.7 (C9), 64.1 (C10), 59.9 (C11), 52.3 (C3a'), 51.5 (C3a), 44.3 (C2'), 38.0 (C3), 36.2 (C2), 30.6 (C3'), 29.7 (N8CH<sub>3</sub>), 25.0 (C12), 24.9 (C12\*), 20.7 (C13), 18.9 (C6''), 18.8 (C6''\*).

|                                       |                                                                                                                                               |
|---------------------------------------|-----------------------------------------------------------------------------------------------------------------------------------------------|
| FTIR (thin film) $\text{cm}^{-1}$ :   | 3319 (br-w), 3052 (w), 2960 (m), 2926 (m), 2877 (m), 1652 (m), 1625 (m), 1594 (s), 1493 (m), 1474 (m), 1389 (s), 1152 (m), 1000 (s), 737 (m). |
| HRMS (ESI) ( $m/z$ ):                 | calc'd for $\text{C}_{32}\text{H}_{37}\text{N}_4\text{O}_2$ $[\text{M}+\text{H}]^+$ : 509.2911, found: 509.2906.                              |
| $[\alpha]_{\text{D}}^{23}$ :          | $-64$ ( $c = 0.46$ , $\text{CHCl}_3$ ). <sup>44</sup>                                                                                         |
| TLC (30% acetone in hexanes), $R_f$ : | 0.20 (UV, CAM).                                                                                                                               |

---

44. (a) Literature value:  $[\alpha]_{\text{D}}^{22} = +8.7$  ( $c = 0.23$ ,  $\text{CHCl}_3$ ), see Numata, A.; Takahashi, C.; Ito, Y.; Takada, T.; Kawai, K.; Usami, Y.; Matsumura, E.; Imachi, M.; Ito, T.; Hasegawa, T. *Tetrahedron Lett.* **1993**, *34*, 2355. (b) Literature value:  $[\alpha]_{\text{D}} = -58$  ( $c = 0.10$ , MeOH), see Jadulco, R.; Edrada, R. A.; Ebel, R.; Berg, A.; Schaumann, K.; Wray, V.; Steube, K.; Proksch, P. *J. Nat. Prod.* **2004**, *67*, 78. (c) Literature value:  $[\alpha]_{\text{D}}^{20} = -74.9$  ( $c = 1.50$ ,  $\text{CHCl}_3$ ), see Hayashi, H.; Matsumoto, H.; Akiyama, K. *Biosci. Biotechnol. Biochem.* **2004**, *68*, 753. (d) Literature value:  $[\alpha]_{\text{D}}^{30} = -51.3$  ( $c = 0.30$ ,  $\text{CHCl}_3$ ), see Zuo, Z.; Ma, D. *Angew. Chem. Int. Ed.* **2011**, *50*, 12008.



**Table S5. Comparison of our <sup>1</sup>H NMR data for (–)-communesin B (4) with literature data (CDCl<sub>3</sub>, major atropisomer):**

| Assignment        | Numata's Isolation Report <sup>45,46</sup><br>(–)-Communesin B (4)<br><sup>1</sup> H NMR, 300 MHz, CDCl <sub>3</sub> | Hayashi's Isolation Report <sup>47,48</sup><br>(–)-Communesin B (4)<br><sup>1</sup> H NMR, CDCl <sub>3</sub> | Ma's Report <sup>49</sup><br>(–)-Communesin B (4)<br><sup>1</sup> H NMR, 400 MHz, CDCl <sub>3</sub> | This Work<br>(–)-Communesin B (4)<br><sup>1</sup> H NMR, 500 MHz, CDCl <sub>3</sub>        |
|-------------------|----------------------------------------------------------------------------------------------------------------------|--------------------------------------------------------------------------------------------------------------|-----------------------------------------------------------------------------------------------------|--------------------------------------------------------------------------------------------|
| C2                | 3.48 (dd, <i>J</i> = 16.0, 9.2 Hz, 1H)<br>3.40 (dt, <i>J</i> = 16.0, 8.5 Hz, 1H)                                     | 3.47 (ddt, <i>J</i> = 15.9, 9.0, 1.0 Hz, 1H)<br>3.41 (ddd, <i>J</i> = 15.9, 9.8, 8.0 Hz, 1H)                 | 3.51–3.38 (m, 2H)                                                                                   | 3.53–3.36 (m, 2H)                                                                          |
| C3                | 2.34 (ddd, <i>J</i> = 12.8, 9.2, 8.5 Hz, 1H)<br>2.25 (dd, <i>J</i> = 12.8, 8.5 Hz, 1H)                               | 2.37 (ddd, <i>J</i> = 12.8, 8.0, 1.0 Hz, 1H)<br>2.28 (dt, <i>J</i> = 12.8, 9.0 Hz, 1H)                       | 2.39–2.33 (m, 1H)<br>2.31–2.24 (m, 1H)                                                              | 2.37 (ddd, <i>J</i> = 13.0, 8.5, 2.2 Hz, 1H)<br>2.28 (app-dt, <i>J</i> = 12.9, 9.2 Hz, 1H) |
| C3a               | –                                                                                                                    | –                                                                                                            | –                                                                                                   | –                                                                                          |
| C4a               | –                                                                                                                    | –                                                                                                            | –                                                                                                   | –                                                                                          |
| C4                | –                                                                                                                    | –                                                                                                            | –                                                                                                   | –                                                                                          |
| C5                | 6.08 (d, <i>J</i> = 7.8 Hz, 1H)                                                                                      | 6.08 (d, <i>J</i> = 7.6 Hz, 1H)                                                                              | 6.14–6.08 (m, 2H)                                                                                   | 6.14–6.04 (m, 2H)                                                                          |
| C6                | 6.87 (t, <i>J</i> = 7.8 Hz, 1H)                                                                                      | 6.88 (t, <i>J</i> = 7.6 Hz, 1H)                                                                              | 6.89 (t, <i>J</i> = 7.5 Hz, 1H)                                                                     | 6.88 (t, <i>J</i> = 7.7 Hz, 1H)                                                            |
| C7                | 5.95 (d, <i>J</i> = 7.8 Hz, 1H)                                                                                      | 5.95 (d, <i>J</i> = 7.6 Hz, 1H)                                                                              | 5.95 (d, <i>J</i> = 8.0 Hz, 1H)                                                                     | 5.95 (d, <i>J</i> = 7.8 Hz, 1H)                                                            |
| C7a               | –                                                                                                                    | –                                                                                                            | –                                                                                                   | –                                                                                          |
| N8CH <sub>3</sub> | 2.85 (s, 3H)                                                                                                         | 2.85 (s, 3H)                                                                                                 | 2.85 (s, 3H)                                                                                        | 2.85 (s, 3H)                                                                               |
| C8a               | 4.70 (s, 1H)                                                                                                         | 4.70 (s, 1H)                                                                                                 | 4.70 (s, 1H)                                                                                        | 4.70 (s, 1H)                                                                               |
| C9                | 4.18 (d, <i>J</i> = 9.0 Hz, 1H)                                                                                      | 4.18 (d, <i>J</i> = 9.0 Hz, 1H)                                                                              | 4.18 (d, <i>J</i> = 9.0 Hz, 1H)                                                                     | 4.17 (d, <i>J</i> = 9.0 Hz, 1H)                                                            |
| C10               | 2.90 (d, <i>J</i> = 9.0 Hz, 1H)                                                                                      | 2.90 (d, <i>J</i> = 9.0 Hz, 1H)                                                                              | 2.90 (d, <i>J</i> = 9.0 Hz, 1H)                                                                     | 2.90 (d, <i>J</i> = 9.0 Hz, 1H)                                                            |
| C11               | –                                                                                                                    | –                                                                                                            | –                                                                                                   | –                                                                                          |
| C12               | 1.42 (s, 3H)                                                                                                         | 1.42 (s, 3H)                                                                                                 | 1.42 (s, 3H)                                                                                        | 1.42 (s, 3H)                                                                               |
| C13               | 1.65 (s, 3H)                                                                                                         | 1.65 (s, 3H)                                                                                                 | 1.65 (s, 3H)                                                                                        | 1.65 (s, 3H)                                                                               |
| C2'               | 3.87 (dd, <i>J</i> = 12.5, 8.4 Hz, 1H)<br>3.07 (td, <i>J</i> = 12.5, 7.0 Hz, 1H)                                     | 3.87 (dd, <i>J</i> = 11.9, 8.5 Hz, 1H)<br>3.07 (dt, <i>J</i> = 11.9, 7.0 Hz, 1H)                             | 3.88 (dd, <i>J</i> = 12.0, 9.0 Hz, 1H)<br>3.07 (td, <i>J</i> = 11.5, 7.0 Hz, 1H)                    | 3.87 (dd, <i>J</i> = 12.1, 8.3 Hz, 1H)<br>3.07 (app-td, <i>J</i> = 11.8, 7.0 Hz, 1H)       |
| C3'               | 2.71 (td, <i>J</i> = 12.5, 8.4 Hz, 1H)<br>2.00 (dd, <i>J</i> = 12.5, 7.0 Hz, 1H)                                     | 2.72 (ddd, <i>J</i> = 13.1, 11.9, 8.5 Hz, 1H)<br>2.00 (dd, <i>J</i> = 13.1, 7.0 Hz, 1H)                      | 2.76–2.68 (m, 1H)<br>2.00 (dd, <i>J</i> = 13.2, 6.8 Hz, 1H)                                         | 2.72 (app-td, <i>J</i> = 12.4, 8.4 Hz, 1H)<br>1.99 (dd, <i>J</i> = 13.1, 6.9 Hz, 1H)       |
| C3a'              | –                                                                                                                    | –                                                                                                            | –                                                                                                   | –                                                                                          |

45. Numata, A.; Takahashi, C.; Ito, Y.; Takada, T.; Kawai, K.; Usami, Y.; Matsumura, E.; Imachi, M.; Ito, T.; Hasegawa, T. *Tetrahedron Lett.* **1993**, *34*, 2355.

46. The reference points for the residual protium and carbon resonances of the NMR solvent were not listed.

47. Hayashi, H.; Matsumoto, H.; Akiyama, K. *Biosci. Biotechnol. Biochem.* **2004**, *68*, 753.

48. Resonance frequencies and reference points for the residual protium and carbon resonances of the NMR solvent were not listed.

49. Zuo, Z.; Ma, D. *Angew. Chem. Int. Ed.* **2011**, *50*, 12008.

|      |                                        |                                        |                                    |                                          |
|------|----------------------------------------|----------------------------------------|------------------------------------|------------------------------------------|
| C4a' | –                                      | –                                      | –                                  | –                                        |
| C4'  | 6.66 (d, $J = 3.5$ Hz, 1H)             | 6.65 (m, 3H)                           | 6.68–6.66 (m, 3H)                  | 6.74–6.59 (m, 3H)                        |
| C5'  | 6.67 (d, $J = 7.8$ Hz, 1H)             | 6.65 (m, 3H)                           | 6.68–6.66 (m, 3H)                  | 6.74–6.59 (m, 3H)                        |
| C6'  | 6.98 (ddd, $J = 7.8, 5.2, 3.5$ Hz, 1H) | 6.98 (ddd, $J = 7.6, 5.8, 3.3$ Hz, 1H) | 7.00–6.97 (m, 1H)                  | 6.98 (ddd, $J = 7.7, 5.9, 3.0$ Hz, 1H)   |
| C7'  | 6.66 (d, $J = 5.2$ Hz, 1H)             | 6.65 (m, 3H)                           | 6.68–6.66 (m, 3H)                  | 6.74–6.59 (m, 3H)                        |
| C7a' | –                                      | –                                      | –                                  | –                                        |
| C8a' | 5.11 (s, 1H)                           | 5.10 (s, 1H)                           | 5.11 (s, 1H)                       | 5.10 (d, $J = 1.5$ Hz, 1H)               |
| C1'' | –                                      | –                                      | –                                  | –                                        |
| C2'' | 6.55 (d, $J = 15.2$ Hz, 1H)            | 6.55 (d, $J = 15.0$ Hz, 1H)            | 6.55 (d, $J = 15.0$ Hz, 1H)        | 6.54 (d, $J = 15.1$ Hz, 1H)              |
| C3'' | 7.32 (dd, $J = 15.2, 10.1$ Hz, 1H)     | 7.32 (dd, $J = 15.0, 10.4$ Hz, 1H)     | 7.31 (dd, $J = 15.5, 10.5$ Hz, 1H) | 7.31 (dd, $J = 15.1, 10.6$ Hz, 1H)       |
| C4'' | 6.18 (dd, $J = 15.5, 10.1$ Hz, 1H)     | 6.19 (dd, $J = 15.0, 10.4$ Hz, 1H)     | 6.19 (dd, $J = 15.0, 9.0$ Hz, 1H)  | 6.19 (ddd, $J = 14.9, 10.7, 1.6$ Hz, 1H) |
| C5'' | 6.12 (dd, $J = 15.5, 5.8$ Hz, 1H)      | 6.12 (dq, $J = 15.0, 6.7$ Hz, 1H)      | 6.14–6.08 (m, 2H)                  | 6.14–6.04 (m, 2H)                        |
| C6'' | 1.85 (d, $J = 5.8$ Hz, 1H)             | 1.85 (d, $J = 6.7$ Hz, 1H)             | 1.85 (d, $J = 6.4$ Hz, 1H)         | 1.85 (dd, $J = 6.6, 1.3$ Hz, 3H)         |
| N8'H | 4.60 (br-s, 1H)                        | 4.62 (br-s, 1H)                        | –                                  | 4.62 (br-s, 1H)                          |

**Table S6. Comparison of our  $^{13}\text{C}$  NMR data for (–)-communesin B (4) with literature data ( $\text{CDCl}_3$ , major atropisomer):**

| Assignment        | Numata's Isolation Report <sup>45,46</sup><br>(–)-Communesin B (4)<br>$^{13}\text{C}$ NMR, 75.4 MHz, $\text{CDCl}_3$ | Hayashi's Isolation Report <sup>47,48</sup><br>(–)-Communesin B (4)<br>$^1\text{H}$ NMR, $\text{CDCl}_3$ | Ma's Report <sup>49</sup><br>(–)-Communesin B (4)<br>$^{13}\text{C}$ NMR, 100 MHz, $\text{CDCl}_3$ | This Work<br>(–)-Communesin B (4)<br>$^{13}\text{C}$ NMR, 150.9 MHz,<br>$\text{CDCl}_3$ | Chemical Shift Difference<br>$\Delta\delta = \delta$ (this work) –<br>$\delta$ (Numata's report) |
|-------------------|----------------------------------------------------------------------------------------------------------------------|----------------------------------------------------------------------------------------------------------|----------------------------------------------------------------------------------------------------|-----------------------------------------------------------------------------------------|--------------------------------------------------------------------------------------------------|
| C2                | 36.03                                                                                                                | 35.9                                                                                                     | 36.0                                                                                               | 36.16                                                                                   | 0.13                                                                                             |
| C3                | 37.82                                                                                                                | 37.7                                                                                                     | 37.8                                                                                               | 37.96                                                                                   | 0.14                                                                                             |
| C3a               | 51.40                                                                                                                | 51.3                                                                                                     | 51.4                                                                                               | 51.52                                                                                   | 0.12                                                                                             |
| C4a               | 132.35                                                                                                               | 132.1                                                                                                    | 132.2                                                                                              | 132.45                                                                                  | 0.10                                                                                             |
| C4                | 136.57                                                                                                               | 136.4                                                                                                    | 136.6                                                                                              | 136.69                                                                                  | 0.12                                                                                             |
| C5                | 113.23                                                                                                               | 113.1                                                                                                    | 113.2                                                                                              | 113.35                                                                                  | 0.12                                                                                             |
| C6                | 128.87                                                                                                               | 128.8                                                                                                    | 128.9                                                                                              | 128.98                                                                                  | 0.11                                                                                             |
| C7                | 101.85                                                                                                               | 101.7                                                                                                    | 101.9                                                                                              | 101.97                                                                                  | 0.12                                                                                             |
| C7a               | 150.53                                                                                                               | 150.4                                                                                                    | 150.5                                                                                              | 150.62                                                                                  | 0.09                                                                                             |
| N8CH <sub>3</sub> | 29.60                                                                                                                | 29.5                                                                                                     | 29.6                                                                                               | 29.74                                                                                   | 0.14                                                                                             |
| C8a               | 82.39                                                                                                                | 82.3                                                                                                     | 82.4                                                                                               | 82.52                                                                                   | 0.13                                                                                             |
| C9                | 65.55                                                                                                                | 65.4                                                                                                     | 65.6                                                                                               | 65.67                                                                                   | 0.12                                                                                             |
| C10               | 63.95                                                                                                                | 63.8                                                                                                     | 64.0                                                                                               | 64.07                                                                                   | 0.12                                                                                             |
| C11               | 59.75                                                                                                                | 59.7                                                                                                     | 59.8                                                                                               | 59.87                                                                                   | 0.12                                                                                             |
| C12               | 24.89                                                                                                                | 24.8                                                                                                     | 24.9                                                                                               | 25.02                                                                                   | 0.13                                                                                             |
| C13               | 20.54                                                                                                                | 20.5                                                                                                     | 20.5                                                                                               | 20.68                                                                                   | 0.14                                                                                             |
| C2'               | 44.21                                                                                                                | 44.1                                                                                                     | 44.2                                                                                               | 44.33                                                                                   | 0.12                                                                                             |
| C3'               | 30.46                                                                                                                | 30.3                                                                                                     | 30.5                                                                                               | 30.58                                                                                   | 0.12                                                                                             |
| C3a'              | 52.14                                                                                                                | 52.0                                                                                                     | 52.1                                                                                               | 52.26                                                                                   | 0.12                                                                                             |
| C4a'              | 132.32                                                                                                               | 132.2                                                                                                    | 132.2                                                                                              | 132.36                                                                                  | 0.04                                                                                             |
| C4'               | 123.41                                                                                                               | 123.3                                                                                                    | 123.4                                                                                              | 123.55                                                                                  | 0.14                                                                                             |
| C5'               | 120.52                                                                                                               | 120.4                                                                                                    | 120.5                                                                                              | 120.65                                                                                  | 0.13                                                                                             |
| C6'               | 127.38                                                                                                               | 127.3                                                                                                    | 127.4                                                                                              | 127.49                                                                                  | 0.11                                                                                             |
| C7'               | 116.82                                                                                                               | 116.7                                                                                                    | 116.8                                                                                              | 116.93                                                                                  | 0.11                                                                                             |
| C7a'              | 142.65                                                                                                               | 142.5                                                                                                    | 142.7                                                                                              | 142.75                                                                                  | 0.10                                                                                             |
| C8a'              | 79.00                                                                                                                | 78.9                                                                                                     | 79.0                                                                                               | 79.11                                                                                   | 0.11                                                                                             |
| C1''              | 168.43                                                                                                               | 168.3                                                                                                    | 168.4                                                                                              | 168.52                                                                                  | 0.09                                                                                             |
| C2''              | 121.27                                                                                                               | 121.1                                                                                                    | 121.3                                                                                              | 121.39                                                                                  | 0.12                                                                                             |
| C3''              | 141.83                                                                                                               | 141.7                                                                                                    | 141.8                                                                                              | 141.93                                                                                  | 0.10                                                                                             |
| C4''              | 130.72                                                                                                               | 130.6                                                                                                    | 130.7                                                                                              | 130.84                                                                                  | 0.12                                                                                             |
| C5''              | 137.13                                                                                                               | 137.1                                                                                                    | 137.2                                                                                              | 137.26                                                                                  | 0.13                                                                                             |
| C6''              | 18.71                                                                                                                | 18.7                                                                                                     | 18.7                                                                                               | 18.85                                                                                   | 0.14                                                                                             |

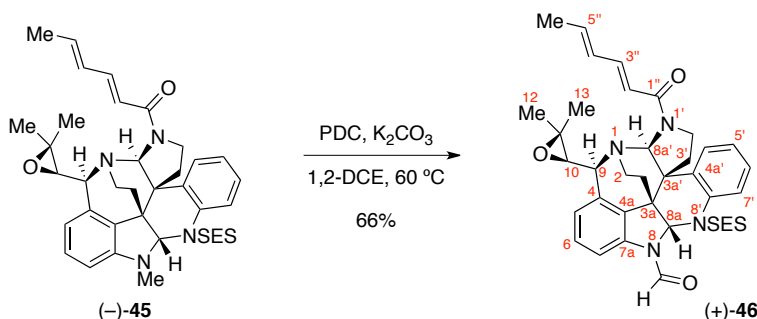

**(+)-N8'-(Trimethylsilyl)ethanesulfonyl communesin D (46):**

Samples of crushed potassium carbonate (161 mg, 1.17 mmol, 40.0 equiv) and pyridinium dichromate (PDC, 87.7 mg, 233  $\mu$ mol, 8.00 equiv) were added sequentially to a solution of (–)-N8'-(trimethylsilyl)ethanesulfonyl communesin B (**45**, 19.6 mg, 29.1  $\mu$ mol, 1 equiv) in 1,2-dichloroethane (1.90 mL) at 23 °C. The flask was sealed with a Teflon-lined glass stopper under an atmosphere of argon and was immersed in a preheated oil bath at 60 °C. After stirring for 7 h, the brown suspension was cooled to 23 °C, was diluted with dichloromethane (5 mL), and was filtered through a pad of silica gel covered with a pad of Celite. The filter cake was washed with acetone–hexanes (1:1, 65 mL) and the colorless filtrate was concentrated under reduced pressure. The resulting residue was purified by flash column chromatography on silica gel (eluent: 40% ethyl acetate in hexanes) to afford (+)-N8'-(trimethylsilyl)ethanesulfonyl communesin D (**46**, 13.2 mg, 66.0%) as an off-white solid.

$^1\text{H}$  NMR (500 MHz,  $\text{CDCl}_3$ , 20 °C, mixture of atropisomers, \*denotes minor atropisomers):<sup>50</sup>  $\delta$  8.87\* (s, 1H), 8.83\* (s, 1H), 8.82 (s, 1H), 8.81\* (s, 1H), 7.33 (dd,  $J = 15.1, 10.1$  Hz, 1H), 7.23–7.13 (m, 2H), 7.11–7.00 (m, 2H), 6.88–6.72 (m, 2H), 6.68–6.59 (m, 1H), 6.51–6.36 (m, 2H), 6.25–6.04 (m, 2H), 5.54\* (s, 1H), 5.51\* (s, 1H), 5.28\* (s, 1H), 5.18\* (s, 1H), 5.15\* (s, 1H), 5.09 (s, 1H), 4.63\* (d,  $J = 6.6$  Hz, 1H), 4.27 (d,  $J = 8.2$  Hz, 1H), 4.12 (td,  $J = 13.7, 3.7$  Hz, 1H), 3.98–3.83 (m, 1H), 3.60–3.35 (m, 3H), 3.30\* (q,  $J = 10.1$  Hz, 1H), 3.23\* (dd,  $J = 10.2, 7.6$  Hz, 1H), 3.14 (td,  $J = 12.0, 7.3$  Hz, 1H), 3.03\* (dt,  $J = 12.7, 9.5$  Hz, 1H), 2.82 (d,  $J = 9.0$  Hz, 1H), 2.80–2.75\* (m, 1H), 2.72\* (d,  $J = 8.7$  Hz, 1H), 2.71–2.63 (m, 1H), 2.48–2.40\* (m, 1H), 2.39–2.24 (m, 2H), 1.85 (d,  $J = 5.6$  Hz, 3H), 1.84\* (d,  $J = 6.1$  Hz, 3H), 1.65 (s, 3H), 1.58\* (s, 3H), 1.41 (s, 3H), 1.34\* (s, 3H), 1.32–1.13 (m, 2H), 0.15 (s, 9H), 0.08\* (s, 9H\*).

$^{13}\text{C}$  NMR (150.9 MHz,  $\text{CDCl}_3$ , 20 °C, mixture of atropisomers):<sup>51</sup>  $\delta$  168.0, 166.5, 160.6, 159.3, 143.3, 142.7, 142.6, 142.4, 140.2, 139.9, 139.4, 139.2, 138.6, 138.4, 137.8, 135.6, 135.5, 134.5, 134.3, 130.7, 130.4, 129.5, 129.4, 129.2, 128.5, 128.0, 127.9, 127.3, 127.1 (2C), 126.4, 124.7, 124.4, 124.2, 124.0, 123.7, 122.7, 122.1, 120.9, 120.7, 119.6, 114.5, 107.1, 106.6, 79.1, 78.5, 77.4, 76.9, 76.6, 65.4, 65.1, 63.9, 63.7, 59.8, 59.7, 54.8, 54.6, 52.9, 52.7, 52.5, 49.8, 45.2, 44.4, 37.8, 37.1,

50. The reported integrals are an approximation due to the presence of multiple conformers and significant atropisomerism.

51. More than the expected 37  $^{13}\text{C}$  resonances were observed due to the presence of multiple atropisomers. All observed resonances are listed.

36.7, 36.1, 32.5, 31.0, 30.6, 29.8, 24.9 (2C), 24.8, 20.7,  
20.6 (2C), 18.8, 18.7, 10.9, 10.8, -1.7, -1.8.

FTIR (thin film)  $\text{cm}^{-1}$ :

2956 (m), 2899 (m), 1685 (s), 1656 (s), 1629 (s), 1595  
(s), 1486 (s), 1469 (s), 1390 (s), 1343 (s), 1295 (m),  
1251 (m), 1158 (s), 1093 (m), 1002 (m), 898 (m), 860 (s).

HRMS (ESI) ( $m/z$ ):

calc'd for  $\text{C}_{37}\text{H}_{47}\text{N}_4\text{O}_5\text{SSi}$   $[\text{M}+\text{H}]^+$ : 687.3031,  
found: 687.3029.

$[\alpha]_{\text{D}}^{24}$ :

+30 ( $c = 0.66$ ,  $\text{CH}_2\text{Cl}_2$ ).

TLC (50% ethyl acetate in hexanes),  $R_f$ :

0.26 (UV, CAM).

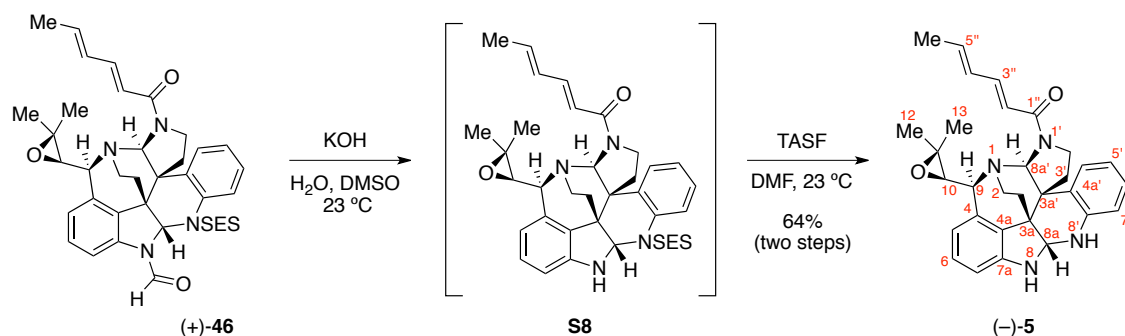

### **(-)-Communesin C (5):**

An aqueous potassium hydroxide solution (0.5 M, 175  $\mu$ L, 87.3  $\mu$ mol, 5.00 equiv) was added rapidly to a solution of (+)-*N*8'-(trimethylsilyl)ethanesulfonyl communesin D (**46**, 12.0 mg, 17.5  $\mu$ mol, 1 equiv) in dimethyl sulfoxide (1.75 mL) and deionized water (175  $\mu$ L) at 23  $^{\circ}$ C. After 21 min, the light-orange homogeneous solution was diluted with a saturated aqueous sodium chloride solution (20 mL) and the mixture was extracted with ethyl acetate ( $3 \times 10$  mL). The combined organic extracts were washed with a saturated aqueous sodium chloride solution ( $2 \times 20$  mL), were dried over anhydrous sodium sulfate, were filtered, and were concentrated under reduced pressure. The resulting residue was filtered through a plug of silica gel (eluent: ethyl acetate) to afford crude sulfonamide **S8** as a pale-yellow solid, which was used directly in the next step without further purification.

A degassed solution of tris(dimethylamino)sulfonium difluorotrimethylsilicate (TASF, 19.3 mg, 70.0  $\mu$ mol, 4.00 equiv) in *N,N*-dimethylformamide (180  $\mu$ L) was added to a degassed solution of crude sulfonamide **S8** (1 equiv) in *N,N*-dimethylformamide (400  $\mu$ L) at 23  $^{\circ}$ C. After 2 h, an additional portion of TASF (9.6 mg, 35  $\mu$ mol, 2.0 equiv) in *N,N*-dimethylformamide (90  $\mu$ L) was added. After 1 h, a saturated aqueous sodium chloride solution (10 mL) and deionized water (5 mL) were added and the mixture was extracted with ethyl acetate ( $3 \times 10$  mL). The combined organic extracts were washed with a saturated aqueous sodium chloride solution ( $2 \times 15$  mL), were dried over anhydrous sodium sulfate, were filtered, and were concentrated under reduced pressure. The resulting residue was purified by flash column chromatography on silica gel (eluent: 30% $\rightarrow$ 40% acetone in hexanes) to afford (-)-communesin C (**5**, 5.53 mg, 63.8% over two steps) as a white solid. Structural assignments were made using additional information from gCOSY, gHSQC, gHMBC, and 1D selective NOESY experiments.

$^1$ H NMR (500 MHz, DMSO- $d_6$ , 20  $^{\circ}$ C, 11:1 mixture of atropisomers, major atropisomer):

$\delta$  7.07 (dd,  $J = 15.2, 9.7$  Hz, 1H), 6.92 (ddd,  $J = 7.8, 6.2, 2.6$  Hz, 1H), 6.74 (t,  $J = 7.6$  Hz, 1H), 6.70 (d,  $J = 7.9$  Hz, 1H), 6.61–6.55 (m, 2H), 6.53 (d,  $J = 15.1$  Hz, 1H), 6.21–6.12 (m, 2H), 6.11 (d,  $J = 7.5$  Hz, 1H), 6.05 (d,  $J = 7.6$  Hz, 1H), 6.03 (d,  $J = 1.5$  Hz, 1H), 5.85 (d,  $J = 1.4$  Hz, 1H), 5.14 (d,  $J = 1.4$  Hz, 1H), 4.84 (s, 1H), 4.19 (d,  $J = 9.0$  Hz, 1H), 3.72 (dd,  $J = 11.2, 7.7$  Hz, 1H), 3.30 (dd,  $J = 15.5, 9.8$  Hz, 1H), 3.19 (dt,  $J = 15.4, 8.6$  Hz, 1H), 2.90 (d,  $J = 9.2$  Hz, 1H), 2.79 (td,  $J = 11.3, 6.6$  Hz, 1H), 2.70 (td,  $J = 12.3, 8.1$  Hz, 1H), 2.28 (td,  $J = 8.9, 4.2$  Hz, 1H), 2.10 (dt,  $J = 12.8, 9.8$  Hz, 1H), 1.82 (d,  $J = 5.3$  Hz, 3H), 1.73–1.64 (m, 1H), 1.58 (s, 3H), 1.33 (s, 3H).

$^1$ H NMR (600 MHz, CDCl $_3$ , 20  $^{\circ}$ C, 15:1 mixture of atropisomers, \*denotes minor atropisomer):

$\delta$  7.32 (dd,  $J = 15.1, 10.8$  Hz, 2H, C3''**H**, C3''**H**\*), 6.99 (ddd,  $J = 7.6, 5.4, 3.6$  Hz, 2H, C6'**H**, C6'**H**\*), 6.85 (app-t,  $J = 7.7$  Hz, 1H, C6**H**), 6.70–6.64 (m, 6H, C4'**H**, C4'**H**\*),

$^1\text{H}$  NMR ( $400\text{ MHz}$ ,  $\text{CDCl}_3$ ,  $20\text{ }^\circ\text{C}$ ):  $\delta$  6.57 (d,  $J = 14.8\text{ Hz}$ , 1H, C2''H), 6.25–6.15 (m, 6H, C5H, C5H\*, C7H, C7H\*, C4''H, C5''H\*), 6.14–6.04 (m, 3H, C2''H\*, C4''H\*, C5''H), 5.50 (s, 1H, C8a'H\*), 5.12 (s, 1H, C8a'H), 5.01 (s, 1H, C8a'H), 4.57–4.51 (m, 1H, C9H\*), 4.28 (br-s, 1H, N8H/N8''H), 4.19 (br-s, 1H, N8H/N8''H), 4.18 (d,  $J = 9.1\text{ Hz}$ , 1H, C9H), 3.88 (app-dd,  $J = 12.3, 8.2\text{ Hz}$ , 1H, C2'H<sub>a</sub>), 3.83 (app-t,  $J = 9.2\text{ Hz}$ , 1H, C2'H<sub>a</sub>\*), 3.57–3.49 (m, 1H, C2'H<sub>a</sub>\*), 3.50–3.38 (m, 2H, C2'H<sub>2</sub>), 3.42–3.33 (m, 1H, C2'H<sub>b</sub>\*), 3.22–3.15 (m, 1H, C2'H<sub>b</sub>\*), 3.09 (app-td,  $J = 12.0, 7.2\text{ Hz}$ , 1H, C2'H<sub>b</sub>), 2.97–2.91 (m, 1H, C3'H<sub>a</sub>\*), 2.89 (d,  $J = 9.1\text{ Hz}$ , 1H, C10H), 2.80 (d,  $J = 8.7\text{ Hz}$ , 1H, C10H\*), 2.72 (app-td,  $J = 12.9, 8.7\text{ Hz}$ , 1H, C3'H<sub>a</sub>), 2.41–2.35 (m, 2H, C3'H<sub>a</sub>, C3'H<sub>a</sub>\*), 2.29 (app-dt,  $J = 13.0, 9.3\text{ Hz}$ , 2H, C3'H<sub>b</sub>, C3'H<sub>b</sub>\*), 2.03 (app-dd,  $J = 13.4, 6.8\text{ Hz}$ , 1H, C3'H<sub>b</sub>\*), 1.97 (app-dd,  $J = 12.8, 6.7\text{ Hz}$ , 1H, C3'H<sub>b</sub>), 1.85 (d,  $J = 6.8\text{ Hz}$ , 3H, C6''H<sub>3</sub>), 1.83 (d,  $J = 6.6\text{ Hz}$ , 3H, C6''H<sub>3</sub>\*), 1.65 (s, 3H, C13H<sub>3</sub>), 1.62 (s, 3H, C13H<sub>3</sub>\*), 1.42 (s, 3H, C12H<sub>3</sub>), 1.37 (s, 3H, C12H<sub>3</sub>\*).

$^{13}\text{C}$  NMR ( $150.9\text{ MHz}$ ,  $\text{CDCl}_3$ ,  $20\text{ }^\circ\text{C}$ , 15:1 mixture of atropisomers, \*denotes minor atropisomer):

$\delta$  168.6 (C1''), 149.8 (C7a), 142.9 (C3''\*), 142.6 (C7a'), 142.0 (C3''), 137.4 (C4), 137.3 (C5''), 137.2 (C5''\*), 133.0 (C4a), 131.7 (C4a'), 130.9 (2C, C4'', C4''\*), 128.8 (C6), 127.4 (2C, C6', C6'\*), 123.8 (C4'\*), 123.5 (C4'), 121.4 (C2''), 120.5 (C5'), 120.0 (C2''\*), 117.2 (C7'\*), 116.9 (C7'), 116.1 (C5\*), 115.4 (C5), 106.3 (C7), 105.9 (C7\*), 79.3 (C8a'), 78.4 (C8a'\*), 77.1 (C8a), 65.7 (C9), 65.2 (C9\*), 64.3 (C10\*), 64.1 (C10), 59.9 (C11), 52.5 (C3a), 52.2 (C3a'), 45.3 (C2'\*), 44.4 (C2'), 38.7 (C3'), 38.0 (C3), 37.8 (C2\*), 36.0 (C2), 32.5 (C3'\*), 30.5 (C3'), 25.0 (C12), 24.9 (C12\*), 20.6 (2C, C13, C13\*), 18.8 (2C, C6'', C6''\*).

FTIR (thin film)  $\text{cm}^{-1}$ :

3342 (br-m), 3054 (w), 3022 (w), 2963 (m), 2927 (m), 2878 (m), 1651 (s), 1624 (s), 1596 (s), 1482 (m), 1461 (m), 1400 (s), 1338 (m), 1250 (m), 1165 (m), 1062 (m), 1002 (m), 748 (m).

HRMS (ESI) ( $m/z$ ):

calc'd for  $\text{C}_{31}\text{H}_{35}\text{N}_4\text{O}_2$   $[\text{M}+\text{H}]^+$ : 495.2755,  
found: 495.2760.

$[\alpha]_{\text{D}}^{23}$ :

$-108$  ( $c = 0.28$ , MeOH).<sup>52</sup>

TLC (40% acetone in hexanes),  $R_f$ :

0.26 (UV, CAM).

52. Literature value:  $[\alpha]_{\text{D}} = -30$  ( $c = 0.038$ , MeOH), see Jadulco, R.; Edrada, R. U.; Ebel, R.; Berg, A.; Schaumann, K.; Wray, V.; Steube, K.; Proksch, P. *J. Nat. Prod.* **2004**, *67*, 78.

**Table S7. Comparison of our <sup>1</sup>H NMR data for (–)-communesin C (5) with literature data (DMSO-*d*<sub>6</sub>, major atropisomer):**

| Assignment | Proksch Isolation Report <sup>53,54</sup><br>(–)-Communesin C (5)<br><sup>1</sup> H NMR, 500 MHz, DMSO- <i>d</i> <sub>6</sub> | This Work<br>(–)-Communesin C (5)<br><sup>1</sup> H NMR, 500 MHz, DMSO- <i>d</i> <sub>6</sub> |
|------------|-------------------------------------------------------------------------------------------------------------------------------|-----------------------------------------------------------------------------------------------|
| C2         | – <sup>55</sup>                                                                                                               | 3.30 (dd, <i>J</i> = 15.5, 9.8 Hz, 1H)<br>3.19 (dt, <i>J</i> = 15.4, 8.6 Hz, 1H)              |
| C3         | 2.27 (m, 1H)<br>2.09 (m, 1H)                                                                                                  | 2.28 (td, <i>J</i> = 8.9, 4.2 Hz, 1H)<br>2.10 (dt, <i>J</i> = 12.8, 9.8 Hz, 1H)               |
| C3a        | –                                                                                                                             | –                                                                                             |
| C4a        | –                                                                                                                             | –                                                                                             |
| C4         | –                                                                                                                             | –                                                                                             |
| C5         | 6.10 (d, <i>J</i> = 7.7 Hz, 1H)                                                                                               | 6.11 (d, <i>J</i> = 7.5 Hz, 1H)                                                               |
| C6         | 6.74 (dd, <i>J</i> = 8.2, 7.7 Hz, 1H)                                                                                         | 6.74 (t, <i>J</i> = 7.6 Hz, 1H)                                                               |
| C7         | 6.03 (d, <i>J</i> = 8.2 Hz, 1H)                                                                                               | 6.05 (d, <i>J</i> = 7.6 Hz, 1H)                                                               |
| C7a        | –                                                                                                                             | –                                                                                             |
| C8a        | 4.83 (s, 1H)                                                                                                                  | 4.84 (s, 1H)                                                                                  |
| C9         | 4.18 (d, <i>J</i> = 9.2 Hz, 1H)                                                                                               | 4.19 (d, <i>J</i> = 9.0 Hz, 1H)                                                               |
| C10        | 2.88 (d, <i>J</i> = 9.2 Hz, 1H)                                                                                               | 2.90 (d, <i>J</i> = 9.2 Hz, 1H)                                                               |
| C11        | –                                                                                                                             | –                                                                                             |
| C12        | 1.55 (s, 3H)                                                                                                                  | 1.58 (s, 3H)                                                                                  |
| C13        | 1.32 (s, 3H)                                                                                                                  | 1.33 (s, 3H)                                                                                  |
| C2'        | 3.73 (m, 1H)<br>2.78 (m, 2H)                                                                                                  | 3.72 (dd, <i>J</i> = 11.2, 7.7 Hz, 1H)<br>2.79 (td, <i>J</i> = 11.3, 6.6 Hz, 1H)              |
| C3'        | 2.78 (m, 2H)<br>1.78 (m, 1H)                                                                                                  | 2.70 (td, <i>J</i> = 12.3, 8.1 Hz, 1H)<br>1.73–1.64 (m, 1H)                                   |
| C3a'       | –                                                                                                                             | –                                                                                             |
| C4a'       | –                                                                                                                             | –                                                                                             |
| C4'        | 6.57 (br-m, 2H)                                                                                                               | 6.61–6.55 (m, 2H)                                                                             |
| C5'        | 6.57 (br-m, 2H)                                                                                                               | 6.61–6.55 (m, 2H)                                                                             |
| C6'        | 6.90 (m, 1H)                                                                                                                  | 6.92 (ddd, <i>J</i> = 7.8, 6.2, 2.6 Hz, 1H)                                                   |
| C7'        | 6.79 (br-d, <i>J</i> = 7.7 Hz, 1H)                                                                                            | 6.70 (d, <i>J</i> = 7.9 Hz, 1H)                                                               |
| C7a'       | –                                                                                                                             | –                                                                                             |
| C8a'       | 5.12 (s, 1H)                                                                                                                  | 5.14 (d, <i>J</i> = 1.4 Hz, 1H)                                                               |
| C1''       | –                                                                                                                             | –                                                                                             |
| C2''       | 6.53 (d, <i>J</i> = 15.1 Hz, 1H)                                                                                              | 6.53 (d, <i>J</i> = 15.1 Hz, 1H)                                                              |
| C3''       | 7.07 (dd, <i>J</i> = 15.1, 10.1 Hz, 1H)                                                                                       | 7.07 (dd, <i>J</i> = 15.2, 9.7 Hz, 1H),                                                       |
| C4''       | 6.16 (m, 2H)                                                                                                                  | 6.21–6.12 (m, 2H)                                                                             |
| C5''       | 6.16 (m, 2H)                                                                                                                  | 6.21–6.12 (m, 2H)                                                                             |
| C6''       | 1.81 (d, <i>J</i> = 5.4 Hz, 3H)                                                                                               | 1.82 (d, <i>J</i> = 5.3 Hz, 3H)                                                               |
| N8H / N8'H | –                                                                                                                             | 6.03 (d, <i>J</i> = 1.5 Hz, 1H)                                                               |
| N8H / N8'H | –                                                                                                                             | 5.85 (d, <i>J</i> = 1.4 Hz, 1H)                                                               |

53. Jadulco, R.; Edrada, R. A.; Ebel, R.; Berg, A.; Schaumann, K.; Wray, V.; Steube, K.; Proksch, P. *J. Nat. Prod.* **2004**, *67*, 78.

54. No <sup>13</sup>C-NMR spectroscopic data were tabulated for the natural sample of (–)-5 in the isolation report. Based on analysis of the <sup>1</sup>H-NMR, gCOSY, and HRMS data, the authors state: “It was therefore clear that the new derivative [communesin C] is the *N*-demethyl derivative of [communesin B].”

55. These resonances were reported as concealed by the residual water signal.



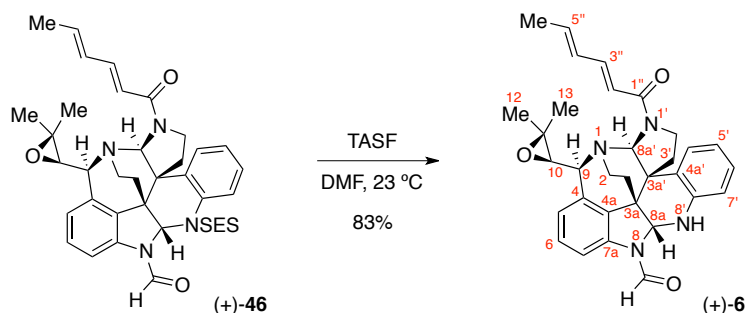

### **(+)-Communesin D (6):**

A solution of tris(dimethylamino)sulfonium difluorotrimethylsilicate (TASF, 11.9 mg, 43.1  $\mu\text{mol}$ , 4.00 equiv) in *N,N*-dimethylformamide (120  $\mu\text{L}$ ) was added to a solution of (+)-*N*8'-(trimethylsilyl)ethanesulfonyl communesin D (**46**, 7.40 mg, 10.8  $\mu\text{mol}$ , 1 equiv) in *N,N*-dimethylformamide (260  $\mu\text{L}$ ) at 23  $^\circ\text{C}$ . After 2 h, a saturated aqueous sodium chloride solution (5 mL) and deionized water (3 mL) were added and the mixture was extracted with ethyl acetate ( $3 \times 5$  mL). The combined organic extracts were washed with a saturated aqueous sodium chloride solution ( $2 \times 10$  mL), were dried over anhydrous sodium sulfate, were filtered, and were concentrated under reduced pressure. The resulting residue was purified by flash column chromatography on silica gel (eluent: 40% $\rightarrow$ 50% acetone in hexanes) to afford (+)-communesin D (**6**, 4.66 mg, 82.8%) as a white solid. Structural assignments were made using additional information from gCOSY, gHSQC, gHMBC, and 1D selective NOESY experiments.

$^1\text{H}$  NMR (500 MHz,  $\text{CDCl}_3$ , 20  $^\circ\text{C}$ , 40 : 7.3\* : 1\*\* mixture of atropisomers, \* and \*\* denote minor atropisomers):  $\delta$  8.92 (d,  $J = 0.9$  Hz, 1H, N8CHO), 8.89 (s, 1H, N8CHO\*), 8.70 (s, 1H, N8CHO\*\*), 7.33 (dd,  $J = 15.1, 10.1$  Hz, 1H, C3''H), 7.04 (app-t,  $J = 7.8$  Hz, 1H, C6H), 7.03–6.99 (m, 2H, C6'H, C6'H\*), 6.81 (d,  $J = 7.9$  Hz, 1H, C7H), 6.77 (d,  $J = 7.9$  Hz, 1H, C7H\*), 6.73–6.67 (m, 3H, C5'H, C7'H, C7'H\*), 6.66 (dd,  $J = 7.7, 1.5$  Hz, 1H, C4'H), 6.61 (d,  $J = 7.8$  Hz, 1H, C5H), 6.49 (d,  $J = 15.1$  Hz, 1H, C2''H), 6.24–6.04 (m, 4H, C2''H\*, C4''H, C4''H\*, C5''H), 5.57–5.54 (m, 1H, C8aH), 5.53 (s, C8aH\*), 5.50 (s, 1H, C8a'H\*), 5.43 (s, 1H, C8a'H\*\*), 5.40–5.38 (m, 1H, N8'H\*), 5.37 (d,  $J = 2.0$  Hz, 1H, N8'H), 5.13 (s, 1H, C8a'H\*\*), 5.10 (s, 1H, C8a'H), 4.68–4.57 (m, 1H, C9H\*), 4.26 (d,  $J = 8.8$  Hz, 1H, C9H), 3.89 (app-dd,  $J = 12.1, 8.3$  Hz, 2H, C2'H<sub>a</sub>, C2'H<sub>a</sub>\*), 3.59–3.39 (m, 2H, C2H<sub>2</sub>), 3.19 (app-q,  $J = 9.2, 1$  Hz, C2'H<sub>b</sub>\*), 3.06 (app-td,  $J = 11.9, 6.9$  Hz, 1H, C2'H<sub>b</sub>), 2.96 (app-q,  $J = 11.1$  Hz, 1H, C3'H<sub>a</sub>\*), 2.88 (d,  $J = 8.9$  Hz, 1H, C10H), 2.80–2.74 (m, 1H, C10H\*), 2.73 (app-td,  $J = 12.5, 8.5$  Hz, 1H, C3'H<sub>a</sub>), 2.49 (d,  $J = 13.4, 8.0, 2.7$  Hz, 1H, C3H<sub>a</sub>), 2.29 (app-dt,  $J = 13.2, 9.3$  Hz, 1H, C3H<sub>b</sub>), 2.14 (app-dd,  $J = 13.4, 7.3$  Hz, 1H, C3'H<sub>b</sub>\*), 2.08 (app-dd,  $J = 13.1, 6.9$  Hz, 1H, C3'H<sub>b</sub>), 1.85 (d,  $J = 6.1$  Hz, 3H, C6''H), 1.84 (d,  $J = 6.2$  Hz, 3H, C6''H\*), 1.66 (s, 3H, C13H<sub>3</sub>), 1.60 (s, 3H, C13H<sub>3</sub>\*), 1.44 (s, 3H, C12H<sub>3</sub>), 1.37 (s, 3H, C12H<sub>3</sub>\*).

$^{13}\text{C}$  NMR (150.9 MHz,  $\text{CDCl}_3$ , 20 °C, 40 : 7.3\* : 1 mixture of atropisomers, \* denotes minor observed atropisomer):  $\delta$  168.4 (C1''), 166.9 (C1''\*), 158.2 (N8CHO), 143.3 (C3''\*), 142.3 (C3''), 141.6 (C7a'\*), 141.5 (C7a'), 140.5 (C7a), 140.3 (C7a\*), 139.2 (C4), 138.5 (C5''\*), 137.7 (C5''), 135.3 (C4a), 135.0 (C4a\*), 131.6 (C4a'\*), 131.0 (C4a'), 130.7 (C4''), 130.3 (C4''\*), 129.1 (C6), 129.0 (C6\*), 128.0 (C6'), 127.8 (C6''\*), 123.6 (C4'\*), 123.4 (C4'), 122.5 (C5\*), 121.9 (C5), 121.4 (C5'\*), 121.1 (C5'), 121.0 (C2''), 119.6 (C2''\*), 117.4 (C7'\*), 117.2 (C7'), 106.5 (C7), 106.1 (C7\*), 78.7 (C8a'), 77.9 (C8a'\*), 77.8 (C8a\*), 77.4 (C8a), 65.4 (C9), 65.0 (C9\*), 64.0 (C10\*), 63.8 (C10), 59.9 (C11), 52.1 (C3a'), 50.9 (C3a), 50.8 (C3a'\*), 49.5 (C3a'\*), 45.1 (C2'\*), 44.2 (C2'), 37.7 (C3), 36.0 (C2), 32.4 (C3'\*), 30.4 (C3'), 25.0 (C12), 24.9 (C12\*), 20.7 (C13), 20.5 (C13\*), 18.9 (C6''), 18.8 (C6''\*).

FTIR (thin film)  $\text{cm}^{-1}$ : 3378 (br-w), 2961 (w), 2934 (w), 2881 (w), 1651 (s), 1626 (m), 1605 (m), 1590 (m), 1488 (m), 1472 (m), 1403 (m), 1306 (m), 1170 (m), 996 (m), 752 (m).

HRMS (ESI) ( $m/z$ ): calc'd for  $\text{C}_{32}\text{H}_{35}\text{N}_4\text{O}_3$   $[\text{M}+\text{H}]^+$ : 523.2704, found: 523.2702.

$[\alpha]_{\text{D}}^{23}$ : +151 ( $c = 0.23$ ,  $\text{CHCl}_3$ ).<sup>56</sup>

TLC (40% acetone in hexanes),  $R_f$ : 0.24 (UV, CAM).

---

56. Literature value:  $[\alpha]_{\text{D}}^{20} = +150$  ( $c = 0.14$ ,  $\text{CHCl}_3$ ), see Hayashi, H.; Matsumoto, H.; Akiyama, K. *Biosci. Biotechnol. Biochem.* **2004**, *68*, 753.

**Table S8. Comparison of our <sup>1</sup>H NMR data for (+)-communesin D (6) with literature data (CDCl<sub>3</sub>, major atropisomer):**

| Assignment | Hayashi's Isolation Report <sup>57,58</sup><br>(+)-Communesin D (6)<br><sup>1</sup> H NMR, CDCl <sub>3</sub> | This Work<br>(+)-Communesin D (6)<br><sup>1</sup> H NMR, 500 MHz, CDCl <sub>3</sub>        |
|------------|--------------------------------------------------------------------------------------------------------------|--------------------------------------------------------------------------------------------|
| C2         | 3.47 (m, 1H)<br>3.43 (m, 1H)                                                                                 | 3.59–3.39 (m, 2H)                                                                          |
| C3         | 2.50 (ddd, <i>J</i> = 13.0, 8.0, 2.5 Hz, 1H)<br>2.30 (dt, <i>J</i> = 13.0, 9.0 Hz, 1H)                       | 2.49 (ddd, <i>J</i> = 13.4, 8.0, 2.7 Hz, 1H)<br>2.29 (app-dt, <i>J</i> = 13.2, 9.3 Hz, 1H) |
| C3a        | –                                                                                                            | –                                                                                          |
| C4a        | –                                                                                                            | –                                                                                          |
| C4         | –                                                                                                            | –                                                                                          |
| C5         | 6.62 (d, <i>J</i> = 8.0 Hz, 1H)                                                                              | 6.61 (d, <i>J</i> = 7.8 Hz, 1H)                                                            |
| C6         | 7.04 (t, <i>J</i> = 8.0 Hz, 1H)                                                                              | 7.04 (app-t, <i>J</i> = 7.8 Hz, 1H)                                                        |
| C7         | 6.81 (d, <i>J</i> = 8.0 Hz, 1H)                                                                              | 6.81 (d, <i>J</i> = 7.9 Hz, 1H)                                                            |
| C7a        | –                                                                                                            | –                                                                                          |
| N8CHO      | 8.91 (d, <i>J</i> = 0.5 Hz, 1H)                                                                              | 8.92 (d, <i>J</i> = 0.9 Hz, 1H)                                                            |
| C8a        | 5.55 (br-d, <i>J</i> = 1.0 Hz, 1H)                                                                           | 5.57–5.54 (m, 1H)                                                                          |
| C9         | 4.26 (d, <i>J</i> = 9.0 Hz, 1H)                                                                              | 4.26 (d, <i>J</i> = 8.8 Hz, 1H)                                                            |
| C10        | 2.88 (d, <i>J</i> = 9.0 Hz, 1H)                                                                              | 2.88 (d, <i>J</i> = 8.9 Hz, 1H)                                                            |
| C11        | –                                                                                                            | –                                                                                          |
| C12        | 1.43 (s, 3H)                                                                                                 | 1.44 (s, 3H)                                                                               |
| C13        | 1.67 (s, 3H)                                                                                                 | 1.66 (s, 3H)                                                                               |
| C2'        | 3.89 (dd, <i>J</i> = 12.0, 8.5 Hz, 1H)<br>3.06 (dt, <i>J</i> = 12.0, 7.0 Hz, 1H)                             | 3.89 (app-dd, <i>J</i> = 12.1, 8.3 Hz, 1H)<br>3.06 (app-td, <i>J</i> = 11.9, 6.9 Hz, 1H)   |
| C3'        | 2.73 (ddd, <i>J</i> = 13.0, 8.0, 2.5 Hz, 1H)<br>2.09 (dd, <i>J</i> = 12.5, 7.0 Hz, 1H)                       | 2.73 (app-td, <i>J</i> = 12.5, 8.5 Hz, 1H)<br>2.08 (app-dd, <i>J</i> = 13.1, 6.9 Hz, 1H)   |
| C3a'       | –                                                                                                            | –                                                                                          |
| C4a'       | –                                                                                                            | –                                                                                          |
| C4'        | 6.69 (dd, <i>J</i> = 6.5, 2.0 Hz, 1H)                                                                        | 6.66 (dd, <i>J</i> = 7.7, 1.5 Hz, 1H)                                                      |
| C5'        | 6.70 (td, <i>J</i> = 6.5, 2.0 Hz, 1H)                                                                        | 6.73–6.67 (m, 2H)                                                                          |
| C6'        | 7.01 (td, <i>J</i> = 6.5, 2.0 Hz, 1H)                                                                        | 7.03–6.99 (m, 1H)                                                                          |
| C7'        | 6.65 (dd, <i>J</i> = 6.5, 2.0 Hz, 1H)                                                                        | 6.73–6.67 (m, 2H)                                                                          |
| C7a'       | –                                                                                                            | –                                                                                          |
| C8a'       | 5.10 (s, 1H)                                                                                                 | 5.10 (s, 1H)                                                                               |
| C1''       | –                                                                                                            | –                                                                                          |
| C2''       | 6.49 (d, <i>J</i> = 15.0 Hz, 1H)                                                                             | 6.49 (d, <i>J</i> = 15.1 Hz, 1H)                                                           |
| C3''       | 7.34 (dd, <i>J</i> = 15.0, 10.5 Hz)                                                                          | 7.33 (dd, <i>J</i> = 15.1, 10.1 Hz, 1H)                                                    |
| C4''       | 6.19 (dd, <i>J</i> = 16.0, 10.5 Hz, 1H)                                                                      | 6.24–6.04 (m, 2H)                                                                          |
| C5''       | 6.14 (dq, <i>J</i> = 16.0, 6.0 Hz, 1H)                                                                       | 6.24–6.04 (m, 2H)                                                                          |
| C6''       | 1.86 (d, <i>J</i> = 6.0 Hz, 3H)                                                                              | 1.85 (d, <i>J</i> = 6.1 Hz, 3H)                                                            |
| N8'H       | 5.37 (d, <i>J</i> = 1.5 Hz, 1H)                                                                              | 5.40–5.38 (m, 1H)                                                                          |

57. Hayashi, H.; Matsumoto, H.; Akiyama, K. *Biosci. Biotechnol. Biochem.* **2004**, *68*, 753.

58. Resonance frequencies and reference points for the residual protium and carbon resonances of the NMR solvent were not listed.

**Table S9. Comparison of our <sup>13</sup>C NMR data for (+)-communesin D (6) with literature data (CDCl<sub>3</sub>, major atropisomer):**

| <b>Assignment</b> | <b>Hayashi's Isolation Report<sup>57,58</sup></b><br>(+)-Communesin D (6)<br><sup>13</sup> C NMR, CDCl <sub>3</sub> | <b>This Work</b><br>(+)-Communesin D (6)<br><sup>13</sup> C NMR, 150.9 MHz, CDCl <sub>3</sub> | <b>Chemical Shift Difference</b><br>$\Delta\delta = \delta$ (this work) –<br>$\delta$ (Hayashi's report) |
|-------------------|---------------------------------------------------------------------------------------------------------------------|-----------------------------------------------------------------------------------------------|----------------------------------------------------------------------------------------------------------|
| C2                | 35.8                                                                                                                | 36.0                                                                                          | 0.2                                                                                                      |
| C3                | 37.5                                                                                                                | 37.7                                                                                          | 0.2                                                                                                      |
| C3a               | 50.7                                                                                                                | 50.9                                                                                          | 0.2                                                                                                      |
| C4a               | 135.1                                                                                                               | 135.3                                                                                         | 0.2                                                                                                      |
| C4                | 139.0                                                                                                               | 139.2                                                                                         | 0.2                                                                                                      |
| C5                | 121.8                                                                                                               | 121.9                                                                                         | 0.1                                                                                                      |
| C6                | 128.9                                                                                                               | 129.0                                                                                         | 0.2                                                                                                      |
| C7                | 106.3                                                                                                               | 106.5                                                                                         | 0.2                                                                                                      |
| C7a               | 140.3                                                                                                               | 140.5                                                                                         | 0.2                                                                                                      |
| N8CHO             | 158.0                                                                                                               | 158.2                                                                                         | 0.2                                                                                                      |
| C8a               | 77.2                                                                                                                | 77.4                                                                                          | 0.2                                                                                                      |
| C9                | 65.2                                                                                                                | 65.4                                                                                          | 0.2                                                                                                      |
| C10               | 63.6                                                                                                                | 63.8                                                                                          | 0.2                                                                                                      |
| C11               | 59.8                                                                                                                | 59.9                                                                                          | 0.1                                                                                                      |
| C12               | 24.8                                                                                                                | 25.0                                                                                          | 0.2                                                                                                      |
| C13               | 20.5                                                                                                                | 20.7                                                                                          | 0.2                                                                                                      |
| C2'               | 44.0                                                                                                                | 44.2                                                                                          | 0.2                                                                                                      |
| C3'               | 30.2                                                                                                                | 30.4                                                                                          | 0.2                                                                                                      |
| C3a'              | 51.9                                                                                                                | 52.1                                                                                          | 0.2                                                                                                      |
| C4a'              | 130.8                                                                                                               | 131.0                                                                                         | 0.2                                                                                                      |
| C4'               | 123.2                                                                                                               | 123.4                                                                                         | 0.2                                                                                                      |
| C5'               | 120.9                                                                                                               | 121.1                                                                                         | 0.2                                                                                                      |
| C6'               | 127.8                                                                                                               | 128.0                                                                                         | 0.2                                                                                                      |
| C7'               | 117.0                                                                                                               | 117.2                                                                                         | 0.2                                                                                                      |
| C7a'              | 141.3                                                                                                               | 141.5                                                                                         | 0.2                                                                                                      |
| C8a'              | 78.4                                                                                                                | 78.7                                                                                          | 0.3                                                                                                      |
| C1''              | 168.2                                                                                                               | 168.4                                                                                         | 0.2                                                                                                      |
| C2''              | 120.8                                                                                                               | 121.1                                                                                         | 0.3                                                                                                      |
| C3''              | 142.1                                                                                                               | 142.3                                                                                         | 0.2                                                                                                      |
| C4''              | 130.5                                                                                                               | 130.7                                                                                         | 0.2                                                                                                      |
| C5''              | 137.5                                                                                                               | 137.7                                                                                         | 0.2                                                                                                      |
| C6''              | 18.7                                                                                                                | 18.9                                                                                          | 0.2                                                                                                      |

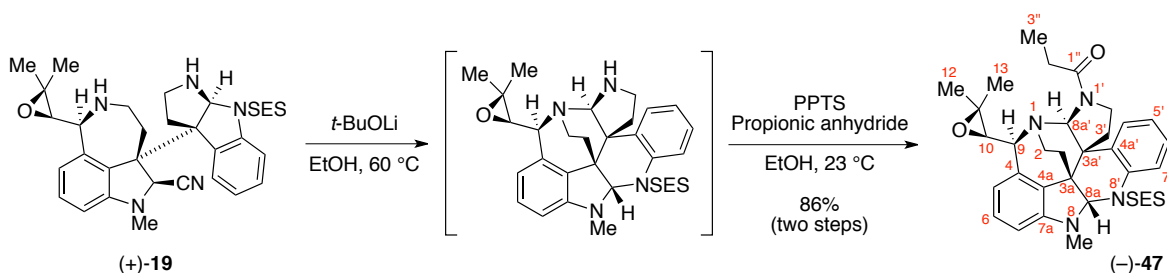

**(-)-N8'-(Trimethylsilyl)ethanesulfonyl communesin G (47):**

A sample of lithium *tert*-butoxide (14.4 mg, 180  $\mu\text{mol}$ , 10.0 equiv) was added to a solution of heterodimer (+)-19 (10.9 mg, 18.0  $\mu\text{mol}$ , 1 equiv) in anhydrous ethanol (200 proof, 475  $\mu\text{L}$ ) at 23  $^\circ\text{C}$ . The flask was sealed with a Teflon-lined glass stopper under an argon atmosphere and was immersed in a preheated oil bath at 60  $^\circ\text{C}$ . After 21 h, the reaction mixture was cooled to 23  $^\circ\text{C}$  and samples of pyridinium *p*-toluenesulfonate (PPTS, 36.3 mg, 144  $\mu\text{mol}$ , 8.00 equiv) and propionic anhydride (9.5  $\mu\text{L}$ , 74  $\mu\text{mol}$ , 4.1 equiv) were added sequentially. The resulting viscous suspension was diluted with anhydrous ethanol (200 proof, 500  $\mu\text{L}$ ). After 30 min, a saturated aqueous sodium bicarbonate solution (8 mL) and deionized water (8 mL) were added and the resulting mixture was extracted with ethyl acetate (3  $\times$  8 mL). The combined organic extracts were washed with a saturated aqueous sodium chloride solution (12 mL), were dried over anhydrous sodium sulfate, were filtered, and were concentrated under reduced pressure. The residue was purified by flash column chromatography on silica gel (eluent: 50% ethyl acetate in hexanes) to afford (-)-N8'-(trimethylsilyl)ethanesulfonyl communesin G (47, 9.80 mg, 85.5%) as a white solid. Structural assignments were made using additional information from gCOSY, gHSQC, gHMBC, and 1D selective NOESY experiments.

$^1\text{H}$  NMR (500 MHz,  $\text{CDCl}_3$ , 20  $^\circ\text{C}$ , 4.6:1 mixture of atropisomers, \*denotes minor atropisomer):

$\delta$  7.56 (dd,  $J = 7.9, 1.2$  Hz, 1H, C7'H), 7.41 (d,  $J = 8.0$ , 1H, C7'H\*), 7.19 (app-td,  $J = 7.9, 1.5$  Hz, 1H, C6'H), 7.18 (app-t,  $J = 7.8$  Hz, 1H, C6'H\*), 7.05 (app-td,  $J = 7.6, 1.3$  Hz, 1H, C5'H), 7.04 (app-t,  $J = 7.6$  Hz, 1H, C5'H\*), 6.91 (t,  $J = 7.7$  Hz, 2H, C6'H, C6'H\*), 6.81 (dd,  $J = 7.8, 1.5$  Hz, 1H, C4'H), 6.73 (d,  $J = 7.6$  Hz, 1H, C4'H\*), 6.14 (d,  $J = 8.1$  Hz, 1H, C5'H\*), 6.10 (d,  $J = 7.6$  Hz, 1H, C5'H), 5.97 (d,  $J = 7.8$  Hz, 1H, C7'H), 5.94 (d,  $J = 7.8$  Hz, 1H, C7'H\*), 5.71 (s, 1H, C8a'H), 5.63 (s, 1H, C8a'H\*), 5.43 (s, 1H, C8a'H\*), 5.07 (s, 1H, C8a'H), 4.51 (d,  $J = 8.9$  Hz, 1H, C9'H\*), 4.10 (d,  $J = 9.0$  Hz, 1H, C9'H), 3.94 (app-dd,  $J = 11.2, 8.8$  Hz, 1H, C2'H<sub>a</sub>), 3.72 (app-t,  $J = 9.3$  Hz, 1H, C2'H<sub>a</sub>\*), 3.56 (app-dd,  $J = 15.6, 9.9$  Hz, 1H, C2'H<sub>a</sub>\*), 3.48 (app-dd,  $J = 16.1, 10.0$  Hz, 2H, C2'H<sub>a</sub>, C2'H<sub>b</sub>\*), 3.41–3.29 (m, 2H, C2'H<sub>b</sub>, N8'SO<sub>2</sub>CH<sub>a</sub>\*), 3.28–3.20 (m, 1H, N8'SO<sub>2</sub>CH<sub>b</sub>\*), 3.24 (app-td,  $J = 13.4, 5.0$  Hz, 1H, N8'SO<sub>2</sub>CH<sub>a</sub>), 3.22–3.15 (m, 1H, C2'H<sub>b</sub>\*), 3.16 (app-td,  $J = 13.3, 4.7$  Hz, 1H, N8'SO<sub>2</sub>CH<sub>b</sub>), 3.10 (app-td,  $J = 11.4, 7.6$  Hz, 1H, C2'H<sub>b</sub>), 3.05–2.96 (m, 1H, C3'H<sub>a</sub>\*), 2.92 (s, 3H, N8CH<sub>3</sub>), 2.91–2.75 (m, 7H, N8CH<sub>3</sub>\*, C10'H, C10'H\*, C3'H<sub>a</sub>, C2'H<sub>a</sub>), 2.55–2.44 (m, 2H, C3'H<sub>a</sub>, C3'H<sub>a</sub>\*), 2.39 (app-dq,  $J = 14.6, 7.4$  Hz, 1H, C2'H<sub>b</sub>), 2.34–2.24 (m, 4H, C3'H<sub>b</sub>, C3'H<sub>b</sub>\*), 2.11 (app-dd,  $J = 13.4, 7.4$  Hz, 1H, C3'H<sub>b</sub>\*), 1.91 (app-dd,  $J = 13.2, 6.6$  Hz, 1H, C3'H<sub>b</sub>), 1.58 (s, 3H, C13H<sub>3</sub>\*), 1.53 (s, 3H,

C13H<sub>3</sub>), 1.38 (s, 3H, C12H<sub>3</sub>), 1.35 (s, 3H, C12H<sub>3</sub>\*), 1.30–1.19 (m, 5H, C3''H<sub>3</sub>, N8'SO<sub>2</sub>CH<sub>2</sub>CH<sub>2</sub>), 1.19–1.13 (m, 5H, C3''H<sub>3</sub>\*, N8'SO<sub>2</sub>CH<sub>2</sub>CH<sub>2</sub>\*), 0.10 (s, 9H, Si(CH<sub>3</sub>)<sub>3</sub>\*), 0.06 (s, 9H, Si(CH<sub>3</sub>)<sub>3</sub>).

<sup>13</sup>C NMR (150.9 MHz, CDCl<sub>3</sub>, 20 °C, 4.6:1 mixture of atropisomers, \*denotes minor atropisomer):

δ 175.0 (C1''), 173.6 (C1''\*), 150.0 (C7a), 149.5 (C7a\*), 139.3 (C4a\*), 138.4 (C4a'), 137.4 (C4), 136.2 (C7a'), 136.1 (C7a'), 131.3 (C4a), 129.4 (C6), 129.2 (C6\*), 127.9 (C6'), 127.7 (C6\*), 126.7 (C5'\*), 126.4 (C5'), 125.4 (C7'\*), 124.8 (C7'), 124.3 (C4'\*), 124.0 (C4'), 114.6 (C5\*), 113.9 (C5), 102.6 (C7), 102.3 (C7\*), 85.3 (C8a\*), 84.8 (C8a), 79.4 (C8a'), 78.4 (C8a'\*), 65.4 (C9), 65.2 (C9\*), 64.0 (C10\*), 63.9 (C10), 59.8 (2C, C11, C11\*), 54.2 (2C, C3a, C3a\*), 52.6 (C3a'), 52.5 (N8'SO<sub>2</sub>CH<sub>2</sub>\*), 51.8 (N8'SO<sub>2</sub>CH<sub>2</sub>), 50.2 (C3a'), 45.1 (C2'\*), 44.3 (C2'), 38.0 (2C, C3\*, C2\*), 37.8 (C3), 36.6 (C2), 33.3 (C3'\*), 31.6 (C3'), 31.0 (N8CH<sub>3</sub>\*), 30.9 (N8CH<sub>3</sub>), 28.2 (C2''\*), 27.8 (C2''), 24.9 (2C, C12, C12\*), 20.6 (2C, C13\*, C13), 10.8 (N8'SO<sub>2</sub>CH<sub>2</sub>CH<sub>2</sub>\*), 10.7 (N8'SO<sub>2</sub>CH<sub>2</sub>CH<sub>2</sub>), 9.3 (C3''), 8.7 (C3''\*), -1.7 (Si(CH<sub>3</sub>)<sub>3</sub>\*), -1.8 (Si(CH<sub>3</sub>)<sub>3</sub>).

FTIR (thin film) cm<sup>-1</sup>:

3055 (w), 2955 (m), 2879 (w), 1650 (m), 1599 (s), 1487 (m), 1408 (m), 1341 (m), 1250 (m), 1157 (m), 1056 (m).

HRMS (ESI) (*m/z*):

calc'd for C<sub>34</sub>H<sub>47</sub>N<sub>4</sub>O<sub>4</sub>SSi [M+H]<sup>+</sup>: 635.3082,  
found: 635.3085.

[α]<sub>D</sub><sup>22</sup>:

-129 (*c* = 0.49, CH<sub>2</sub>Cl<sub>2</sub>).

TLC (50% ethyl acetate in hexanes), R<sub>f</sub>:

0.19 (UV, CAM).

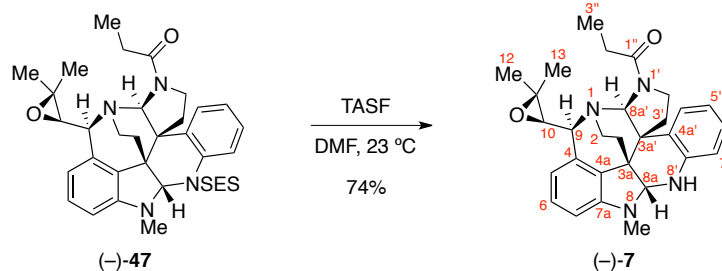

### **(-)-Communesin G (7):**

A solution of tris(dimethylamino)sulfonium difluorotrimethylsilicate (TASF, 12.7 mg, 46.0  $\mu\text{mol}$ , 4.00 equiv) in *N,N*-dimethylformamide (180  $\mu\text{L}$ ) was added to a suspension of (-)-*N*8'-(trimethylsilyl)ethanesulfonyl communesin G (**47**, 7.30 mg, 11.5  $\mu\text{mol}$ , 1 equiv) in *N,N*-dimethylformamide (200  $\mu\text{L}$ ) at 23  $^\circ\text{C}$ . After 4 h, a saturated aqueous sodium chloride solution (5 mL) and deionized water (3 mL) were added and the mixture was extracted with ethyl acetate (3  $\times$  8 mL). The combined organic extracts were washed with a saturated aqueous sodium chloride solution (2  $\times$  15 mL), were dried over anhydrous sodium sulfate, were filtered, and were concentrated under reduced pressure. The resulting residue was purified by flash column chromatography on silica gel (eluent: 30% acetone in hexanes) to afford (-)-communesin G (**7**, 3.99 mg, 73.8%) as a white solid. Structural assignments were made using additional information from gCOSY, gHSQC, gHMBC, and 1D selective NOESY experiments.

$^1\text{H}$  NMR (500 MHz,  $\text{CDCl}_3$ , 20  $^\circ\text{C}$ , 8.7:1 mixture of atropisomers, \*denotes minor atropisomer):

$\delta$  7.00 (app-td,  $J = 7.6, 1.6$  Hz, 2H, C6'H, C6'H\*), 6.88 (t,  $J = 7.7$  Hz, 2H, C6'H, C6'H\*), 6.73–6.64 (m, 5H, C4'H, C5'H, C5'H\*, C7'H, C7'H\*), 6.60 (d,  $J = 7.0$  Hz, 1H, C4'H\*), 6.09 (d,  $J = 7.2$  Hz, 1H, C5'H\*), 6.06 (d,  $J = 7.6$  Hz, 1H, C5'H), 5.95 (d,  $J = 7.8$  Hz, 1H, C7'H), 5.91 (d,  $J = 7.8$  Hz, 1H, C7'H\*), 5.30 (app-s, 1H, C8a'H\*), 5.05 (d,  $J = 1.4$  Hz, 1H, C8a'H), 4.69 (s, 1H, C8a'H), 4.67 (s, 1H, C8a'H\*), 4.58 (br-s, 1H, N8'H), 4.50 (d,  $J = 8.5$  Hz, 1H, C9'H\*), 4.10 (d,  $J = 9.2$  Hz, 1H, C9'H), 3.89 (app-dd,  $J = 11.9, 8.4$  Hz, 1H, C2'H<sub>a</sub>), 3.70–3.63 (m, 1H, C2'H<sub>a</sub>\*), 3.54 (app-dd,  $J = 15.4, 9.2$  Hz, 1H, C2'H<sub>a</sub>\*), 3.45 (app-dd,  $J = 15.7, 9.5$  Hz, 1H, C2'H<sub>a</sub>), 3.41–3.30 (m, 2H, C2'H<sub>b</sub>, C2'H<sub>b</sub>\*), 3.12–3.06 (m, 1H, C2'H<sub>b</sub>\*), 3.02 (app-td,  $J = 11.6, 7.3$  Hz, 1H, C2'H<sub>b</sub>), 2.96–2.83 (m, 3H, C10'H, C3'H<sub>a</sub>\*, C2''H<sub>a</sub>), 2.84 (s, 3H, N8CH<sub>3</sub>), 2.82 (s, 3H, N8CH<sub>3</sub>\*), 2.80 (d,  $J = 9.2$  Hz, 1H, C10'H\*), 2.73 (app-td,  $J = 12.3, 11.3, 8.6$  Hz, 1H, C3'H<sub>a</sub>), 2.46–2.32 (m, 3H, C3'H<sub>a</sub>, C3'H<sub>a</sub>\*, C2''H<sub>b</sub>), 2.32–2.22 (m, 3H, C3'H<sub>b</sub>, C3'H<sub>b</sub>\*, C2''H<sub>b</sub>\*), 2.03 (app-dd,  $J = 13.0, 7.2$  Hz, 1H, C3'H<sub>b</sub>\*), 1.96 (app-dd,  $J = 13.3, 6.7$  Hz, 1H, C3'H<sub>b</sub>), 1.59 (s, 3H, C13H<sub>3</sub>\*), 1.54 (s, 3H, C13H<sub>3</sub>), 1.38 (s, 3H, C12H<sub>3</sub>), 1.36 (s, 3H, C12H<sub>3</sub>\*), 1.22 (t,  $J = 7.4$  Hz, 3H, C3''H<sub>3</sub>), 1.16 (t,  $J = 7.3$  Hz, 3H, C3''H<sub>3</sub>\*).

$^{13}\text{C}$  NMR (150.9 MHz,  $\text{CDCl}_3$ , 20  $^\circ\text{C}$ , 8.7:1 mixture of atropisomers, \*denotes minor atropisomer):

$\delta$  175.3 (C1''), 150.7 (C7a), 150.6 (C7a\*), 142.9 (C7a\*), 142.8 (C7a'), 137.1 (C4), 132.7 (C4a'), 132.4 (C4a), 132.2 (C4a\*), 129.0 (C6), 128.8 (C6\*), 127.5 (C6'),

127.3 (C6\*), 123.6 (C4\*), 123.4 (C4'), 121.0 (C5\*), 120.7 (C5'), 117.2 (C7\*), 117.1 (C7'), 114.0 (C5\*), 113.4 (C5), 101.9 (C7), 101.5 (C7\*), 83.1 (C8a\*), 82.7 (C8a), 79.1 (C8a'), 78.1 (C8a''), 65.4 (C9), 65.1 (C9\*), 64.2 (C10\*), 64.1 (C10), 59.8 (C11), 52.1 (C3a'), 51.6 (C3a), 49.8 (C3a''), 45.2 (C2\*), 44.3 (C2'), 38.5 (C3\*), 38.2 (C3), 37.8 (C2\*), 36.5 (C2), 32.6 (C3\*), 30.8 (C3'), 29.9 (N8CH<sub>3</sub>\*), 29.8 (N8CH<sub>3</sub>), 28.3 (C2''), 27.8 (C2'''), 24.9 (2C, C12, C12\*), 20.6 (2C, C13\*, C13), 9.4 (C3''), 8.7 (C3''').

FTIR (thin film) cm<sup>-1</sup>:

3321 (br-m), 3052 (w), 2963 (m), 2921 (m), 2880 (m), 1641 (m), 1596 (m), 1494 (m), 1409 (m), 1280 (m), 1086 (m), 739 (m).

HRMS (ESI) (*m/z*):

calc'd for C<sub>29</sub>H<sub>35</sub>N<sub>4</sub>O<sub>2</sub> [M+H]<sup>+</sup>: 471.2755,  
found: 471.2754.

[α]<sub>D</sub><sup>23</sup>:

-163 (*c* = 0.20, MeOH).<sup>59</sup>

TLC (30% acetone in hexanes), R<sub>f</sub>:

0.16 (UV, CAM).

---

59. Literature value: [α]<sub>D</sub><sup>25</sup> = -157 (*c* = 0.021, MeOH), see Dalsgaard, P. W.; Blunt, J. W.; Munro, M. H. G.; Frisvad, J. C.; Christophersen, C. *J. Nat. Prod.* **2005**, *68*, 258.



**Table S10. Comparison of our <sup>1</sup>H NMR data for (–)-communesin G (7) with literature data (CDCl<sub>3</sub>, major atropisomer):**

| Assignment        | Christoffersen's Isolation Report <sup>60,61</sup><br>(–)-Communesin G (7)<br><sup>1</sup> H NMR, 500 MHz, CDCl <sub>3</sub> | This Work<br>(–)-Communesin G (7)<br><sup>1</sup> H NMR, 500 MHz, CDCl <sub>3</sub>            |
|-------------------|------------------------------------------------------------------------------------------------------------------------------|------------------------------------------------------------------------------------------------|
| C2                | 3.44 (m, 1H)<br>3.35 (m, 1H)                                                                                                 | 3.45 (app-dd, <i>J</i> = 15.7, 9.5 Hz, 1H)<br>3.41–3.30 (m, 1H)                                |
| C3                | 2.35 (m, 1H)<br>2.27 (m, 1H)                                                                                                 | 2.46–2.32 (m, 2H)<br>2.32–2.22 (m, 2H)                                                         |
| C3a               | –                                                                                                                            | –                                                                                              |
| C4a               | –                                                                                                                            | –                                                                                              |
| C4                | –                                                                                                                            | –                                                                                              |
| C5                | 6.06 (d, <i>J</i> = 7.5 Hz, 1H)                                                                                              | 6.06 (d, <i>J</i> = 7.6 Hz, 1H)                                                                |
| C6                | 6.87 (t, <i>J</i> = 7.5 Hz, 1H)                                                                                              | 6.88 (t, <i>J</i> = 7.7 Hz, 1H)                                                                |
| C7                | 5.95 (d, <i>J</i> = 7.5 Hz, 1H)                                                                                              | 5.95 (d, <i>J</i> = 7.8 Hz, 1H)                                                                |
| C7a               | –                                                                                                                            | –                                                                                              |
| N8CH <sub>3</sub> | 2.82 (s, 3H)                                                                                                                 | 2.84 (s, 3H)                                                                                   |
| C8a               | 4.69 (s, 1H)                                                                                                                 | 4.69 (s, 1H)                                                                                   |
| C9                | 4.10 (d, <i>J</i> = 9.5 Hz, 1H)                                                                                              | 4.10 (d, <i>J</i> = 9.2 Hz, 1H)                                                                |
| C10               | 2.85 (m, 1H)                                                                                                                 | 2.96–2.83 (m, 2H)                                                                              |
| C11               | –                                                                                                                            | –                                                                                              |
| C12               | 1.37 (s, 3H)                                                                                                                 | 1.38 (s, 3H)                                                                                   |
| C13               | 1.54 (s, 3H)                                                                                                                 | 1.54 (s, 3H)                                                                                   |
| C2'               | 3.88 (dd, <i>J</i> = 12.0, 8.8 Hz, 1H)<br>3.01 (ddd, <i>J</i> = 12.0, 11.7, 6.5 Hz, 1H)                                      | 3.89 (app-dd, <i>J</i> = 11.9, 8.4 Hz, 1H)<br>3.02 (app-td, <i>J</i> = 11.6, 7.3 Hz, 1H)       |
| C3'               | 2.73 (ddd, <i>J</i> = 13.0, 11.7, 8.8 Hz, 1H)<br>1.95 (dd, <i>J</i> = 13.0, 6.5 Hz, 1H)                                      | 2.73 (app-td, <i>J</i> = 12.3, 11.3, 8.6 Hz, 1H)<br>1.96 (app-dd, <i>J</i> = 13.3, 6.7 Hz, 1H) |
| C3a'              | –                                                                                                                            | –                                                                                              |
| C4a'              | –                                                                                                                            | –                                                                                              |
| C4'               | 6.66 (m, 1H)                                                                                                                 | 6.73–6.64 (m, 3H)                                                                              |
| C5'               | 6.68 (m, 1H)                                                                                                                 | 6.73–6.64 (m, 3H)                                                                              |
| C6'               | 6.99 (td, <i>J</i> = 8.0, 1.5 Hz, 1H)                                                                                        | 7.00 (app-td, <i>J</i> = 7.6, 1.6 Hz, 1H)                                                      |
| C7'               | 6.69 (m, 1H)                                                                                                                 | 6.73–6.64 (m, 3H)                                                                              |
| C7a'              | –                                                                                                                            | –                                                                                              |
| C8a'              | 5.05 (s, 1H)                                                                                                                 | 5.05 (d, <i>J</i> = 1.4 Hz, 1H)                                                                |
| C1''              | –                                                                                                                            | –                                                                                              |
| C2''              | 2.88 (m, 1H)<br>2.42 (m, 1H)                                                                                                 | 2.96–2.83 (m, 2H)<br>2.46–2.32 (m, 2H)                                                         |
| C3''              | 1.22 (t, <i>J</i> = 7.5 Hz, 3H)                                                                                              | 1.22 (t, <i>J</i> = 7.4 Hz, 3H)                                                                |
| N8'H              | –                                                                                                                            | 4.58 (br-s, 1H)                                                                                |

60. Dalsgaard, P. W.; Blunt, J. W.; Munro, M. H. G.; Frisvad, J. C.; Christophersen, C. *J. Nat. Prod.* **2005**, *68*, 258.

61. Proton NMR spectra were referenced from the residual protium in the NMR solvent (CHCl<sub>3</sub>: δ 7.25).

**Table S11. Comparison of our  $^{13}\text{C}$  NMR data for (–)-communesin G (7) with literature data ( $\text{CDCl}_3$ , major atropisomer):**

| Assignment        | Christophersen's<br>Isolation Report <sup>60,62</sup><br>(–)-Communesin G (7)<br>$^{13}\text{C}$ NMR, 75 MHz $\text{CDCl}_3$ | This Work<br>(–)-Communesin G (7)<br>$^{13}\text{C}$ NMR, 150.9 MHz, $\text{CDCl}_3$ | Chemical Shift Difference<br>$\Delta\delta = \delta$ (this work) –<br>$\delta$ (Christophersen report) |
|-------------------|------------------------------------------------------------------------------------------------------------------------------|--------------------------------------------------------------------------------------|--------------------------------------------------------------------------------------------------------|
| C2                | 36.3                                                                                                                         | 36.5                                                                                 | 0.2                                                                                                    |
| C3                | 38.0                                                                                                                         | 38.2                                                                                 | 0.2                                                                                                    |
| C3a               | 51.7                                                                                                                         | 51.6                                                                                 | <b>-0.1</b> <sup>63</sup>                                                                              |
| C4a               | 132.4                                                                                                                        | 132.4                                                                                | 0.0                                                                                                    |
| C4                | 136.7                                                                                                                        | 137.1                                                                                | 0.4                                                                                                    |
| C5                | 113.2                                                                                                                        | 113.4                                                                                | 0.2                                                                                                    |
| C6                | 128.8                                                                                                                        | 129.0                                                                                | 0.2                                                                                                    |
| C7                | 101.7                                                                                                                        | 101.9                                                                                | 0.2                                                                                                    |
| C7a               | 150.5                                                                                                                        | 150.7                                                                                | 0.2                                                                                                    |
| N8CH <sub>3</sub> | 29.6                                                                                                                         | 29.8                                                                                 | 0.2                                                                                                    |
| C8a               | 82.5                                                                                                                         | 82.7                                                                                 | 0.2                                                                                                    |
| C9                | 65.1                                                                                                                         | 65.4                                                                                 | 0.3                                                                                                    |
| C10               | 64.0                                                                                                                         | 64.2                                                                                 | 0.2                                                                                                    |
| C11               | 59.7                                                                                                                         | 59.8                                                                                 | 0.1                                                                                                    |
| C12               | 24.6                                                                                                                         | 24.9                                                                                 | 0.3                                                                                                    |
| C13               | 20.4                                                                                                                         | 20.6                                                                                 | 0.2                                                                                                    |
| C2'               | 44.1                                                                                                                         | 44.3                                                                                 | 0.2                                                                                                    |
| C3'               | 30.5                                                                                                                         | 30.8                                                                                 | 0.3                                                                                                    |
| C3a'              | 51.4                                                                                                                         | 52.1                                                                                 | <b>0.7</b> <sup>63</sup>                                                                               |
| C4a'              | 132.5                                                                                                                        | 132.7                                                                                | 0.2                                                                                                    |
| C4'               | 123.3                                                                                                                        | 123.4                                                                                | 0.1                                                                                                    |
| C5'               | 117.0                                                                                                                        | 120.7                                                                                | <b>3.7</b> <sup>64</sup>                                                                               |
| C6'               | 127.4                                                                                                                        | 127.5                                                                                | 0.1                                                                                                    |
| C7'               | 120.6                                                                                                                        | 117.1                                                                                | <b>-3.5</b> <sup>64</sup>                                                                              |
| C7a'              | 142.6                                                                                                                        | 142.8                                                                                | 0.2                                                                                                    |
| C8a'              | 78.9                                                                                                                         | 79.1                                                                                 | 0.2                                                                                                    |
| C1''              | 175.3                                                                                                                        | 175.3                                                                                | 0.0                                                                                                    |
| C2''              | 27.6                                                                                                                         | 27.8                                                                                 | 0.2                                                                                                    |
| C3''              | 9.2                                                                                                                          | 9.4                                                                                  | 0.2                                                                                                    |

62. Carbon-13 NMR spectra are referenced from the carbon resonances of the deuterated solvent ( $\text{CDCl}_3$ ;  $\delta$  77.01)

63. Our revised assignment of C3a and C3a' resonances is supported by key gHMBC correlations ( $^1\text{H}$ ,  $^{13}\text{C}$ ) in ppm: (6.06,51.6), (3.45,51.6), (6.73,52.1), and (3.89,52.1).

64. Our revised assignment of C5' and C7' resonances is supported by a key 4-bond gHMBC correlation ( $^1\text{H}$ ,  $^{13}\text{C}$ ) in ppm: (4.69,117.1).

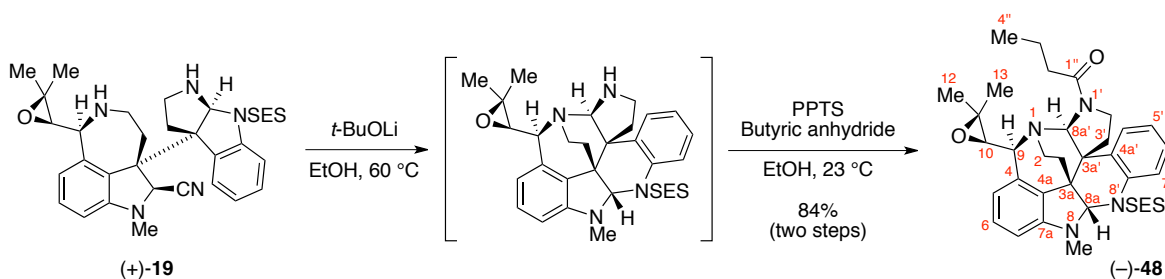

**(-)-N8'-(Trimethylsilyl)ethanesulfonyl communesin H (48):**

A sample of lithium *tert*-butoxide (21.6 mg, 270  $\mu\text{mol}$ , 10.0 equiv) was added to a solution of heterodimer (+)-**19** (16.3 mg, 27.0  $\mu\text{mol}$ , 1 equiv) in anhydrous ethanol (200 proof, 710  $\mu\text{L}$ ) at 23  $^{\circ}\text{C}$ . The flask was sealed with a Teflon-lined glass stopper under an argon atmosphere and was immersed in a preheated oil bath at 60  $^{\circ}\text{C}$ . After 23 h, the reaction mixture was cooled to 23  $^{\circ}\text{C}$  and samples of pyridinium *p*-toluenesulfonate (PPTS, 54.2 mg, 216  $\mu\text{mol}$ , 8.00 equiv) and butyric anhydride (18.0  $\mu\text{L}$ , 108  $\mu\text{mol}$ , 4.00 equiv) were added sequentially. After 40 min, a saturated aqueous sodium bicarbonate solution (10 mL) and deionized water (10 mL) were added and the resulting mixture was extracted with ethyl acetate (3  $\times$  10 mL). The combined organic extracts were washed with a saturated aqueous sodium chloride solution (15 mL), were dried over anhydrous sodium sulfate, were filtered, and were concentrated under reduced pressure. The residue was purified by flash column chromatography on silica gel (eluent: 45 $\rightarrow$ 50% ethyl acetate in hexanes) to afford (-)-N8'-(trimethylsilyl)ethanesulfonyl communesin H (**48**, 14.6 mg, 83.7%) as a white solid. Structural assignments were made using additional information from gCOSY, gHSQC, gHMBC, and 1D selective NOESY experiments.

$^1\text{H}$  NMR (500 MHz,  $\text{CDCl}_3$ , 20  $^{\circ}\text{C}$ , 5.9:1 mixture of atropisomers, \*denotes minor atropisomer):

$\delta$  7.57 (dd,  $J = 8.0, 1.1$  Hz, 1H, C7'H), 7.41 (d,  $J = 8.1$ , 1H, C7'H\*), 7.20–7.16 (m, 1H, C6'H\*), 7.19 (app-td,  $J = 7.8, 1.4$  Hz, 1H, C6'H), 7.06–7.01 (m, 1H, C5'H\*), 7.05 (dd,  $J = 8.2, 6.9$  Hz, 1H, C5'H), 6.91 (t,  $J = 7.7$  Hz, 1H, C6'H), 6.89 (t,  $J = 7.8$  Hz, 1H, C6'H\*), 6.81 (dd,  $J = 7.9, 1.3$  Hz, 1H, C4'H), 6.75 (d,  $J = 7.9$  Hz, 1H, C4'H\*), 6.14 (d,  $J = 8.1$  Hz, 1H, C5'H\*), 6.10 (d,  $J = 7.6$  Hz, 1H, C5'H), 5.98 (d,  $J = 7.8$  Hz, 1H, C7'H), 5.93 (d,  $J = 7.9$  Hz, 1H, C7'H\*), 5.71 (s, 1H, C8aH), 5.63 (s, 1H, C8aH\*), 5.44 (s, 1H, C8a'H\*), 5.06 (s, 1H, C8a'H), 4.51 (d,  $J = 8.4$  Hz, 1H, C9'H\*), 4.11 (d,  $J = 9.0$  Hz, 1H, C9'H), 3.93 (app-dd,  $J = 12.1, 8.4$  Hz, 1H, C2'H<sub>a</sub>), 3.74 (app-t,  $J = 9.6$  Hz, 1H, C2'H<sub>a</sub>\*), 3.56 (app-dd,  $J = 15.7, 10.1$  Hz, 1H, C2'H<sub>a</sub>\*), 3.48 (app-dd,  $J = 16.1, 9.5$  Hz, 1H, C2'H<sub>a</sub>), 3.36–3.20 (m, 2H, N8'SO<sub>2</sub>CH<sub>2</sub>\*), 3.35 (app-dt,  $J = 15.9, 8.8$  Hz, 2H, C2'H<sub>b</sub>, C2'H<sub>b</sub>\*), 3.24 (app-td,  $J = 13.4, 4.8$  Hz, 1H, N8'SO<sub>2</sub>CH<sub>a</sub>), 3.23–3.19 (m, 1H, C2'H<sub>b</sub>\*), 3.16 (app-td,  $J = 13.4, 4.8$  Hz, 1H, N8'SO<sub>2</sub>CH<sub>b</sub>), 3.08 (app-td,  $J = 11.4, 7.2$  Hz, 1H, C2'H<sub>b</sub>), 3.05–2.96 (m, 1H, C3'H<sub>a</sub>\*), 2.92 (s, 3H, N8CH<sub>3</sub>), 2.87 (s, 3H, N8CH<sub>3</sub>\*), 2.86–2.75 (m, 5H, C10H, C10H\*, C3'H<sub>a</sub>, C2'H<sub>a</sub>, C2'H<sub>a</sub>\*), 2.48 (app-dd,  $J = 13.0, 8.2$  Hz, 2H, C3'H<sub>a</sub>, C3'H<sub>a</sub>\*), 2.38–2.21 (m, 4H, C3'H<sub>b</sub>, C3'H<sub>b</sub>\*, C2'H<sub>b</sub>, C2'H<sub>b</sub>\*), 2.10 (app-dd,  $J = 13.3, 7.3$  Hz, 1H, C3'H<sub>b</sub>\*), 1.90 (app-dd,  $J = 13.2, 6.8$  Hz, 1H, C3'H<sub>b</sub>), 1.84–1.68 (m, 4H, C3'H<sub>2</sub>, C3'H<sub>2</sub>\*),

1.58 (s, 3H, C13H<sub>3</sub>\*), 1.55 (s, 3H, C13H<sub>3</sub>), 1.38 (s, 3H, C12H<sub>3</sub>), 1.35 (s, 3H, C12H<sub>3</sub>\*), 1.33–1.13 (m, 4H, N8'SO<sub>2</sub>CH<sub>2</sub>CH<sub>2</sub>, N8'SO<sub>2</sub>CH<sub>2</sub>CH<sub>2</sub>\*), 1.01 (t, *J* = 7.4 Hz, 3H, C4''H<sub>3</sub>), 0.95 (t, *J* = 7.5 Hz, 3H, C4''H<sub>3</sub>\*), 0.10 (s, 9H, Si(CH<sub>3</sub>)<sub>3</sub>\*), 0.06 (s, 9H, Si(CH<sub>3</sub>)<sub>3</sub>).

<sup>13</sup>C NMR (150.9 MHz, CDCl<sub>3</sub>, 20 °C, 5.9:1 mixture of atropisomers, \*denotes minor atropisomer):

δ 174.3 (C1''), 173.0 (C1''\*), 150.0 (C7a), 149.5 (C7a\*), 139.3 (C4a''), 138.4 (C4a'), 137.3 (C4), 136.2 (C7a''), 136.1 (C7a'), 131.3 (2C, C4a, C4a\*), 129.4 (C6), 129.2 (C6\*), 127.9 (C6'), 127.7 (C6'\*), 126.7 (C5'\*), 126.4 (C5'), 125.4 (C7'\*), 124.8 (C7'), 124.3 (C4'\*), 124.0 (C4'), 114.7 (C5\*), 113.9 (C5), 102.6 (C7), 102.3 (C7\*), 85.3 (C8a\*), 84.8 (C8a), 79.4 (C8a'), 78.3 (C8a''), 65.4 (C9), 65.2 (C9\*), 64.0 (C10\*), 63.9 (C10), 59.8 (2C, C11, C11''), 54.2 (2C, C3a, C3a\*), 52.6 (C3a'), 52.5 (N8'SO<sub>2</sub>CH<sub>2</sub>\*), 51.8 (N8'SO<sub>2</sub>CH<sub>2</sub>), 50.1 (C3a''), 45.2 (C2'\*), 44.1 (C2'), 38.1 (C3\*), 38.0 (C2\*), 37.8 (C3), 37.1 (C2''\*), 36.8 (C2''), 36.6 (C2), 33.3 (C3'\*), 31.5 (C3'), 31.0 (N8CH<sub>3</sub>\*), 30.9 (N8CH<sub>3</sub>), 24.9 (2C, C12, C12\*), 20.6 (C13\*), 20.5 (C13), 18.4 (C3''), 18.1 (C3''\*), 14.3 (C4''), 14.2 (C4''\*), 10.8 (N8'SO<sub>2</sub>CH<sub>2</sub>CH<sub>2</sub>\*), 10.7 (N8'SO<sub>2</sub>CH<sub>2</sub>CH<sub>2</sub>), -1.7 (Si(CH<sub>3</sub>)<sub>3</sub>\*), -1.8 (Si(CH<sub>3</sub>)<sub>3</sub>).

FTIR (thin film) cm<sup>-1</sup>:

3055 (w), 2958 (m), 2875 (w), 1649 (m), 1599 (m), 1487 (m), 1408 (m), 1341 (m), 1251 (m), 1156 (m), 1053 (m).

HRMS (ESI) (*m/z*):

calc'd for C<sub>35</sub>H<sub>49</sub>N<sub>4</sub>O<sub>4</sub>SSi [M+H]<sup>+</sup>: 649.3238,  
found: 649.3244.

[α]<sub>D</sub><sup>22</sup>:

-128 (*c* = 0.73, CH<sub>2</sub>Cl<sub>2</sub>).

TLC (50% ethyl acetate in hexanes), R<sub>f</sub>:

0.35 (UV, CAM).



143.0 (C7a\*), 142.9 (C7a'), 137.2 (C4), 133.3 (C4a\*), 132.8 (C4a'), 132.5 (C4a), 132.3 (C4a\*), 129.0 (C6), 128.8 (C6\*), 127.5 (C6'), 127.3 (C6'\*), 123.7 (C4'\*), 123.4 (C4'), 121.0 (C5'\*), 120.7 (C5'), 117.2 (C7'\*), 117.1 (C7'), 114.1 (C5\*), 113.4 (C5), 102.0 (C7), 101.6 (C7\*), 83.2 (C8a\*), 82.8 (C8a), 79.2 (C8a'), 78.1 (C8a'\*), 65.5 (C9), 65.2 (C9\*), 64.3 (C10\*), 64.2 (C10), 59.8 (C11), 52.2 (C3a'), 51.7 (C3a), 51.6 (C3a\*), 49.8 (C3a'\*), 45.4 (C2'\*), 44.2 (C2'), 38.7 (C3\*), 38.3 (C3), 37.9 (C2\*), 37.2 (C2''\*), 36.8 (C2''), 36.5 (C2), 32.7 (C3'\*), 30.8 (C3'), 29.9 (N8CH<sub>3</sub>\*), 29.8 (N8CH<sub>3</sub>), 25.0 (C12), 24.9 (C12\*), 20.6 (2C, C13, C13\*), 18.6 (C3''), 18.1 (C3''\*), 14.3 (C4''), 14.2 (C4''\*).

FTIR (thin film) cm<sup>-1</sup>:

3321 (br-m), 3052 (w), 2961 (m), 2930 (m), 2876 (m), 1639 (m), 1596 (m), 1494 (m), 1427 (m), 1408 (m), 1339 (m), 1265 (m), 1090 (m), 1003 (w), 739 (m).

HRMS (ESI) (*m/z*):

calc'd for C<sub>30</sub>H<sub>37</sub>N<sub>4</sub>O<sub>2</sub> [M+H]<sup>+</sup>: 485.2911,  
found: 485.2913.

[α]<sub>D</sub><sup>23</sup>:

-168 (*c* = 0.38, MeOH).<sup>65</sup>

TLC (30% acetone in hexanes), R<sub>f</sub>:

0.19 (UV, CAM).

---

65. Literature value: [α]<sub>D</sub><sup>25</sup> = -167 (*c* = 0.024, MeOH), see Dalsgaard, P. W.; Blunt, J. W.; Munro, M. H. G.; Frisvad, J. C.; Christophersen, C. *J. Nat. Prod.* **2005**, *68*, 258.

**Table S12. Comparison of our <sup>1</sup>H NMR data for (–)-communesin H (8) with literature data (CDCl<sub>3</sub>, major atropisomer):**

| Assignment        | Christophersen's Isolation Report <sup>60,61</sup><br>(–)-Communesin H (8)<br><sup>1</sup> H NMR, 500 MHz, CDCl <sub>3</sub> | This Work<br>(–)-Communesin H (8)<br><sup>1</sup> H NMR, 500 MHz, CDCl <sub>3</sub>      |
|-------------------|------------------------------------------------------------------------------------------------------------------------------|------------------------------------------------------------------------------------------|
| C2                | 3.44 (m, 1H)<br>3.36 (m, 1H)                                                                                                 | 3.46 (app-dd, <i>J</i> = 15.8, 9.5 Hz, 1H)<br>3.35 (app-dt, <i>J</i> = 16.2, 8.7 Hz, 2H) |
| C3                | 2.35 (m, 1H)<br>2.27 (m, 1H)                                                                                                 | 2.40–2.31 (m, 3H)<br>2.31–2.22 (m, 4H)                                                   |
| C3a               | –                                                                                                                            | –                                                                                        |
| C4a               | –                                                                                                                            | –                                                                                        |
| C4                | –                                                                                                                            | –                                                                                        |
| C5                | 6.07 (d, <i>J</i> = 7.7 Hz, 1H)                                                                                              | 6.07 (d, <i>J</i> = 7.8 Hz, 1H)                                                          |
| C6                | 6.89 (t, <i>J</i> = 7.7 Hz, 1H)                                                                                              | 6.88 (t, <i>J</i> = 7.7 Hz, 1H)                                                          |
| C7                | 5.95 (d, <i>J</i> = 7.7 Hz, 1H)                                                                                              | 5.95 (d, <i>J</i> = 7.8 Hz, 1H)                                                          |
| C7a               | –                                                                                                                            | –                                                                                        |
| N8CH <sub>3</sub> | 2.84 (s, 3H)                                                                                                                 | 2.89–2.81 (m, 8H)                                                                        |
| C8a               | 4.69 (s, 1H)                                                                                                                 | 4.69 (s, 1H)                                                                             |
| C9                | 4.10 (d, <i>J</i> = 9.0 Hz, 1H)                                                                                              | 4.10 (d, <i>J</i> = 9.0 Hz, 1H)                                                          |
| C10               | 2.86 (m, 1H)                                                                                                                 | 2.89–2.81 (m, 8H)                                                                        |
| C11               | –                                                                                                                            | –                                                                                        |
| C12               | 1.39 (s, 3H)                                                                                                                 | 1.39 (s, 3H)                                                                             |
| C13               | 1.54 (s, 3H)                                                                                                                 | 1.55 (s, 3H)                                                                             |
| C2'               | 3.88 (dd, <i>J</i> = 11.8, 8.6 Hz, 1H)<br>3.00 (ddd, <i>J</i> = 11.8, 11.5, 7.4 Hz, 1H)                                      | 3.88 (app-dd, <i>J</i> = 11.6, 8.9 Hz, 1H)<br>3.00 (app-td, <i>J</i> = 11.6, 7.2 Hz, 1H) |
| C3'               | 2.72 (ddd, <i>J</i> = 13.2, 11.5, 8.6 Hz, 1H)<br>1.96 (dd, <i>J</i> = 13.2, 7.4 Hz, 1H)                                      | 2.77–2.66 (m, 1H)<br>1.96 (app-dd, <i>J</i> = 13.1, 7.0 Hz, 1H)                          |
| C3a'              | –                                                                                                                            | –                                                                                        |
| C4a'              | –                                                                                                                            | –                                                                                        |
| C4'               | 6.66 (m, 1H)                                                                                                                 | 6.73–6.63 (m, 5H)                                                                        |
| C5'               | 6.68 (m, 1H)                                                                                                                 | 6.73–6.63 (m, 5H)                                                                        |
| C6'               | 6.99 (td, <i>J</i> = 7.5, 1.5 Hz, 1H)                                                                                        | 7.00 (app-td, <i>J</i> = 7.5, 1.5 Hz, 2H)                                                |
| C7'               | 6.70 (m, 1H)                                                                                                                 | 6.73–6.63 (m, 5H)                                                                        |
| C7a'              | –                                                                                                                            | –                                                                                        |
| C8a'              | 5.04 (s, 1H)                                                                                                                 | 5.04 (d, <i>J</i> = 1.4 Hz, 1H)                                                          |
| C1''              | –                                                                                                                            | –                                                                                        |
| C2''              | 2.84 (m, 1H)<br>2.35 (m, 1H)                                                                                                 | 2.89–2.81 (m, 8H)<br>2.40–2.31 (m, 3H)                                                   |
| C3''              | 1.75 (m, 2H)                                                                                                                 | 1.85–1.67 (m, 4H)                                                                        |
| C4''              | 1.00 (t, <i>J</i> = 7.4 Hz, 3H)                                                                                              | 1.01 (t, <i>J</i> = 7.4 Hz, 3H)                                                          |
| N8'H              | –                                                                                                                            | 4.59 (br-s, 1H)                                                                          |

**Table S13. Comparison of our <sup>13</sup>C NMR data for (–)-communesin H (8) with literature data (CDCl<sub>3</sub>, major atropisomer):**

| Assignment        | Christophersen's Isolation Report <sup>60,62</sup><br>(–)-Communesin H (8)<br><sup>13</sup> C NMR, 75 MHz CDCl <sub>3</sub> | This Work<br>(–)-Communesin H (8)<br><sup>13</sup> C NMR, 150.9 MHz, CDCl <sub>3</sub> | Chemical Shift Difference<br>Δδ = δ (this work) –<br>δ (Christophersen report) |
|-------------------|-----------------------------------------------------------------------------------------------------------------------------|----------------------------------------------------------------------------------------|--------------------------------------------------------------------------------|
| C2                | 36.3                                                                                                                        | 36.5                                                                                   | 0.2                                                                            |
| C3                | 38.1                                                                                                                        | 38.3                                                                                   | 0.2                                                                            |
| C3a               | 51.9                                                                                                                        | 51.7                                                                                   | <b>-0.2<sup>66</sup></b>                                                       |
| C4a               | 132.3                                                                                                                       | 132.5                                                                                  | 0.2                                                                            |
| C4                | 136.9                                                                                                                       | 137.2                                                                                  | 0.3                                                                            |
| C5                | 113.2                                                                                                                       | 113.4                                                                                  | 0.2                                                                            |
| C6                | 128.8                                                                                                                       | 129.0                                                                                  | 0.2                                                                            |
| C7                | 101.7                                                                                                                       | 102.0                                                                                  | 0.3                                                                            |
| C7a               | 150.5                                                                                                                       | 150.8                                                                                  | 0.3                                                                            |
| N8CH <sub>3</sub> | 29.6                                                                                                                        | 29.8                                                                                   | 0.2                                                                            |
| C8a               | 82.4                                                                                                                        | 82.8                                                                                   | 0.4                                                                            |
| C9                | 65.2                                                                                                                        | 65.5                                                                                   | 0.3                                                                            |
| C10               | 63.9                                                                                                                        | 64.2                                                                                   | 0.3                                                                            |
| C11               | 59.6                                                                                                                        | 59.8                                                                                   | 0.2                                                                            |
| C12               | 24.8                                                                                                                        | 25.0                                                                                   | 0.2                                                                            |
| C13               | 20.4                                                                                                                        | 20.6                                                                                   | 0.2                                                                            |
| C2'               | 44.0                                                                                                                        | 44.2                                                                                   | 0.2                                                                            |
| C3'               | 30.8                                                                                                                        | 30.8                                                                                   | 0.0                                                                            |
| C3a'              | 51.4                                                                                                                        | 52.2                                                                                   | <b>0.8<sup>66</sup></b>                                                        |
| C4a'              | 132.4                                                                                                                       | 132.8                                                                                  | 0.4                                                                            |
| C4'               | 123.2                                                                                                                       | 123.4                                                                                  | 0.2                                                                            |
| C5'               | 116.9                                                                                                                       | 120.7                                                                                  | <b>3.8<sup>67</sup></b>                                                        |
| C6'               | 127.3                                                                                                                       | 127.5                                                                                  | 0.2                                                                            |
| C7'               | 120.5                                                                                                                       | 117.1                                                                                  | <b>-3.4<sup>67</sup></b>                                                       |
| C7a'              | 142.6                                                                                                                       | 142.9                                                                                  | 0.3                                                                            |
| C8a'              | 78.9                                                                                                                        | 79.2                                                                                   | 0.3                                                                            |
| C1''              | 174.5                                                                                                                       | 174.6                                                                                  | 0.1                                                                            |
| C2''              | 36.6                                                                                                                        | 36.8                                                                                   | 0.2                                                                            |
| C3''              | 18.4                                                                                                                        | 18.6                                                                                   | 0.2                                                                            |
| C4''              | 14.2                                                                                                                        | 14.3                                                                                   | 0.1                                                                            |

66. Our revised assignment of C3a and C3a' resonances is supported by key gHMBC correlations (<sup>1</sup>H, <sup>13</sup>C) in ppm: (6.07,51.7), (3.46,51.7), (6.73,52.2), and (3.88,52.2).

67. Our revised assignment of C5' and C7' resonances is supported by a key 4-bond gHMBC correlation (<sup>1</sup>H, <sup>13</sup>C) in ppm: (4.69,117.1).



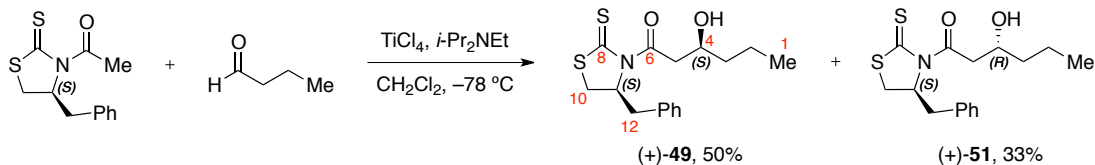

### **Aldol adducts (+)-49 and (+)-51:**

A sample of (*S*)-1-(4-benzyl-2-thioxothiazolidin-3-yl)ethan-1-one<sup>68</sup> (648 mg, 2.58 mmol, 1 equiv) was azeotropically dried by concentration from anhydrous benzene (2 × 5 mL). The residue was dissolved in dichloromethane (8.0 mL) and the resulting bright-yellow solution was cooled to  $-78\text{ }^{\circ}\text{C}$ . A freshly-prepared solution of titanium(IV) chloride (489 mg, 2.58 mmol, 1.00 equiv) in dichloromethane (2.0 mL) was then added dropwise over 4 min. The transfer was quantitated with additional dichloromethane (1.0 mL). After stirring at  $-78\text{ }^{\circ}\text{C}$  for 10 min, *N,N*-diisopropylethylamine (898  $\mu\text{L}$ , 5.15 mmol, 2.00 equiv) was added dropwise via syringe over 4 min to the resulting bright-orange viscous suspension causing an immediate color change to dark burgundy. After 1 h, a solution of butyraldehyde (697  $\mu\text{L}$ , 7.73 mmol, 3.00 equiv) in dichloromethane (4.0 mL) was added dropwise via syringe over 3 min and the transfer was quantitated with additional dichloromethane (1.0 mL). After 45 min, the resulting homogeneous burgundy-orange solution was diluted with a saturated aqueous ammonium chloride solution (20 mL) and deionized water (20 mL). The cooling bath was removed and the mixture was allowed to warm to  $23\text{ }^{\circ}\text{C}$ . The layers were separated and the aqueous layer was extracted with dichloromethane (2 × 25 mL). The combined organic extracts were washed sequentially with an aqueous sodium bisulfite solution (1 M, 3 × 40 mL) and a saturated aqueous sodium chloride solution (40 mL), were dried over anhydrous sodium sulfate, were filtered, and were concentrated under reduced pressure. The residue was purified by flash column chromatography on silica gel (eluent: 30%→40% diethyl ether in hexanes) to afford impure aldol adducts (+)-49 (more polar) and (+)-51 (less polar) as viscous yellow oils. Each sample was independently subjected to a second chromatographic purification on silica gel (eluent: 0%→2% diethyl ether in dichloromethane) to afford pure (11*S*,4*S*)-adduct (+)-49 (420 mg, 50.3%) as a bright-yellow viscous oil and pure (11*S*,4*R*)-adduct (+)-51 (278 mg, 33.4%) as a bright-yellow solid.<sup>69</sup> Structural assignments were made using additional information from gCOSY, gHSQC, and gHMBC experiments.

### **(11*S*,4*S*)-Aldol adduct (+)-49:**

<sup>1</sup>H NMR (500 MHz, CDCl<sub>3</sub>, 20 °C):

$\delta$  7.38–7.31 (m, 2H, Ph-*m*-H), 7.31–7.26 (m, 3H, Ph-*o*-H, Ph-*p*-H), 5.40 (app-ddd,  $J = 10.8, 7.1, 4.0$  Hz, 1H, C11H), 4.21–4.12 (m, 1H, C4H), 3.64 (dd,  $J = 17.8, 2.4$  Hz, 1H, C5H<sub>a</sub>), 3.40 (ddd,  $J = 11.6, 7.2, 1.0$  Hz, 1H, C10H<sub>a</sub>), 3.22 (dd,  $J = 13.2, 4.0$  Hz, 1H, C12H<sub>a</sub>), 3.13 (dd,  $J = 17.8, 9.5$  Hz, 1H, C5H<sub>b</sub>), 3.05 (dd,  $J = 13.2, 10.5$  Hz, 1H, C12H<sub>b</sub>), 2.89 (d,  $J = 11.6$  Hz, 1H, C10H<sub>b</sub>), 2.77 (d, 1H,  $J = 3.9$  Hz, C4OH), 1.64–1.54 (m, 1H, C3H<sub>a</sub>), 1.54–1.34 (m, 3H, C2H<sub>2</sub>, C3H<sub>b</sub>), 0.95 (t,  $J = 6.9$  Hz, 3H, C1H<sub>3</sub>).

<sup>13</sup>C NMR (125.8 MHz, CDCl<sub>3</sub>, 24 °C):

$\delta$  201.5 (C8), 173.4 (C6), 136.5 (Ph-*ipso*-C), 129.5 (Ph-*o*-C), 129.0 (Ph-*m*-C), 127.4 (Ph-*p*-C), 68.4 (C11), 67.7 (C4), 46.0 (C5), 38.6 (C3), 36.9 (C12), 32.2 (C10), 18.9 (C2), 14.1 (C1).

68. Kitir, B.; Baldry, M.; Ingmer, H.; Olsen, C. A. *Tetrahedron* **2014**, *70*, 7721.

69. The relative stereochemical configuration of aldol adducts (+)-49 and (+)-51 were determined by polarimetric analysis of the corresponding carboxylic acids after hydrolysis, as described later in this document.

|                                             |                                                                                                                      |
|---------------------------------------------|----------------------------------------------------------------------------------------------------------------------|
| FTIR (thin film) $\text{cm}^{-1}$ :         | 3448 (br-w), 2957 (m), 2930 (m), 1691 (s), 1455 (m), 1342 (s), 1267 (s), 1192 (m), 1138 (s), 1044 (s).               |
| HRMS (ESI) ( $m/z$ ):                       | calc'd for $\text{C}_{16}\text{H}_{21}\text{NNaO}_2\text{S}_2$ $[\text{M}+\text{Na}]^+$ : 346.0906, found: 346.0914. |
| $[\alpha]_{\text{D}}^{23}$ :                | +234 ( $c = 0.89$ , $\text{CH}_2\text{Cl}_2$ ).                                                                      |
| TLC (40% diethyl ether in hexanes), $R_f$ : | 0.16 (UV, CAM).                                                                                                      |

**(11S,4R)-Aldol adduct (+)-51:**

|                                                           |                                                                                                                                                                                                                                                                                                                                                                                                                                                                                                                                                                                                                                                                                                                 |
|-----------------------------------------------------------|-----------------------------------------------------------------------------------------------------------------------------------------------------------------------------------------------------------------------------------------------------------------------------------------------------------------------------------------------------------------------------------------------------------------------------------------------------------------------------------------------------------------------------------------------------------------------------------------------------------------------------------------------------------------------------------------------------------------|
| $^1\text{H}$ NMR (500 MHz, $\text{CDCl}_3$ , 25 °C):      | $\delta$ 7.38–7.32 (m, 2H, Ph- <i>m</i> -H), 7.31–7.26 (m, 3H, Ph- <i>o</i> -H, Ph- <i>p</i> -H), 5.41 (app-ddd, $J = 10.8, 7.1, 4.0$ Hz, 1H, C11H), 4.07 (dddd, $J = 9.9, 7.4, 4.3, 2.5$ Hz, 1H, C4H), 3.46 (dd, $J = 17.5, 9.4$ Hz, 1H, C5H <sub>a</sub> ), 3.40 (dd, $J = 11.6, 7.2$ Hz, 1H, C10H <sub>a</sub> ), 3.33 (dd, $J = 17.5, 2.6$ Hz, 1H, C5H <sub>b</sub> ), 3.22 (dd, $J = 13.2, 4.0$ Hz, 1H, C12H <sub>a</sub> ), 3.13 (br-s, 1H, C4OH), 3.04 (dd, $J = 13.2, 10.4$ Hz, 1H, C12H <sub>b</sub> ), 2.91 (d, $J = 11.6$ Hz, 1H, C10H <sub>b</sub> ), 1.64–1.53 (m, 1H, C3H <sub>a</sub> ), 1.53–1.34 (m, 3H, C2H <sub>2</sub> , C3H <sub>b</sub> ), 0.94 (t, $J = 6.9$ Hz, 3H, C1H <sub>3</sub> ). |
| $^{13}\text{C}$ NMR (125.8 MHz, $\text{CDCl}_3$ , 25 °C): | $\delta$ 201.6 (C8), 174.0 (C6), 136.5 (Ph- <i>ipso</i> -C), 129.5 (Ph- <i>o</i> -C), 129.1 (Ph- <i>m</i> -C), 127.4 (Ph- <i>p</i> -C), 68.3 (2C, C4, C11), 45.6 (C5), 38.9 (C3), 36.9 (C12), 32.1 (C10), 18.8 (C2), 14.1 (C1).                                                                                                                                                                                                                                                                                                                                                                                                                                                                                 |
| FTIR (thin film) $\text{cm}^{-1}$ :                       | 3435 (br-w), 2957 (m), 2930 (m), 1693 (m), 1454 (w), 1342 (s), 1293 (m), 1259 (s), 1164 (s), 1138 (s), 1041 (m).                                                                                                                                                                                                                                                                                                                                                                                                                                                                                                                                                                                                |
| HRMS (ESI) ( $m/z$ ):                                     | calc'd for $\text{C}_{16}\text{H}_{21}\text{NNaO}_2\text{S}_2$ $[\text{M}+\text{Na}]^+$ : 346.0906, found: 346.0901.                                                                                                                                                                                                                                                                                                                                                                                                                                                                                                                                                                                            |
| $[\alpha]_{\text{D}}^{23}$ :                              | +160 ( $c = 0.81$ , $\text{CH}_2\text{Cl}_2$ ).                                                                                                                                                                                                                                                                                                                                                                                                                                                                                                                                                                                                                                                                 |
| TLC (40% diethyl ether in hexanes), $R_f$ :               | 0.28 (UV, CAM).                                                                                                                                                                                                                                                                                                                                                                                                                                                                                                                                                                                                                                                                                                 |

### Determination of the Relative Stereochemistry of Aldol Adducts (+)-49 and (+)-51:

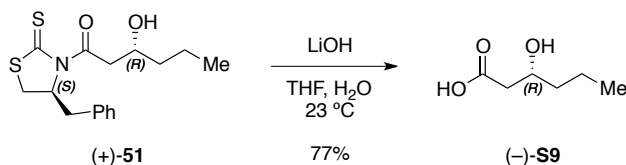

#### (-)-(3R)-Hydroxyhexanoic acid (S9):

An aqueous lithium hydroxide solution (1.0 M, 1.8 mL, 1.8 mmol, 4.0 equiv) was added to a bright-yellow solution of (1*S*,4*R*)-aldol adduct (+)-51 (143 mg, 0.440 mmol, 1 equiv) in tetrahydrofuran (2.20 mL) at 23 °C. After 30 min, the resulting off-white turbid solution was concentrated under reduced pressure to remove tetrahydrofuran. The aqueous suspension was diluted with deionized water (10 mL) and was washed with ethyl acetate (4 × 10 mL) to remove residual (*S*)-4-benzylthiazolidine-2-thione. The aqueous layer was acidified to pH ~ 1 by adding an aqueous hydrogen chloride solution (1 M, 3 mL) and was extracted with ethyl acetate (3 × 10 mL). The combined organic extracts were dried over anhydrous sodium sulfate, were filtered, and were concentrated under reduced pressure to yield (-)-(3*R*)-hydroxyhexanoic acid (S9, 44.0 mg, 76.6%) as a colorless viscous oil. Spectral data were in agreement with those previously reported in the literature.<sup>68</sup>

<sup>1</sup>H NMR (500 MHz, CDCl<sub>3</sub>, 20 °C): δ 7.62 (br-s, 1H), 4.05 (tdd, *J* = 7.9, 4.5, 3.1 Hz, 1H), 2.55 (dd, *J* = 16.5, 3.2 Hz, 1H), 2.46 (dd, *J* = 16.5, 9.1 Hz, 1H), 1.60–1.28 (m, 4H), 0.92 (t, *J* = 7.0 Hz, 3H).

<sup>13</sup>C NMR (100.6 MHz, CDCl<sub>3</sub>, 25 °C): δ 178.0, 68.0, 41.3, 38.6, 18.8, 14.0.

[α]<sub>D</sub><sup>23</sup>: -28 (*c* = 2.20, CHCl<sub>3</sub>).<sup>70</sup>

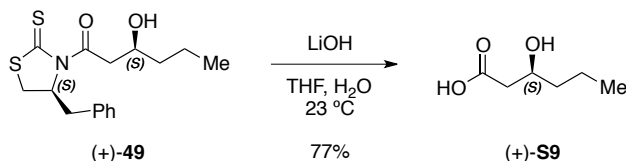

#### (+)-(3S)-Hydroxyhexanoic acid (S9):

An aqueous lithium hydroxide solution (1.0 M, 1.7 mL, 1.7 mmol, 4.0 equiv) was added to a bright-yellow solution of (1*S*,4*S*)-aldol adduct (+)-49 (138 mg, 0.430 mmol, 1 equiv) in tetrahydrofuran (1.50 mL) at 23 °C. After 30 min, the resulting off-white turbid solution was concentrated under reduced pressure to remove tetrahydrofuran. The aqueous suspension was diluted with deionized water (10 mL) and was washed with ethyl acetate (4 × 10 mL) to remove residual (*S*)-4-benzylthiazolidine-2-thione. The aqueous layer was acidified to pH ~ 1 by adding an aqueous hydrogen chloride solution (1 M, 3 mL) and was extracted with ethyl acetate (3 × 10 mL). The combined organic extracts were dried over anhydrous sodium sulfate, were filtered, and were concentrated under reduced pressure to yield (+)-(3*S*)-hydroxyhexanoic acid (S9, 43.6 mg, 77.2%) as a colorless semi-solid. Spectral data for (+)-(3*S*)-S9 were identical to those obtained for (-)-(3*R*)-S9 as described above.

[α]<sub>D</sub><sup>23</sup>: +25 (*c* = 2.18, CHCl<sub>3</sub>).<sup>71</sup>

70. Literature value: [α]<sub>D</sub><sup>25</sup> = -27.3 (*c* = 2.1, CHCl<sub>3</sub>), see Evans, D. A.; Bartroli, J.; Shih, T. L. *J. Am. Chem. Soc.* **1981**, *103*, 2127.

71. Literature value: [α]<sub>D</sub> = +27 (*c* = 1.2, CHCl<sub>3</sub>), see Hsiao, C.-N.; Liu, L.; Miller, M. J. *J. Org. Chem.* **1987**, *52*, 2201.

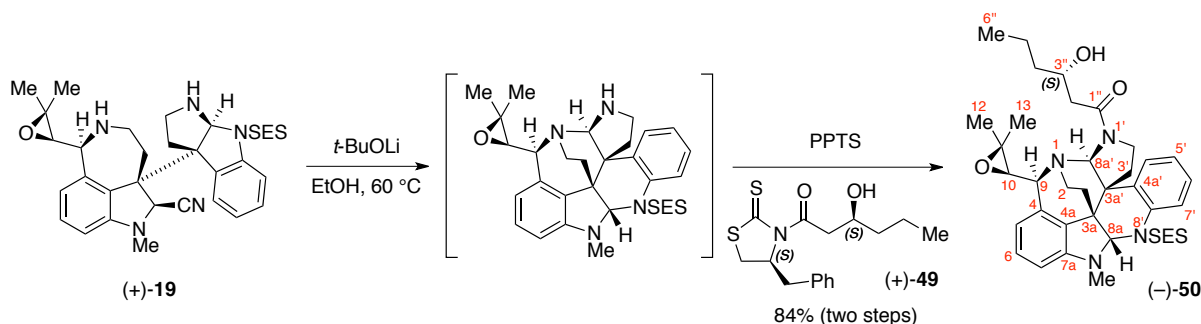

**(-)-N8'-(Trimethylsilyl)ethanesulfonyl (C3''S)-communesin I (50):**

A sample of lithium *tert*-butoxide (11.5 mg, 143  $\mu\text{mol}$ , 10.0 equiv) was added to a solution of heterodimer (+)-19 (8.67 mg, 14.3  $\mu\text{mol}$ , 1 equiv) in anhydrous ethanol (200 proof, 380  $\mu\text{L}$ ) at 23  $^\circ\text{C}$ . The flask was sealed with a Teflon-lined glass stopper under an argon atmosphere and was immersed in a preheated oil bath at 60  $^\circ\text{C}$ . After 18.5 h, the reaction mixture was cooled to 23  $^\circ\text{C}$  and a sample of pyridinium *p*-toluenesulfonate (PPTS, 28.8 mg, 114  $\mu\text{mol}$ , 8.00 equiv) was added as a solid followed by a solution of (1*S*,4*S*)-aldol adduct (+)-49 (253 mg, 782  $\mu\text{mol}$ , 54.7 equiv) in dichloromethane (500  $\mu\text{L}$ ). The transfer was quantitated with additional dichloromethane (300  $\mu\text{L}$ ). After 50 min, the solution was diluted with a saturated aqueous sodium bicarbonate solution (5 mL) and deionized water (5 mL) and the resulting mixture was extracted with ethyl acetate (3  $\times$  5 mL). The combined organic extracts were washed with a saturated aqueous sodium chloride solution (10 mL), were dried over anhydrous sodium sulfate, were filtered, and were concentrated under reduced pressure. The residue was purified by flash column chromatography on silica gel (eluent: 20% $\rightarrow$ 30% acetone in hexanes) to afford (-)-N8'-(trimethylsilyl)ethanesulfonyl (C3''S)-communesin I (50, 8.27 mg, 83.5%) as a white solid. Structural assignments were made using additional information from gCOSY, gHSQC, gHMBC, and 1D selective NOESY experiments.

$^1\text{H}$  NMR (600 MHz,  $\text{CDCl}_3$ , 20  $^\circ\text{C}$ , 15:1 mixture of atropisomers, \*denotes minor atropisomer):  
 $\delta$  7.54 (dd,  $J = 8.0, 1.2$  Hz, 1H, C7'H), 7.42 (d,  $J = 8.5$  Hz, 1H, C7'H\*), 7.20 (app-td,  $J = 7.7, 1.4$  Hz, 2H, C6'H, C6'H\*), 7.07 (app-td,  $J = 7.6, 1.2$  Hz, 2H, C5'H, C5'H\*), 6.91 (app-t,  $J = 7.7$  Hz, 2H, C6'H, C6'H\*), 6.84 (dd,  $J = 7.7, 1.4$  Hz, 1H, C4'H), 6.74–6.70 (m, 1H, C4'H\*), 6.15 (d,  $J = 7.6$  Hz, 1H, C5'H\*), 6.10 (d,  $J = 7.7$  Hz, 1H, C5'H), 5.98 (d,  $J = 7.8$  Hz, 1H, C7'H), 5.96 (d,  $J = 7.0$  Hz, 1H, C7'H\*), 5.71 (s, 1H, C8a'H), 5.64 (s, 1H, C8a'H\*), 5.50 (br-s, 1H, C8a'H\*), 5.08 (d,  $J = 1.6$  Hz, 1H, C8a'H), 4.20–4.15 (m, 1H, C3''H), 4.06 (d,  $J = 9.1$  Hz, 1H, C9H), 4.01 (br-s, 1H, C3''OH), 3.94 (app-dd,  $J = 11.7, 9.0$  Hz, 1H, C2'H<sub>a</sub>), 3.47 (app-dd,  $J = 15.9, 9.7$  Hz, 1H, C2'H<sub>a</sub>), 3.33 (app-dt,  $J = 16.5, 8.8$  Hz, 1H, C2'H<sub>b</sub>), 3.25 (app-td,  $J = 13.5, 4.7$  Hz, 1H, N8'SO<sub>2</sub>CH<sub>a</sub>), 3.22–3.11 (m, 2H, C2''H<sub>a</sub>, N8'SO<sub>2</sub>CH<sub>b</sub>), 3.08 (app-td,  $J = 11.6, 7.3$  Hz, 1H, C2'H<sub>b</sub>), 2.92 (s, 3H, N8CH<sub>3</sub>), 2.87 (s, 3H, N8CH<sub>3</sub>\*), 2.84 (d,  $J = 9.1$  Hz, 1H, C10H), 2.83–2.77 (m, 1H, C3'H<sub>a</sub>), 2.49 (app-dd,  $J = 13.0, 8.7$  Hz, 1H, C3'H<sub>a</sub>), 2.36 (app-dd,  $J = 16.4, 9.8$  Hz, 1H, C2''H<sub>b</sub>), 2.29 (app-dt,  $J = 13.1, 9.4$  Hz, 1H, C3'H<sub>b</sub>), 1.95 (app-dd,  $J = 13.1, 7.2$  Hz, 1H, C3'H<sub>b</sub>), 1.61–1.41 (m, 7H, C13H<sub>3</sub>, C4''H<sub>2</sub>, C5''H<sub>2</sub>), 1.38 (s, 3H, C12H<sub>3</sub>), 1.30–1.15 (m, 2H,

N8'SO<sub>2</sub>CH<sub>2</sub>CH<sub>2</sub>), 0.96 (t,  $J = 7.0$  Hz, 3H, C6''H<sub>3</sub>), 0.92 (t,  $J = 7.3$  Hz, 3H, C6''H<sub>3</sub>\*), 0.11 (s, 9H, Si(CH<sub>3</sub>)<sub>3</sub>\*), 0.07 (s, 9H, Si(CH<sub>3</sub>)<sub>3</sub>).

<sup>13</sup>C NMR (150.9 MHz, CDCl<sub>3</sub>, 20 °C, 15:1 mixture of atropisomers, \*denotes minor atropisomer):  
δ 174.1 (C1''), 149.9 (C7a), 138.2 (C4a'), 136.9 (C4), 136.0 (C7a'), 131.2 (C4a), 129.5 (C6), 128.0 (C6'), 126.5 (C5'), 124.9 (C7'), 124.0 (C4'), 113.9 (C5), 102.7 (C7), 84.7 (C8a), 79.5 (C8a'), 68.1 (C3''), 65.6 (C9), 63.8 (C10), 60.0 (C11), 54.2 (C3a), 52.5 (C3a'), 52.0 (N8'SO<sub>2</sub>CH<sub>2</sub>), 44.0 (C2'), 41.3 (C2''), 38.9 (C4''), 37.7 (C3), 36.5 (C2), 31.5 (C3'), 31.0 (N8CH<sub>3</sub>), 25.0 (C12), 20.5 (C13), 18.9 (C5''\*), 18.8 (C5''), 14.3 (C6''), 14.2 (C6''\*), 10.8 (N8'SO<sub>2</sub>CH<sub>2</sub>CH<sub>2</sub>\*), 10.7 (N8'SO<sub>2</sub>CH<sub>2</sub>CH<sub>2</sub>), -1.7 (Si(CH<sub>3</sub>)<sub>3</sub>\*), -1.8 (Si(CH<sub>3</sub>)<sub>3</sub>).

FTIR (thin film) cm<sup>-1</sup>: 3438 (br-m), 2957 (s), 1630 (s), 1600 (s), 1487 (s), 1455 (s), 1340 (s), 1251 (s), 1156 (s), 1053 (m), 859 (m), 844 (m), 740 (m).

HRMS (ESI) ( $m/z$ ): calc'd for C<sub>37</sub>H<sub>53</sub>N<sub>4</sub>O<sub>5</sub>SSi [M+H]<sup>+</sup>: 693.3500, found: 693.3503

[α]<sub>D</sub><sup>23</sup>: -100 ( $c = 0.41$ , CH<sub>2</sub>Cl<sub>2</sub>).

TLC (30% acetone in hexanes), R<sub>f</sub>: 0.27 (UV, CAM).

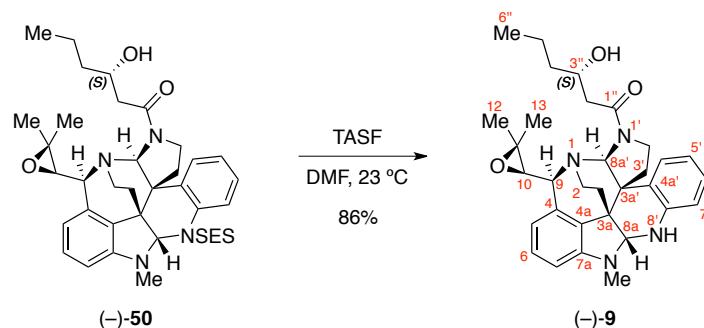

**(-)-(C3''S)-Communesin I (9):**

A degassed solution of tris(dimethylamino)sulfonium difluorotrimethylsilicate (TASF, 12.3 mg, 44.6  $\mu\text{mol}$ , 4.00 equiv) in *N,N*-dimethylformamide (100  $\mu\text{L}$ ) was added to a degassed solution of (-)-*N*8'-(trimethylsilyl)ethanesulfonyl (C3''S)-communesin I (**50**, 7.73 mg, 11.2  $\mu\text{mol}$ , 1 equiv) in *N,N*-dimethylformamide (300  $\mu\text{L}$ ) at 23  $^\circ\text{C}$ . After 2.2 h, a saturated aqueous sodium chloride solution (10 mL) and deionized water (5 mL) were added and the mixture was extracted with ethyl acetate (3  $\times$  10 mL). The combined organic extracts were washed with a saturated aqueous sodium chloride solution (2  $\times$  15 mL), were dried over anhydrous sodium sulfate, were filtered, and were concentrated under reduced pressure. The resulting residue was purified by flash column chromatography on silica gel (eluent: 50% $\rightarrow$ 60% ethyl acetate in hexanes) to afford (-)-(C3''S)-Communesin I (**9**, 5.08 mg, 86.1%) as a white solid. Structural assignments were made using additional information from gCOSY, gHSQC, gHMBC, and 1D selective NOESY experiments.

$^1\text{H}$  NMR (500 MHz,  $\text{CDCl}_3$ , 20  $^\circ\text{C}$ , 34:1 mixture of atropisomers, \*denotes minor atropisomer):

$\delta$  7.01 (app-td,  $J = 7.6, 1.5$  Hz, 1H, C6'H), 6.89 (t,  $J = 7.8$  Hz, 1H, C6'H), 6.86 (t,  $J = 7.9$  Hz, 1H, C6'H\*), 6.72 (app-td,  $J = 7.4, 1.2$  Hz, 1H, C5'H), 6.70–6.64 (m, 1H, C7'H, C4'H), 6.60 (d,  $J = 6.6$  Hz, 1H, C4'H\*), 6.09 (d,  $J = 7.7$  Hz, 1H, C5'H\*), 6.06 (d,  $J = 7.6$  Hz, 1H, C5'H), 5.95 (d,  $J = 7.6$  Hz, 1H, C7'H), 5.91 (d,  $J = 8.1$  Hz, 1H, C7'H\*), 5.41 (app-s, 1H, C8a'H\*), 5.04 (app-s, 1H, C8a'H), 4.70 (s, 1H, C8a'H), 4.67 (s, 1H, C8a'H\*), 4.59 (br-s, 1H, N8'H), 4.46 (d,  $J = 8.7$  Hz, 1H, C9'H\*), 4.22–4.12 (m, 1H, C3''H), 4.19 (d,  $J = 2.0$  Hz, 1H, C3''OH), 4.05 (d,  $J = 9.2$  Hz, 1H, C9'H), 3.89 (app-dd,  $J = 11.8, 8.3$  Hz, 1H, C2'H<sub>a</sub>), 3.45 (app-ddt,  $J = 16.1, 9.6, 1.6$  Hz, 1H, C2'H<sub>a</sub>), 3.34 (app-dt,  $J = 15.9, 8.8$  Hz, 1H, C2'H<sub>b</sub>), 3.21 (dd,  $J = 16.4, 2.2$  Hz, 1H, C2''H<sub>a</sub>), 3.00 (app-td,  $J = 11.7, 7.2$  Hz, 1H, C2''H<sub>b</sub>), 2.87 (d,  $J = 9.2$  Hz, 1H, C10'H), 2.84 (s, 3H, N8CH<sub>3</sub>), 2.81 (s, 3H, N8CH<sub>3</sub>\*), 2.80 (d,  $J = 8.8$  Hz, 1H, C10'H\*), 2.72 (ddd,  $J = 13.3, 11.6, 8.7$  Hz, 1H, C3'H<sub>a</sub>), 2.40–2.31 (m, 2H, C3'H<sub>a</sub>, C2''H<sub>b</sub>), 2.27 (app-dt,  $J = 13.0, 9.4$  Hz, 1H, C3'H<sub>b</sub>), 1.99 (app-dd,  $J = 13.3, 6.7$  Hz, 1H, C3'H<sub>b</sub>), 1.59–1.43 (m, 10H, C13H<sub>3</sub>, C13H<sub>3</sub>\*, C4''H<sub>2</sub>, C5''H<sub>2</sub>), 1.39 (s, 3H, C12H<sub>3</sub>), 1.36 (s, 3H, C12H<sub>3</sub>\*), 0.96 (t,  $J = 7.1$  Hz, 3H, C6''H<sub>3</sub>).

$^{13}\text{C}$  NMR (150.9 MHz,  $\text{CDCl}_3$ , 25  $^\circ\text{C}$ , 34:1 mixture of atropisomers, \*denotes minor atropisomer):  
 $\delta$  174.5 (C1''), 150.7 (C7a), 142.7 (C7a'), 136.6 (C4),

132.3 (2C, C4a, C4a'), 129.1 (C6), 127.6 (C6'), 123.4 (C4'), 120.9 (C5'), 117.1 (C7'), 113.4 (C5), 102.1 (C7), 82.6 (C8a), 79.2 (C8a'), 68.1 (C3''), 65.6 (C9), 64.1 (C10), 60.0 (C11), 52.1 (C3a'), 51.6 (C3a), 44.1 (C2'), 41.1 (C2''), 38.8 (C4''), 38.1 (C3), 36.4 (C2), 30.7 (C3'), 29.8 (N8CH<sub>3</sub>), 25.0 (C12), 20.5 (C13), 18.8 (C5''), 14.3 (C6'').

FTIR (thin film) cm<sup>-1</sup>:

3429 (br-w), 3330 (br-w), 3052 (w), 2957 (m), 2925 (m), 2873 (m), 1620 (s), 1606 (s), 1596 (s), 1493 (m), 1427 (s), 1338 (m), 1279 (m), 1004 (m), 908 (m), 740 (m).

HRMS (ESI) (*m/z*):

calc'd for C<sub>32</sub>H<sub>41</sub>N<sub>4</sub>O<sub>3</sub> [M+H]<sup>+</sup>: 529.3173,  
found: 529.3155.

[ $\alpha$ ]<sub>D</sub><sup>23</sup>:

-147 (*c* = 0.25, MeOH).

TLC (60% ethyl acetate in hexanes), *R<sub>f</sub>*:

0.15 (UV, CAM).

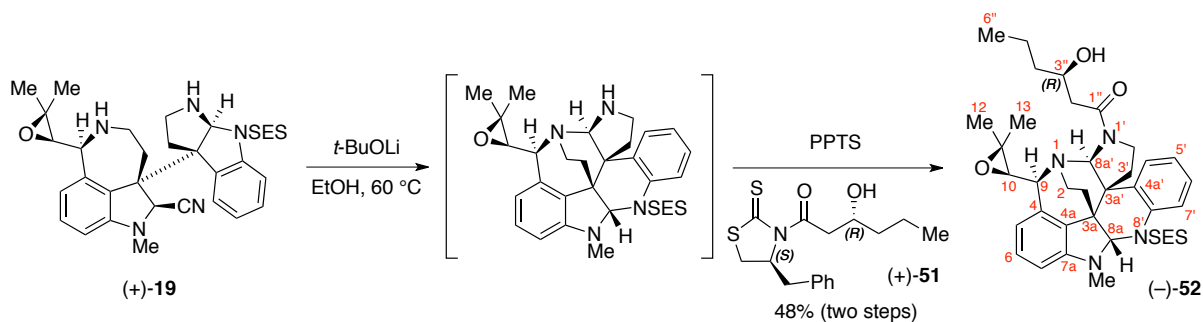

### **(-)-N8'-(Trimethylsilyl)ethanesulfonyl communesin I (52):**

A sample of lithium *tert*-butoxide (12.8 mg, 0.160 mmol, 10.0 equiv) was added to a solution of heterodimer (+)-19 (9.67 mg, 16.0  $\mu$ mol, 1 equiv) in anhydrous ethanol (200 proof, 400  $\mu$ L). The flask was sealed with a Teflon-lined glass stopper under an argon atmosphere and was immersed in a preheated oil bath at 60 °C. After 16 h, the reaction mixture was cooled to 23 °C and samples of pyridinium *p*-toluenesulfonate (PPTS, 34.1 mg, 136  $\mu$ mol, 8.50 equiv) and (1*S*,4*R*)-aldol adduct (+)-51 (77.7 mg, 0.240 mmol, 15.1 equiv) were added sequentially. After 23 min, an additional portion of (+)-51 (79.4 mg, 0.246 mmol, 15.4 equiv) was added. After 47 min, a final portion of (+)-51 (114 mg, 0.352 mmol, 22.1 equiv) was added. After 96 min, a saturated aqueous sodium bicarbonate solution (8 mL) was added and the resulting mixture was extracted with dichloromethane (3  $\times$  5 mL). The combined organic extracts were dried over anhydrous sodium sulfate, were filtered, and were concentrated under reduced pressure. The residue was purified by flash column chromatography on silica gel (eluent: 20%  $\rightarrow$  30% acetone in hexanes) to afford (-)-N8'-(trimethylsilyl)ethanesulfonyl communesin I (52, 5.27 mg, 47.7%) as a white solid. Structural assignments were made using additional information from gCOSY, gHSQC, gHMBC, and 1D selective ROESY experiments.

$^1\text{H}$  NMR (500 MHz,  $\text{CDCl}_3$ , 20 °C, 5.4:1 mixture of atropisomers, \*denotes minor atropisomer):  
 $\delta$  7.56 (dd,  $J = 8.0, 1.2$  Hz, 1H, C7'H), 7.40 (d,  $J = 7.9$  Hz, 1H, C7'H\*), 7.21 (app-td,  $J = 7.8, 1.4$  Hz, 2H, C6'H, C6'H\*), 7.07 (app-td,  $J = 7.6, 1.3$  Hz, 2H, C5'H, C5'H\*), 6.91 (t,  $J = 7.8$  Hz, 2H, C6'H, C6'H\*), 6.83 (dd,  $J = 7.8, 1.4$  Hz, 1H, C4'H), 6.72 (d,  $J = 7.6$  Hz, 1H, C4'H\*), 6.14 (d,  $J = 7.7$  Hz, 1H, C5'H\*), 6.09 (d,  $J = 7.7$  Hz, 1H, C5'H), 5.98 (d,  $J = 7.8$  Hz, 1H, C7'H), 5.94 (d,  $J = 7.7$  Hz, 1H, C7'H\*), 5.72 (s, 1H, C8aH), 5.63 (s, 1H, C8aH\*), 5.45 (s, 1H, C8a'H\*), 5.07 (s, 1H, C8a'H), 4.48 (d,  $J = 8.2$  Hz, 1H, C9'H\*), 4.20–4.14 (m, 1H, C3'H\*), 4.11 (d,  $J = 9.1$  Hz, 1H, C9'H), 4.09–4.03 (m, 1H, C3'H), 3.97 (app-dd,  $J = 12.0, 8.7$  Hz, 1H, C2'H<sub>a</sub>), 3.70 (app-t,  $J = 9.4$  Hz, 1H, C2'H<sub>a</sub>\*), 3.48 (app-dd,  $J = 16.0, 9.6$  Hz, 1H, C2'H<sub>a</sub>), 3.41–3.31 (m, 1H, C2'H<sub>b</sub>), 3.25 (app-td,  $J = 13.3, 4.9$  Hz, 1H, N8'SO<sub>2</sub>CH<sub>a</sub>), 3.17 (app-td,  $J = 13.4, 4.9$  Hz, 1H, N8'SO<sub>2</sub>CH<sub>b</sub>), 3.07 (app-td,  $J = 11.7, 7.3$  Hz, 1H, C2'H<sub>b</sub>), 3.03–2.95 (m, 1H, C3'H<sub>a</sub>\*), 2.92 (s, 3H, N8CH<sub>3</sub>), 2.88–2.74 (m, 3H, C10H, C3'H<sub>a</sub>, C2''H<sub>a</sub>), 2.87 (s, 3H, N8CH<sub>3</sub>\*), 2.56–2.43 (m, 2H, C3H<sub>a</sub>, C2''H<sub>b</sub>), 2.36–2.24 (m, 1H, C3H<sub>b</sub>), 2.19–2.07 (m, 1H, C3'H<sub>b</sub>\*), 1.94 (app-dd,  $J = 13.1, 7.2$  Hz, 1H, C3'H<sub>b</sub>), 1.61–1.39 (m, 7H, C12/13H<sub>3</sub>, C4''H<sub>2</sub>, C5''H<sub>2</sub>), 1.38 (s, 3H, C12/13H<sub>3</sub>), 1.36 (s, 3H, C12/13H<sub>3</sub>\*), 1.30–1.13 (m, 2H, N8'SO<sub>2</sub>CH<sub>2</sub>CH<sub>2</sub>),



0.95 (t,  $J = 6.9$  Hz, 3H, C6''H<sub>3</sub>), 0.92 (t,  $J = 6.9$  Hz, 3H, C6''H<sub>3</sub>\*), 0.11 (s, 9H, Si(CH<sub>3</sub>)<sub>3</sub>\*), 0.07 (s, 9H, Si(CH<sub>3</sub>)<sub>3</sub>).

<sup>13</sup>C NMR (125.8 MHz, CDCl<sub>3</sub>, 25 °C, 5.4:1 mixture of atropisomers, \*denotes minor atropisomer): δ 173.8 (C1''), 173.2 (C1''\*), 149.9 (C7a), 149.5 (C7a\*), 138.9 (C4a''), 138.0 (C4a'), 136.6 (C4), 136.1 (C7a'), 136.0 (C7a''), 131.1 (C4a), 129.5 (C6), 129.3 (C6\*), 128.0 (C6'), 127.8 (C5''), 126.4 (C5'), 125.5 (C7''), 124.9 (C7'), 124.1 (C4''), 123.9 (C4'), 114.6 (C5''), 113.8 (C5), 102.7 (C7), 102.4 (C7\*), 85.2 (C8a\*), 84.7 (C8a), 79.5 (C8a'), 78.2 (C8a''), 69.0 (C3''), 67.6 (C3''\*), 65.3 (C2, C9, C9\*), 64.0 (C10), 60.5 (C11), 60.1 (C11''), 54.1 (C2, C3a, C3a\*), 52.6 (C3a'), 51.9 (N8'SO<sub>2</sub>CH<sub>2</sub>), 50.1 (C3a''), 45.2 (C2''), 44.1 (C2'), 42.1 (C2''), 41.3 (C2''\*), 39.5 (C4''), 38.7 (C4''\*), 37.5 (C3), 36.3 (C2), 33.2 (C3''), 31.5 (C3'), 31.0 (N8CH<sub>3</sub>\*), 30.9 (N8CH<sub>3</sub>), 25.0 (C12/13), 24.8 (C12/13\*), 20.6 (C12/13\*), 20.5 (C12/13), 19.1 (C5''), 18.9 (C5''\*), 14.3 (C6''), 14.2 (C6''\*), 10.8 (N8'SO<sub>2</sub>CH<sub>2</sub>CH<sub>2</sub>\*), 10.7 (N8'SO<sub>2</sub>CH<sub>2</sub>CH<sub>2</sub>), -1.7 (Si(CH<sub>3</sub>)<sub>3</sub>\*), -1.8 (Si(CH<sub>3</sub>)<sub>3</sub>).

FTIR (thin film) cm<sup>-1</sup>:

3474 (br-w), 2956 (s), 1636 (s), 1600 (s), 1489 (m), 1457 (m), 1338 (s), 1251 (m), 1157 (s), 1053 (m), 860 (m), 739 (m).

HRMS (ESI) ( $m/z$ ):

calc'd for C<sub>37</sub>H<sub>53</sub>N<sub>4</sub>O<sub>5</sub>SSi [M+H]<sup>+</sup>: 693.3500,  
found: 693.3482

[α]<sub>D</sub><sup>27</sup>:

-111 ( $c = 0.27$ , CH<sub>2</sub>Cl<sub>2</sub>).

TLC (30% acetone in hexanes), R<sub>f</sub>:

0.25 (UV, CAM).

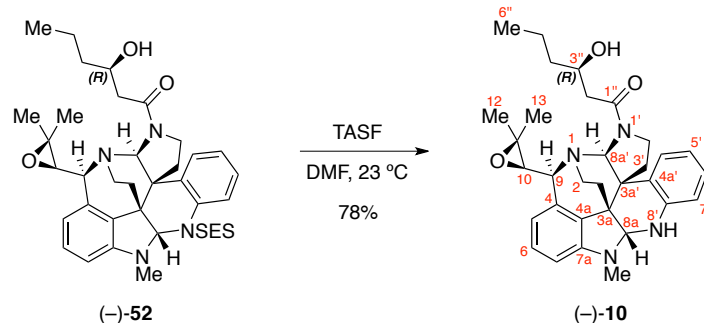

**(-)-Communesin I (10):**<sup>72</sup>

A solution of tris(dimethylamino)sulfonium difluorotrimethylsilicate (TASF, 8.3 mg, 0.030 mmol, 4.0 equiv) in *N,N*-dimethylformamide (50  $\mu\text{L}$ ) was added to a solution of (-)-*N*8'-(trimethylsilyl)-ethanesulfonyl communesin I (**52**, 5.2 mg, 7.5  $\mu\text{mol}$ , 1 equiv) in *N,N*-dimethylformamide (200  $\mu\text{L}$ ) at 23  $^\circ\text{C}$ . After 2 h, a saturated aqueous sodium chloride solution (5 mL) and deionized water (3 mL) were added and the mixture was extracted with ethyl acetate (3  $\times$  5 mL). The combined organic extracts were washed with a saturated aqueous sodium chloride solution (2  $\times$  8 mL), were dried over anhydrous sodium sulfate, were filtered, and were concentrated under reduced pressure. The resulting residue was purified by flash column chromatography on silica gel (eluent: 50% $\rightarrow$ 60% ethyl acetate in dichloromethane) to afford (-)-communesin I (**10**, 3.11 mg, 78.4%) as a colorless film. Structural assignments were made using additional information from gCOSY, gHSQC, gHMBC, and 1D selective NOESY experiments.

<sup>1</sup>H NMR (600 MHz,  $\text{CDCl}_3$ , 25  $^\circ\text{C}$ , 11:1 mixture of atropisomers, \*denotes minor atropisomer):

$\delta$  7.01 (app-td,  $J = 7.6, 1.4$  Hz, 2H, C6'H, C6'H\*), 6.88 (t,  $J = 7.7$  Hz, 1H, C6H), 6.85 (t,  $J = 8.2$  Hz, 1H, C6H\*), 6.72 (t,  $J = 7.4$  Hz, 2H, C5'H, C5'H\*), 6.69 (d,  $J = 7.7$  Hz, 2H, C7'H, C7'H\*), 6.68 (d,  $J = 6.7$  Hz, 1H, C4'H), 6.58 (d,  $J = 7.5$  Hz, 1H, C4'H\*), 6.09 (d,  $J = 7.6$  Hz, 1H, C5H\*), 6.06 (d,  $J = 7.6$  Hz, 1H, C5H), 5.95 (d,  $J = 7.7$  Hz, 1H, C7H), 5.91 (d,  $J = 7.9$  Hz, 1H, C7H\*), 5.41 (app-s, 1H, C8a'H\*), 5.05 (d,  $J = 1.5$  Hz, 1H, C8a'H), 4.70 (s, 1H, C8aH), 4.67 (s, 1H, C8aH\*), 4.59 (br-s, 1H, N8'H), 4.47 (d,  $J = 9.1$  Hz, 1H, C9H\*), 4.20–4.15 (m, 1H, C3''H\*), 4.14 (d,  $J = 5.9$  Hz, 1H, C3''OH), 4.11 (d,  $J = 9.3$  Hz, 1H, C9H), 4.09–4.02 (m, 1H, C3''H), 3.92 (app-dd,  $J = 12.0, 8.4$  Hz, 1H, C2'H<sub>a</sub>), 3.64 (app-t,  $J = 9.1$  Hz, 1H, C2'H<sub>a</sub>\*), 3.55 (app-dd,  $J = 16.1, 8.9$  Hz, 1H, C2'H<sub>a</sub>\*), 3.46 (app-dd,  $J = 15.9, 9.6$  Hz, 1H, C2H<sub>a</sub>), 3.41–3.30 (m, 2H, C2H<sub>b</sub>, C2H<sub>b</sub>\*), 3.13–3.06 (m, 1H, C2'H<sub>b</sub>\*), 3.00 (app-td,  $J = 11.8, 7.2$  Hz, 1H, C2'H<sub>b</sub>), 2.97–2.89 (m, 1H, C3'H<sub>a</sub>\*), 2.87 (d,  $J = 9.1$  Hz, 1H, C10H), 2.86–2.81 (m, 7H, N8CH<sub>3</sub>, N8CH<sub>3</sub>\*, C2''H<sub>a</sub>), 2.80 (d,  $J = 9.1$  Hz, 1H, C10H\*), 2.71 (app-td,  $J = 12.4, 8.6$  Hz, 1H, C3'H<sub>a</sub>), 2.49 (app-dd,  $J = 14.5, 3.6$  Hz, 1H, C2''H<sub>b</sub>), 2.37 (app-dd,  $J = 13.1, 6.9$  Hz, 2H, C3H<sub>a</sub>, C3H<sub>a</sub>\*), 2.29 (app-dt,  $J = 13.0, 9.3$  Hz, 2H, C3H<sub>b</sub>, C3H<sub>b</sub>\*), 2.08–2.03 (m, 1H, C3'H<sub>b</sub>\*), 2.00 (app-dd,  $J = 13.3, 6.9$  Hz, 1H, C3'H<sub>b</sub>), 1.64–1.50 (m, 9H, C13H<sub>3</sub>,

72. The structure of (-)-communesin I (**10**) with our revised C3''-configuration is depicted.

C13H<sub>3</sub>\*, C4''H<sub>2</sub>, C5''H<sub>a</sub>), 1.49–1.40 (m, 1H, C5''H<sub>b</sub>), 1.39 (s, 3H, C12H<sub>3</sub>), 1.37 (s, 3H, C12H<sub>3</sub>\*), 0.96 (t, *J* = 7.1 Hz, 3H, C6''H<sub>3</sub>), 0.93 (t, *J* = 7.2 Hz, 3H, C6''H<sub>3</sub>\*).

<sup>13</sup>C NMR (150.9 MHz, CDCl<sub>3</sub>, 25 °C, 11:1 mixture of atropisomers, \*denotes minor atropisomer): δ 174.1 (C1''), 150.7 (C7a), 142.8 (C7a'), 136.3 (C4), 132.3 (C4a), 132.2 (C4a'), 129.1 (C6), 128.9 (C6\*), 127.7 (C6'), 127.5 (C6'\*), 123.4 (C4'\*), 123.3 (C4'), 121.2 (C5'\*), 120.7 (C5'), 117.3 (C7'\*), 117.2 (C7'), 113.3 (C5), 102.0 (C7), 101.6 (C7\*), 83.0 (C8a\*), 82.6 (C8a), 79.3 (C8a'), 77.9 (C8a'\*), 69.2 (C3''), 67.6 (C3''\*), 65.4 (C9), 65.2 (C9\*), 64.2 (2C, C10, C10\*), 60.5 (C11), 52.2 (C3a'), 51.5 (C3a), 45.3 (C2'\*), 44.2 (C2'), 42.2 (C2''), 39.6 (C4''), 37.9 (C3), 36.2 (C2), 32.5 (C3'\*), 30.8 (C3'), 29.8 (N8CH<sub>3</sub>\*), 29.7 (N8CH<sub>3</sub>), 25.0 (C12), 24.9 (C12\*), 20.6 (C13\*), 20.5 (C13), 19.1 (C5''), 14.3 (C6''), 14.2 (C6''\*).

FTIR (thin film) cm<sup>-1</sup>: 3460 (br-w), 3325 (br-w), 3052 (w), 2957 (m), 2927 (m), 2872 (m), 1625 (s), 1606 (s), 1596 (s), 1493 (s), 1428 (s), 1338 (m), 1279 (m), 1002 (m), 908 (m), 737 (s).

HRMS (ESI) (*m/z*): calc'd for C<sub>32</sub>H<sub>41</sub>N<sub>4</sub>O<sub>3</sub> [M+H]<sup>+</sup>: 529.3173, found: 529.3167.

[α]<sub>D</sub><sup>23</sup>: -137 (*c* = 0.22, MeOH).<sup>73</sup>

TLC (50% ethyl acetate in dichloromethane), R<sub>f</sub>: 0.19 (UV, CAM).

---

73. Literature value: [α]<sub>D</sub><sup>20</sup> = -59 (*c* = 0.1, MeOH), see Fan, Y.-Q.; Li, P.-H.; Chao, Y.-X.; Chen, H.; Du, N.; He, Q.-X.; Liu, K.-C. *Mar. Drugs*. **2015**, *13*, 6489.

**Table S14. Comparison of our <sup>1</sup>H NMR data for (–)-communesin I (10) with literature data (CDCl<sub>3</sub>, major atropisomer):**

| Assignment        | Chen's Isolation Report <sup>74</sup><br>(–)-Communesin I (10)<br><sup>1</sup> H NMR, 600 MHz, CDCl <sub>3</sub> | This Work<br>(–)-Communesin I (10)<br><sup>1</sup> H NMR, 600 MHz, CDCl <sub>3</sub>     |
|-------------------|------------------------------------------------------------------------------------------------------------------|------------------------------------------------------------------------------------------|
| C2                | 3.46 (dd, <i>J</i> = 15.8, 9.5 Hz, 1H)<br>3.36 (dt, <i>J</i> = 15.8, 8.5 Hz, 1H)                                 | 3.46 (app-dd, <i>J</i> = 15.9, 9.6 Hz, 1H)<br>3.41–3.30 (m, 2H)                          |
| C3                | 2.37 (dd, <i>J</i> = 12.8, 8.5 Hz, 1H)<br>2.28 (dt, <i>J</i> = 12.8, 9.5 Hz, 1H)                                 | 2.37 (app-dd, <i>J</i> = 13.1, 6.9 Hz, 2H)<br>2.29 (app-dt, <i>J</i> = 13.0, 9.3 Hz, 2H) |
| C3a               | –                                                                                                                | –                                                                                        |
| C4a               | –                                                                                                                | –                                                                                        |
| C4                | –                                                                                                                | –                                                                                        |
| C5                | 6.05 (d, <i>J</i> = 7.7 Hz, 1H)                                                                                  | 6.06 (d, <i>J</i> = 7.6 Hz, 1H)                                                          |
| C6                | 6.88 (t, <i>J</i> = 7.7 Hz, 1H)                                                                                  | 6.88 (t, <i>J</i> = 7.7 Hz, 1H)                                                          |
| C7                | 5.95 (d, <i>J</i> = 7.7 Hz, 1H)                                                                                  | 5.95 (d, <i>J</i> = 7.7 Hz, 1H)                                                          |
| C7a               | –                                                                                                                | –                                                                                        |
| N8CH <sub>3</sub> | 2.84 (s, 3H)                                                                                                     | 2.86–2.81 (m, 7H)                                                                        |
| C8a               | 4.70 (s, 1H)                                                                                                     | 4.70 (s, 1H)                                                                             |
| C9                | 4.11 (d, <i>J</i> = 9.0 Hz, 1H)                                                                                  | 4.11 (d, <i>J</i> = 9.3 Hz, 1H)                                                          |
| C10               | 2.87 (d, <i>J</i> = 9.0 Hz, 1H)                                                                                  | 2.87 (d, <i>J</i> = 9.1 Hz, 1H)                                                          |
| C11               | –                                                                                                                | –                                                                                        |
| C12               | 1.39 (s, 3H)                                                                                                     | 1.39 (s, 3H)                                                                             |
| C13               | 1.57 (s, 3H)                                                                                                     | 1.64–1.50 (m, 9H)                                                                        |
| C2'               | 3.92 (dd, <i>J</i> = 12.2, 8.7 Hz, 1H)<br>3.00 (dt, <i>J</i> = 12.2, 7.1 Hz, 1H)                                 | 3.92 (app-dd, <i>J</i> = 12.0, 8.4 Hz, 1H)<br>3.00 (app-td, <i>J</i> = 11.8, 7.2 Hz, 1H) |
| C3'               | 2.71 (dt, <i>J</i> = 12.2, 8.7 Hz, 1H)<br>2.00 (dd, <i>J</i> = 12.2, 7.1 Hz, 1H)                                 | 2.71 (app-td, <i>J</i> = 12.4, 8.6 Hz, 1H)<br>2.00 (app-dd, <i>J</i> = 13.3, 6.9 Hz, 1H) |
| C3a'              | –                                                                                                                | –                                                                                        |
| C4a'              | –                                                                                                                | –                                                                                        |
| C4'               | 6.68 (d, <i>J</i> = 7.6 Hz, 1H)                                                                                  | 6.68 (d, <i>J</i> = 6.7 Hz, 1H)                                                          |
| C5'               | 6.71 (t, <i>J</i> = 7.6 Hz, 1H)                                                                                  | 6.72 (t, <i>J</i> = 7.4 Hz, 2H)                                                          |
| C6'               | 7.01 (t, <i>J</i> = 7.6 Hz, 1H)                                                                                  | 7.01 (app-td, <i>J</i> = 7.6, 1.4 Hz, 1H)                                                |
| C7'               | 6.69 (d, <i>J</i> = 7.6 Hz, 1H)                                                                                  | 6.69 (d, <i>J</i> = 7.7 Hz, 2H)                                                          |
| C7a'              | –                                                                                                                | –                                                                                        |
| C8a'              | 5.05 (s, 1H)                                                                                                     | 5.05 (d, <i>J</i> = 1.5 Hz, 1H)                                                          |
| C1''              | –                                                                                                                | –                                                                                        |
| C2''              | 2.82 (dd, <i>J</i> = 14.6, 3.4 Hz, 1H)<br>2.48 (dd, <i>J</i> = 14.6, 3.4 Hz, 1H)                                 | 2.86–2.81 (m, 7H)<br>2.49 (dd, <i>J</i> = 14.5, 3.6 Hz, 1H)                              |
| C3''              | 4.06 (br-s, 1H)                                                                                                  | 4.09–4.02 (m, 1H)                                                                        |
| C3''OH            | 4.14 (br-s, 1H)                                                                                                  | 4.14 (d, <i>J</i> = 5.9 Hz, 1H)                                                          |
| C4''              | 1.60 (m, 1H), 1.53 (m, 1H)                                                                                       | 1.64–1.50 (m, 9H)                                                                        |
| C5''              | 1.54 (m, 1H), 1.44 (m, 1H)                                                                                       | 1.64–1.50 (m, 9H), 1.49–1.40 (m, 1H)                                                     |
| C6''              | 0.96 (t, <i>J</i> = 7.0 Hz, 3H)                                                                                  | 0.96 (t, <i>J</i> = 7.1 Hz, 3H)                                                          |
| N8'H              | –                                                                                                                | 4.59 (br-s, 1H)                                                                          |

74. Fan, Y.-Q.; Li, P.-H.; Chao, Y.-X.; Chen, H.; Du, N.; He, Q.-X.; Liu, K.-C. *Mar. Drugs*. **2015**, *13*, 6489.

**Table S15. Comparison of our <sup>13</sup>C NMR data for (–)-communesin I (10) with literature data (CDCl<sub>3</sub>, major atropisomer):**

| Assignment        | Chen's Isolation Report <sup>74</sup><br>(–)-Communesin I (10)<br><sup>13</sup> C NMR, 150 MHz CDCl <sub>3</sub> | This Work<br>(–)-Communesin I (10)<br><sup>13</sup> C NMR, 150.9 MHz, CDCl <sub>3</sub> | Chemical Shift Difference<br>$\Delta\delta = \delta$ (this work) –<br>$\delta$ (Chen report) |
|-------------------|------------------------------------------------------------------------------------------------------------------|-----------------------------------------------------------------------------------------|----------------------------------------------------------------------------------------------|
| C2                | 36.1                                                                                                             | 36.2                                                                                    | 0.1                                                                                          |
| C3                | 37.7                                                                                                             | 37.9                                                                                    | 0.2                                                                                          |
| C3a               | 51.3                                                                                                             | 51.5                                                                                    | 0.2                                                                                          |
| C4a               | 132.1                                                                                                            | 132.3                                                                                   | 0.2                                                                                          |
| C4                | 136.1                                                                                                            | 136.3                                                                                   | 0.2                                                                                          |
| C5                | 113.1                                                                                                            | 113.3                                                                                   | 0.2                                                                                          |
| C6                | 129.0                                                                                                            | 129.1                                                                                   | 0.1                                                                                          |
| C7                | 101.9                                                                                                            | 102.0                                                                                   | 0.1                                                                                          |
| C7a               | 150.5                                                                                                            | 150.7                                                                                   | 0.2                                                                                          |
| N8CH <sub>3</sub> | 29.6                                                                                                             | 29.7                                                                                    | 0.1                                                                                          |
| C8a               | 82.4                                                                                                             | 82.6                                                                                    | 0.2                                                                                          |
| C9                | 65.2                                                                                                             | 65.4                                                                                    | 0.2                                                                                          |
| C10               | 64.1                                                                                                             | 64.2                                                                                    | 0.1                                                                                          |
| C11               | 60.4                                                                                                             | 60.5                                                                                    | 0.1                                                                                          |
| C12               | 24.9                                                                                                             | 25.0                                                                                    | 0.1                                                                                          |
| C13               | 20.3                                                                                                             | 20.5                                                                                    | 0.2                                                                                          |
| C2'               | 44.1                                                                                                             | 44.2                                                                                    | 0.1                                                                                          |
| C3'               | 30.6                                                                                                             | 30.8                                                                                    | 0.2                                                                                          |
| C3a'              | 52.1                                                                                                             | 52.2                                                                                    | 0.1                                                                                          |
| C4a'              | 132.1                                                                                                            | 132.3                                                                                   | 0.2                                                                                          |
| C4'               | 123.2                                                                                                            | 123.3                                                                                   | 0.1                                                                                          |
| C5'               | 120.6                                                                                                            | 120.7                                                                                   | 0.1                                                                                          |
| C6'               | 127.5                                                                                                            | 127.7                                                                                   | 0.2                                                                                          |
| C7'               | 117.0                                                                                                            | 117.2                                                                                   | 0.2                                                                                          |
| C7a'              | 142.6                                                                                                            | 142.8                                                                                   | 0.2                                                                                          |
| C8a'              | 79.1                                                                                                             | 79.3                                                                                    | 0.2                                                                                          |
| C1''              | 173.9                                                                                                            | 174.1                                                                                   | 0.2                                                                                          |
| C2''              | 42.1                                                                                                             | 42.2                                                                                    | 0.1                                                                                          |
| C3''              | 69.0                                                                                                             | 69.2                                                                                    | 0.2                                                                                          |
| C4''              | 39.5                                                                                                             | 39.6                                                                                    | 0.1                                                                                          |
| C5''              | 18.9                                                                                                             | 19.1                                                                                    | 0.2                                                                                          |
| C6''              | 14.1                                                                                                             | 14.3                                                                                    | 0.2                                                                                          |

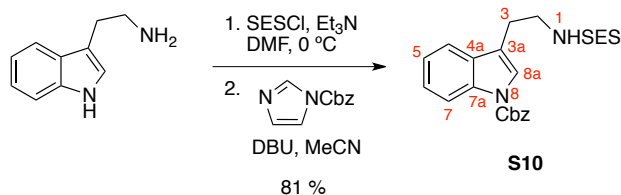

### **Tryptamine S10:**

2-(Trimethylsilyl)ethanesulfonyl chloride (455  $\mu$ L, 2.40 mmol, 1.20 equiv) was added dropwise via syringe over 15 min to a solution of tryptamine (320 mg, 2.00 mmol, 1 equiv) and triethylamine (1.00 mL, 7.20 mmol, 3.60 equiv) in *N,N*-dimethylformamide (4.00 mL) at 0  $^{\circ}$ C. After 30 min, the suspension was diluted with a saturated aqueous ammonium sulfate solution (45 mL) and deionized water (15 mL). After warming to 23  $^{\circ}$ C, the mixture was extracted with diethyl ether (3  $\times$  40 mL) and the combined organic extracts were washed successively with an aqueous hydrogen chloride solution (1 N, 80 mL) and a saturated aqueous sodium chloride solution (80 mL), were dried over anhydrous sodium sulfate, were filtered, and were concentrated under reduced pressure. The resulting residue was dissolved in acetonitrile (6.00 mL) and samples of benzyl 1*H*-imidazole-1-carboxylate<sup>75</sup> (445 mg, 2.20 mmol, 1.10 equiv) and 1,8-diazabicyclo[5.4.0]undec-7-ene (DBU, 75.0  $\mu$ L, 0.500 mmol, 0.250 equiv) were then added. After stirring for 21 h at 23  $^{\circ}$ C, the pale-beige solution was diluted with an aqueous hydrogen chloride solution (1 N, 10 mL) and deionized water (40 mL). The mixture was extracted with ethyl acetate (3  $\times$  50 mL) and the combined organic extracts were washed with a saturated aqueous sodium chloride solution (100 mL), were dried over anhydrous sodium sulfate, were filtered, and were concentrated under reduced pressure. The resulting residue was purified by flash column chromatography on silica gel (eluent: 20% $\rightarrow$ 25% ethyl acetate in hexanes) to afford tryptamine **S10** (747 mg, 81.5% over two steps) as white solid. Structural assignments were made using information from gCOSY, gHSQC, and gHMBC experiments.

$^1$ H NMR (500 MHz,  $\text{CDCl}_3$ , 21  $^{\circ}$ C):

$\delta$  8.19 (br-s, 1H, C7H), 7.55 (d,  $J$  = 7.6 Hz, 1H, C4H), 7.53–7.47 (m, 3H, C8aH, Ar<sub>Cbz-*o*</sub>-H), 7.45–7.37 (m, 3H, Ar<sub>Cbz-*m*</sub>-H, Ar<sub>Cbz-*p*</sub>-H), 7.34 (app-t,  $J$  = 7.6 Hz, 1H, C6H), 7.27 (app-t,  $J$  = 7.1 Hz, 1H, C5H), 5.43 (s, 2H, N8CO<sub>2</sub>CH<sub>2</sub>Ph), 4.66 (t,  $J$  = 6.3 Hz, 1H, N8HCO<sub>2</sub>CH<sub>2</sub>Ph), 3.43 (app-q,  $J$  = 6.9 Hz, 2H, C2H<sub>2</sub>), 2.97 (t,  $J$  = 7.1 Hz, 2H, C3H<sub>2</sub>), 2.89–2.83 (m, 2H, N1HSO<sub>2</sub>CH<sub>2</sub>), 0.99–0.83 (m, 2H, N1HSO<sub>2</sub>CH<sub>2</sub>CH<sub>2</sub>), –0.01 (s, 9H, Si(CH<sub>3</sub>)<sub>3</sub>).

$^{13}$ C NMR (125.8 MHz,  $\text{CDCl}_3$ , 21  $^{\circ}$ C):

$\delta$  150.7 (N8CO<sub>2</sub>CH<sub>2</sub>Ph), 135.7 (C7a), 135.1 (Ar<sub>Cbz-*ipso*</sub>-C), 130.0 (C4a), 128.8 (2C, Ar<sub>Cbz-*m*</sub>-C, Ar<sub>Cbz-*p*</sub>-C), 128.6 (Ar<sub>Cbz-*o*</sub>-C), 125.1 (C6), 123.3 (C8a), 123.1 (C5), 118.9 (C4), 117.7 (C3a), 115.5 (C7), 68.8 (N8CO<sub>2</sub>CH<sub>2</sub>Ph), 48.8 (N1SO<sub>2</sub>CH<sub>2</sub>), 42.8 (C2), 26.4 (C3), 10.5 (N1SO<sub>2</sub>CH<sub>2</sub>CH<sub>2</sub>), –2.0 (Si(CH<sub>3</sub>)<sub>3</sub>).

FTIR (thin film)  $\text{cm}^{-1}$ :

3239 (w), 2955 (w), 1739 (s), 1454 (m), 1394 (s), 1355 (s), 1317 (m), 1249 (s), 1212 (m), 860 (m), 742 (s).

HRMS (DART) ( $m/z$ ):

calc'd for C<sub>23</sub>H<sub>31</sub>N<sub>2</sub>O<sub>4</sub>SSi [M+H]<sup>+</sup>: 459.1768,  
 found: 459.1766.

TLC (20% ethyl acetate in hexanes), R<sub>f</sub>:

0.20 (UV, CAM).

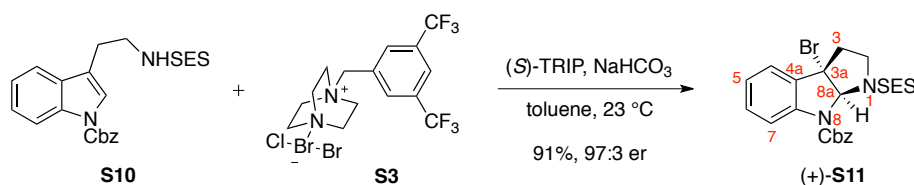

### **Bromocyclotryptamine (+)-S11:**

A sample of bromine salt **S3**<sup>8</sup> (437 mg, 817  $\mu\text{mol}$ , 1.30 equiv) was added to a suspension of tryptamine **S10** (288 mg, 628  $\mu\text{mol}$ , 1 equiv), (*S*)-3,3'-bis(2,4,6-triisopropyl-phenyl)-1,1'-binaphthyl-2,2'-diyl hydrogenphosphate ((*S*)-TRIP, 47.3 mg, 62.8  $\mu\text{mol}$ , 0.100 equiv), and crushed sodium hydrogen carbonate (211 mg, 2.51 mmol, 4.00 equiv) in toluene (12.6 mL) at 23  $^\circ\text{C}$ . After stirring for 23 h, the orange suspension was diluted with an aqueous sodium thiosulfate solution (1M, 50 mL) and was stirred vigorously for 5 min. The mixture was extracted with ethyl acetate (3  $\times$  25 mL). The combined organic extracts were washed successively with an aqueous sodium thiosulfate solution (1 M, 75 mL) and a saturated aqueous sodium chloride solution (75 mL), were dried over anhydrous sodium sulfate, were filtered, and were concentrated under reduced pressure. The residue was purified by flash column chromatography on silica gel (eluent: 10% ethyl acetate in hexanes) to afford bromocyclotryptamine (+)-**S11** (307 mg, 90.9%, 97:3 er) as a sticky white foam.<sup>10</sup> The enantiomeric ratio was determined by chiral HPLC analysis (CHIRALPAK<sup>®</sup> IA, 15% *i*PrOH in hexanes, 1.0 mL/min, 220 nm,  $t_R$  (major) = 7.0 min,  $t_R$  (minor) = 9.3 min). As a result of the slow conformational equilibration at ambient temperature, NMR spectra were collected at elevated temperature. Structural assignments were made using additional information from gCOSY, gHSQC, and gHMBC experiments also collected at elevated temperature.

|                                                                            |                                                                                                                                                                                                                                                                                                                                                                                                                                                                                                                                                                                                                                                                                                                                                                                                                              |
|----------------------------------------------------------------------------|------------------------------------------------------------------------------------------------------------------------------------------------------------------------------------------------------------------------------------------------------------------------------------------------------------------------------------------------------------------------------------------------------------------------------------------------------------------------------------------------------------------------------------------------------------------------------------------------------------------------------------------------------------------------------------------------------------------------------------------------------------------------------------------------------------------------------|
| <sup>1</sup> H NMR (500 MHz, CD <sub>3</sub> CN, 60 $^\circ\text{C}$ ):    | $\delta$ 7.69 (d, $J$ = 8.2 Hz, 1H, C7H), 7.54–7.48 (m, 3H, C4H, Ar <sub>Cbz-<i>o</i></sub> -H), 7.45–7.39 (m, 2H, Ar <sub>Cbz-<i>m</i></sub> -H), 7.39–7.32 (m, 2H, C6H, Ar <sub>Cbz-<i>p</i></sub> -H), 7.19 (t, $J$ = 7.6 Hz, 1H, C5H), 6.47 (s, 1H, C8aH), 5.41 (d, $J$ = 12.2 Hz, 1H, N8CO <sub>2</sub> CH <sub>a</sub> Ph), 5.29 (d, $J$ = 12.2 Hz, 1H, N8CO <sub>2</sub> CH <sub>b</sub> Ph), 3.86 (app-dd, $J$ = 10.8, 7.2 Hz, 1H, C2H <sub>a</sub> ), 3.14–2.99 (m, 2H, N1SO <sub>2</sub> CH <sub>2</sub> ), 2.93 (app-dd, $J$ = 11.9, 4.3 Hz, 1H, C3H <sub>a</sub> ), 2.85 (app-td, $J$ = 10.9, 4.1 Hz, 1H, C2H <sub>b</sub> ), 2.76 (app-td, $J$ = 11.9, 7.5 Hz, 1H, C3H <sub>b</sub> ), 1.01–0.78 (m, 2H, N1SO <sub>2</sub> CH <sub>2</sub> CH <sub>2</sub> ), 0.01 (s, 9H, Si(CH <sub>3</sub> ) <sub>3</sub> ). |
| <sup>13</sup> C NMR (125.8 MHz, CD <sub>3</sub> CN, 60 $^\circ\text{C}$ ): | $\delta$ 154.2 (N8CO <sub>2</sub> CH <sub>2</sub> Ph), 142.2 (C7a), 137.2 (Ar <sub>Cbz-<i>ipso</i></sub> -C), 133.7 (C4a), 132.1 (C6), 129.9 (Ar <sub>Cbz-<i>m</i></sub> -C), 129.7 (2C, Ar <sub>Cbz-<i>o</i></sub> -C, Ar <sub>Cbz-<i>p</i></sub> -C), 126.1 (C5), 126.0 (C4), 117.6 (C7), 87.7 (C8a), 69.4 (N8CO <sub>2</sub> CH <sub>2</sub> Ph), 64.6 (C3a), 51.1 (N1SO <sub>2</sub> CH <sub>2</sub> ), 50.1 (C2), 44.7 (C3), 11.3 (N1SO <sub>2</sub> CH <sub>2</sub> CH <sub>2</sub> ), -1.5 (Si(CH <sub>3</sub> ) <sub>3</sub> ).                                                                                                                                                                                                                                                                                      |
| FTIR (thin film) cm <sup>-1</sup> :                                        | 2952 (w), 2896 (w), 1710 (s), 1481 (s), 1395 (s), 1326 (s), 1249 (s), 1140 (s), 1040 (m), 832 (s).                                                                                                                                                                                                                                                                                                                                                                                                                                                                                                                                                                                                                                                                                                                           |
| HRMS (DART) ( $m/z$ ):                                                     | calc'd for C <sub>23</sub> H <sub>30</sub> BrN <sub>2</sub> O <sub>4</sub> SSi [M+H] <sup>+</sup> : 537.0873, found: 537.0872.                                                                                                                                                                                                                                                                                                                                                                                                                                                                                                                                                                                                                                                                                               |
| [ $\alpha$ ] <sub>D</sub> <sup>22</sup> :                                  | +77 ( $c$ = 1.43, CH <sub>2</sub> Cl <sub>2</sub> ).                                                                                                                                                                                                                                                                                                                                                                                                                                                                                                                                                                                                                                                                                                                                                                         |
| TLC (10% ethyl acetate in hexanes), R <sub>f</sub> :                       | 0.25 (UV, CAM).                                                                                                                                                                                                                                                                                                                                                                                                                                                                                                                                                                                                                                                                                                                                                                                                              |

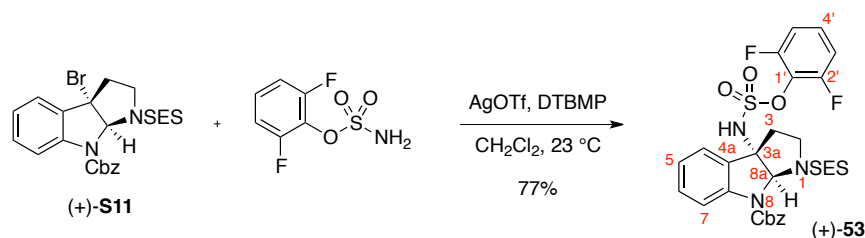

### Sulfamate ester (+)-53:

A sample of silver trifluoromethanesulfonate (278 mg, 1.08 mmol, 2.00 equiv) was added to a solution of bromocyclotryptamine (+)-**S11** (291 mg, 0.542 mmol, 1 equiv), 2,6-difluorophenyl sulfamate<sup>11</sup> (227 mg, 1.08 mmol, 2.00 equiv), and 2,6-di-*tert*-butyl-4-methylpyridine (DTBMP, 278 mg, 1.35 mmol, 2.50 equiv) in dichloromethane (13.6 mL) at 23 °C in the dark. After 1.5 h, the milky beige suspension was diluted with ethyl acetate (27 mL) and was filtered through a pad of pad of Celite. The filter cake was washed with ethyl acetate (136 mL) and the colorless filtrate was concentrated under reduced pressure. The residue was purified by flash column chromatography on silica gel (eluent: 40%→50% diethyl ether in hexanes) to afford sulfamate ester (+)-**53** (278 mg, 77.0%) as a white foam. As a result of the slow conformational equilibration at ambient temperature, NMR spectra were collected at elevated temperature. Structural assignments were made using additional information from gCOSY, gHSQC, and gHMBC experiments also collected at elevated temperature.

<sup>1</sup>H NMR (400 MHz, CD<sub>3</sub>CN, 60 °C):

δ 7.73 (br-d, *J* = 8.3 Hz, 1H, C7H), 7.53 (ddd, *J* = 7.7, 1.4, 0.6 Hz, 1H, C4H), 7.48–7.43 (m, 2H, Ar<sub>Cbz</sub>-*o*-H), 7.43–7.38 (m, 1H, C6H), 7.38–7.27 (m, 4H, C4'H, Ar<sub>Cbz</sub>-*m*-H, Ar<sub>Cbz</sub>-*p*-H), 7.18 (app-td, *J* = 7.6, 1.1 Hz, 1H, C5H), 7.13 (br-s, 1H, NHSO<sub>3</sub>Ar), 7.11–7.04 (m, 2H, C3'H), 6.56 (s, 1H, C8aH), 5.37 (d, *J* = 12.3 Hz, 1H, N8CO<sub>2</sub>CH<sub>a</sub>Ph), 5.23 (d, *J* = 12.3 Hz, 1H, N8CO<sub>2</sub>CH<sub>b</sub>Ph), 3.93 (app-dd, *J* = 11.2, 7.5 Hz, 1H, C2H<sub>a</sub>), 3.15–2.94 (m, 2H, N1SO<sub>2</sub>CH<sub>2</sub>), 2.87 (ddd, *J* = 12.2, 11.2, 4.6 Hz, 1H, C2H<sub>b</sub>), 2.72 (app-td, *J* = 12.2, 7.5 Hz, 1H, C3H<sub>a</sub>), 2.54 (app-dd, *J* = 12.2, 4.6 Hz, 1H, C3H<sub>b</sub>), 0.99–0.79 (m, 2H, N1SO<sub>2</sub>CH<sub>2</sub>CH<sub>2</sub>), 0.01 (s, 9H, Si(CH<sub>3</sub>)<sub>3</sub>).

<sup>13</sup>C NMR (100.6 MHz, CD<sub>3</sub>CN, 60 °C):

δ 157.0 (dd, *J* = 252, 3.7 Hz, C2'), 154.1 (N8CO<sub>2</sub>CH<sub>2</sub>Ph), 143.9 (C<sub>7a</sub>), 137.2 (Ar<sub>Cbz</sub>-*ipso*-C), 131.9 (C6), 130.3 (C4a), 129.6 (Ar<sub>Cbz</sub>-*m*-C), 129.4 (t, *J* = 9.5 Hz, C4'), 129.4 (Ar<sub>Cbz</sub>-*p*-C), 129.4 (Ar<sub>Cbz</sub>-*o*-C), 127.6 (t, *J* = 15.8 Hz, C1'), 126.1 (C4), 125.3 (C5), 117.4 (C7), 114.0–113.6 (m, C3'), 82.7 (C8a), 74.0 (C3a), 68.8 (N8CO<sub>2</sub>CH<sub>2</sub>Ph), 50.7 (N1SO<sub>2</sub>CH<sub>2</sub>), 48.7 (C2), 38.8 (C3), 11.1 (N1SO<sub>2</sub>CH<sub>2</sub>CH<sub>2</sub>), –1.8 (Si(CH<sub>3</sub>)<sub>3</sub>).

<sup>19</sup>F NMR (376.4 MHz, CD<sub>3</sub>CN, 25 °C):

δ –126.2 (s, C<sub>6</sub>H<sub>3</sub>F<sub>2</sub>).

FTIR (thin film) cm<sup>-1</sup>:

3210 (br-w), 2952 (w), 2897 (w), 1710 (m), 1605 (m), 1480 (m), 1389 (m), 1324 (m), 1247 (m), 1138 (m), 1010 (s), 859 (s), 832 (s), 744 (s), 522 (s).

HRMS (DART) (*m/z*):

calc'd for C<sub>29</sub>H<sub>34</sub>F<sub>2</sub>N<sub>3</sub>O<sub>7</sub>S<sub>2</sub>Si [M+H]<sup>+</sup>: 666.1570,  
 found: 666.1562.



$[\alpha]_D^{23}$ : +52 ( $c = 0.51$ ,  $\text{CH}_2\text{Cl}_2$ ).

TLC (50% diethyl ether in hexanes),  $R_f$ : 0.20 (UV, CAM).

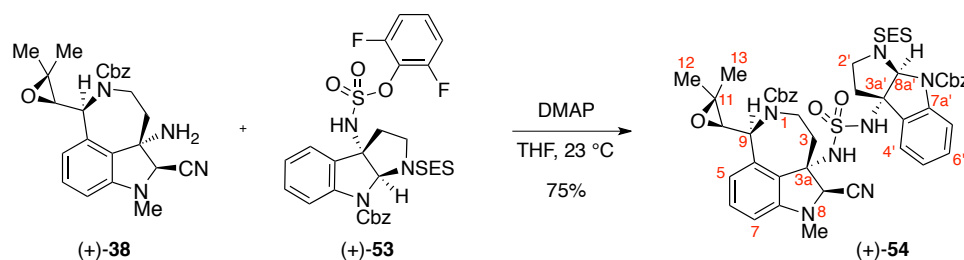

### Sulfamide (+)-54:

A 10-mL round-bottom flask was charged with samples of benzylic aminonitrile (+)-38 (37.0 mg, 85.5  $\mu\text{mol}$ , 1 equiv) and sulfamate ester (+)-53 (102 mg, 154  $\mu\text{mol}$ , 1.80 equiv) and the resulting mixture was azeotropically dried by concentration from anhydrous benzene ( $3 \times 1.5$  mL). The residue was dissolved in tetrahydrofuran (340  $\mu\text{L}$ ) and a sample of 4-(dimethylamino)pyridine (20.9 mg, 171  $\mu\text{mol}$ , 2.00 equiv) was added as a solid at 23  $^{\circ}\text{C}$ . After 23 h, the light-brown solution was diluted with a saturated aqueous ammonium sulfate solution (8 mL) and deionized water (4 mL) and the mixture was extracted with ethyl acetate ( $3 \times 8$  mL). The combined organic extracts were washed with a saturated aqueous sodium chloride solution (20 mL), were dried over anhydrous sodium sulfate, were filtered, and were concentrated under reduced pressure. The residue was purified by flash column chromatography on silica gel (eluent: 30%  $\rightarrow$  40% ethyl acetate in hexanes) to afford sulfamide (+)-54 (62.5 mg, 75.4%) as a white film. As a result of the slow conformational equilibration at ambient temperature, NMR spectra were collected at elevated temperature.

$^1\text{H}$  NMR (400 MHz,  $\text{C}_6\text{D}_6$ , 70  $^{\circ}\text{C}$ ):<sup>76</sup>

$\delta$  7.85 (d,  $J = 8.2$  Hz, 1H), 7.36 (dd,  $J = 7.3, 2.2$  Hz, 3H), 7.26 (d,  $J = 7.6$  Hz, 2H), 7.19–7.15 (m, 3H), 7.15–7.03 (m, 6H), 7.03–6.95 (m, 1H), 6.95–6.78 (m, 2H), 6.45 (br-s, 1H), 6.20 (br-s, 1H), 5.36 (d,  $J = 9.3$  Hz, 1H), 5.29 (d,  $J = 12.3$  Hz, 1H), 5.18 (d,  $J = 12.3$  Hz, 1H), 5.17–5.08 (m, 2H), 5.08–4.88 (br-m, 1H), 4.68 (br-s, 1H), 4.49 (s, 1H), 3.98 (dd,  $J = 11.6, 7.2$  Hz, 1H), 3.56 (dd,  $J = 14.1, 6.3$  Hz, 1H), 3.20 (dd,  $J = 13.3, 4.0$  Hz, 1H), 3.09 (td,  $J = 13.6, 4.4$  Hz, 1H), 2.88 (br-s, 1H), 2.71–2.24 (m, 6H), 2.11 (d,  $J = 8.3$  Hz, 1H), 1.28 (s, 3H), 1.06–0.86 (m, 2H), 0.99 (s, 3H), –0.12 (s, 9H).

$^{13}\text{C}$  NMR (100.6 MHz,  $\text{C}_6\text{D}_6$ , 70  $^{\circ}\text{C}$ ):<sup>77</sup>

$\delta$  157.7 (br), 153.9, 152.0, 143.3, 138.8, 137.2, 136.4, 131.4, 130.6, 128.9, 128.7 (2C), 128.5, 128.2, 127.9, 127.4 (br), 125.5, 124.2, 118.2, 116.6, 115.5, 108.6, 84.1, 73.1, 68.5, 68.3, 67.2, 66.9 (br), 63.4, 59.8, 59.0 (br), 50.8, 47.1, 41.5, 40.5 (br), 33.2 (br), 32.8, 24.3, 19.9, 10.8, –2.0.

FTIR (thin film)  $\text{cm}^{-1}$ :

3253 (br-w), 2955 (w), 2896 (w), 1708 (s), 1600 (m), 1484 (m), 1397 (m), 1327 (s), 1263 (s), 1250 (s), 1141 (s), 838 (m), 750 (m), 698 (m).

HRMS (ESI) ( $m/z$ ):

calc'd for  $\text{C}_{48}\text{H}_{57}\text{N}_7\text{NaO}_9\text{S}_2\text{Si}$  [ $\text{M}+\text{Na}$ ] $^+$ : 990.3321,  
 found: 990.3337.

76. The reported integrals are an approximation due to the presence of multiple conformers and significant atropisomerism.

77. Atropisomerism causes significant signal broadening and not all  $^{13}\text{C}$  resonances were observed. All expected  $^{13}\text{C}$  signals were observed in the heterodimeric product isolated in the next step of our synthesis.

$[\alpha]_{\text{D}}^{23}$ : +86 ( $c = 0.13$ ,  $\text{CH}_2\text{Cl}_2$ ).

TLC (40% ethyl acetate in hexanes),  $R_f$ : 0.33 (UV, CAM).

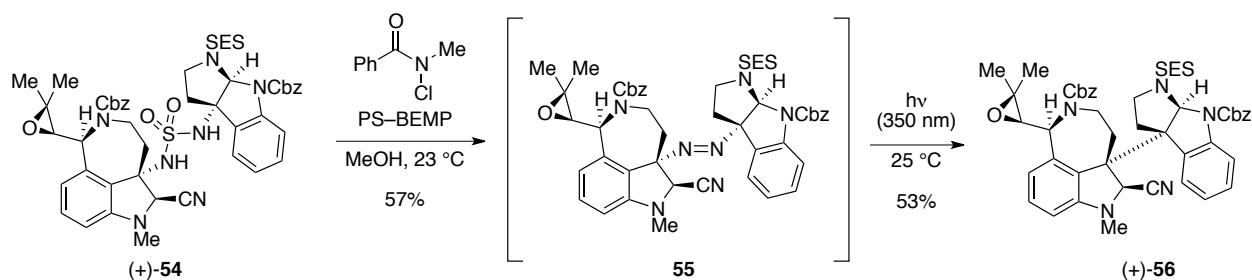

### Heterodimer (+)-56:

*N*-Chloro-*N*-methylbenzamide<sup>31</sup> (63.1 mg, 372  $\mu$ mol, 6.00 equiv) and resin-bound 2-*tert*-butyl-imino-2-diethylamino-1,3-dimethyl-perhydro-1,3,2-diazaphosphorine (PS-BEMP, 340 mg, 2.19 mmol/g on 200-400 mesh polystyrene resin, 744  $\mu$ mol, 12.0 equiv) were added in rapid succession to a solution of sulfamide (+)-54 (60.0 mg, 62.0  $\mu$ mol, 1 equiv) in methanol (6.2 mL) at 23 °C in the dark. After 15 min, the suspension was filtered through a pad of Celite, and the filter cake was washed sequentially with methanol (10 mL), dichloromethane (10 mL), and ethyl acetate (10 mL). The colorless filtrate was concentrated under reduced pressure and the resulting residue was purified by flash column chromatography on silica gel (eluent: 6% ethyl acetate, 47% hexanes, 47% dichloromethane  $\rightarrow$  10% ethyl acetate, 45% hexanes, 45% dichloromethane) to afford diazene **55** (32.0 mg, 57.2%) as a light yellow foam,<sup>78</sup> which was used directly in the next step without further purification.

A solution of diazene **55** (32.0 mg, 35.5  $\mu$ mol, 1 equiv) in dichloromethane (10 mL) was concentrated under reduced pressure in a 100-mL round bottom flask to provide a thin film of the diazene coating the flask. The flask was evacuated and backfilled with argon (three cycles) and was then irradiated in a Rayonet photoreactor equipped with 14 radially distributed ( $r = 12.7$  cm) 25 W lamps ( $\lambda = 350$  nm) at 25 °C. After irradiating for 3 h, the lamps were turned off and the resulting residue was purified by flash column chromatography on silica gel (eluent: 8% ethyl acetate, 46% hexanes, 46% dichloromethane  $\rightarrow$  10% ethyl acetate, 45% hexanes, 45% dichloromethane) to afford heterodimer (+)-**56** (16.4 mg, 52.8%) as a pale-yellow film. As a result of the slow conformational equilibration at ambient temperature, NMR spectra were collected at elevated temperature.

<sup>1</sup>H NMR (400 MHz, CD<sub>3</sub>CN, 70 °C):<sup>76</sup>

$\delta$  7.75 (d,  $J = 8.1$  Hz, 1H), 7.56–7.48 (m, 4H), 7.48–7.35 (m, 7H), 7.34–7.27 (m, 2H), 7.15 (t,  $J = 6.8$  Hz, 1H), 6.64 (dt,  $J = 7.9, 1.0$  Hz, 1H), 6.36 (d,  $J = 7.3$  Hz, 1H), 5.50 (s, 1H), 5.47 (d,  $J = 8.8$  Hz, 1H), 5.36 (d,  $J = 12.1$  Hz, 1H), 5.17 (d,  $J = 12.0$  Hz, 2H), 4.05 (dt,  $J = 14.3, 2.7$  Hz, 1H), 3.68 (s, 1H), 3.40–3.27 (m, 1H), 3.08–2.90 (m, 1H), 2.86 (d,  $J = 8.7$  Hz, 1H), 2.67–2.55 (m, 2H), 2.45 (s, 3H), 2.44–2.33 (m, 1H), 2.04 (dt,  $J = 15.5, 2.2$  Hz, 1H), 1.96 (s, 2H), 1.82 (br-s, 2H), 1.57 (s, 3H), 1.38 (s, 3H), 0.61–0.52 (m, 2H), –0.05 (s, 9H).

<sup>13</sup>C NMR (100.6 MHz, CD<sub>3</sub>CN, 70 °C):

$\delta$  156.9, 153.9, 153.8, 144.2, 139.2, 138.5, 137.4, 132.2, 132.1, 131.3, 130.5, 130.4, 130.0, 129.9, 129.7, 128.5, 126.5, 126.1, 125.7, 120.7, 118.1, 117.6, 109.5, 81.8, 70.8, 69.3, 68.6, 67.5, 67.2, 62.3, 59.5, 58.5, 50.1, 48.9, 43.0, 36.0, 34.3, 28.9, 24.9, 20.1, 11.3, –1.4.

78. As a result of the sensitivity of this intermediate, its slow conformational equilibrium at ambient temperature, and its instability at elevated temperatures, diazene **55** was used immediately in the next step.

FTIR (thin film)  $\text{cm}^{-1}$ : 2956 (w), 2893 (w), 1703 (s), 1585 (w), 1481 (m), 1403 (s), 1330 (s), 1141 (s), 1053 (m), 860 (m), 753 (s), 699 (s).

HRMS (DART) ( $m/z$ ): calc'd for  $\text{C}_{48}\text{H}_{56}\text{N}_5\text{O}_7\text{SSi}$   $[\text{M}+\text{H}]^+$ : 874.3664,  
found: 874.3678.

$[\alpha]_{\text{D}}^{23}$ : +128 ( $c = 0.82$ ,  $\text{CH}_2\text{Cl}_2$ ).

TLC (10% ethyl acetate, 45% hexanes, 45% dichloromethane),  $R_f$ : 0.22 (UV, CAM).

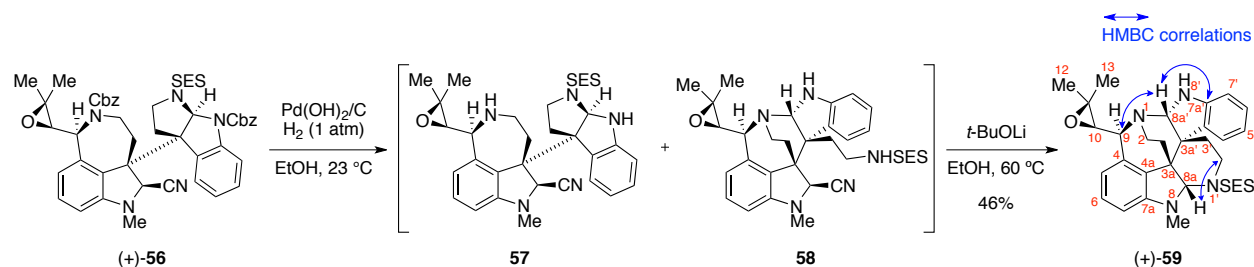

**(+)-N1'-(Trimethylsilyl)ethanesulfonyl iso-communesin (59):**

A sample of palladium(II) hydroxide on carbon (15.7 wt% on wet support, 3.2 mg, 3.6  $\mu\text{mol}$ , 0.60 equiv) was added to a solution of heterodimer (+)-**56** (5.3 mg, 6.0  $\mu\text{mol}$ , 1 equiv) in anhydrous ethanol (200 proof, 400  $\mu\text{L}$ ) at 23  $^{\circ}\text{C}$ . The resulting suspension was sparged with dihydrogen for 7 min by discharge of a balloon equipped with a needle extending into the reaction mixture. After vigorous stirring for 3.5 h under an atmosphere of dihydrogen, the suspension was sparged with dinitrogen for 5 min and was then diluted with ethyl acetate (6 mL) and filtered through a plug of Celite. The filter cake was washed with ethyl acetate (8 mL) and the colorless filtrate was concentrated under reduced pressure. The resulting residue was filtered through a plug of silica gel (eluent: ethyl acetate) and the filtrate was concentrated under reduced pressure to yield a mixture of heterodimeric diamine **57** (major) and hexacyclic aminonitrile **58** (minor), which was used directly in the next step without further purification.<sup>79</sup>

The crude mixture of **57** and **58** was dissolved in dichloromethane (1 mL) and transferred to a pressure tube equipped with a magnetic stir bar. The transfer was quantitated with additional dichloromethane ( $2 \times 1$  mL) and the resulting solution was concentrated under reduced pressure. The tube was refilled with argon and was then charged with a solution of lithium *tert*-butoxide in anhydrous ethanol (0.20 M, 0.60 mL, 0.12 mmol, 20 equiv). The tube was sealed under an argon atmosphere with a Teflon screwcap and was immersed in a pre-heated oil bath at 60  $^{\circ}\text{C}$ . After stirring at this temperature for 45 h, the homogeneous orange solution was cooled to 23  $^{\circ}\text{C}$  and was diluted with a saturated aqueous sodium bicarbonate solution (5 mL). The mixture was extracted with ethyl acetate ( $3 \times 5$  mL) and the combined organic extracts were washed with a saturated aqueous sodium chloride solution (10 mL), were dried over anhydrous sodium sulfate, were filtered, and were concentrated under reduced pressure. The resulting orange residue was purified by flash column chromatography on silica gel (eluent: 30% $\rightarrow$ 40% ethyl acetate in hexanes) to afford (+)-N1'-(trimethylsilyl)ethanesulfonyl *iso*-communesin (**59**, 1.62 mg, 46.3%) as a white film. Structural assignments were made using additional information from gCOSY, gHSQC, gHMBC, and 1D selective NOESY experiments.

$^1\text{H}$  NMR (600 MHz,  $\text{CD}_3\text{OD}$ , 25  $^{\circ}\text{C}$ ):

$\delta$  7.19 (d,  $J = 7.8$  Hz, 1H, C4'H), 6.89 (t,  $J = 7.8$  Hz, 1H, C6'H), 6.78 (td,  $J = 7.5, 1.3$  Hz, 1H, C6'H), 6.44 (d,  $J = 7.8$  Hz, 1H, C7'H), 6.42 (d,  $J = 7.8$  Hz, 1H, C7'H), 6.18 (td,  $J = 7.5, 1.3$  Hz, 1H, C5'H), 6.05 (d,  $J = 8.0$  Hz, 1H, C5'H), 4.88 (s, 1H, C8a'H), 4.39 (s, 1H, C8a'H), 3.75 (dt,  $J = 15.0, 3.0$  Hz, 1H, C2'H<sub>a</sub>), 3.69 (d,  $J = 9.5$  Hz, 1H, C9'H), 3.57–3.49 (m, 2H, C2'H<sub>a</sub>, C2'H<sub>b</sub>), 3.26–3.13 (m, 3H, C2'H<sub>b</sub>, N1'SO<sub>2</sub>CH<sub>2</sub>), 3.09 (d,  $J = 9.3$  Hz, 1H, C10'H), 2.88 (s, 3H, N8CH<sub>3</sub>), 2.48 (dt,  $J = 13.5, 9.5$  Hz, 1H, C3'H<sub>a</sub>), 2.09 (td,  $J = 13.1, 3.6$  Hz, 1H, C3'H<sub>a</sub>), 2.00–1.94 (m, 1H, C3'H<sub>b</sub>), 1.40 (s, 3H, C12'H<sub>3</sub>), 1.37 (dt,  $J = 13.5,$

79. While **57** and **58** can be separated via flash chromatography on silica gel, the mixture was used directly in the next step since **57** rapidly converts to **58** upon treatment with ethanolic lithium *tert*-butoxide at 23  $^{\circ}\text{C}$  in the subsequent step. See later in this document for *in situ* monitoring of the rearrangement of pure **57** to (+)-**59** by  $^1\text{H}$  NMR spectroscopy.

|                                                             |                                                                                                                                                                                                                                                                                                                                                                                                                                                                                                  |
|-------------------------------------------------------------|--------------------------------------------------------------------------------------------------------------------------------------------------------------------------------------------------------------------------------------------------------------------------------------------------------------------------------------------------------------------------------------------------------------------------------------------------------------------------------------------------|
|                                                             | 2.4 Hz, 1H, C3' <b>H</b> <sub>b</sub> ), 1.21 (s, 3H, C13 <b>H</b> <sub>3</sub> ), 1.16–1.10 (m, 2H, N1'SO <sub>2</sub> CH <sub>2</sub> CH <sub>2</sub> ), 0.13 (s, 9H, Si(CH <sub>3</sub> ) <sub>3</sub> ).                                                                                                                                                                                                                                                                                     |
| <sup>13</sup> C NMR (150.9 MHz, CD <sub>3</sub> OD, 25 °C): | δ 150.5 (2C, C7a, C7a'), 137.6 (C4), 132.9 (C4a'), 132.5 (C4a), 129.8 (C6), 129.2 (C6'), 126.2 (C4'), 118.3 (C5'), 117.6 (C5), 108.5 (C7'), 108.1 (C7), 83.8 (C8a'), 82.9 (C8a), 65.0 (C10), 62.2 (C11), 59.6 (C9), 56.3 (C3a'), 50.5 (N1'SO <sub>2</sub> CH <sub>2</sub> ), 43.4 (C3a), 41.0 (C2), 39.4 (C2'), 35.3 (C3), 33.2 (N8CH <sub>3</sub> ), 31.1 (C3'), 24.9 (C12), 19.6 (C13), 11.6 (N1'SO <sub>2</sub> CH <sub>2</sub> CH <sub>2</sub> ), -2.0 (Si(CH <sub>3</sub> ) <sub>3</sub> ). |
| FTIR (thin film) cm <sup>-1</sup> :                         | 3354 (br-w), 2954 (m), 2925 (m), 2867 (w), 1605 (m), 1468 (s), 1341 (m), 1324 (m), 1144 (s), 1029 (s), 860 (s), 833 (s), 742 (s), 600 (m).                                                                                                                                                                                                                                                                                                                                                       |
| HRMS (DART) ( <i>m/z</i> ):                                 | calc'd for C <sub>31</sub> H <sub>43</sub> N <sub>4</sub> O <sub>3</sub> SSi [M+H] <sup>+</sup> : 579.2820,<br>found: 579.2823.                                                                                                                                                                                                                                                                                                                                                                  |
| [α] <sub>D</sub> <sup>22</sup> :                            | +94 ( <i>c</i> = 0.08, MeOH).                                                                                                                                                                                                                                                                                                                                                                                                                                                                    |
| TLC (40% ethyl acetate in hexanes), R <sub>f</sub> :        | 0.22 (UV, CAM).                                                                                                                                                                                                                                                                                                                                                                                                                                                                                  |

### **In Situ $^1\text{H}$ NMR Monitoring of the Conversion of Heterodimeric Diamine (+)-19 to the Epoxide-bearing Communesin Core:**

Treatment of diamine (+)-19 with lithium *tert*-butoxide (10 equiv) in methanol- $d_4$  provided clean and complete conversion to the desired heptacyclic structure within 20 h at 50 °C as observed by in situ  $^1\text{H}$  NMR spectroscopy. Trace1:  $^1\text{H}$  NMR (500 MHz, 20 °C,  $\text{CD}_3\text{OD}$ ) of pure diamine (+)-19 for reference. Trace2–5: monitoring of the conversion of diamine (+)-19 to the epoxide-bearing communesin core. We observe D-incorporation at C8a (~16%) and at the acidic  $\alpha$ -methylene of the sulfonyl group (84%  $-\text{SO}_2\text{CD}_2-$ , 16%  $-\text{SO}_2\text{CDH}-$ ) of the product.

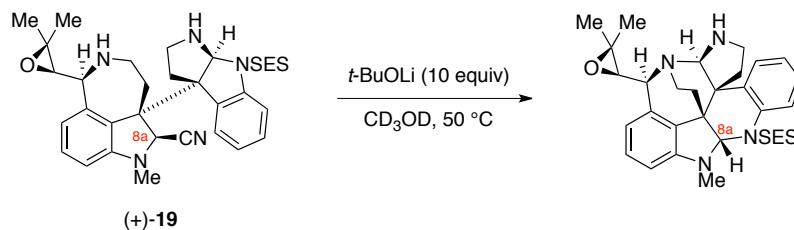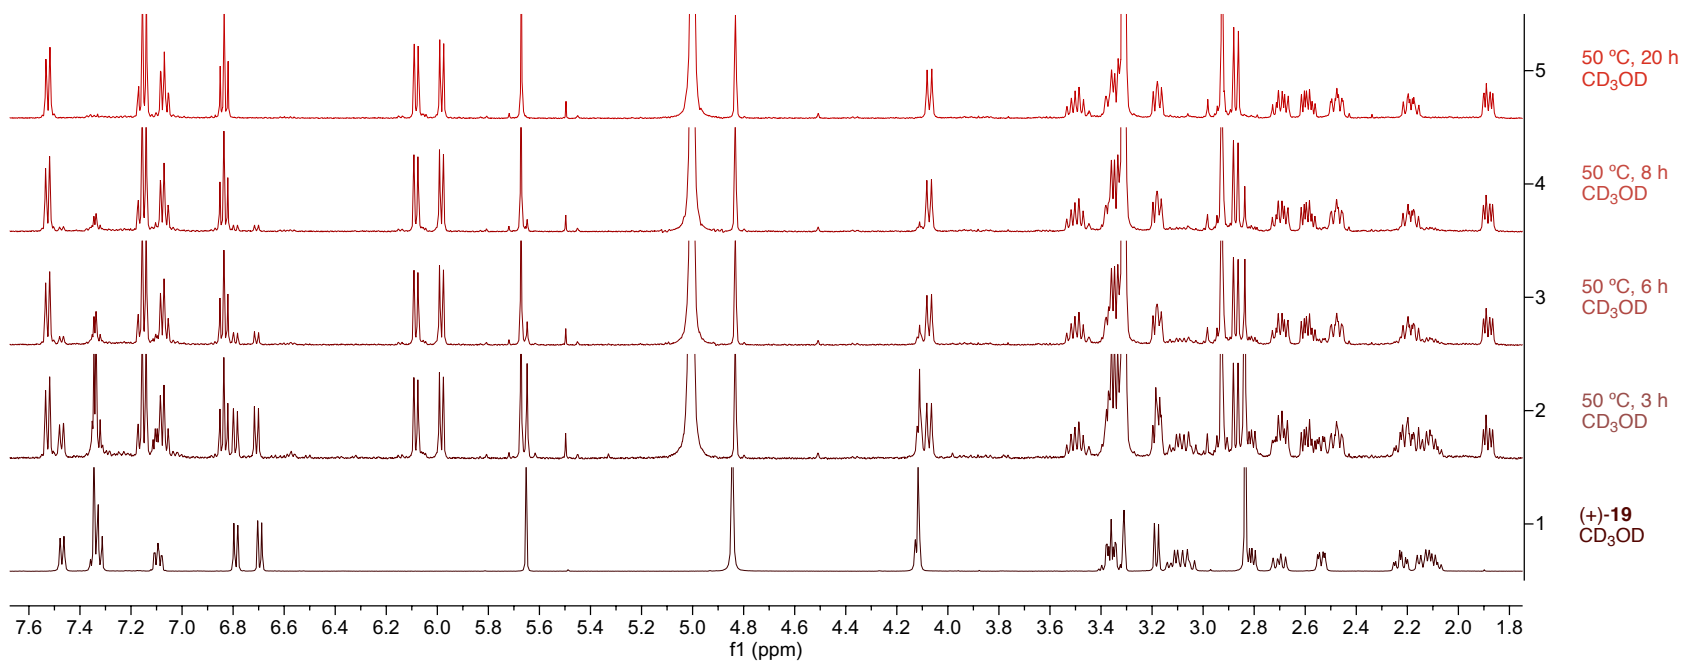



### In Situ $^1\text{H}$ NMR Monitoring of the Conversion of Diamine **57** to Heptacycle (+)-**59**:

Treatment of diamine **57** with lithium *tert*-butoxide in methanol- $d_4$  provided clean and complete conversion to the desired heptacyclic structure (+)-**59** within 40 h at 50° C as observed by in situ  $^1\text{H}$  NMR spectroscopy. Trace1:  $^1\text{H}$  NMR (500 MHz, 20 °C,  $\text{CD}_3\text{OD}$ ) of pure heterodimer **57** for reference. Trace2:  $^1\text{H}$  NMR (500 MHz, 20 °C,  $\text{CD}_3\text{OD}$ ) of pure hexacyclic aminonitrile **58** for reference. Trace 3:  $^1\text{H}$  NMR (500 MHz, 20 °C,  $\text{CD}_3\text{OD}$ ) of **57** with *t*-BuOLi (4.5 equiv) at 23 °C for 45 min, which produced quantitative conversion to **58**. Trace4–7: monitoring of the conversion of hexacyclic aminonitrile **58** to the *iso*-communesin core (+)-**59**. We observe D-incorporation at C8a (~17%) of the product.

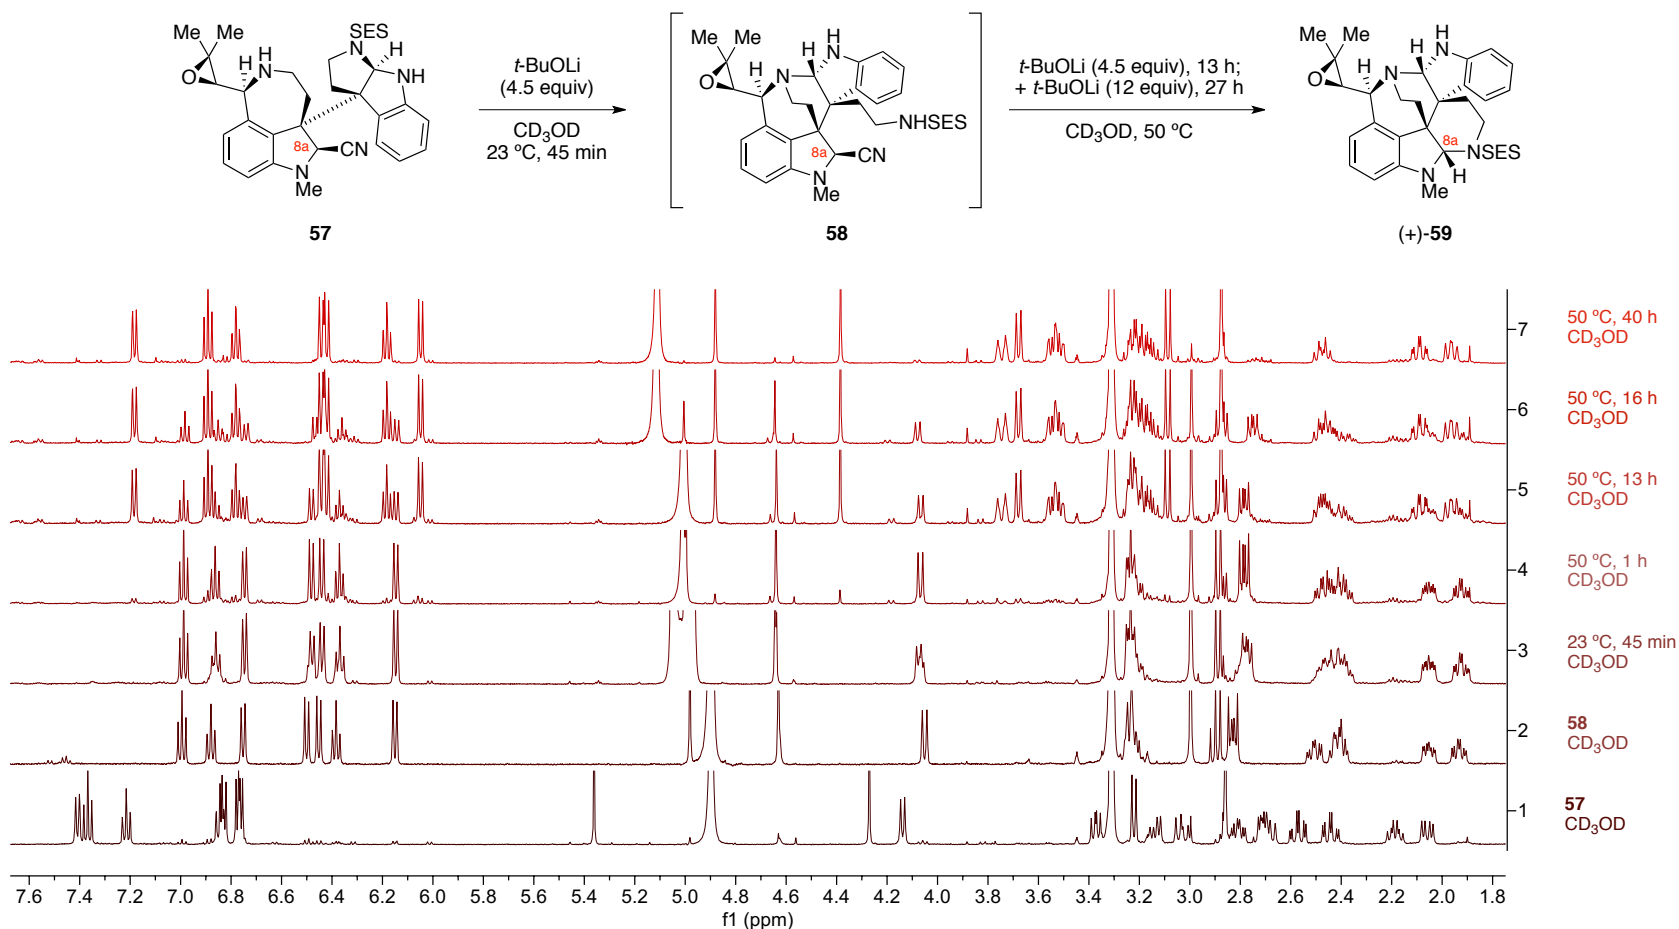

**Crystal Structure of (10*S*)-Tetracyclic Amine (–)-36:**

Structural parameters for (10*S*)-Tetracyclic Amine (–)-36 are freely available from the Cambridge Crystallographic Data Center (CCDC 1937970).

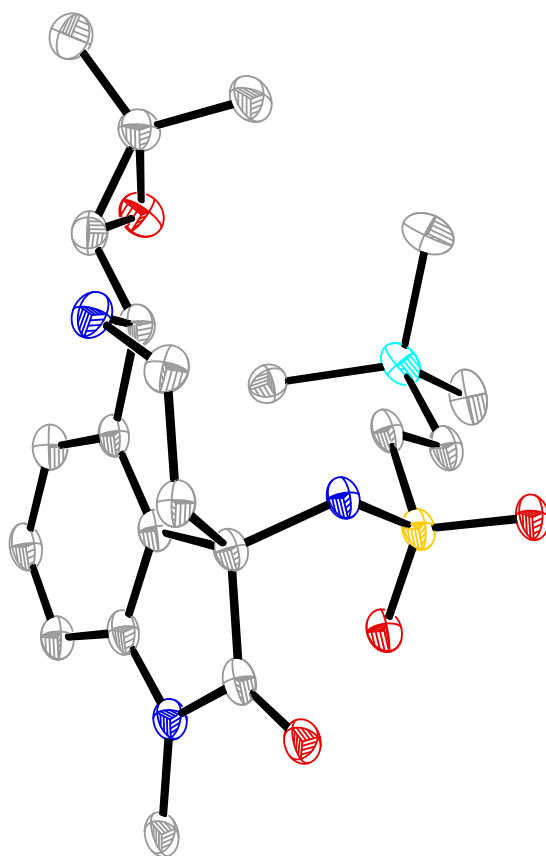

**Table S16.** Crystal data and structure refinement for (10*S*)-Tetracyclic Amine (–)-**36**.

|                                   |                                                                       |                  |
|-----------------------------------|-----------------------------------------------------------------------|------------------|
| Identification code               | 5-19_10                                                               |                  |
| Empirical formula                 | C <sub>21</sub> H <sub>33</sub> N <sub>3</sub> O <sub>4.25</sub> S Si |                  |
| Formula weight                    | 455.65                                                                |                  |
| Temperature                       | 100(2) K                                                              |                  |
| Wavelength                        | 0.71073 Å                                                             |                  |
| Crystal system                    | Monoclinic                                                            |                  |
| Space group                       | P2 <sub>1</sub>                                                       |                  |
| Unit cell dimensions              | a = 13.949(3) Å                                                       | a = 90°.         |
|                                   | b = 9.712(2) Å                                                        | b = 110.621(4)°. |
|                                   | c = 19.552(5) Å                                                       | g = 90°.         |
| Volume                            | 2479.1(10) Å <sup>3</sup>                                             |                  |
| Z                                 | 4                                                                     |                  |
| Density (calculated)              | 1.221 Mg/m <sup>3</sup>                                               |                  |
| Absorption coefficient            | 0.210 mm <sup>-1</sup>                                                |                  |
| F(000)                            | 976                                                                   |                  |
| Crystal size                      | 0.200 x 0.120 x 0.002 mm <sup>3</sup>                                 |                  |
| Theta range for data collection   | 1.565 to 25.025°.                                                     |                  |
| Index ranges                      | -16<=h<=16, -11<=k<=11, -23<=l<=23                                    |                  |
| Reflections collected             | 95005                                                                 |                  |
| Independent reflections           | 8749 [R(int) = 0.1056]                                                |                  |
| Completeness to theta = 25.025°   | 100.0 %                                                               |                  |
| Absorption correction             | Semi-empirical from equivalents                                       |                  |
| Max. and min. transmission        | 0.7454 and 0.5839                                                     |                  |
| Refinement method                 | Full-matrix least-squares on F <sup>2</sup>                           |                  |
| Data / restraints / parameters    | 8749 / 229 / 610                                                      |                  |
| Goodness-of-fit on F <sup>2</sup> | 1.050                                                                 |                  |
| Final R indices [I>2sigma(I)]     | R1 = 0.0503, wR2 = 0.1051                                             |                  |
| R indices (all data)              | R1 = 0.0844, wR2 = 0.1208                                             |                  |
| Absolute structure parameter      | -0.01(3)                                                              |                  |
| Extinction coefficient            | n/a                                                                   |                  |
| Largest diff. peak and hole       | 0.471 and -0.374 e.Å <sup>-3</sup>                                    |                  |

**Table S17.** Atomic coordinates ( $\times 10^4$ ) and equivalent isotropic displacement parameters ( $\text{\AA}^2 \times 10^3$ ) for (10*S*)-Tetracyclic Amine (–)-**36**.  $U(\text{eq})$  is defined as one third of the trace of the orthogonalized  $U_{ij}$  tensor.

|        | x        | y        | z        | $U(\text{eq})$ |
|--------|----------|----------|----------|----------------|
| S(1X)  | 4001(1)  | 4910(2)  | 7283(1)  | 50(1)          |
| O(1X)  | 5022(3)  | 3520(4)  | 9139(2)  | 51(1)          |
| N(1X)  | 3577(4)  | 8774(5)  | 8825(3)  | 49(1)          |
| O(2X)  | 1381(3)  | 9217(5)  | 7073(3)  | 68(2)          |
| C(2X)  | 4577(4)  | 8107(6)  | 9043(4)  | 50(2)          |
| O(3X)  | 4826(3)  | 4926(5)  | 7008(2)  | 64(1)          |
| C(3AX) | 4038(4)  | 5612(6)  | 8645(3)  | 44(2)          |
| C(3X)  | 4654(4)  | 6591(6)  | 9259(3)  | 47(2)          |
| O(4X)  | 3611(3)  | 3637(4)  | 7420(2)  | 62(1)          |
| C(4AX) | 2895(4)  | 5798(6)  | 8465(3)  | 45(2)          |
| C(4X)  | 2298(4)  | 6952(6)  | 8229(3)  | 50(2)          |
| C(5X)  | 1271(4)  | 6852(6)  | 8160(4)  | 57(2)          |
| C(6X)  | 897(4)   | 5644(7)  | 8363(4)  | 64(2)          |
| C(7AX) | 2517(4)  | 4621(6)  | 8674(3)  | 46(2)          |
| C(7X)  | 1505(4)  | 4521(6)  | 8635(4)  | 55(2)          |
| N(8X)  | 3300(3)  | 3643(5)  | 8951(3)  | 46(1)          |
| C(8AX) | 4193(4)  | 4118(6)  | 8936(3)  | 46(2)          |
| C(9X)  | 2811(4)  | 8281(6)  | 8133(3)  | 51(2)          |
| C(10X) | 2045(4)  | 9414(6)  | 7815(4)  | 56(2)          |
| C(11X) | 2074(5)  | 10387(7) | 7254(4)  | 59(2)          |
| C(12X) | 1530(5)  | 11747(7) | 7183(4)  | 67(2)          |
| C(13X) | 2902(5)  | 10370(7) | 6938(4)  | 71(2)          |
| C(14X) | 3145(4)  | 2253(6)  | 9177(4)  | 54(2)          |
| N(15X) | 4389(3)  | 5821(5)  | 8026(3)  | 47(1)          |
| C(21X) | 2998(4)  | 5895(7)  | 6676(3)  | 52(2)          |
| C(22X) | 2558(4)  | 5291(7)  | 5912(3)  | 56(2)          |
| Si(1X) | 1675(5)  | 6518(7)  | 5271(4)  | 55(2)          |
| C(23X) | 630(10)  | 6945(18) | 5611(7)  | 89(5)          |
| C(24X) | 2484(11) | 8045(12) | 5250(7)  | 85(5)          |
| C(25X) | 1109(17) | 5770(30) | 4340(8)  | 58(5)          |
| Si(1Z) | 1364(8)  | 6179(12) | 5286(7)  | 67(3)          |
| C(23Z) | 312(13)  | 5600(30) | 5598(12) | 102(8)         |
| C(24Z) | 1450(20) | 8077(17) | 5350(12) | 103(7)         |
| C(25Z) | 1140(30) | 5560(50) | 4341(12) | 84(10)         |
| S(1Y)  | 7349(1)  | 5191(2)  | 8631(1)  | 49(1)          |
| Si(1Y) | 7938(1)  | 5830(2)  | 6577(1)  | 68(1)          |
| O(1Y)  | 8052(3)  | 3735(4)  | 10425(2) | 57(1)          |
| O(2Y)  | 7006(3)  | 1366(5)  | 6462(3)  | 72(2)          |
| O(3Y)  | 6639(3)  | 6269(4)  | 8617(2)  | 55(1)          |
| O(4Y)  | 8395(2)  | 5336(4)  | 9112(2)  | 55(1)          |
| N(1Y)  | 6394(4)  | 262(6)   | 8083(3)  | 62(2)          |
| C(2Y)  | 6031(4)  | 975(7)   | 8615(4)  | 60(2)          |
| C(3AY) | 7532(4)  | 2640(6)  | 9209(3)  | 45(2)          |
| C(3Y)  | 6830(4)  | 1501(6)  | 9317(3)  | 51(2)          |
| C(4Y)  | 8026(4)  | 1445(6)  | 8181(3)  | 48(2)          |
| C(4AY) | 8242(4)  | 2087(6)  | 8848(3)  | 45(2)          |
| C(5Y)  | 8852(5)  | 1016(6)  | 7998(4)  | 58(2)          |
| C(6Y)  | 9858(5)  | 1189(7)  | 8499(4)  | 60(2)          |
| C(7AY) | 9247(4)  | 2193(6)  | 9348(4)  | 52(2)          |
| C(7Y)  | 10058(4) | 1731(6)  | 9177(4)  | 55(2)          |

|        |          |          |          |       |
|--------|----------|----------|----------|-------|
| N(8Y)  | 9244(3)  | 2779(5)  | 10002(3) | 50(2) |
| C(8AY) | 8285(4)  | 3128(6)  | 9958(4)  | 54(2) |
| C(9Y)  | 6914(4)  | 1159(7)  | 7714(3)  | 54(2) |
| C(10Y) | 6795(5)  | 492(7)   | 6990(4)  | 65(2) |
| C(11Y) | 5988(5)  | 765(8)   | 6303(4)  | 67(2) |
| C(12Y) | 5711(6)  | -306(9)  | 5714(4)  | 92(3) |
| C(13Y) | 5154(5)  | 1816(8)  | 6223(4)  | 76(2) |
| C(14Y) | 10166(4) | 3154(7)  | 10606(4) | 63(2) |
| N(15Y) | 6874(3)  | 3779(5)  | 8814(3)  | 44(1) |
| C(21Y) | 7349(4)  | 4948(6)  | 7741(3)  | 52(2) |
| C(22Y) | 7776(5)  | 6196(7)  | 7466(4)  | 61(2) |
| C(23Y) | 6657(5)  | 5500(10) | 5882(4)  | 95(3) |
| C(24Y) | 8516(6)  | 7396(9)  | 6328(5)  | 91(3) |
| C(25Y) | 8800(6)  | 4309(8)  | 6688(4)  | 71(2) |
| O(1W)  | 4978(7)  | 8264(11) | 7103(7)  | 88(3) |

**Table S18.** Bond lengths [ $\text{\AA}$ ] and angles [ $^\circ$ ] for (10*S*)-Tetracyclic Amine (–)-**36**.

|               |          |               |           |
|---------------|----------|---------------|-----------|
| S(1X)-O(4X)   | 1.414(5) | C(10X)-H(10X) | 1.0000    |
| S(1X)-O(3X)   | 1.431(4) | C(11X)-C(13X) | 1.489(9)  |
| S(1X)-N(15X)  | 1.623(5) | C(11X)-C(12X) | 1.506(9)  |
| S(1X)-C(21X)  | 1.764(6) | C(12X)-H(12A) | 0.9800    |
| O(1X)-C(8AX)  | 1.227(6) | C(12X)-H(12B) | 0.9800    |
| N(1X)-C(2X)   | 1.460(7) | C(12X)-H(12C) | 0.9800    |
| N(1X)-C(9X)   | 1.478(8) | C(13X)-H(13A) | 0.9800    |
| N(1X)-H(1X)   | 0.86(3)  | C(13X)-H(13B) | 0.9800    |
| O(2X)-C(10X)  | 1.433(7) | C(13X)-H(13C) | 0.9800    |
| O(2X)-C(11X)  | 1.452(7) | C(14X)-H(14A) | 0.9800    |
| C(2X)-C(3X)   | 1.525(8) | C(14X)-H(14B) | 0.9800    |
| C(2X)-H(2X1)  | 0.9900   | C(14X)-H(14C) | 0.9800    |
| C(2X)-H(2X2)  | 0.9900   | N(15X)-H(15X) | 0.85(3)   |
| C(3AX)-N(15X) | 1.471(7) | C(21X)-C(22X) | 1.518(8)  |
| C(3AX)-C(4AX) | 1.518(7) | C(21X)-H(21A) | 0.9900    |
| C(3AX)-C(3X)  | 1.535(8) | C(21X)-H(21B) | 0.9900    |
| C(3AX)-C(8AX) | 1.546(8) | C(22X)-Si(1X) | 1.850(9)  |
| C(3X)-H(3X1)  | 0.9900   | C(22X)-Si(1Z) | 1.892(12) |
| C(3X)-H(3X2)  | 0.9900   | C(22X)-H(22A) | 0.9900    |
| C(4AX)-C(4X)  | 1.375(8) | C(22X)-H(22B) | 0.9900    |
| C(4AX)-C(7AX) | 1.379(8) | C(22X)-H(22E) | 0.9900    |
| C(4X)-C(5X)   | 1.394(8) | C(22X)-H(22F) | 0.9900    |
| C(4X)-C(9X)   | 1.519(8) | Si(1X)-C(23X) | 1.850(12) |
| C(5X)-C(6X)   | 1.397(9) | Si(1X)-C(25X) | 1.859(12) |
| C(5X)-H(5X)   | 0.9500   | Si(1X)-C(24X) | 1.872(12) |
| C(6X)-C(7X)   | 1.369(8) | C(23X)-H(23A) | 0.9800    |
| C(6X)-H(6X)   | 0.9500   | C(23X)-H(23B) | 0.9800    |
| C(7AX)-C(7X)  | 1.391(7) | C(23X)-H(23C) | 0.9800    |
| C(7AX)-N(8X)  | 1.405(7) | C(24X)-H(24A) | 0.9800    |
| C(7X)-H(7X)   | 0.9500   | C(24X)-H(24B) | 0.9800    |
| N(8X)-C(8AX)  | 1.338(7) | C(24X)-H(24C) | 0.9800    |
| N(8X)-C(14X)  | 1.460(7) | C(25X)-H(25A) | 0.9800    |
| C(9X)-C(10X)  | 1.507(8) | C(25X)-H(25B) | 0.9800    |
| C(9X)-H(9X)   | 1.0000   | C(25X)-H(25C) | 0.9800    |
| C(10X)-C(11X) | 1.459(9) | Si(1Z)-C(24Z) | 1.849(16) |
|               |          | Si(1Z)-C(25Z) | 1.863(17) |
|               |          | Si(1Z)-C(23Z) | 1.865(15) |
|               |          | C(23Z)-H(23D) | 0.9800    |

|               |           |                      |          |
|---------------|-----------|----------------------|----------|
| C(23Z)-H(23E) | 0.9800    | C(14Y)-H(14D)        | 0.9800   |
| C(23Z)-H(23F) | 0.9800    | C(14Y)-H(14E)        | 0.9800   |
| C(24Z)-H(24D) | 0.9800    | C(14Y)-H(14F)        | 0.9800   |
| C(24Z)-H(24E) | 0.9800    | N(15Y)-H(15Y)        | 0.87(3)  |
| C(24Z)-H(24F) | 0.9800    | C(21Y)-C(22Y)        | 1.529(8) |
| C(25Z)-H(25D) | 0.9800    | C(21Y)-H(21C)        | 0.9900   |
| C(25Z)-H(25E) | 0.9800    | C(21Y)-H(21D)        | 0.9900   |
| C(25Z)-H(25F) | 0.9800    | C(22Y)-H(22C)        | 0.9900   |
| S(1Y)-O(3Y)   | 1.434(4)  | C(22Y)-H(22D)        | 0.9900   |
| S(1Y)-O(4Y)   | 1.437(4)  | C(23Y)-H(23G)        | 0.9800   |
| S(1Y)-N(15Y)  | 1.617(5)  | C(23Y)-H(23H)        | 0.9800   |
| S(1Y)-C(21Y)  | 1.757(6)  | C(23Y)-H(23I)        | 0.9800   |
| Si(1Y)-C(23Y) | 1.852(7)  | C(24Y)-H(24G)        | 0.9800   |
| Si(1Y)-C(22Y) | 1.864(7)  | C(24Y)-H(24H)        | 0.9800   |
| Si(1Y)-C(24Y) | 1.865(8)  | C(24Y)-H(24I)        | 0.9800   |
| Si(1Y)-C(25Y) | 1.868(7)  | C(25Y)-H(25G)        | 0.9800   |
| O(1Y)-C(8AY)  | 1.223(7)  | C(25Y)-H(25H)        | 0.9800   |
| O(2Y)-C(10Y)  | 1.446(8)  | C(25Y)-H(25I)        | 0.9800   |
| O(2Y)-C(11Y)  | 1.464(8)  |                      |          |
| N(1Y)-C(9Y)   | 1.476(8)  | O(4X)-S(1X)-O(3X)    | 119.7(3) |
| N(1Y)-C(2Y)   | 1.479(8)  | O(4X)-S(1X)-N(15X)   | 109.7(3) |
| N(1Y)-H(1Y)   | 0.88(3)   | O(3X)-S(1X)-N(15X)   | 105.8(2) |
| C(2Y)-C(3Y)   | 1.520(8)  | O(4X)-S(1X)-C(21X)   | 109.5(3) |
| C(2Y)-H(2Y1)  | 0.9900    | O(3X)-S(1X)-C(21X)   | 107.1(3) |
| C(2Y)-H(2Y2)  | 0.9900    | N(15X)-S(1X)-C(21X)  | 104.0(3) |
| C(3AY)-N(15Y) | 1.470(7)  | C(2X)-N(1X)-C(9X)    | 115.6(4) |
| C(3AY)-C(4AY) | 1.503(8)  | C(2X)-N(1X)-H(1X)    | 105(4)   |
| C(3AY)-C(3Y)  | 1.541(8)  | C(9X)-N(1X)-H(1X)    | 113(4)   |
| C(3AY)-C(8AY) | 1.545(9)  | C(10X)-O(2X)-C(11X)  | 60.8(4)  |
| C(3Y)-H(3Y1)  | 0.9900    | N(1X)-C(2X)-C(3X)    | 118.4(5) |
| C(3Y)-H(3Y2)  | 0.9900    | N(1X)-C(2X)-H(2X1)   | 107.7    |
| C(4Y)-C(4AY)  | 1.381(8)  | C(3X)-C(2X)-H(2X1)   | 107.7    |
| C(4Y)-C(5Y)   | 1.386(8)  | N(1X)-C(2X)-H(2X2)   | 107.7    |
| C(4Y)-C(9Y)   | 1.523(8)  | C(3X)-C(2X)-H(2X2)   | 107.7    |
| C(4AY)-C(7AY) | 1.403(8)  | H(2X1)-C(2X)-H(2X2)  | 107.1    |
| C(5Y)-C(6Y)   | 1.410(9)  | N(15X)-C(3AX)-C(4AX) | 114.8(5) |
| C(5Y)-H(5Y)   | 0.9500    | N(15X)-C(3AX)-C(3X)  | 107.5(4) |
| C(6Y)-C(7Y)   | 1.360(9)  | C(4AX)-C(3AX)-C(3X)  | 111.1(4) |
| C(6Y)-H(6Y)   | 0.9500    | N(15X)-C(3AX)-C(8AX) | 112.9(4) |
| C(7AY)-C(7Y)  | 1.363(8)  | C(4AX)-C(3AX)-C(8AX) | 101.3(4) |
| C(7AY)-N(8Y)  | 1.401(8)  | C(3X)-C(3AX)-C(8AX)  | 109.0(5) |
| C(7Y)-H(7Y)   | 0.9500    | C(2X)-C(3X)-C(3AX)   | 114.6(5) |
| N(8Y)-C(8AY)  | 1.352(7)  | C(2X)-C(3X)-H(3X1)   | 108.6    |
| N(8Y)-C(14Y)  | 1.453(8)  | C(3AX)-C(3X)-H(3X1)  | 108.6    |
| C(9Y)-C(10Y)  | 1.511(9)  | C(2X)-C(3X)-H(3X2)   | 108.6    |
| C(9Y)-H(9Y)   | 1.0000    | C(3AX)-C(3X)-H(3X2)  | 108.6    |
| C(10Y)-C(11Y) | 1.442(9)  | H(3X1)-C(3X)-H(3X2)  | 107.6    |
| C(10Y)-H(10Y) | 1.0000    | C(4X)-C(4AX)-C(7AX)  | 121.7(5) |
| C(11Y)-C(12Y) | 1.497(10) | C(4X)-C(4AX)-C(3AX)  | 129.6(5) |
| C(11Y)-C(13Y) | 1.514(9)  | C(7AX)-C(4AX)-C(3AX) | 108.2(5) |
| C(12Y)-H(12D) | 0.9800    | C(4AX)-C(4X)-C(5X)   | 117.1(5) |
| C(12Y)-H(12E) | 0.9800    | C(4AX)-C(4X)-C(9X)   | 118.6(5) |
| C(12Y)-H(12F) | 0.9800    | C(5X)-C(4X)-C(9X)    | 124.0(5) |
| C(13Y)-H(13D) | 0.9800    | C(4X)-C(5X)-C(6X)    | 120.3(6) |
| C(13Y)-H(13E) | 0.9800    | C(4X)-C(5X)-H(5X)    | 119.8    |
| C(13Y)-H(13F) | 0.9800    | C(6X)-C(5X)-H(5X)    | 119.8    |

|                      |          |                      |           |
|----------------------|----------|----------------------|-----------|
| C(7X)-C(6X)-C(5X)    | 122.5(5) | S(1X)-C(21X)-H(21A)  | 108.8     |
| C(7X)-C(6X)-H(6X)    | 118.8    | C(22X)-C(21X)-H(21B) | 108.8     |
| C(5X)-C(6X)-H(6X)    | 118.8    | S(1X)-C(21X)-H(21B)  | 108.8     |
| C(4AX)-C(7AX)-C(7X)  | 121.9(5) | H(21A)-C(21X)-H(21B) | 107.7     |
| C(4AX)-C(7AX)-N(8X)  | 110.4(4) | C(21X)-C(22X)-Si(1X) | 111.1(5)  |
| C(7X)-C(7AX)-N(8X)   | 127.6(5) | C(21X)-C(22X)-Si(1Z) | 114.8(5)  |
| C(6X)-C(7X)-C(7AX)   | 116.3(6) | C(21X)-C(22X)-H(22A) | 109.4     |
| C(6X)-C(7X)-H(7X)    | 121.8    | Si(1X)-C(22X)-H(22A) | 109.4     |
| C(7AX)-C(7X)-H(7X)   | 121.8    | C(21X)-C(22X)-H(22B) | 109.4     |
| C(8AX)-N(8X)-C(7AX)  | 111.2(5) | Si(1X)-C(22X)-H(22B) | 109.4     |
| C(8AX)-N(8X)-C(14X)  | 124.3(5) | H(22A)-C(22X)-H(22B) | 108.0     |
| C(7AX)-N(8X)-C(14X)  | 124.4(4) | C(21X)-C(22X)-H(22E) | 108.6     |
| O(1X)-C(8AX)-N(8X)   | 127.5(5) | Si(1Z)-C(22X)-H(22E) | 108.6     |
| O(1X)-C(8AX)-C(3AX)  | 123.8(5) | C(21X)-C(22X)-H(22F) | 108.6     |
| N(8X)-C(8AX)-C(3AX)  | 108.7(5) | Si(1Z)-C(22X)-H(22F) | 108.6     |
| N(1X)-C(9X)-C(10X)   | 108.6(5) | H(22E)-C(22X)-H(22F) | 107.5     |
| N(1X)-C(9X)-C(4X)    | 112.5(5) | C(22X)-Si(1X)-C(23X) | 108.7(6)  |
| C(10X)-C(9X)-C(4X)   | 112.1(5) | C(22X)-Si(1X)-C(25X) | 111.2(9)  |
| N(1X)-C(9X)-H(9X)    | 107.8    | C(23X)-Si(1X)-C(25X) | 108.8(9)  |
| C(10X)-C(9X)-H(9X)   | 107.8    | C(22X)-Si(1X)-C(24X) | 105.2(5)  |
| C(4X)-C(9X)-H(9X)    | 107.8    | C(23X)-Si(1X)-C(24X) | 112.8(8)  |
| O(2X)-C(10X)-C(11X)  | 60.3(4)  | C(25X)-Si(1X)-C(24X) | 110.0(9)  |
| O(2X)-C(10X)-C(9X)   | 115.6(5) | Si(1X)-C(23X)-H(23A) | 109.5     |
| C(11X)-C(10X)-C(9X)  | 125.5(6) | Si(1X)-C(23X)-H(23B) | 109.5     |
| O(2X)-C(10X)-H(10X)  | 114.6    | H(23A)-C(23X)-H(23B) | 109.5     |
| C(11X)-C(10X)-H(10X) | 114.6    | Si(1X)-C(23X)-H(23C) | 109.5     |
| C(9X)-C(10X)-H(10X)  | 114.6    | H(23A)-C(23X)-H(23C) | 109.5     |
| O(2X)-C(11X)-C(10X)  | 59.0(4)  | H(23B)-C(23X)-H(23C) | 109.5     |
| O(2X)-C(11X)-C(13X)  | 115.9(5) | Si(1X)-C(24X)-H(24A) | 109.5     |
| C(10X)-C(11X)-C(13X) | 122.3(6) | Si(1X)-C(24X)-H(24B) | 109.5     |
| O(2X)-C(11X)-C(12X)  | 113.1(5) | H(24A)-C(24X)-H(24B) | 109.5     |
| C(10X)-C(11X)-C(12X) | 119.4(6) | Si(1X)-C(24X)-H(24C) | 109.5     |
| C(13X)-C(11X)-C(12X) | 114.3(6) | H(24A)-C(24X)-H(24C) | 109.5     |
| C(11X)-C(12X)-H(12A) | 109.5    | H(24B)-C(24X)-H(24C) | 109.5     |
| C(11X)-C(12X)-H(12B) | 109.5    | Si(1X)-C(25X)-H(25A) | 109.5     |
| H(12A)-C(12X)-H(12B) | 109.5    | Si(1X)-C(25X)-H(25B) | 109.5     |
| C(11X)-C(12X)-H(12C) | 109.5    | H(25A)-C(25X)-H(25B) | 109.5     |
| H(12A)-C(12X)-H(12C) | 109.5    | Si(1X)-C(25X)-H(25C) | 109.5     |
| H(12B)-C(12X)-H(12C) | 109.5    | H(25A)-C(25X)-H(25C) | 109.5     |
| C(11X)-C(13X)-H(13A) | 109.5    | H(25B)-C(25X)-H(25C) | 109.5     |
| C(11X)-C(13X)-H(13B) | 109.5    | C(24Z)-Si(1Z)-C(25Z) | 112.0(15) |
| H(13A)-C(13X)-H(13B) | 109.5    | C(24Z)-Si(1Z)-C(23Z) | 108.7(12) |
| C(11X)-C(13X)-H(13C) | 109.5    | C(25Z)-Si(1Z)-C(23Z) | 110.5(15) |
| H(13A)-C(13X)-H(13C) | 109.5    | C(24Z)-Si(1Z)-C(22X) | 112.8(9)  |
| H(13B)-C(13X)-H(13C) | 109.5    | C(25Z)-Si(1Z)-C(22X) | 107.2(15) |
| N(8X)-C(14X)-H(14A)  | 109.5    | C(23Z)-Si(1Z)-C(22X) | 105.3(9)  |
| N(8X)-C(14X)-H(14B)  | 109.5    | Si(1Z)-C(23Z)-H(23D) | 109.5     |
| H(14A)-C(14X)-H(14B) | 109.5    | Si(1Z)-C(23Z)-H(23E) | 109.5     |
| N(8X)-C(14X)-H(14C)  | 109.5    | H(23D)-C(23Z)-H(23E) | 109.5     |
| H(14A)-C(14X)-H(14C) | 109.5    | Si(1Z)-C(23Z)-H(23F) | 109.5     |
| H(14B)-C(14X)-H(14C) | 109.5    | H(23D)-C(23Z)-H(23F) | 109.5     |
| C(3AX)-N(15X)-S(1X)  | 124.0(4) | H(23E)-C(23Z)-H(23F) | 109.5     |
| C(3AX)-N(15X)-H(15X) | 119(4)   | Si(1Z)-C(24Z)-H(24D) | 109.5     |
| S(1X)-N(15X)-H(15X)  | 108(4)   | Si(1Z)-C(24Z)-H(24E) | 109.5     |
| C(22X)-C(21X)-S(1X)  | 113.7(4) | H(24D)-C(24Z)-H(24E) | 109.5     |
| C(22X)-C(21X)-H(21A) | 108.8    | Si(1Z)-C(24Z)-H(24F) | 109.5     |

|                      |          |                      |          |
|----------------------|----------|----------------------|----------|
| H(24D)-C(24Z)-H(24F) | 109.5    | N(8Y)-C(7AY)-C(4AY)  | 110.0(5) |
| H(24E)-C(24Z)-H(24F) | 109.5    | C(6Y)-C(7Y)-C(7AY)   | 117.6(6) |
| Si(1Z)-C(25Z)-H(25D) | 109.5    | C(6Y)-C(7Y)-H(7Y)    | 121.2    |
| Si(1Z)-C(25Z)-H(25E) | 109.5    | C(7AY)-C(7Y)-H(7Y)   | 121.2    |
| H(25D)-C(25Z)-H(25E) | 109.5    | C(8AY)-N(8Y)-C(7AY)  | 111.4(5) |
| Si(1Z)-C(25Z)-H(25F) | 109.5    | C(8AY)-N(8Y)-C(14Y)  | 124.2(6) |
| H(25D)-C(25Z)-H(25F) | 109.5    | C(7AY)-N(8Y)-C(14Y)  | 123.8(5) |
| H(25E)-C(25Z)-H(25F) | 109.5    | O(1Y)-C(8AY)-N(8Y)   | 126.1(6) |
| O(3Y)-S(1Y)-O(4Y)    | 118.4(3) | O(1Y)-C(8AY)-C(3AY)  | 125.7(5) |
| O(3Y)-S(1Y)-N(15Y)   | 106.9(2) | N(8Y)-C(8AY)-C(3AY)  | 108.1(5) |
| O(4Y)-S(1Y)-N(15Y)   | 109.8(2) | N(1Y)-C(9Y)-C(10Y)   | 107.1(5) |
| O(3Y)-S(1Y)-C(21Y)   | 108.6(3) | N(1Y)-C(9Y)-C(4Y)    | 112.7(5) |
| O(4Y)-S(1Y)-C(21Y)   | 107.8(3) | C(10Y)-C(9Y)-C(4Y)   | 113.1(5) |
| N(15Y)-S(1Y)-C(21Y)  | 104.4(3) | N(1Y)-C(9Y)-H(9Y)    | 107.9    |
| C(23Y)-Si(1Y)-C(22Y) | 108.3(3) | C(10Y)-C(9Y)-H(9Y)   | 107.9    |
| C(23Y)-Si(1Y)-C(24Y) | 110.1(4) | C(4Y)-C(9Y)-H(9Y)    | 107.9    |
| C(22Y)-Si(1Y)-C(24Y) | 107.0(4) | C(11Y)-C(10Y)-O(2Y)  | 60.9(4)  |
| C(23Y)-Si(1Y)-C(25Y) | 111.3(4) | C(11Y)-C(10Y)-C(9Y)  | 125.9(6) |
| C(22Y)-Si(1Y)-C(25Y) | 109.1(3) | O(2Y)-C(10Y)-C(9Y)   | 115.7(6) |
| C(24Y)-Si(1Y)-C(25Y) | 110.8(3) | C(11Y)-C(10Y)-H(10Y) | 114.3    |
| C(10Y)-O(2Y)-C(11Y)  | 59.4(4)  | O(2Y)-C(10Y)-H(10Y)  | 114.3    |
| C(9Y)-N(1Y)-C(2Y)    | 114.7(5) | C(9Y)-C(10Y)-H(10Y)  | 114.3    |
| C(9Y)-N(1Y)-H(1Y)    | 115(5)   | C(10Y)-C(11Y)-O(2Y)  | 59.7(4)  |
| C(2Y)-N(1Y)-H(1Y)    | 110(5)   | C(10Y)-C(11Y)-C(12Y) | 119.7(6) |
| N(1Y)-C(2Y)-C(3Y)    | 117.9(5) | O(2Y)-C(11Y)-C(12Y)  | 114.1(6) |
| N(1Y)-C(2Y)-H(2Y1)   | 107.8    | C(10Y)-C(11Y)-C(13Y) | 122.6(6) |
| C(3Y)-C(2Y)-H(2Y1)   | 107.8    | O(2Y)-C(11Y)-C(13Y)  | 113.9(6) |
| N(1Y)-C(2Y)-H(2Y2)   | 107.8    | C(12Y)-C(11Y)-C(13Y) | 114.1(6) |
| C(3Y)-C(2Y)-H(2Y2)   | 107.8    | C(11Y)-C(12Y)-H(12D) | 109.5    |
| H(2Y1)-C(2Y)-H(2Y2)  | 107.2    | C(11Y)-C(12Y)-H(12E) | 109.5    |
| N(15Y)-C(3AY)-C(4AY) | 114.5(5) | H(12D)-C(12Y)-H(12E) | 109.5    |
| N(15Y)-C(3AY)-C(3Y)  | 107.6(4) | C(11Y)-C(12Y)-H(12F) | 109.5    |
| C(4AY)-C(3AY)-C(3Y)  | 111.3(5) | H(12D)-C(12Y)-H(12F) | 109.5    |
| N(15Y)-C(3AY)-C(8AY) | 110.9(5) | H(12E)-C(12Y)-H(12F) | 109.5    |
| C(4AY)-C(3AY)-C(8AY) | 102.3(4) | C(11Y)-C(13Y)-H(13D) | 109.5    |
| C(3Y)-C(3AY)-C(8AY)  | 110.1(5) | C(11Y)-C(13Y)-H(13E) | 109.5    |
| C(2Y)-C(3Y)-C(3AY)   | 114.6(5) | H(13D)-C(13Y)-H(13E) | 109.5    |
| C(2Y)-C(3Y)-H(3Y1)   | 108.6    | C(11Y)-C(13Y)-H(13F) | 109.5    |
| C(3AY)-C(3Y)-H(3Y1)  | 108.6    | H(13D)-C(13Y)-H(13F) | 109.5    |
| C(2Y)-C(3Y)-H(3Y2)   | 108.6    | H(13E)-C(13Y)-H(13F) | 109.5    |
| C(3AY)-C(3Y)-H(3Y2)  | 108.6    | N(8Y)-C(14Y)-H(14D)  | 109.5    |
| H(3Y1)-C(3Y)-H(3Y2)  | 107.6    | N(8Y)-C(14Y)-H(14E)  | 109.5    |
| C(4AY)-C(4Y)-C(5Y)   | 117.1(5) | H(14D)-C(14Y)-H(14E) | 109.5    |
| C(4AY)-C(4Y)-C(9Y)   | 119.1(5) | N(8Y)-C(14Y)-H(14F)  | 109.5    |
| C(5Y)-C(4Y)-C(9Y)    | 123.7(6) | H(14D)-C(14Y)-H(14F) | 109.5    |
| C(4Y)-C(4AY)-C(7AY)  | 121.6(5) | H(14E)-C(14Y)-H(14F) | 109.5    |
| C(4Y)-C(4AY)-C(3AY)  | 130.1(5) | C(3AY)-N(15Y)-S(1Y)  | 121.7(3) |
| C(7AY)-C(4AY)-C(3AY) | 108.0(5) | C(3AY)-N(15Y)-H(15Y) | 117(4)   |
| C(4Y)-C(5Y)-C(6Y)    | 119.9(6) | S(1Y)-N(15Y)-H(15Y)  | 110(4)   |
| C(4Y)-C(5Y)-H(5Y)    | 120.0    | C(22Y)-C(21Y)-S(1Y)  | 112.3(5) |
| C(6Y)-C(5Y)-H(5Y)    | 120.0    | C(22Y)-C(21Y)-H(21C) | 109.2    |
| C(7Y)-C(6Y)-C(5Y)    | 122.4(6) | S(1Y)-C(21Y)-H(21C)  | 109.2    |
| C(7Y)-C(6Y)-H(6Y)    | 118.8    | C(22Y)-C(21Y)-H(21D) | 109.2    |
| C(5Y)-C(6Y)-H(6Y)    | 118.8    | S(1Y)-C(21Y)-H(21D)  | 109.2    |
| C(7Y)-C(7AY)-N(8Y)   | 128.9(6) | H(21C)-C(21Y)-H(21D) | 107.9    |
| C(7Y)-C(7AY)-C(4AY)  | 121.1(6) | C(21Y)-C(22Y)-Si(1Y) | 111.6(5) |



|                      |       |                      |       |
|----------------------|-------|----------------------|-------|
| C(21Y)-C(22Y)-H(22C) | 109.3 | Si(1Y)-C(24Y)-H(24I) | 109.5 |
| Si(1Y)-C(22Y)-H(22C) | 109.3 | H(24G)-C(24Y)-H(24I) | 109.5 |
| C(21Y)-C(22Y)-H(22D) | 109.3 | H(24H)-C(24Y)-H(24I) | 109.5 |
| Si(1Y)-C(22Y)-H(22D) | 109.3 | Si(1Y)-C(25Y)-H(25G) | 109.5 |
| H(22C)-C(22Y)-H(22D) | 108.0 | Si(1Y)-C(25Y)-H(25H) | 109.5 |
| Si(1Y)-C(23Y)-H(23G) | 109.5 | H(25G)-C(25Y)-H(25H) | 109.5 |
| Si(1Y)-C(23Y)-H(23H) | 109.5 | Si(1Y)-C(25Y)-H(25I) | 109.5 |
| H(23G)-C(23Y)-H(23H) | 109.5 | H(25G)-C(25Y)-H(25I) | 109.5 |
| Si(1Y)-C(23Y)-H(23I) | 109.5 | H(25H)-C(25Y)-H(25I) | 109.5 |
| H(23G)-C(23Y)-H(23I) | 109.5 |                      |       |
| H(23H)-C(23Y)-H(23I) | 109.5 |                      |       |
| Si(1Y)-C(24Y)-H(24G) | 109.5 |                      |       |
| Si(1Y)-C(24Y)-H(24H) | 109.5 |                      |       |
| H(24G)-C(24Y)-H(24H) | 109.5 |                      |       |

---

Symmetry transformations used to generate equivalent atoms:

**Table S19.** Anisotropic displacement parameters ( $\text{\AA}^2 \times 10^3$ ) for (10*S*)-Tetracyclic Amine (–)-**36**. The anisotropic displacement factor exponent takes the form:  $-2p^2 [ h^2 a^* 2U^{11} + \dots + 2 h k a^* b^* U^{12} ]$

|        | U <sup>11</sup> | U <sup>22</sup> | U <sup>33</sup> | U <sup>23</sup> | U <sup>13</sup> | U <sup>12</sup> |
|--------|-----------------|-----------------|-----------------|-----------------|-----------------|-----------------|
| S(1X)  | 41(1)           | 46(1)           | 64(1)           | -4(1)           | 21(1)           | 7(1)            |
| O(1X)  | 32(2)           | 50(3)           | 74(3)           | 4(2)            | 22(2)           | 5(2)            |
| N(1X)  | 47(3)           | 41(3)           | 62(3)           | -5(3)           | 24(3)           | 2(2)            |
| O(2X)  | 55(3)           | 53(3)           | 85(3)           | -2(3)           | 10(2)           | 3(2)            |
| C(2X)  | 39(3)           | 50(4)           | 68(4)           | -12(3)          | 27(3)           | -7(3)           |
| O(3X)  | 48(2)           | 73(3)           | 76(3)           | -15(3)          | 30(2)           | 10(2)           |
| C(3AX) | 29(3)           | 47(4)           | 60(4)           | -4(3)           | 19(2)           | 1(2)            |
| C(3X)  | 35(3)           | 49(4)           | 60(4)           | -5(3)           | 20(3)           | -4(3)           |
| O(4X)  | 83(3)           | 36(2)           | 67(3)           | -4(2)           | 25(2)           | -1(2)           |
| C(4AX) | 34(3)           | 40(3)           | 63(4)           | -12(3)          | 19(3)           | 4(2)            |
| C(4X)  | 41(3)           | 43(3)           | 67(4)           | -14(3)          | 21(3)           | 1(3)            |
| C(5X)  | 40(3)           | 41(4)           | 85(5)           | -6(3)           | 18(3)           | 4(3)            |
| C(6X)  | 29(3)           | 58(4)           | 107(5)          | -23(4)          | 25(3)           | 1(3)            |
| C(7AX) | 33(3)           | 46(4)           | 58(4)           | -14(3)          | 14(3)           | -2(2)           |
| C(7X)  | 38(3)           | 40(3)           | 88(5)           | -9(3)           | 22(3)           | -4(3)           |
| N(8X)  | 33(2)           | 40(3)           | 66(3)           | -4(2)           | 18(2)           | 0(2)            |
| C(8AX) | 40(3)           | 46(4)           | 54(4)           | -5(3)           | 19(3)           | 2(3)            |
| C(9X)  | 48(3)           | 42(4)           | 66(4)           | -7(3)           | 22(3)           | 9(3)            |
| C(10X) | 49(4)           | 47(4)           | 73(5)           | -7(3)           | 24(3)           | 2(3)            |
| C(11X) | 57(4)           | 43(4)           | 74(4)           | -10(3)          | 18(3)           | 2(3)            |
| C(12X) | 63(4)           | 46(4)           | 91(5)           | 5(4)            | 26(4)           | 6(3)            |
| C(13X) | 89(5)           | 48(4)           | 89(5)           | -2(4)           | 48(4)           | 11(4)           |
| C(14X) | 43(3)           | 42(4)           | 75(4)           | -1(3)           | 18(3)           | -3(3)           |
| N(15X) | 33(2)           | 48(3)           | 64(3)           | -2(2)           | 22(2)           | 2(2)            |
| C(21X) | 43(3)           | 53(4)           | 64(4)           | -3(3)           | 25(3)           | 9(3)            |
| C(22X) | 57(3)           | 49(4)           | 69(4)           | -4(3)           | 29(3)           | 2(3)            |
| Si(1X) | 65(3)           | 51(3)           | 52(2)           | 2(2)            | 24(2)           | 9(2)            |
| C(23X) | 82(8)           | 113(12)         | 68(8)           | -10(8)          | 23(7)           | 34(8)           |
| C(24X) | 117(11)         | 68(8)           | 53(7)           | 3(6)            | 9(7)            | -19(7)          |
| C(25X) | 52(9)           | 58(9)           | 65(8)           | -9(8)           | 21(7)           | 8(7)            |
| Si(1Z) | 63(5)           | 78(6)           | 66(4)           | 7(4)            | 31(4)           | 0(4)            |
| C(23Z) | 73(11)          | 160(20)         | 86(13)          | -10(15)         | 44(10)          | 0(13)           |
| C(24Z) | 131(17)         | 91(10)          | 79(13)          | -3(10)          | 27(12)          | 17(12)          |

|        |         |        |        |        |        |        |
|--------|---------|--------|--------|--------|--------|--------|
| C(25Z) | 100(20) | 90(20) | 63(11) | 12(12) | 32(13) | 15(18) |
| S(1Y)  | 33(1)   | 43(1)  | 74(1)  | 6(1)   | 22(1)  | 1(1)   |
| Si(1Y) | 56(1)   | 78(2)  | 74(2)  | 25(1)  | 27(1)  | 5(1)   |
| O(1Y)  | 48(2)   | 54(3)  | 68(3)  | 1(2)   | 20(2)  | 11(2)  |
| O(2Y)  | 60(3)   | 93(4)  | 72(3)  | 5(3)   | 33(2)  | 9(3)   |
| O(3Y)  | 38(2)   | 49(3)  | 84(3)  | 4(2)   | 30(2)  | 6(2)   |
| O(4Y)  | 30(2)   | 47(2)  | 87(3)  | 7(2)   | 20(2)  | -5(2)  |
| N(1Y)  | 65(3)   | 48(3)  | 78(4)  | -2(3)  | 31(3)  | -9(3)  |
| C(2Y)  | 51(4)   | 55(4)  | 81(5)  | 0(4)   | 34(3)  | -12(3) |
| C(3AY) | 35(3)   | 47(4)  | 60(4)  | 8(3)   | 25(3)  | 5(2)   |
| C(3Y)  | 50(3)   | 44(4)  | 69(4)  | 6(3)   | 33(3)  | -4(3)  |
| C(4Y)  | 46(3)   | 38(3)  | 67(4)  | 10(3)  | 27(3)  | 5(3)   |
| C(4AY) | 35(3)   | 41(3)  | 66(4)  | 9(3)   | 26(3)  | 1(2)   |
| C(5Y)  | 58(4)   | 50(4)  | 79(5)  | 9(3)   | 39(3)  | 3(3)   |
| C(6Y)  | 48(4)   | 51(4)  | 91(5)  | 15(4)  | 38(3)  | 11(3)  |
| C(7AY) | 43(3)   | 39(3)  | 80(5)  | 10(3)  | 27(3)  | 2(3)   |
| C(7Y)  | 40(3)   | 45(4)  | 86(5)  | 6(3)   | 27(3)  | 1(3)   |
| N(8Y)  | 37(3)   | 44(3)  | 69(4)  | 2(3)   | 17(2)  | 3(2)   |
| C(8AY) | 47(4)   | 45(4)  | 75(5)  | 12(3)  | 27(3)  | 10(3)  |
| C(9Y)  | 54(4)   | 49(4)  | 64(4)  | 5(3)   | 27(3)  | 2(3)   |
| C(10Y) | 67(4)   | 53(4)  | 77(5)  | 0(4)   | 26(4)  | 8(3)   |
| C(11Y) | 55(4)   | 79(5)  | 69(5)  | -6(4)  | 26(3)  | 9(4)   |
| C(12Y) | 93(6)   | 85(6)  | 91(6)  | -23(5) | 23(5)  | 18(5)  |
| C(13Y) | 57(4)   | 92(6)  | 80(5)  | -4(4)  | 27(4)  | 24(4)  |
| C(14Y) | 44(4)   | 52(4)  | 86(5)  | 2(4)   | 14(3)  | 11(3)  |
| N(15Y) | 32(2)   | 42(3)  | 64(3)  | 8(2)   | 23(2)  | 3(2)   |
| C(21Y) | 40(3)   | 47(4)  | 77(4)  | 17(3)  | 29(3)  | 6(3)   |
| C(22Y) | 47(3)   | 55(4)  | 88(5)  | 14(4)  | 33(3)  | 8(3)   |
| C(23Y) | 70(5)   | 122(8) | 83(5)  | 16(5)  | 15(4)  | -4(5)  |
| C(24Y) | 96(6)   | 81(6)  | 124(7) | 38(5)  | 73(5)  | 19(5)  |
| C(25Y) | 82(5)   | 72(5)  | 61(4)  | -4(4)  | 28(4)  | 5(4)   |
| O(1W)  | 64(6)   | 78(7)  | 125(9) | 2(7)   | 35(6)  | 4(5)   |

**Table S20.** Hydrogen coordinates ( $\times 10^4$ ) and isotropic displacement parameters ( $\text{\AA}^2 \times 10^3$ ) for (10*S*)-Tetracyclic Amine (–)-**36**.

|        | x        | y        | z        | U(eq) |
|--------|----------|----------|----------|-------|
| H(1X)  | 3380(50) | 8680(70) | 9190(20) | 59    |
| H(2X1) | 5050     | 8629     | 9461     | 60    |
| H(2X2) | 4834     | 8202     | 8633     | 60    |
| H(3X1) | 4414     | 6483     | 9675     | 56    |
| H(3X2) | 5383     | 6313     | 9428     | 56    |
| H(5X)  | 824      | 7609     | 7975     | 68    |
| H(6X)  | 194      | 5601     | 8310     | 77    |
| H(7X)  | 1249     | 3717     | 8789     | 67    |
| H(9X)  | 3175     | 8096     | 7784     | 62    |
| H(10X) | 1698     | 9767     | 8149     | 67    |
| H(12A) | 1229     | 12000    | 6665     | 101   |
| H(12B) | 2020     | 12457    | 7447     | 101   |
| H(12C) | 986      | 11671    | 7389     | 101   |
| H(13A) | 3167     | 9431     | 6957     | 106   |

|        |          |          |          |     |
|--------|----------|----------|----------|-----|
| H(13B) | 3457     | 10984    | 7222     | 106 |
| H(13C) | 2627     | 10683    | 6430     | 106 |
| H(14A) | 3761     | 1701     | 9249     | 81  |
| H(14B) | 2560     | 1828     | 8798     | 81  |
| H(14C) | 3011     | 2296     | 9636     | 81  |
| H(15X) | 5010(20) | 6050(60) | 8110(30) | 57  |
| H(21A) | 2443     | 5978     | 6879     | 62  |
| H(21B) | 3256     | 6833     | 6643     | 62  |
| H(22A) | 2185     | 4430     | 5927     | 68  |
| H(22B) | 3123     | 5059     | 5737     | 68  |
| H(22E) | 2396     | 4308     | 5953     | 68  |
| H(22F) | 3089     | 5331     | 5685     | 68  |
| H(23A) | 157      | 7596     | 5275     | 133 |
| H(23B) | 259      | 6103     | 5641     | 133 |
| H(23C) | 919      | 7363     | 6097     | 133 |
| H(24A) | 2059     | 8742     | 4917     | 127 |
| H(24B) | 2780     | 8435     | 5742     | 127 |
| H(24C) | 3035     | 7759     | 5080     | 127 |
| H(25A) | 645      | 6436     | 4012     | 87  |
| H(25B) | 1657     | 5532     | 4156     | 87  |
| H(25C) | 725      | 4931     | 4362     | 87  |
| H(23D) | 257      | 4591     | 5567     | 154 |
| H(23E) | 461      | 5886     | 6106     | 154 |
| H(23F) | -337     | 6009     | 5287     | 154 |
| H(24D) | 1570     | 8363     | 5854     | 154 |
| H(24E) | 2022     | 8392     | 5207     | 154 |
| H(24F) | 812      | 8484     | 5023     | 154 |
| H(25D) | 1098     | 4548     | 4330     | 125 |
| H(25E) | 497      | 5941     | 4006     | 125 |
| H(25F) | 1707     | 5850     | 4190     | 125 |
| H(1Y)  | 6740(50) | -490(50) | 8290(30) | 74  |
| H(2Y1) | 5574     | 335      | 8750     | 71  |
| H(2Y2) | 5608     | 1769     | 8363     | 71  |
| H(3Y1) | 7261     | 716      | 9572     | 62  |
| H(3Y2) | 6474     | 1859     | 9638     | 62  |
| H(5Y)  | 8742     | 605      | 7535     | 70  |
| H(6Y)  | 10416    | 917      | 8359     | 72  |
| H(7Y)  | 10738    | 1785     | 9519     | 67  |
| H(9Y)  | 6543     | 2060     | 7610     | 65  |
| H(10Y) | 7095     | -453     | 7032     | 79  |
| H(12D) | 6296     | -920     | 5787     | 138 |
| H(12E) | 5529     | 144      | 5236     | 138 |
| H(12F) | 5125     | -842     | 5732     | 138 |
| H(13D) | 4607     | 1395     | 6356     | 114 |
| H(13E) | 4875     | 2134     | 5715     | 114 |
| H(13F) | 5441     | 2601     | 6545     | 114 |
| H(14D) | 10490    | 3948     | 10466    | 95  |
| H(14E) | 10643    | 2375     | 10725    | 95  |
| H(14F) | 9988     | 3390     | 11033    | 95  |
| H(15Y) | 6340(30) | 3960(60) | 8930(30) | 53  |
| H(21C) | 7767     | 4128     | 7734     | 63  |
| H(21D) | 6640     | 4771     | 7407     | 63  |
| H(22C) | 8447     | 6453     | 7833     | 73  |
| H(22D) | 7305     | 6986     | 7406     | 73  |
| H(23G) | 6475     | 4530     | 5902     | 142 |
| H(23H) | 6670     | 5712     | 5395     | 142 |

|        |      |      |      |     |
|--------|------|------|------|-----|
| H(23I) | 6148 | 6085 | 5981 | 142 |
| H(24G) | 8468 | 7332 | 5817 | 137 |
| H(24H) | 9237 | 7465 | 6644 | 137 |
| H(24I) | 8146 | 8215 | 6393 | 137 |
| H(25G) | 8408 | 3461 | 6664 | 106 |
| H(25H) | 9359 | 4362 | 7162 | 106 |
| H(25I) | 9085 | 4305 | 6296 | 106 |

---

**Crystal Structure of (-)-N8'-(Trimethylsilyl)ethanesulfonyl communesin A (42):**<sup>80</sup>

Structural parameters for (-)-N8'-(trimethylsilyl)ethanesulfonyl communesin A (**42**) are freely available from the Cambridge Crystallographic Data Center (CCDC 1937971).

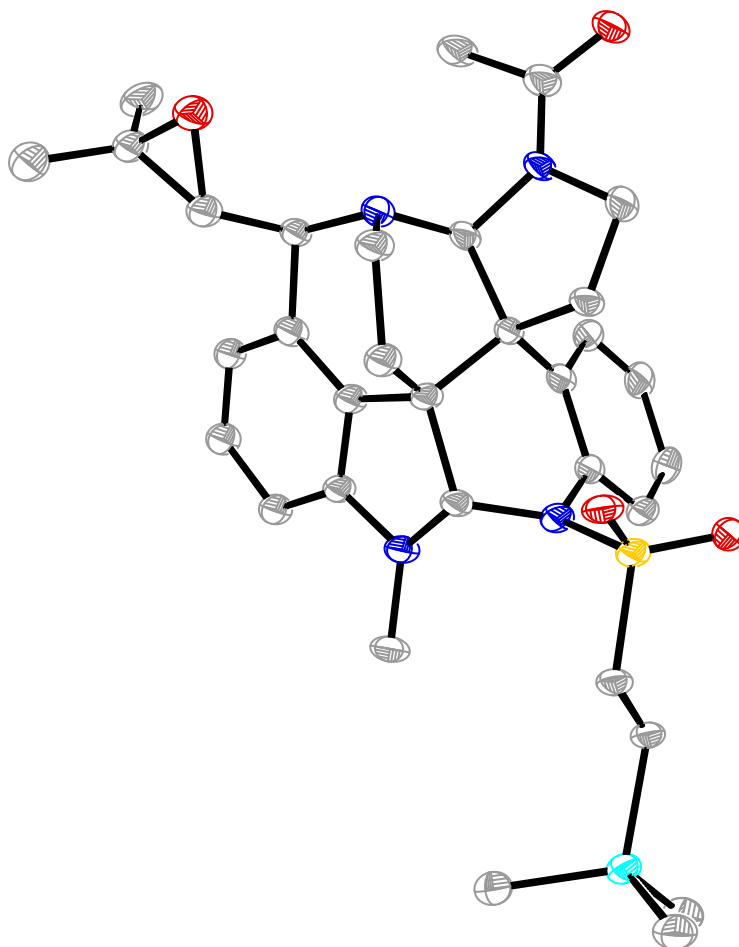

The data deposited at Cambridge Crystallographic Data Center (CCDC 1937971) includes the methanol molecule present in the lattice. The methanol molecule is disordered and has consequently been refined in two positions. The major position (~80%) is well resolved, but the minor position (~20%) is not as resolved since it contributes to a fraction of the diffraction data. As a result, the hydrogen atoms of this methanol molecule in the minor position are difficult to place and checkCIF may interpret them as too close to other atoms and results in the corresponding alerts. These alerts have been explained in the additional comments associated with the deposited data file. The disorder of the solvent methanol molecule has no impact on the alkaloid structure depicted above.

---

80. Solvent molecules (methanol) omitted for clarity.

**Table S21.** Crystal data and structure refinement for (-)-N<sup>8</sup>-(trimethylsilyl)ethanesulfonyl communesin A (**42**).

|                                   |                                                                    |                 |
|-----------------------------------|--------------------------------------------------------------------|-----------------|
| Identification code               | 5-68-12                                                            |                 |
| Empirical formula                 | C <sub>34</sub> H <sub>48</sub> N <sub>4</sub> O <sub>5</sub> S Si |                 |
| Formula weight                    | 652.91                                                             |                 |
| Temperature                       | 100(2) K                                                           |                 |
| Wavelength                        | 1.54178 Å                                                          |                 |
| Crystal system                    | Monoclinic                                                         |                 |
| Space group                       | P2 <sub>1</sub>                                                    |                 |
| Unit cell dimensions              | a = 7.9317(5) Å                                                    | α = 90°.        |
|                                   | b = 15.4939(11) Å                                                  | β = 92.123(4)°. |
|                                   | c = 13.8939(11) Å                                                  | γ = 90°.        |
| Volume                            | 1706.3(2) Å <sup>3</sup>                                           |                 |
| Z                                 | 2                                                                  |                 |
| Density (calculated)              | 1.271 Mg/m <sup>3</sup>                                            |                 |
| Absorption coefficient            | 1.552 mm <sup>-1</sup>                                             |                 |
| F(000)                            | 700                                                                |                 |
| Crystal size                      | 0.391 x 0.033 x 0.022 mm <sup>3</sup>                              |                 |
| Theta range for data collection   | 3.183 to 68.231°.                                                  |                 |
| Index ranges                      | -9 ≤ h ≤ 9, -18 ≤ k ≤ 15, -16 ≤ l ≤ 16                             |                 |
| Reflections collected             | 22916                                                              |                 |
| Independent reflections           | 5423 [R(int) = 0.0794]                                             |                 |
| Completeness to theta = 67.679°   | 99.6 %                                                             |                 |
| Absorption correction             | Semi-empirical from equivalents                                    |                 |
| Max. and min. transmission        | 0.7543 and 0.5696                                                  |                 |
| Refinement method                 | Full-matrix least-squares on F <sup>2</sup>                        |                 |
| Data / restraints / parameters    | 5423 / 3 / 437                                                     |                 |
| Goodness-of-fit on F <sup>2</sup> | 1.067                                                              |                 |
| Final R indices [I > 2σ(I)]       | R1 = 0.0665, wR2 = 0.1736                                          |                 |
| R indices (all data)              | R1 = 0.0794, wR2 = 0.1861                                          |                 |
| Absolute structure parameter      | 0.061(16)                                                          |                 |
| Extinction coefficient            | 0.0050(10)                                                         |                 |
| Largest diff. peak and hole       | 0.539 and -0.688 e.Å <sup>-3</sup>                                 |                 |

**Table S22.** Atomic coordinates ( $\times 10^4$ ) and equivalent isotropic displacement parameters ( $\text{\AA}^2 \times 10^3$ ) for (–)-N<sup>8</sup>-(trimethylsilyl)ethanesulfonyl communesin A (**42**). U(eq) is defined as one third of the trace of the orthogonalized  $U^{ij}$  tensor.

|        | x         | y        | z        | U(eq)   |
|--------|-----------|----------|----------|---------|
| S(1)   | 10083(2)  | 5338(1)  | 7881(1)  | 43(1)   |
| Si(1)  | 12162(2)  | 7697(1)  | 9423(2)  | 48(1)   |
| O(1)   | 2873(6)   | 4707(4)  | 3156(4)  | 54(1)   |
| O(2)   | 3550(6)   | 1961(3)  | 6332(4)  | 54(1)   |
| O(3)   | 10628(5)  | 5037(3)  | 6959(4)  | 46(1)   |
| O(4)   | 10145(5)  | 4765(3)  | 8681(4)  | 46(1)   |
| N(1)   | 4284(6)   | 4475(4)  | 5130(4)  | 42(1)   |
| C(2)   | 5984(8)   | 4568(5)  | 4733(6)  | 48(2)   |
| C(3)   | 7060(7)   | 5298(5)  | 5229(5)  | 47(2)   |
| C(3A)  | 6331(7)   | 5507(4)  | 6210(5)  | 40(2)   |
| C(4)   | 3355(7)   | 5994(5)  | 5484(5)  | 42(2)   |
| C(4A)  | 4821(7)   | 6089(5)  | 6058(5)  | 42(2)   |
| C(5)   | 2156(8)   | 6652(5)  | 5445(5)  | 45(2)   |
| C(6)   | 2449(8)   | 7412(5)  | 5927(6)  | 50(2)   |
| C(7)   | 3957(8)   | 7557(5)  | 6473(6)  | 48(2)   |
| C(7A)  | 5107(7)   | 6881(5)  | 6527(5)  | 42(2)   |
| N(8)   | 6657(6)   | 6873(4)  | 7029(5)  | 46(2)   |
| C(8)   | 7578(8)   | 7642(5)  | 7316(6)  | 53(2)   |
| C(8A)  | 7569(7)   | 6077(4)  | 6833(5)  | 42(2)   |
| C(9)   | 3086(7)   | 5170(4)  | 4891(5)  | 41(2)   |
| C(10)  | 3133(8)   | 5409(5)  | 3842(5)  | 49(2)   |
| C(11)  | 1675(8)   | 5400(6)  | 3141(5)  | 51(2)   |
| C(12)  | 1742(11)  | 5980(7)  | 2288(7)  | 67(2)   |
| C(13)  | -86(8)    | 5170(6)  | 3432(6)  | 60(2)   |
| N(1X)  | 4519(6)   | 3322(4)  | 6304(5)  | 44(1)   |
| C(2X)  | 6136(8)   | 3087(5)  | 6768(6)  | 49(2)   |
| C(3X)  | 7199(7)   | 3911(4)  | 6727(6)  | 42(2)   |
| C(3AX) | 5869(7)   | 4648(4)  | 6723(5)  | 38(1)   |
| C(4AX) | 5541(7)   | 4839(4)  | 7788(5)  | 39(2)   |
| C(4X)  | 4196(7)   | 4495(5)  | 8296(5)  | 46(2)   |
| C(5X)  | 4129(8)   | 4634(5)  | 9284(6)  | 51(2)   |
| C(6X)  | 5367(8)   | 5100(5)  | 9776(6)  | 51(2)   |
| C(7X)  | 6702(7)   | 5437(5)  | 9272(5)  | 46(2)   |
| C(7AX) | 6765(7)   | 5312(5)  | 8300(5)  | 42(1)   |
| C(8AX) | 4337(8)   | 4256(4)  | 6151(5)  | 42(2)   |
| N(8X)  | 8112(6)   | 5680(4)  | 7745(4)  | 41(1)   |
| C(1XX) | 3320(8)   | 2733(6)  | 6134(6)  | 52(2)   |
| C(2XX) | 1684(9)   | 3040(6)  | 5647(7)  | 65(2)   |
| C(20)  | 11272(7)  | 6287(5)  | 8167(5)  | 44(2)   |
| C(21)  | 10960(8)  | 6666(5)  | 9147(5)  | 45(2)   |
| C(22)  | 11866(11) | 7965(6)  | 10703(6) | 65(2)   |
| C(23)  | 11327(11) | 8578(6)  | 8637(7)  | 67(2)   |
| C(24)  | 14428(9)  | 7525(6)  | 9223(7)  | 60(2)   |
| O(30A) | 3556(18)  | 1440(9)  | 8188(8)  | 120(5)  |
| C(30A) | 2552(17)  | 2083(11) | 8550(9)  | 84(4)   |
| O(30B) | 4420(30)  | -433(17) | 7837(17) | 51(7)   |
| C(30B) | 4130(50)  | 440(30)  | 7820(30) | 100(20) |

**Table S23.** Bond lengths [Å] and angles [°] for  
 (–)-N8'-(trimethylsilyl)ethanesulfonyl communesin  
 A (**42**).

|              |           |                 |           |
|--------------|-----------|-----------------|-----------|
| S(1)-O(4)    | 1.421(5)  | C(13)-H(13C)    | 0.9800    |
| S(1)-O(3)    | 1.444(5)  | N(1X)-C(1XX)    | 1.333(9)  |
| S(1)-N(8X)   | 1.655(5)  | N(1X)-C(2X)     | 1.460(7)  |
| S(1)-C(20)   | 1.785(7)  | N(1X)-C(8AX)    | 1.468(9)  |
| Si(1)-C(24)  | 1.848(8)  | C(2X)-C(3X)     | 1.533(10) |
| Si(1)-C(22)  | 1.849(9)  | C(2X)-H(2X1)    | 0.9900    |
| Si(1)-C(23)  | 1.855(9)  | C(2X)-H(2X2)    | 0.9900    |
| Si(1)-C(21)  | 1.892(7)  | C(3X)-C(3AX)    | 1.555(9)  |
| O(1)-C(11)   | 1.433(9)  | C(3X)-H(3X1)    | 0.9900    |
| O(1)-C(10)   | 1.455(9)  | C(3X)-H(3X2)    | 0.9900    |
| O(2)-C(1XX)  | 1.239(10) | C(3AX)-C(4AX)   | 1.539(9)  |
| N(1)-C(8AX)  | 1.458(9)  | C(3AX)-C(8AX)   | 1.552(8)  |
| N(1)-C(9)    | 1.465(8)  | C(4AX)-C(7AX)   | 1.392(9)  |
| N(1)-C(2)    | 1.482(9)  | C(4AX)-C(4X)    | 1.406(9)  |
| C(2)-C(3)    | 1.562(10) | C(4X)-C(5X)     | 1.392(10) |
| C(2)-H(2A)   | 0.9900    | C(4X)-H(4X)     | 0.9500    |
| C(2)-H(2B)   | 0.9900    | C(5X)-C(6X)     | 1.380(10) |
| C(3)-C(3A)   | 1.535(10) | C(5X)-H(5X)     | 0.9500    |
| C(3)-H(3A)   | 0.9900    | C(6X)-C(7X)     | 1.392(10) |
| C(3)-H(3B)   | 0.9900    | C(6X)-H(6X)     | 0.9500    |
| C(3A)-C(4A)  | 1.509(8)  | C(7X)-C(7AX)    | 1.367(10) |
| C(3A)-C(8A)  | 1.559(8)  | C(7X)-H(7X)     | 0.9500    |
| C(3A)-C(3AX) | 1.560(9)  | C(7AX)-N(8X)    | 1.457(9)  |
| C(4)-C(5)    | 1.394(10) | C(8AX)-H(8AX)   | 1.0000    |
| C(4)-C(4A)   | 1.394(8)  | C(1XX)-C(2XX)   | 1.517(9)  |
| C(4)-C(9)    | 1.529(10) | C(2XX)-H(2X3)   | 0.9800    |
| C(4A)-C(7A)  | 1.403(10) | C(2XX)-H(2X4)   | 0.9800    |
| C(5)-C(6)    | 1.370(11) | C(2XX)-H(2X5)   | 0.9800    |
| C(5)-H(5)    | 0.9500    | C(20)-C(21)     | 1.511(10) |
| C(6)-C(7)    | 1.410(8)  | C(20)-H(20A)    | 0.9900    |
| C(6)-H(6)    | 0.9500    | C(20)-H(20B)    | 0.9900    |
| C(7)-C(7A)   | 1.389(10) | C(21)-H(21A)    | 0.9900    |
| C(7)-H(7)    | 0.9500    | C(21)-H(21B)    | 0.9900    |
| C(7A)-N(8)   | 1.391(7)  | C(22)-H(22A)    | 0.9800    |
| N(8)-C(8)    | 1.446(9)  | C(22)-H(22B)    | 0.9800    |
| N(8)-C(8A)   | 1.459(9)  | C(22)-H(22C)    | 0.9800    |
| C(8)-H(8A)   | 0.9800    | C(23)-H(23A)    | 0.9800    |
| C(8)-H(8B)   | 0.9800    | C(23)-H(23B)    | 0.9800    |
| C(8)-H(8C)   | 0.9800    | C(23)-H(23C)    | 0.9800    |
| C(8A)-N(8X)  | 1.459(9)  | C(24)-H(24A)    | 0.9800    |
| C(8A)-H(8A1) | 1.0000    | C(24)-H(24B)    | 0.9800    |
| C(9)-C(10)   | 1.506(10) | C(24)-H(24C)    | 0.9800    |
| C(9)-H(9)    | 1.0000    | O(30A)-C(30A)   | 1.382(18) |
| C(10)-C(11)  | 1.484(8)  | O(30A)-H(30A)   | 0.8400    |
| C(10)-H(10)  | 1.0000    | C(30A)-H(30B)   | 0.9800    |
| C(11)-C(12)  | 1.490(12) | C(30A)-H(30C)   | 0.9800    |
| C(11)-C(13)  | 1.512(10) | C(30A)-H(30D)   | 0.9800    |
| C(12)-H(12A) | 0.9800    | O(30B)-C(30B)   | 1.37(3)   |
| C(12)-H(12B) | 0.9800    | O(30B)-H(30E)   | 0.8400    |
| C(12)-H(12C) | 0.9800    | C(30B)-H(30F)   | 0.9800    |
| C(13)-H(13A) | 0.9800    | C(30B)-H(30G)   | 0.9800    |
| C(13)-H(13B) | 0.9800    | C(30B)-H(30H)   | 0.9800    |
|              |           | O(4)-S(1)-O(3)  | 119.3(3)  |
|              |           | O(4)-S(1)-N(8X) | 107.1(3)  |
|              |           | O(3)-S(1)-N(8X) | 108.4(3)  |
|              |           | O(4)-S(1)-C(20) | 109.7(3)  |



|                    |          |                      |          |
|--------------------|----------|----------------------|----------|
| O(3)-S(1)-C(20)    | 106.9(3) | H(8B)-C(8)-H(8C)     | 109.5    |
| N(8X)-S(1)-C(20)   | 104.5(3) | N(8X)-C(8A)-N(8)     | 109.1(6) |
| C(24)-Si(1)-C(22)  | 109.6(4) | N(8X)-C(8A)-C(3A)    | 113.7(5) |
| C(24)-Si(1)-C(23)  | 110.2(4) | N(8)-C(8A)-C(3A)     | 106.0(4) |
| C(22)-Si(1)-C(23)  | 110.2(5) | N(8X)-C(8A)-H(8A1)   | 109.3    |
| C(24)-Si(1)-C(21)  | 109.5(4) | N(8)-C(8A)-H(8A1)    | 109.3    |
| C(22)-Si(1)-C(21)  | 107.7(4) | C(3A)-C(8A)-H(8A1)   | 109.3    |
| C(23)-Si(1)-C(21)  | 109.6(3) | N(1)-C(9)-C(10)      | 111.1(6) |
| C(11)-O(1)-C(10)   | 61.8(4)  | N(1)-C(9)-C(4)       | 114.5(5) |
| C(8AX)-N(1)-C(9)   | 112.7(5) | C(10)-C(9)-C(4)      | 107.9(6) |
| C(8AX)-N(1)-C(2)   | 113.0(5) | N(1)-C(9)-H(9)       | 107.7    |
| C(9)-N(1)-C(2)     | 115.8(5) | C(10)-C(9)-H(9)      | 107.7    |
| N(1)-C(2)-C(3)     | 113.3(6) | C(4)-C(9)-H(9)       | 107.7    |
| N(1)-C(2)-H(2A)    | 108.9    | O(1)-C(10)-C(11)     | 58.3(5)  |
| C(3)-C(2)-H(2A)    | 108.9    | O(1)-C(10)-C(9)      | 116.2(6) |
| N(1)-C(2)-H(2B)    | 108.9    | C(11)-C(10)-C(9)     | 125.9(6) |
| C(3)-C(2)-H(2B)    | 108.9    | O(1)-C(10)-H(10)     | 114.6    |
| H(2A)-C(2)-H(2B)   | 107.7    | C(11)-C(10)-H(10)    | 114.6    |
| C(3A)-C(3)-C(2)    | 109.1(6) | C(9)-C(10)-H(10)     | 114.6    |
| C(3A)-C(3)-H(3A)   | 109.9    | O(1)-C(11)-C(10)     | 59.8(4)  |
| C(2)-C(3)-H(3A)    | 109.9    | O(1)-C(11)-C(12)     | 114.9(7) |
| C(3A)-C(3)-H(3B)   | 109.9    | C(10)-C(11)-C(12)    | 117.8(7) |
| C(2)-C(3)-H(3B)    | 109.9    | O(1)-C(11)-C(13)     | 116.0(7) |
| H(3A)-C(3)-H(3B)   | 108.3    | C(10)-C(11)-C(13)    | 122.1(7) |
| C(4A)-C(3A)-C(3)   | 109.0(5) | C(12)-C(11)-C(13)    | 114.6(6) |
| C(4A)-C(3A)-C(8A)  | 102.6(5) | C(11)-C(12)-H(12A)   | 109.5    |
| C(3)-C(3A)-C(8A)   | 111.3(5) | C(11)-C(12)-H(12B)   | 109.5    |
| C(4A)-C(3A)-C(3AX) | 112.0(5) | H(12A)-C(12)-H(12B)  | 109.5    |
| C(3)-C(3A)-C(3AX)  | 109.2(6) | C(11)-C(12)-H(12C)   | 109.5    |
| C(8A)-C(3A)-C(3AX) | 112.6(5) | H(12A)-C(12)-H(12C)  | 109.5    |
| C(5)-C(4)-C(4A)    | 119.8(7) | H(12B)-C(12)-H(12C)  | 109.5    |
| C(5)-C(4)-C(9)     | 120.6(5) | C(11)-C(13)-H(13A)   | 109.5    |
| C(4A)-C(4)-C(9)    | 119.6(6) | C(11)-C(13)-H(13B)   | 109.5    |
| C(4)-C(4A)-C(7A)   | 118.4(6) | H(13A)-C(13)-H(13B)  | 109.5    |
| C(4)-C(4A)-C(3A)   | 131.1(6) | C(11)-C(13)-H(13C)   | 109.5    |
| C(7A)-C(4A)-C(3A)  | 110.1(5) | H(13A)-C(13)-H(13C)  | 109.5    |
| C(6)-C(5)-C(4)     | 120.5(5) | H(13B)-C(13)-H(13C)  | 109.5    |
| C(6)-C(5)-H(5)     | 119.8    | C(1XX)-N(1X)-C(2X)   | 121.1(6) |
| C(4)-C(5)-H(5)     | 119.8    | C(1XX)-N(1X)-C(8AX)  | 125.7(5) |
| C(5)-C(6)-C(7)     | 121.6(7) | C(2X)-N(1X)-C(8AX)   | 112.9(5) |
| C(5)-C(6)-H(6)     | 119.2    | N(1X)-C(2X)-C(3X)    | 104.5(6) |
| C(7)-C(6)-H(6)     | 119.2    | N(1X)-C(2X)-H(2X1)   | 110.8    |
| C(7A)-C(7)-C(6)    | 116.8(7) | C(3X)-C(2X)-H(2X1)   | 110.8    |
| C(7A)-C(7)-H(7)    | 121.6    | N(1X)-C(2X)-H(2X2)   | 110.8    |
| C(6)-C(7)-H(7)     | 121.6    | C(3X)-C(2X)-H(2X2)   | 110.8    |
| C(7)-C(7A)-N(8)    | 126.9(6) | H(2X1)-C(2X)-H(2X2)  | 108.9    |
| C(7)-C(7A)-C(4A)   | 122.6(5) | C(2X)-C(3X)-C(3AX)   | 103.8(5) |
| N(8)-C(7A)-C(4A)   | 110.4(6) | C(2X)-C(3X)-H(3X1)   | 111.0    |
| C(7A)-N(8)-C(8)    | 124.0(6) | C(3AX)-C(3X)-H(3X1)  | 111.0    |
| C(7A)-N(8)-C(8A)   | 110.4(5) | C(2X)-C(3X)-H(3X2)   | 111.0    |
| C(8)-N(8)-C(8A)    | 119.9(5) | C(3AX)-C(3X)-H(3X2)  | 111.0    |
| N(8)-C(8)-H(8A)    | 109.5    | H(3X1)-C(3X)-H(3X2)  | 109.0    |
| N(8)-C(8)-H(8B)    | 109.5    | C(4AX)-C(3AX)-C(8AX) | 114.2(5) |
| H(8A)-C(8)-H(8B)   | 109.5    | C(4AX)-C(3AX)-C(3X)  | 106.0(5) |
| N(8)-C(8)-H(8C)    | 109.5    | C(8AX)-C(3AX)-C(3X)  | 103.4(5) |
| H(8A)-C(8)-H(8C)   | 109.5    | C(4AX)-C(3AX)-C(3A)  | 109.1(5) |

|                      |          |                      |          |
|----------------------|----------|----------------------|----------|
| C(8AX)-C(3AX)-C(3A)  | 107.1(5) | H(20A)-C(20)-H(20B)  | 107.6    |
| C(3X)-C(3AX)-C(3A)   | 117.2(5) | C(20)-C(21)-Si(1)    | 114.4(5) |
| C(7AX)-C(4AX)-C(4X)  | 118.0(6) | C(20)-C(21)-H(21A)   | 108.7    |
| C(7AX)-C(4AX)-C(3AX) | 117.0(5) | Si(1)-C(21)-H(21A)   | 108.7    |
| C(4X)-C(4AX)-C(3AX)  | 124.7(6) | C(20)-C(21)-H(21B)   | 108.7    |
| C(5X)-C(4X)-C(4AX)   | 119.6(6) | Si(1)-C(21)-H(21B)   | 108.7    |
| C(5X)-C(4X)-H(4X)    | 120.2    | H(21A)-C(21)-H(21B)  | 107.6    |
| C(4AX)-C(4X)-H(4X)   | 120.2    | Si(1)-C(22)-H(22A)   | 109.5    |
| C(6X)-C(5X)-C(4X)    | 121.1(7) | Si(1)-C(22)-H(22B)   | 109.5    |
| C(6X)-C(5X)-H(5X)    | 119.4    | H(22A)-C(22)-H(22B)  | 109.5    |
| C(4X)-C(5X)-H(5X)    | 119.4    | Si(1)-C(22)-H(22C)   | 109.5    |
| C(5X)-C(6X)-C(7X)    | 119.2(7) | H(22A)-C(22)-H(22C)  | 109.5    |
| C(5X)-C(6X)-H(6X)    | 120.4    | H(22B)-C(22)-H(22C)  | 109.5    |
| C(7X)-C(6X)-H(6X)    | 120.4    | Si(1)-C(23)-H(23A)   | 109.5    |
| C(7AX)-C(7X)-C(6X)   | 120.0(6) | Si(1)-C(23)-H(23B)   | 109.5    |
| C(7AX)-C(7X)-H(7X)   | 120.0    | H(23A)-C(23)-H(23B)  | 109.5    |
| C(6X)-C(7X)-H(7X)    | 120.0    | Si(1)-C(23)-H(23C)   | 109.5    |
| C(7X)-C(7AX)-C(4AX)  | 122.0(6) | H(23A)-C(23)-H(23C)  | 109.5    |
| C(7X)-C(7AX)-N(8X)   | 121.5(6) | H(23B)-C(23)-H(23C)  | 109.5    |
| C(4AX)-C(7AX)-N(8X)  | 116.5(6) | Si(1)-C(24)-H(24A)   | 109.5    |
| N(1)-C(8AX)-N(1X)    | 111.7(6) | Si(1)-C(24)-H(24B)   | 109.5    |
| N(1)-C(8AX)-C(3AX)   | 113.6(5) | H(24A)-C(24)-H(24B)  | 109.5    |
| N(1X)-C(8AX)-C(3AX)  | 104.0(5) | Si(1)-C(24)-H(24C)   | 109.5    |
| N(1)-C(8AX)-H(8AX)   | 109.1    | H(24A)-C(24)-H(24C)  | 109.5    |
| N(1X)-C(8AX)-H(8AX)  | 109.1    | H(24B)-C(24)-H(24C)  | 109.5    |
| C(3AX)-C(8AX)-H(8AX) | 109.1    | C(30A)-O(30A)-H(30A) | 109.5    |
| C(7AX)-N(8X)-C(8A)   | 115.2(4) | O(30A)-C(30A)-H(30B) | 109.5    |
| C(7AX)-N(8X)-S(1)    | 121.5(4) | O(30A)-C(30A)-H(30C) | 109.5    |
| C(8A)-N(8X)-S(1)     | 118.8(4) | H(30B)-C(30A)-H(30C) | 109.5    |
| O(2)-C(1XX)-N(1X)    | 121.5(6) | O(30A)-C(30A)-H(30D) | 109.5    |
| O(2)-C(1XX)-C(2XX)   | 121.2(7) | H(30B)-C(30A)-H(30D) | 109.5    |
| N(1X)-C(1XX)-C(2XX)  | 117.2(7) | H(30C)-C(30A)-H(30D) | 109.5    |
| C(1XX)-C(2XX)-H(2X3) | 109.5    | C(30B)-O(30B)-H(30E) | 109.5    |
| C(1XX)-C(2XX)-H(2X4) | 109.5    | O(30B)-C(30B)-H(30F) | 109.5    |
| H(2X3)-C(2XX)-H(2X4) | 109.5    | O(30B)-C(30B)-H(30G) | 109.5    |
| C(1XX)-C(2XX)-H(2X5) | 109.5    | H(30F)-C(30B)-H(30G) | 109.5    |
| H(2X3)-C(2XX)-H(2X5) | 109.5    | O(30B)-C(30B)-H(30H) | 109.5    |
| H(2X4)-C(2XX)-H(2X5) | 109.5    | H(30F)-C(30B)-H(30H) | 109.5    |
| C(21)-C(20)-S(1)     | 114.7(5) | H(30G)-C(30B)-H(30H) | 109.5    |
| C(21)-C(20)-H(20A)   | 108.6    |                      |          |
| S(1)-C(20)-H(20A)    | 108.6    |                      |          |
| C(21)-C(20)-H(20B)   | 108.6    |                      |          |
| S(1)-C(20)-H(20B)    | 108.6    |                      |          |

Symmetry transformations used to generate equivalent atoms:

**Table S24.** Anisotropic displacement parameters ( $\text{\AA}^2 \times 10^3$ ) for (-)-N8'-(trimethylsilyl)ethanesulfonyl communesin A (**42**). The anisotropic displacement factor exponent takes the form:  $-2\pi^2 [h^2 a^{*2} U^{11} + \dots + 2 h k a^* b^* U^{12}]$

|       | U <sup>11</sup> | U <sup>22</sup> | U <sup>33</sup> | U <sup>23</sup> | U <sup>13</sup> | U <sup>12</sup> |
|-------|-----------------|-----------------|-----------------|-----------------|-----------------|-----------------|
| S(1)  | 24(1)           | 31(1)           | 72(1)           | -1(1)           | -18(1)          | -1(1)           |
| Si(1) | 38(1)           | 36(1)           | 67(1)           | -2(1)           | -20(1)          | -1(1)           |
| O(1)  | 53(3)           | 40(3)           | 65(3)           | -6(3)           | -16(2)          | 5(2)            |

|        |         |         |        |        |         |         |
|--------|---------|---------|--------|--------|---------|---------|
| O(2)   | 48(3)   | 30(3)   | 84(3)  | 0(3)   | -18(2)  | -4(2)   |
| O(3)   | 34(2)   | 33(3)   | 70(3)  | -15(2) | -16(2)  | 0(2)    |
| O(4)   | 28(2)   | 37(3)   | 73(3)  | 8(2)   | -16(2)  | -2(2)   |
| N(1)   | 29(2)   | 29(3)   | 67(3)  | 2(3)   | -17(2)  | 2(2)    |
| C(2)   | 34(3)   | 35(4)   | 72(4)  | -5(3)  | -18(3)  | 2(3)    |
| C(3)   | 33(3)   | 38(4)   | 69(4)  | -1(4)  | -18(3)  | 1(3)    |
| C(3A)  | 28(2)   | 28(4)   | 61(4)  | -5(3)  | -19(2)  | 2(2)    |
| C(4)   | 26(3)   | 31(4)   | 68(4)  | 1(3)   | -12(3)  | 1(3)    |
| C(4A)  | 26(3)   | 34(4)   | 64(4)  | -1(3)  | -16(3)  | 1(3)    |
| C(5)   | 33(3)   | 34(4)   | 66(4)  | 3(3)   | -21(3)  | 4(3)    |
| C(6)   | 32(3)   | 40(4)   | 75(5)  | 2(4)   | -18(3)  | 3(3)    |
| C(7)   | 35(3)   | 35(4)   | 73(4)  | 2(3)   | -21(3)  | 2(3)    |
| C(7A)  | 30(3)   | 31(4)   | 63(4)  | 0(3)   | -19(3)  | -1(3)   |
| N(8)   | 31(3)   | 25(3)   | 82(4)  | -3(3)  | -23(2)  | 3(2)    |
| C(8)   | 41(3)   | 27(4)   | 89(5)  | -4(4)  | -19(3)  | -6(3)   |
| C(8A)  | 28(3)   | 25(4)   | 72(4)  | 2(3)   | -20(3)  | -2(2)   |
| C(9)   | 34(3)   | 27(4)   | 60(4)  | 2(3)   | -19(3)  | -1(3)   |
| C(10)  | 41(3)   | 35(4)   | 68(4)  | -2(4)  | -23(3)  | 3(3)    |
| C(11)  | 45(3)   | 41(4)   | 65(4)  | 0(4)   | -26(3)  | -2(3)   |
| C(12)  | 62(4)   | 58(6)   | 78(5)  | 5(5)   | -27(4)  | -6(4)   |
| C(13)  | 42(3)   | 66(6)   | 71(5)  | -9(4)  | -24(3)  | -7(4)   |
| N(1X)  | 34(3)   | 22(3)   | 76(4)  | 2(3)   | -21(2)  | 0(2)    |
| C(2X)  | 35(3)   | 35(4)   | 76(5)  | 6(4)   | -17(3)  | 2(3)    |
| C(3X)  | 32(3)   | 27(4)   | 68(4)  | -2(3)  | -15(3)  | -2(3)   |
| C(3AX) | 28(3)   | 24(3)   | 61(4)  | 3(3)   | -18(2)  | 0(2)    |
| C(4AX) | 23(2)   | 26(4)   | 67(4)  | 4(3)   | -13(2)  | 3(2)    |
| C(4X)  | 25(3)   | 42(4)   | 69(4)  | 10(3)  | -17(3)  | -4(3)   |
| C(5X)  | 30(3)   | 48(5)   | 74(5)  | 12(4)  | -12(3)  | 5(3)    |
| C(6X)  | 36(3)   | 53(5)   | 62(4)  | 5(4)   | -15(3)  | 9(3)    |
| C(7X)  | 30(3)   | 39(4)   | 68(4)  | 1(4)   | -18(3)  | -1(3)   |
| C(7AX) | 28(2)   | 29(3)   | 67(4)  | 5(3)   | -17(2)  | 1(3)    |
| C(8AX) | 31(3)   | 24(4)   | 69(4)  | 4(3)   | -18(3)  | 0(2)    |
| N(8X)  | 24(2)   | 37(3)   | 61(3)  | 2(3)   | -12(2)  | -5(2)   |
| C(1XX) | 41(3)   | 36(4)   | 78(5)  | -1(4)  | -15(3)  | -4(3)   |
| C(2XX) | 42(4)   | 38(4)   | 111(7) | -1(5)  | -34(4)  | -8(3)   |
| C(20)  | 29(3)   | 27(4)   | 75(4)  | -5(3)  | -18(3)  | -1(3)   |
| C(21)  | 35(3)   | 30(4)   | 68(4)  | -4(3)  | -20(3)  | -4(3)   |
| C(22)  | 70(5)   | 46(5)   | 79(5)  | -3(4)  | -16(4)  | -8(4)   |
| C(23)  | 68(5)   | 42(5)   | 87(6)  | 4(4)   | -35(4)  | -7(4)   |
| C(24)  | 54(4)   | 41(5)   | 83(5)  | -7(4)  | -15(4)  | -5(4)   |
| O(30A) | 148(11) | 105(10) | 105(7) | 34(8)  | -15(7)  | 49(8)   |
| C(30A) | 85(8)   | 93(12)  | 72(7)  | 20(7)  | -17(6)  | -18(8)  |
| O(30B) | 55(13)  | 40(16)  | 57(14) | 2(11)  | -10(10) | -15(11) |
| C(30B) | 42(18)  | 170(70) | 80(30) | 40(40) | 18(17)  | -40(30) |

**Table S25.** Hydrogen coordinates ( $\times 10^4$ ) and isotropic displacement parameters ( $\text{\AA}^2 \times 10^3$ ) for (-)-N8'-(trimethylsilyl)ethanesulfonyl communesin A (**42**).

|       | x    | y    | z    | U(eq) |
|-------|------|------|------|-------|
| H(2A) | 5860 | 4693 | 4035 | 57    |
| H(2B) | 6594 | 4013 | 4809 | 57    |

|        |       |      |       |     |
|--------|-------|------|-------|-----|
| H(3A)  | 8247  | 5106 | 5318  | 56  |
| H(3B)  | 7038  | 5820 | 4819  | 56  |
| H(5)   | 1130  | 6574 | 5081  | 54  |
| H(6)   | 1615  | 7852 | 5894  | 60  |
| H(7)   | 4177  | 8091 | 6788  | 58  |
| H(8A)  | 8508  | 7733 | 6882  | 79  |
| H(8B)  | 8031  | 7573 | 7977  | 79  |
| H(8C)  | 6817  | 8140 | 7283  | 79  |
| H(8A1) | 8582  | 6215 | 6454  | 51  |
| H(9)   | 1928  | 4950 | 5013  | 49  |
| H(10)  | 4053  | 5820 | 3682  | 58  |
| H(12A) | 2918  | 6130 | 2174  | 100 |
| H(12B) | 1102  | 6508 | 2409  | 100 |
| H(12C) | 1250  | 5685 | 1720  | 100 |
| H(13A) | -723  | 4928 | 2877  | 91  |
| H(13B) | -657  | 5689 | 3657  | 91  |
| H(13C) | -22   | 4742 | 3952  | 91  |
| H(2X1) | 6674  | 2610 | 6417  | 59  |
| H(2X2) | 5988  | 2906 | 7443  | 59  |
| H(3X1) | 7857  | 3926 | 6135  | 51  |
| H(3X2) | 7984  | 3955 | 7296  | 51  |
| H(4X)  | 3338  | 4170 | 7967  | 55  |
| H(5X)  | 3216  | 4403 | 9625  | 61  |
| H(6X)  | 5309  | 5191 | 10450 | 61  |
| H(7X)  | 7570  | 5753 | 9604  | 55  |
| H(8AX) | 3272  | 4456 | 6443  | 50  |
| H(2X3) | 1903  | 3238 | 4994  | 97  |
| H(2X4) | 1221  | 3517 | 6018  | 97  |
| H(2X5) | 872   | 2563 | 5616  | 97  |
| H(20A) | 12487 | 6149 | 8134  | 53  |
| H(20B) | 11005 | 6731 | 7672  | 53  |
| H(21A) | 11273 | 6232 | 9645  | 54  |
| H(21B) | 9738  | 6784 | 9190  | 54  |
| H(22A) | 12400 | 8521 | 10853 | 98  |
| H(22B) | 12384 | 7515 | 11112 | 98  |
| H(22C) | 10658 | 7999 | 10821 | 98  |
| H(23A) | 10175 | 8720 | 8815  | 100 |
| H(23B) | 11319 | 8390 | 7964  | 100 |
| H(23C) | 12045 | 9089 | 8719  | 100 |
| H(24A) | 14560 | 7254 | 8593  | 90  |
| H(24B) | 14910 | 7149 | 9728  | 90  |
| H(24C) | 15015 | 8082 | 9240  | 90  |
| H(30A) | 3561  | 1480 | 7585  | 180 |
| H(30B) | 3268  | 2533 | 8846  | 125 |
| H(30C) | 1824  | 1839 | 9035  | 125 |
| H(30D) | 1852  | 2334 | 8025  | 125 |
| H(30E) | 4421  | -621 | 7270  | 76  |
| H(30F) | 3521  | 607  | 8397  | 145 |
| H(30G) | 3447  | 592  | 7244  | 145 |
| H(30H) | 5207  | 749  | 7819  | 145 |

---

**Crystal Structure of (-)-N8'-(Trimethylsilyl)ethanesulfonyl communesin B (45):**

Structural parameters for (-)-N8'-(trimethylsilyl)ethanesulfonyl communesin B (45) are freely available from the Cambridge Crystallographic Data Center (CCDC 1937972).

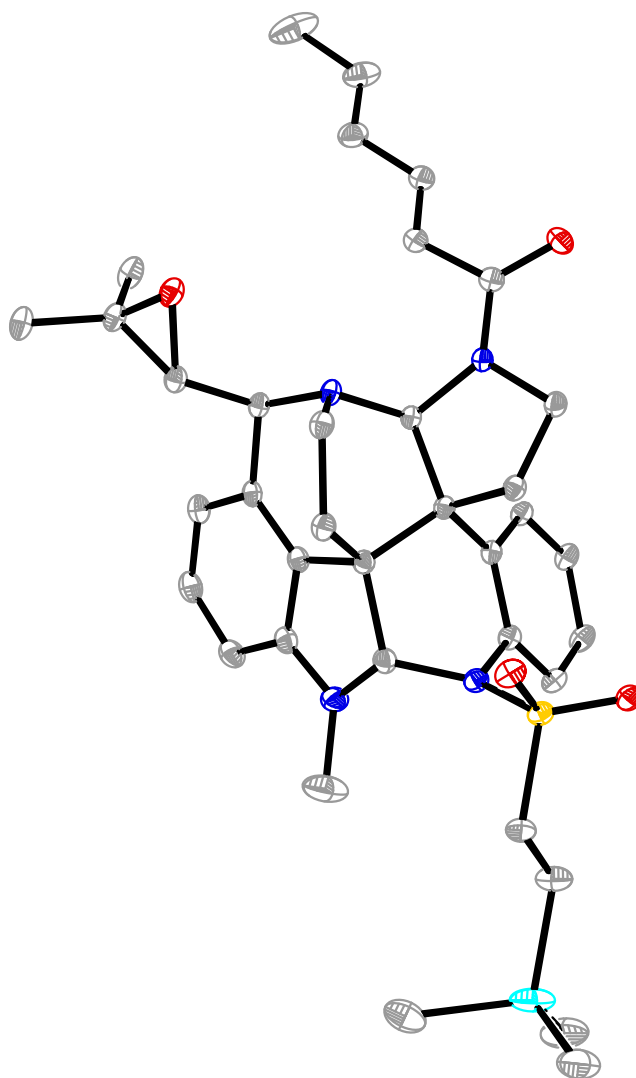

**Table S26.** Crystal data and structure refinement for (-)-N<sup>8</sup>-(trimethylsilyl)ethanesulfonyl communesin B (**45**).

|                                   |                                                                    |          |
|-----------------------------------|--------------------------------------------------------------------|----------|
| Identification code               | 3-264_7_sq                                                         |          |
| Empirical formula                 | C <sub>37</sub> H <sub>48</sub> N <sub>4</sub> O <sub>4</sub> S Si |          |
| Formula weight                    | 672.94                                                             |          |
| Temperature                       | 100(2) K                                                           |          |
| Wavelength                        | 1.54178 Å                                                          |          |
| Crystal system                    | Orthorhombic                                                       |          |
| Space group                       | P2 <sub>1</sub> 2 <sub>1</sub> 2 <sub>1</sub>                      |          |
| Unit cell dimensions              | a = 7.86180(10) Å                                                  | α = 90°. |
|                                   | b = 17.7249(3) Å                                                   | β = 90°. |
|                                   | c = 27.6554(5) Å                                                   | γ = 90°. |
| Volume                            | 3853.77(11) Å <sup>3</sup>                                         |          |
| Z                                 | 4                                                                  |          |
| Density (calculated)              | 1.160 Mg/m <sup>3</sup>                                            |          |
| Absorption coefficient            | 1.371 mm <sup>-1</sup>                                             |          |
| F(000)                            | 1440                                                               |          |
| Crystal size                      | 0.250 x 0.035 x 0.025 mm <sup>3</sup>                              |          |
| Theta range for data collection   | 2.961 to 77.367°.                                                  |          |
| Index ranges                      | -9 ≤ h ≤ 9, -22 ≤ k ≤ 22, -34 ≤ l ≤ 35                             |          |
| Reflections collected             | 134233                                                             |          |
| Independent reflections           | 8171 [R(int) = 0.0599]                                             |          |
| Completeness to theta = 67.679°   | 100.0 %                                                            |          |
| Absorption correction             | Semi-empirical from equivalents                                    |          |
| Max. and min. transmission        | 0.7543 and 0.6759                                                  |          |
| Refinement method                 | Full-matrix least-squares on F <sup>2</sup>                        |          |
| Data / restraints / parameters    | 8171 / 504 / 462                                                   |          |
| Goodness-of-fit on F <sup>2</sup> | 1.061                                                              |          |
| Final R indices [I > 2σ(I)]       | R1 = 0.0312, wR2 = 0.0827                                          |          |
| R indices (all data)              | R1 = 0.0332, wR2 = 0.0843                                          |          |
| Absolute structure parameter      | 0.007(4)                                                           |          |
| Extinction coefficient            | n/a                                                                |          |
| Largest diff. peak and hole       | 0.274 and -0.261 e.Å <sup>-3</sup>                                 |          |

**Table S27.** Atomic coordinates ( $\times 10^4$ ) and equivalent isotropic displacement parameters ( $\text{\AA}^2 \times 10^3$ ) for (–)-N8'-(trimethylsilyl)ethanesulfonyl communesin B (**45**). U(eq) is defined as one third of the trace of the orthogonalized  $U^{ij}$  tensor.

|        | x         | y        | z        | U(eq)  |
|--------|-----------|----------|----------|--------|
| S(1)   | 1285(1)   | 6297(1)  | 3988(1)  | 22(1)  |
| Si(1)  | -531(1)   | 5293(1)  | 5400(1)  | 49(1)  |
| O(1)   | 8057(2)   | 4859(1)  | 1732(1)  | 28(1)  |
| O(2)   | 7464(2)   | 8209(1)  | 2311(1)  | 39(1)  |
| O(3)   | 618(2)    | 6134(1)  | 3516(1)  | 28(1)  |
| O(4)   | 1355(2)   | 7064(1)  | 4150(1)  | 25(1)  |
| N(1)   | 6753(2)   | 5801(1)  | 2514(1)  | 21(1)  |
| C(2)   | 5025(3)   | 5563(1)  | 2389(1)  | 24(1)  |
| C(3)   | 4009(3)   | 5230(1)  | 2817(1)  | 24(1)  |
| C(3A)  | 4855(3)   | 5473(1)  | 3293(1)  | 21(1)  |
| C(4)   | 7837(3)   | 4850(1)  | 3111(1)  | 23(1)  |
| C(4A)  | 6418(3)   | 4985(1)  | 3394(1)  | 22(1)  |
| C(5)   | 9109(3)   | 4366(1)  | 3288(1)  | 29(1)  |
| C(6)   | 8910(3)   | 4014(1)  | 3731(1)  | 33(1)  |
| C(7)   | 7449(3)   | 4117(1)  | 4010(1)  | 32(1)  |
| C(7A)  | 6219(3)   | 4607(1)  | 3836(1)  | 26(1)  |
| N(8)   | 4670(3)   | 4783(1)  | 4043(1)  | 34(1)  |
| C(8)   | 3907(4)   | 4393(2)  | 4437(1)  | 61(1)  |
| C(8A)  | 3700(3)   | 5295(1)  | 3739(1)  | 25(1)  |
| C(9)   | 8007(3)   | 5206(1)  | 2615(1)  | 22(1)  |
| C(10)  | 7895(3)   | 4603(1)  | 2225(1)  | 25(1)  |
| C(11)  | 9310(3)   | 4333(1)  | 1921(1)  | 27(1)  |
| C(12)  | 9181(3)   | 3553(1)  | 1706(1)  | 35(1)  |
| C(13)  | 11081(3)  | 4640(2)  | 1958(1)  | 35(1)  |
| N(1X)  | 6524(2)   | 7148(1)  | 2670(1)  | 23(1)  |
| C(1X)  | 5018(3)   | 7530(1)  | 2865(1)  | 25(1)  |
| C(2X)  | 3961(3)   | 6885(1)  | 3071(1)  | 22(1)  |
| C(3AX) | 5347(2)   | 6328(1)  | 3264(1)  | 20(1)  |
| C(4AX) | 5813(2)   | 6615(1)  | 3764(1)  | 20(1)  |
| C(4X)  | 7191(3)   | 7078(1)  | 3866(1)  | 23(1)  |
| C(5X)  | 7439(3)   | 7363(1)  | 4331(1)  | 27(1)  |
| C(6X)  | 6320(3)   | 7178(1)  | 4700(1)  | 28(1)  |
| C(7X)  | 4921(3)   | 6718(1)  | 4603(1)  | 25(1)  |
| C(7AX) | 4672(3)   | 6450(1)  | 4138(1)  | 22(1)  |
| C(8AX) | 6795(3)   | 6394(1)  | 2881(1)  | 20(1)  |
| N(8X)  | 3256(2)   | 5968(1)  | 4025(1)  | 23(1)  |
| C(1XX) | 7660(3)   | 7532(1)  | 2398(1)  | 28(1)  |
| C(2XX) | 9099(3)   | 7093(1)  | 2195(1)  | 29(1)  |
| C(3XX) | 10538(3)  | 7422(1)  | 2052(1)  | 32(1)  |
| C(4XX) | 11934(3)  | 7039(2)  | 1815(1)  | 37(1)  |
| C(5XX) | 13340(4)  | 7385(2)  | 1666(1)  | 45(1)  |
| C(6XX) | 14755(4)  | 7005(3)  | 1395(1)  | 72(1)  |
| C(20)  | 99(3)     | 5740(1)  | 4405(1)  | 28(1)  |
| C(21)  | 573(4)    | 5885(2)  | 4929(1)  | 38(1)  |
| C(22A) | -103(17)  | 4226(7)  | 5238(4)  | 53(2)  |
| C(23A) | -2800(30) | 5384(13) | 5363(9)  | 58(3)  |
| C(24A) | 407(16)   | 5489(12) | 5974(3)  | 62(3)  |
| C(22B) | 160(40)   | 4401(14) | 5381(15) | 103(8) |
| C(23B) | -2950(30) | 5480(20) | 5406(12) | 62(7)  |
| C(24B) | 120(20)   | 5873(19) | 6013(6)  | 67(5)  |

**Table S28.** Bond lengths [Å] and angles [°] for (–)-N8'-(trimethylsilyl)ethanesulfonyl communesin B (**45**).

|              |            |               |          |
|--------------|------------|---------------|----------|
| S(1)-O(4)    | 1.4328(15) | C(12)-H(12C)  | 0.9800   |
| S(1)-O(3)    | 1.4358(16) | C(13)-H(13A)  | 0.9800   |
| S(1)-N(8X)   | 1.6584(18) | C(13)-H(13B)  | 0.9800   |
| S(1)-C(20)   | 1.782(2)   | C(13)-H(13C)  | 0.9800   |
| Si(1)-C(22B) | 1.67(2)    | N(1X)-C(1XX)  | 1.350(3) |
| Si(1)-C(24A) | 1.784(8)   | N(1X)-C(1X)   | 1.467(3) |
| Si(1)-C(23A) | 1.80(2)    | N(1X)-C(8AX)  | 1.474(2) |
| Si(1)-C(21)  | 1.884(3)   | C(1X)-C(2X)   | 1.523(3) |
| Si(1)-C(23B) | 1.93(2)    | C(1X)-H(1X1)  | 0.9900   |
| Si(1)-C(22A) | 1.972(12)  | C(1X)-H(1X2)  | 0.9900   |
| Si(1)-C(24B) | 2.05(3)    | C(2X)-C(3AX)  | 1.565(3) |
| O(1)-C(10)   | 1.442(3)   | C(2X)-H(2X1)  | 0.9900   |
| O(1)-C(11)   | 1.453(3)   | C(2X)-H(2X2)  | 0.9900   |
| O(2)-C(1XX)  | 1.234(3)   | C(3AX)-C(4AX) | 1.519(3) |
| N(1)-C(8AX)  | 1.461(2)   | C(3AX)-C(8AX) | 1.558(3) |
| N(1)-C(2)    | 1.464(3)   | C(4AX)-C(4X)  | 1.387(3) |
| N(1)-C(9)    | 1.470(3)   | C(4AX)-C(7AX) | 1.400(3) |
| C(2)-C(3)    | 1.544(3)   | C(4X)-C(5X)   | 1.395(3) |
| C(2)-H(2A)   | 0.9900     | C(4X)-H(4X)   | 0.9500   |
| C(2)-H(2B)   | 0.9900     | C(5X)-C(6X)   | 1.387(3) |
| C(3)-C(3A)   | 1.538(3)   | C(5X)-H(5X)   | 0.9500   |
| C(3)-H(3A)   | 0.9900     | C(6X)-C(7X)   | 1.396(3) |
| C(3)-H(3B)   | 0.9900     | C(6X)-H(6X)   | 0.9500   |
| C(3A)-C(4A)  | 1.528(3)   | C(7X)-C(7AX)  | 1.384(3) |
| C(3A)-C(8A)  | 1.562(3)   | C(7X)-H(7X)   | 0.9500   |
| C(3A)-C(3AX) | 1.567(3)   | C(7AX)-N(8X)  | 1.439(3) |
| C(4)-C(4A)   | 1.382(3)   | C(8AX)-H(8AX) | 1.0000   |
| C(4)-C(5)    | 1.406(3)   | C(1XX)-C(2XX) | 1.483(3) |
| C(4)-C(9)    | 1.517(3)   | C(2XX)-C(3XX) | 1.333(3) |
| C(4A)-C(7A)  | 1.402(3)   | C(2XX)-H(2XX) | 0.9500   |
| C(5)-C(6)    | 1.384(3)   | C(3XX)-C(4XX) | 1.447(3) |
| C(5)-H(5)    | 0.9500     | C(3XX)-H(3XX) | 0.9500   |
| C(6)-C(7)    | 1.396(4)   | C(4XX)-C(5XX) | 1.330(4) |
| C(6)-H(6)    | 0.9500     | C(4XX)-H(4XX) | 0.9500   |
| C(7)-C(7A)   | 1.386(3)   | C(5XX)-C(6XX) | 1.500(4) |
| C(7)-H(7)    | 0.9500     | C(5XX)-H(5XX) | 0.9500   |
| C(7A)-N(8)   | 1.382(3)   | C(6XX)-H(6X1) | 0.9800   |
| N(8)-C(8)    | 1.422(3)   | C(6XX)-H(6X2) | 0.9800   |
| N(8)-C(8A)   | 1.455(3)   | C(6XX)-H(6X3) | 0.9800   |
| C(8)-H(8A)   | 0.9800     | C(20)-C(21)   | 1.518(3) |
| C(8)-H(8B)   | 0.9800     | C(20)-H(20A)  | 0.9900   |
| C(8)-H(8C)   | 0.9800     | C(20)-H(20B)  | 0.9900   |
| C(8A)-N(8X)  | 1.472(3)   | C(21)-H(21A)  | 0.9900   |
| C(8A)-H(8A1) | 1.0000     | C(21)-H(21B)  | 0.9900   |
| C(9)-C(10)   | 1.520(3)   | C(22A)-H(22A) | 0.9800   |
| C(9)-H(9)    | 1.0000     | C(22A)-H(22B) | 0.9800   |
| C(10)-C(11)  | 1.474(3)   | C(22A)-H(22C) | 0.9800   |
| C(10)-H(10)  | 1.0000     | C(23A)-H(23A) | 0.9800   |
| C(11)-C(13)  | 1.499(3)   | C(23A)-H(23B) | 0.9800   |
| C(11)-C(12)  | 1.508(3)   | C(23A)-H(23C) | 0.9800   |
| C(12)-H(12A) | 0.9800     | C(24A)-H(24A) | 0.9800   |
| C(12)-H(12B) | 0.9800     | C(24A)-H(24B) | 0.9800   |
|              |            | C(24A)-H(24C) | 0.9800   |
|              |            | C(22B)-H(22D) | 0.9800   |
|              |            | C(22B)-H(22E) | 0.9800   |
|              |            | C(22B)-H(22F) | 0.9800   |



|                     |            |                     |            |
|---------------------|------------|---------------------|------------|
| C(23B)-H(23D)       | 0.9800     | C(5)-C(6)-C(7)      | 121.6(2)   |
| C(23B)-H(23E)       | 0.9800     | C(5)-C(6)-H(6)      | 119.2      |
| C(23B)-H(23F)       | 0.9800     | C(7)-C(6)-H(6)      | 119.2      |
| C(24B)-H(24D)       | 0.9800     | C(7A)-C(7)-C(6)     | 117.5(2)   |
| C(24B)-H(24E)       | 0.9800     | C(7A)-C(7)-H(7)     | 121.2      |
| C(24B)-H(24F)       | 0.9800     | C(6)-C(7)-H(7)      | 121.2      |
|                     |            | N(8)-C(7A)-C(7)     | 127.7(2)   |
| O(4)-S(1)-O(3)      | 119.31(9)  | N(8)-C(7A)-C(4A)    | 110.64(19) |
| O(4)-S(1)-N(8X)     | 106.18(9)  | C(7)-C(7A)-C(4A)    | 121.7(2)   |
| O(3)-S(1)-N(8X)     | 109.03(9)  | C(7A)-N(8)-C(8)     | 125.4(2)   |
| O(4)-S(1)-C(20)     | 110.09(10) | C(7A)-N(8)-C(8A)    | 111.26(18) |
| O(3)-S(1)-C(20)     | 106.61(10) | C(8)-N(8)-C(8A)     | 121.7(2)   |
| N(8X)-S(1)-C(20)    | 104.73(10) | N(8)-C(8)-H(8A)     | 109.5      |
| C(24A)-Si(1)-C(23A) | 116.3(10)  | N(8)-C(8)-H(8B)     | 109.5      |
| C(22B)-Si(1)-C(21)  | 110.8(9)   | H(8A)-C(8)-H(8B)    | 109.5      |
| C(24A)-Si(1)-C(21)  | 108.4(4)   | N(8)-C(8)-H(8C)     | 109.5      |
| C(23A)-Si(1)-C(21)  | 111.6(7)   | H(8A)-C(8)-H(8C)    | 109.5      |
| C(22B)-Si(1)-C(23B) | 118.7(19)  | H(8B)-C(8)-H(8C)    | 109.5      |
| C(21)-Si(1)-C(23B)  | 111.5(10)  | N(8)-C(8A)-N(8X)    | 108.57(17) |
| C(24A)-Si(1)-C(22A) | 108.6(7)   | N(8)-C(8A)-C(3A)    | 106.09(18) |
| C(23A)-Si(1)-C(22A) | 104.1(9)   | N(8X)-C(8A)-C(3A)   | 113.50(16) |
| C(21)-Si(1)-C(22A)  | 107.3(4)   | N(8)-C(8A)-H(8A1)   | 109.5      |
| C(22B)-Si(1)-C(24B) | 114.8(12)  | N(8X)-C(8A)-H(8A1)  | 109.5      |
| C(21)-Si(1)-C(24B)  | 100.2(4)   | C(3A)-C(8A)-H(8A1)  | 109.5      |
| C(23B)-Si(1)-C(24B) | 98.9(15)   | N(1)-C(9)-C(4)      | 114.20(17) |
| C(10)-O(1)-C(11)    | 61.22(13)  | N(1)-C(9)-C(10)     | 109.37(16) |
| C(8AX)-N(1)-C(2)    | 113.07(15) | C(4)-C(9)-C(10)     | 110.20(17) |
| C(8AX)-N(1)-C(9)    | 111.72(15) | N(1)-C(9)-H(9)      | 107.6      |
| C(2)-N(1)-C(9)      | 117.41(16) | C(4)-C(9)-H(9)      | 107.6      |
| N(1)-C(2)-C(3)      | 114.14(16) | C(10)-C(9)-H(9)     | 107.6      |
| N(1)-C(2)-H(2A)     | 108.7      | O(1)-C(10)-C(11)    | 59.77(14)  |
| C(3)-C(2)-H(2A)     | 108.7      | O(1)-C(10)-C(9)     | 116.38(17) |
| N(1)-C(2)-H(2B)     | 108.7      | C(11)-C(10)-C(9)    | 126.13(19) |
| C(3)-C(2)-H(2B)     | 108.7      | O(1)-C(10)-H(10)    | 114.3      |
| H(2A)-C(2)-H(2B)    | 107.6      | C(11)-C(10)-H(10)   | 114.3      |
| C(3A)-C(3)-C(2)     | 109.00(16) | C(9)-C(10)-H(10)    | 114.3      |
| C(3A)-C(3)-H(3A)    | 109.9      | O(1)-C(11)-C(10)    | 59.00(13)  |
| C(2)-C(3)-H(3A)     | 109.9      | O(1)-C(11)-C(13)    | 114.91(19) |
| C(3A)-C(3)-H(3B)    | 109.9      | C(10)-C(11)-C(13)   | 122.87(19) |
| C(2)-C(3)-H(3B)     | 109.9      | O(1)-C(11)-C(12)    | 113.69(18) |
| H(3A)-C(3)-H(3B)    | 108.3      | C(10)-C(11)-C(12)   | 118.2(2)   |
| C(4A)-C(3A)-C(3)    | 110.21(16) | C(13)-C(11)-C(12)   | 115.01(19) |
| C(4A)-C(3A)-C(8A)   | 102.14(16) | C(11)-C(12)-H(12A)  | 109.5      |
| C(3)-C(3A)-C(8A)    | 111.57(17) | C(11)-C(12)-H(12B)  | 109.5      |
| C(4A)-C(3A)-C(3AX)  | 111.04(16) | H(12A)-C(12)-H(12B) | 109.5      |
| C(3)-C(3A)-C(3AX)   | 109.42(16) | C(11)-C(12)-H(12C)  | 109.5      |
| C(8A)-C(3A)-C(3AX)  | 112.29(16) | H(12A)-C(12)-H(12C) | 109.5      |
| C(4A)-C(4)-C(5)     | 118.8(2)   | H(12B)-C(12)-H(12C) | 109.5      |
| C(4A)-C(4)-C(9)     | 120.74(18) | C(11)-C(13)-H(13A)  | 109.5      |
| C(5)-C(4)-C(9)      | 120.40(19) | C(11)-C(13)-H(13B)  | 109.5      |
| C(4)-C(4A)-C(7A)    | 120.03(19) | H(13A)-C(13)-H(13B) | 109.5      |
| C(4)-C(4A)-C(3A)    | 130.05(18) | C(11)-C(13)-H(13C)  | 109.5      |
| C(7A)-C(4A)-C(3A)   | 109.81(18) | H(13A)-C(13)-H(13C) | 109.5      |
| C(6)-C(5)-C(4)      | 120.2(2)   | H(13B)-C(13)-H(13C) | 109.5      |
| C(6)-C(5)-H(5)      | 119.9      | C(1XX)-N(1X)-C(1X)  | 120.37(17) |
| C(4)-C(5)-H(5)      | 119.9      | C(1XX)-N(1X)-C(8AX) | 125.58(17) |

|                      |            |                      |            |
|----------------------|------------|----------------------|------------|
| C(1X)-N(1X)-C(8AX)   | 112.87(16) | C(5XX)-C(4XX)-H(4XX) | 118.2      |
| N(1X)-C(1X)-C(2X)    | 103.38(16) | C(3XX)-C(4XX)-H(4XX) | 118.2      |
| N(1X)-C(1X)-H(1X1)   | 111.1      | C(4XX)-C(5XX)-C(6XX) | 124.4(3)   |
| C(2X)-C(1X)-H(1X1)   | 111.1      | C(4XX)-C(5XX)-H(5XX) | 117.8      |
| N(1X)-C(1X)-H(1X2)   | 111.1      | C(6XX)-C(5XX)-H(5XX) | 117.8      |
| C(2X)-C(1X)-H(1X2)   | 111.1      | C(5XX)-C(6XX)-H(6X1) | 109.5      |
| H(1X1)-C(1X)-H(1X2)  | 109.1      | C(5XX)-C(6XX)-H(6X2) | 109.5      |
| C(1X)-C(2X)-C(3AX)   | 102.74(16) | H(6X1)-C(6XX)-H(6X2) | 109.5      |
| C(1X)-C(2X)-H(2X1)   | 111.2      | C(5XX)-C(6XX)-H(6X3) | 109.5      |
| C(3AX)-C(2X)-H(2X1)  | 111.2      | H(6X1)-C(6XX)-H(6X3) | 109.5      |
| C(1X)-C(2X)-H(2X2)   | 111.2      | H(6X2)-C(6XX)-H(6X3) | 109.5      |
| C(3AX)-C(2X)-H(2X2)  | 111.2      | C(21)-C(20)-S(1)     | 113.34(16) |
| H(2X1)-C(2X)-H(2X2)  | 109.1      | C(21)-C(20)-H(20A)   | 108.9      |
| C(4AX)-C(3AX)-C(8AX) | 114.65(16) | S(1)-C(20)-H(20A)    | 108.9      |
| C(4AX)-C(3AX)-C(2X)  | 105.51(15) | C(21)-C(20)-H(20B)   | 108.9      |
| C(8AX)-C(3AX)-C(2X)  | 103.30(15) | S(1)-C(20)-H(20B)    | 108.9      |
| C(4AX)-C(3AX)-C(3A)  | 109.65(16) | H(20A)-C(20)-H(20B)  | 107.7      |
| C(8AX)-C(3AX)-C(3A)  | 106.72(15) | C(20)-C(21)-Si(1)    | 116.93(17) |
| C(2X)-C(3AX)-C(3A)   | 117.17(16) | C(20)-C(21)-H(21A)   | 108.1      |
| C(4X)-C(4AX)-C(7AX)  | 118.31(18) | Si(1)-C(21)-H(21A)   | 108.1      |
| C(4X)-C(4AX)-C(3AX)  | 124.83(18) | C(20)-C(21)-H(21B)   | 108.1      |
| C(7AX)-C(4AX)-C(3AX) | 116.62(17) | Si(1)-C(21)-H(21B)   | 108.1      |
| C(4AX)-C(4X)-C(5X)   | 120.66(19) | H(21A)-C(21)-H(21B)  | 107.3      |
| C(4AX)-C(4X)-H(4X)   | 119.7      | Si(1)-C(22A)-H(22A)  | 109.5      |
| C(5X)-C(4X)-H(4X)    | 119.7      | Si(1)-C(22A)-H(22B)  | 109.5      |
| C(6X)-C(5X)-C(4X)    | 120.3(2)   | H(22A)-C(22A)-H(22B) | 109.5      |
| C(6X)-C(5X)-H(5X)    | 119.9      | Si(1)-C(22A)-H(22C)  | 109.5      |
| C(4X)-C(5X)-H(5X)    | 119.9      | H(22A)-C(22A)-H(22C) | 109.5      |
| C(5X)-C(6X)-C(7X)    | 119.79(19) | H(22B)-C(22A)-H(22C) | 109.5      |
| C(5X)-C(6X)-H(6X)    | 120.1      | Si(1)-C(23A)-H(23A)  | 109.5      |
| C(7X)-C(6X)-H(6X)    | 120.1      | Si(1)-C(23A)-H(23B)  | 109.5      |
| C(7AX)-C(7X)-C(6X)   | 119.4(2)   | H(23A)-C(23A)-H(23B) | 109.5      |
| C(7AX)-C(7X)-H(7X)   | 120.3      | Si(1)-C(23A)-H(23C)  | 109.5      |
| C(6X)-C(7X)-H(7X)    | 120.3      | H(23A)-C(23A)-H(23C) | 109.5      |
| C(7X)-C(7AX)-C(4AX)  | 121.59(19) | H(23B)-C(23A)-H(23C) | 109.5      |
| C(7X)-C(7AX)-N(8X)   | 121.03(19) | Si(1)-C(24A)-H(24A)  | 109.5      |
| C(4AX)-C(7AX)-N(8X)  | 117.35(17) | Si(1)-C(24A)-H(24B)  | 109.5      |
| N(1)-C(8AX)-N(1X)    | 111.88(16) | H(24A)-C(24A)-H(24B) | 109.5      |
| N(1)-C(8AX)-C(3AX)   | 113.68(16) | Si(1)-C(24A)-H(24C)  | 109.5      |
| N(1X)-C(8AX)-C(3AX)  | 103.40(15) | H(24A)-C(24A)-H(24C) | 109.5      |
| N(1)-C(8AX)-H(8AX)   | 109.2      | H(24B)-C(24A)-H(24C) | 109.5      |
| N(1X)-C(8AX)-H(8AX)  | 109.2      | Si(1)-C(22B)-H(22D)  | 109.5      |
| C(3AX)-C(8AX)-H(8AX) | 109.2      | Si(1)-C(22B)-H(22E)  | 109.5      |
| C(7AX)-N(8X)-C(8A)   | 114.49(17) | H(22D)-C(22B)-H(22E) | 109.5      |
| C(7AX)-N(8X)-S(1)    | 121.83(14) | Si(1)-C(22B)-H(22F)  | 109.5      |
| C(8A)-N(8X)-S(1)     | 118.24(14) | H(22D)-C(22B)-H(22F) | 109.5      |
| O(2)-C(1XX)-N(1X)    | 121.1(2)   | H(22E)-C(22B)-H(22F) | 109.5      |
| O(2)-C(1XX)-C(2XX)   | 122.0(2)   | Si(1)-C(23B)-H(23D)  | 109.5      |
| N(1X)-C(1XX)-C(2XX)  | 116.83(19) | Si(1)-C(23B)-H(23E)  | 109.5      |
| C(3XX)-C(2XX)-C(1XX) | 122.1(2)   | H(23D)-C(23B)-H(23E) | 109.5      |
| C(3XX)-C(2XX)-H(2XX) | 119.0      | Si(1)-C(23B)-H(23F)  | 109.5      |
| C(1XX)-C(2XX)-H(2XX) | 119.0      | H(23D)-C(23B)-H(23F) | 109.5      |
| C(2XX)-C(3XX)-C(4XX) | 124.9(2)   | H(23E)-C(23B)-H(23F) | 109.5      |
| C(2XX)-C(3XX)-H(3XX) | 117.5      | Si(1)-C(24B)-H(24D)  | 109.5      |
| C(4XX)-C(3XX)-H(3XX) | 117.5      | Si(1)-C(24B)-H(24E)  | 109.5      |
| C(5XX)-C(4XX)-C(3XX) | 123.7(3)   | H(24D)-C(24B)-H(24E) | 109.5      |

|                      |       |
|----------------------|-------|
| Si(1)-C(24B)-H(24F)  | 109.5 |
| H(24D)-C(24B)-H(24F) | 109.5 |
| H(24E)-C(24B)-H(24F) | 109.5 |

Symmetry transformations used to generate equivalent atoms:

**Table S29.** Anisotropic displacement parameters ( $\text{\AA}^2 \times 10^3$ ) for (-)-N8'-(trimethylsilyl)ethanesulfonyl communesin B (**45**). The anisotropic displacement factor exponent takes the form:  $-2\pi^2 [h^2 a^{*2} U^{11} + \dots + 2 h k a^* b^* U^{12}]$

|        | U <sup>11</sup> | U <sup>22</sup> | U <sup>33</sup> | U <sup>23</sup> | U <sup>13</sup> | U <sup>12</sup> |
|--------|-----------------|-----------------|-----------------|-----------------|-----------------|-----------------|
| S(1)   | 18(1)           | 27(1)           | 21(1)           | -1(1)           | 0(1)            | -2(1)           |
| Si(1)  | 34(1)           | 75(1)           | 38(1)           | 28(1)           | 4(1)            | -6(1)           |
| O(1)   | 31(1)           | 31(1)           | 24(1)           | -6(1)           | -3(1)           | 6(1)            |
| O(2)   | 44(1)           | 26(1)           | 46(1)           | 10(1)           | 14(1)           | 6(1)            |
| O(3)   | 23(1)           | 38(1)           | 25(1)           | -4(1)           | -2(1)           | -2(1)           |
| O(4)   | 21(1)           | 28(1)           | 26(1)           | -1(1)           | 1(1)            | 1(1)            |
| N(1)   | 22(1)           | 21(1)           | 21(1)           | -5(1)           | -2(1)           | 2(1)            |
| C(2)   | 25(1)           | 26(1)           | 21(1)           | -5(1)           | -5(1)           | 1(1)            |
| C(3)   | 23(1)           | 24(1)           | 25(1)           | -5(1)           | -4(1)           | -2(1)           |
| C(3A)  | 22(1)           | 20(1)           | 22(1)           | -2(1)           | -1(1)           | -1(1)           |
| C(4)   | 25(1)           | 18(1)           | 24(1)           | -5(1)           | -3(1)           | 0(1)            |
| C(4A)  | 24(1)           | 19(1)           | 24(1)           | -3(1)           | -4(1)           | -1(1)           |
| C(5)   | 28(1)           | 24(1)           | 35(1)           | -3(1)           | -4(1)           | 3(1)            |
| C(6)   | 34(1)           | 24(1)           | 40(1)           | 0(1)            | -8(1)           | 6(1)            |
| C(7)   | 38(1)           | 27(1)           | 31(1)           | 5(1)            | -6(1)           | 1(1)            |
| C(7A)  | 30(1)           | 22(1)           | 28(1)           | -2(1)           | -3(1)           | -1(1)           |
| N(8)   | 39(1)           | 32(1)           | 32(1)           | 11(1)           | 8(1)            | 10(1)           |
| C(8)   | 45(2)           | 74(2)           | 64(2)           | 40(2)           | 9(2)            | 3(2)            |
| C(8A)  | 28(1)           | 22(1)           | 25(1)           | -2(1)           | 0(1)            | -1(1)           |
| C(9)   | 21(1)           | 21(1)           | 24(1)           | -5(1)           | -1(1)           | 1(1)            |
| C(10)  | 25(1)           | 24(1)           | 26(1)           | -4(1)           | -1(1)           | 0(1)            |
| C(11)  | 26(1)           | 28(1)           | 26(1)           | -8(1)           | -2(1)           | 3(1)            |
| C(12)  | 38(1)           | 31(1)           | 34(1)           | -13(1)          | -2(1)           | 5(1)            |
| C(13)  | 26(1)           | 40(1)           | 39(1)           | -16(1)          | 0(1)            | 1(1)            |
| N(1X)  | 25(1)           | 20(1)           | 24(1)           | 0(1)            | 2(1)            | 4(1)            |
| C(1X)  | 27(1)           | 23(1)           | 25(1)           | 0(1)            | 2(1)            | 6(1)            |
| C(2X)  | 21(1)           | 23(1)           | 22(1)           | -2(1)           | -2(1)           | 4(1)            |
| C(3AX) | 20(1)           | 20(1)           | 19(1)           | -2(1)           | -2(1)           | 1(1)            |
| C(4AX) | 20(1)           | 20(1)           | 21(1)           | -2(1)           | -2(1)           | 2(1)            |
| C(4X)  | 22(1)           | 25(1)           | 23(1)           | -4(1)           | 1(1)            | 0(1)            |
| C(5X)  | 22(1)           | 31(1)           | 28(1)           | -8(1)           | -1(1)           | 0(1)            |
| C(6X)  | 24(1)           | 37(1)           | 23(1)           | -9(1)           | -3(1)           | 1(1)            |
| C(7X)  | 22(1)           | 32(1)           | 21(1)           | -3(1)           | 1(1)            | 2(1)            |
| C(7AX) | 18(1)           | 24(1)           | 23(1)           | -2(1)           | -2(1)           | 1(1)            |
| C(8AX) | 21(1)           | 19(1)           | 21(1)           | -2(1)           | 0(1)            | 1(1)            |
| N(8X)  | 20(1)           | 26(1)           | 23(1)           | -1(1)           | 0(1)            | -1(1)           |
| C(1XX) | 31(1)           | 26(1)           | 26(1)           | 2(1)            | 2(1)            | 1(1)            |
| C(2XX) | 34(1)           | 26(1)           | 28(1)           | 2(1)            | 6(1)            | 3(1)            |
| C(3XX) | 37(1)           | 30(1)           | 28(1)           | 4(1)            | 4(1)            | 4(1)            |
| C(4XX) | 38(1)           | 44(1)           | 28(1)           | 6(1)            | 3(1)            | 9(1)            |
| C(5XX) | 37(1)           | 69(2)           | 30(1)           | 10(1)           | 2(1)            | 4(1)            |

|        |         |         |         |        |        |        |
|--------|---------|---------|---------|--------|--------|--------|
| C(6XX) | 42(2)   | 138(4)  | 36(2)   | 10(2)  | 8(1)   | 22(2)  |
| C(20)  | 24(1)   | 32(1)   | 29(1)   | 4(1)   | 3(1)   | -5(1)  |
| C(21)  | 37(1)   | 50(2)   | 28(1)   | 6(1)   | 2(1)   | -11(1) |
| C(22A) | 60(4)   | 54(4)   | 45(4)   | 22(3)  | -10(3) | -6(3)  |
| C(23A) | 56(7)   | 62(5)   | 57(6)   | 15(4)  | 14(5)  | -11(5) |
| C(24A) | 70(5)   | 92(8)   | 23(2)   | 4(4)   | -1(3)  | -24(5) |
| C(22B) | 117(16) | 61(8)   | 130(19) | 43(9)  | 57(14) | 15(10) |
| C(23B) | 22(5)   | 111(18) | 53(10)  | 39(11) | 4(5)   | 3(7)   |
| C(24B) | 51(7)   | 110(13) | 40(5)   | 31(7)  | -3(5)  | -32(8) |

**Table S30.** Hydrogen coordinates ( $\times 10^4$ ) and isotropic displacement parameters ( $\text{\AA}^2 \times 10^3$ ) for (-)-N8'-(trimethylsilyl)ethanesulfonyl communesin B (**45**).

|        | x     | y    | z    | U(eq) |
|--------|-------|------|------|-------|
| H(2A)  | 5090  | 5180 | 2129 | 29    |
| H(2B)  | 4398  | 6004 | 2259 | 29    |
| H(3A)  | 2821  | 5415 | 2807 | 29    |
| H(3B)  | 3990  | 4673 | 2794 | 29    |
| H(5)   | 10109 | 4281 | 3103 | 34    |
| H(6)   | 9789  | 3695 | 3848 | 39    |
| H(7)   | 7302  | 3861 | 4309 | 38    |
| H(8A)  | 3124  | 4009 | 4312 | 91    |
| H(8B)  | 3278  | 4751 | 4639 | 91    |
| H(8C)  | 4794  | 4149 | 4631 | 91    |
| H(8A1) | 2636  | 5040 | 3627 | 30    |
| H(9)   | 9163  | 5439 | 2594 | 27    |
| H(10)  | 6971  | 4224 | 2277 | 30    |
| H(12A) | 7981  | 3413 | 1673 | 52    |
| H(12B) | 9754  | 3191 | 1919 | 52    |
| H(12C) | 9725  | 3548 | 1387 | 52    |
| H(13A) | 11604 | 4650 | 1637 | 53    |
| H(13B) | 11755 | 4318 | 2173 | 53    |
| H(13C) | 11041 | 5153 | 2090 | 53    |
| H(1X1) | 4391  | 7800 | 2608 | 30    |
| H(1X2) | 5338  | 7893 | 3121 | 30    |
| H(2X1) | 3256  | 6646 | 2817 | 26    |
| H(2X2) | 3212  | 7062 | 3335 | 26    |
| H(4X)  | 7974  | 7202 | 3616 | 28    |
| H(5X)  | 8378  | 7685 | 4395 | 32    |
| H(6X)  | 6505  | 7364 | 5018 | 34    |
| H(7X)  | 4146  | 6589 | 4853 | 30    |
| H(8AX) | 7920  | 6383 | 3049 | 24    |
| H(2XX) | 8991  | 6561 | 2165 | 35    |
| H(3XX) | 10657 | 7948 | 2110 | 38    |
| H(4XX) | 11841 | 6510 | 1764 | 44    |
| H(5XX) | 13456 | 7907 | 1735 | 54    |
| H(6X1) | 14508 | 6465 | 1365 | 108   |
| H(6X2) | 15825 | 7074 | 1571 | 108   |
| H(6X3) | 14855 | 7229 | 1072 | 108   |
| H(20A) | -1127 | 5846 | 4361 | 34    |
| H(20B) | 287   | 5200 | 4331 | 34    |
| H(21A) | 339   | 6422 | 5002 | 46    |

|        |       |      |      |     |
|--------|-------|------|------|-----|
| H(21B) | 1814  | 5807 | 4964 | 46  |
| H(22A) | 1097  | 4108 | 5296 | 79  |
| H(22B) | -375  | 4139 | 4897 | 79  |
| H(22C) | -818  | 3903 | 5441 | 79  |
| H(23A) | -3331 | 5108 | 5631 | 87  |
| H(23B) | -3201 | 5176 | 5055 | 87  |
| H(23C) | -3116 | 5918 | 5384 | 87  |
| H(24A) | 489   | 6036 | 6019 | 93  |
| H(24B) | 1547  | 5266 | 5988 | 93  |
| H(24C) | -300  | 5272 | 6231 | 93  |
| H(22D) | -184  | 4169 | 5075 | 154 |
| H(22E) | -334  | 4117 | 5651 | 154 |
| H(22F) | 1403  | 4394 | 5407 | 154 |
| H(23D) | -3403 | 5413 | 5079 | 93  |
| H(23E) | -3166 | 5992 | 5518 | 93  |
| H(23F) | -3499 | 5117 | 5625 | 93  |
| H(24D) | -417  | 5635 | 6294 | 101 |
| H(24E) | -273  | 6397 | 5986 | 101 |
| H(24F) | 1358  | 5866 | 6052 | 101 |

---

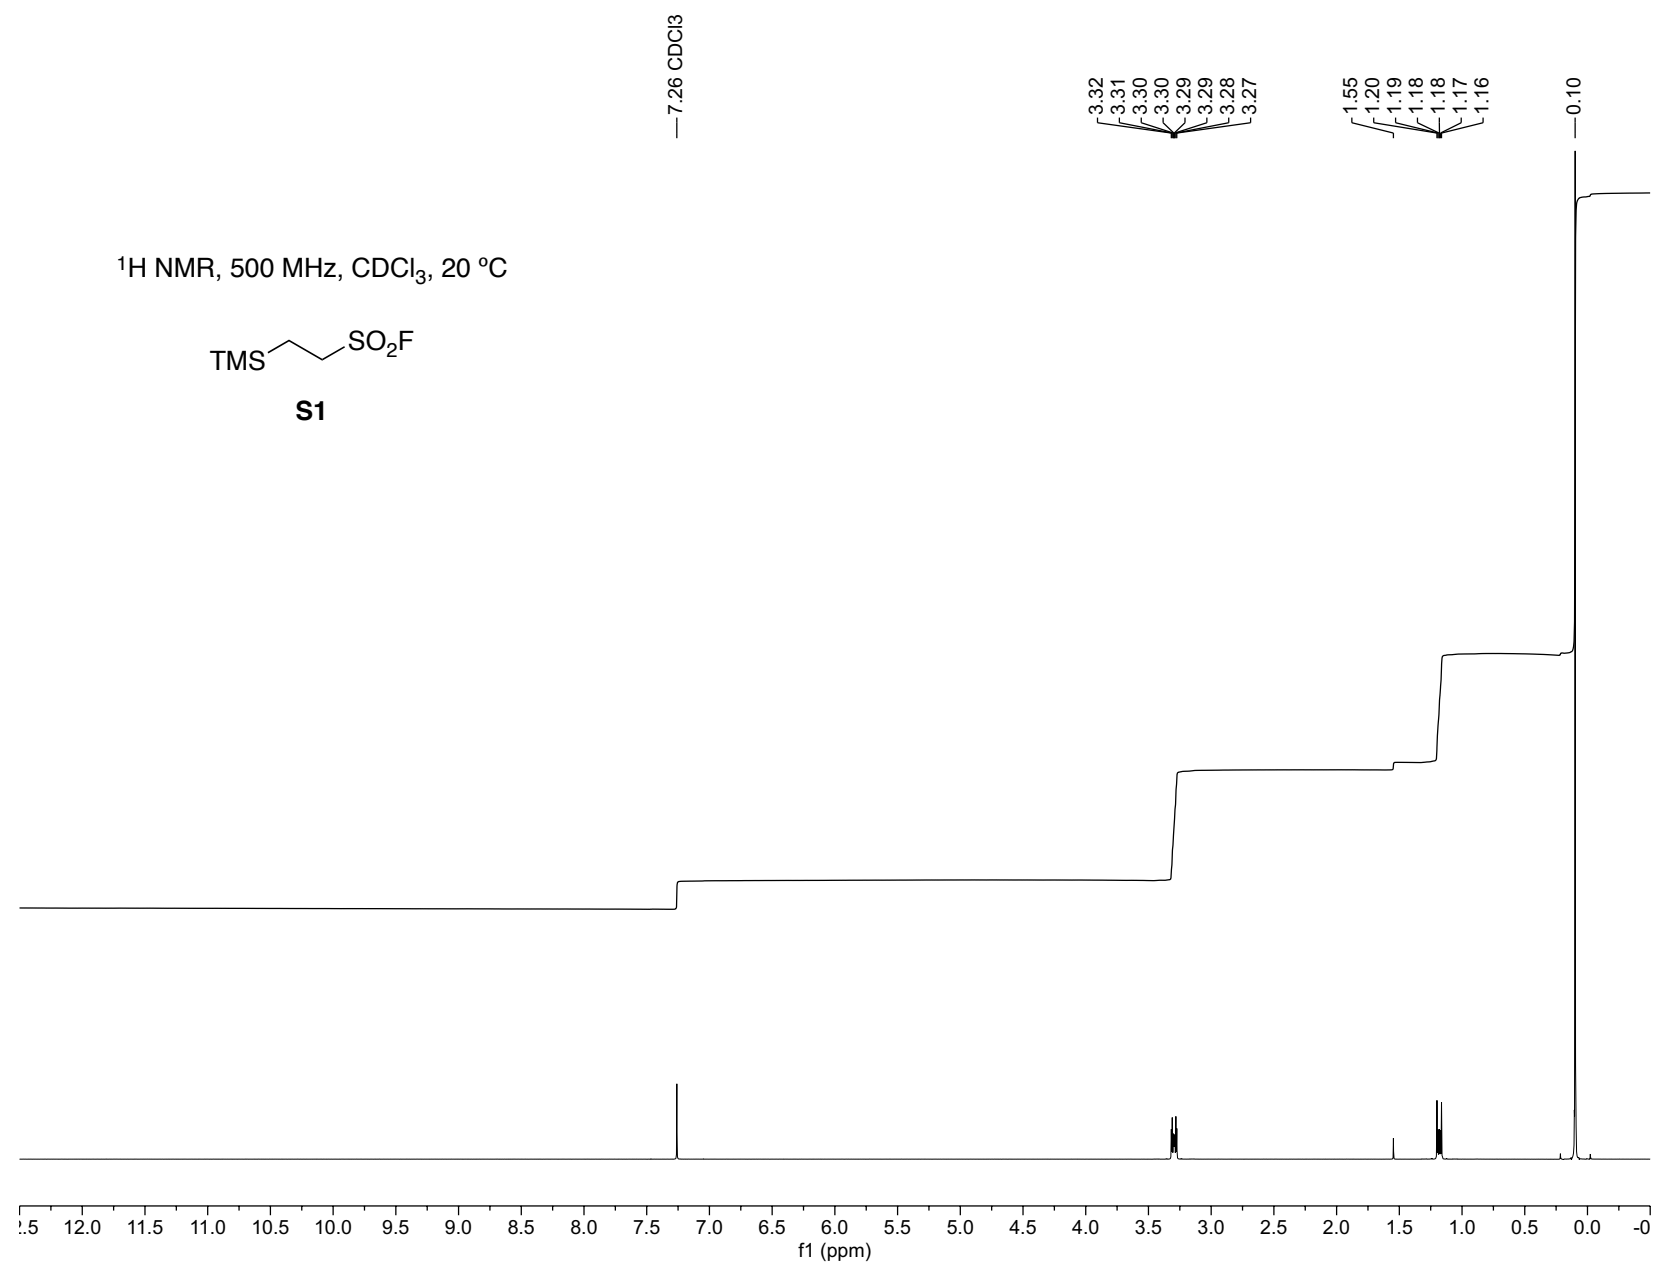

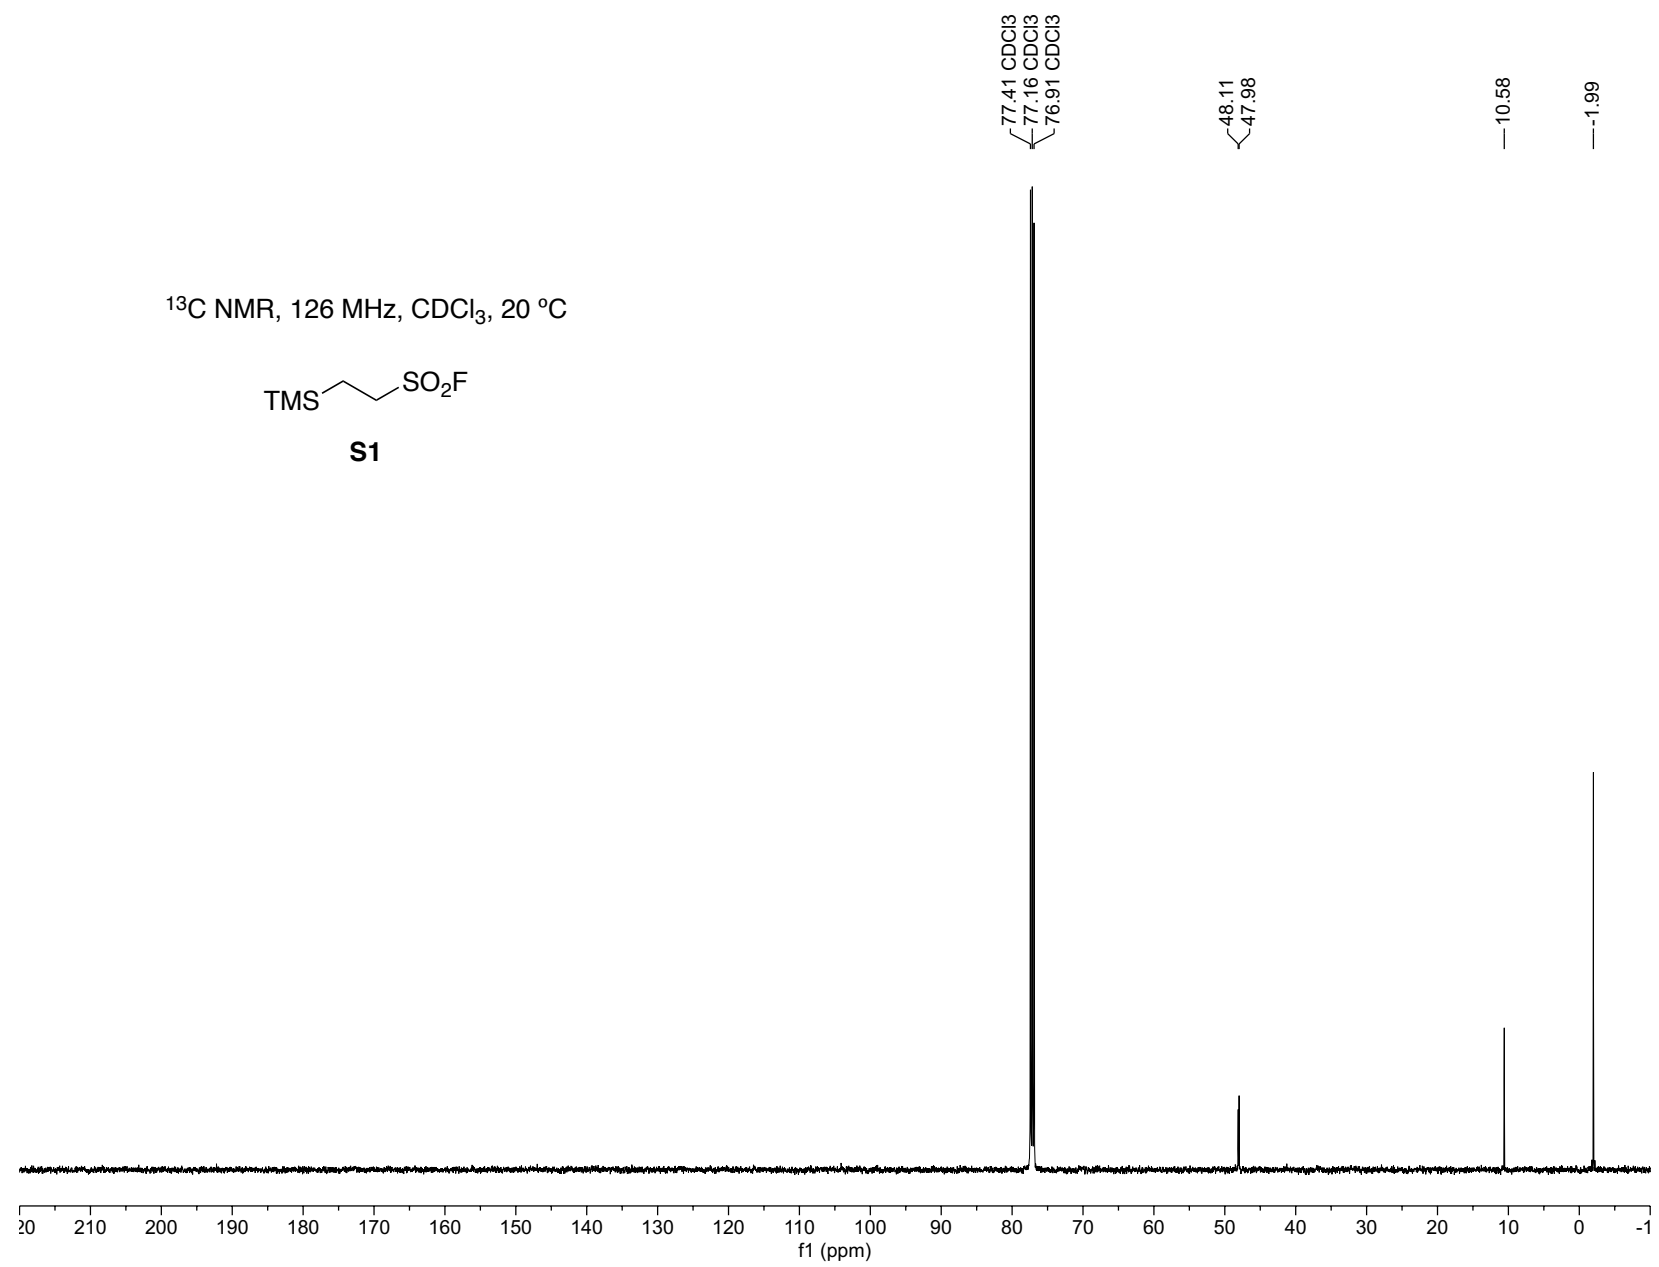

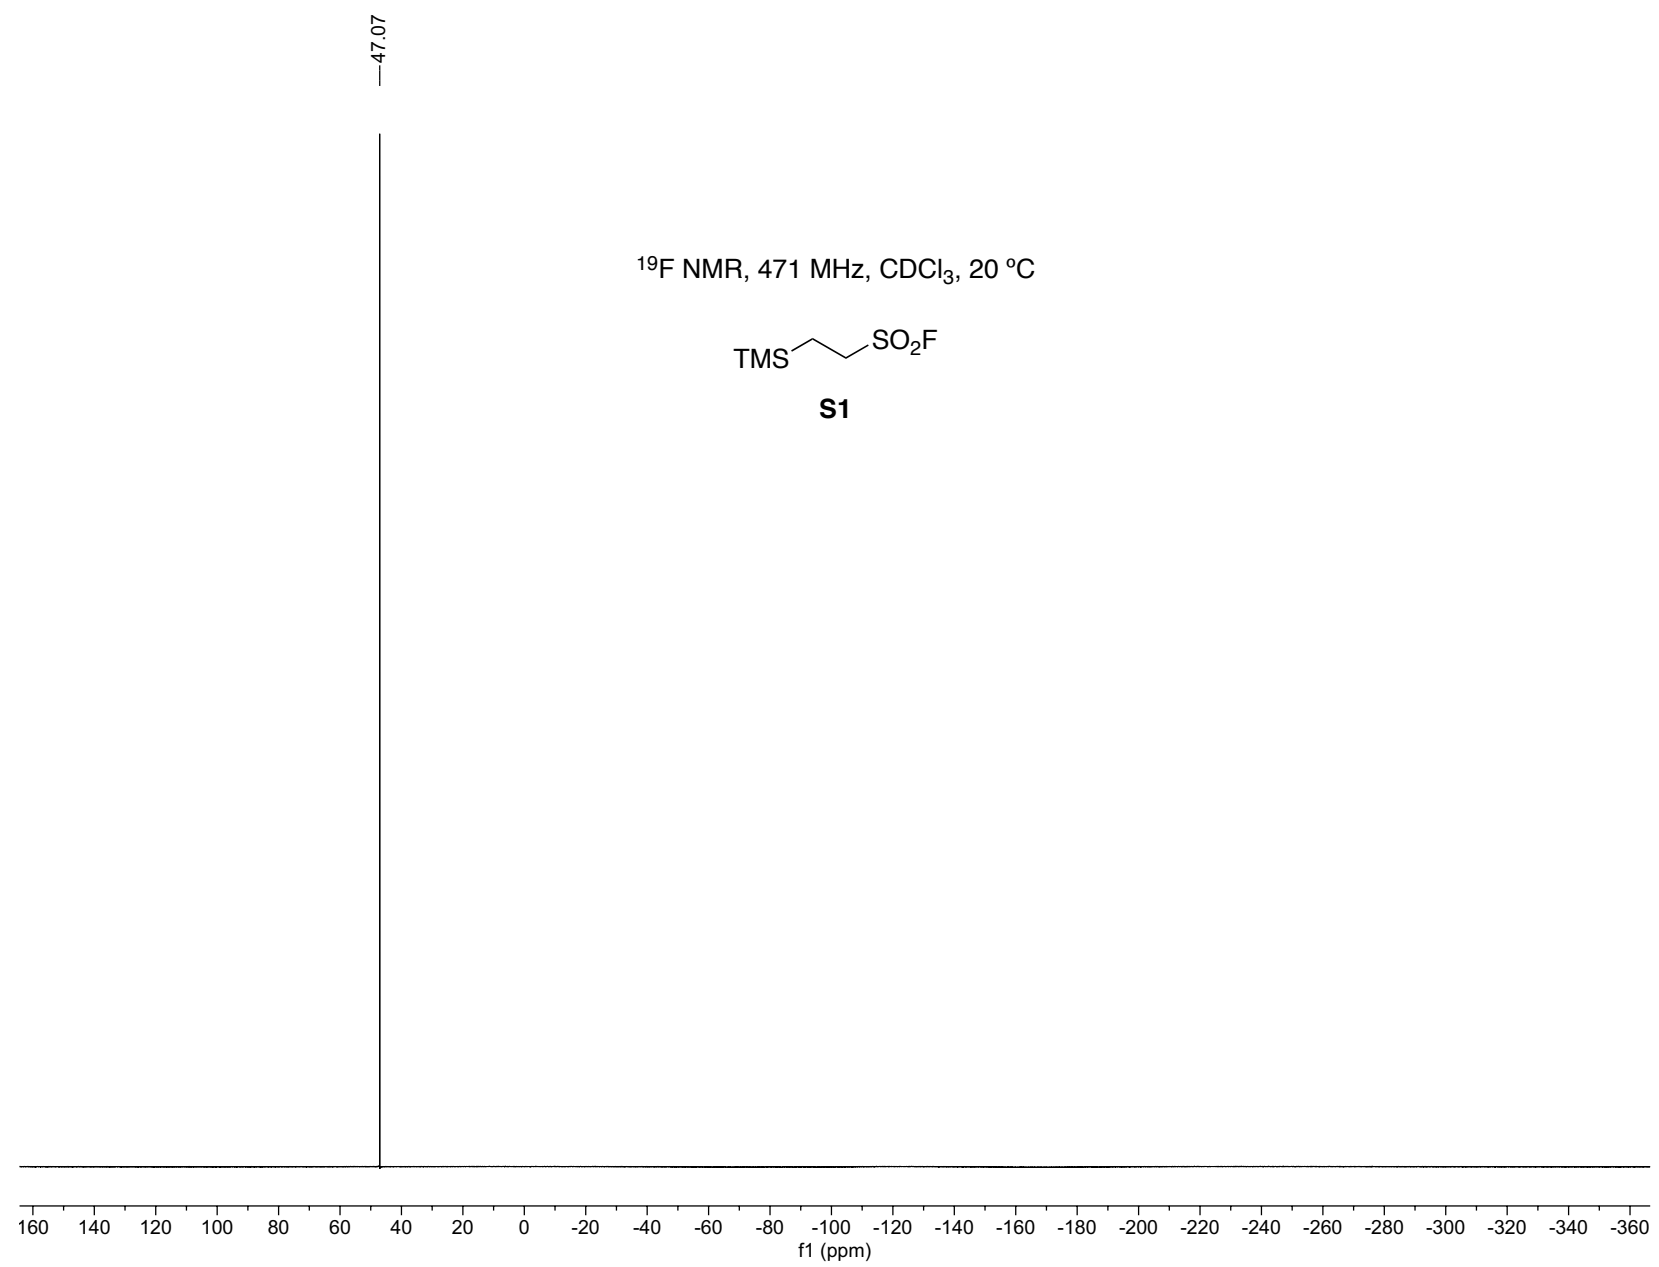



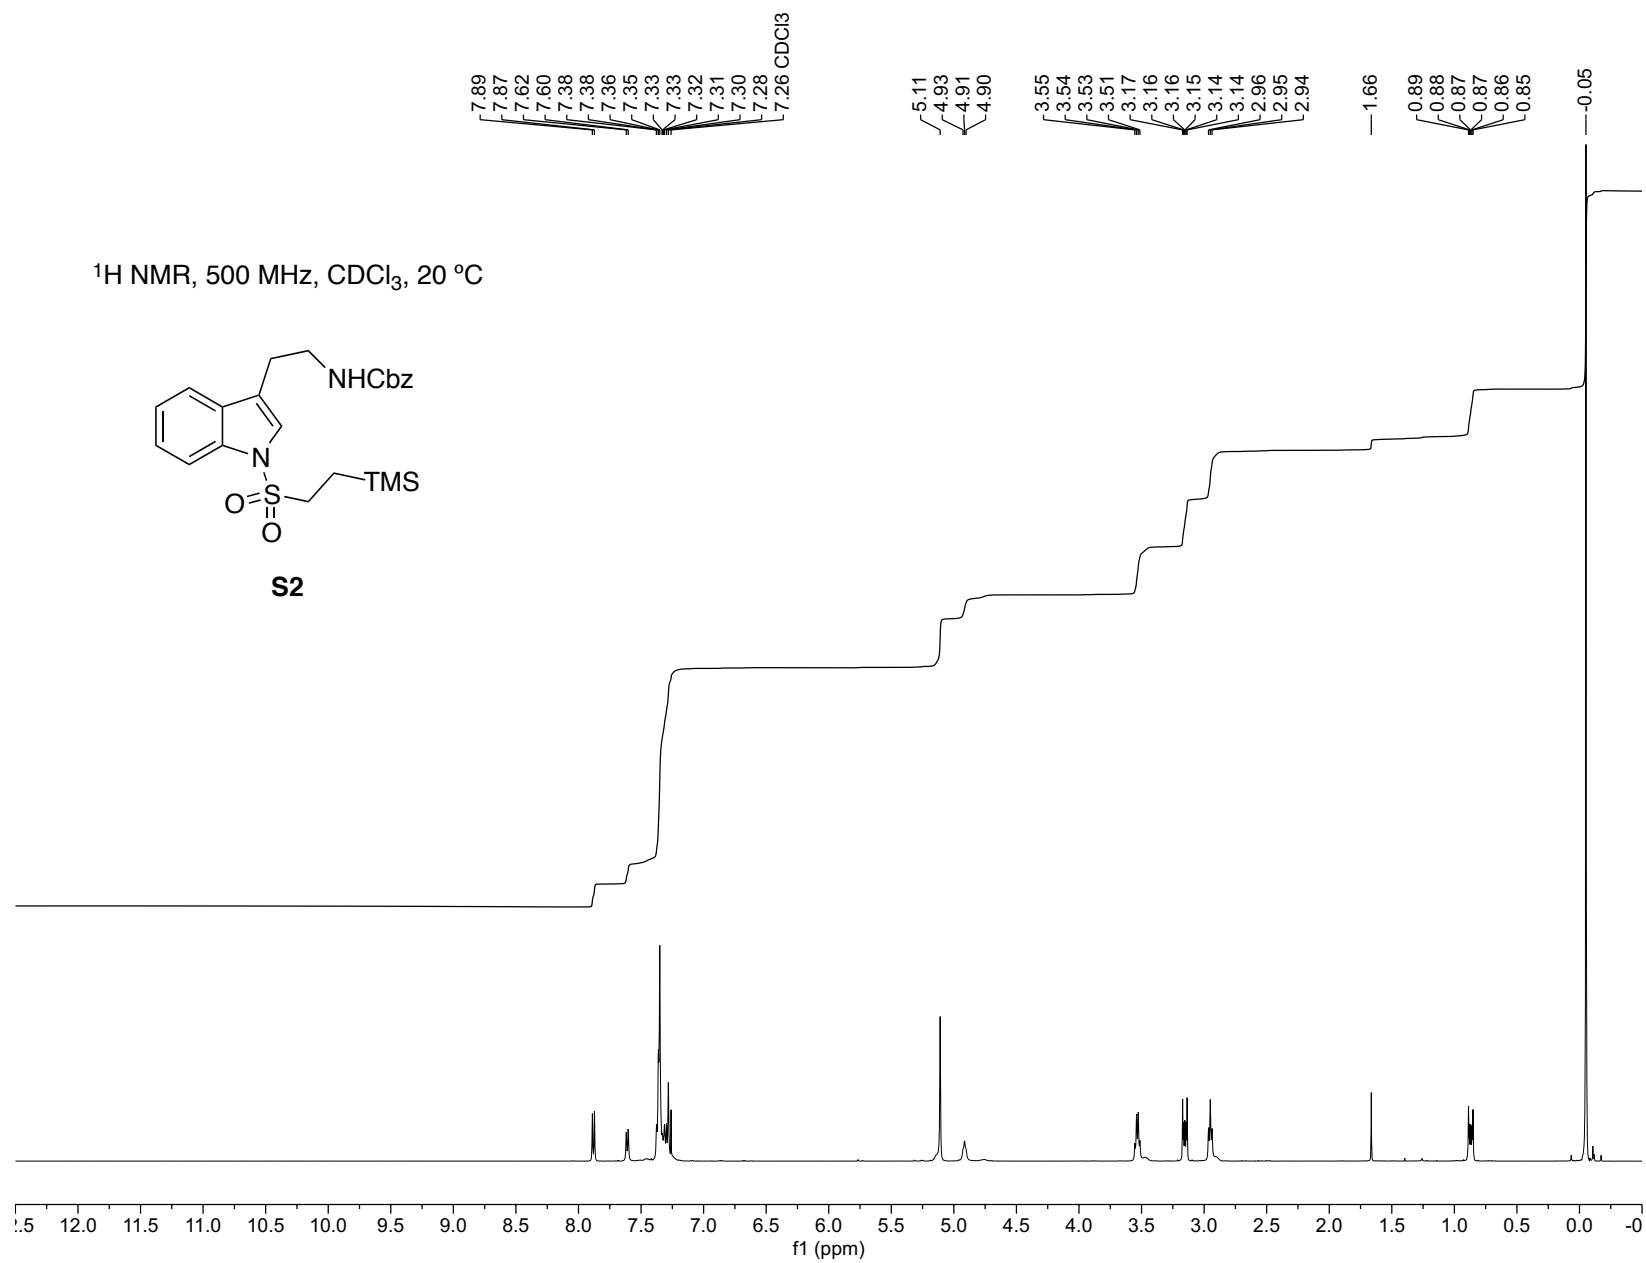

$^{13}\text{C}$  NMR, 126 MHz,  $\text{CDCl}_3$ , 20 °C

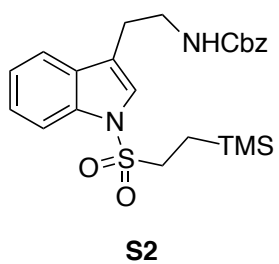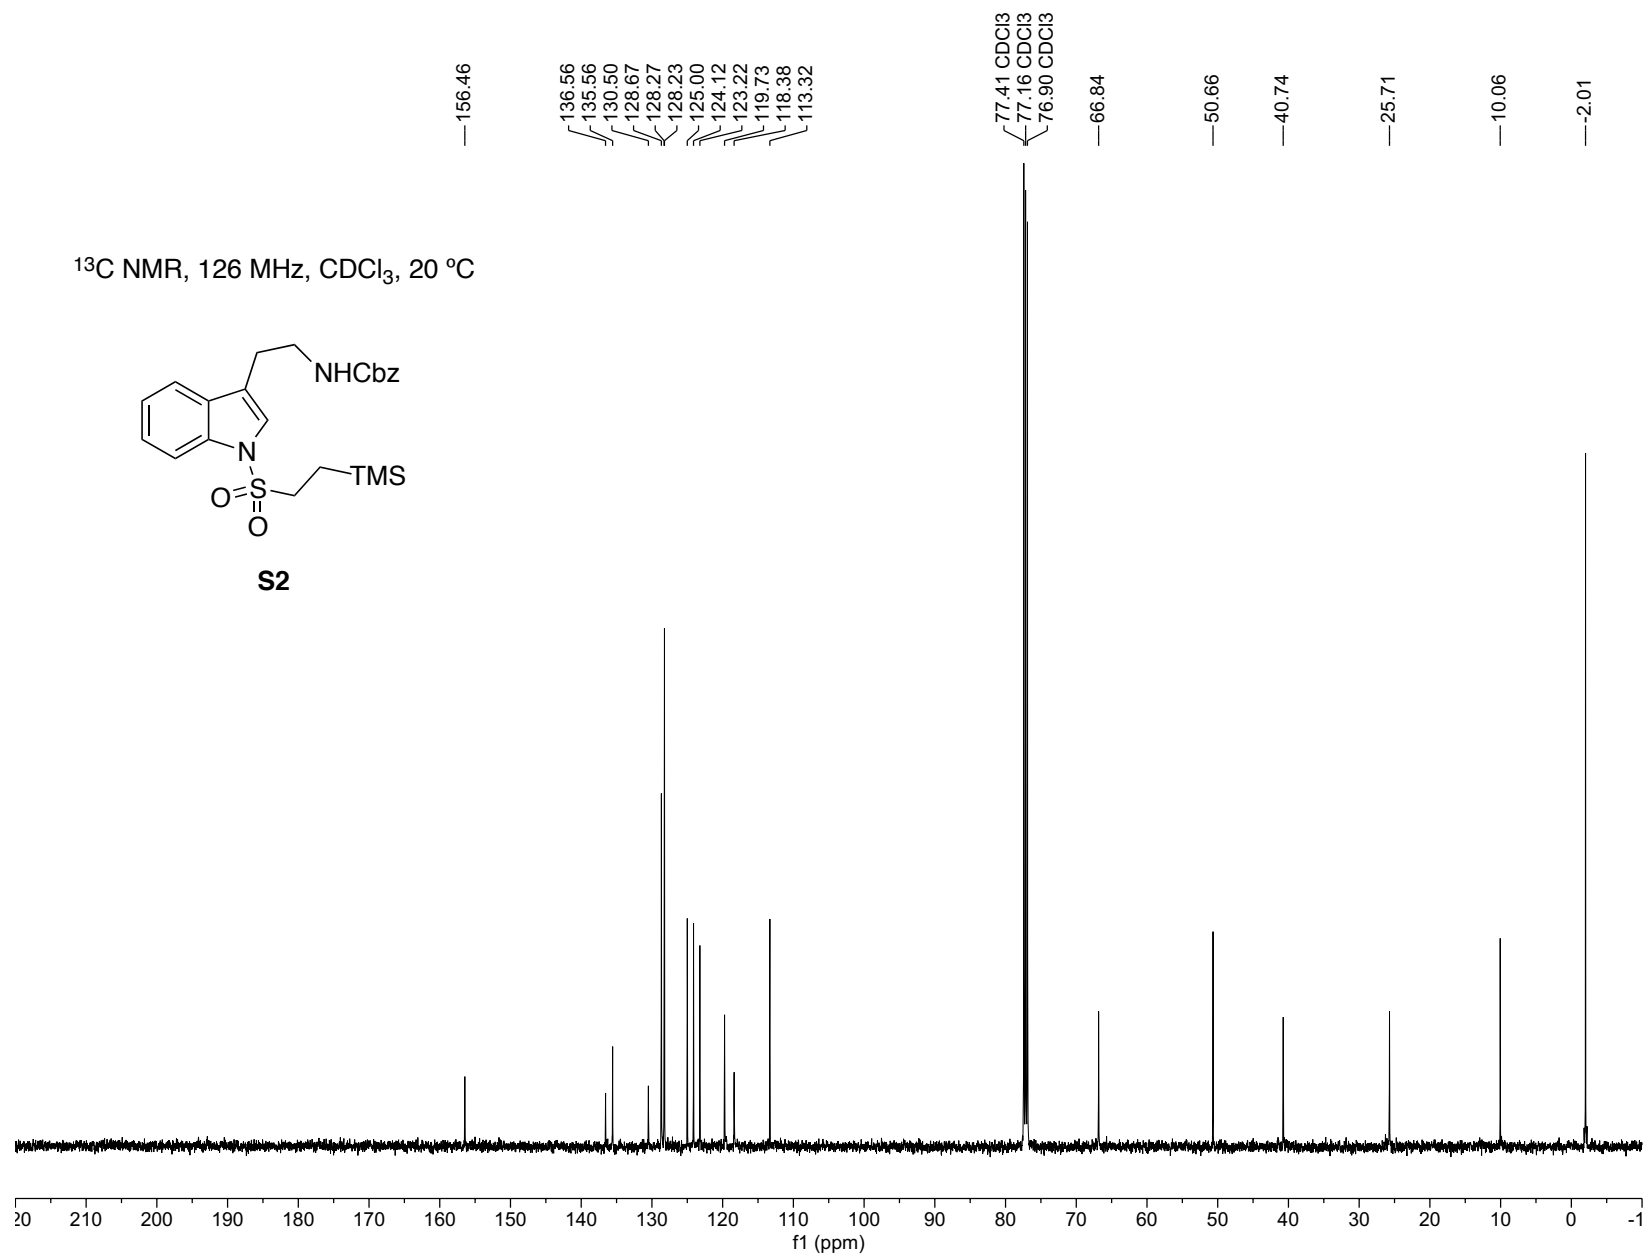



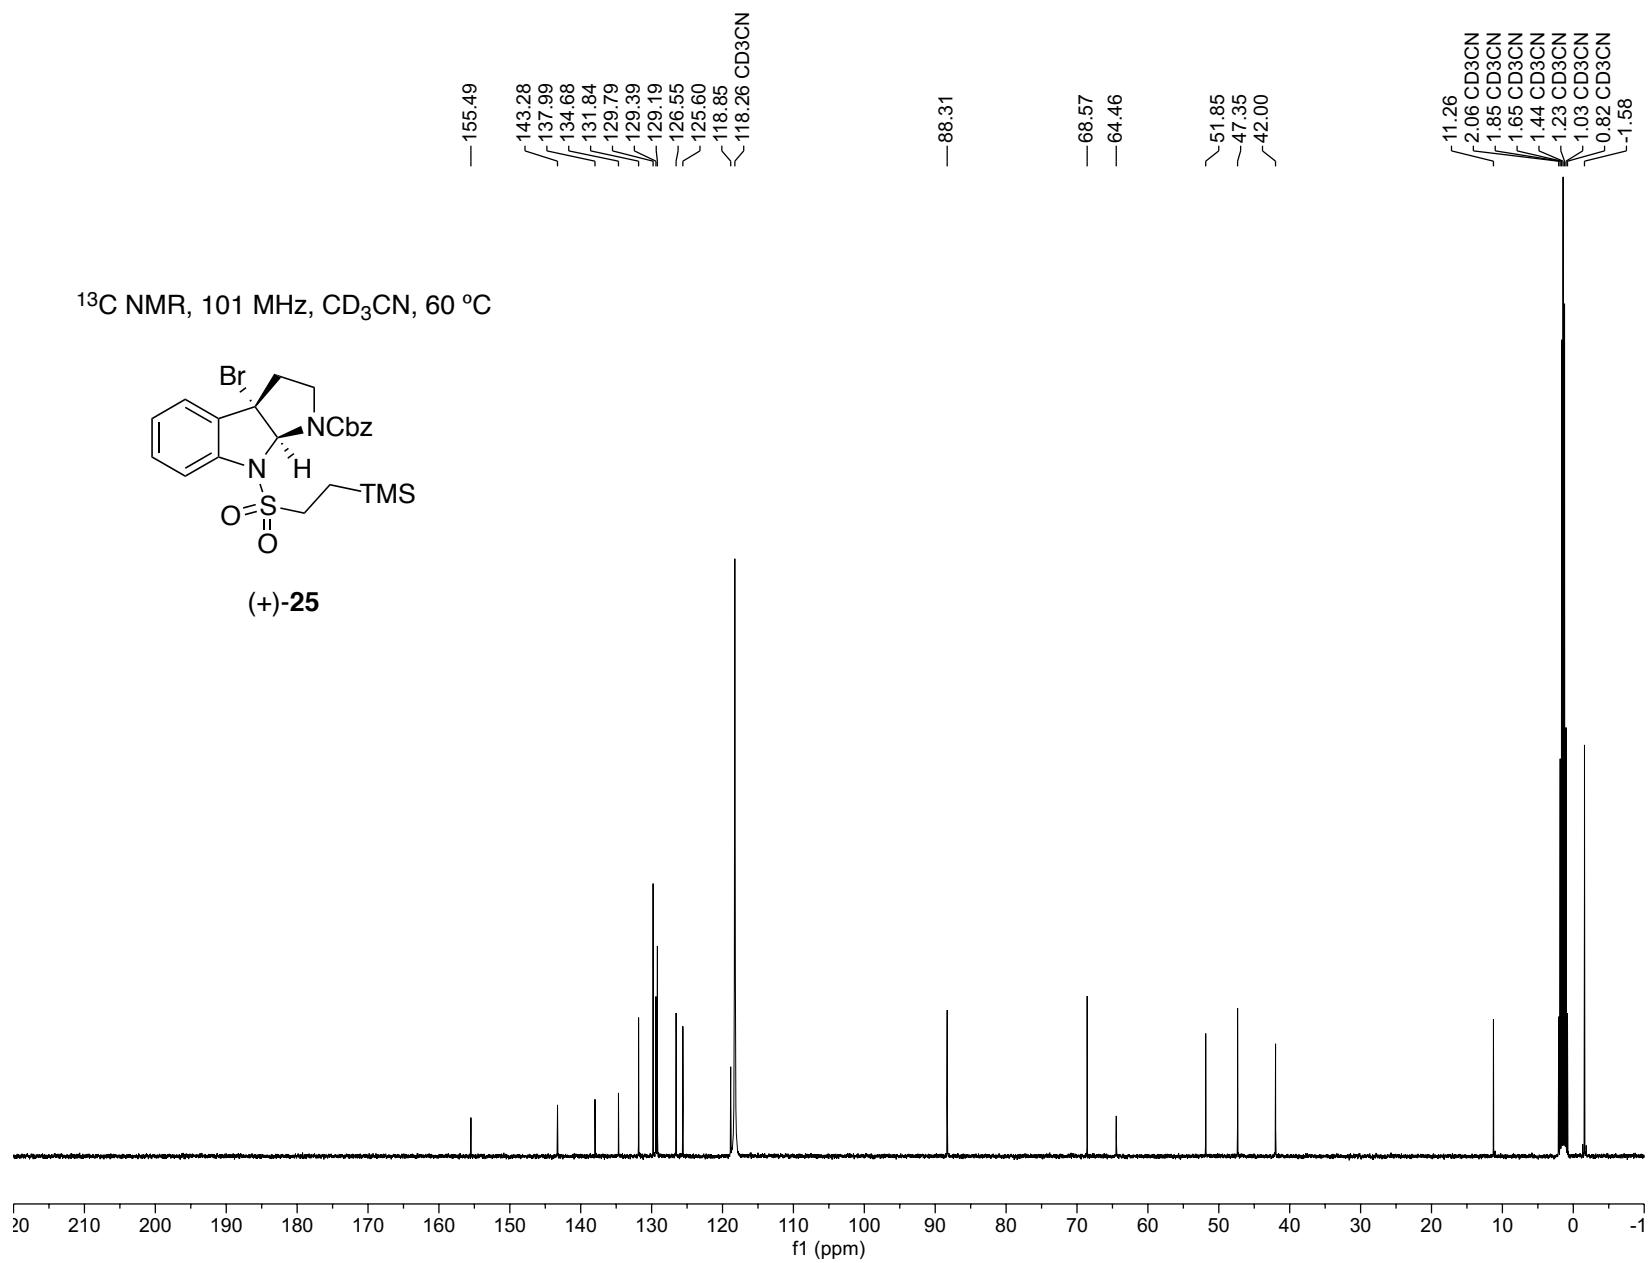

racemate

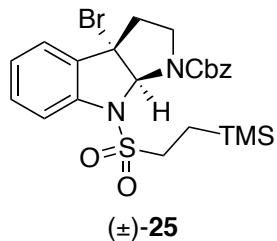

**HPLC conditions:**

CHIRALPAK® IA, Lot# IA00CE-PD046

10% *i*-PrOH in hexanes

1.0 mL/min

$\lambda = 210 \text{ nm}$

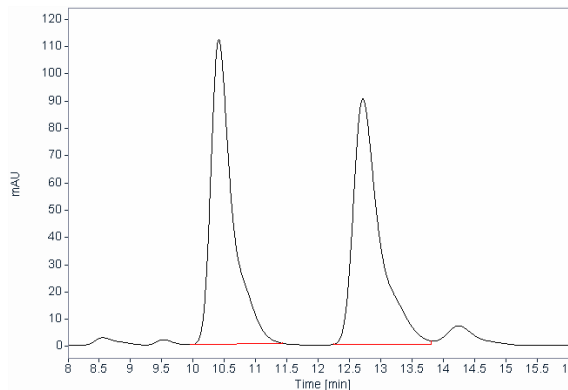

**Signal:** DAD1 C, Sig=210,8 Ref=360,100

| Ret. Time (min) | Area%   |
|-----------------|---------|
| 10.403          | 50.3953 |
| 12.705          | 49.6047 |

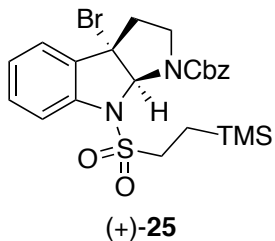

**HPLC conditions:**

CHIRALPAK® IA, Lot# IA00CE-PD046

10% *i*-PrOH in hexanes

1.0 mL/min

$\lambda = 210 \text{ nm}$

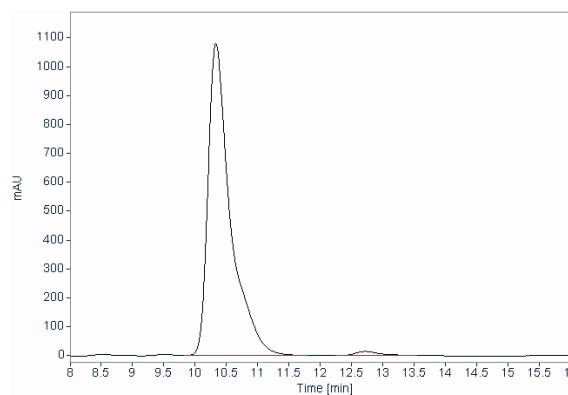

**Signal:** DAD1 C, Sig=210,8 Ref=360,100

| Ret. Time (min) | Area%   |
|-----------------|---------|
| 10.324          | 98.4645 |
| 12.711          | 1.5355  |

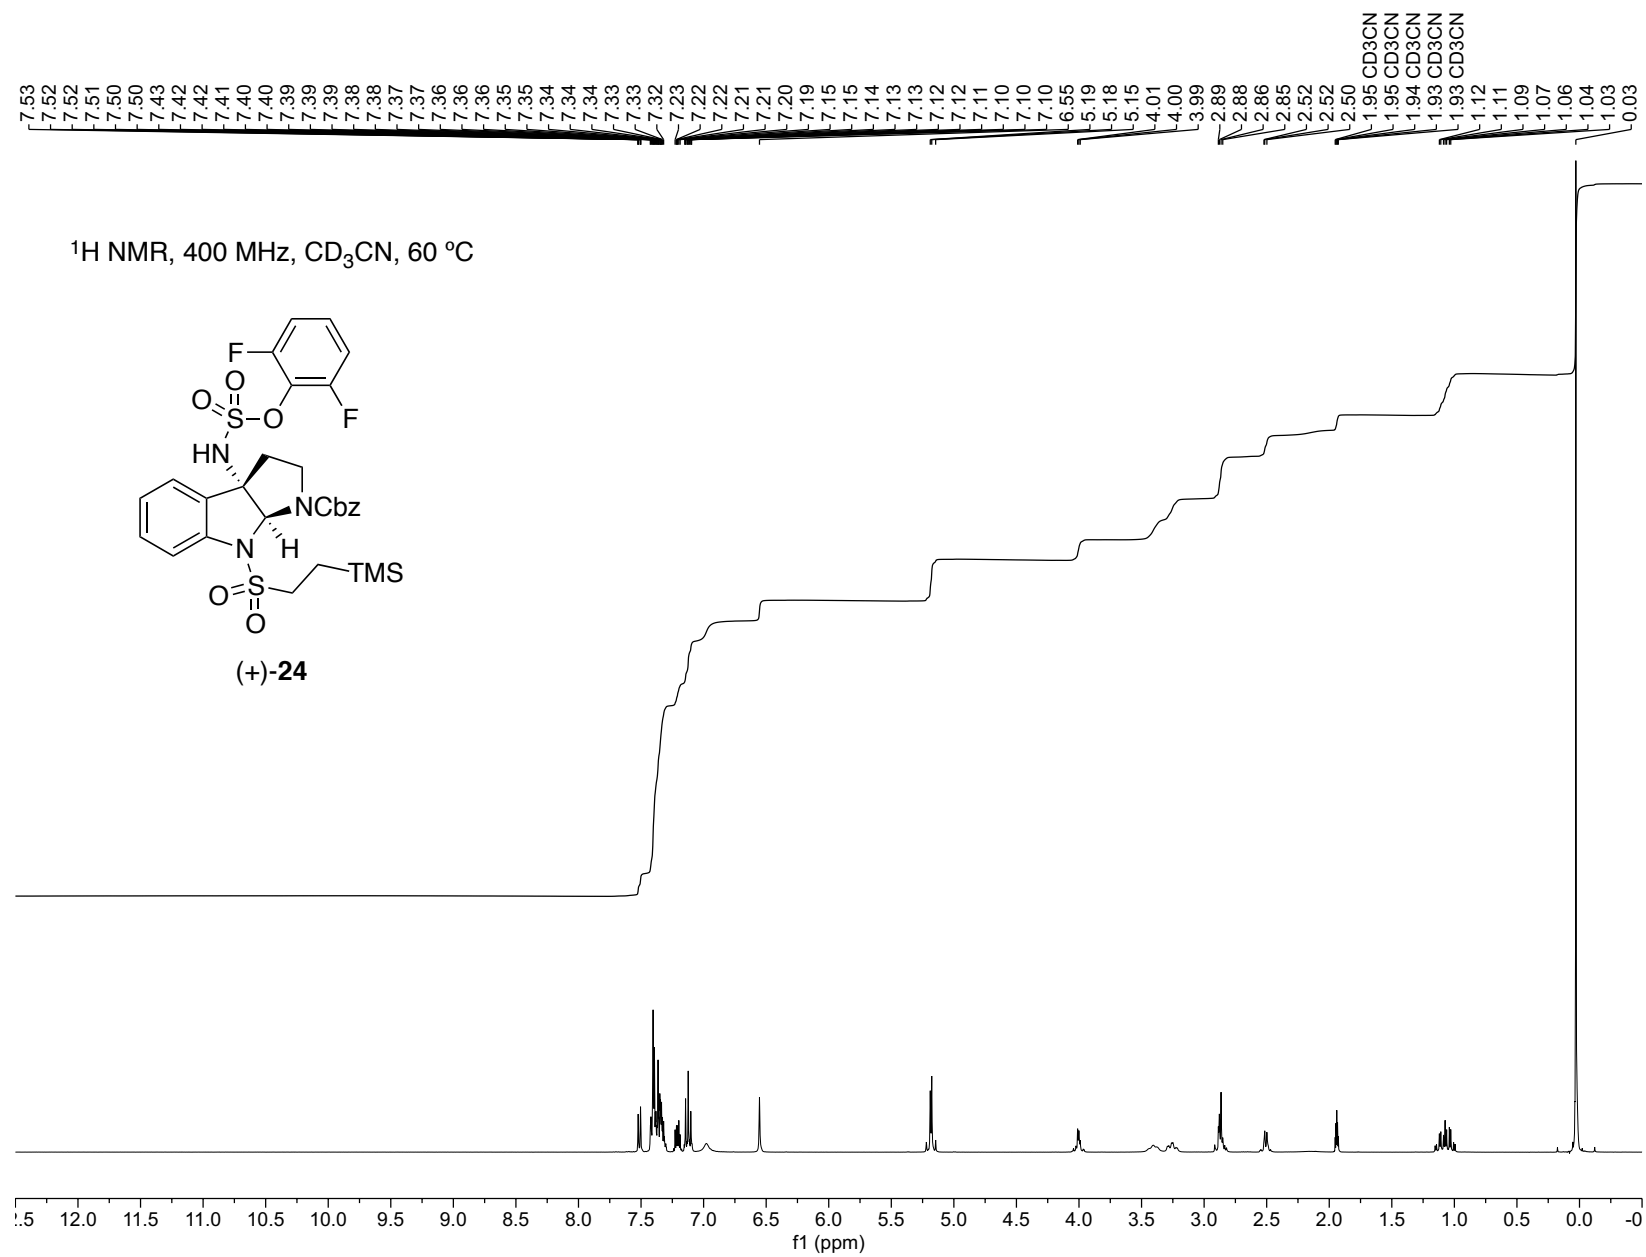

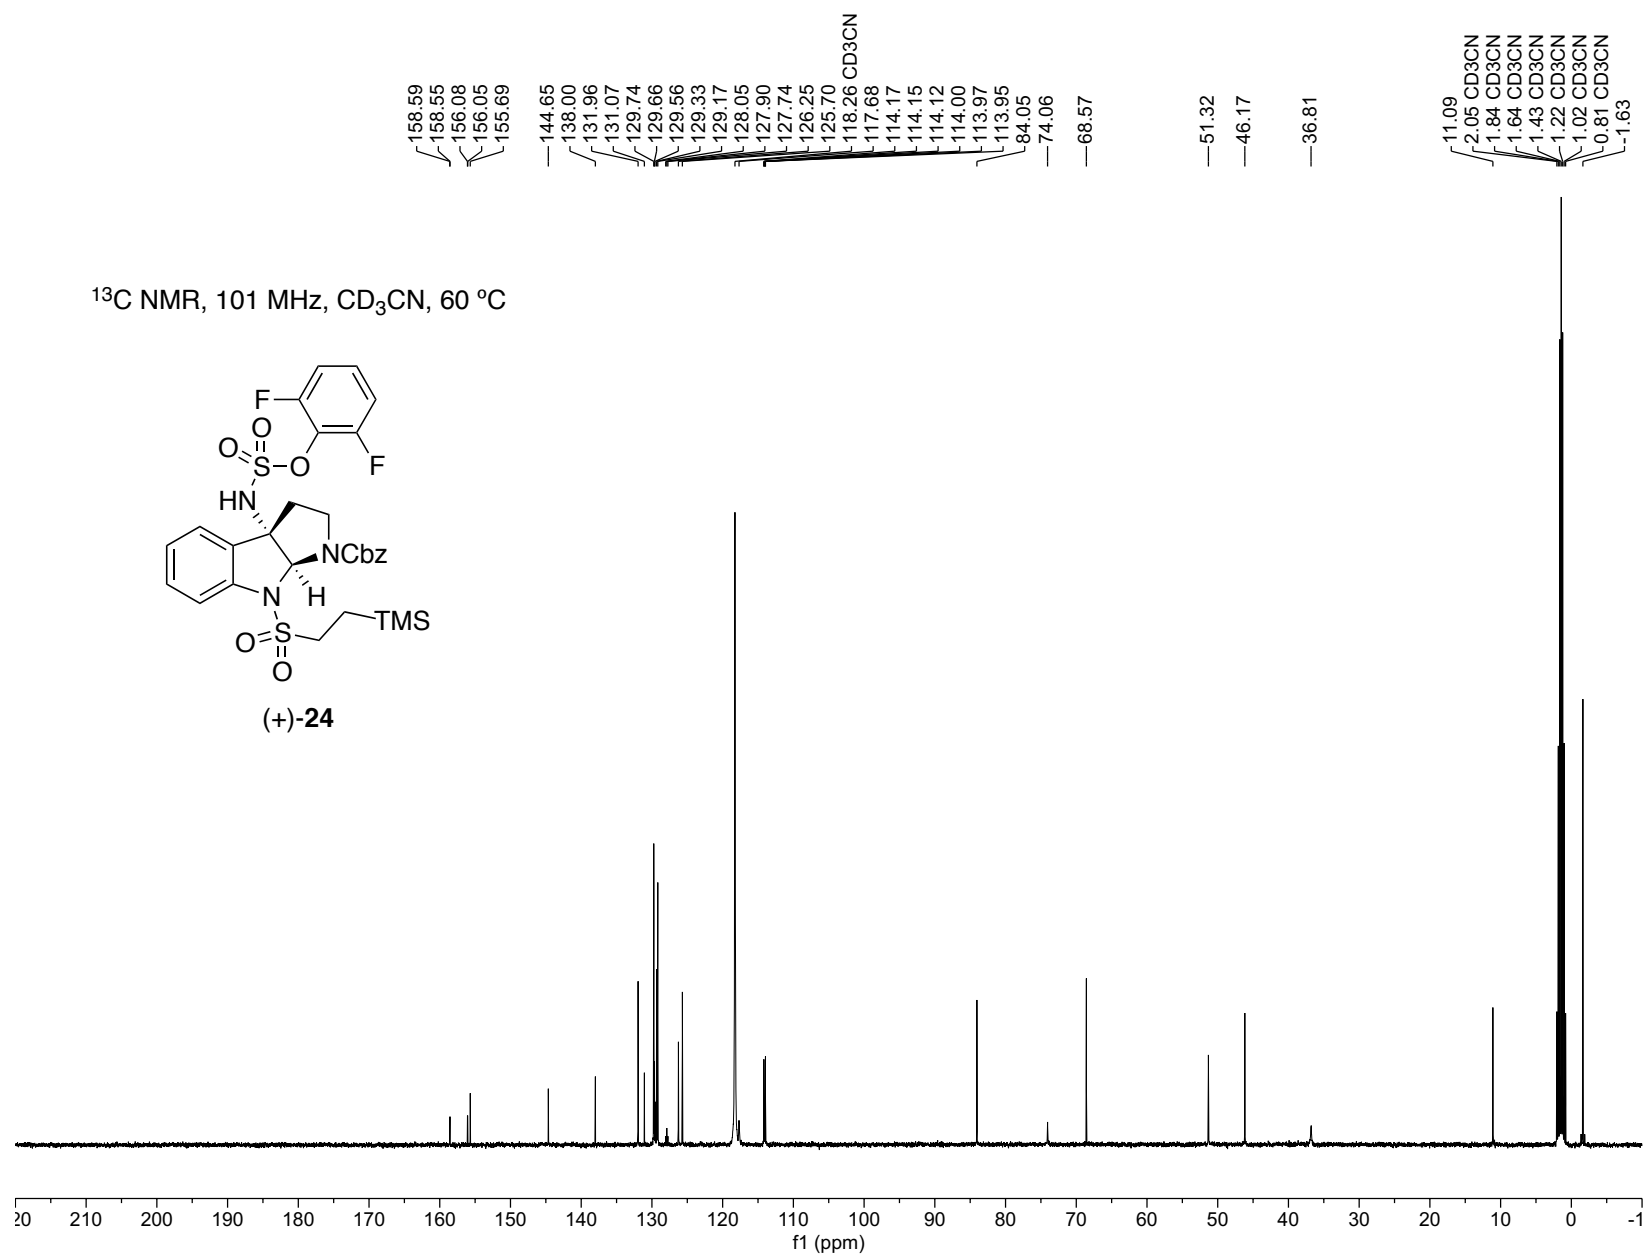

$^{19}\text{F}$  NMR, 376 MHz,  $\text{CD}_3\text{CN}$ , 25°C

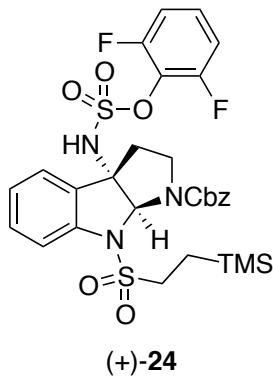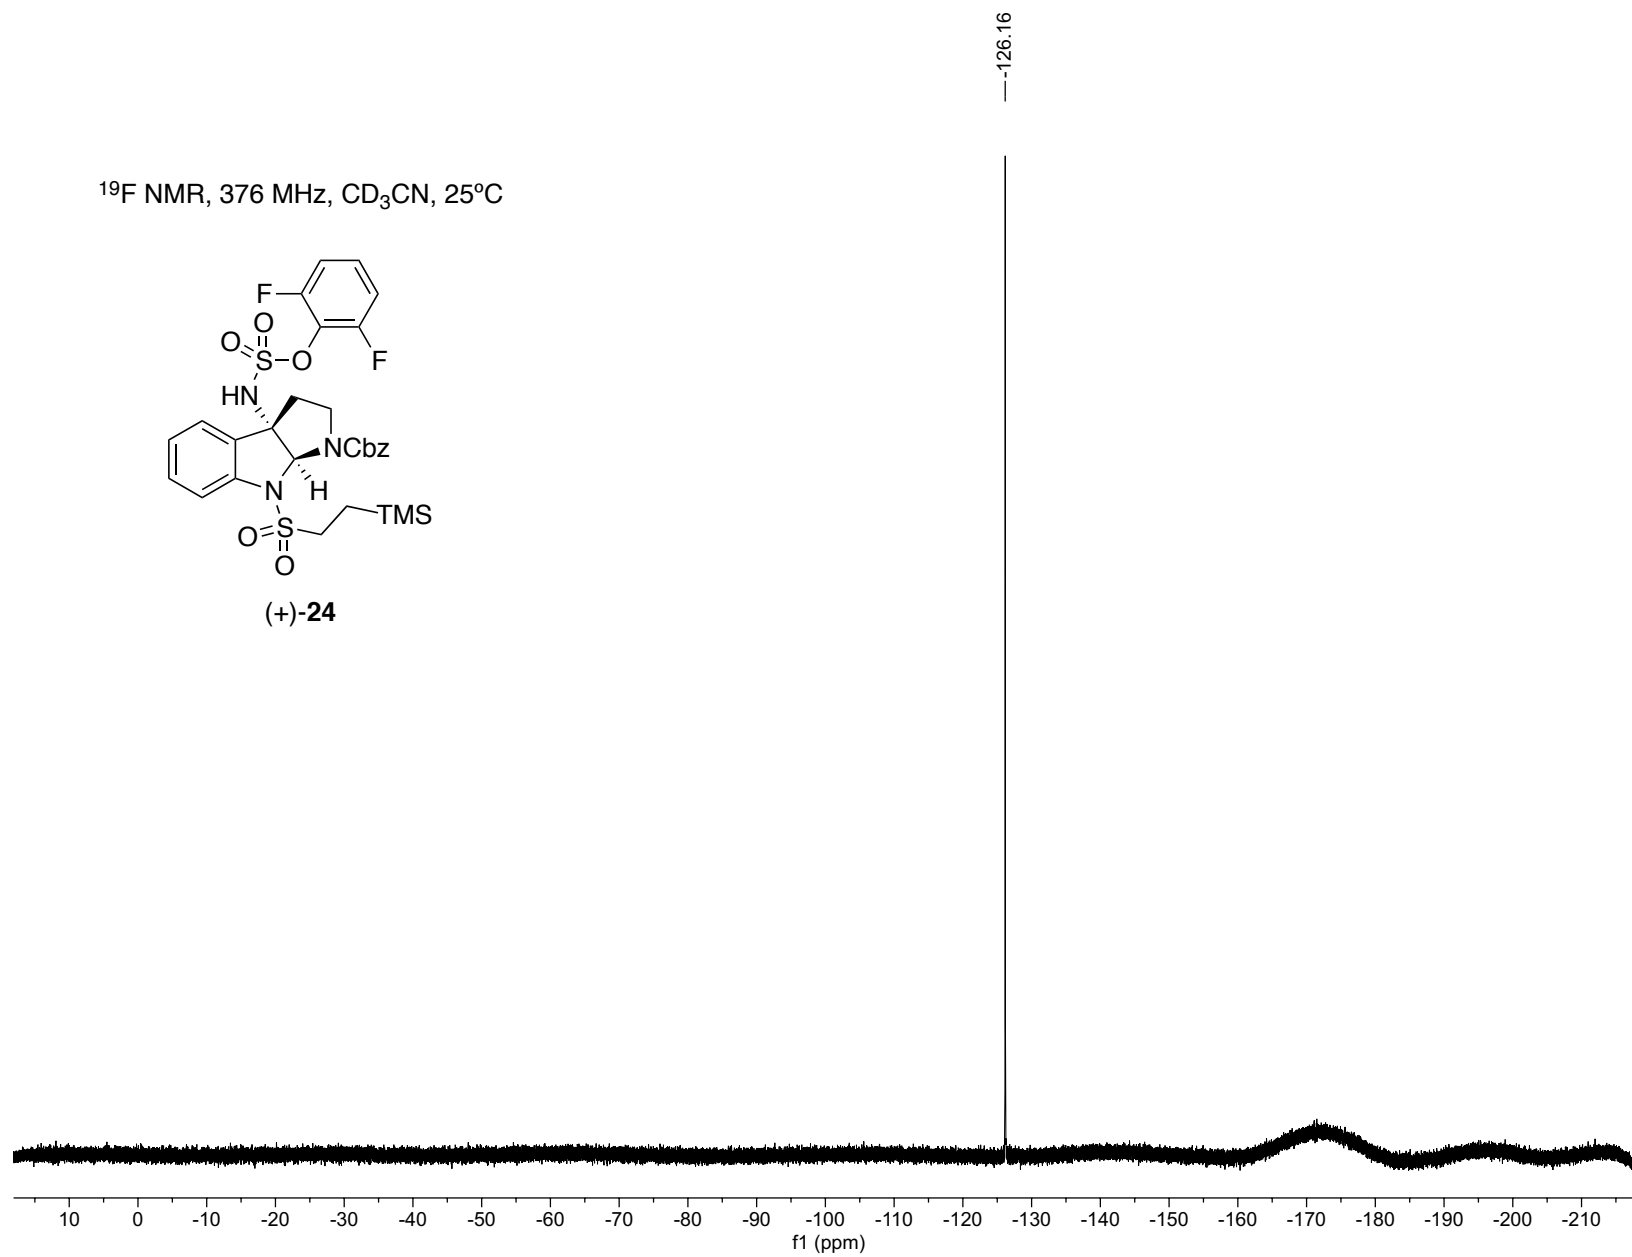



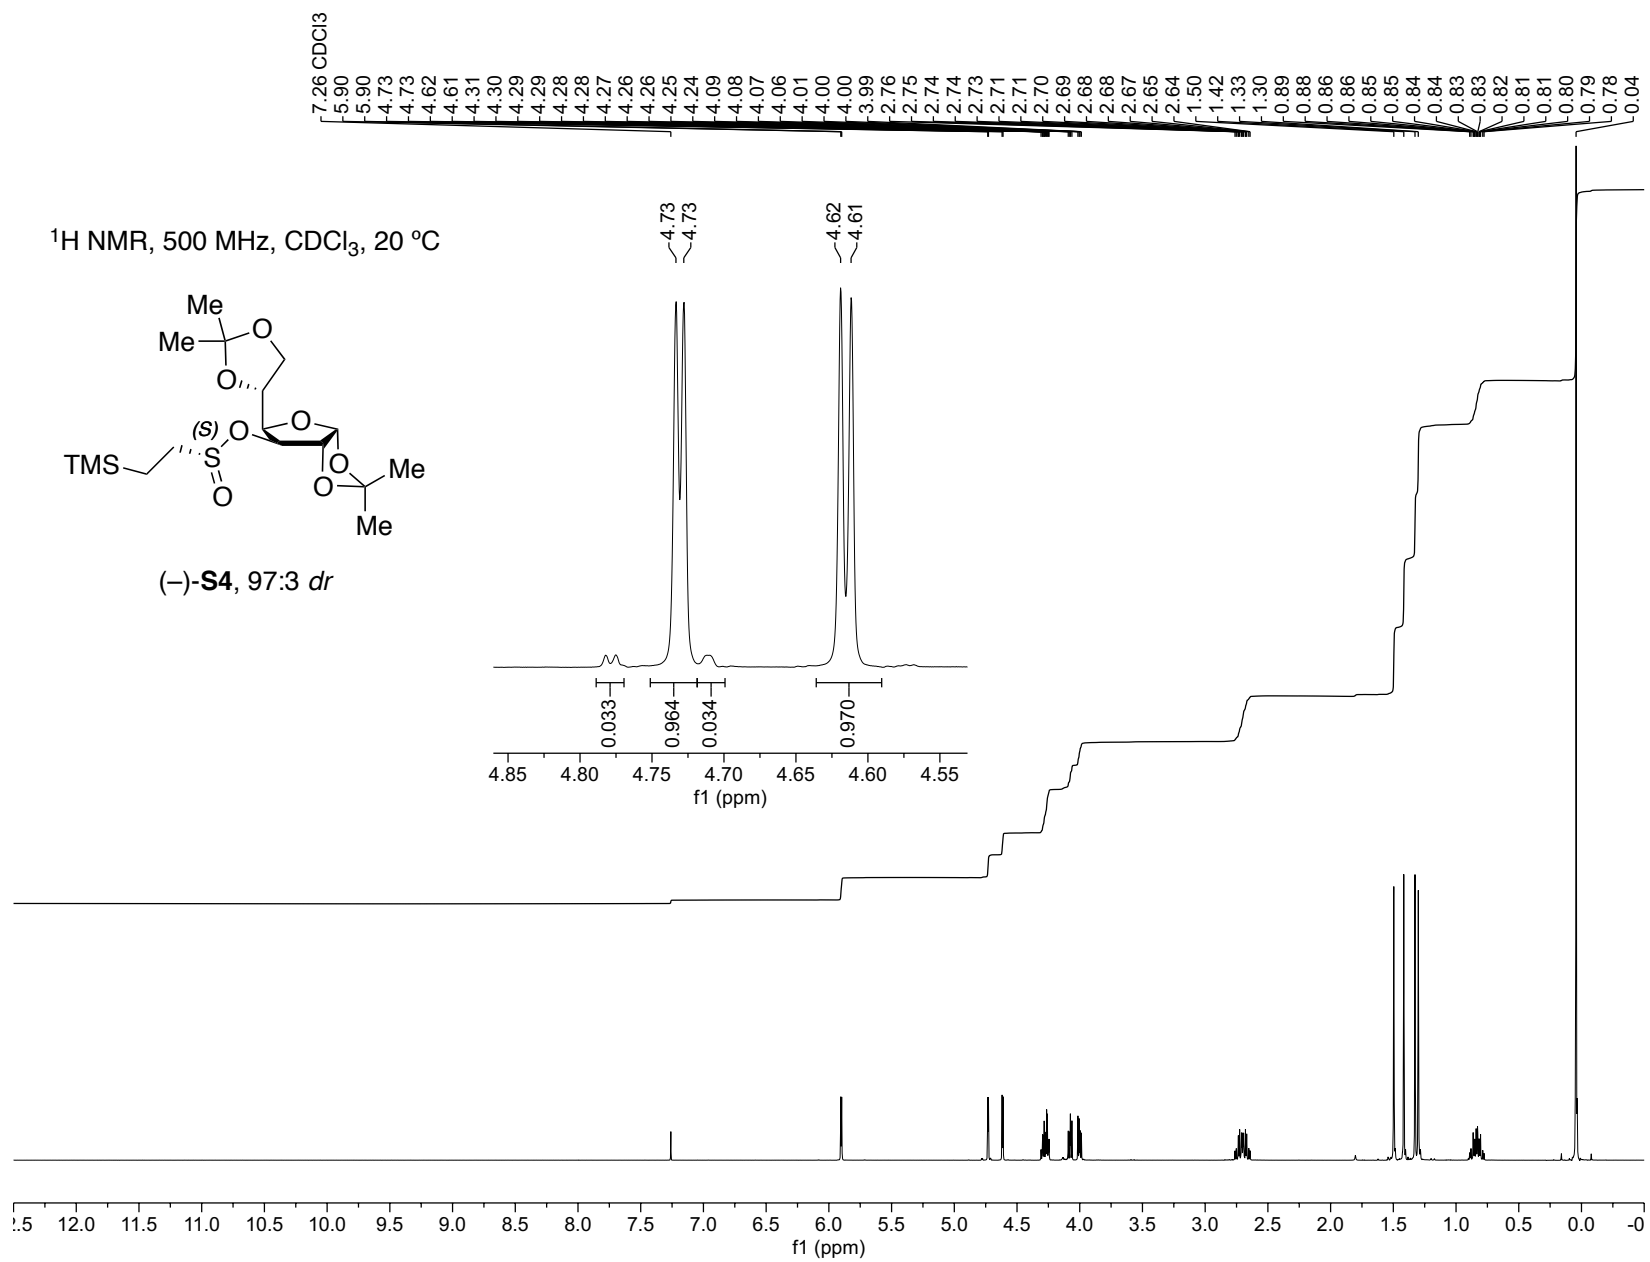

$^{13}\text{C}$  NMR, 151 MHz,  $\text{CDCl}_3$ , 20 °C

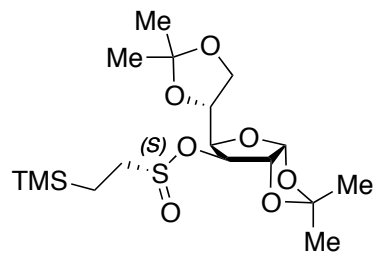

(-)-**S4**, 97:3 *dr*

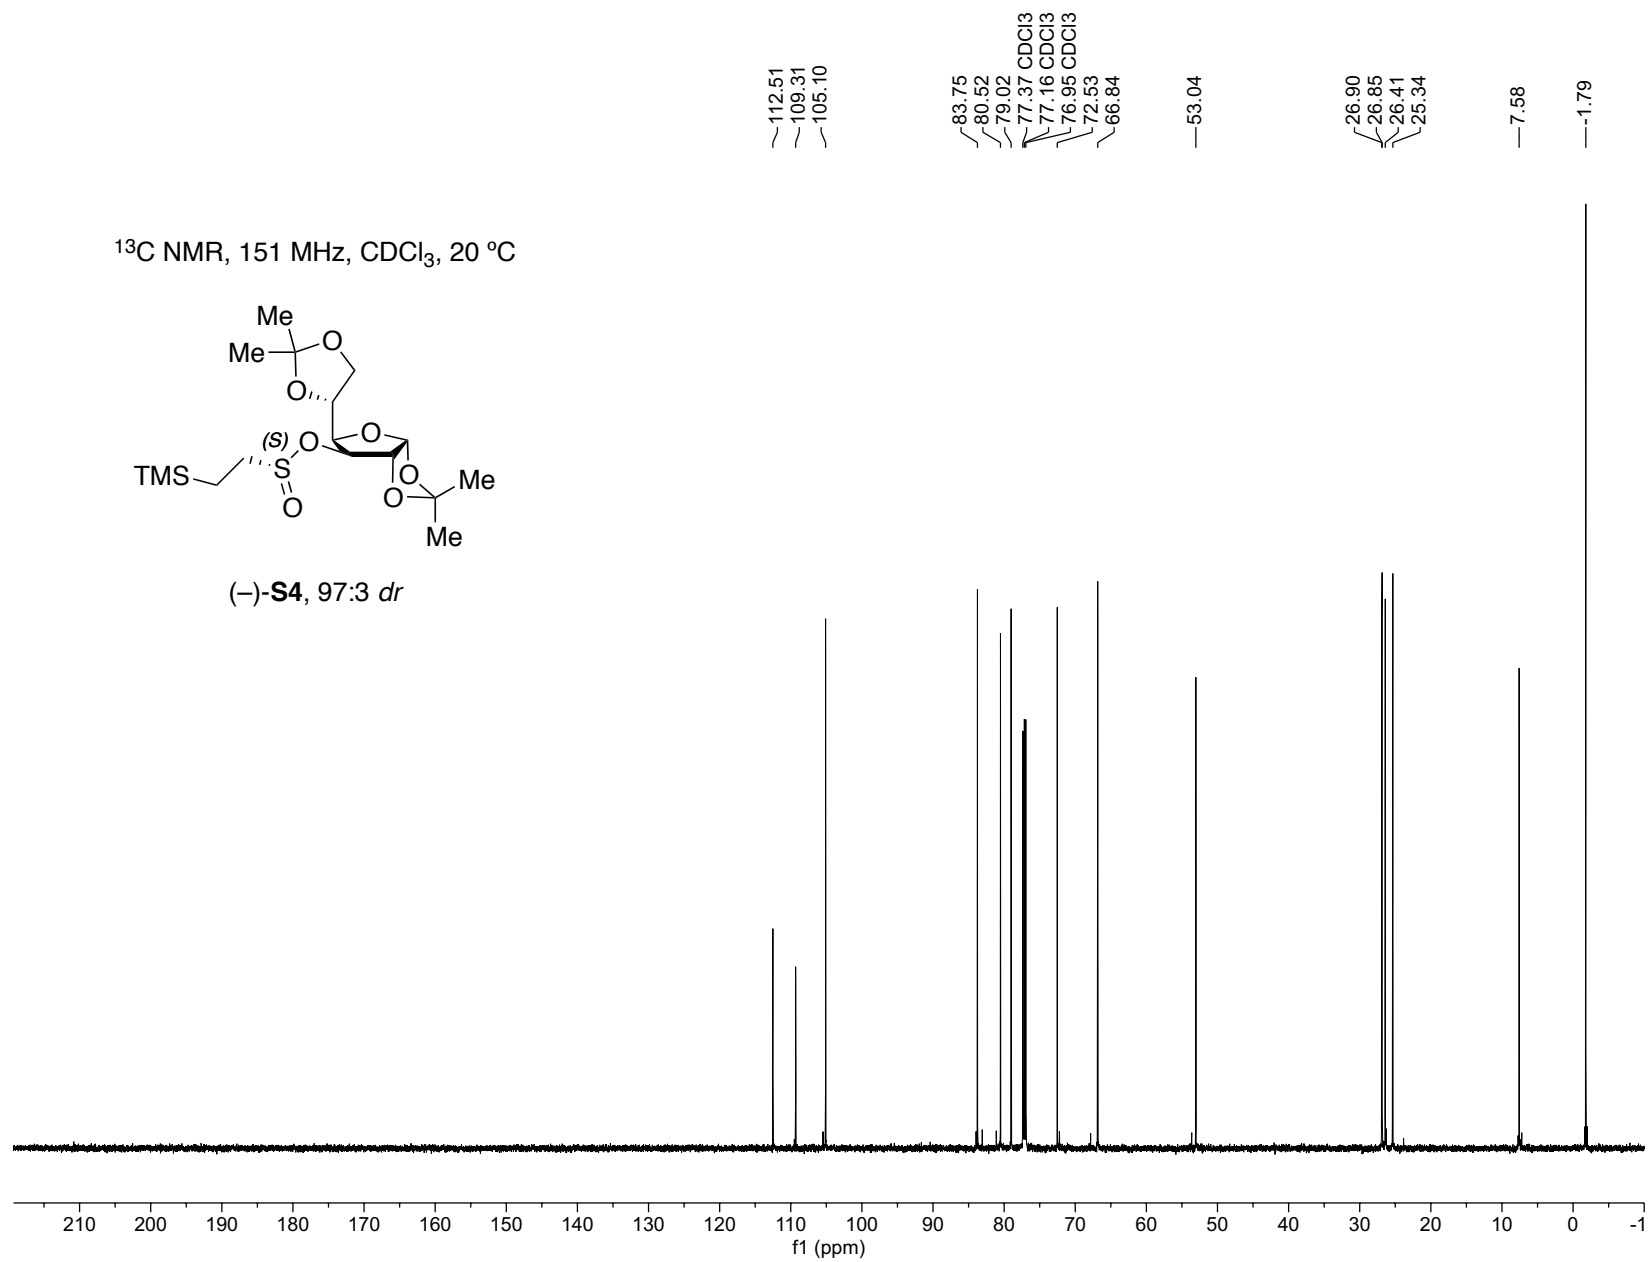

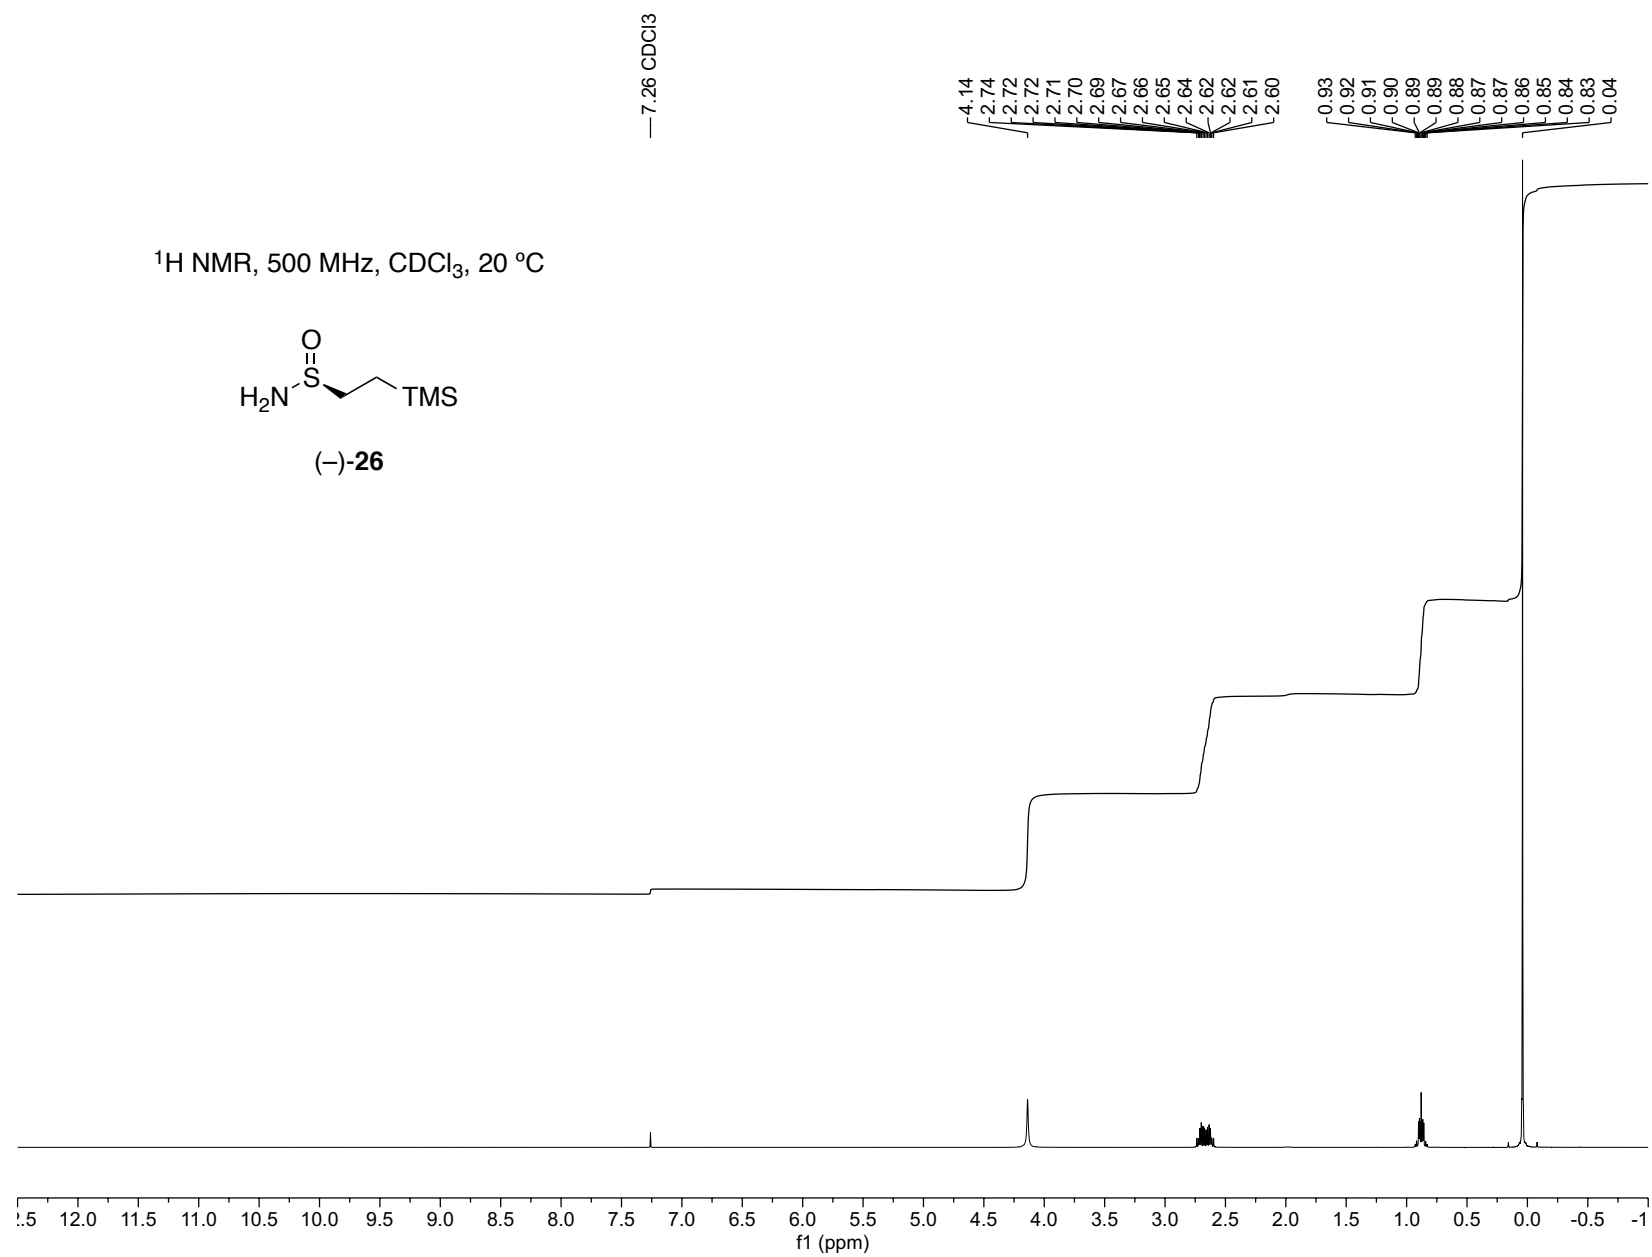

$^{13}\text{C}$  NMR, 126 MHz,  $\text{CDCl}_3$ , 20 °C

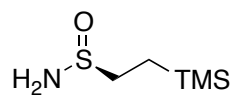

(-)-**26**

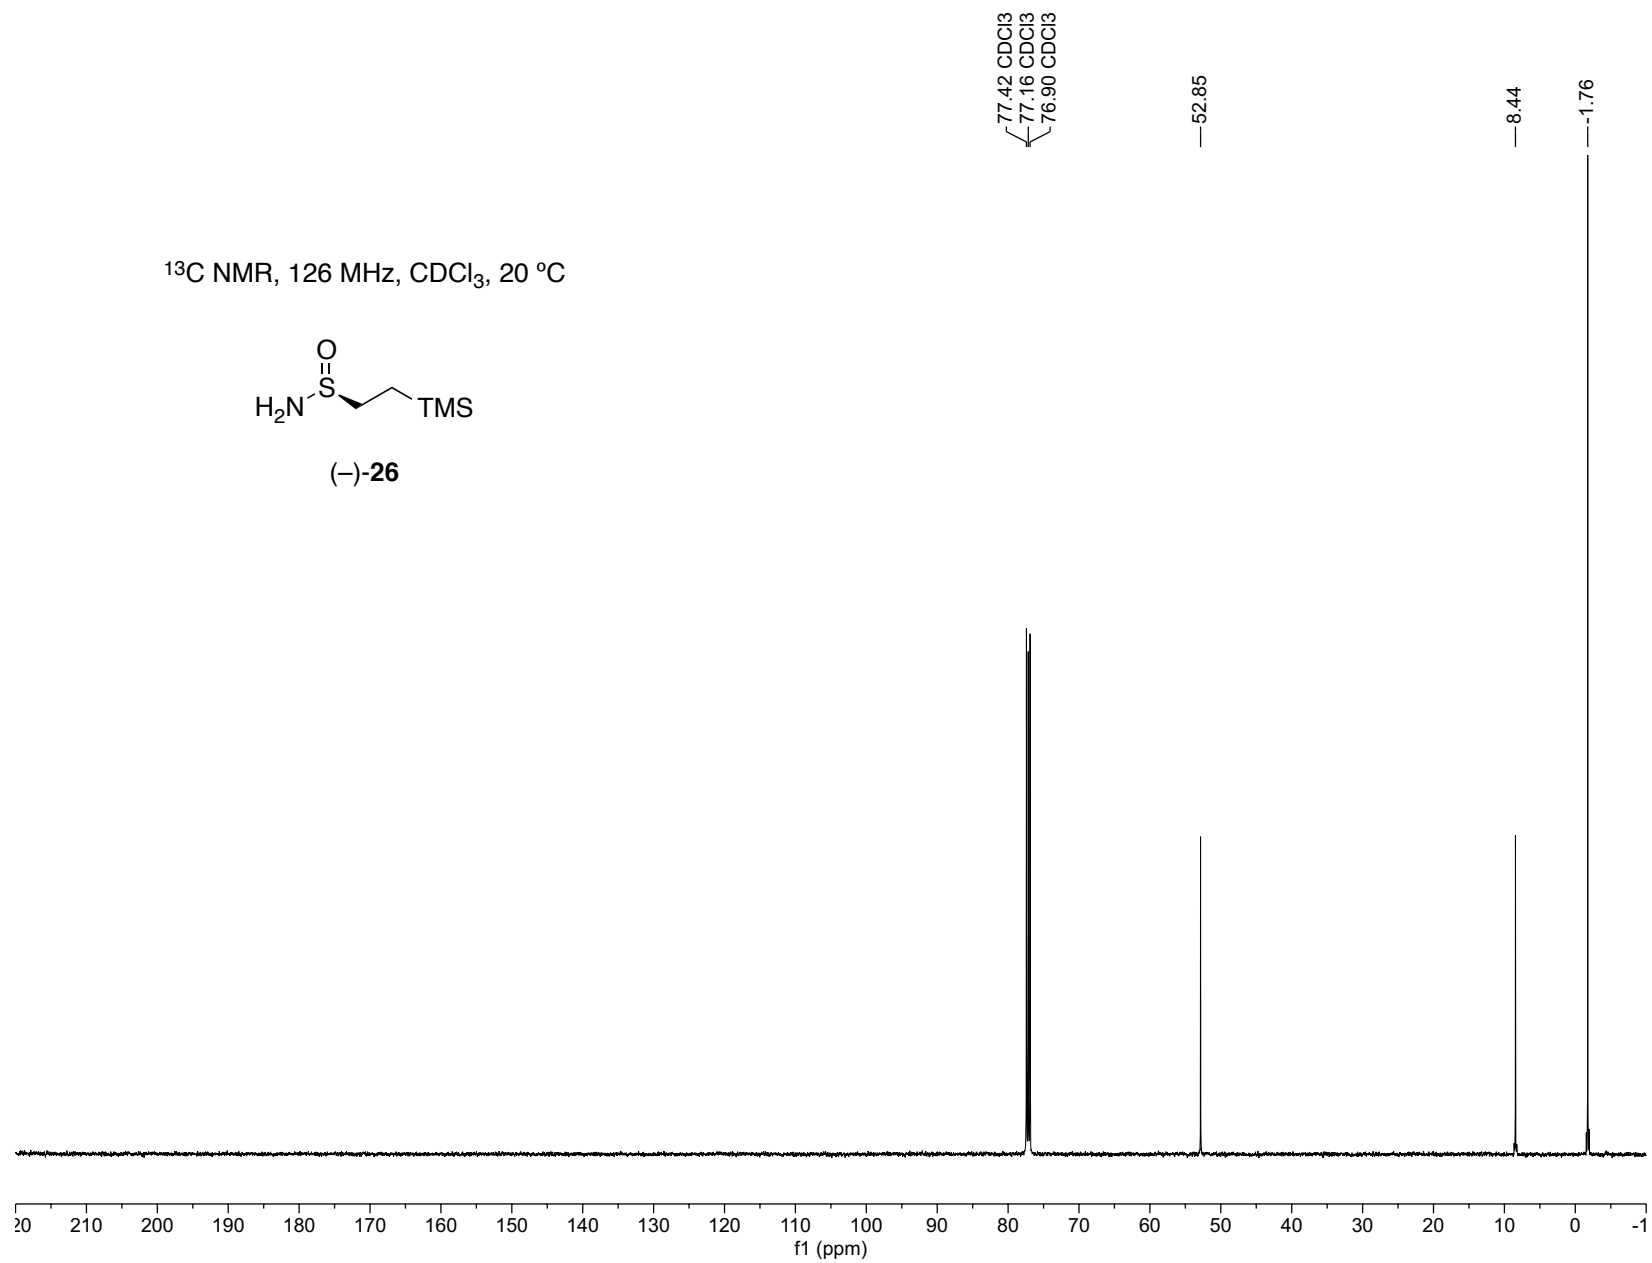

racemate

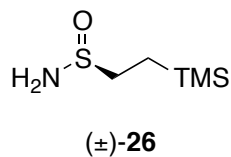

**HPLC conditions:**  
CHIRALPAK® OD-H, Lot# ODH0CE-KF021  
4% *i*-PrOH in hexanes  
1.0 mL/min  
 $\lambda = 210$  nm

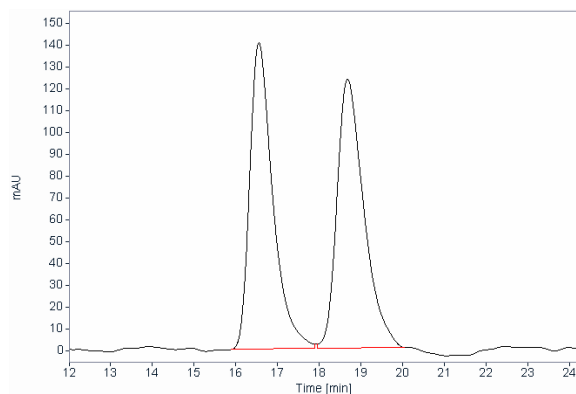

Signal: DAD1 C, Sig=210,8 Ref=360,100

| Ret. Time (min) | Area%   |
|-----------------|---------|
| 16.541          | 49.5636 |
| 18.669          | 50.4364 |

After flash chromatography:

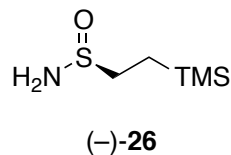

**HPLC conditions:**  
CHIRALPAK® OD-H, Lot# ODH0CE-KF021  
4% *i*-PrOH in hexanes  
1.0 mL/min  
 $\lambda = 210$  nm

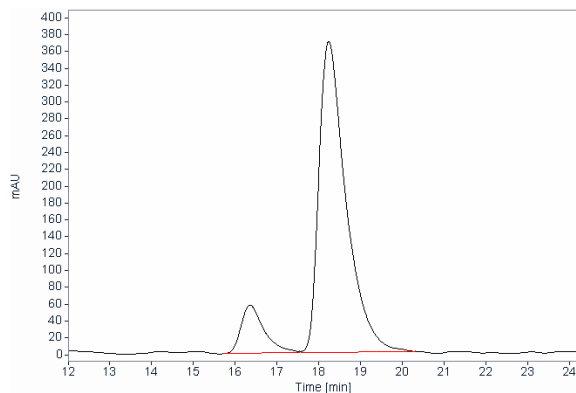

Signal: DAD1 C, Sig=210,8 Ref=360,100

| Ret. Time (min) | Area%   |
|-----------------|---------|
| 16.343          | 11.8066 |
| 18.226          | 88.1934 |

After heptane trituration:

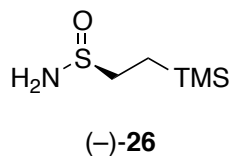

**HPLC conditions:**  
CHIRALPAK® OD-H, Lot# ODH0CE-KF021  
4% *i*-PrOH in hexanes  
1.0 mL/min  
 $\lambda = 210$  nm

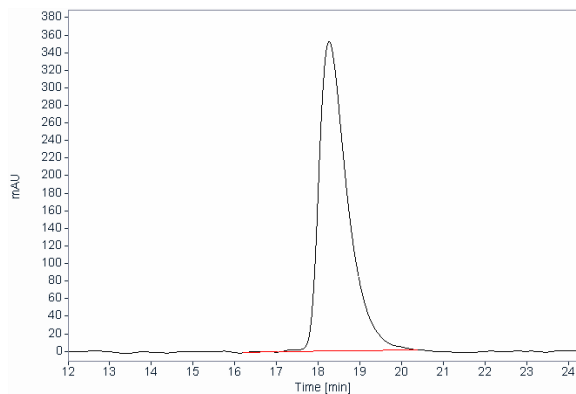

Signal: DAD1 C, Sig=210,8 Ref=360,100

| Ret. Time (min) | Area%   |
|-----------------|---------|
| 16.518          | 0.2878  |
| 18.248          | 99.7122 |

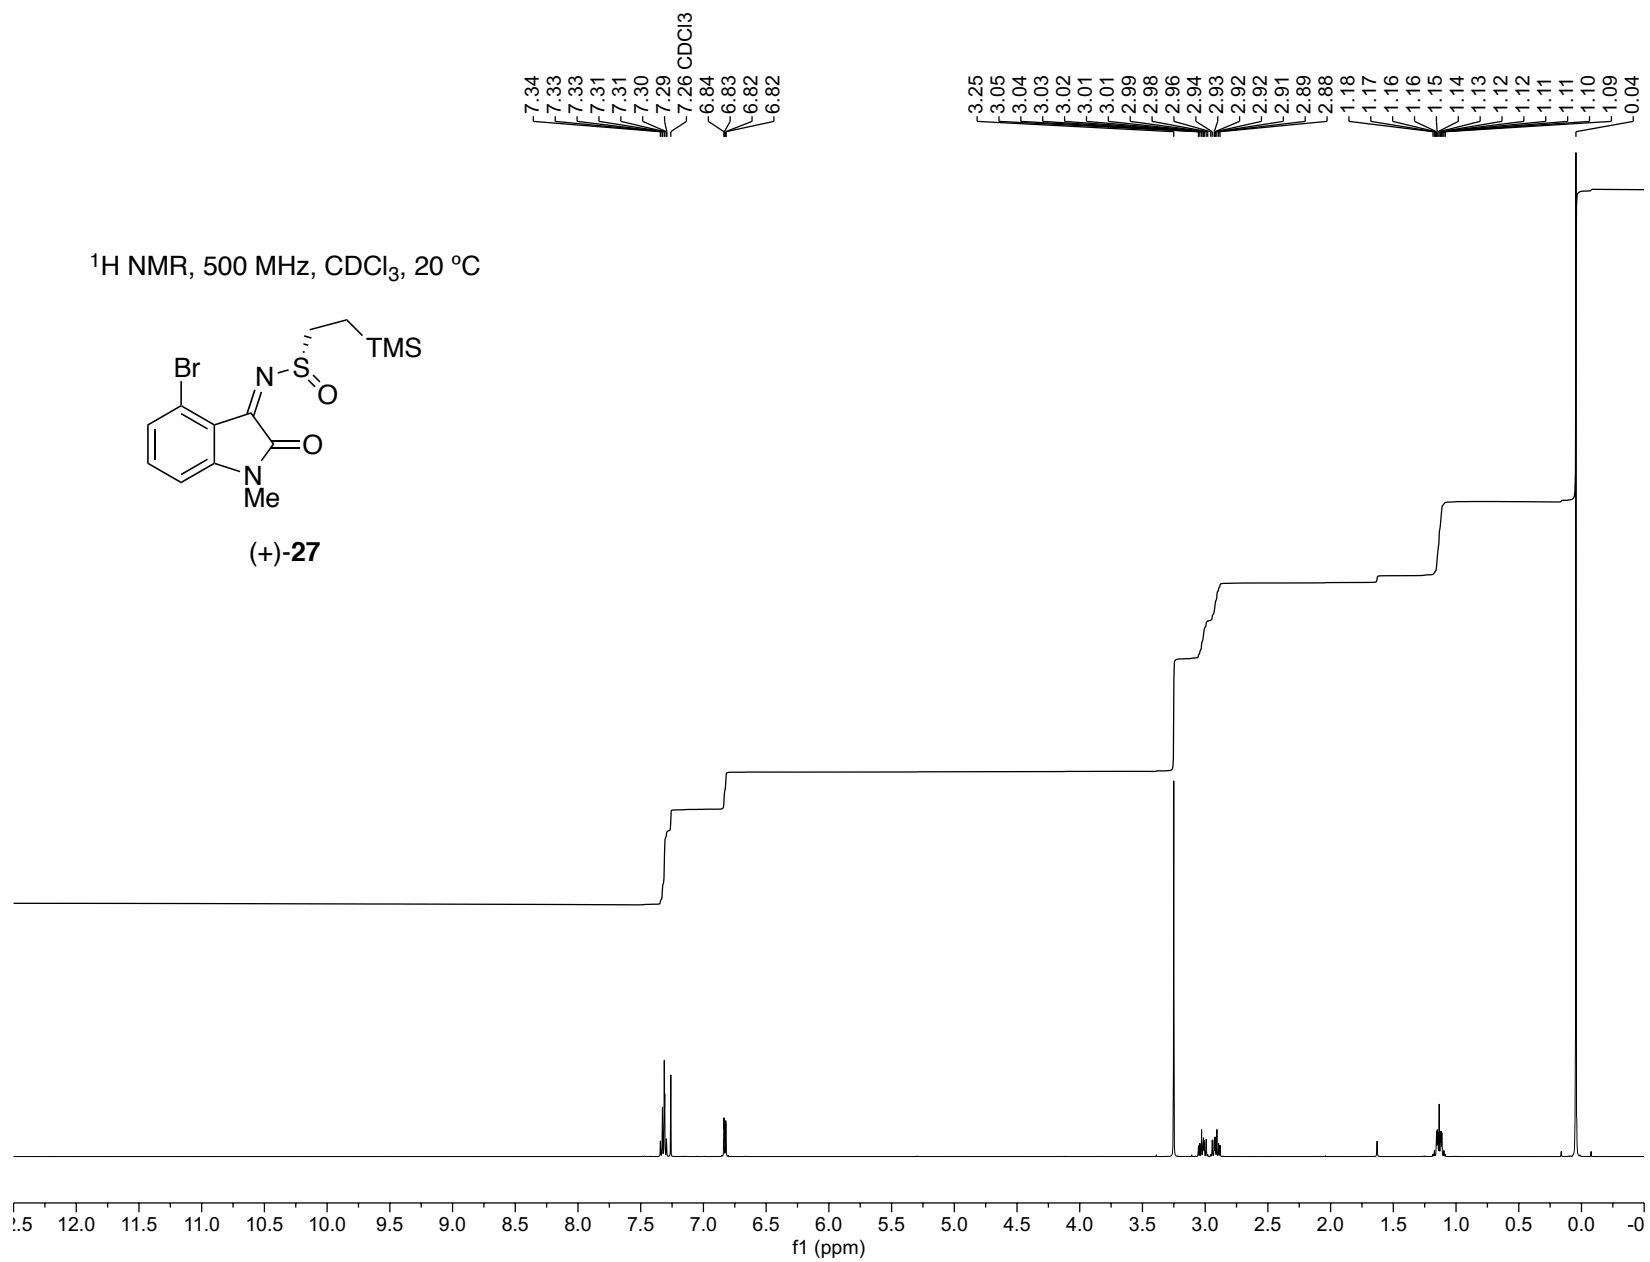

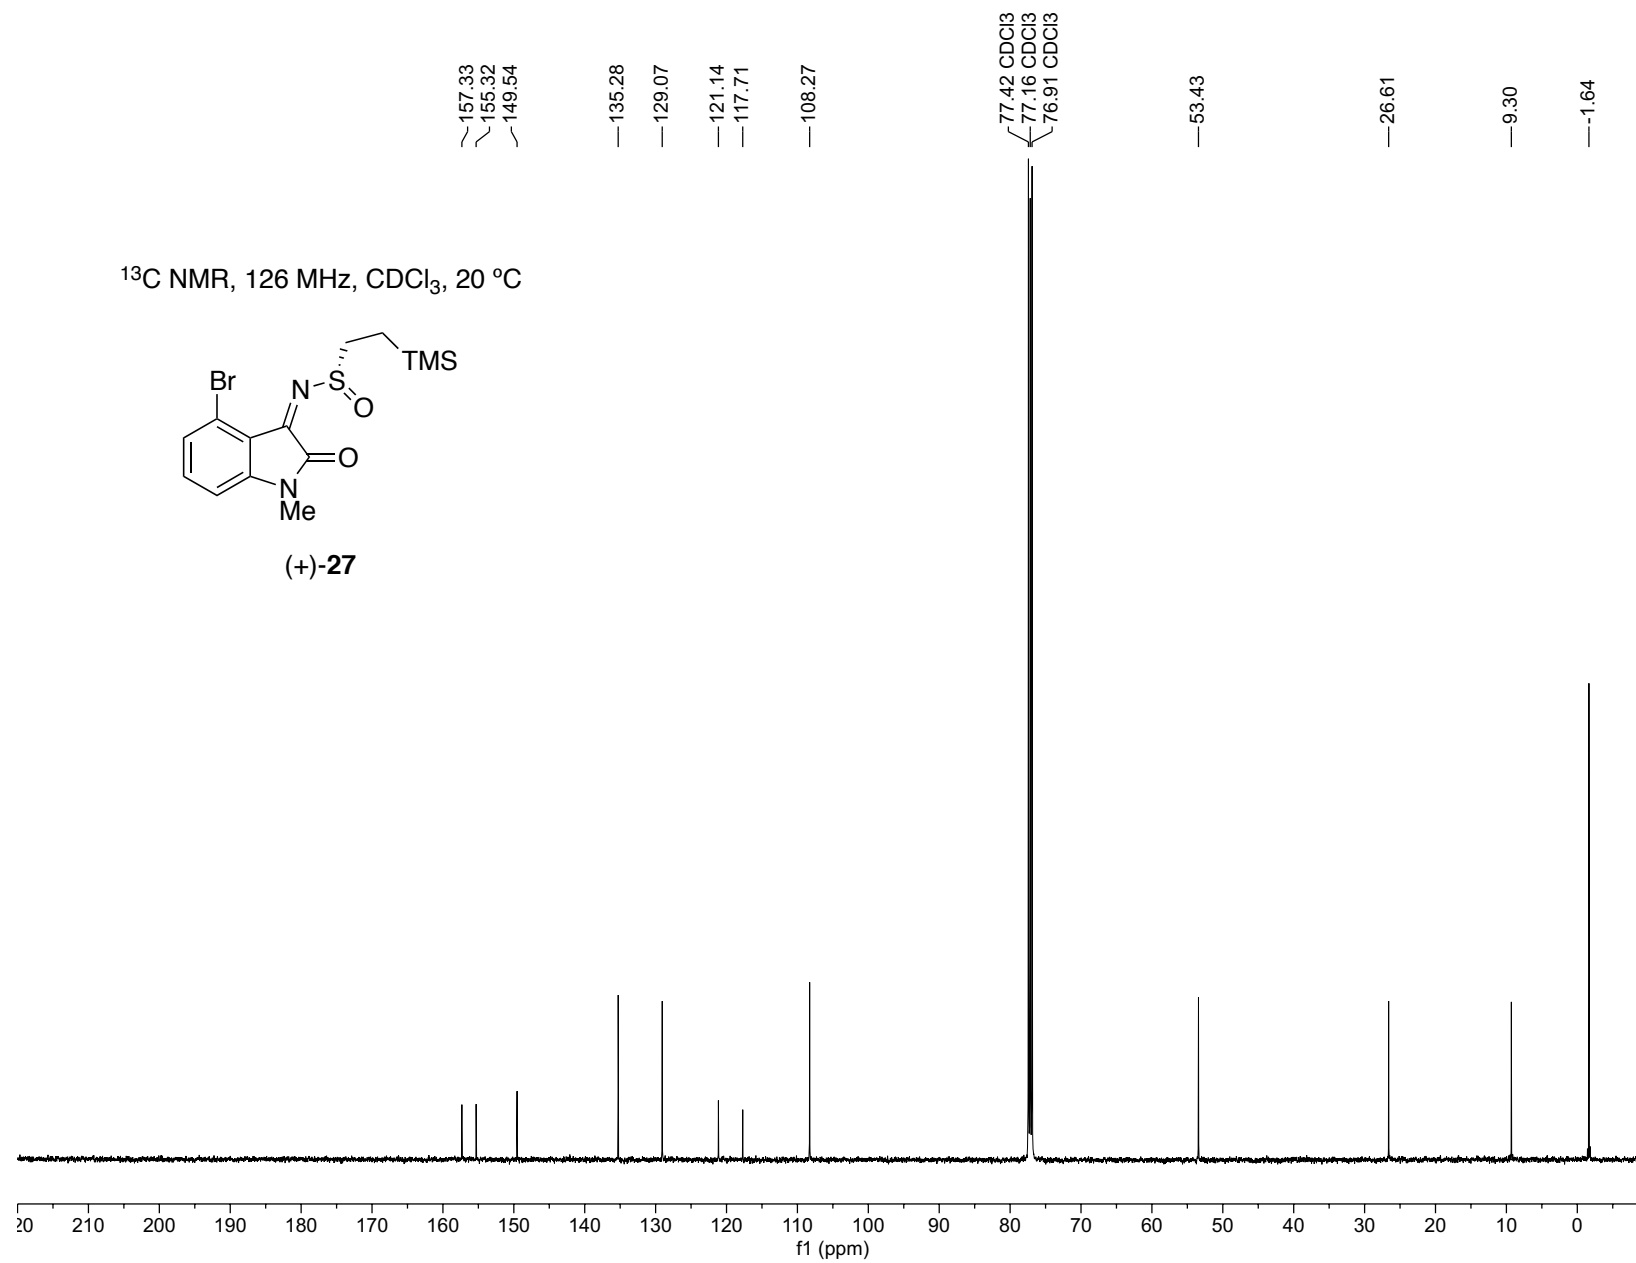

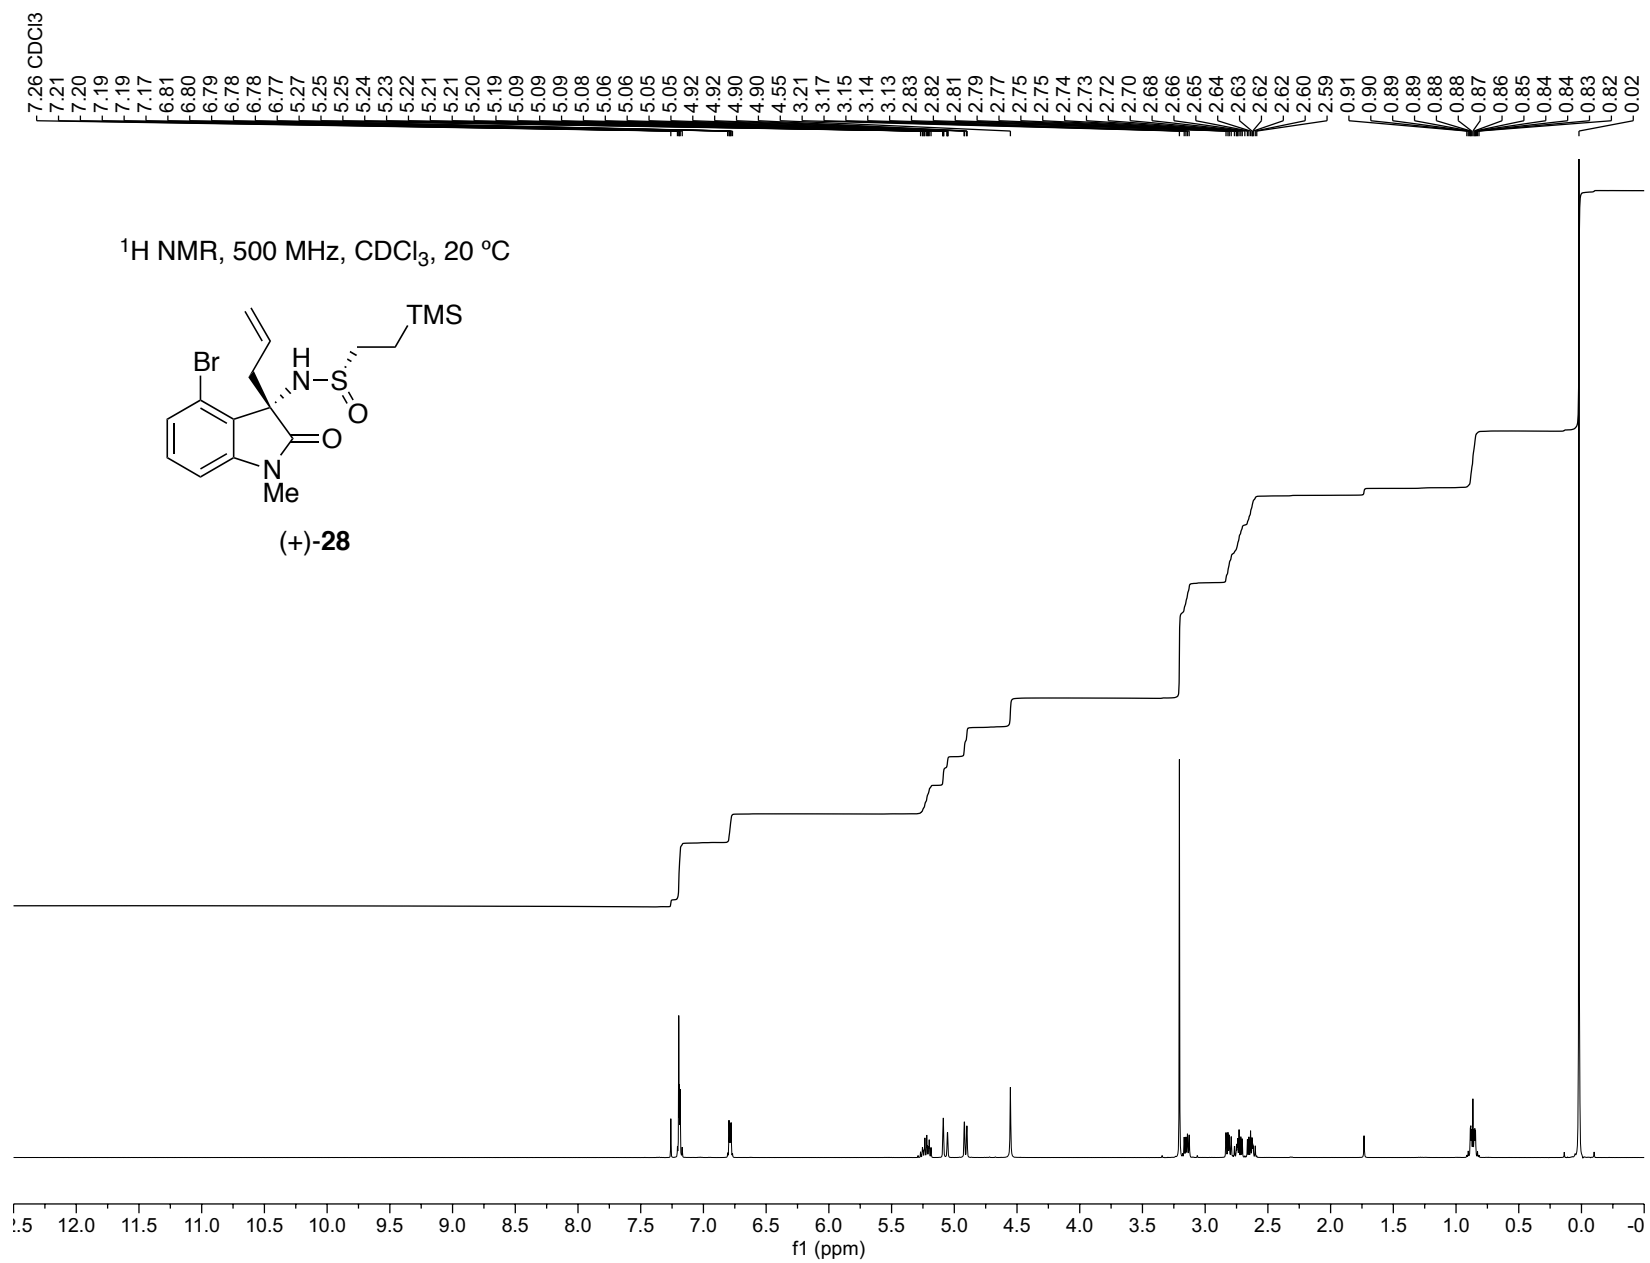



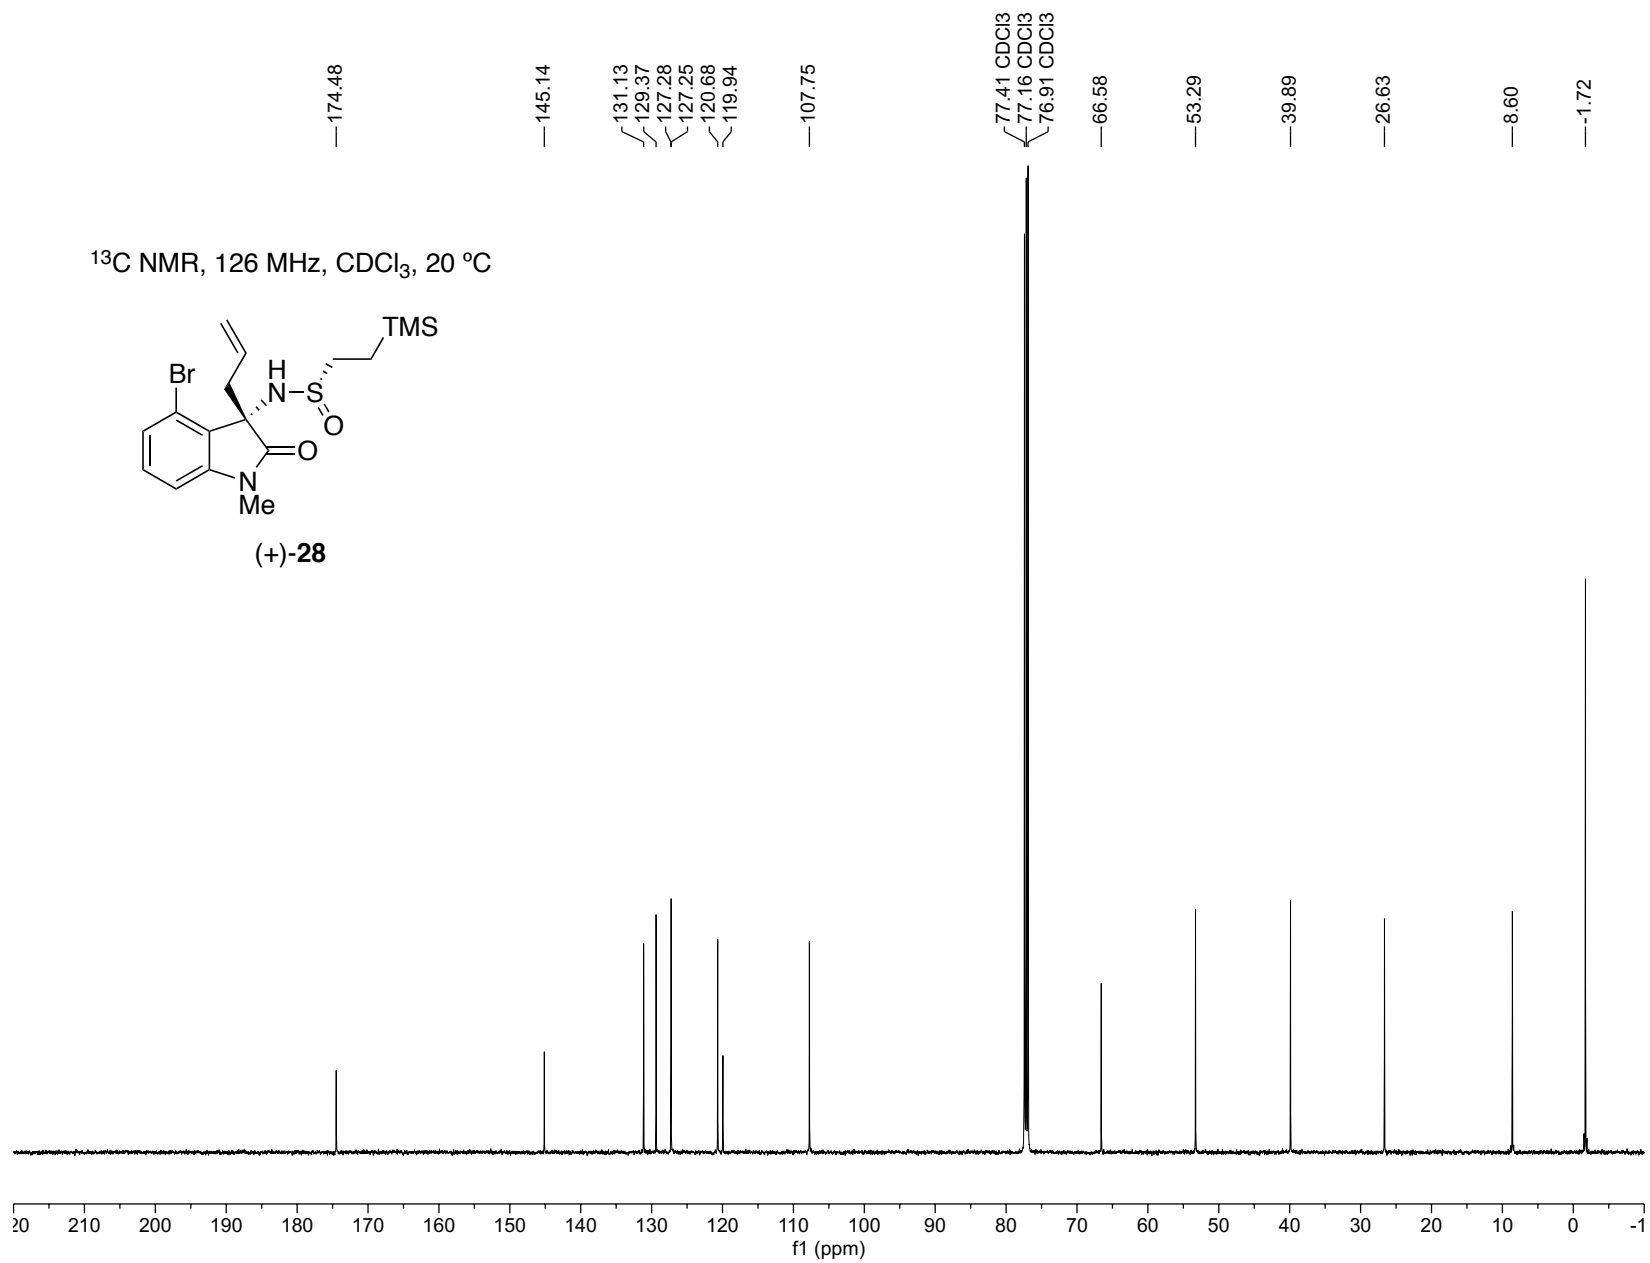

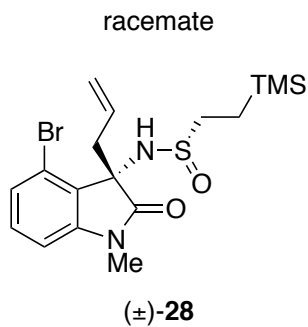

**HPLC conditions:**  
CHIRALPAK® OD-H, Lot# ODH0CE-KF021  
30% *i*-PrOH in hexanes  
0.7 mL/min  
 $\lambda = 220$  nm

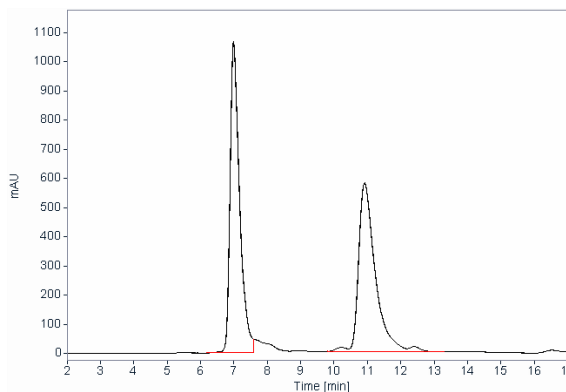

Signal: DAD1 B, Sig=220,16 Ref=360,100

| Ret. Time (min) | Area%   |
|-----------------|---------|
| 6.976           | 50.6693 |
| 10.909          | 49.3307 |

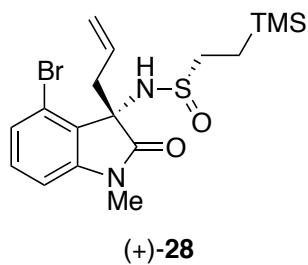

**HPLC conditions:**  
CHIRALPAK® OD-H, Lot# ODH0CE-KF021  
30% *i*-PrOH in hexanes  
0.7 mL/min  
 $\lambda = 220$  nm

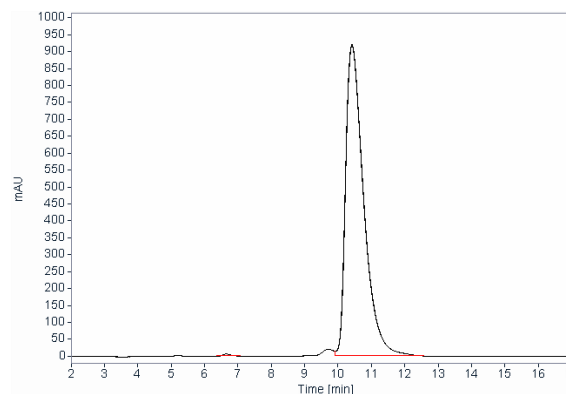

Signal: DAD1 B, Sig=220,16 Ref=360,100

| Ret. Time (min) | Area%   |
|-----------------|---------|
| 6.638           | 0.2943  |
| 10.406          | 99.7057 |

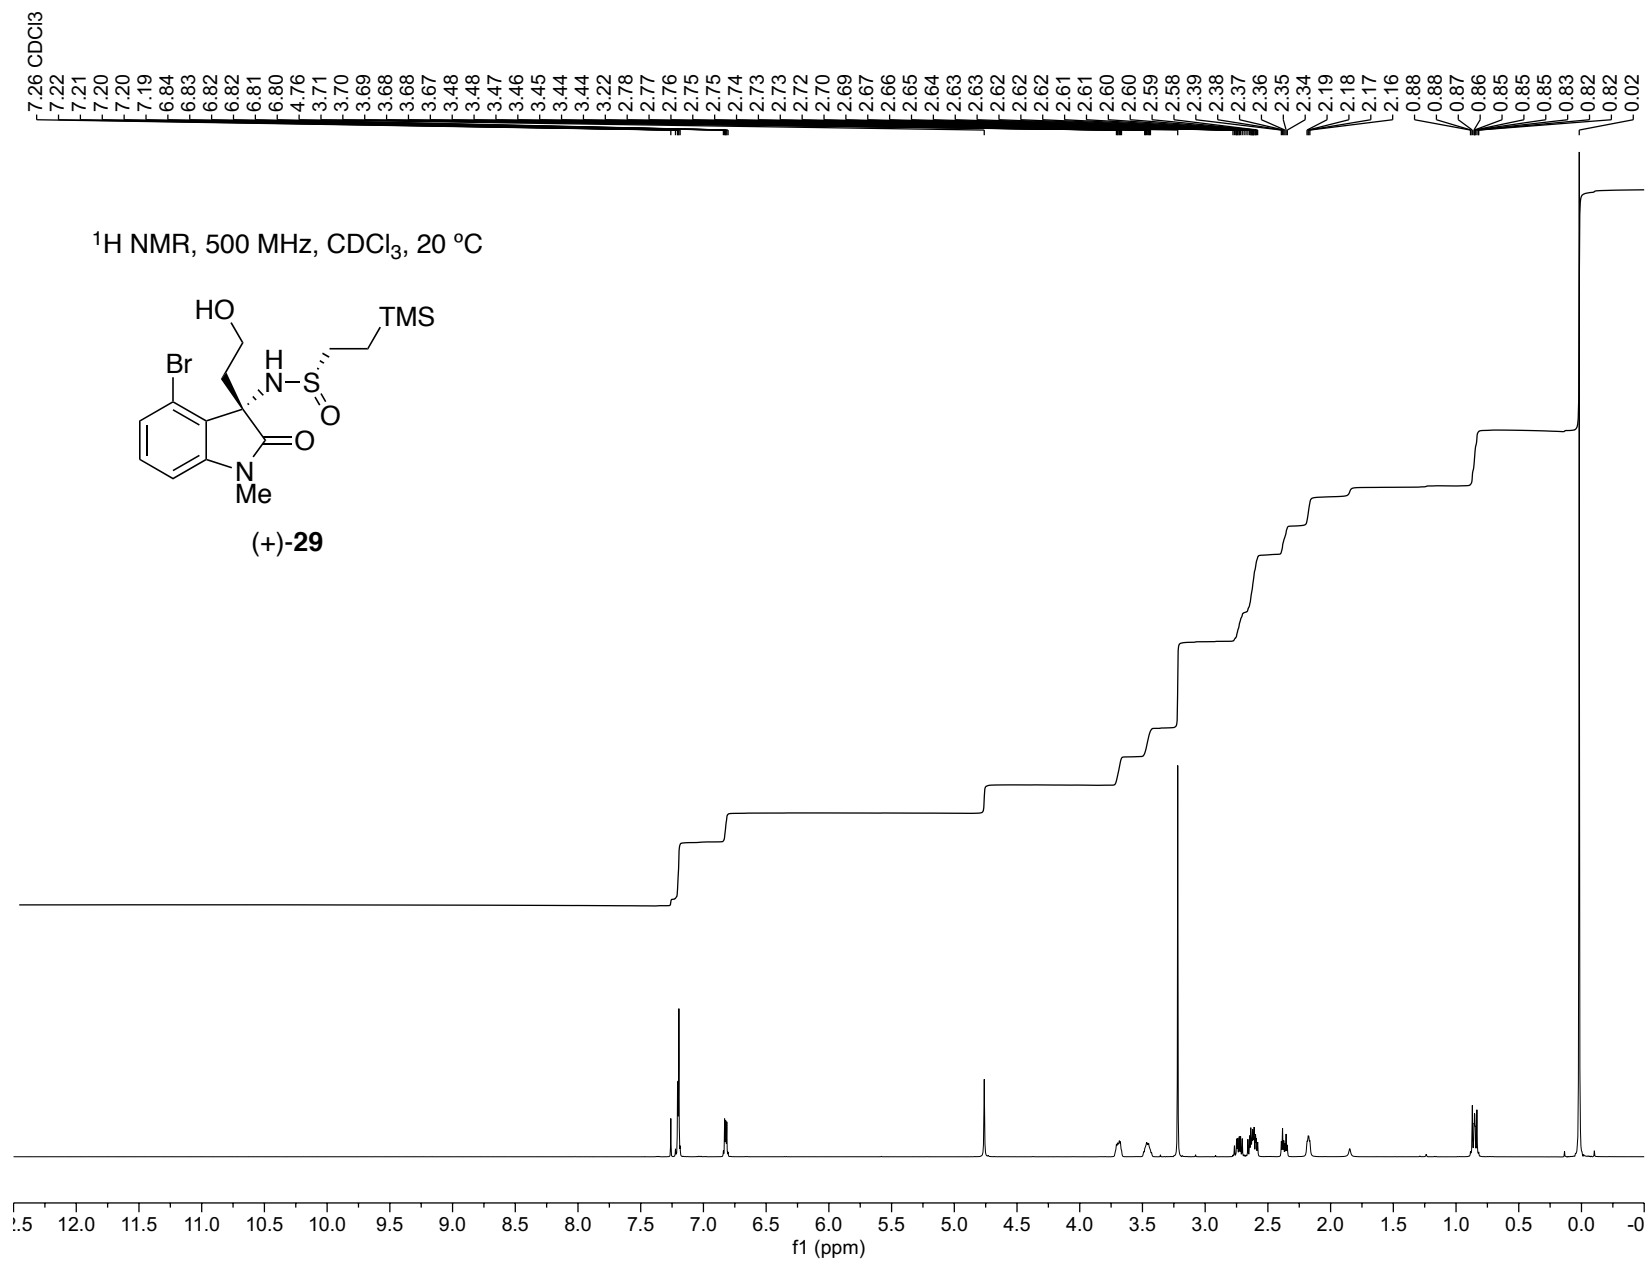

$^{13}\text{C}$  NMR, 126 MHz,  $\text{CDCl}_3$ , 20 °C

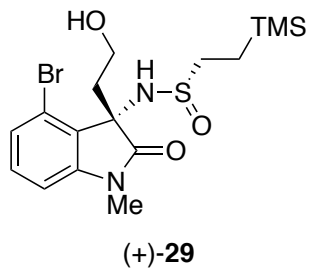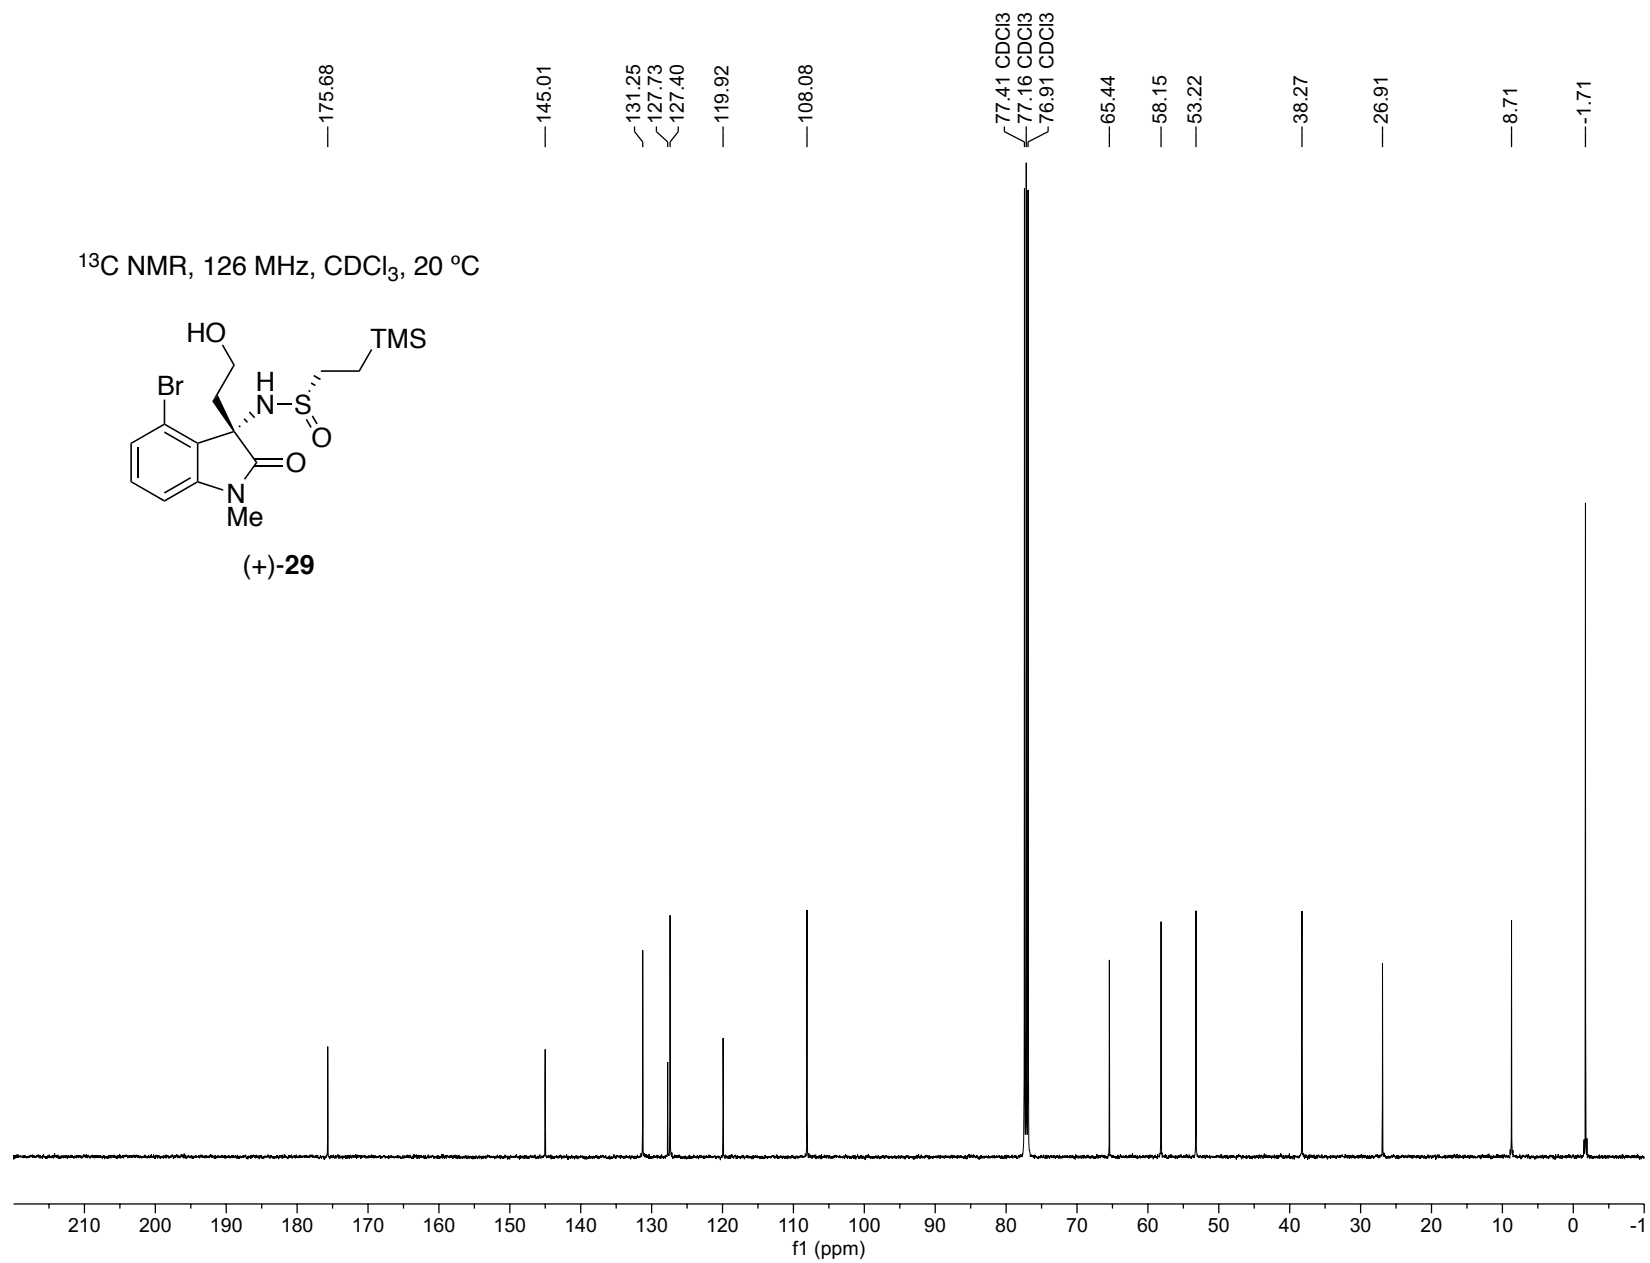

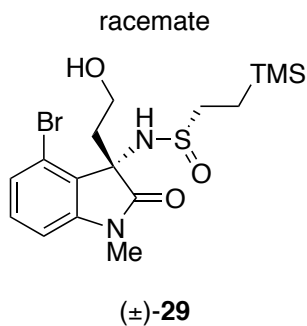

**HPLC conditions:**  
CHIRALPAK® OD-H, Lot# ODH0CE-KF021  
30% *i*-PrOH in hexanes  
0.7 mL/min  
 $\lambda = 220$  nm

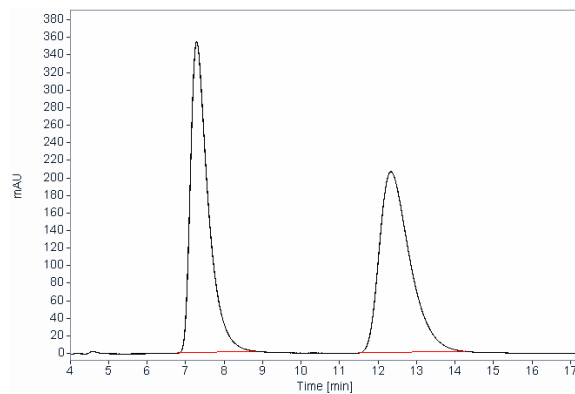

Signal: DAD1 B, Sig=220,16 Ref=360,100

| Ret. Time (min) | Area%   |
|-----------------|---------|
| 7.278           | 49.9198 |
| 12.323          | 50.0802 |

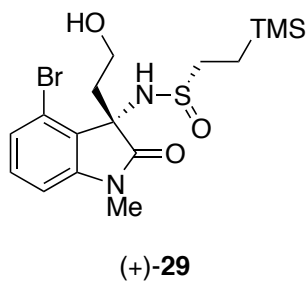

**HPLC conditions:**  
CHIRALPAK® OD-H, Lot# ODH0CE-KF021  
30% *i*-PrOH in hexanes  
0.7 mL/min  
 $\lambda = 220$  nm

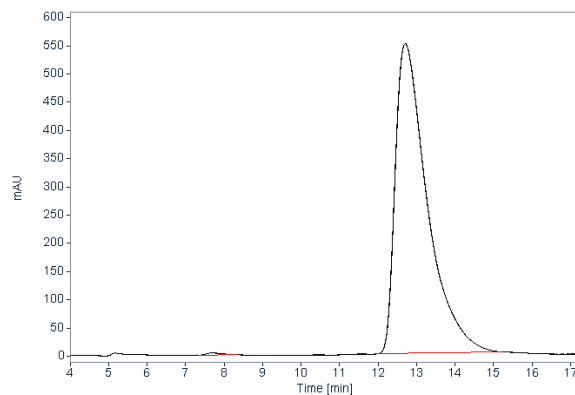

Signal: DAD1 B, Sig=220,16 Ref=360,100

| Ret. Time (min) | Area%   |
|-----------------|---------|
| 7.687           | 0.4002  |
| 12.697          | 99.5998 |

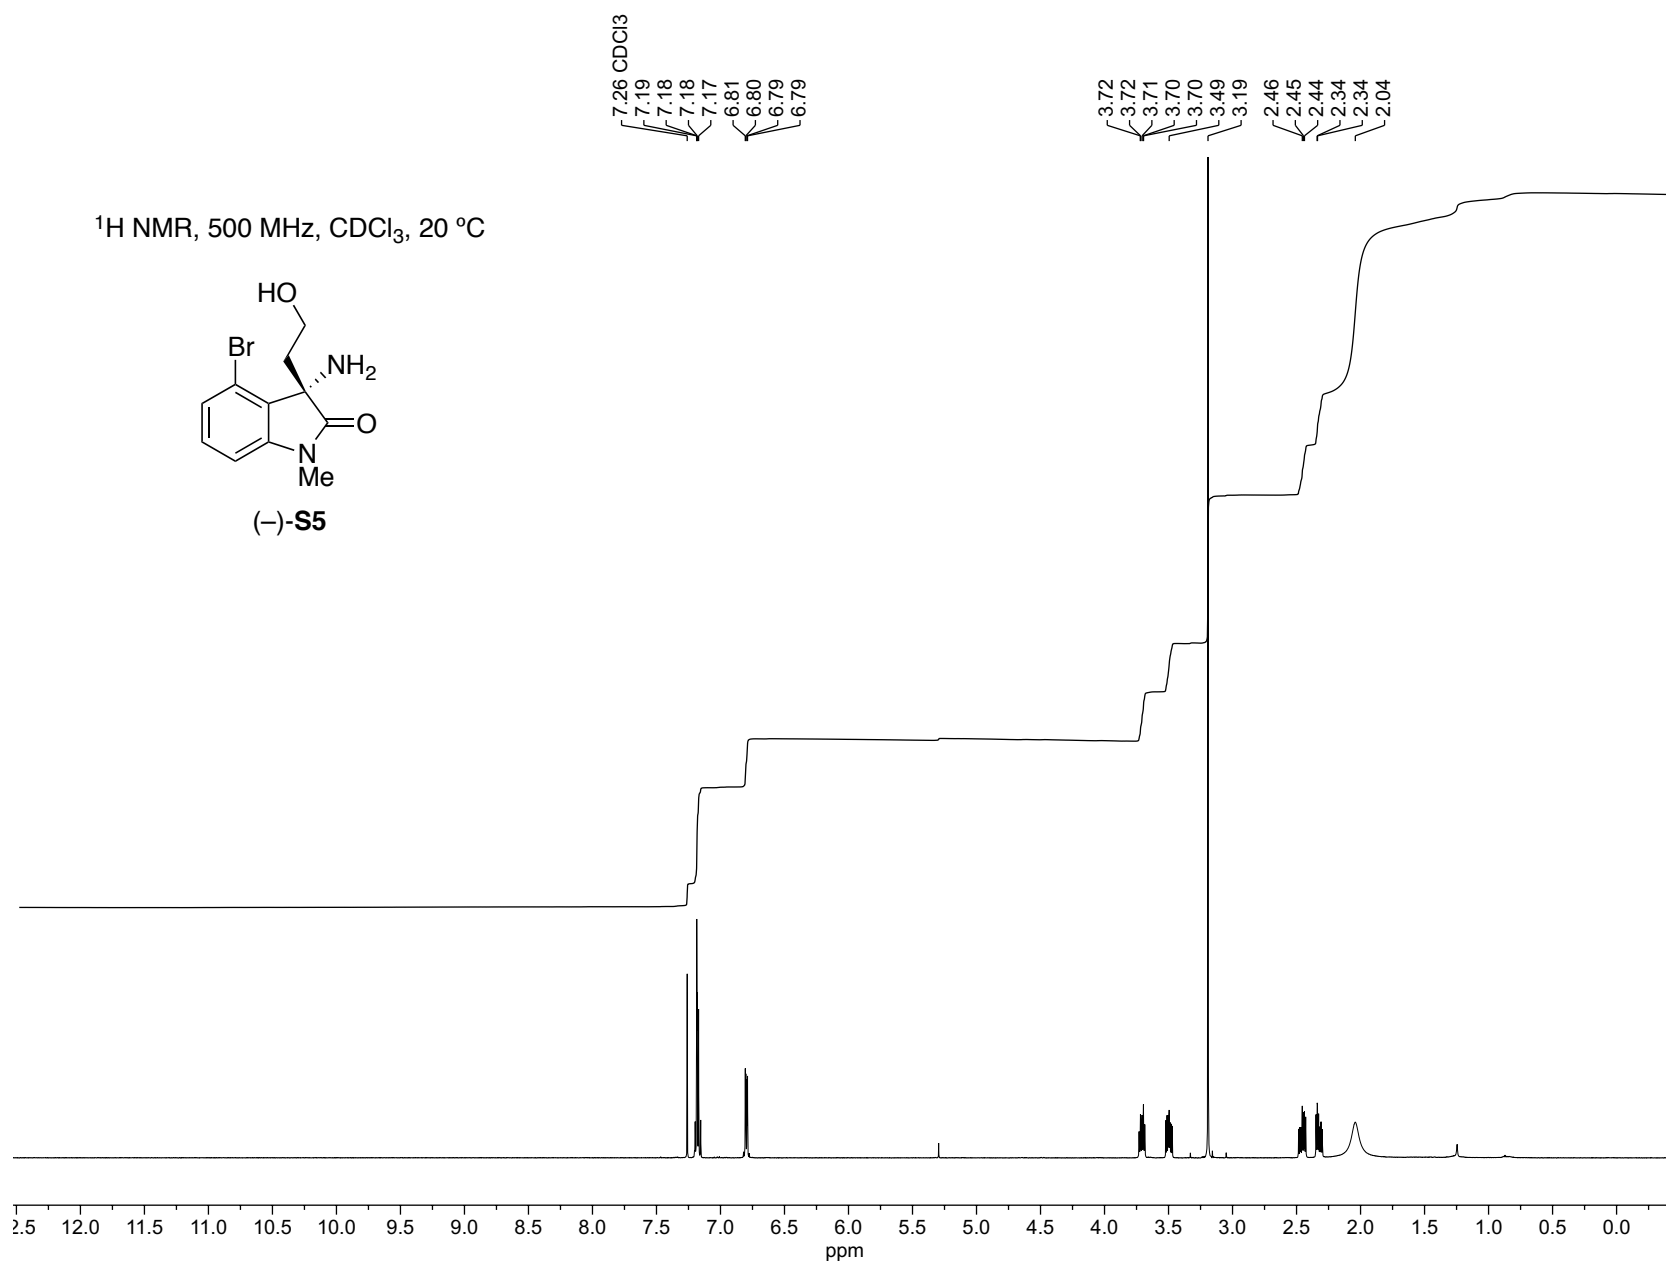

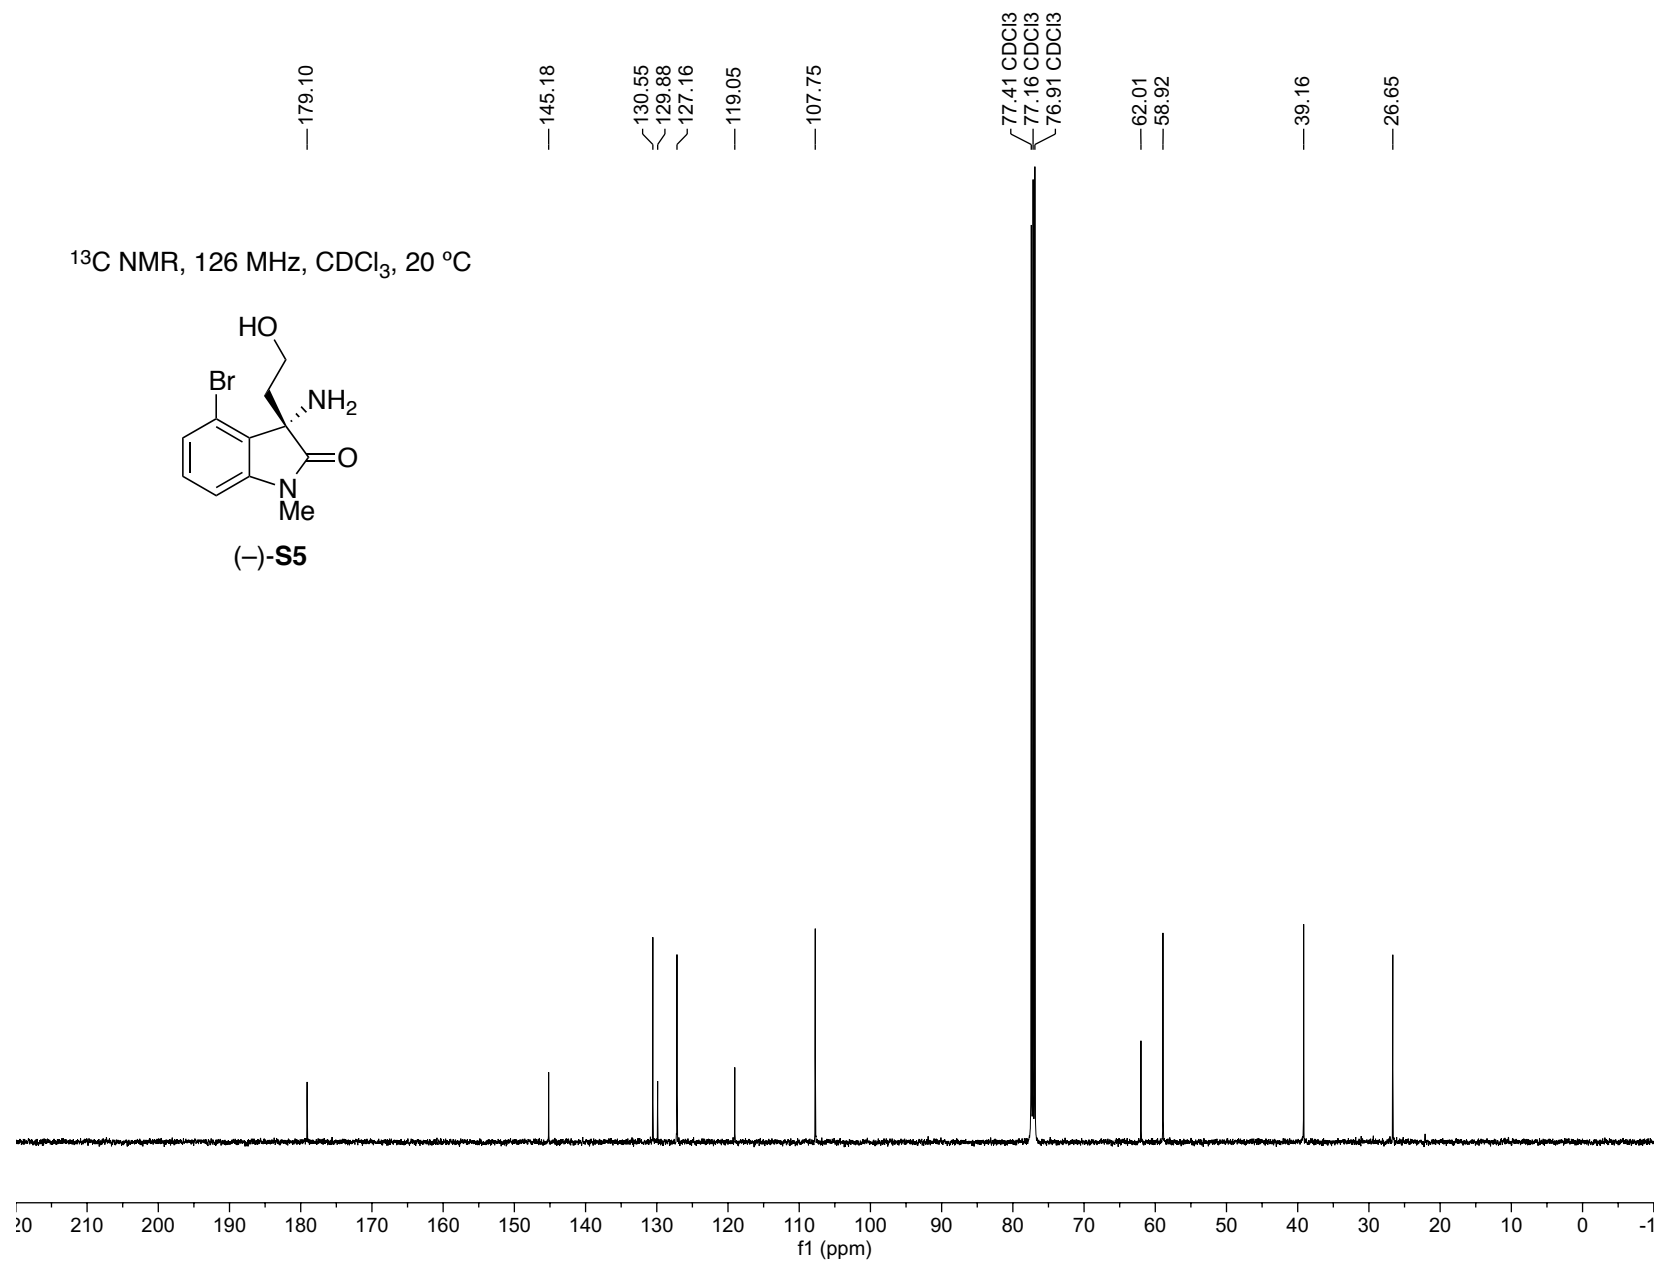

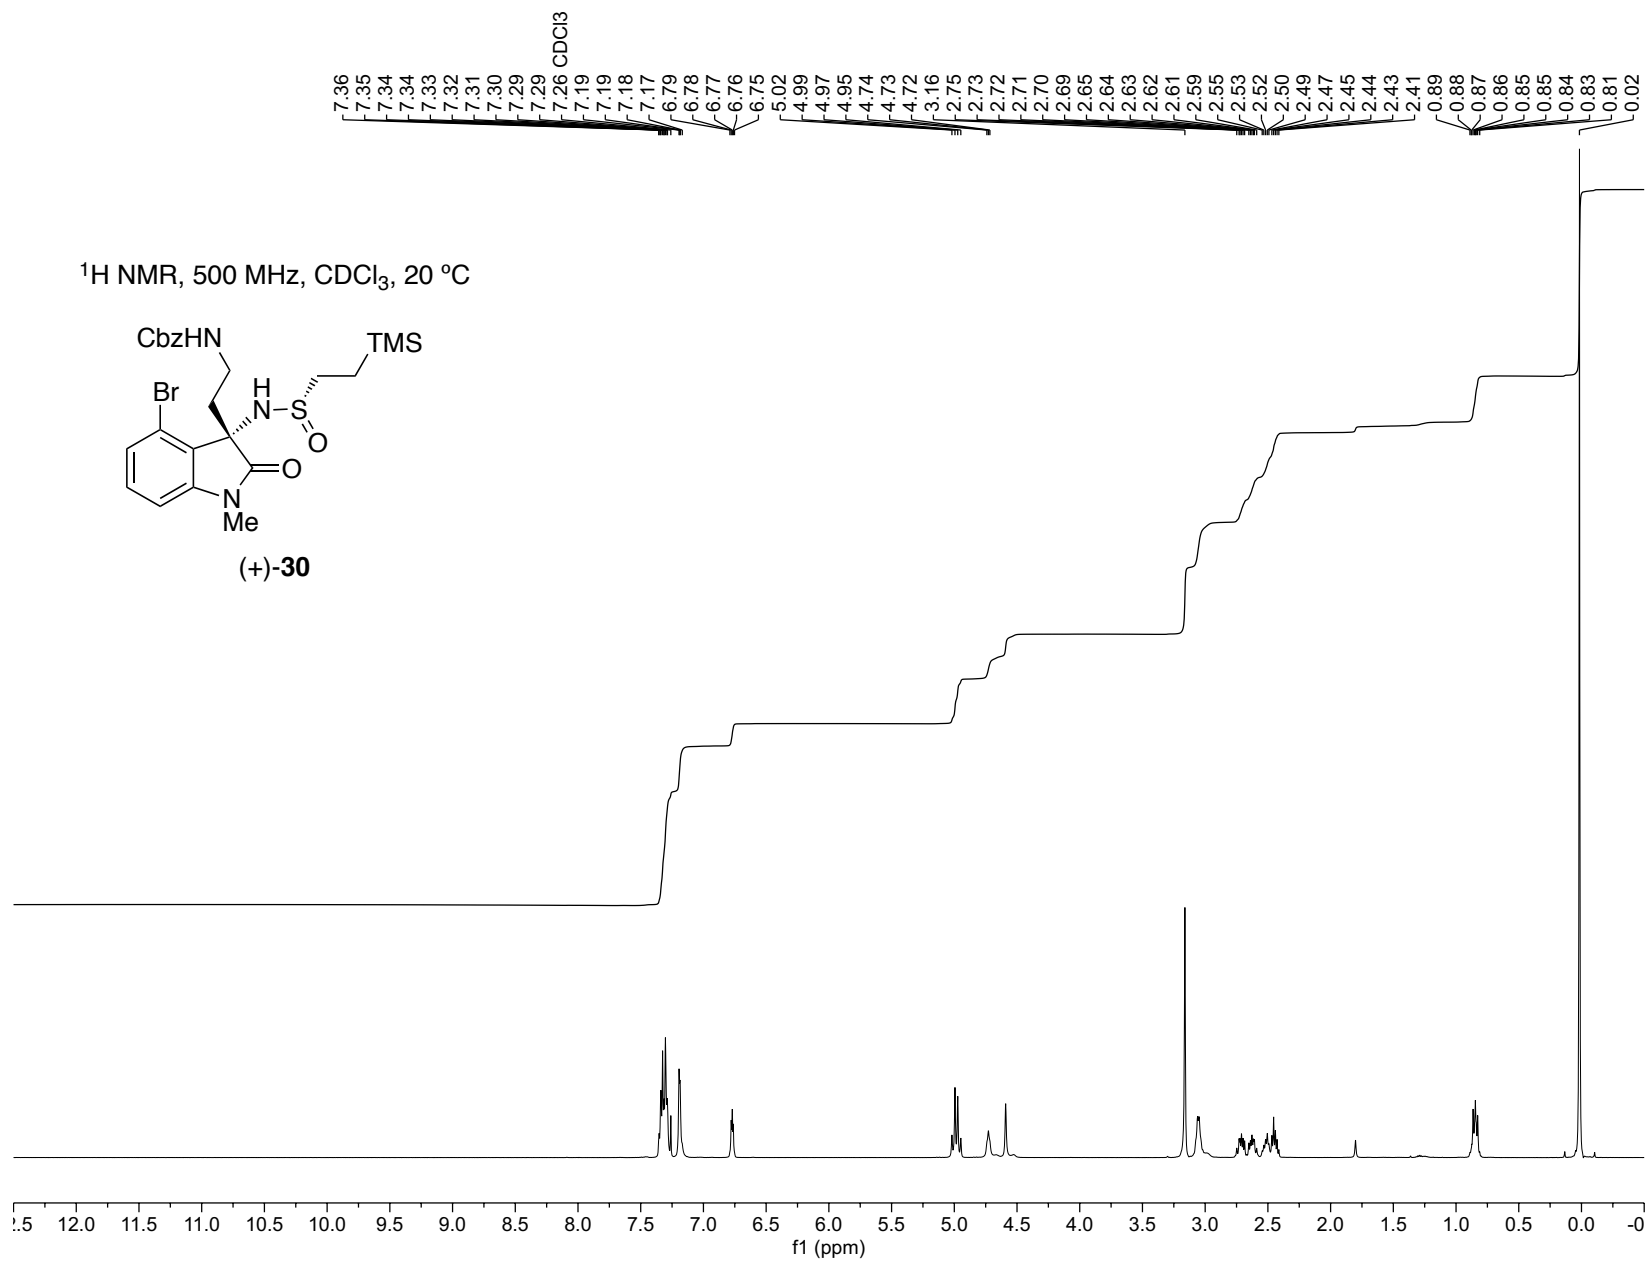



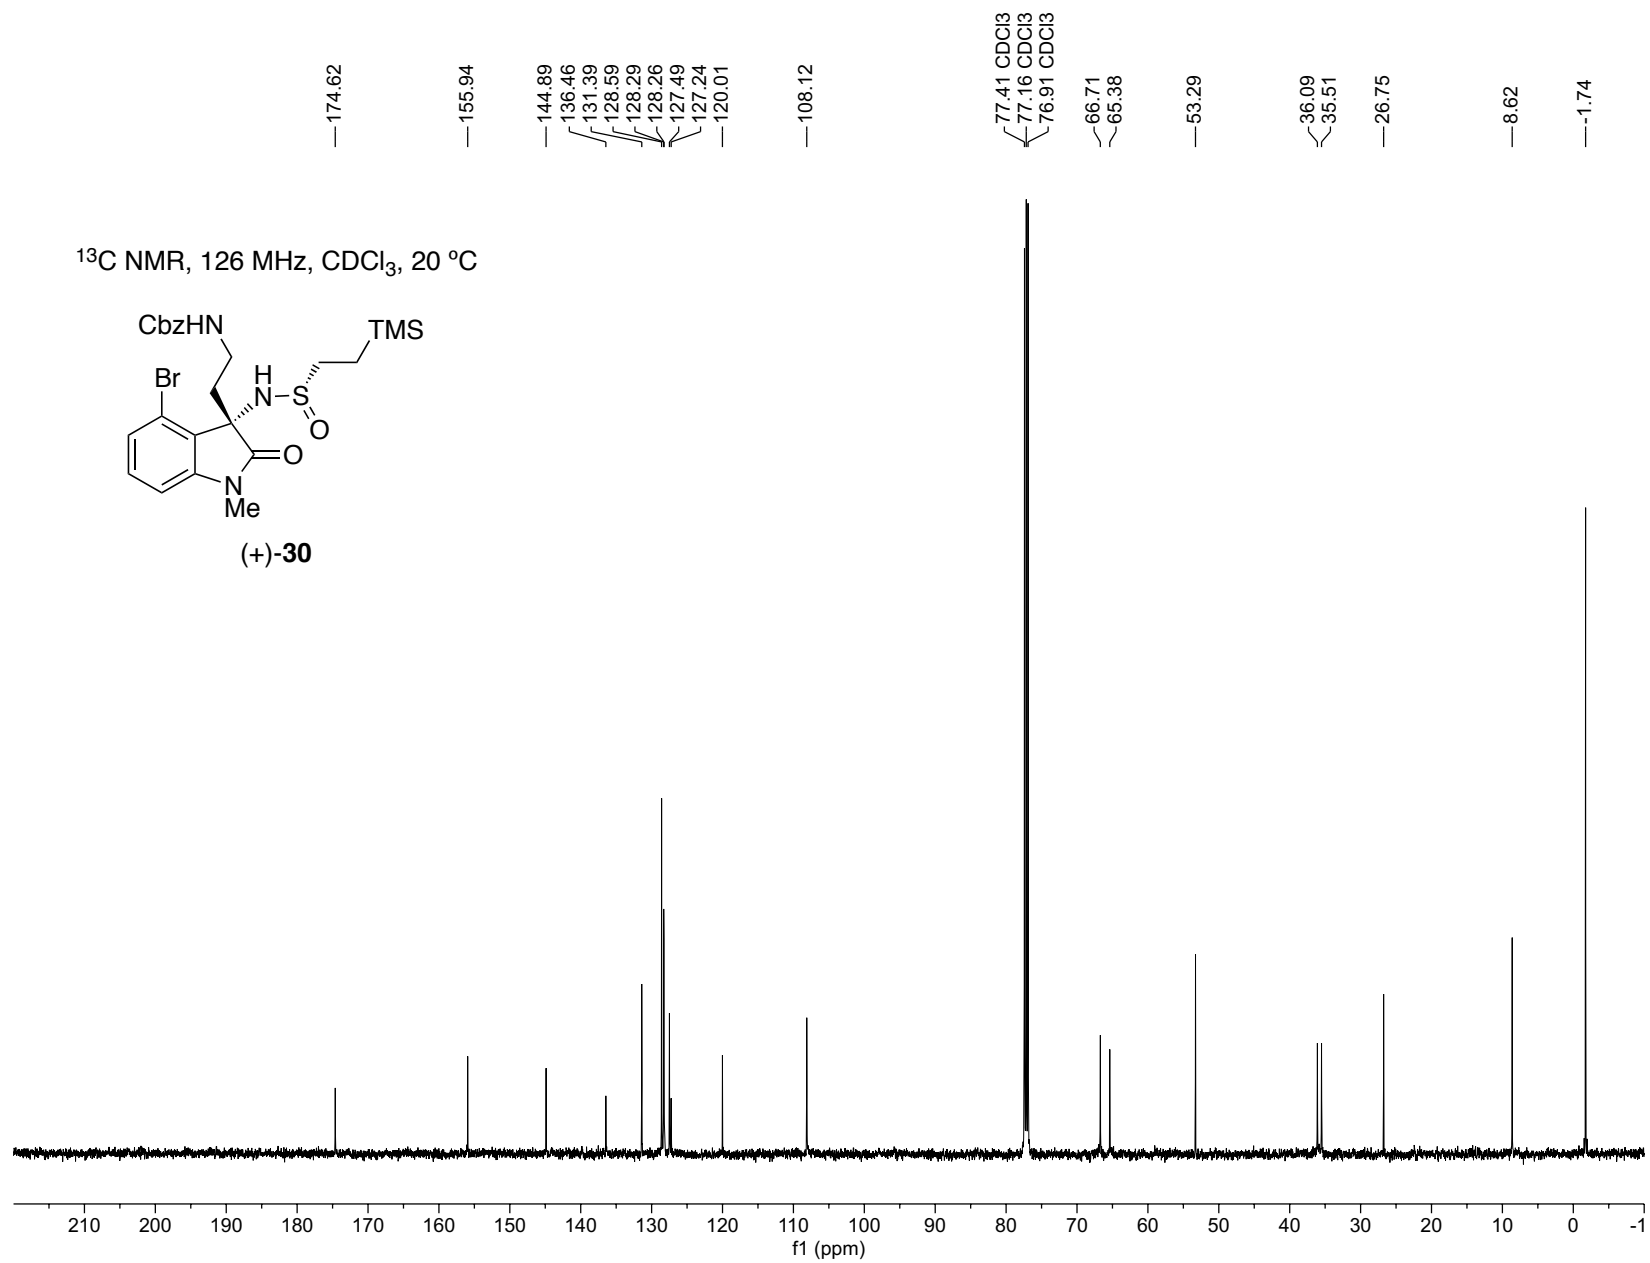

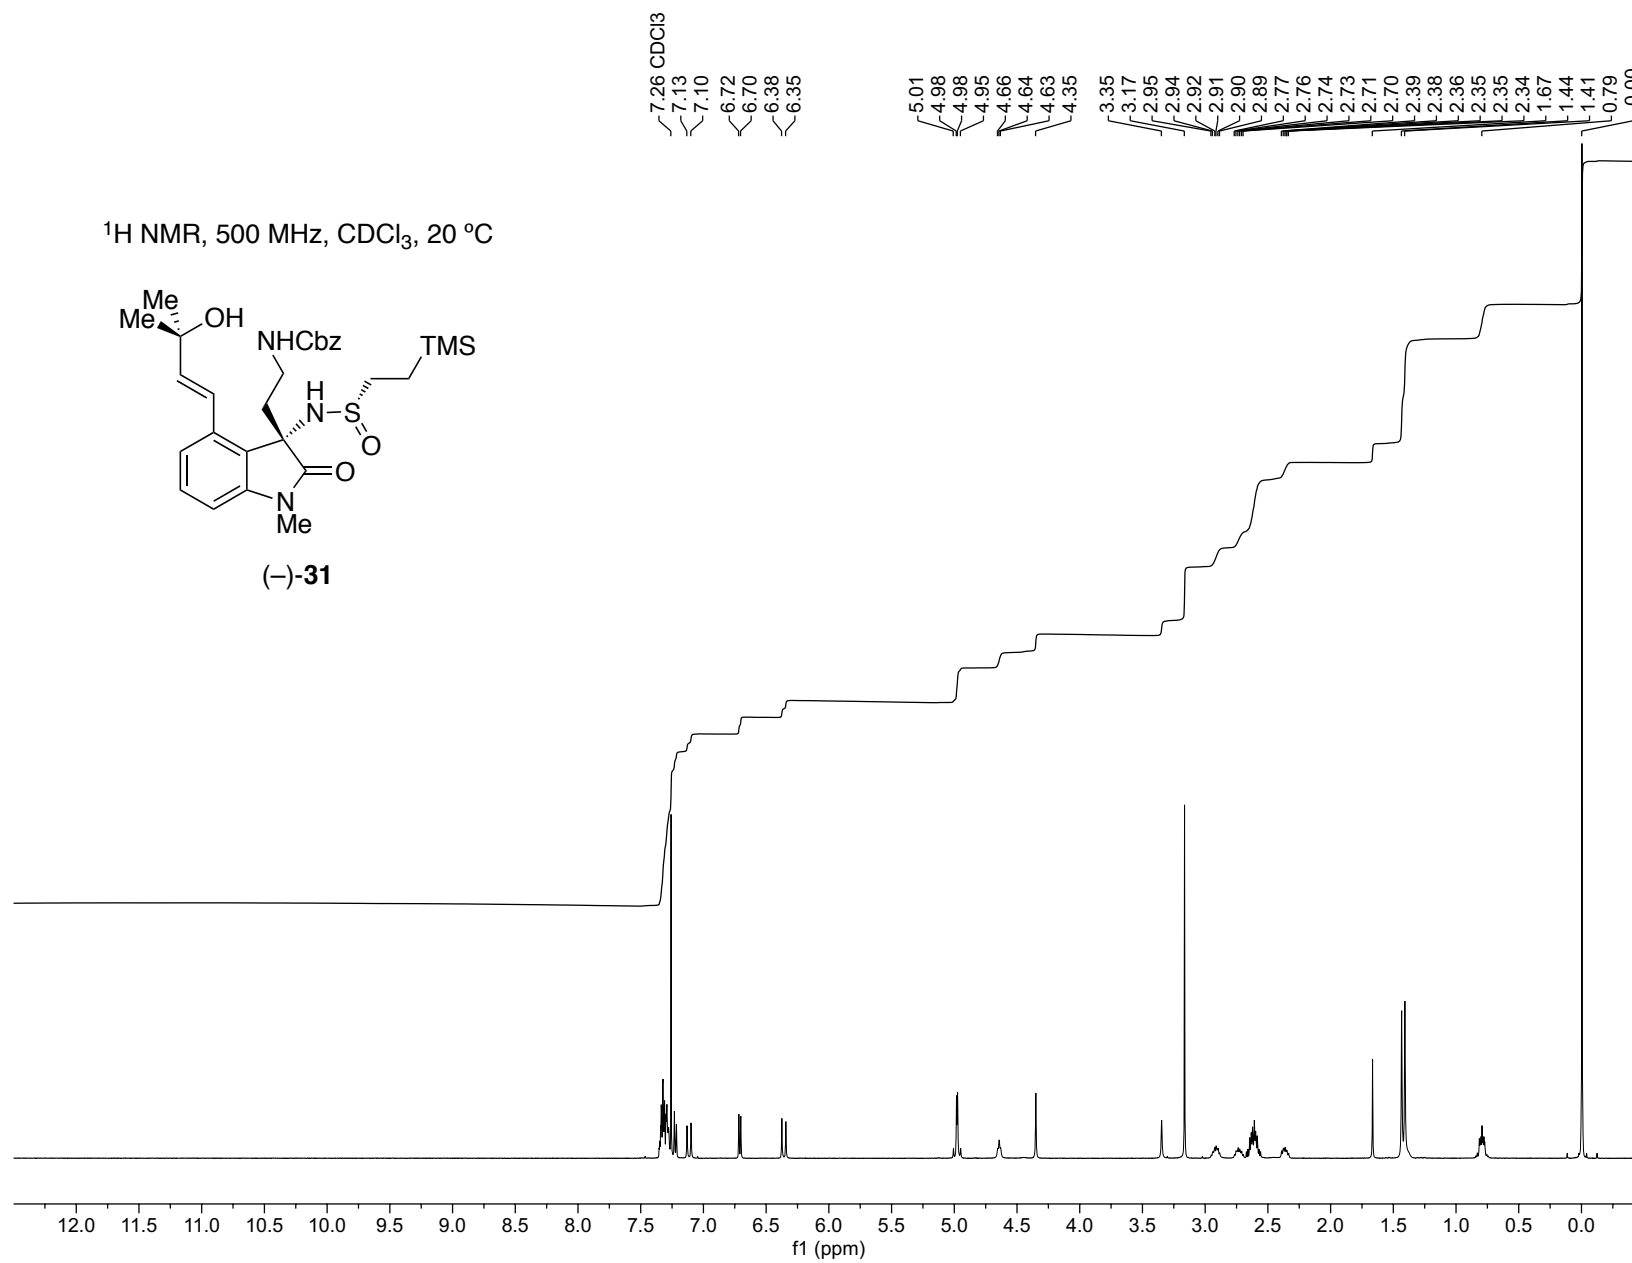

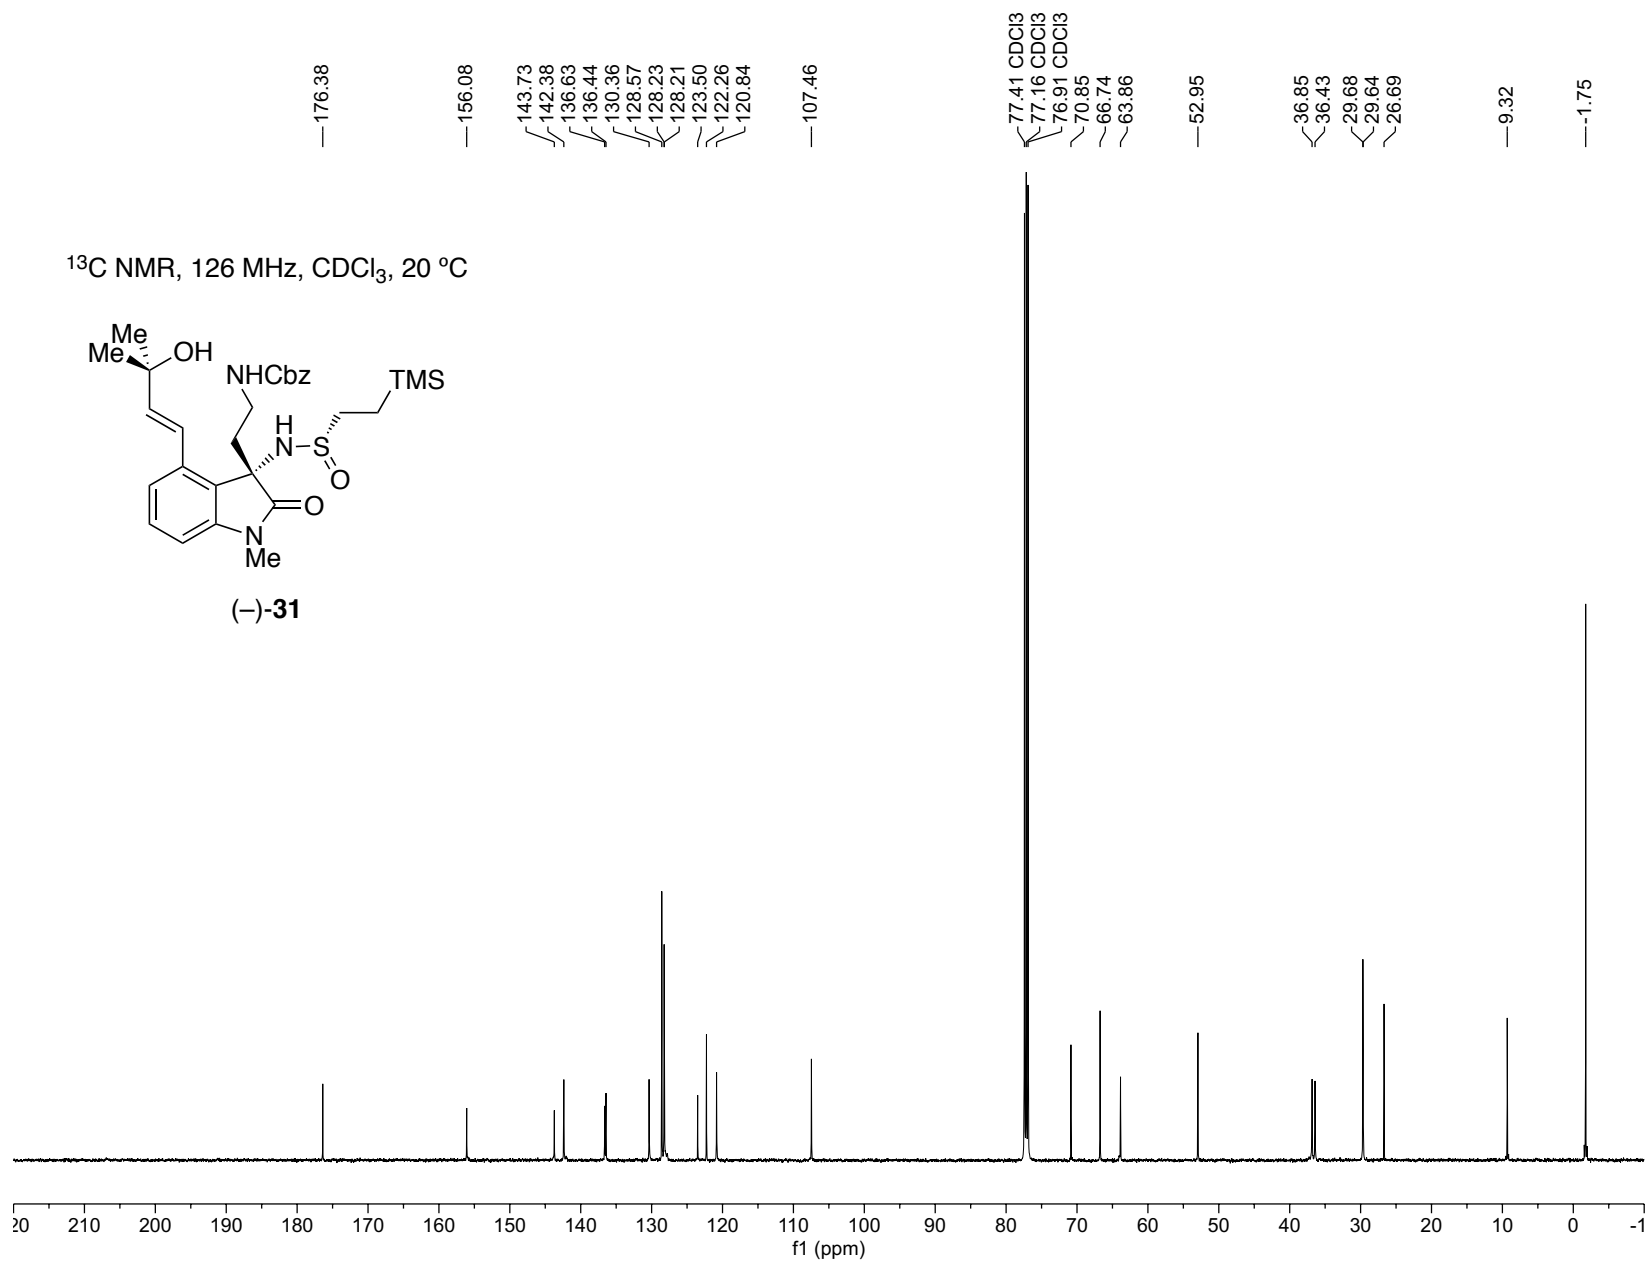

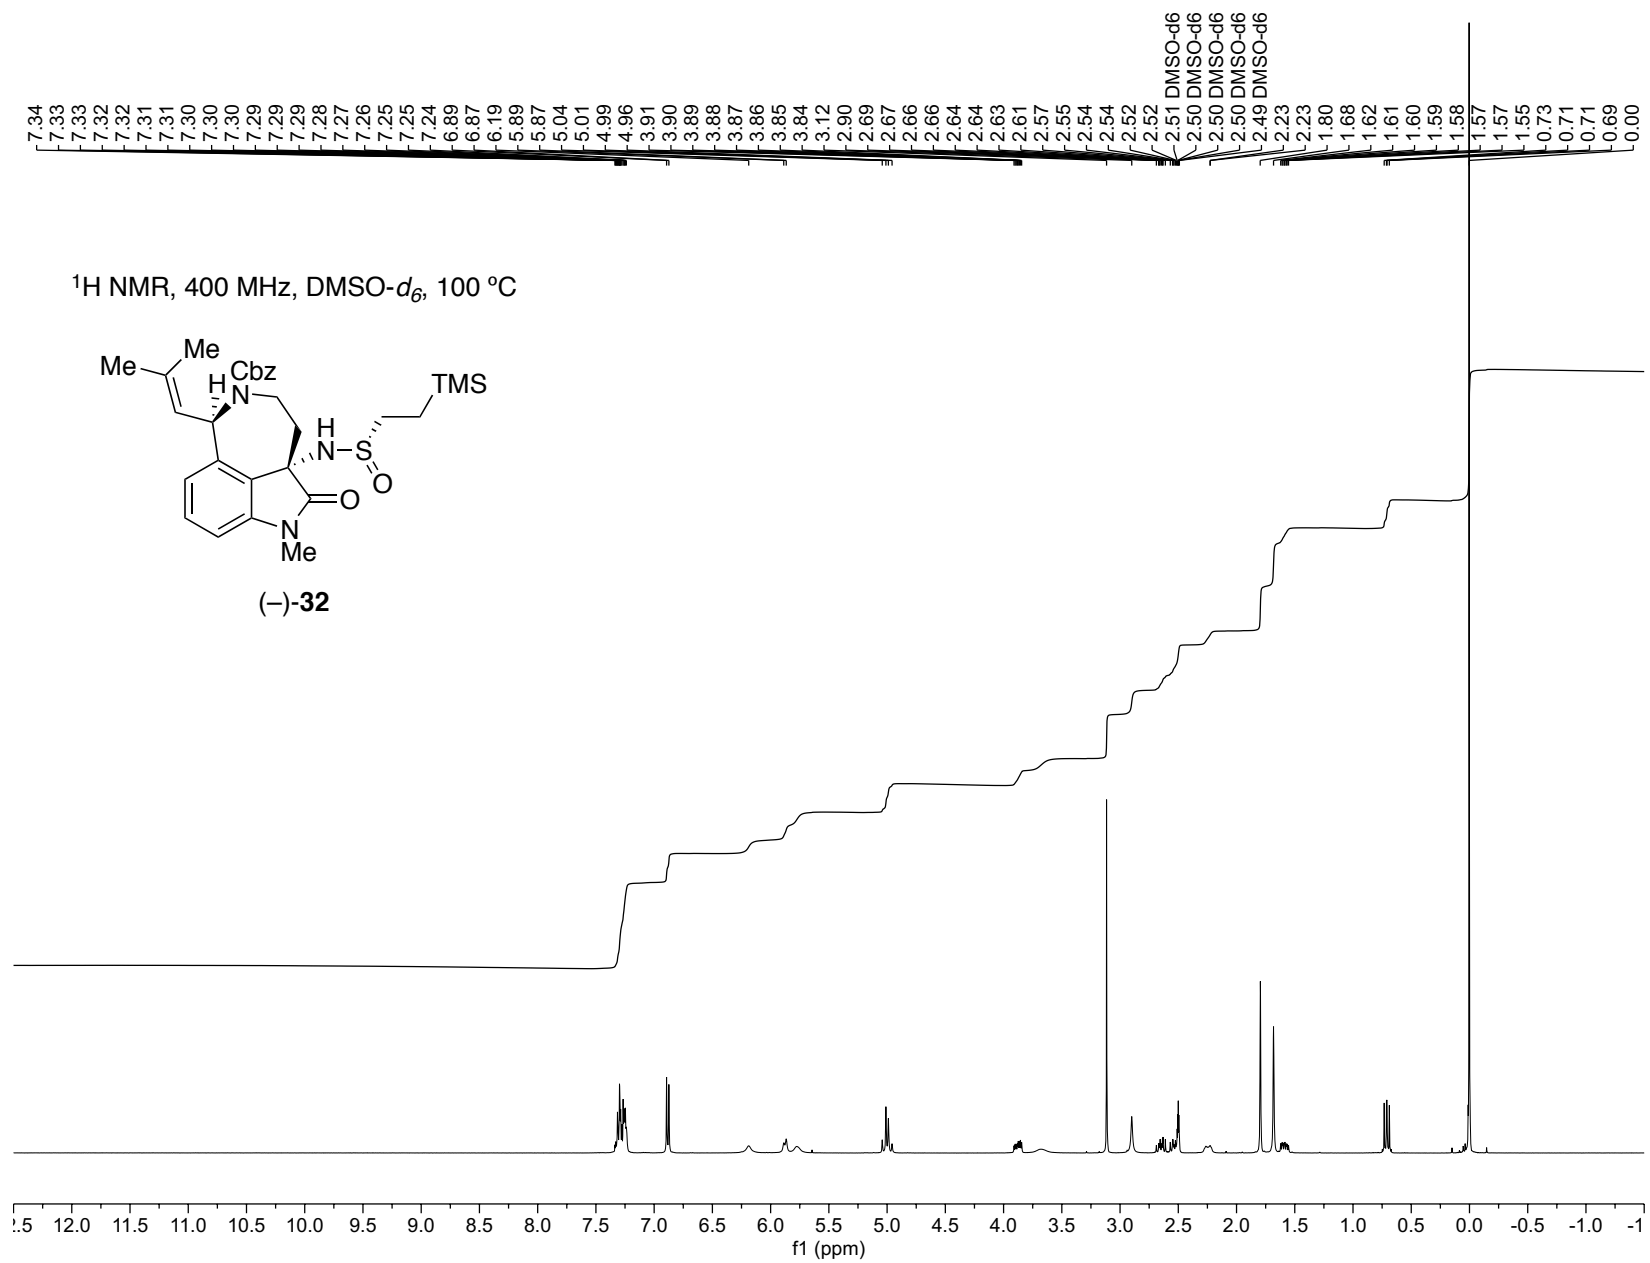

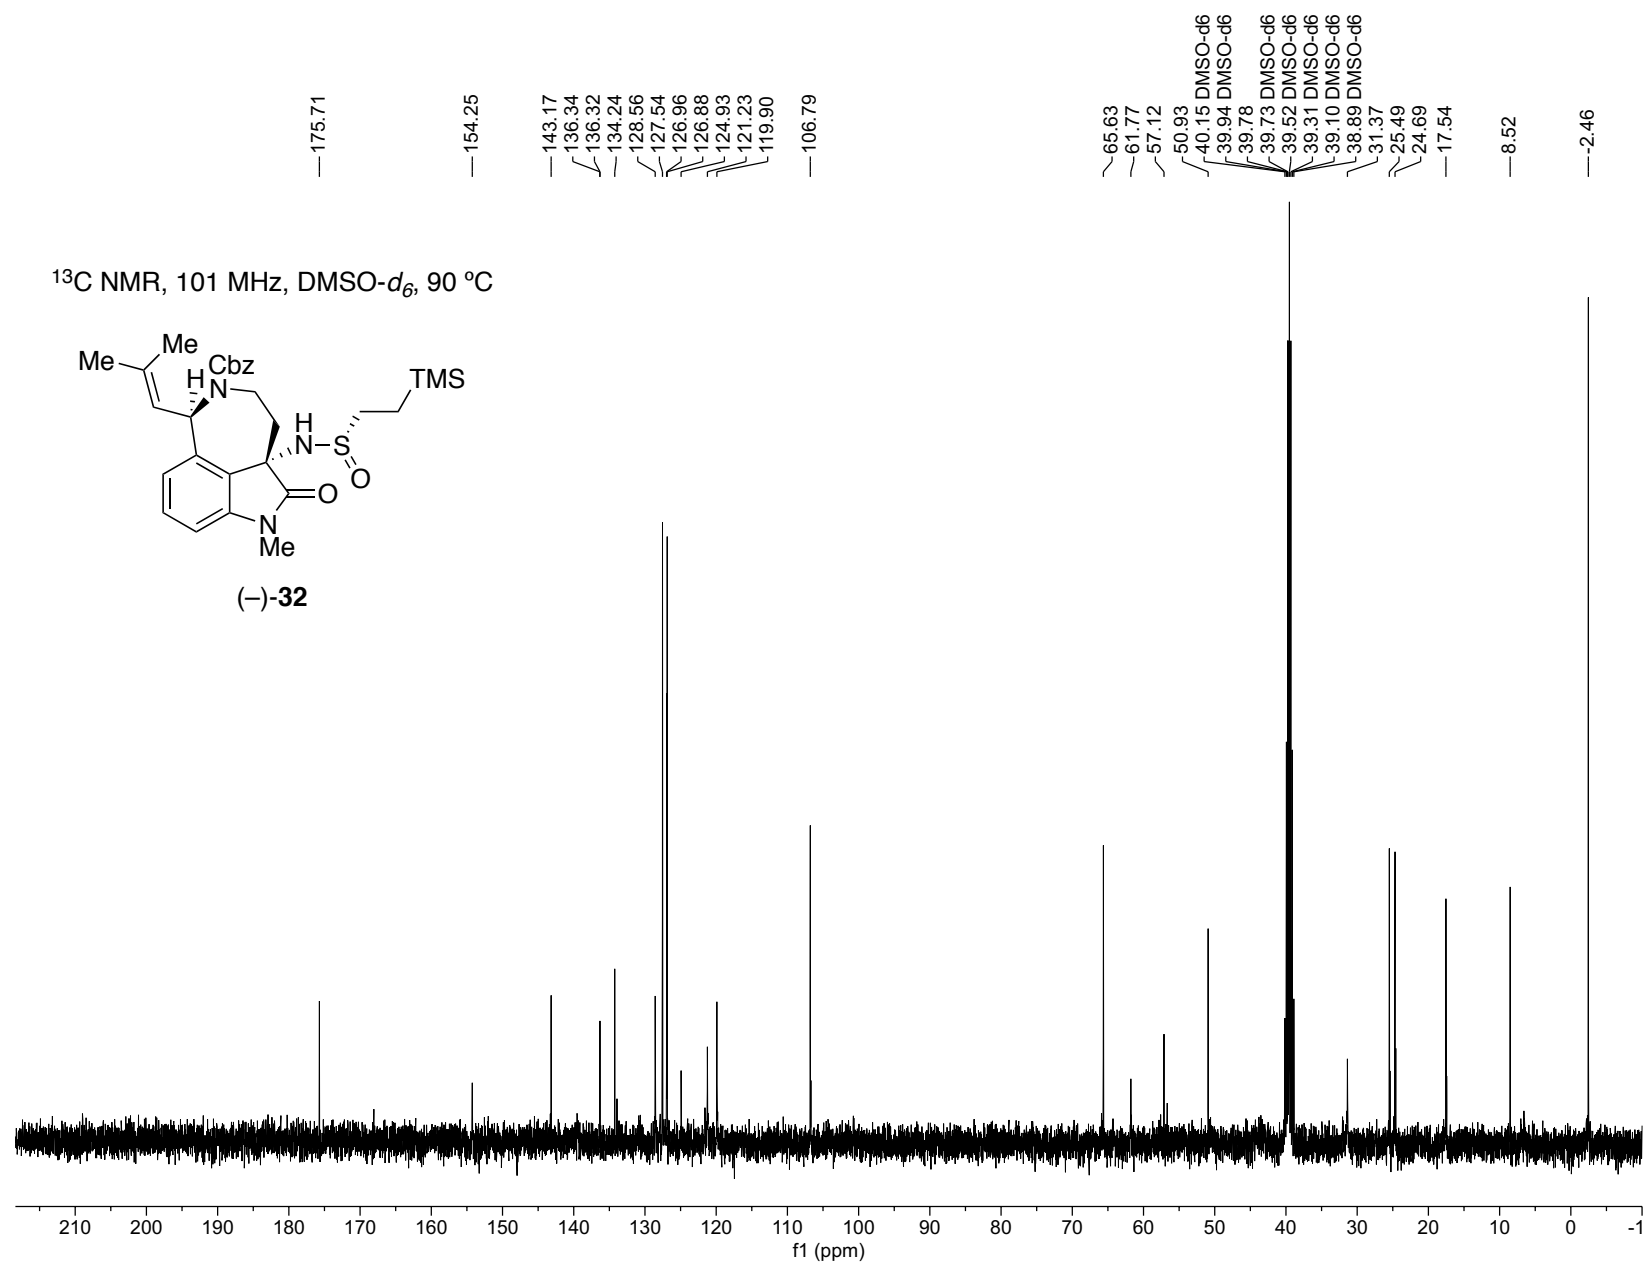

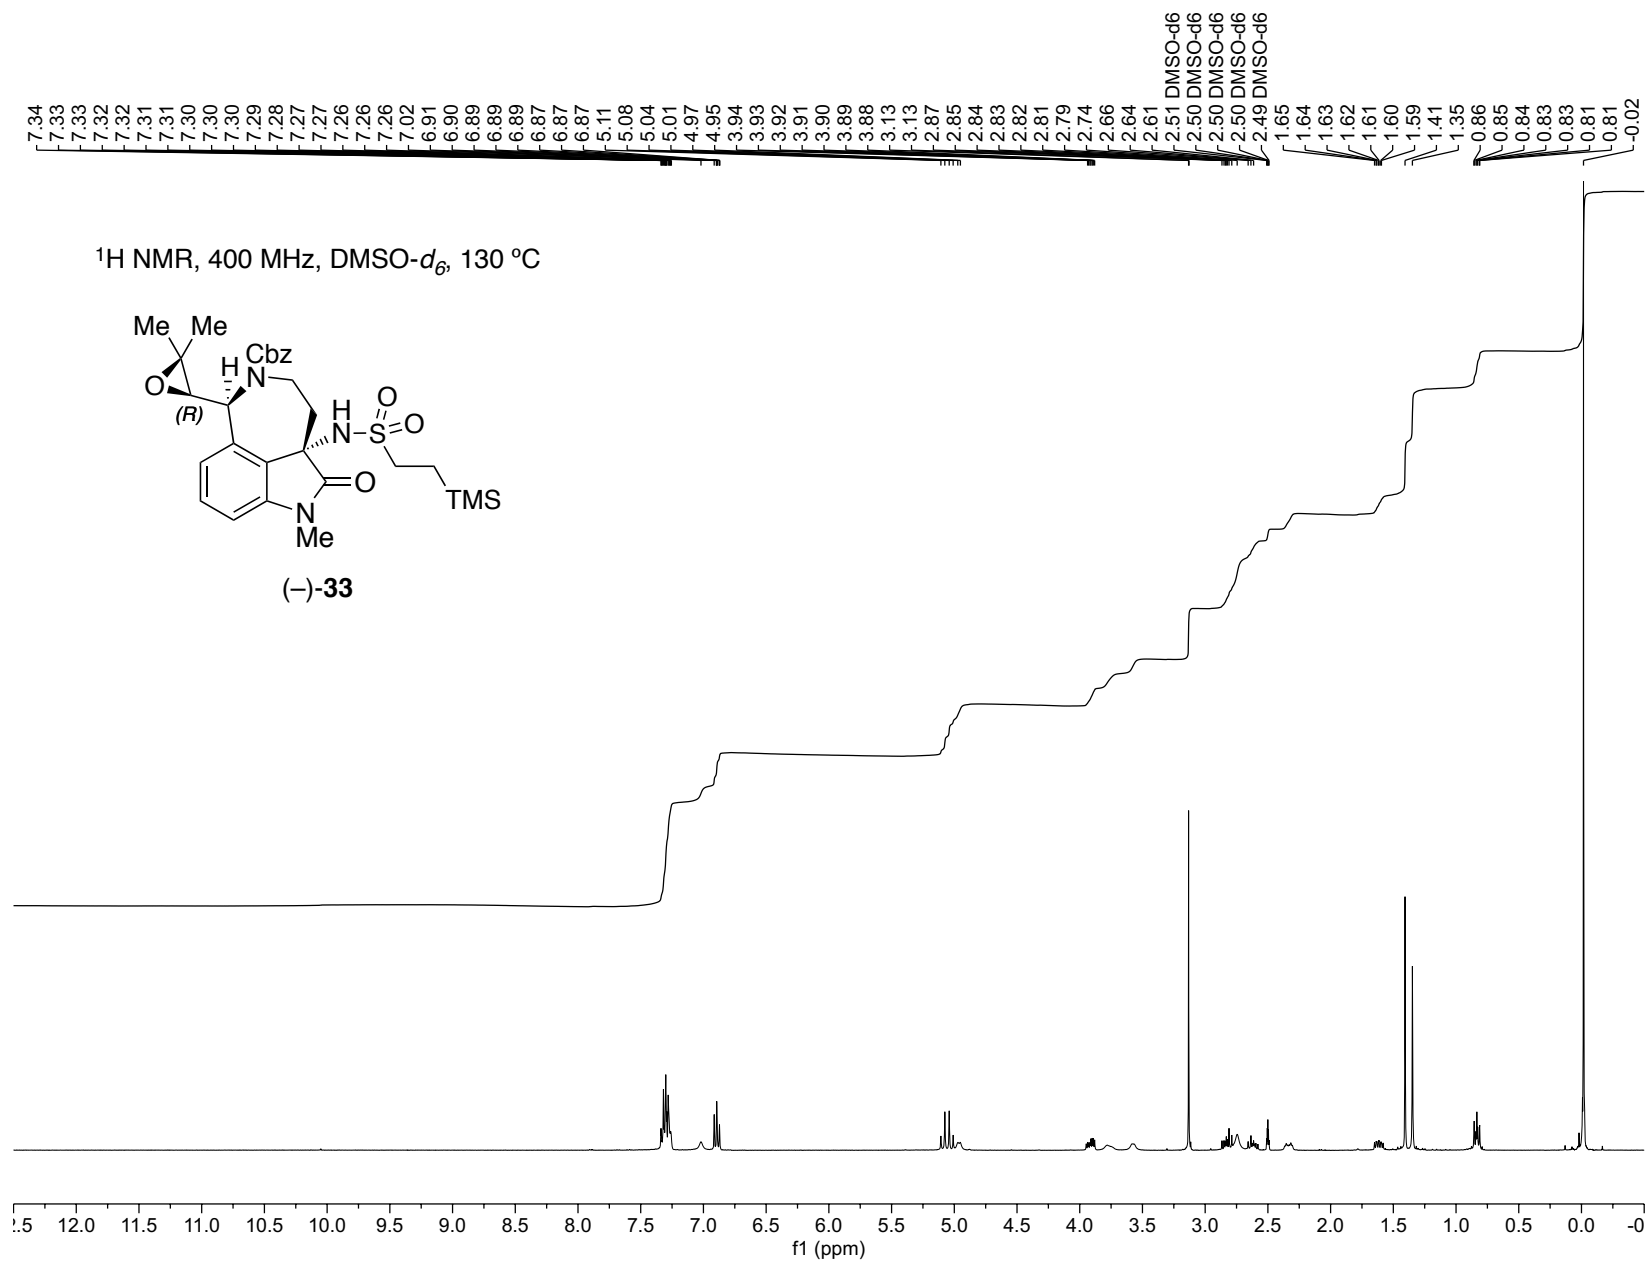

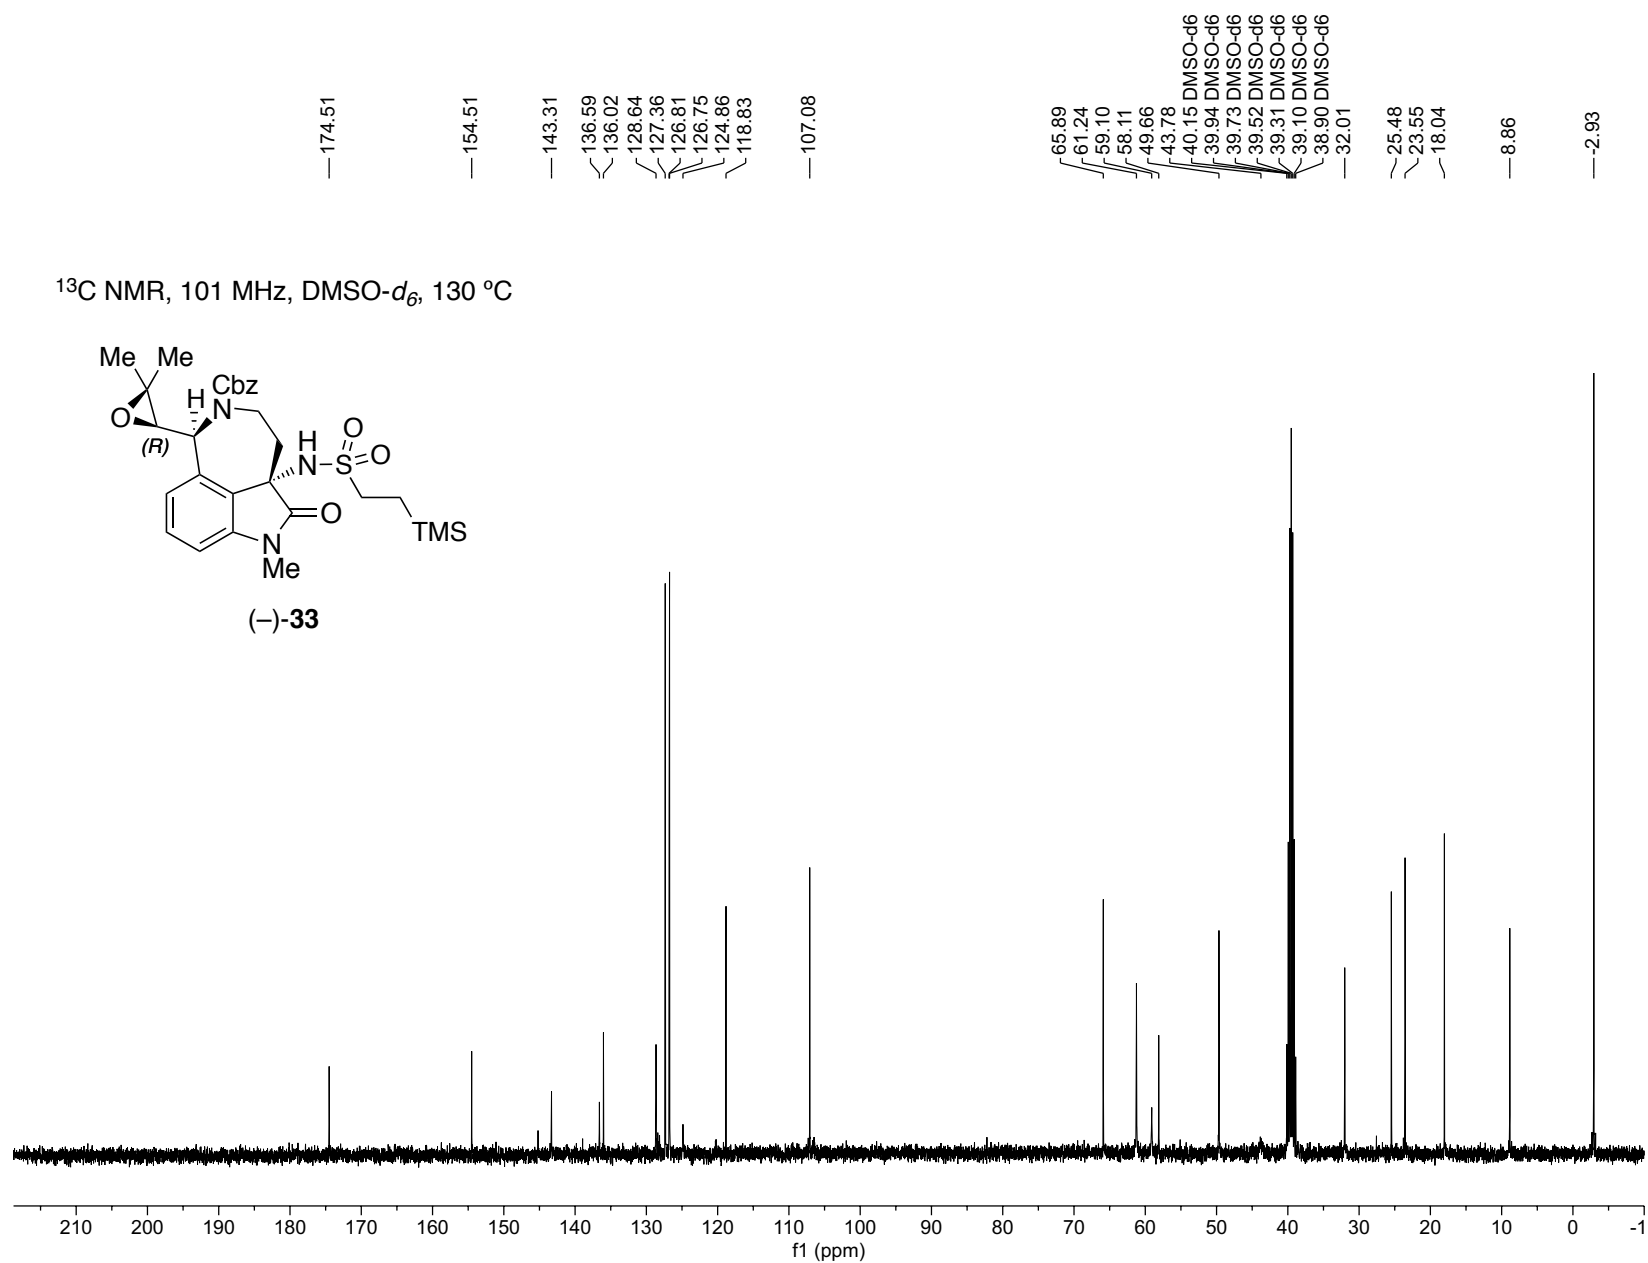

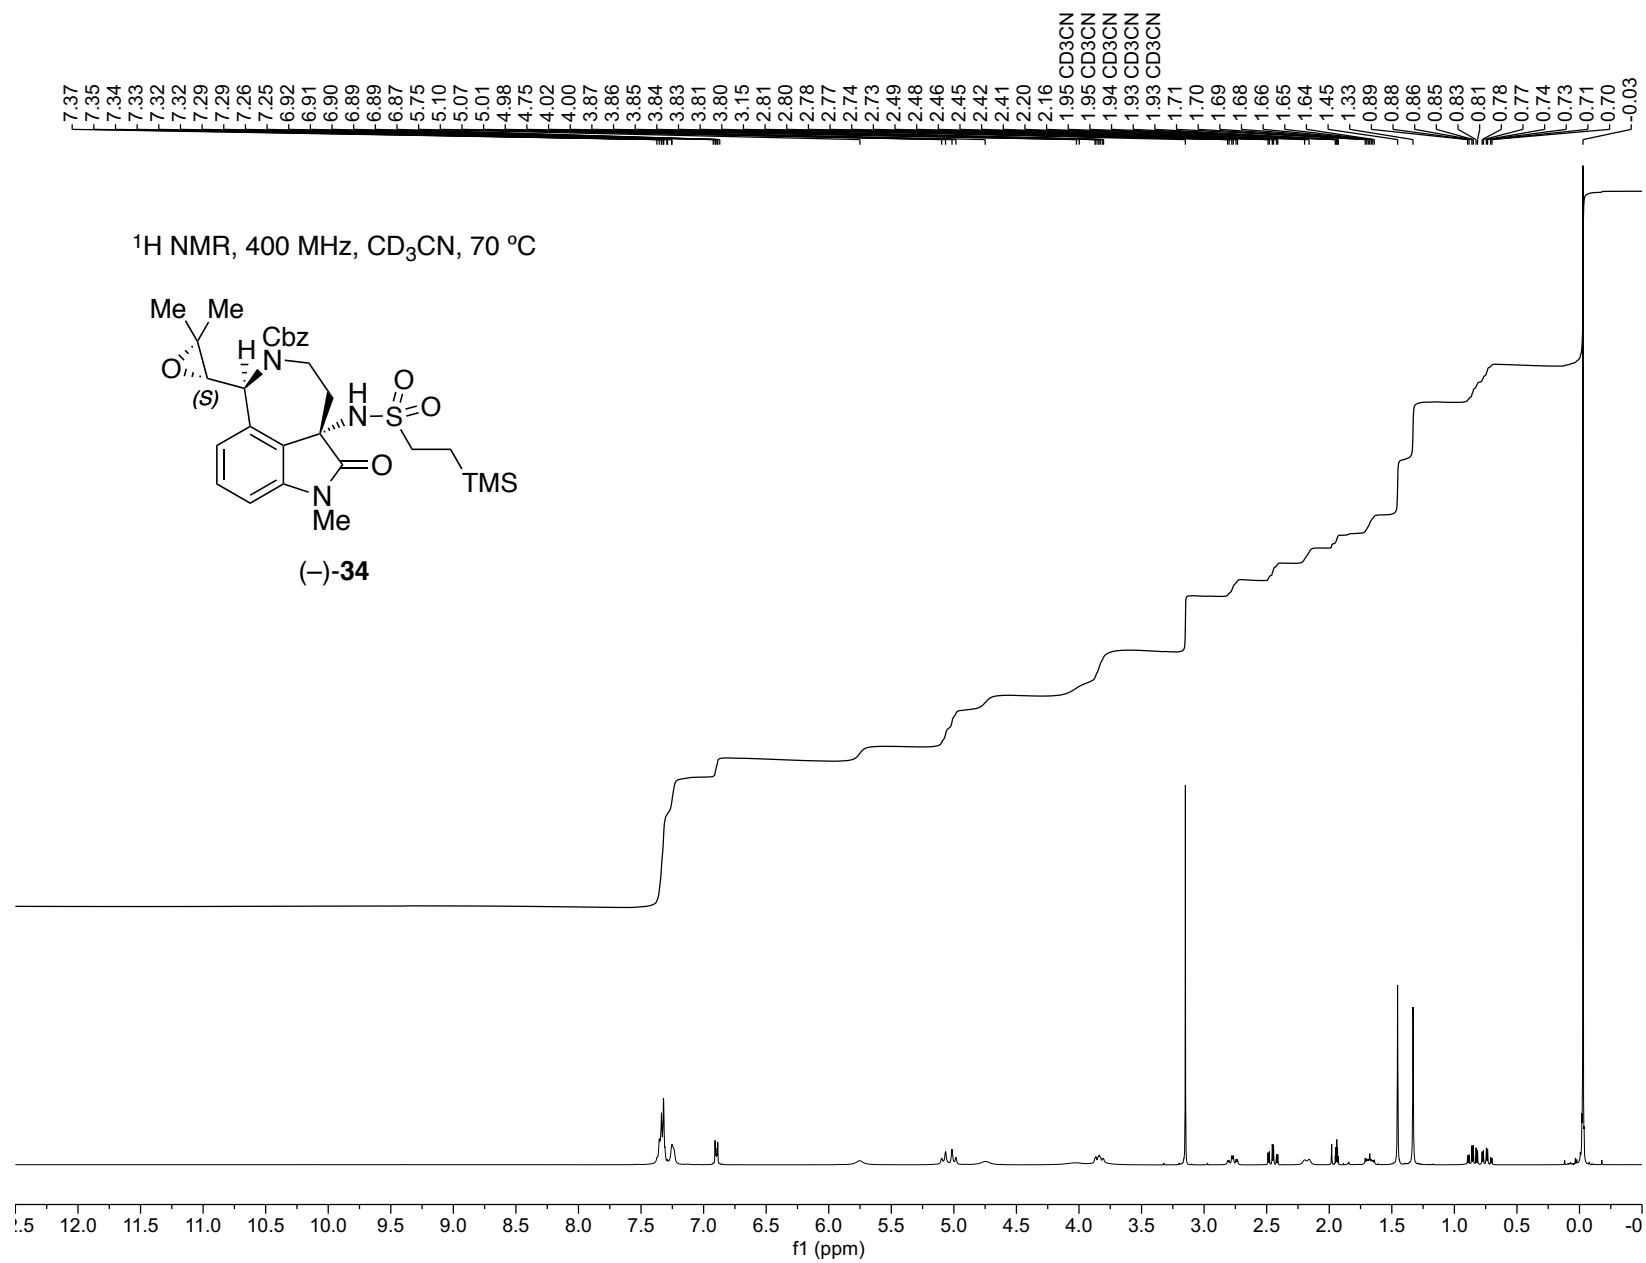



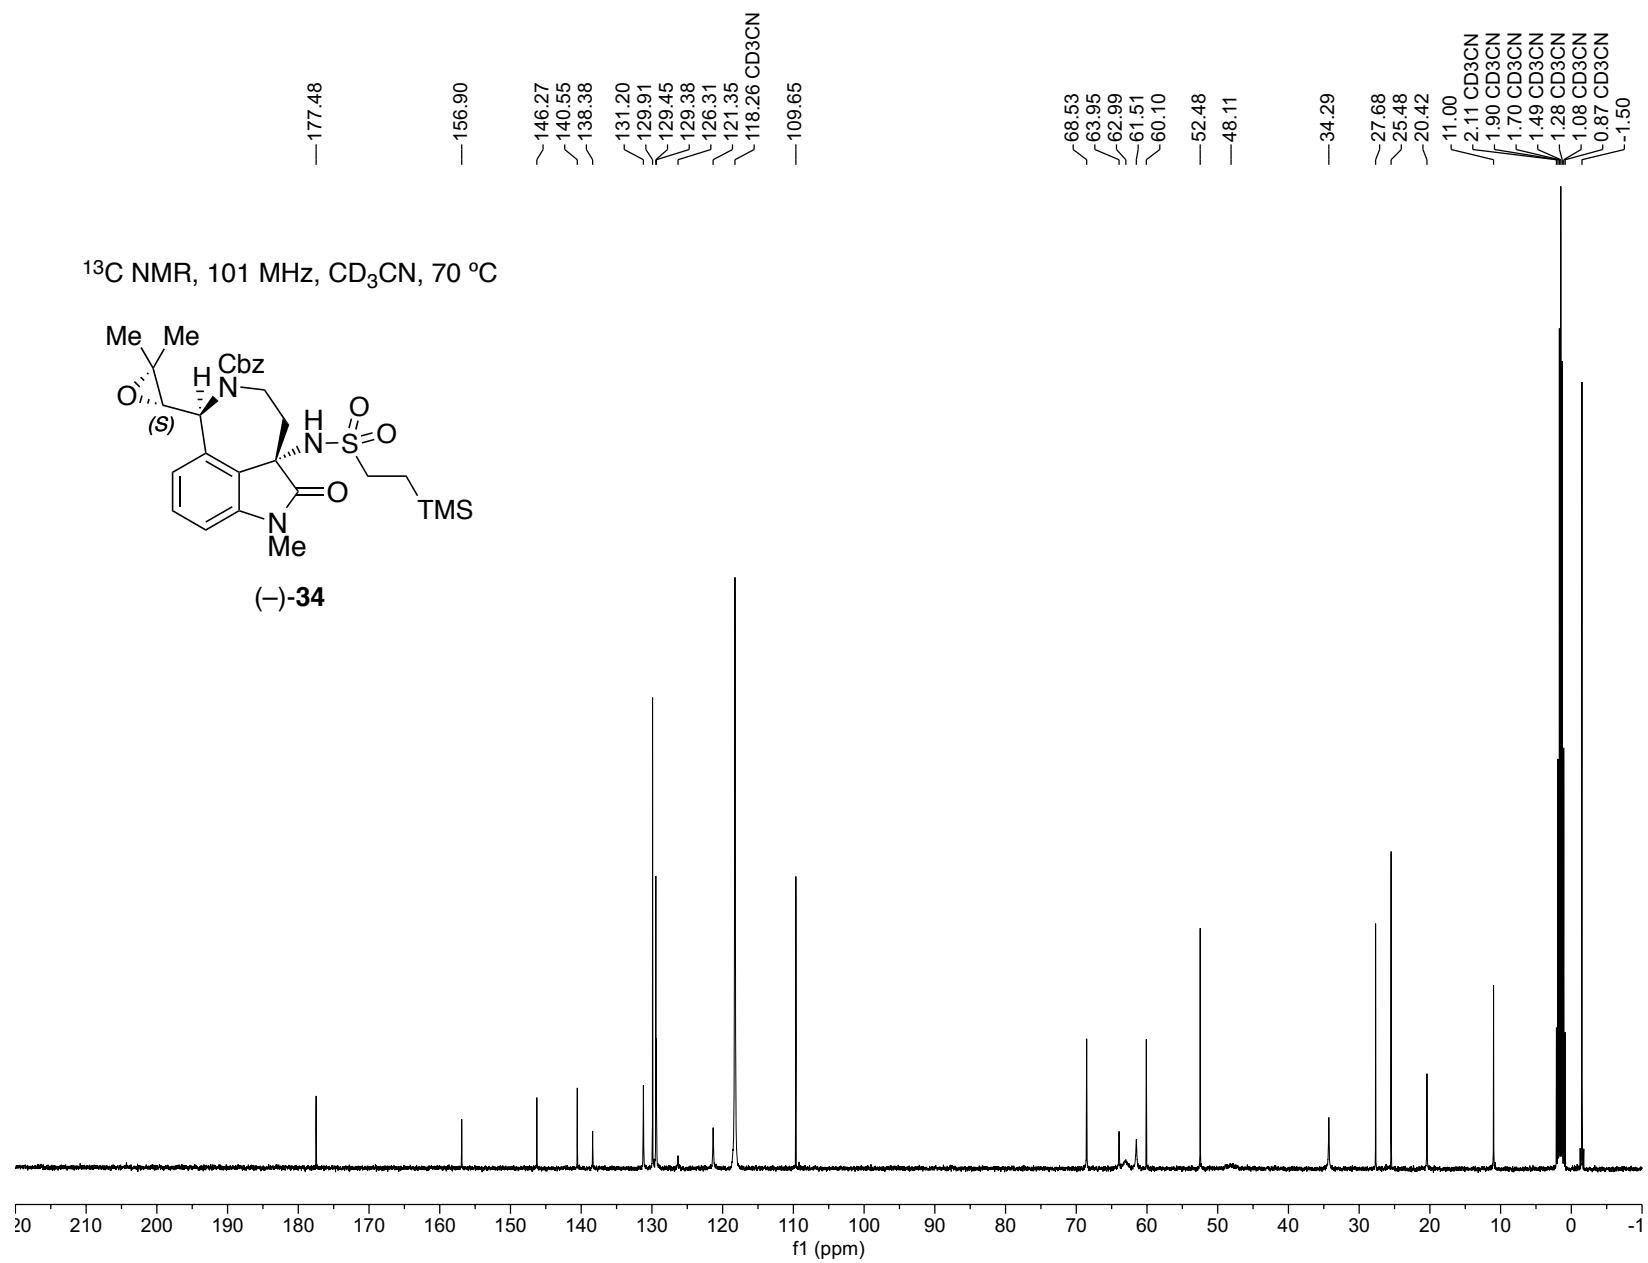

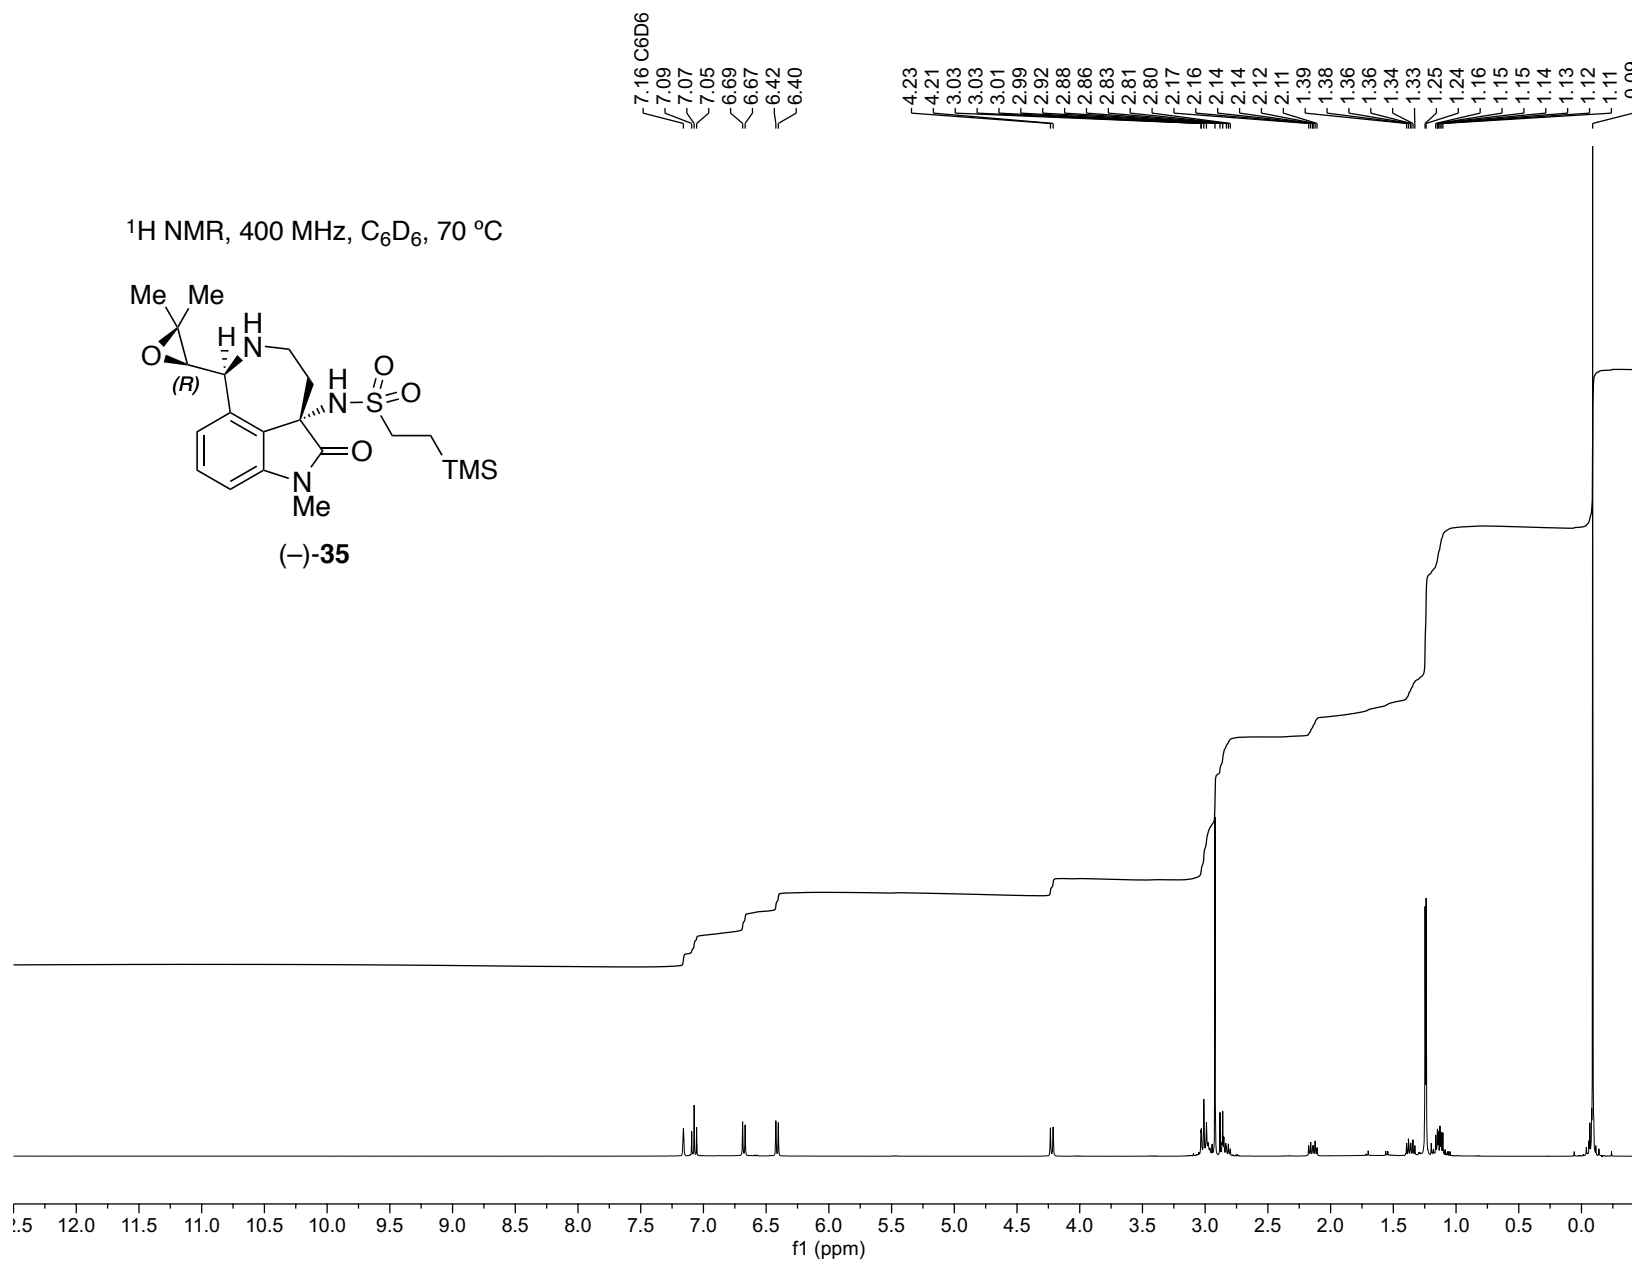

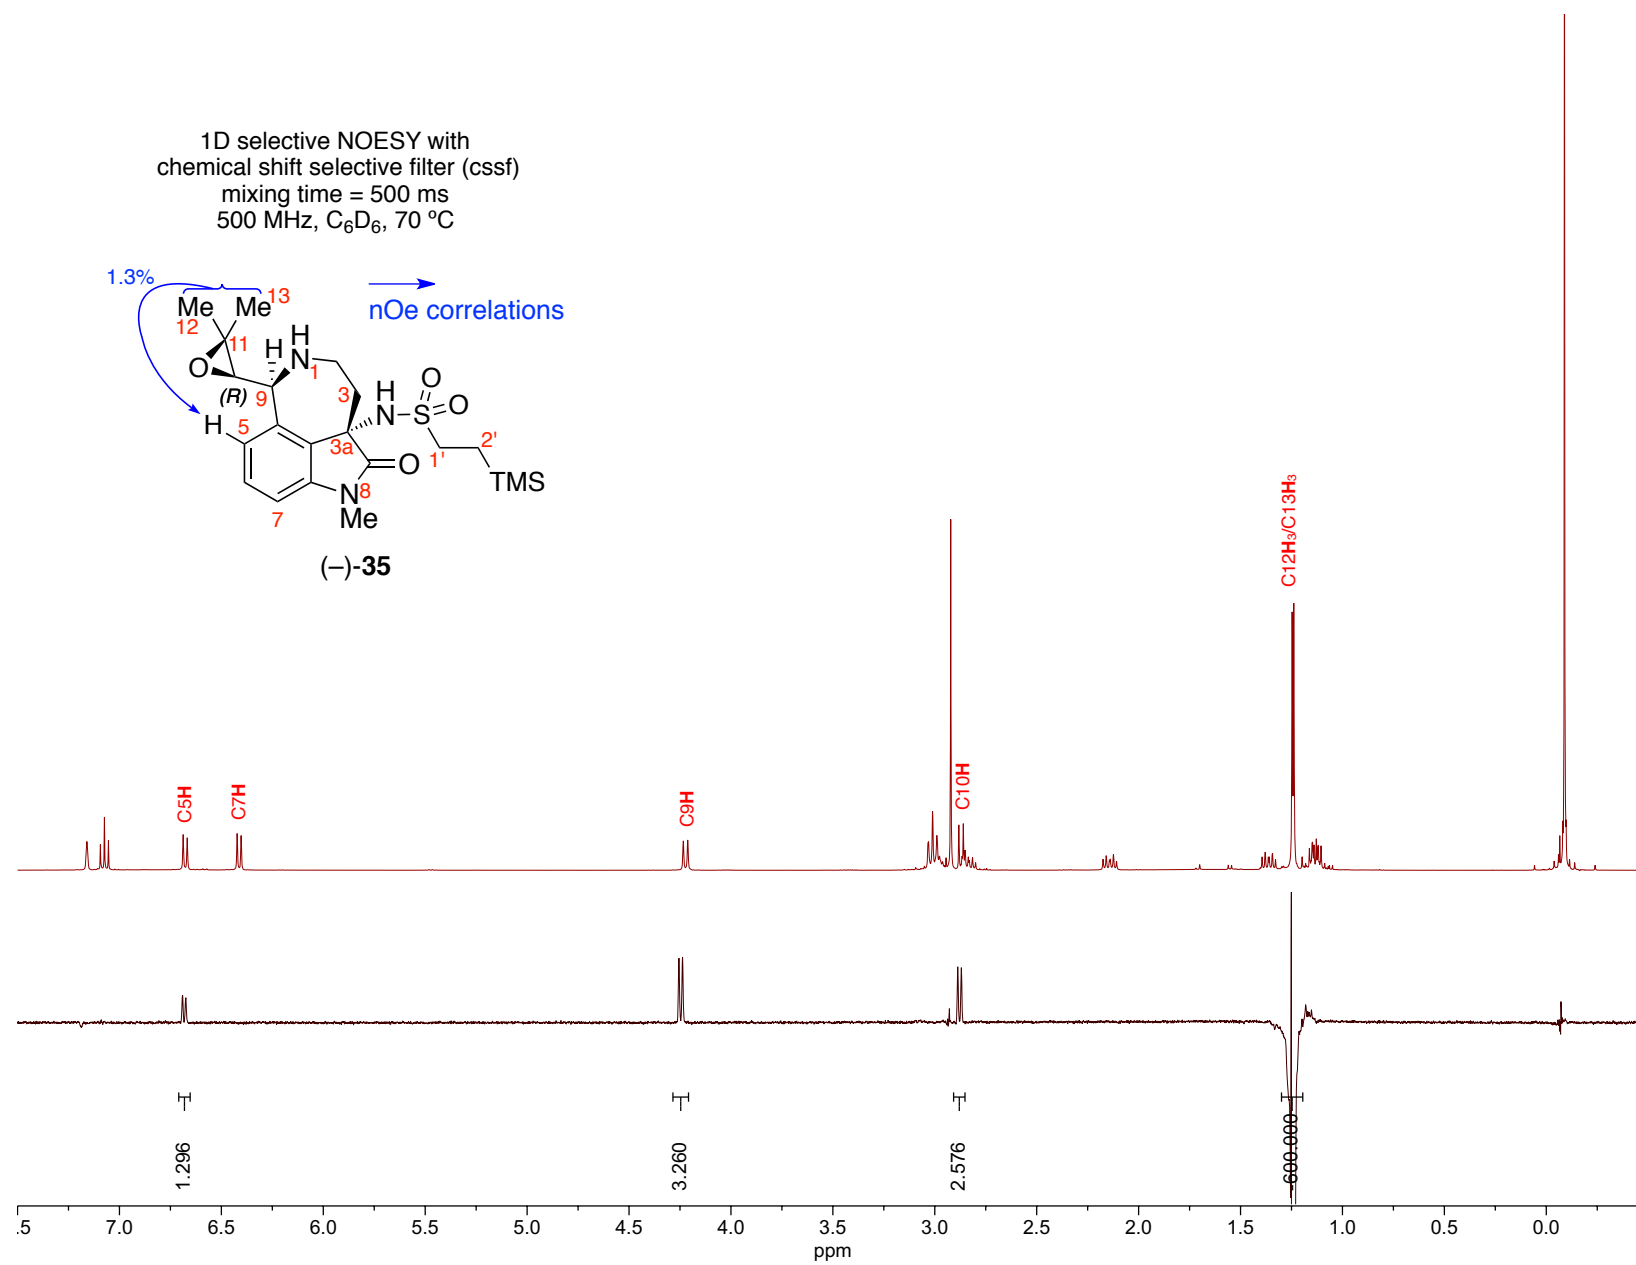

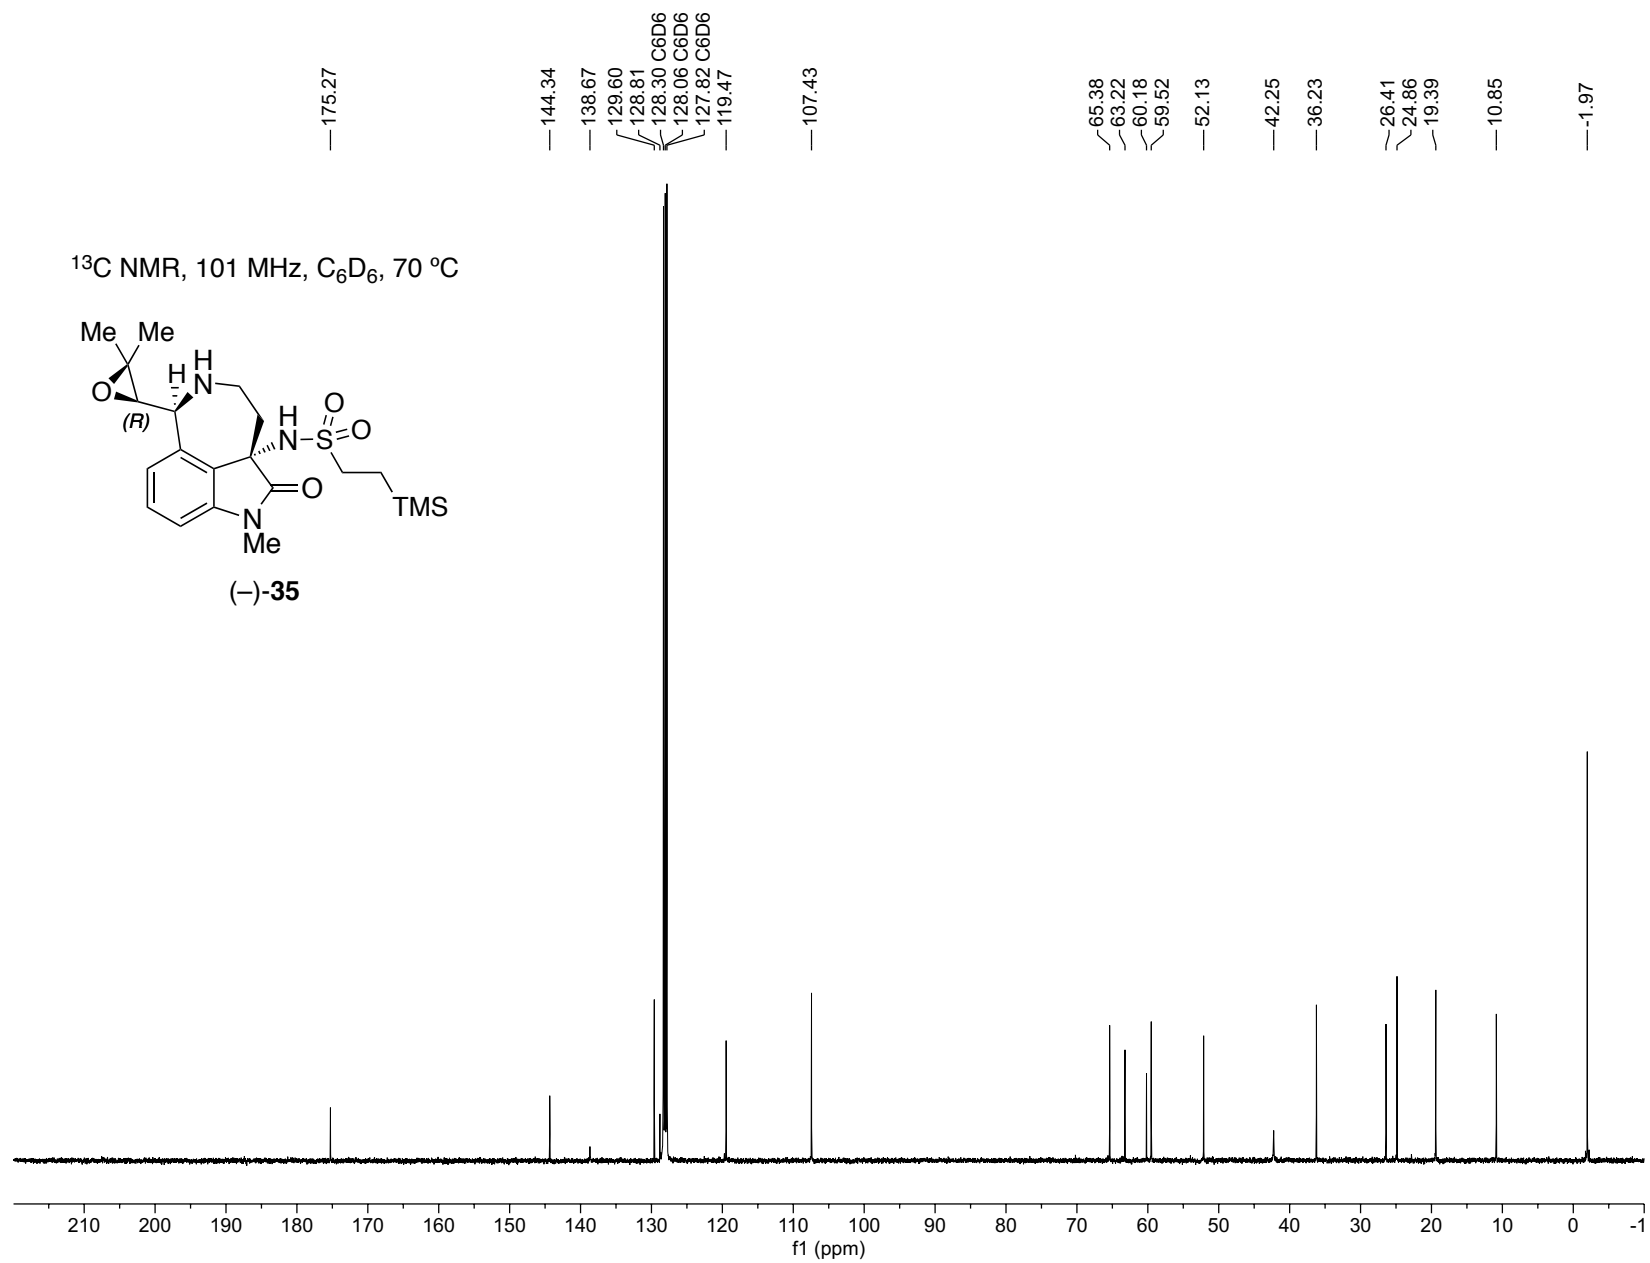

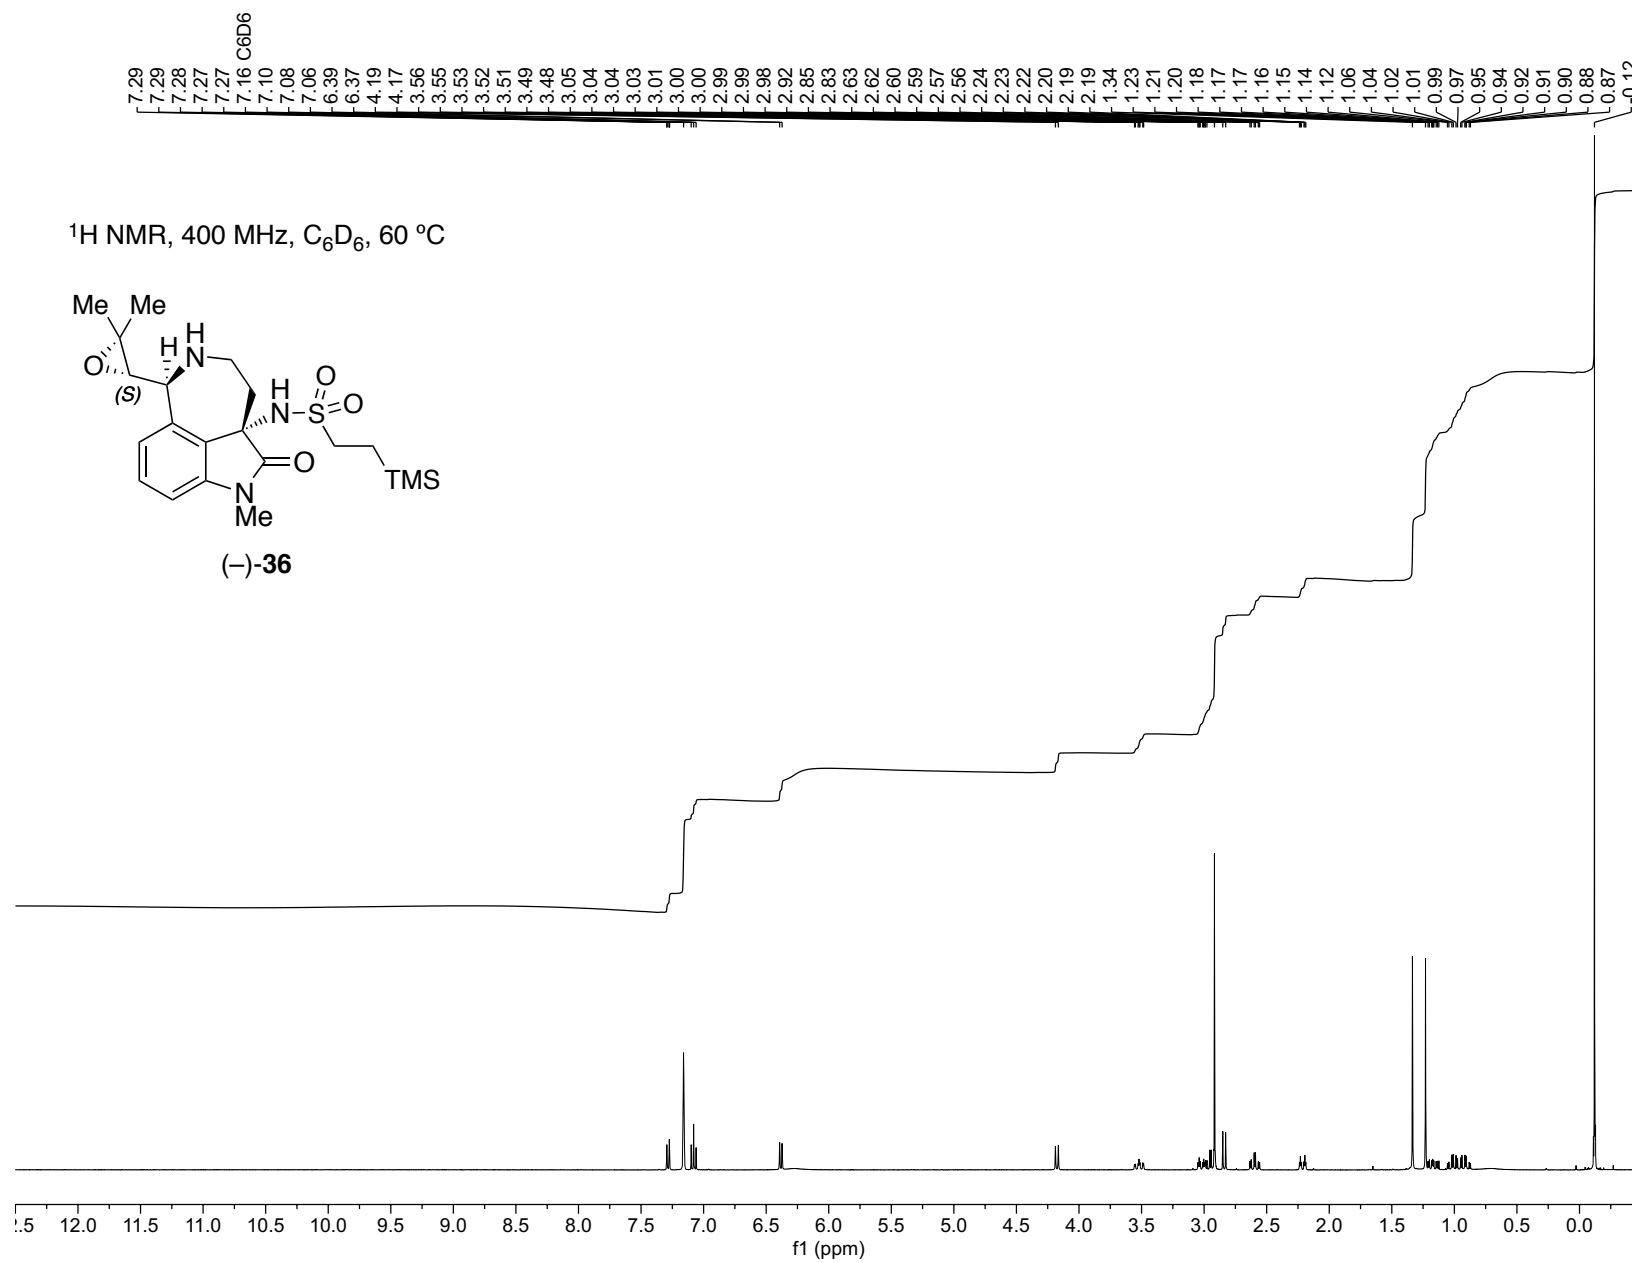

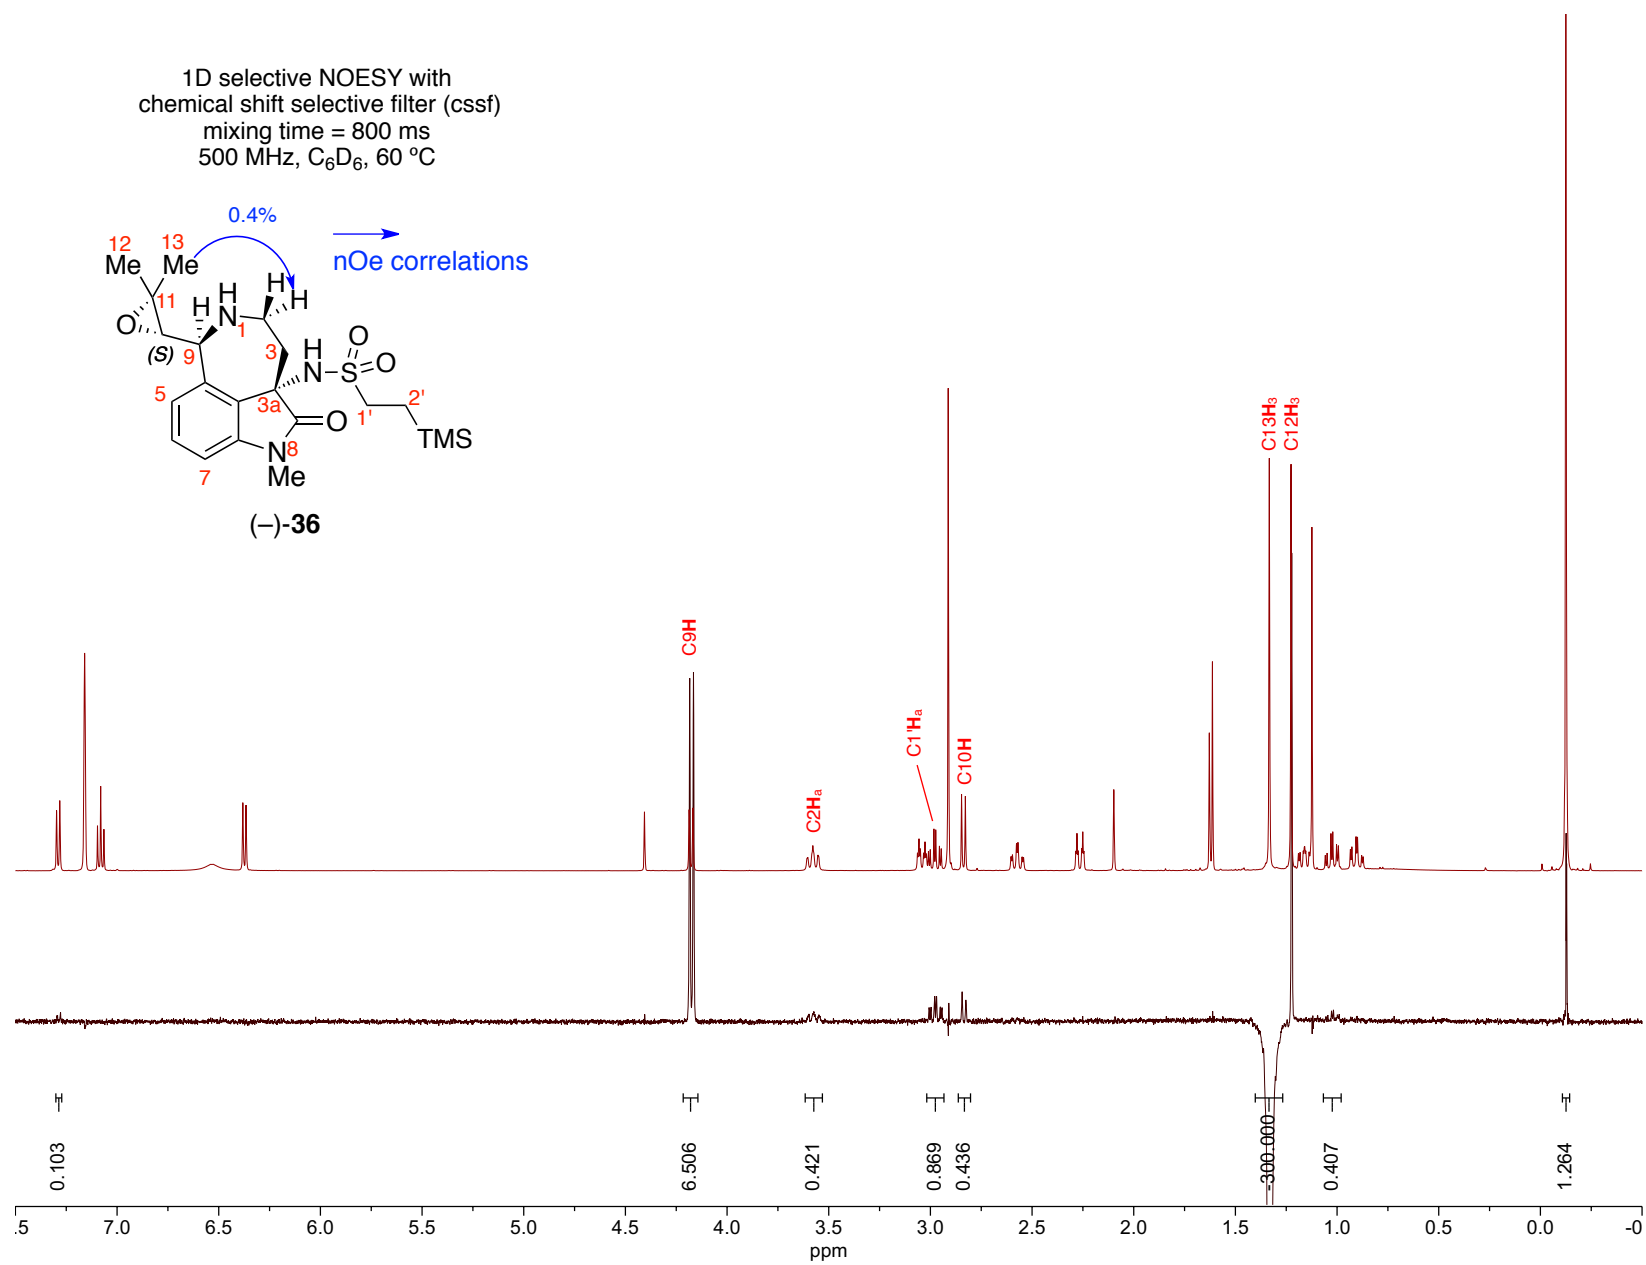

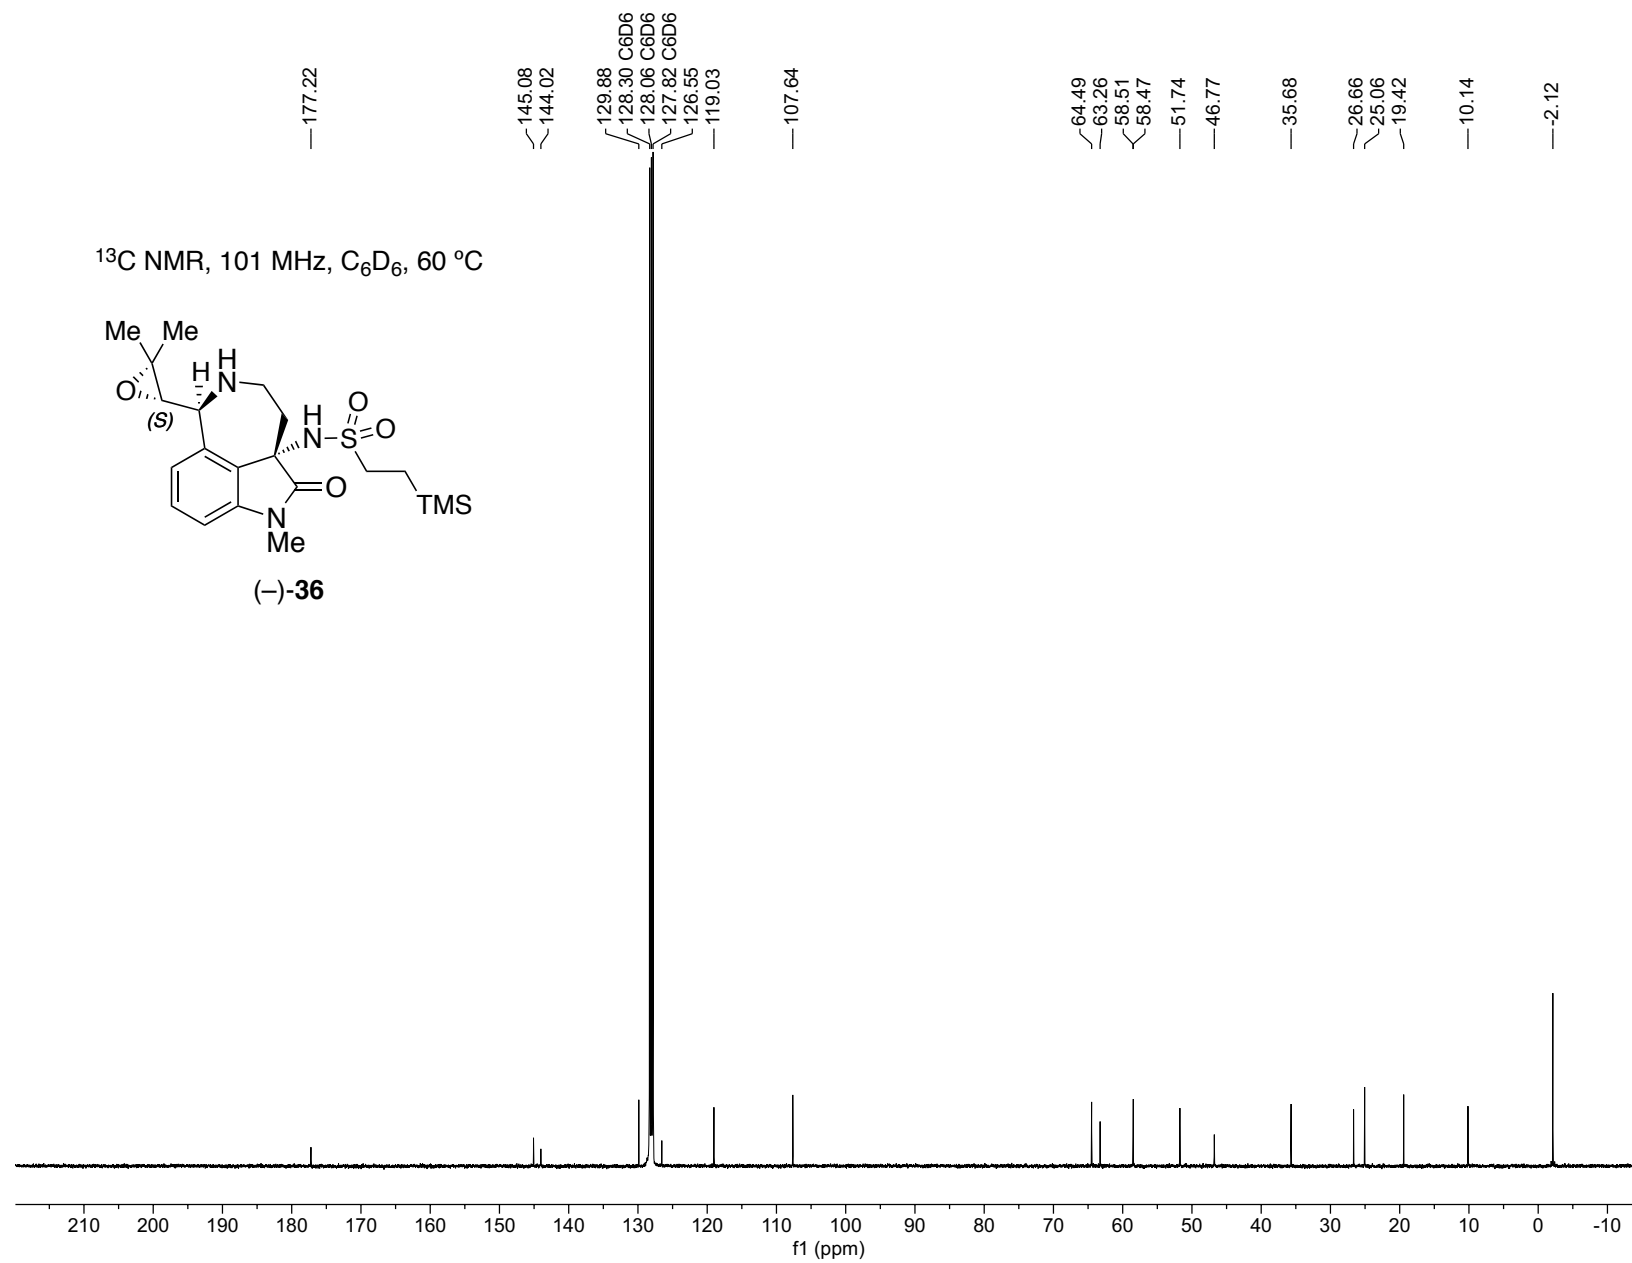

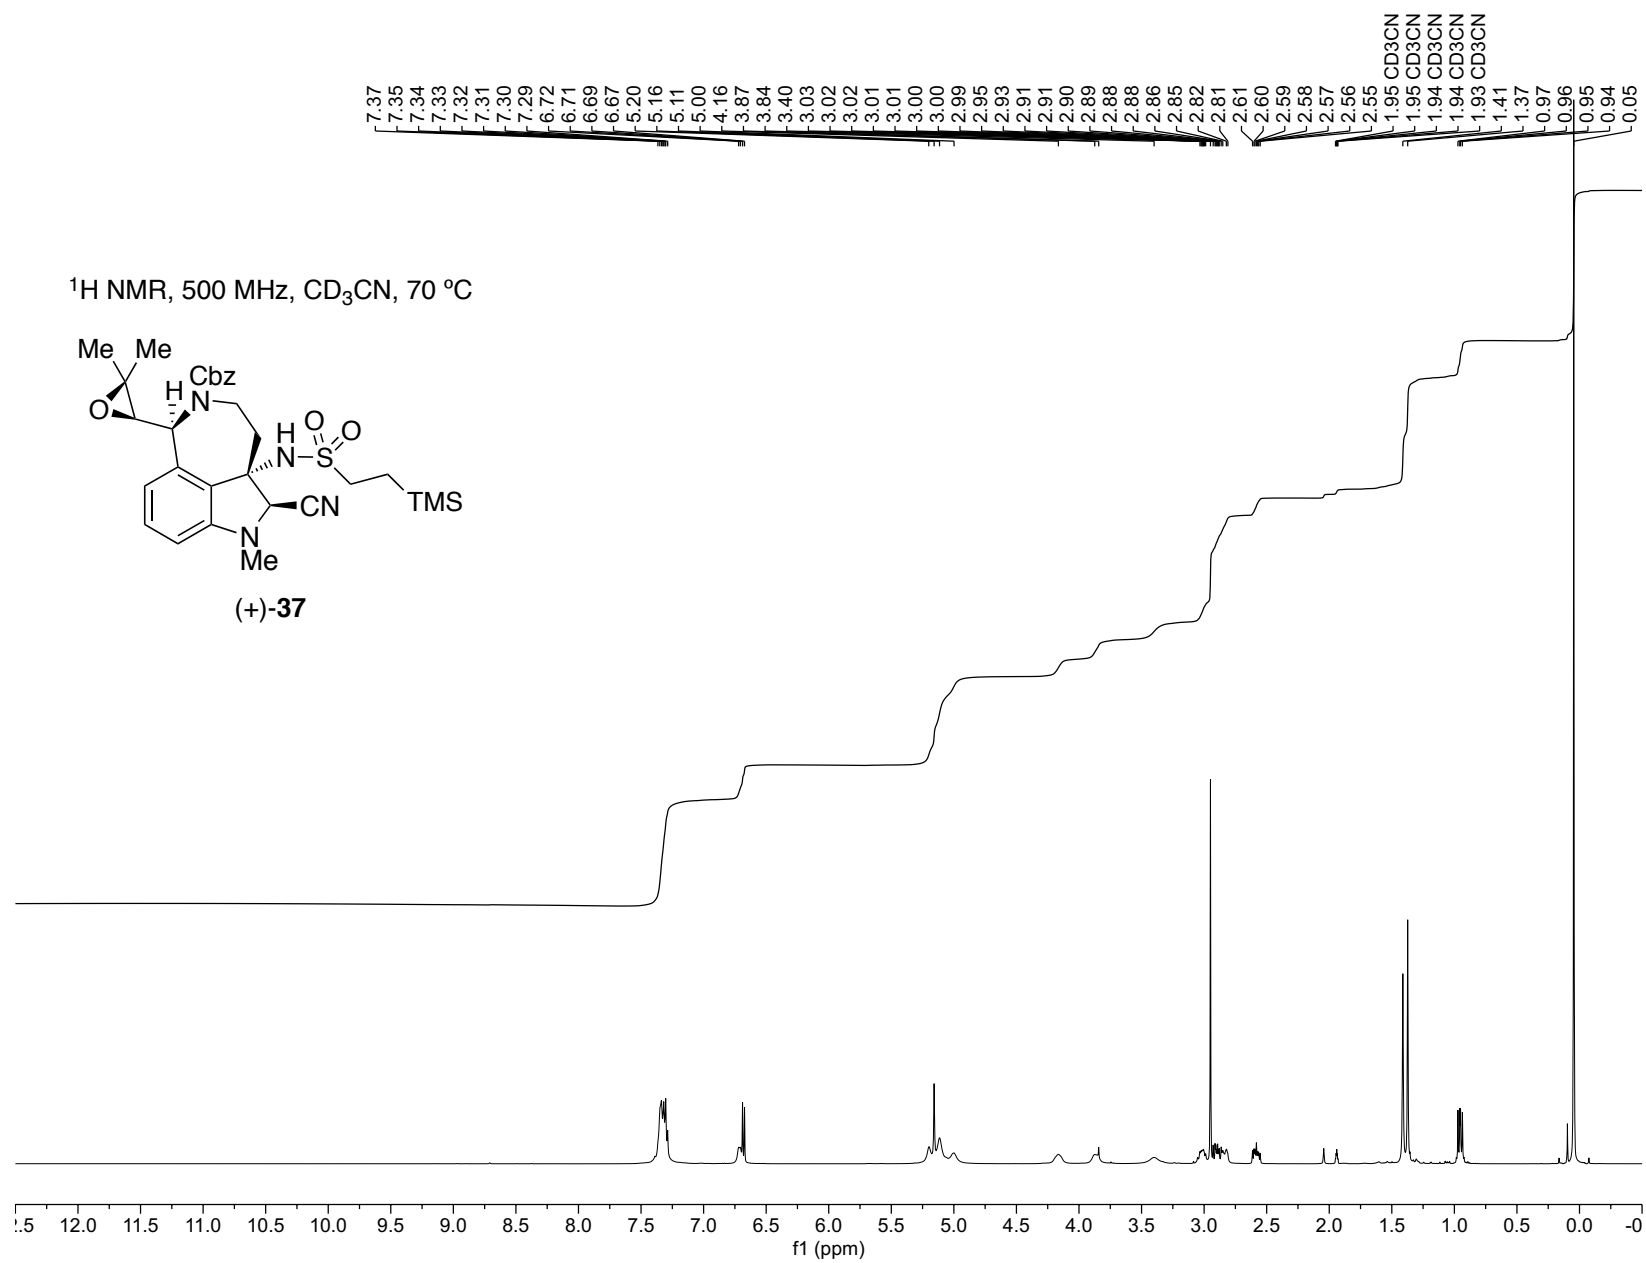



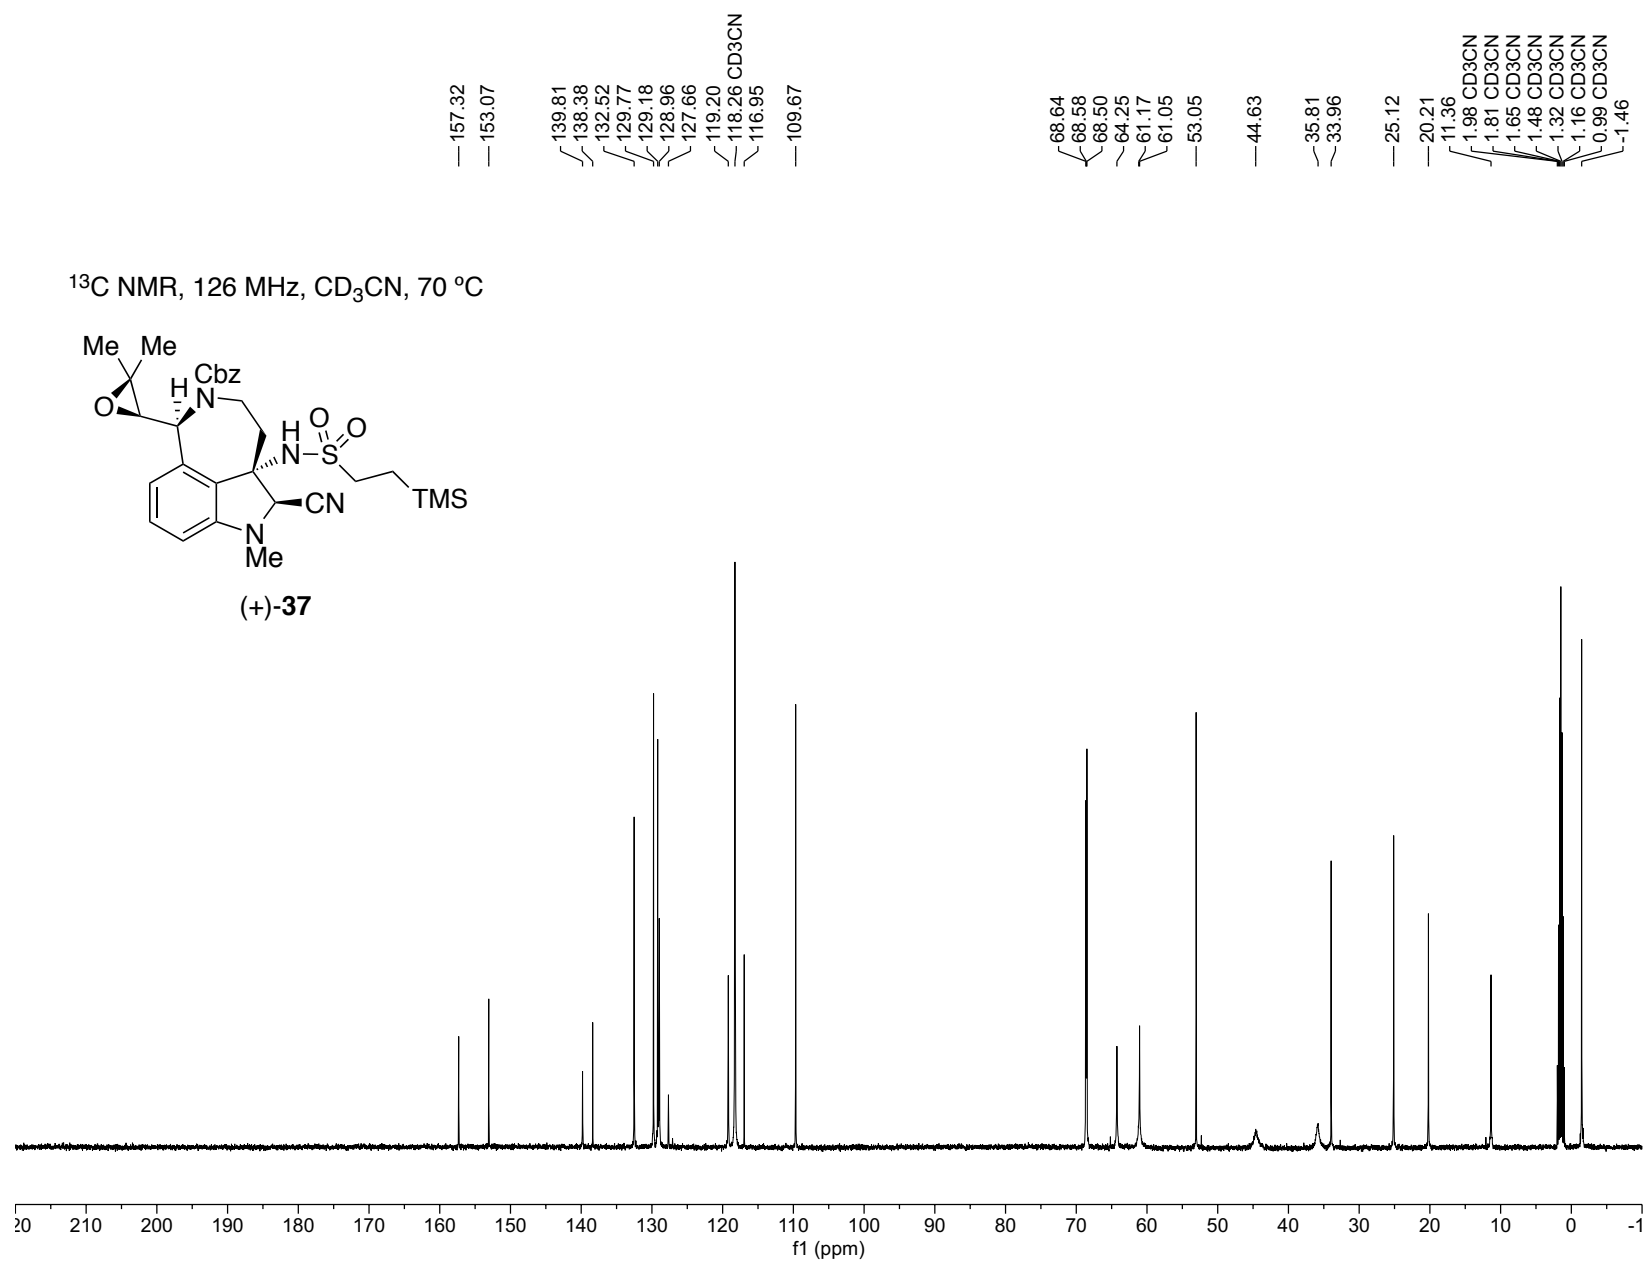

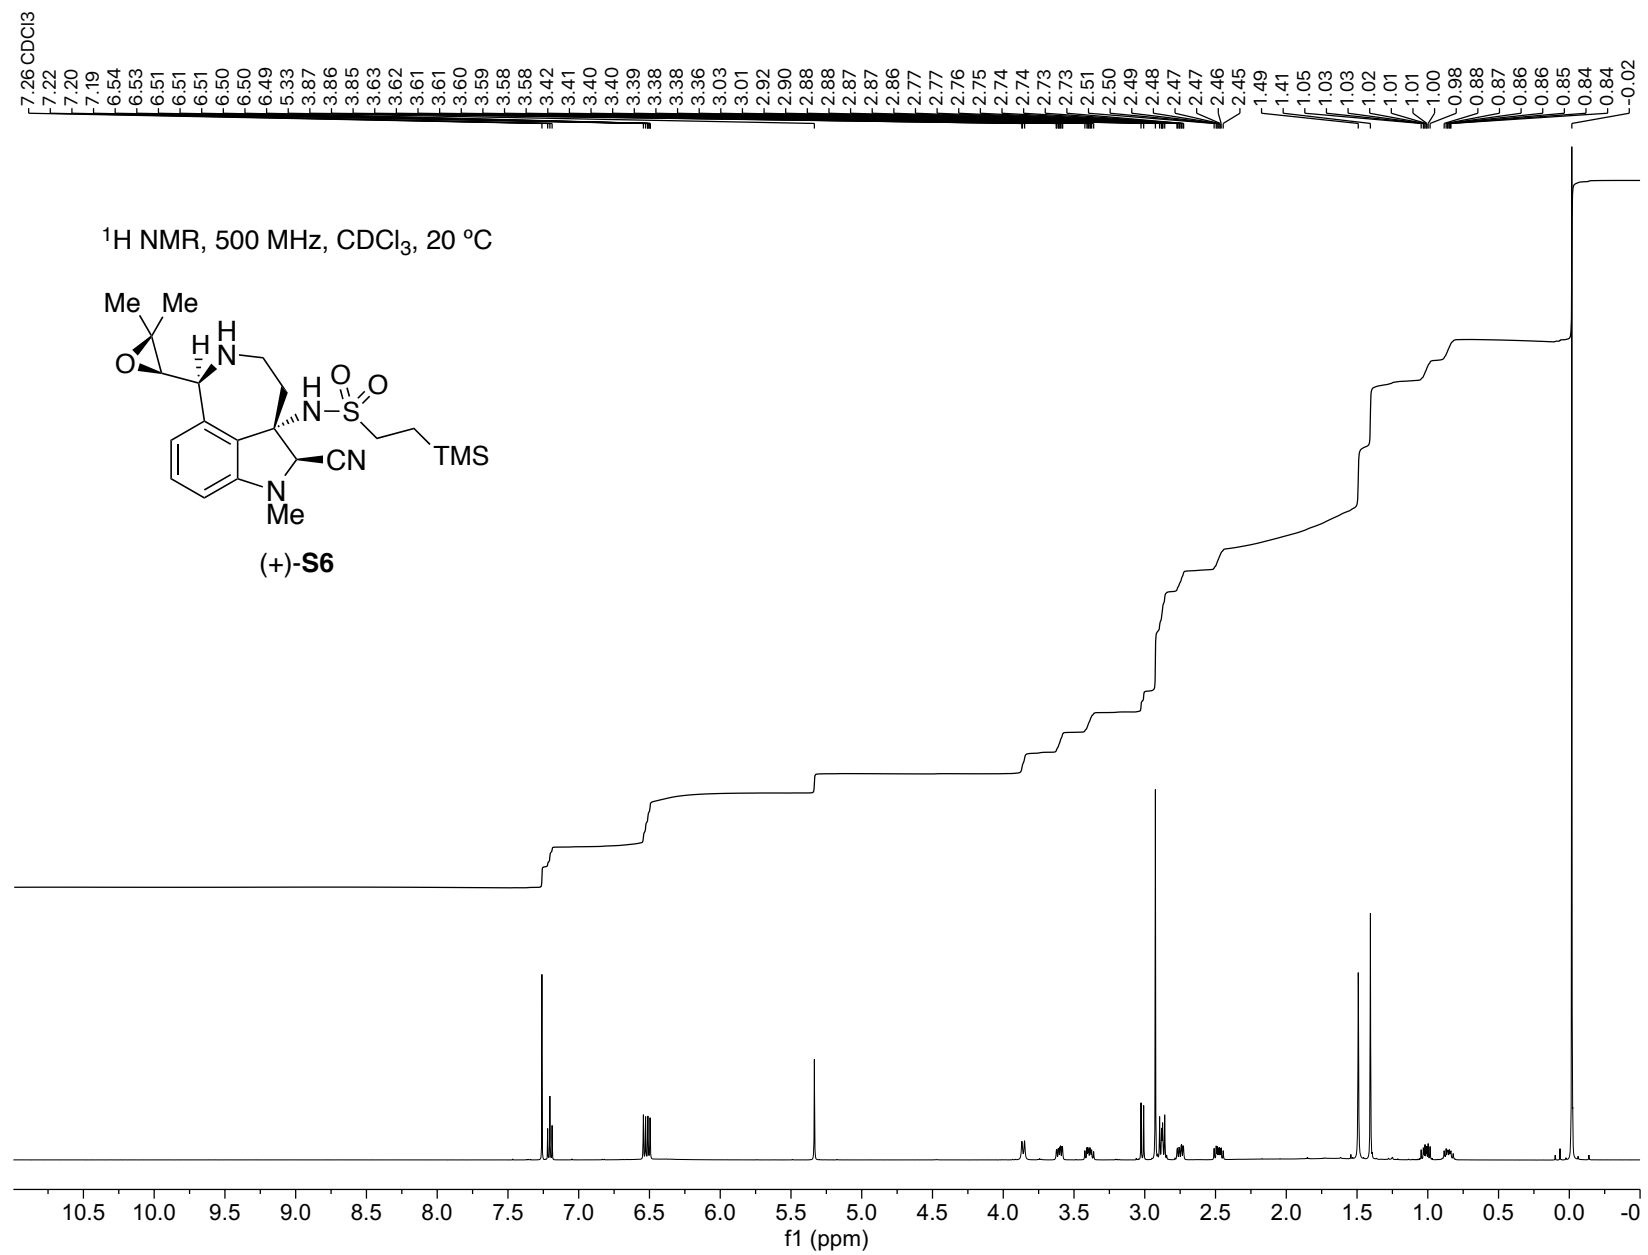

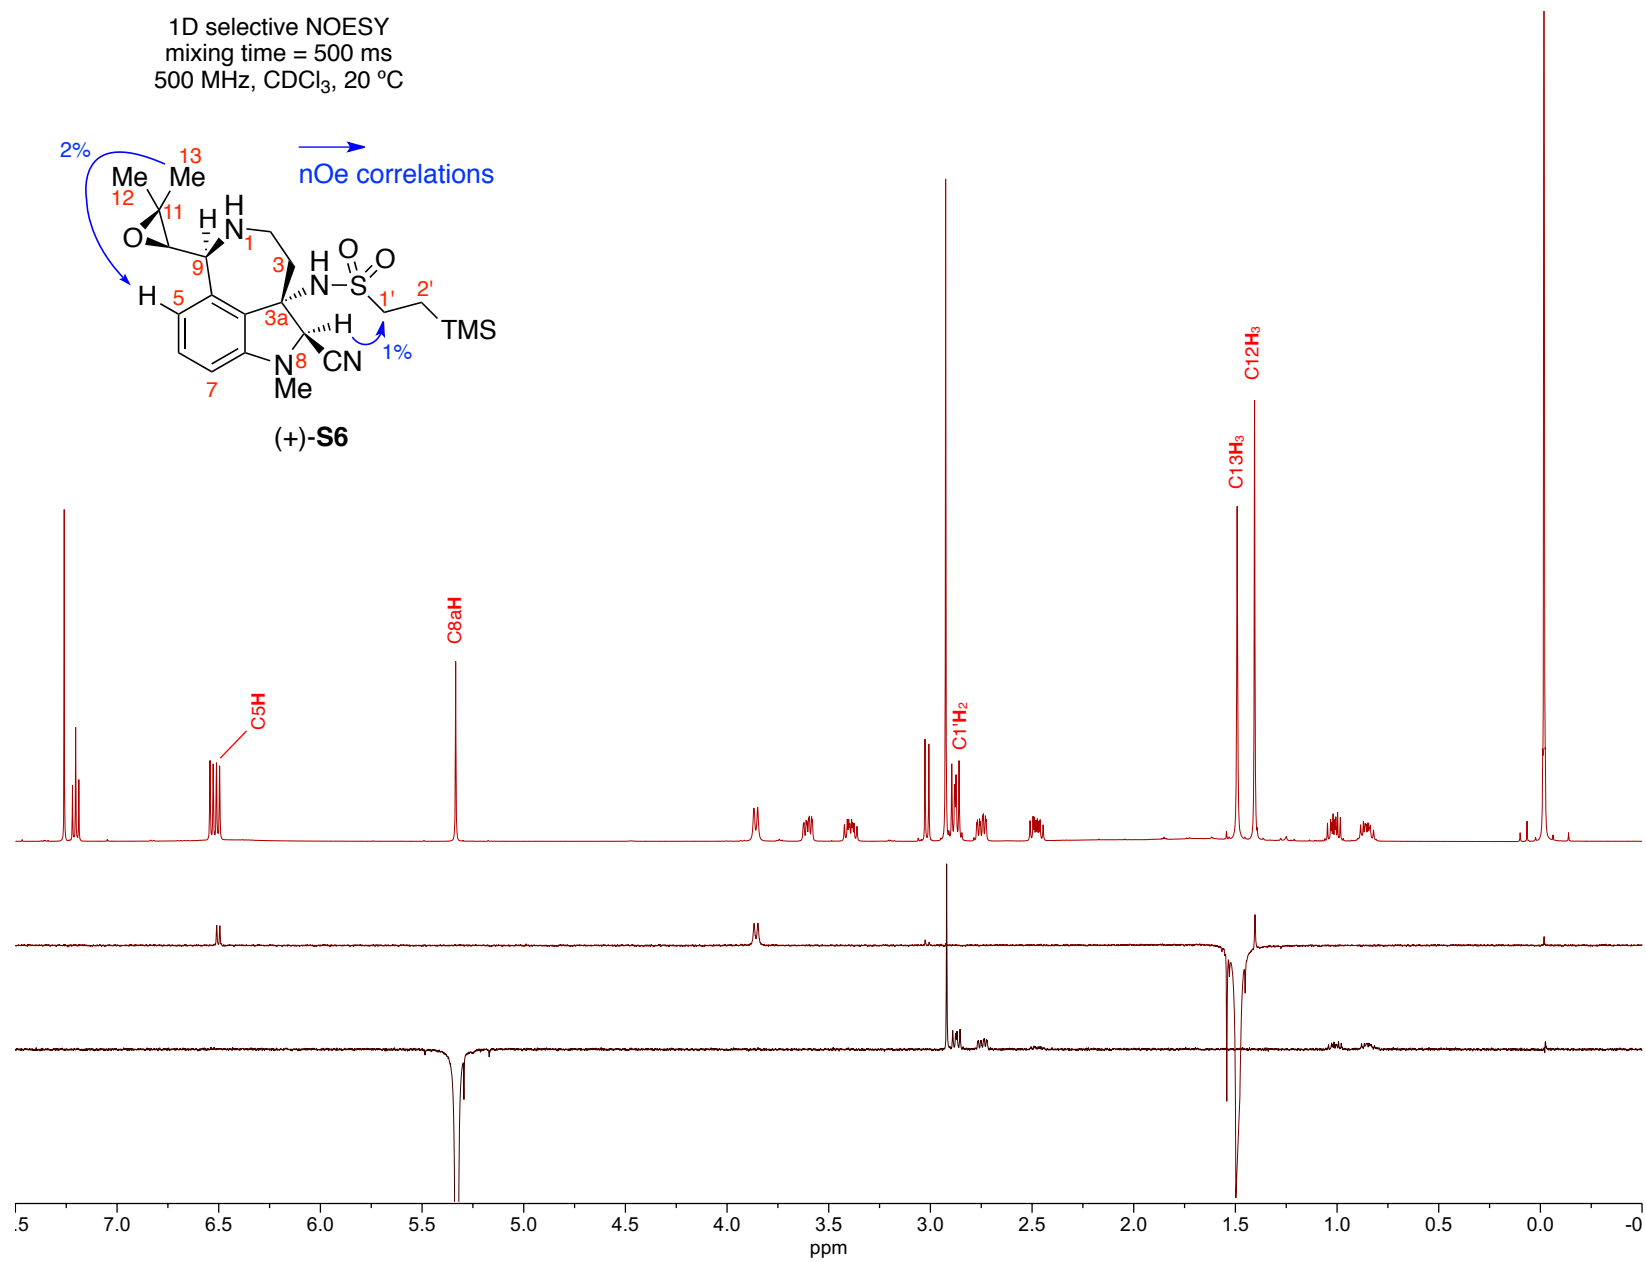



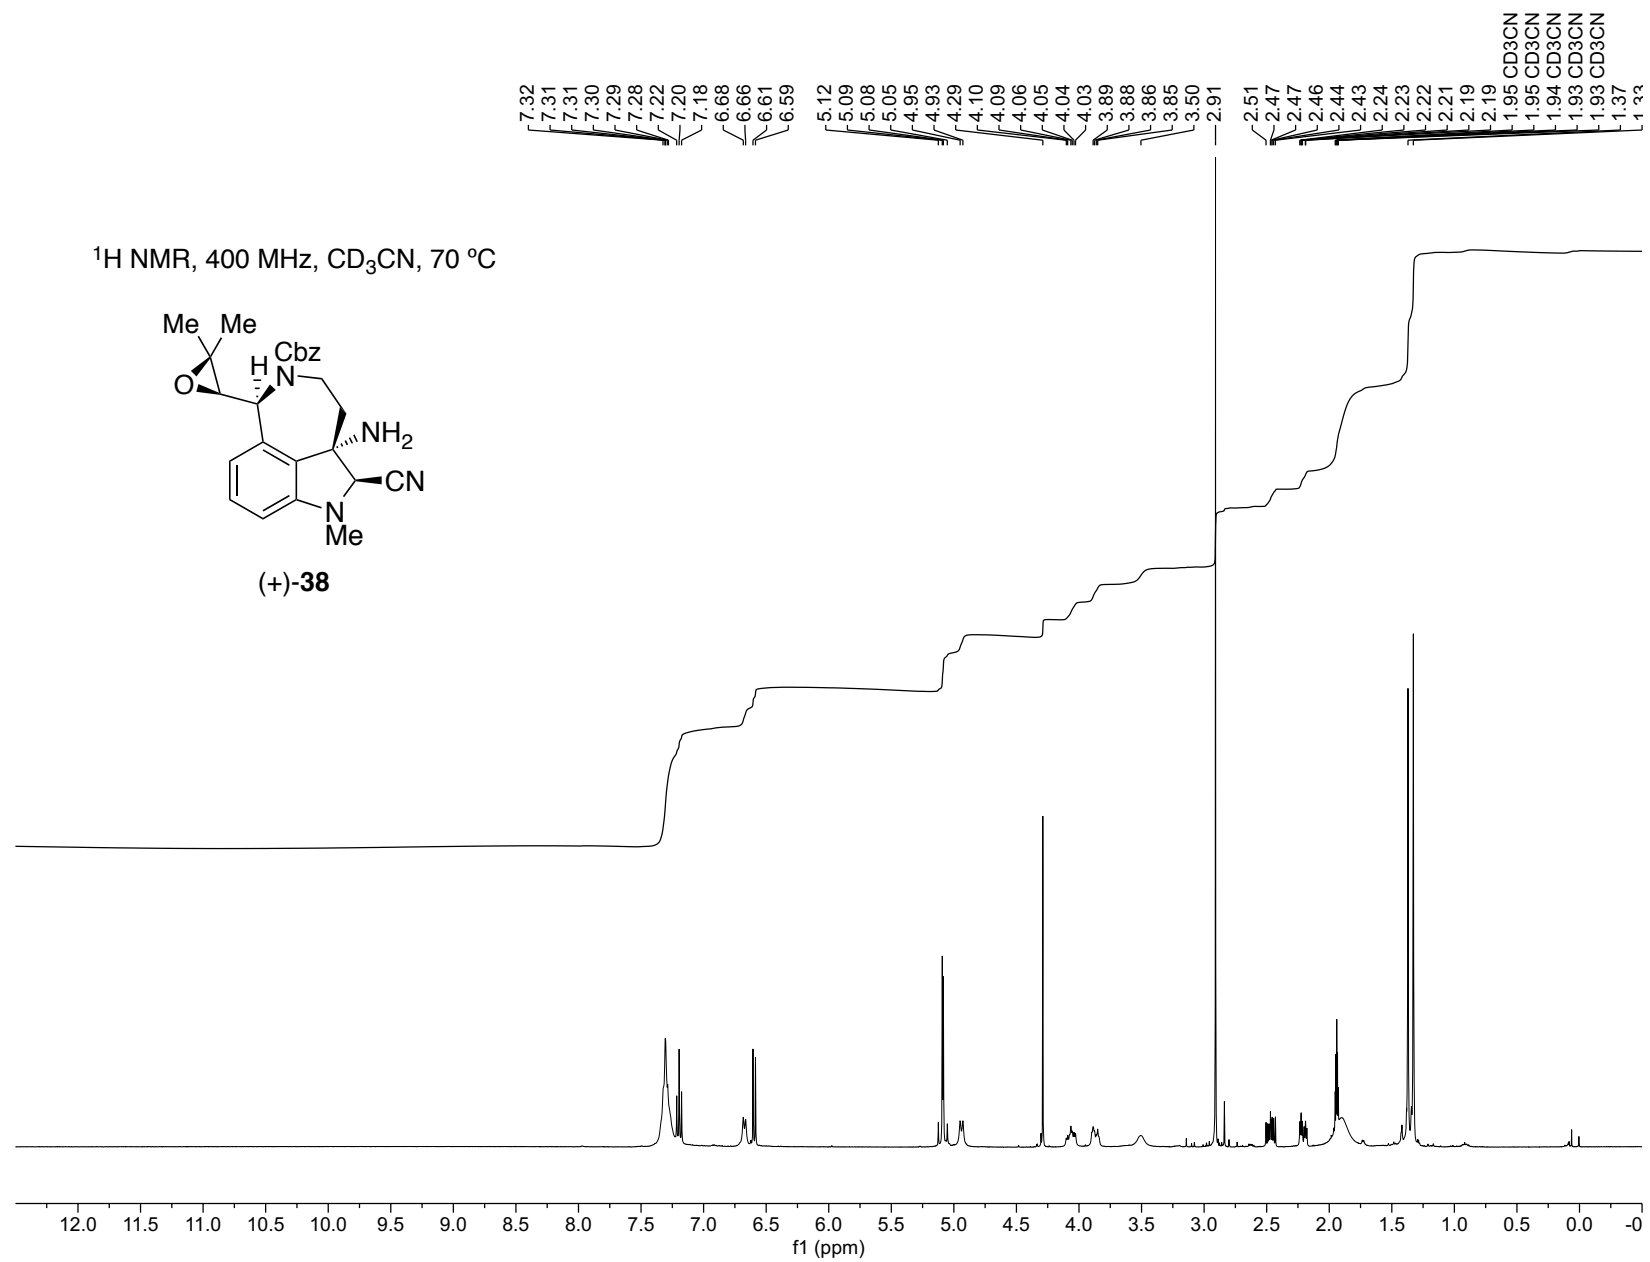

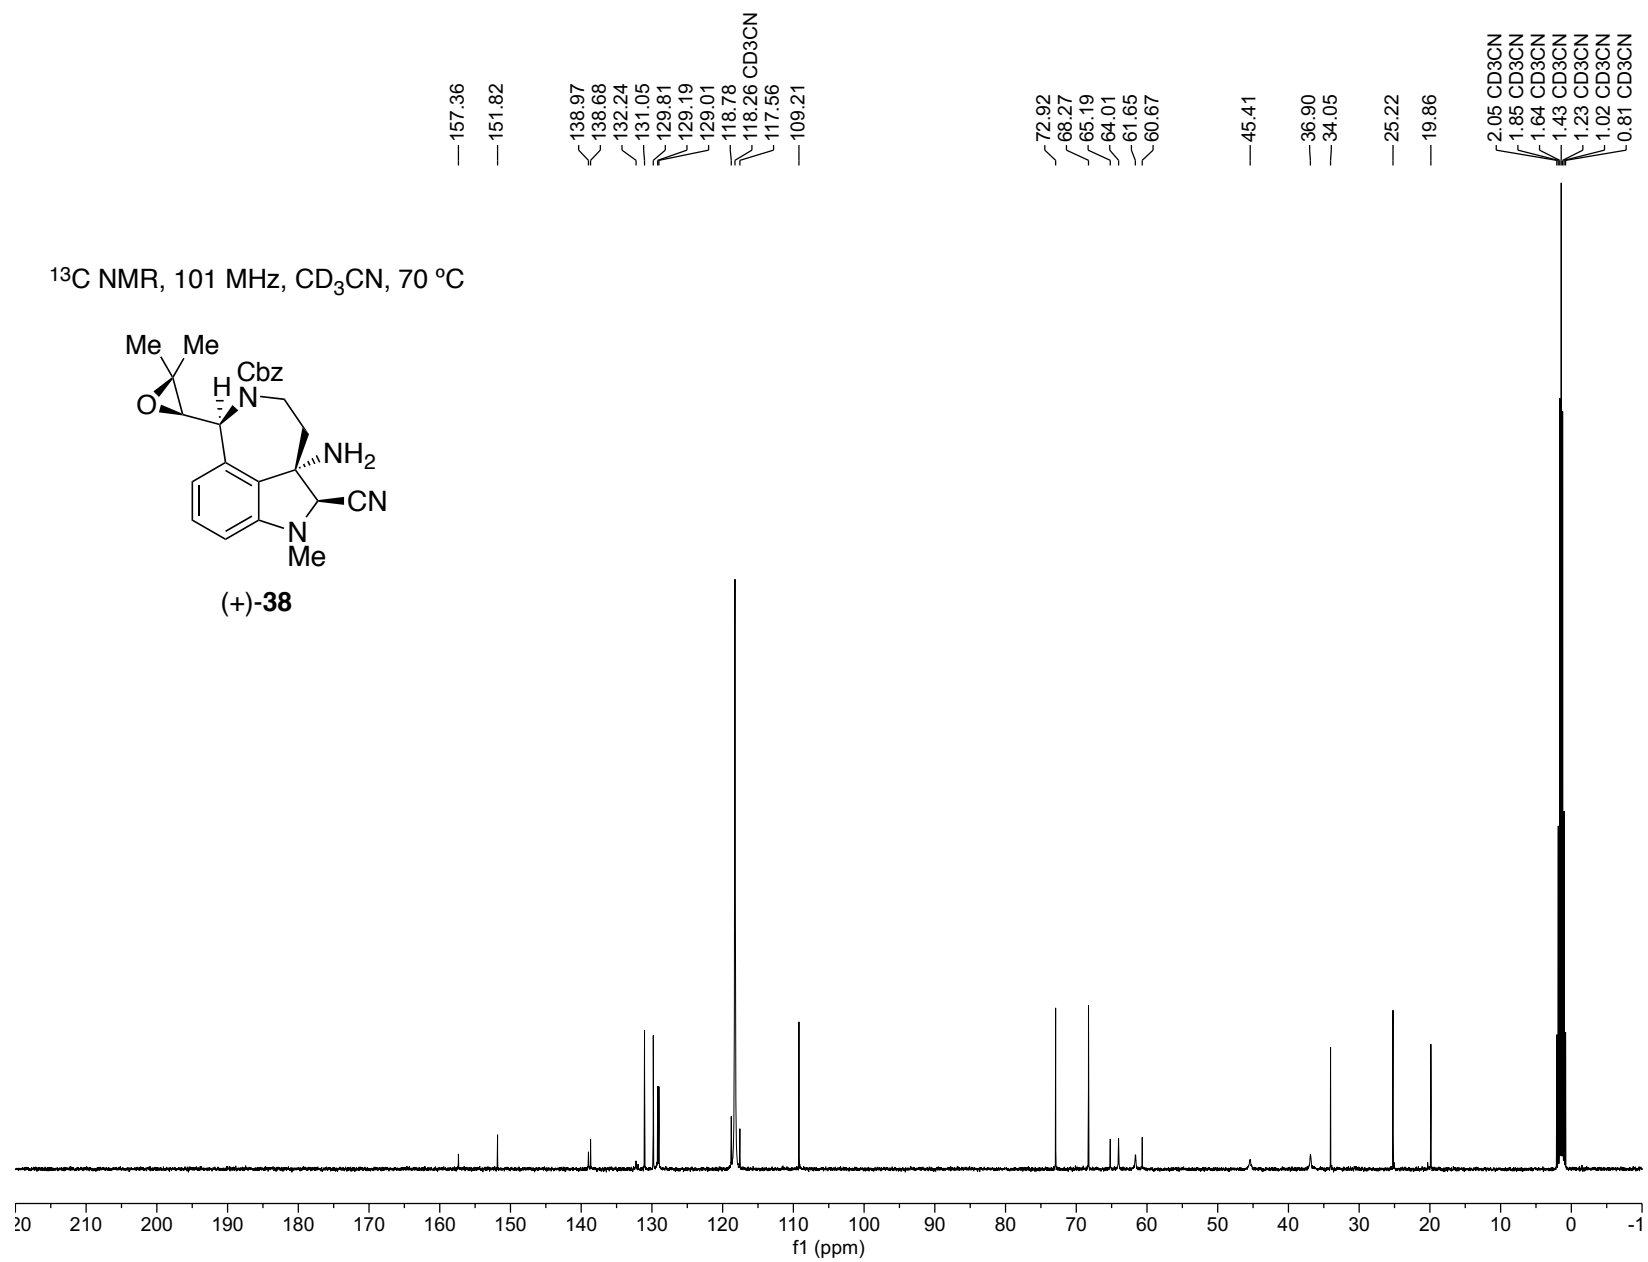

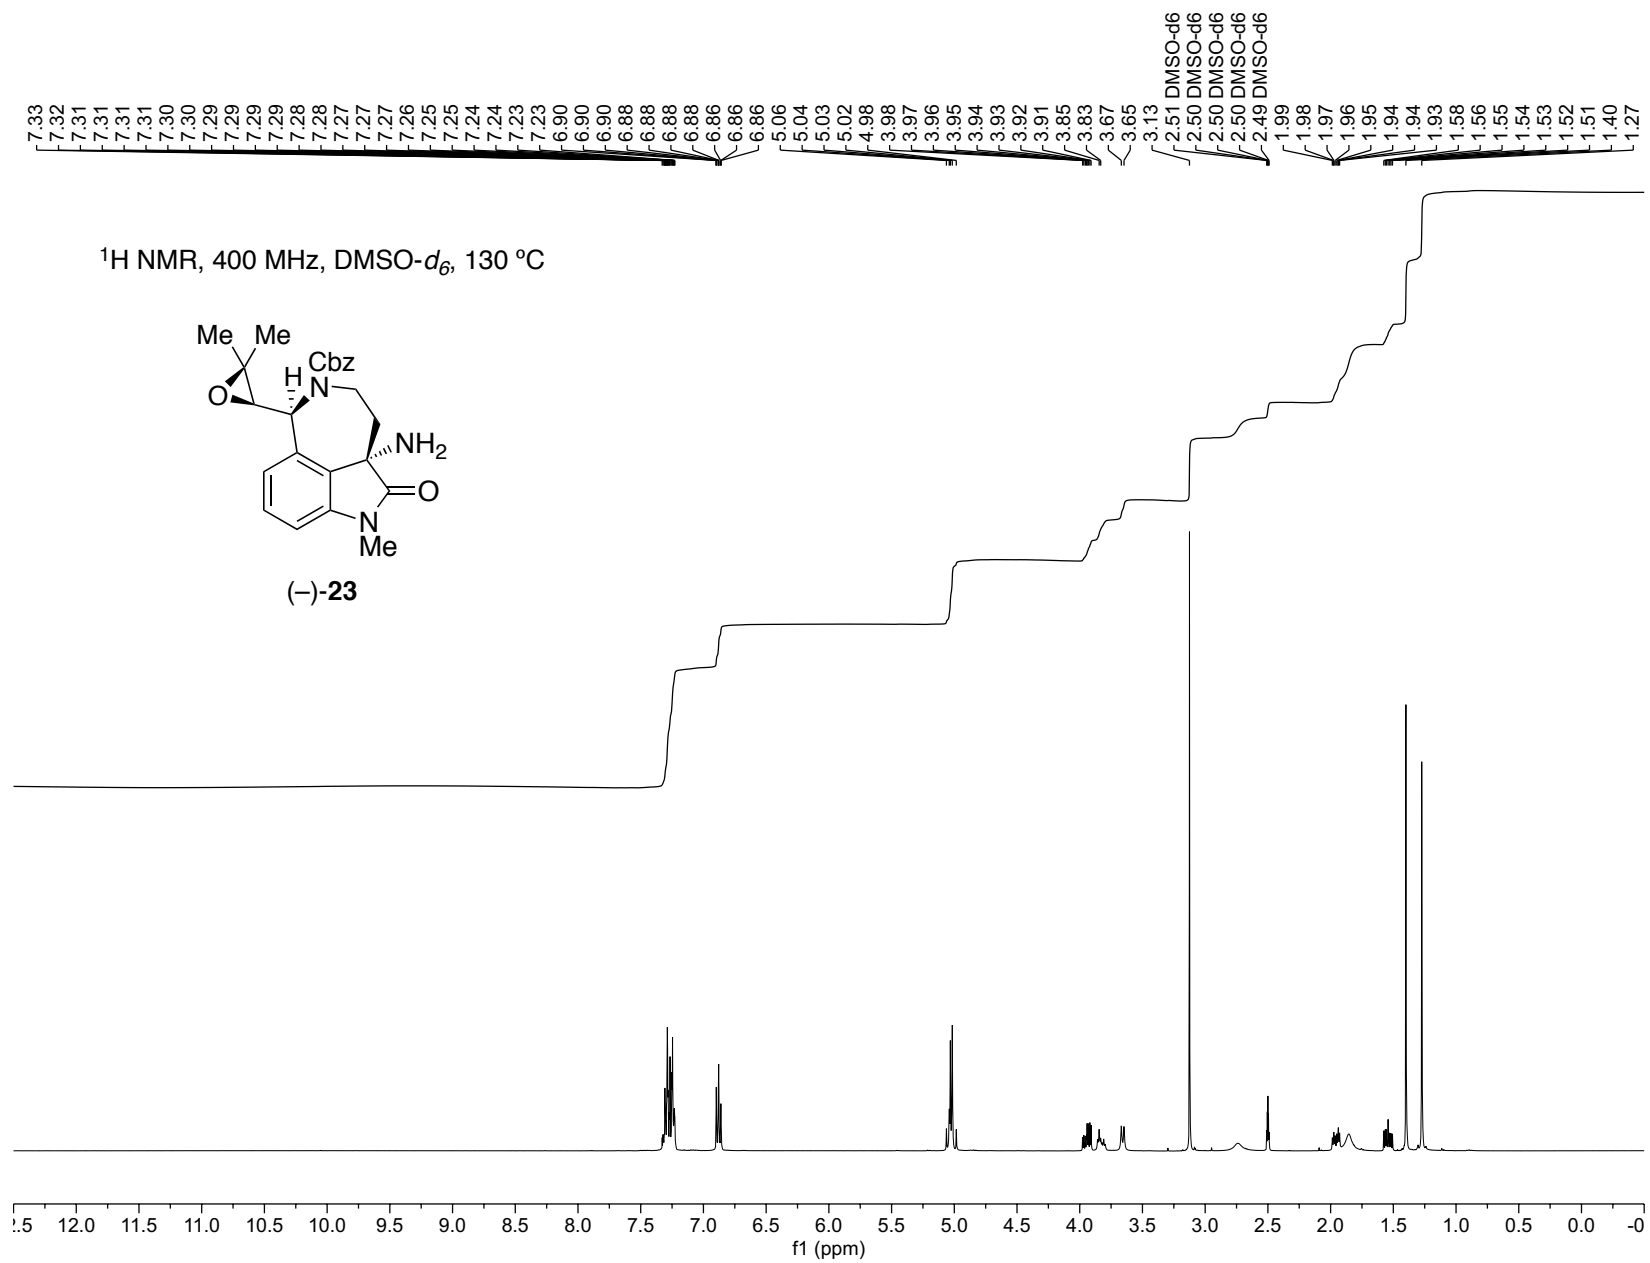

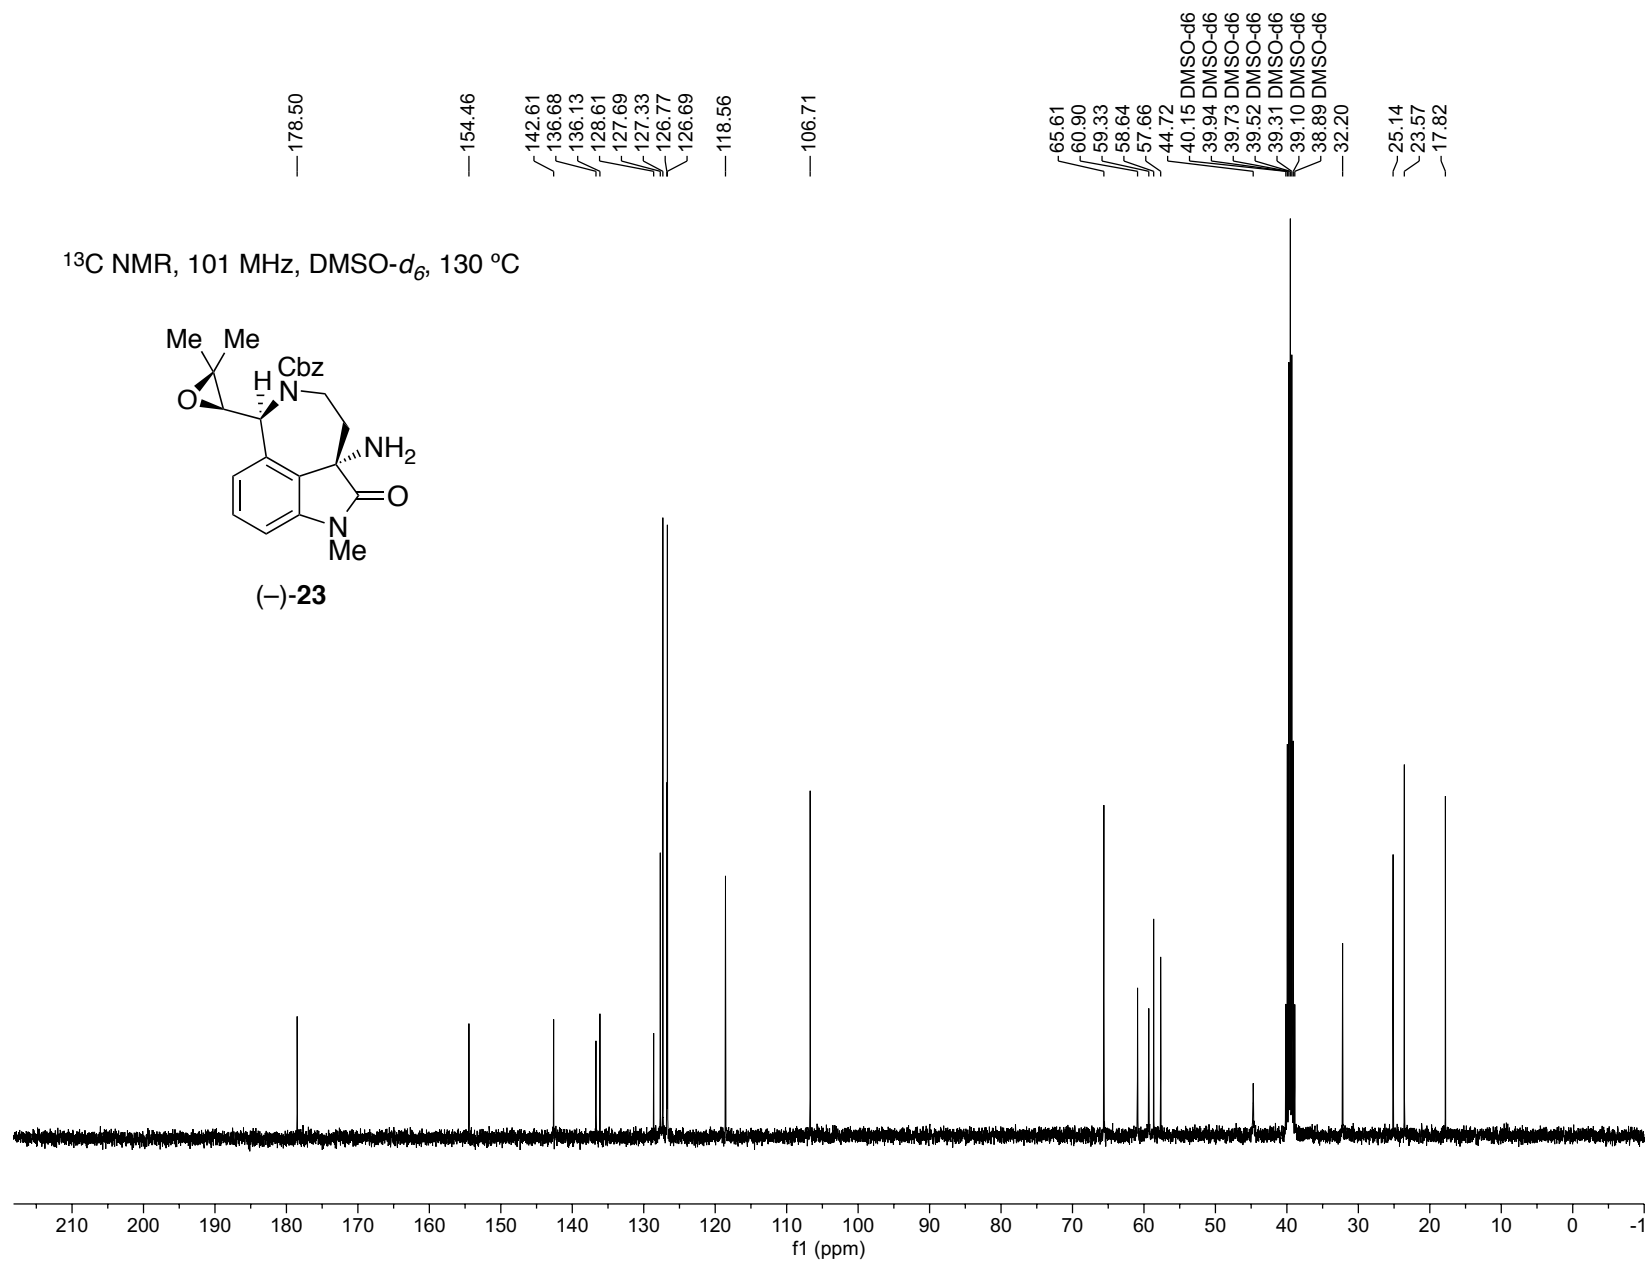





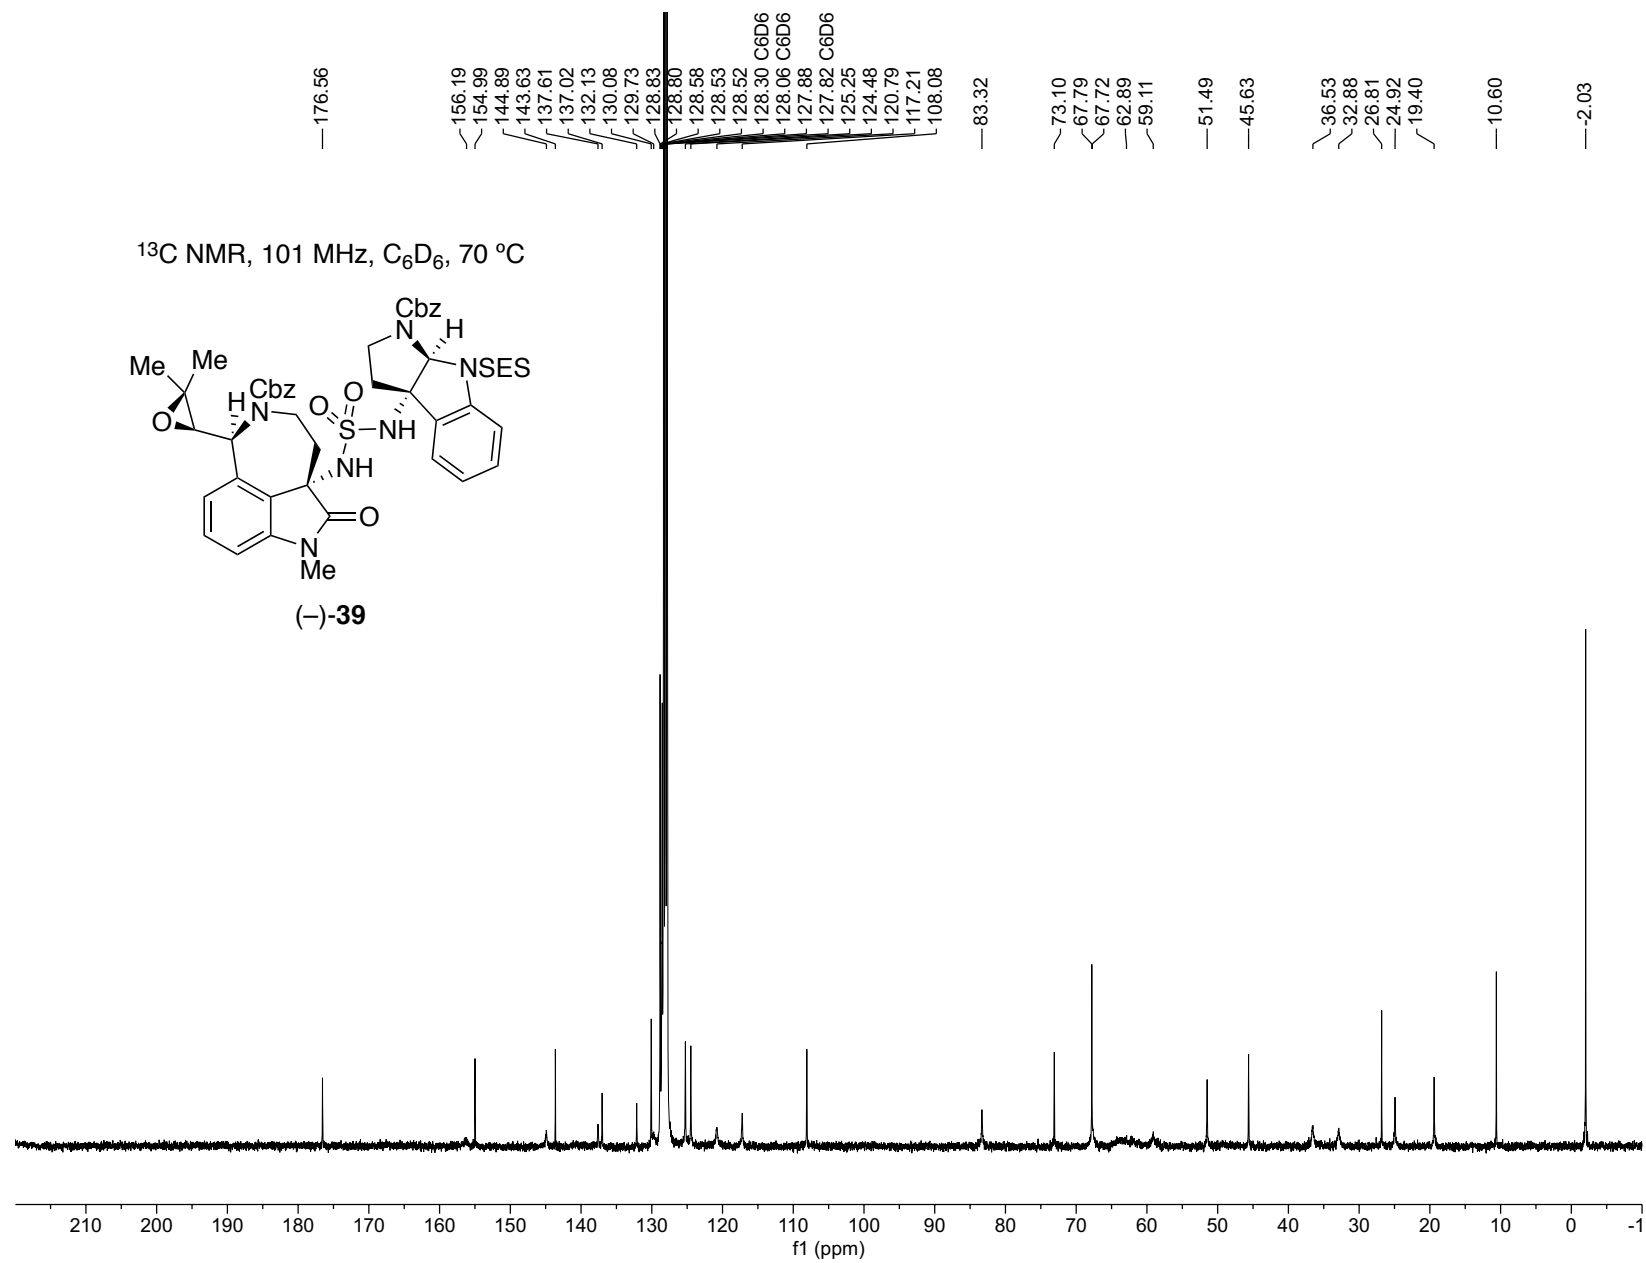

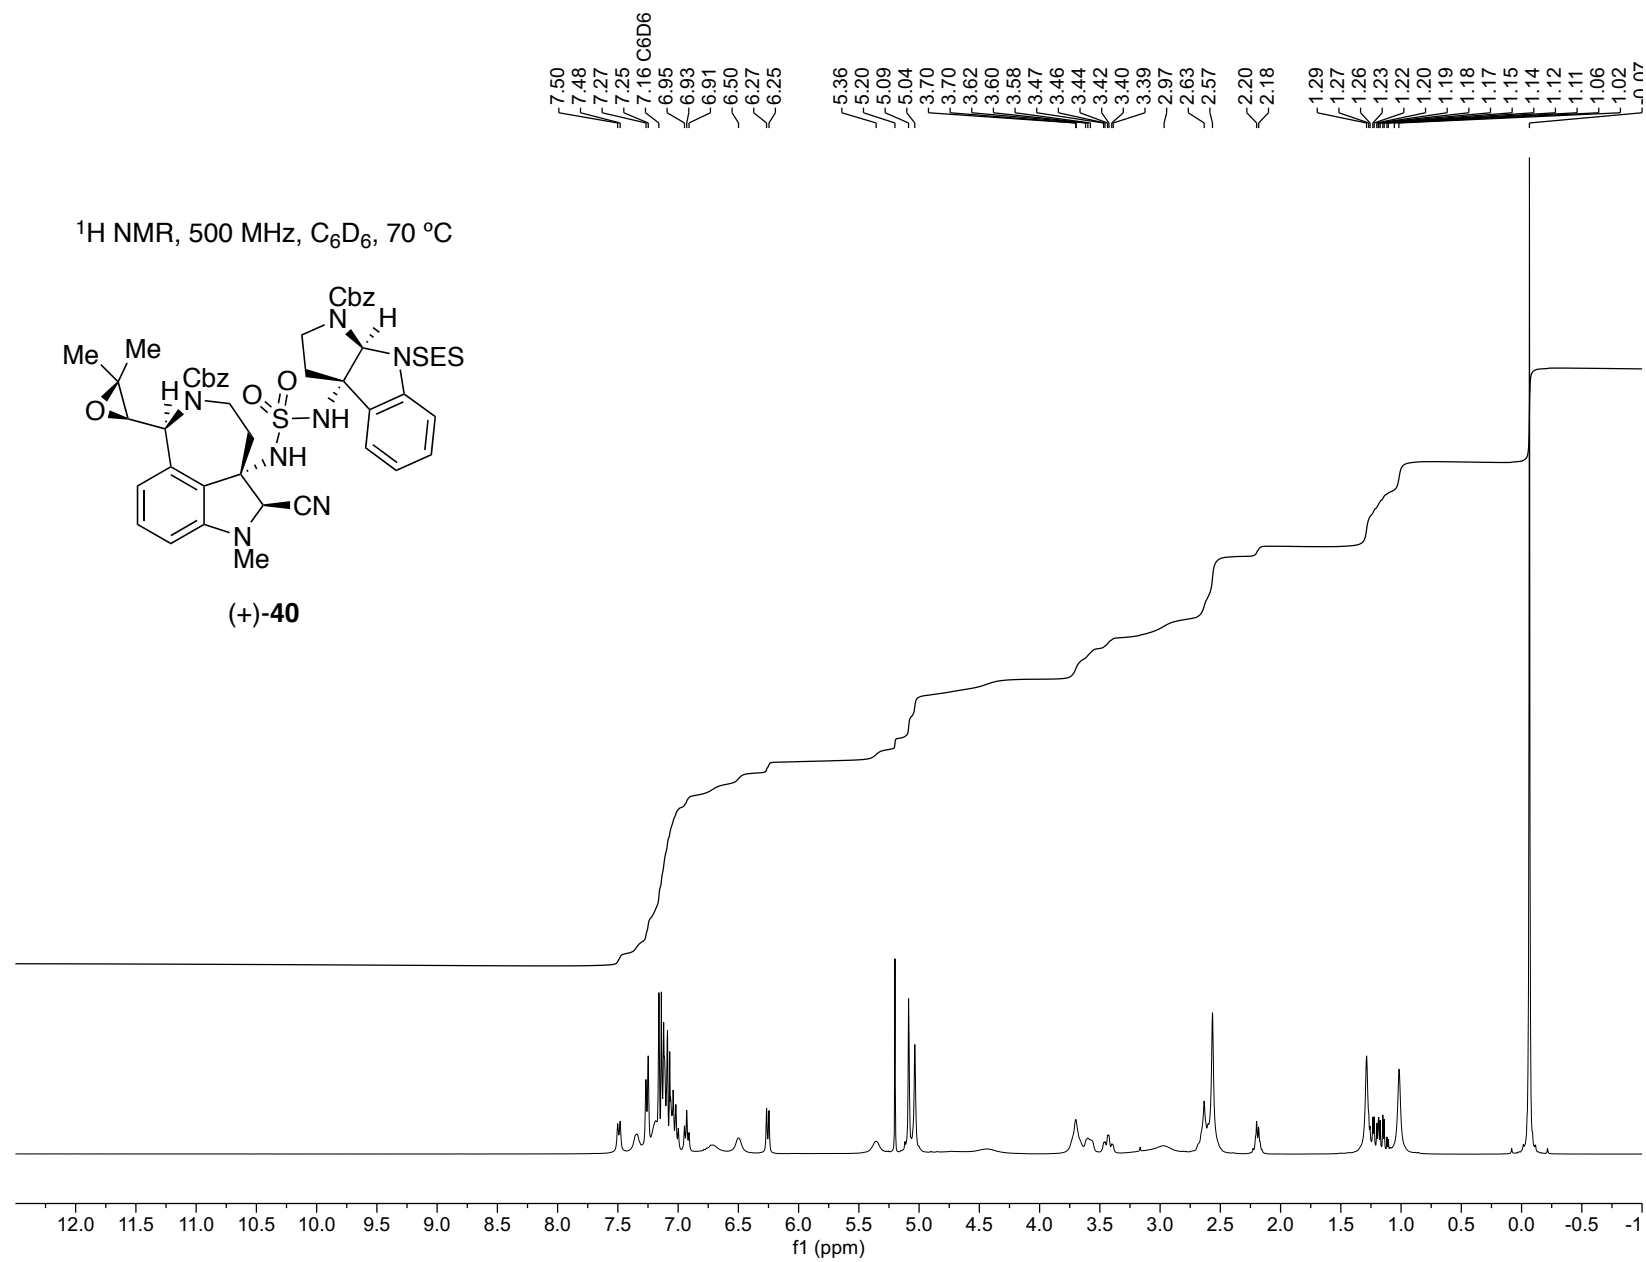

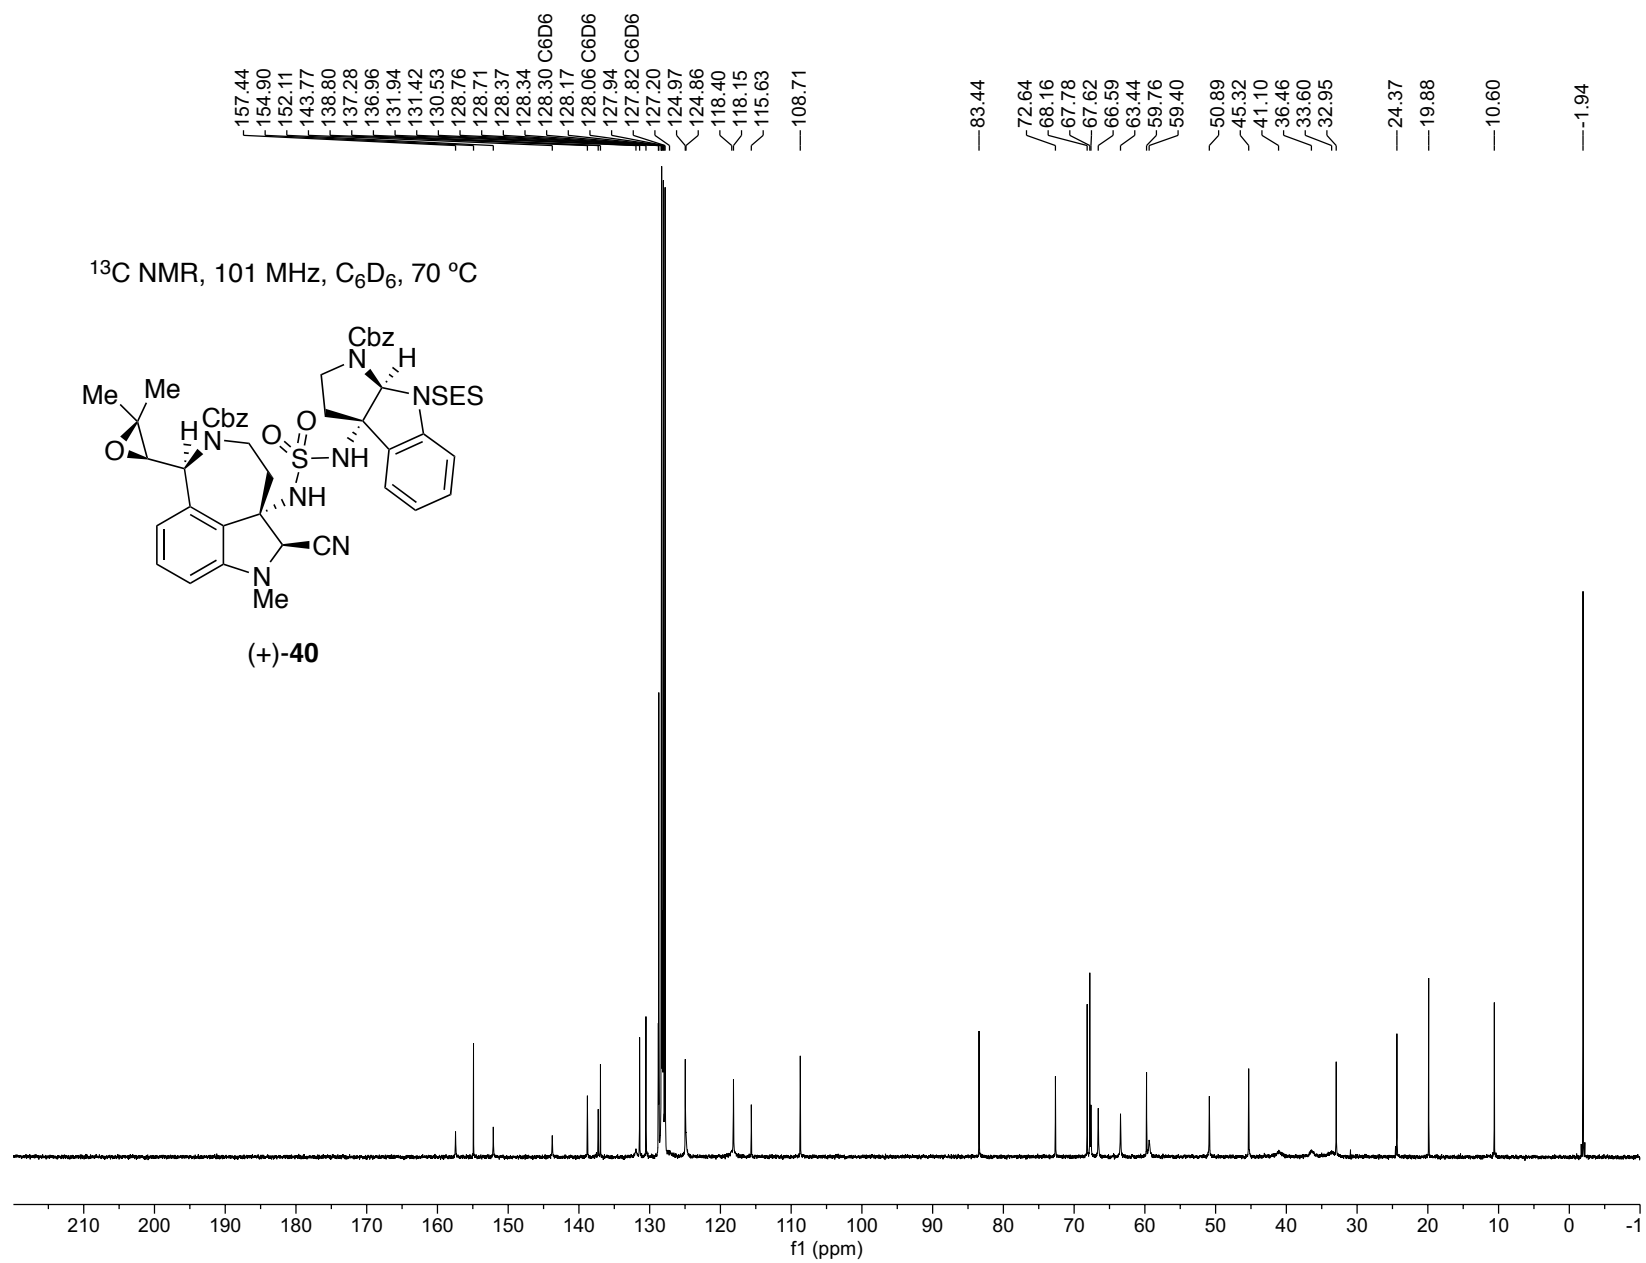

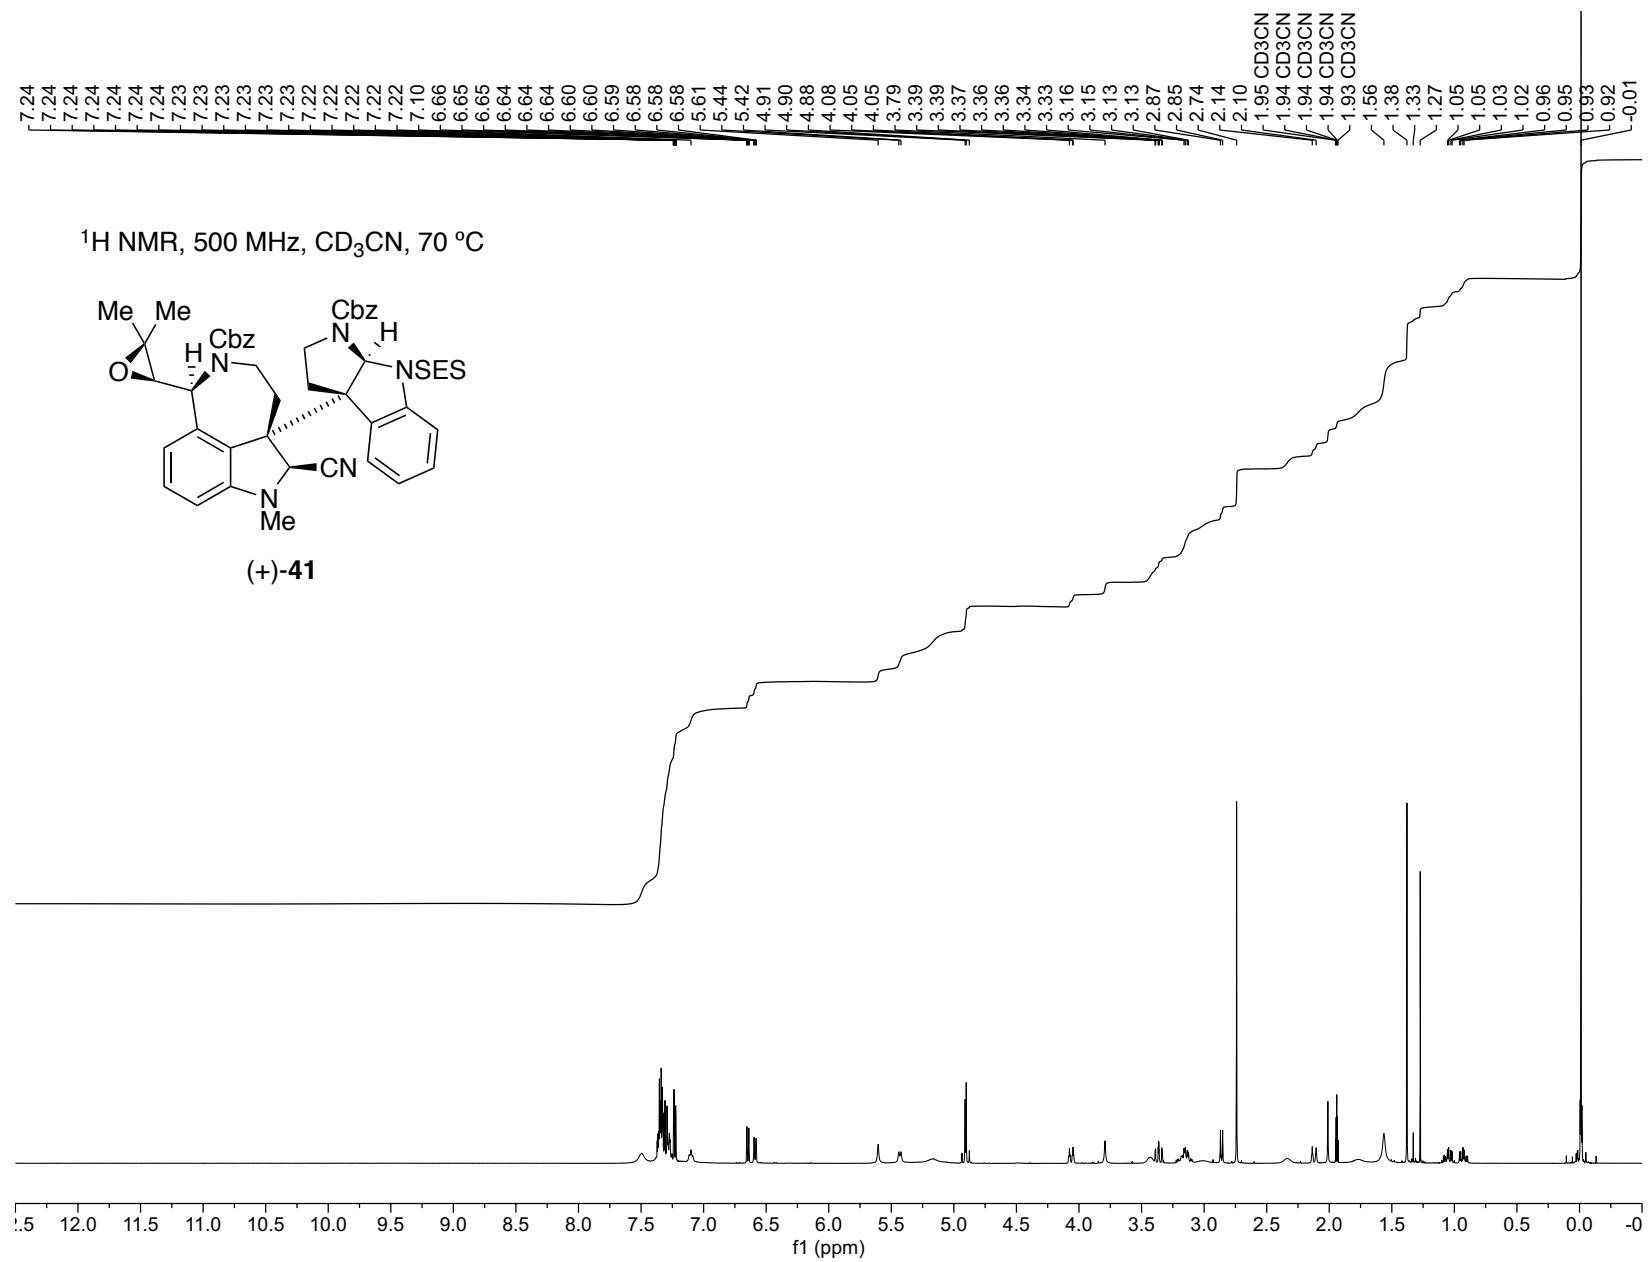

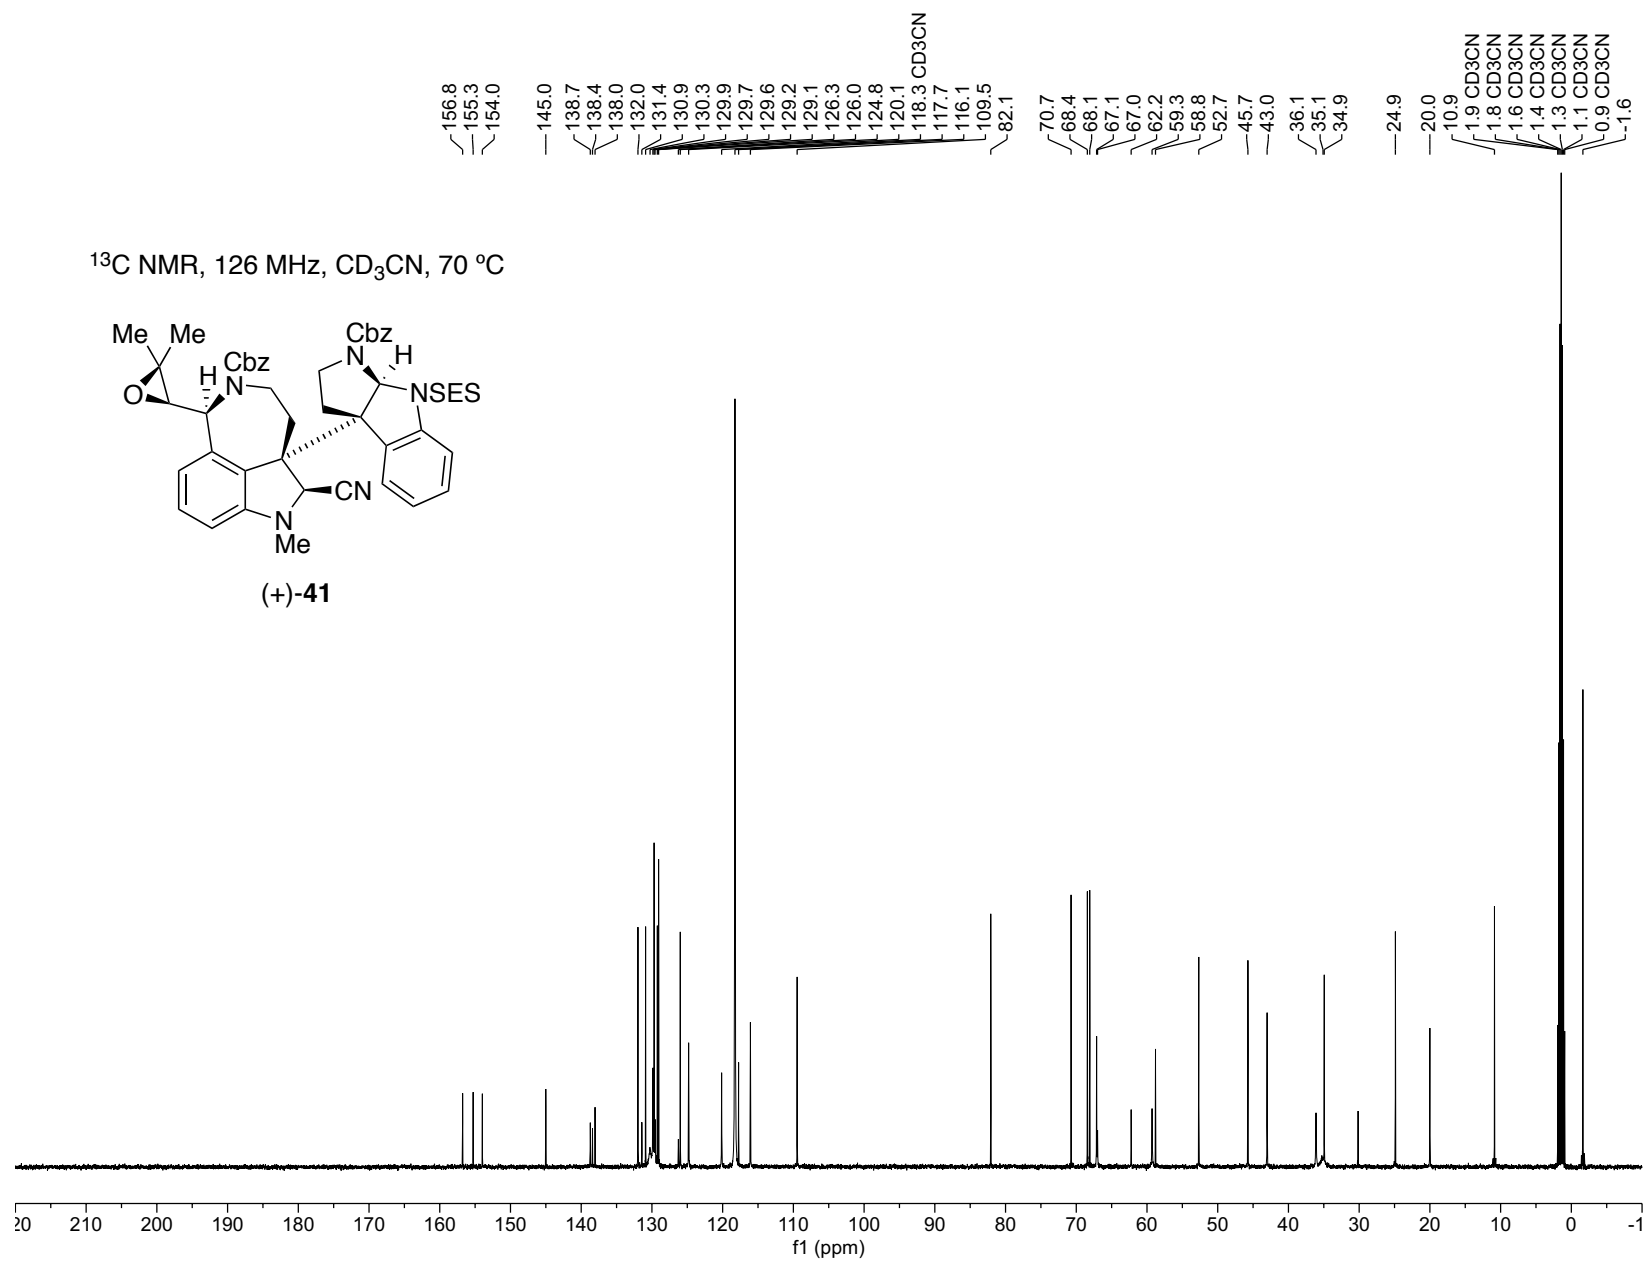



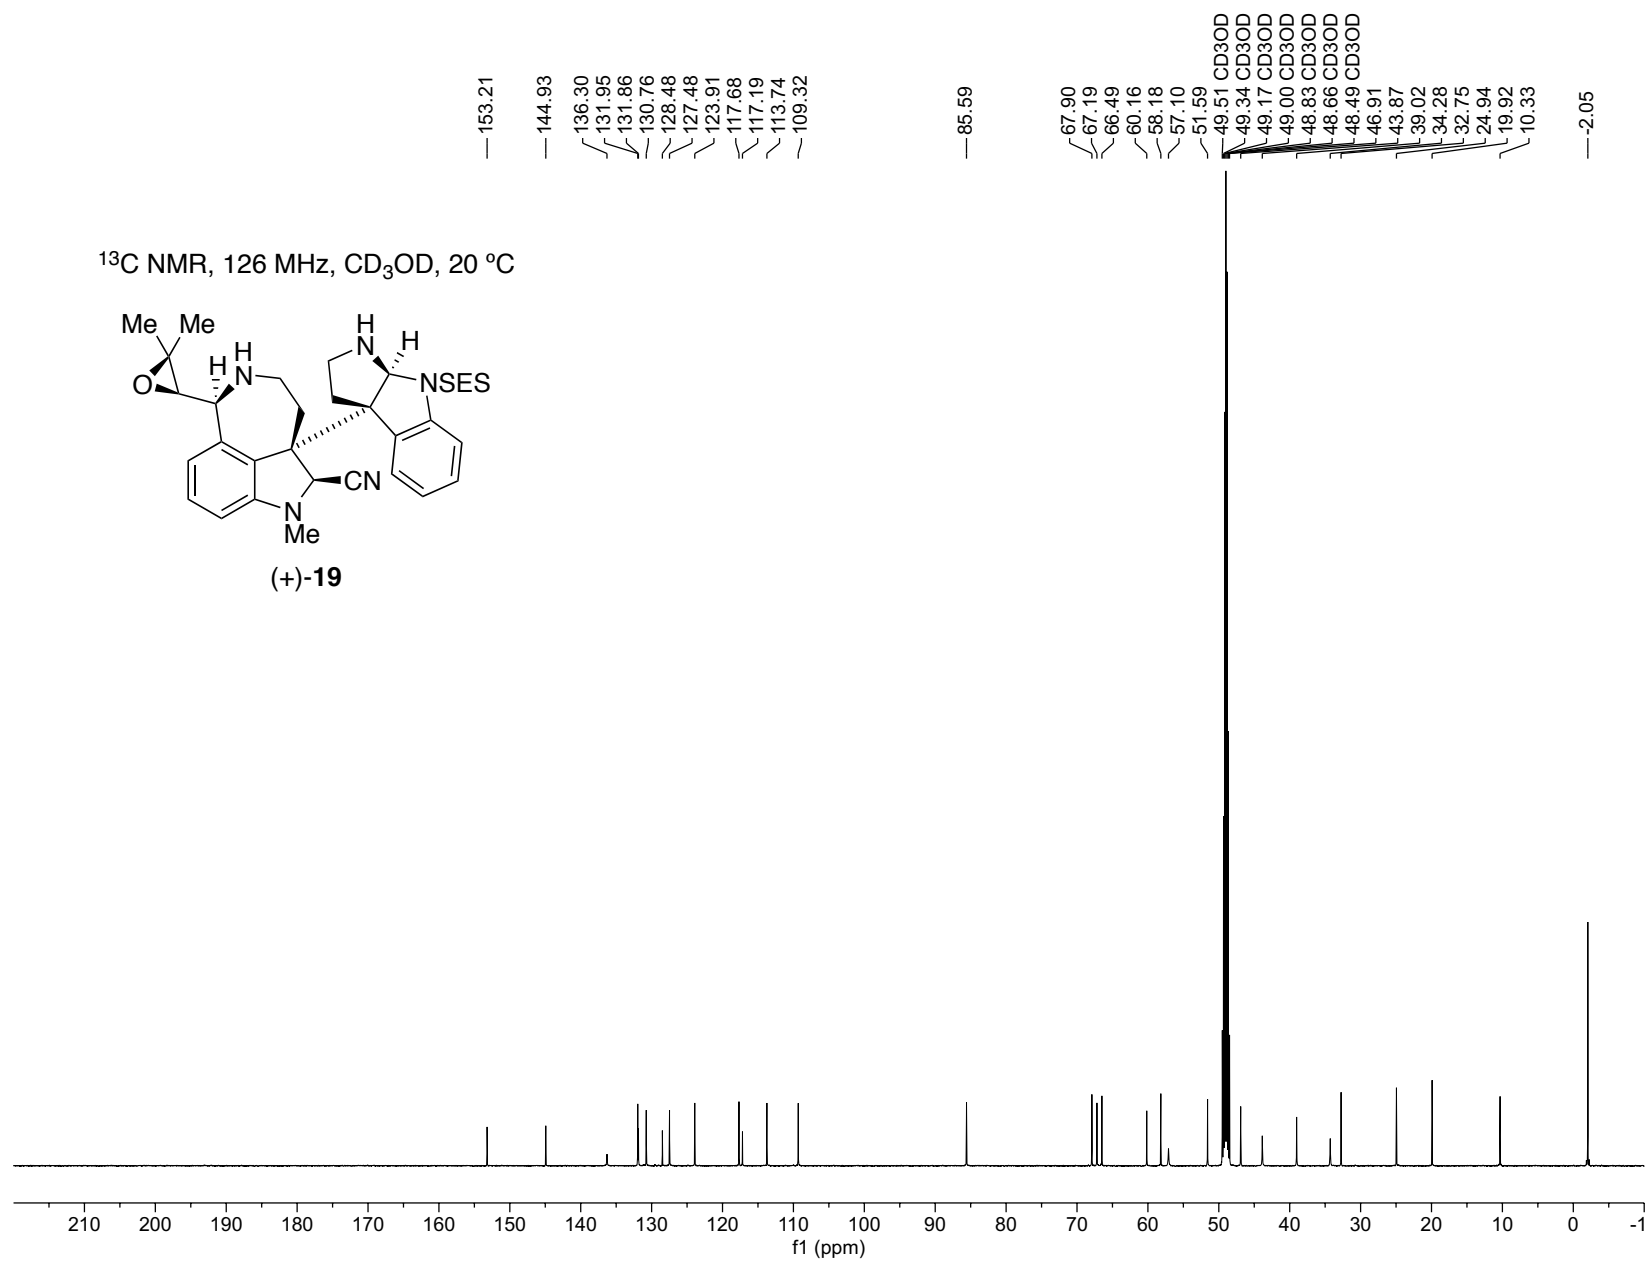



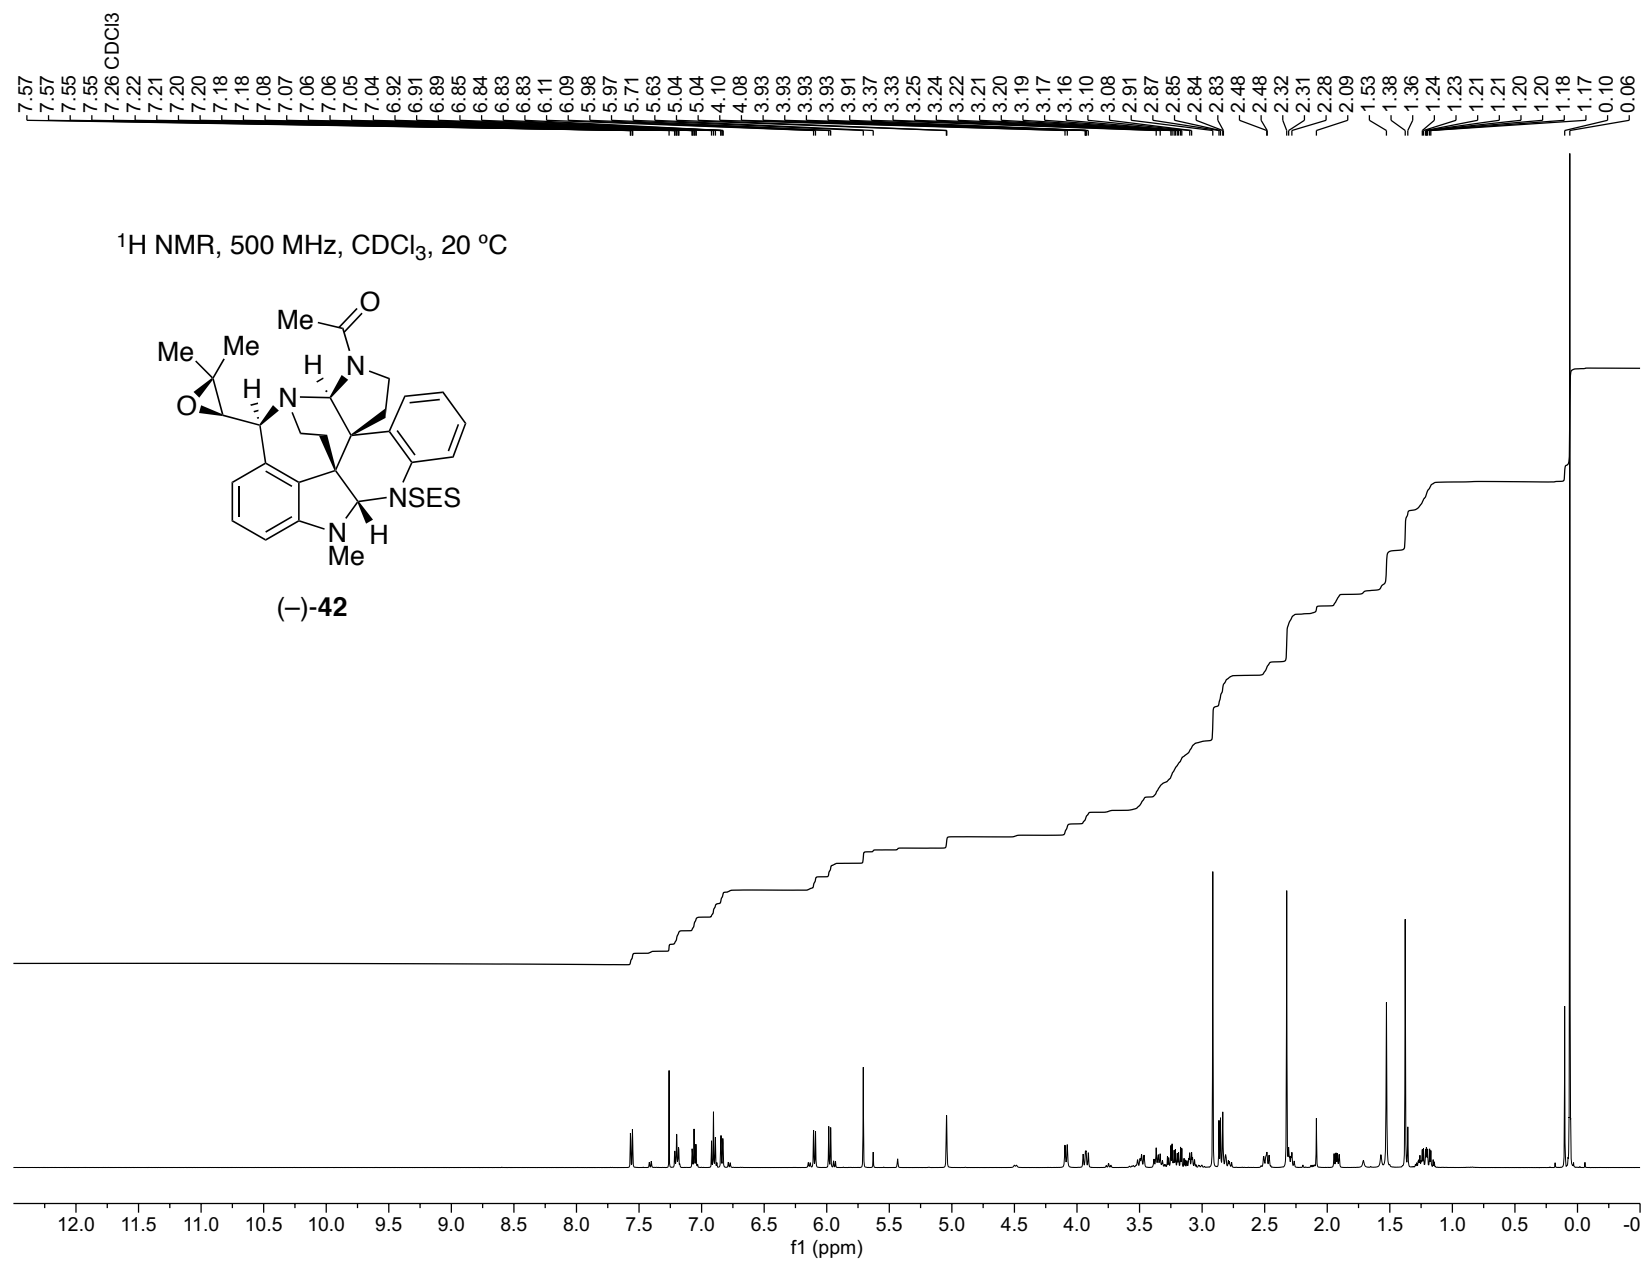

171.77  
170.53  
149.92  
149.45  
139.20  
138.96  
138.35  
137.21  
136.12  
136.07  
131.22  
129.44  
129.19  
127.94  
127.69  
126.76  
126.39  
125.39  
124.89  
124.30  
123.95  
114.64  
113.87  
102.62  
102.28  
85.27  
84.74  
80.03  
78.16  
77.41 CDCl<sub>3</sub>  
77.16 CDCl<sub>3</sub>  
76.91 CDCl<sub>3</sub>  
65.50  
65.17  
63.91  
59.91  
59.87  
54.21  
54.17  
52.50  
52.46  
51.83  
50.26  
45.90  
44.15  
38.01  
37.93  
37.71  
36.56  
33.31  
31.72  
31.01  
30.88  
24.88  
24.82  
23.10  
22.83  
20.61  
20.45  
10.77  
10.68  
-1.75  
-1.79

<sup>13</sup>C NMR, 126 MHz, CDCl<sub>3</sub>, 20 °C

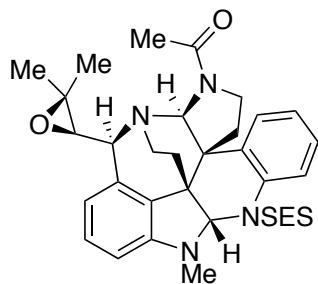

(-)-42

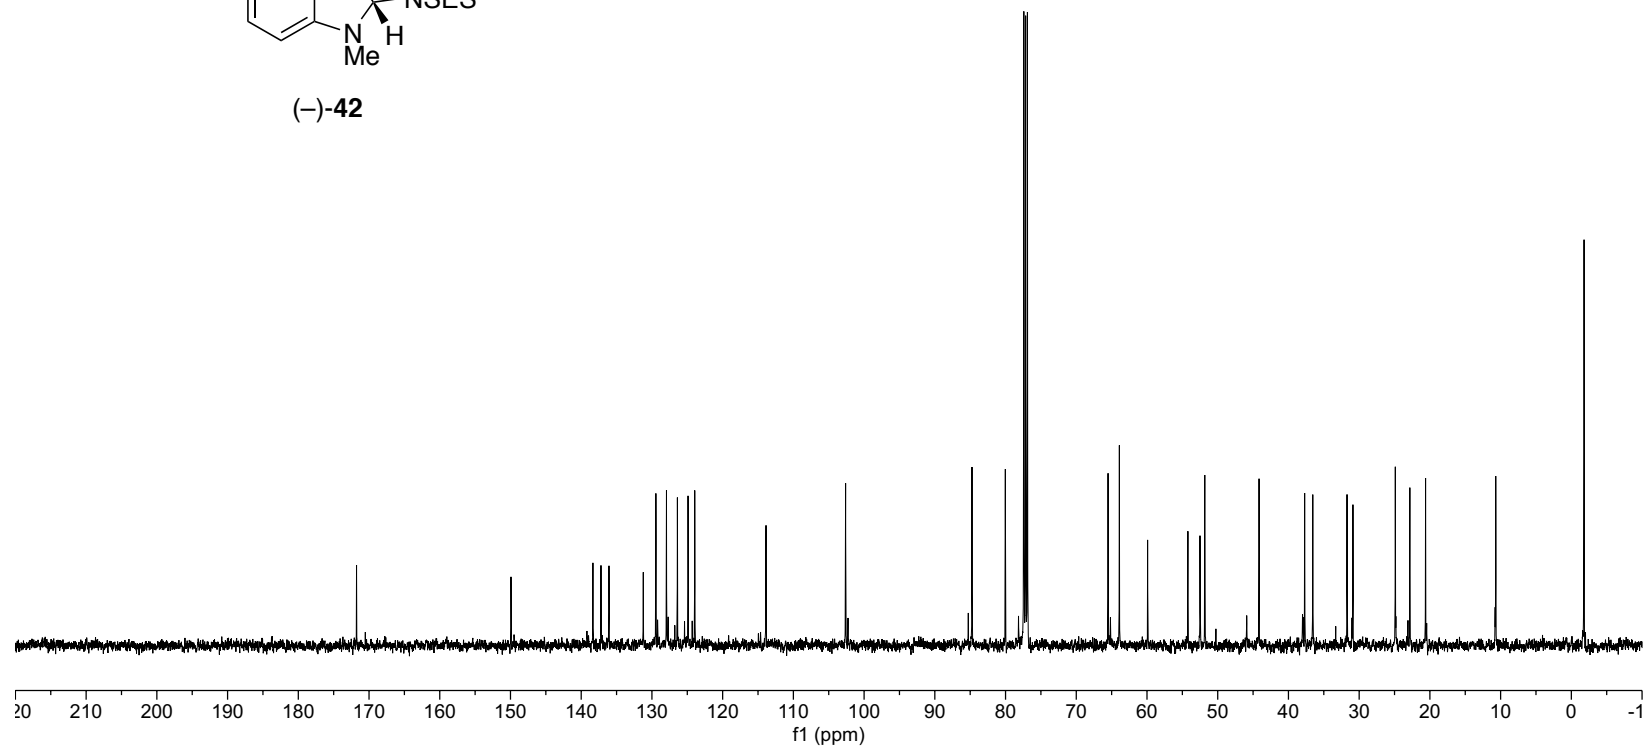

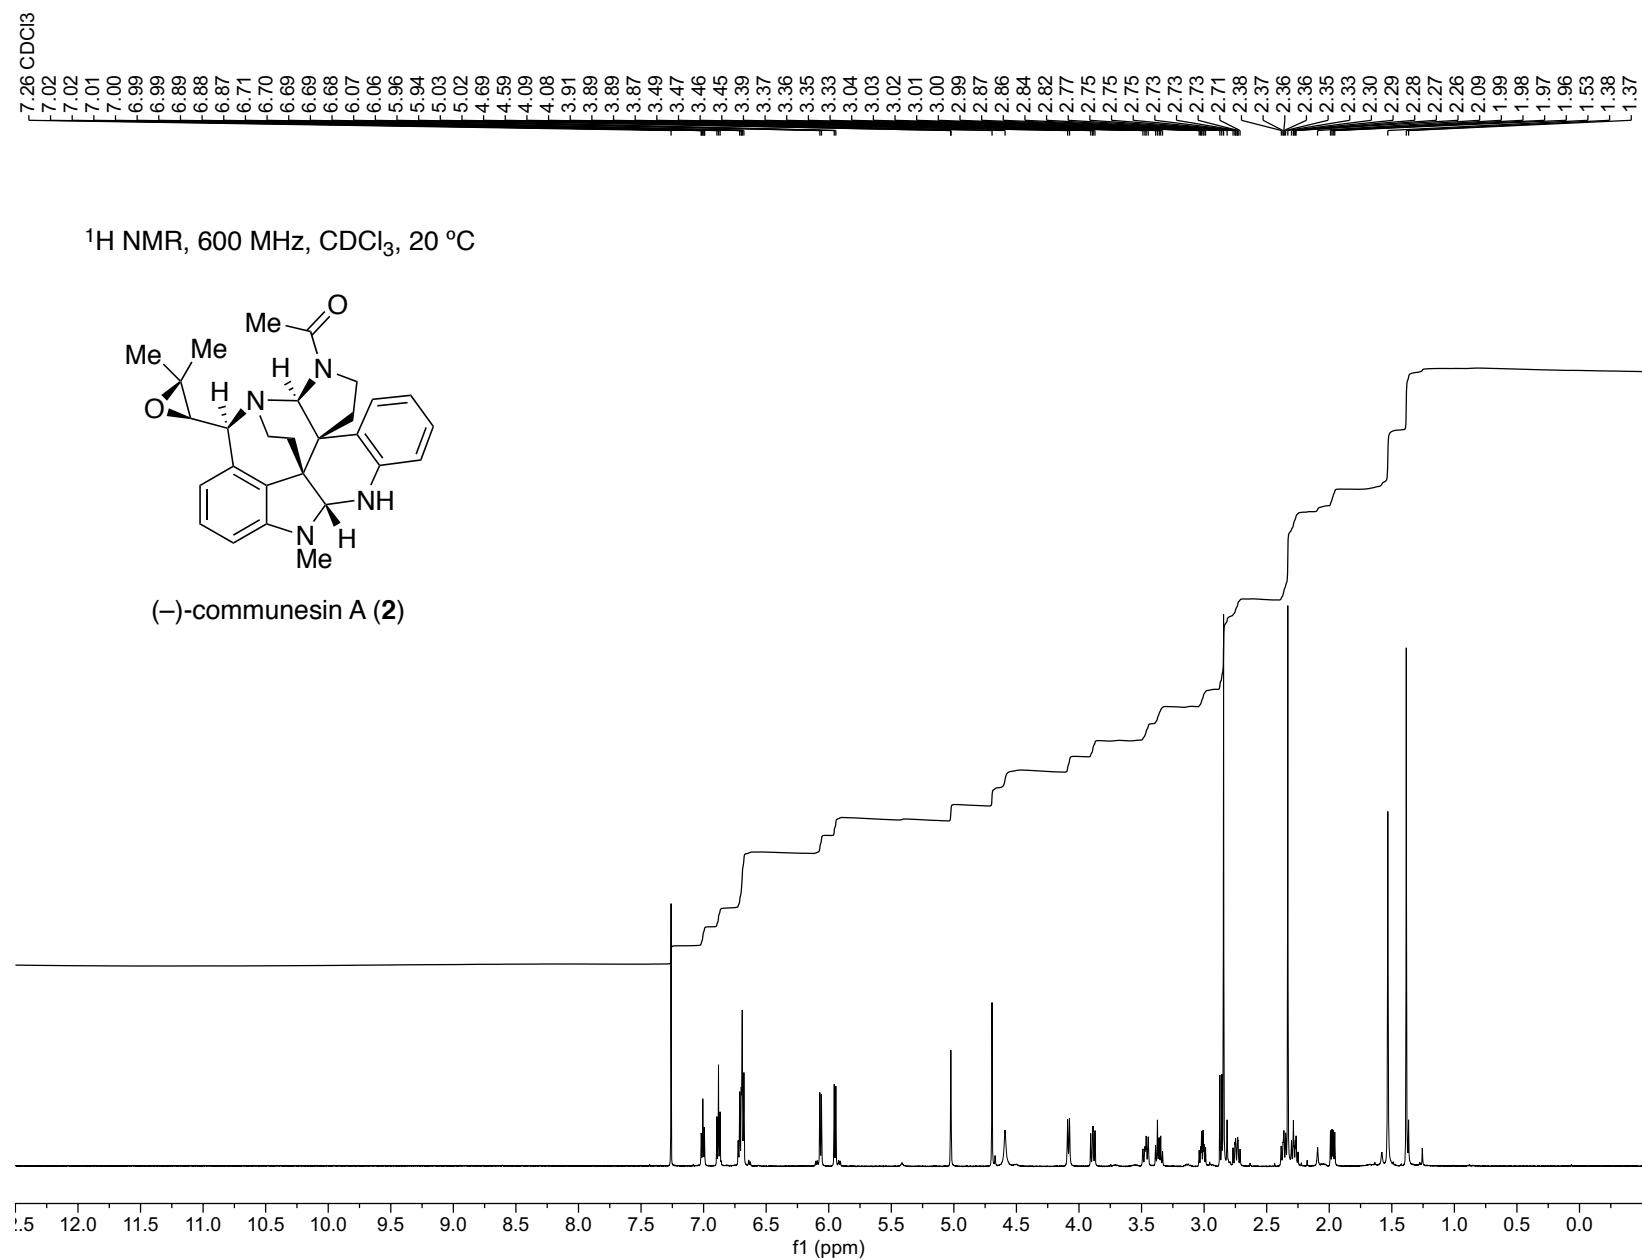

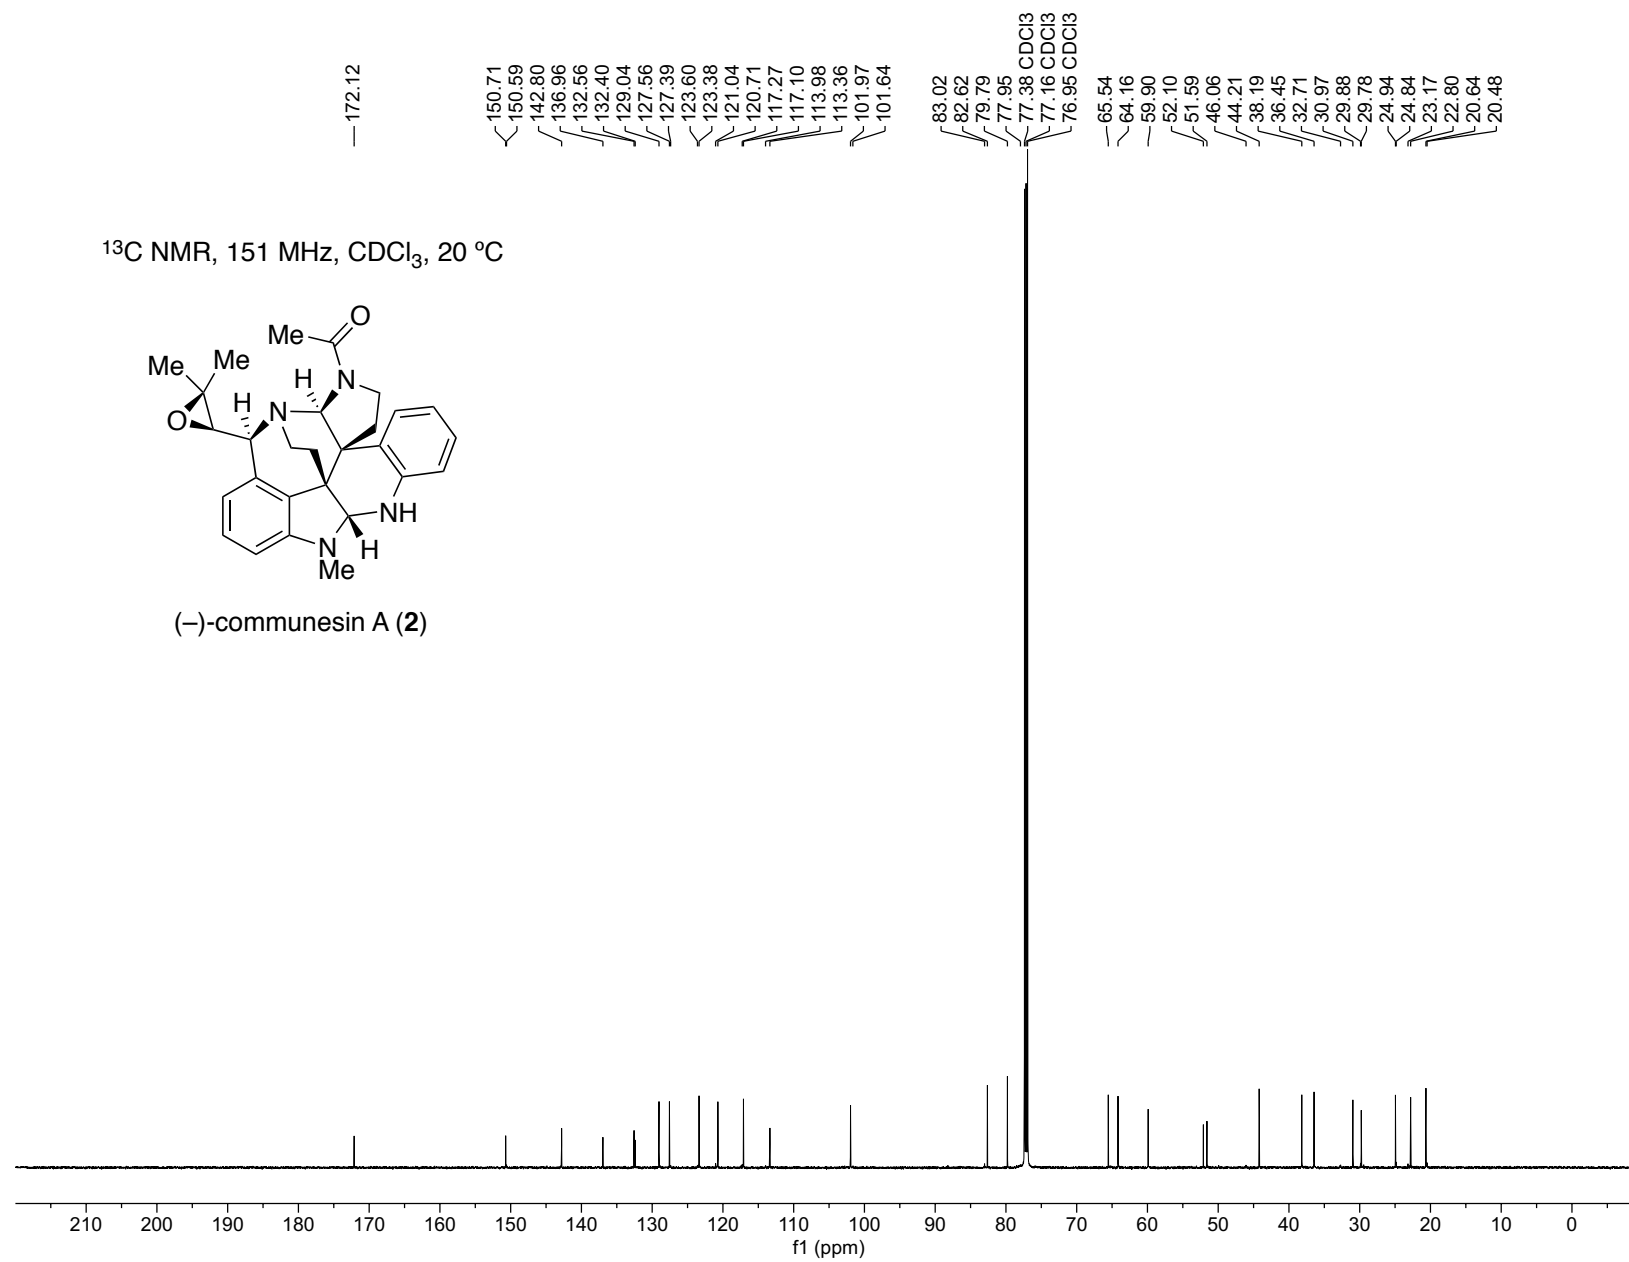

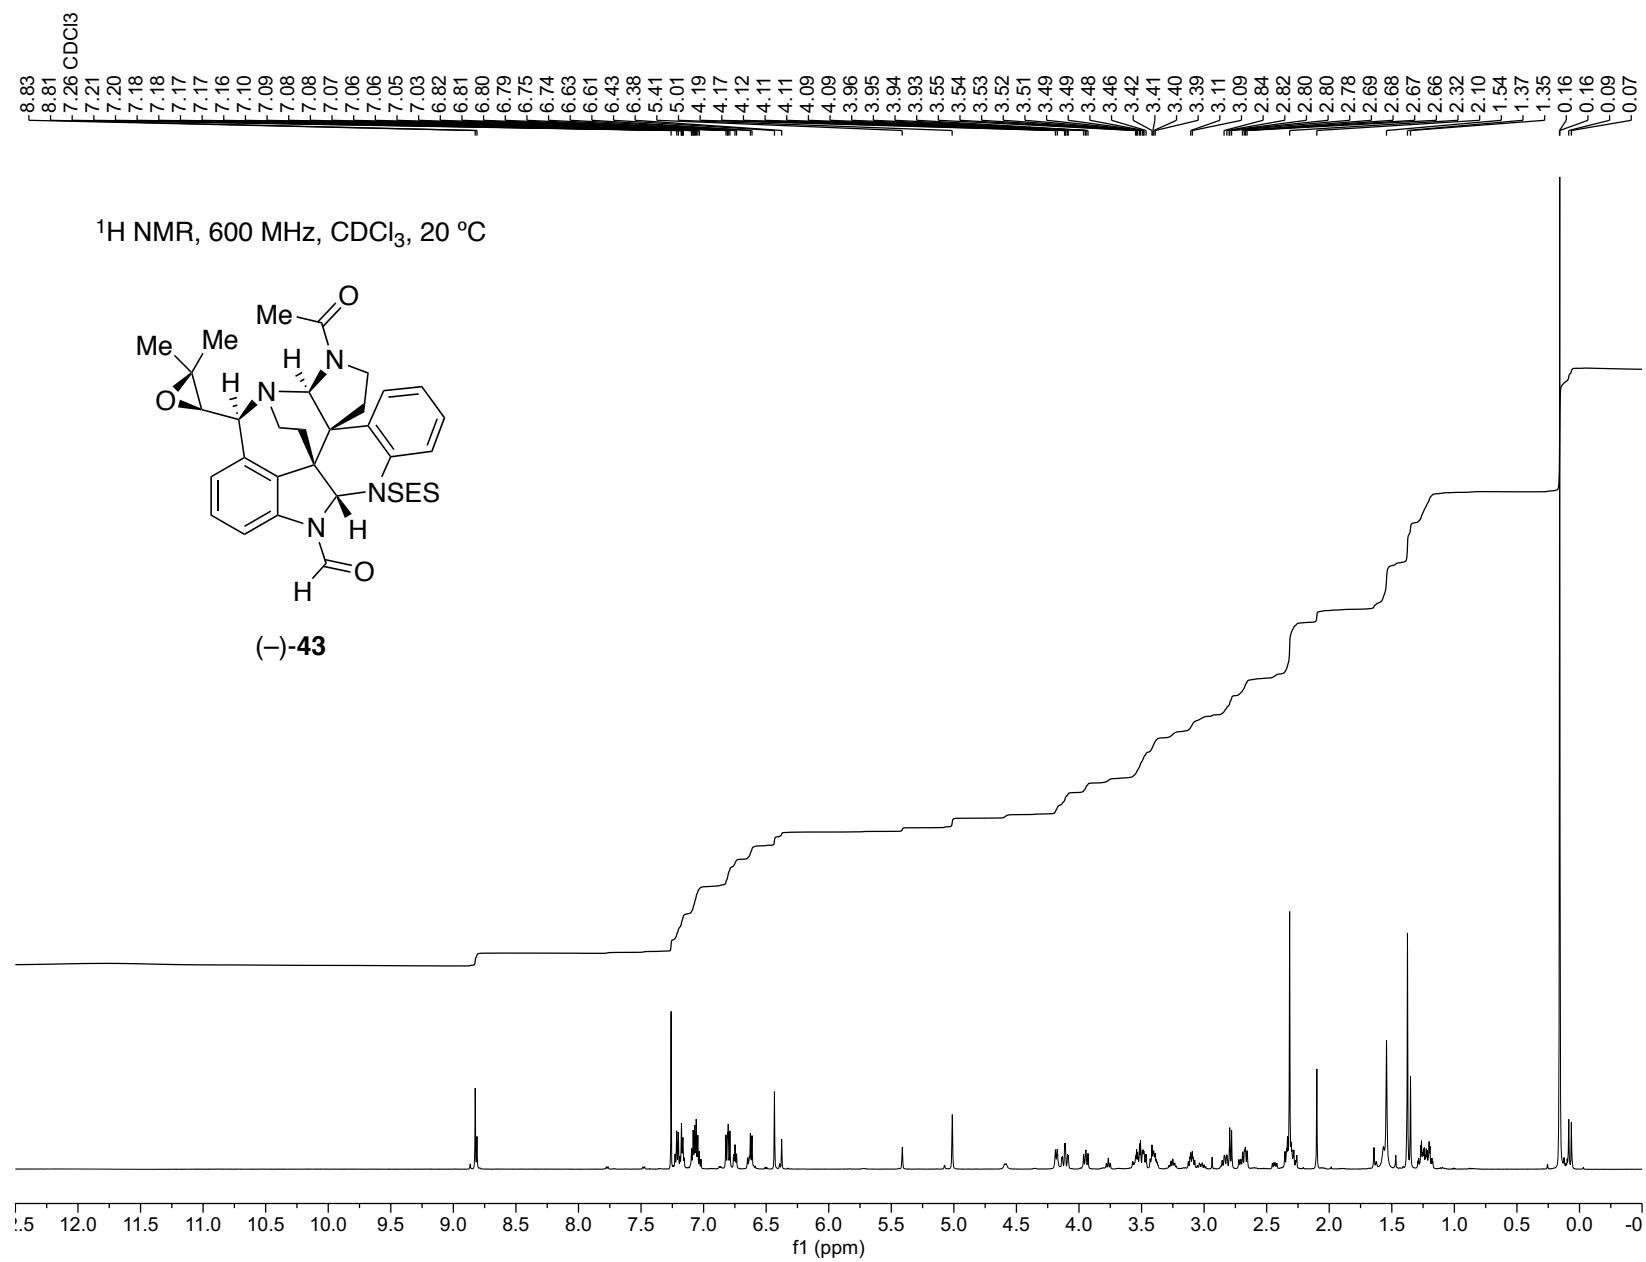

$^{13}\text{C}$  NMR, 151 MHz,  $\text{CDCl}_3$ , 20 °C

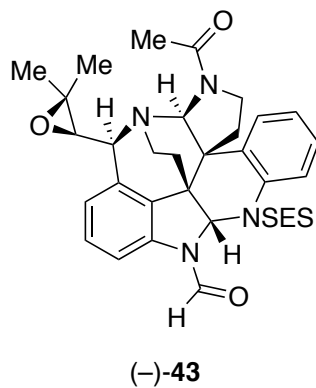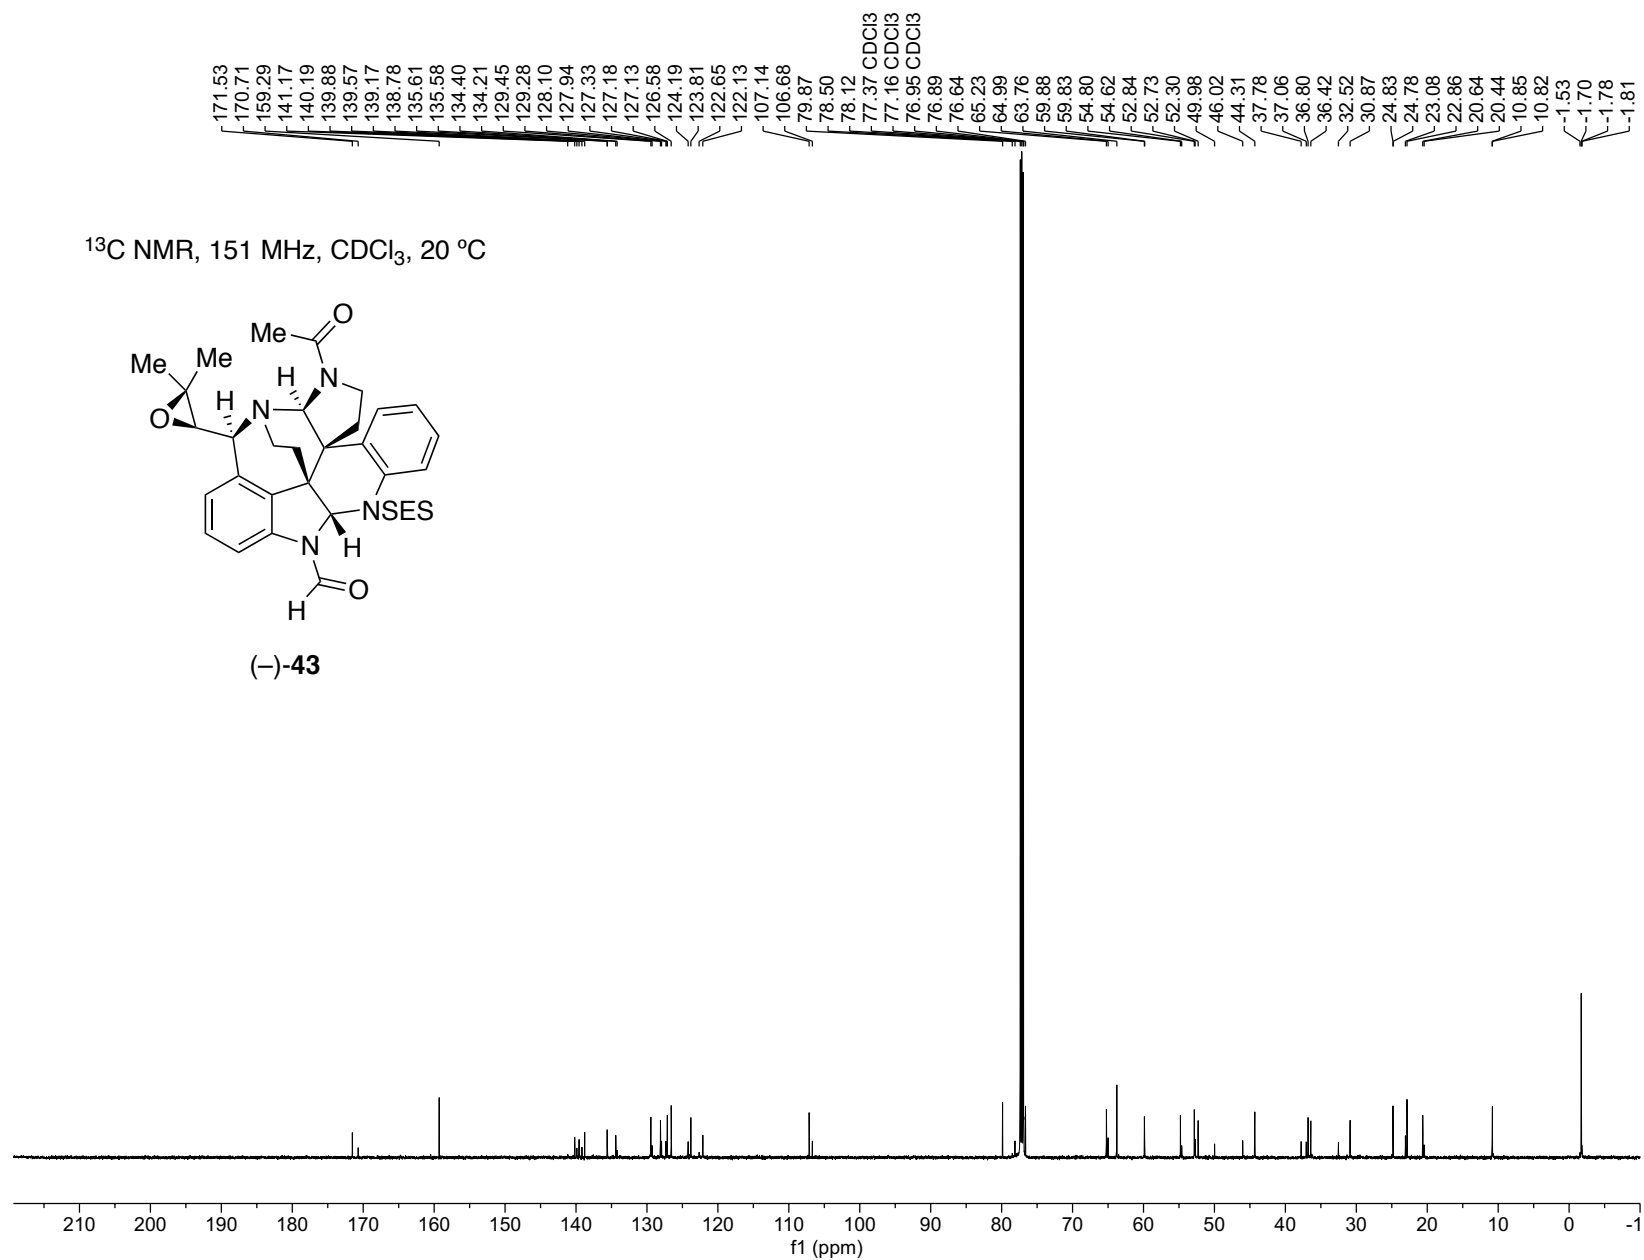

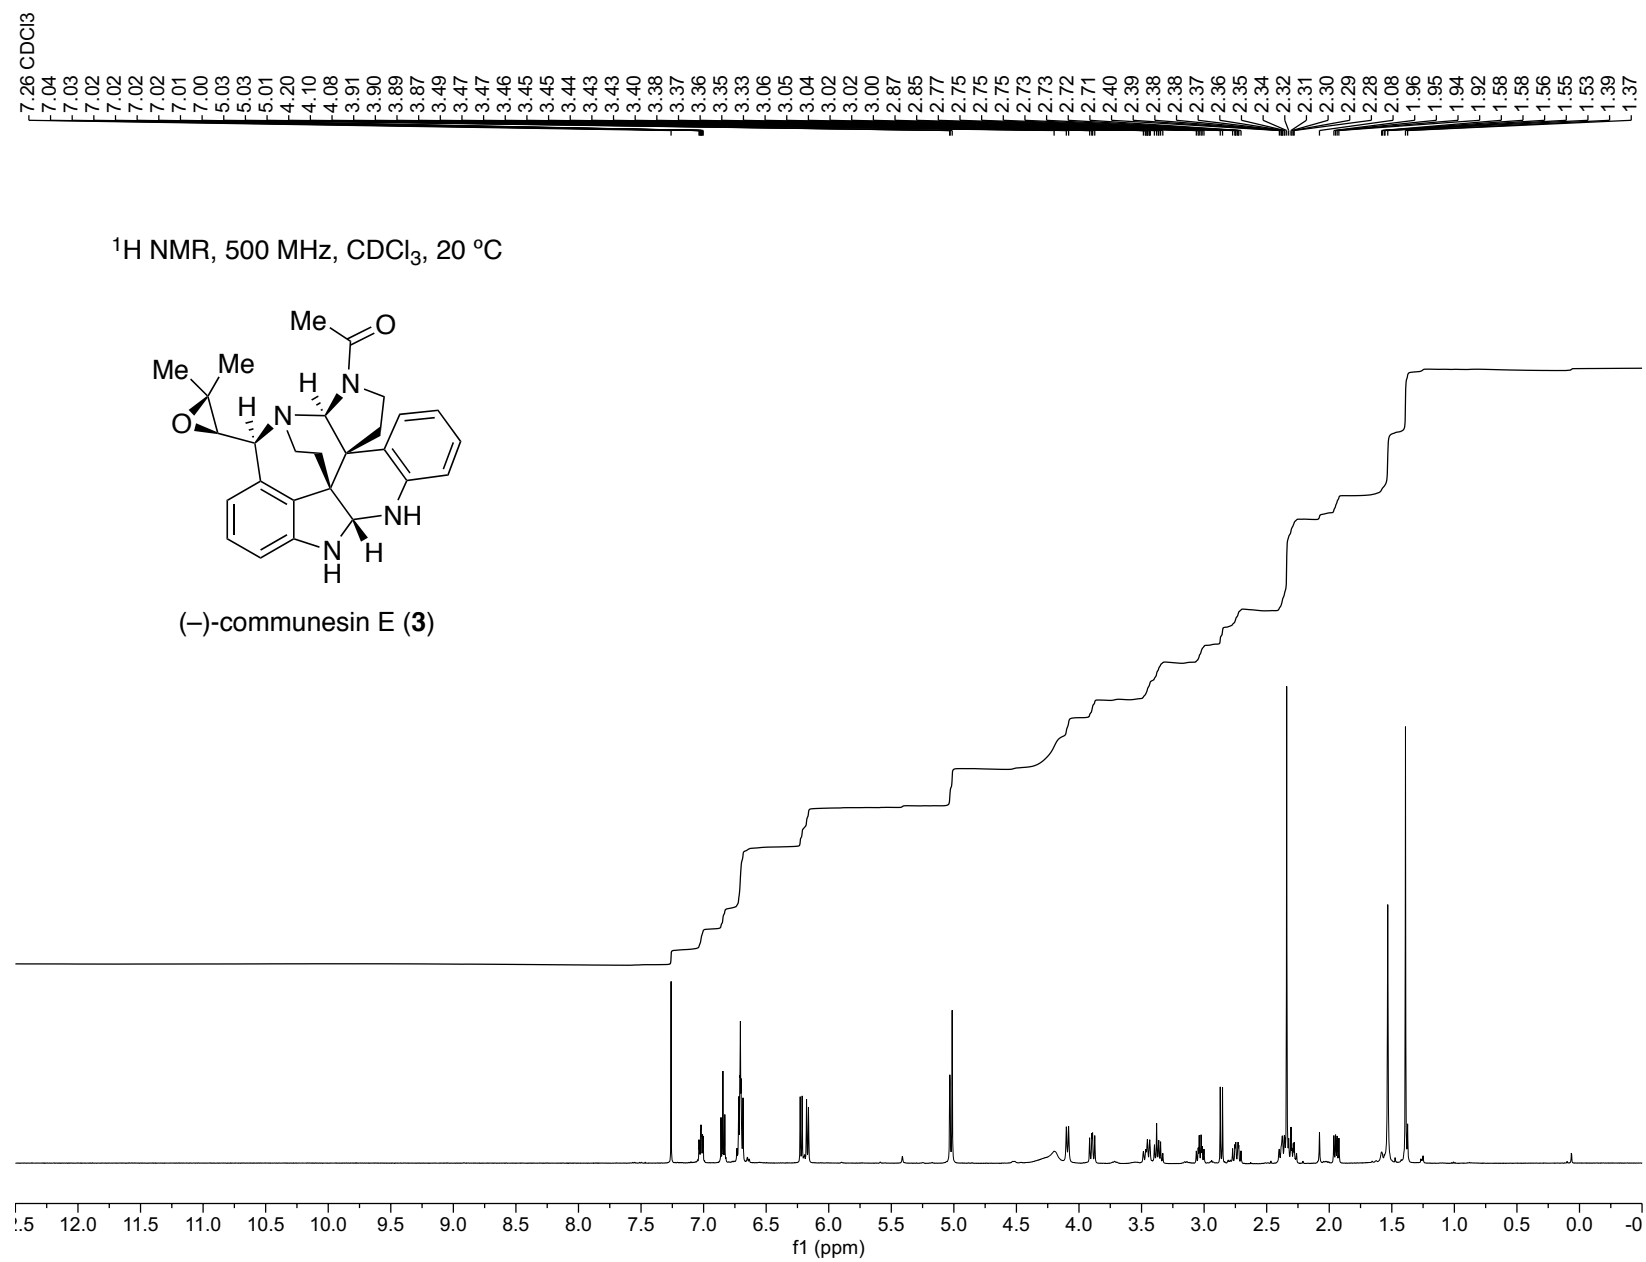

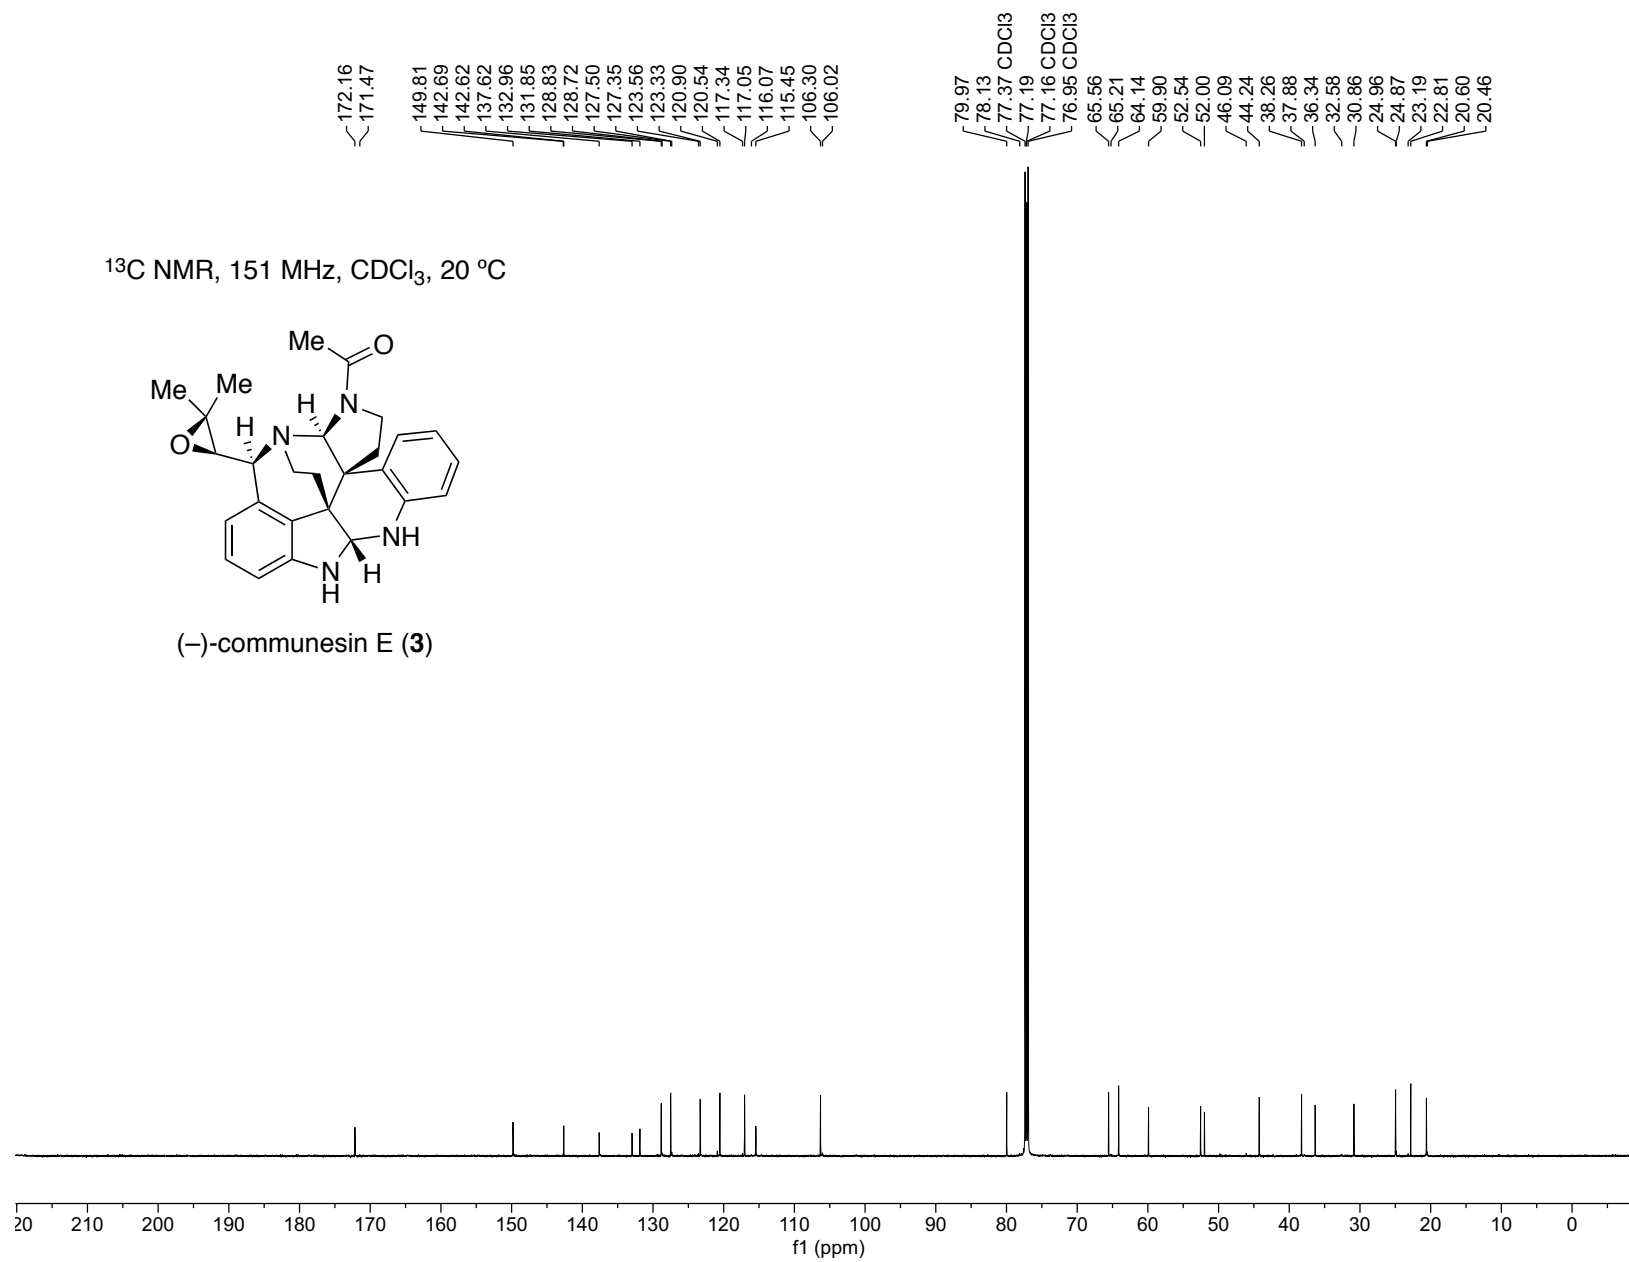



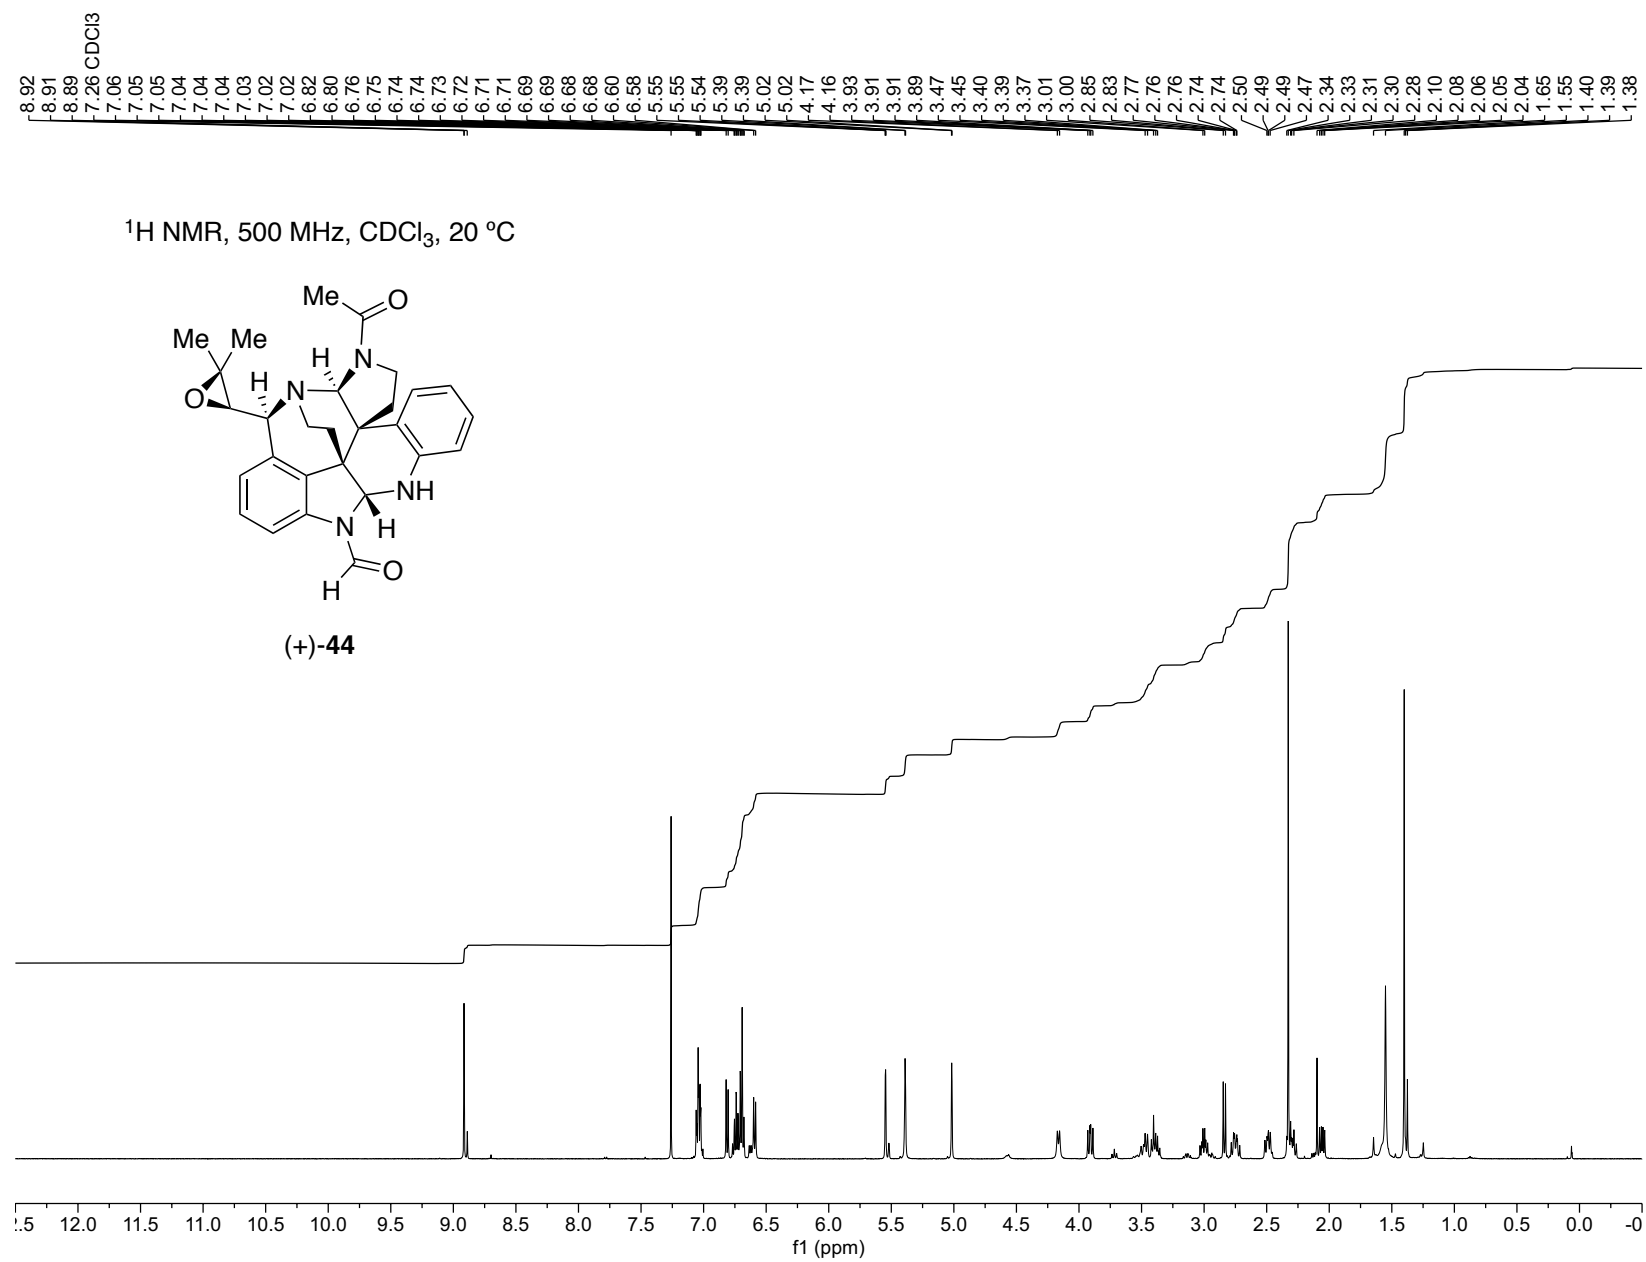

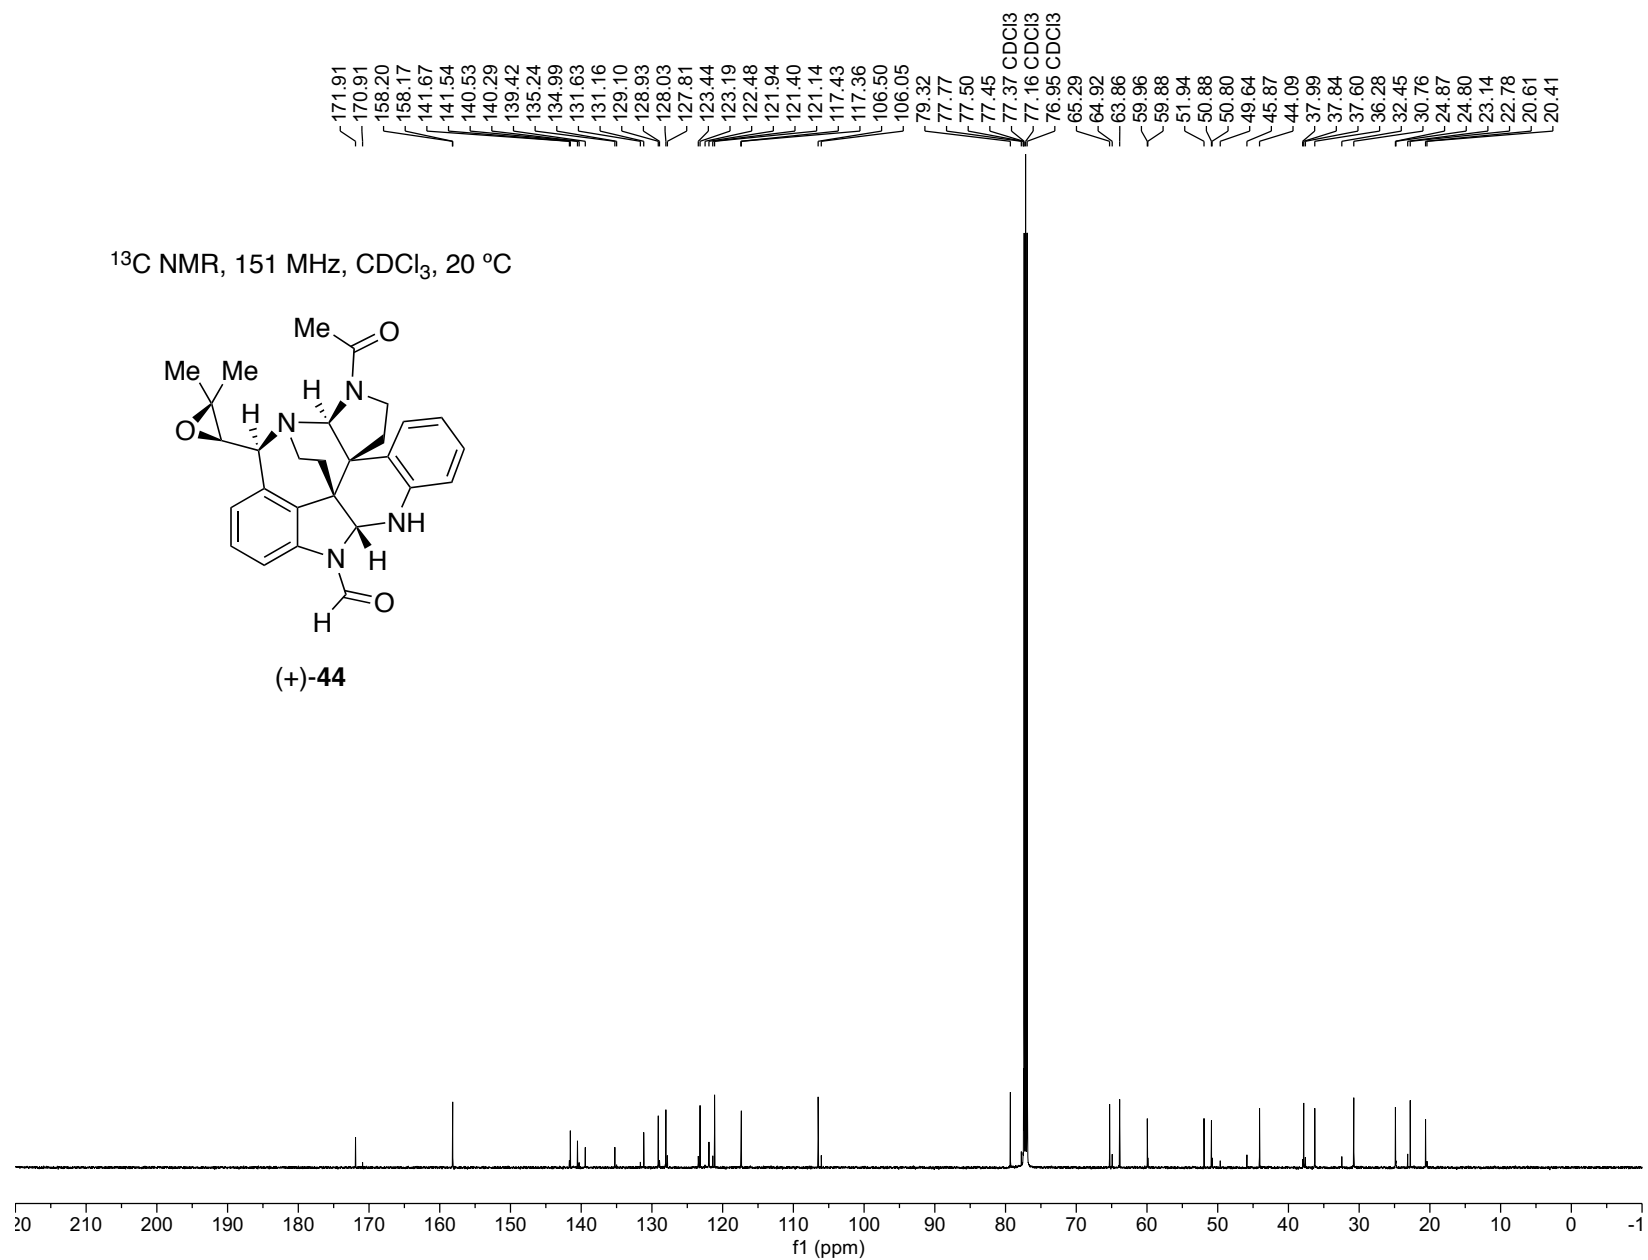

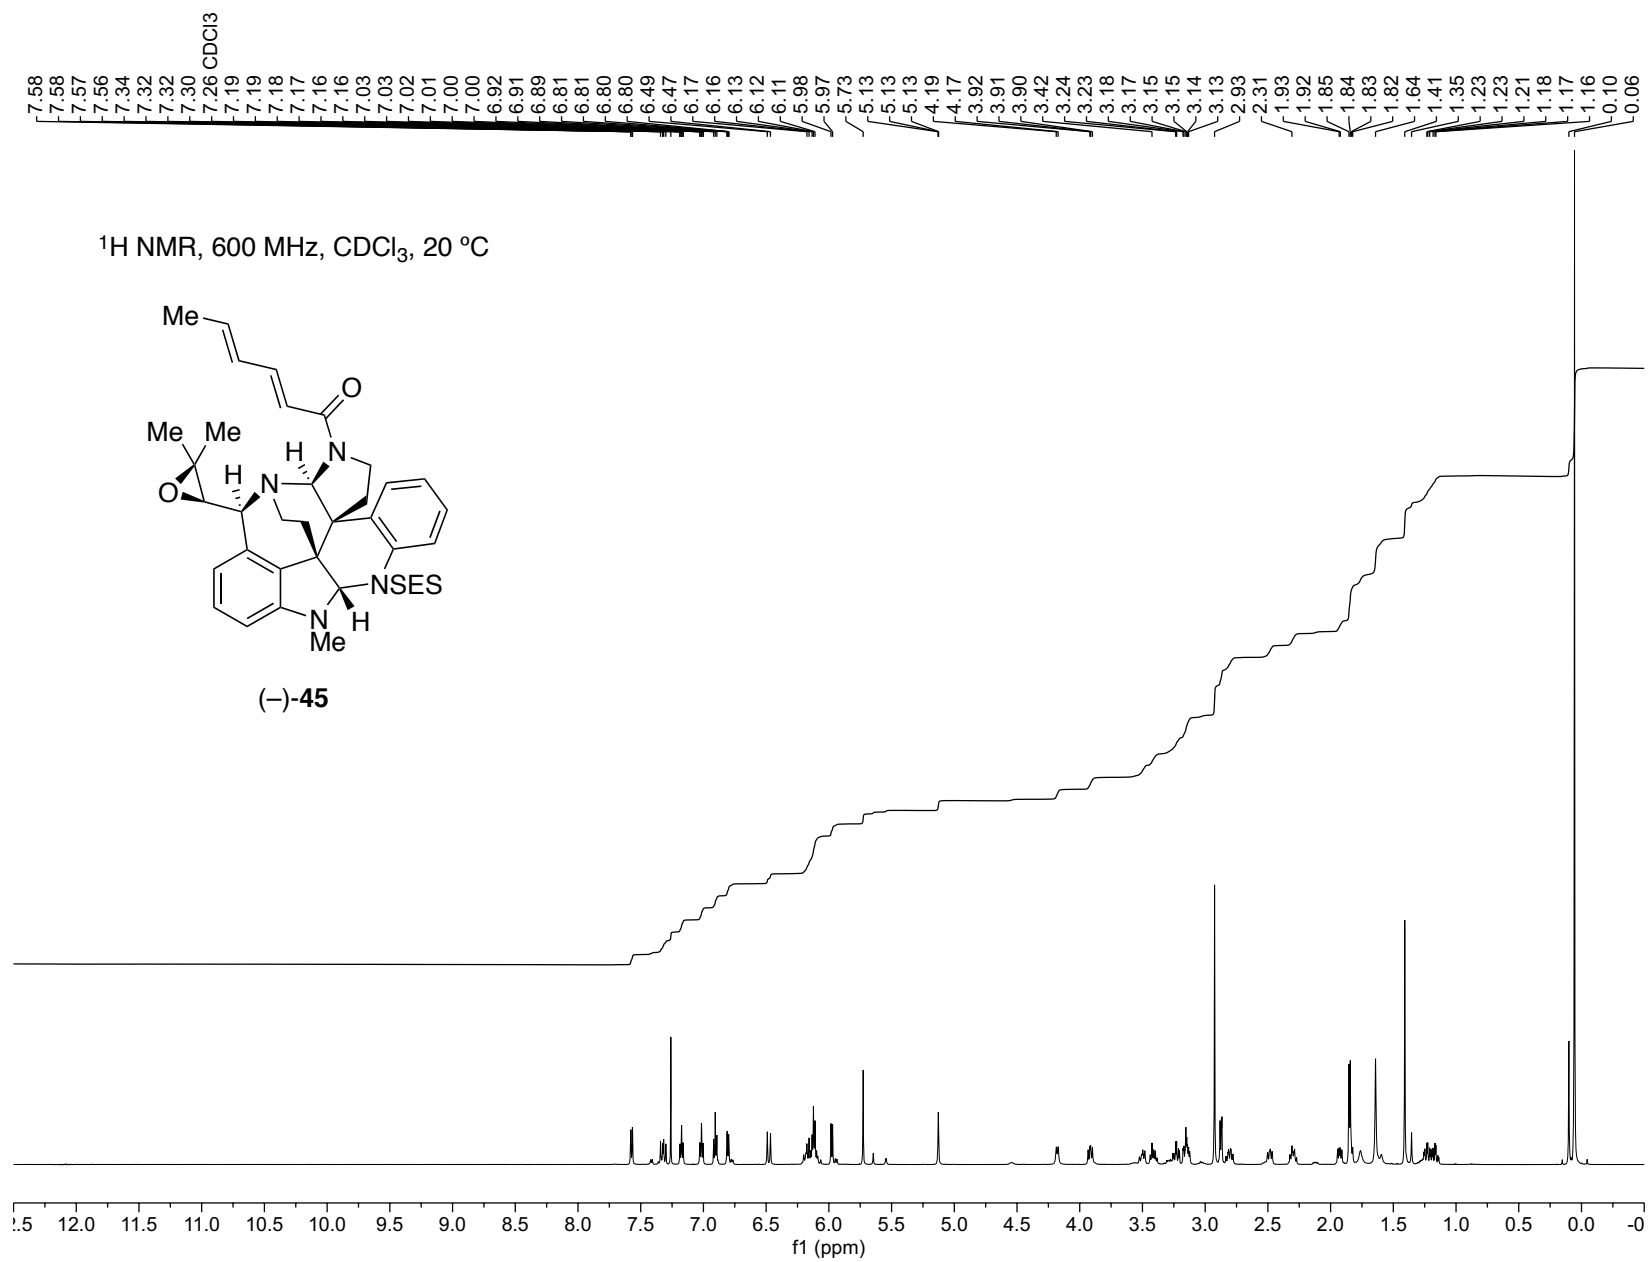

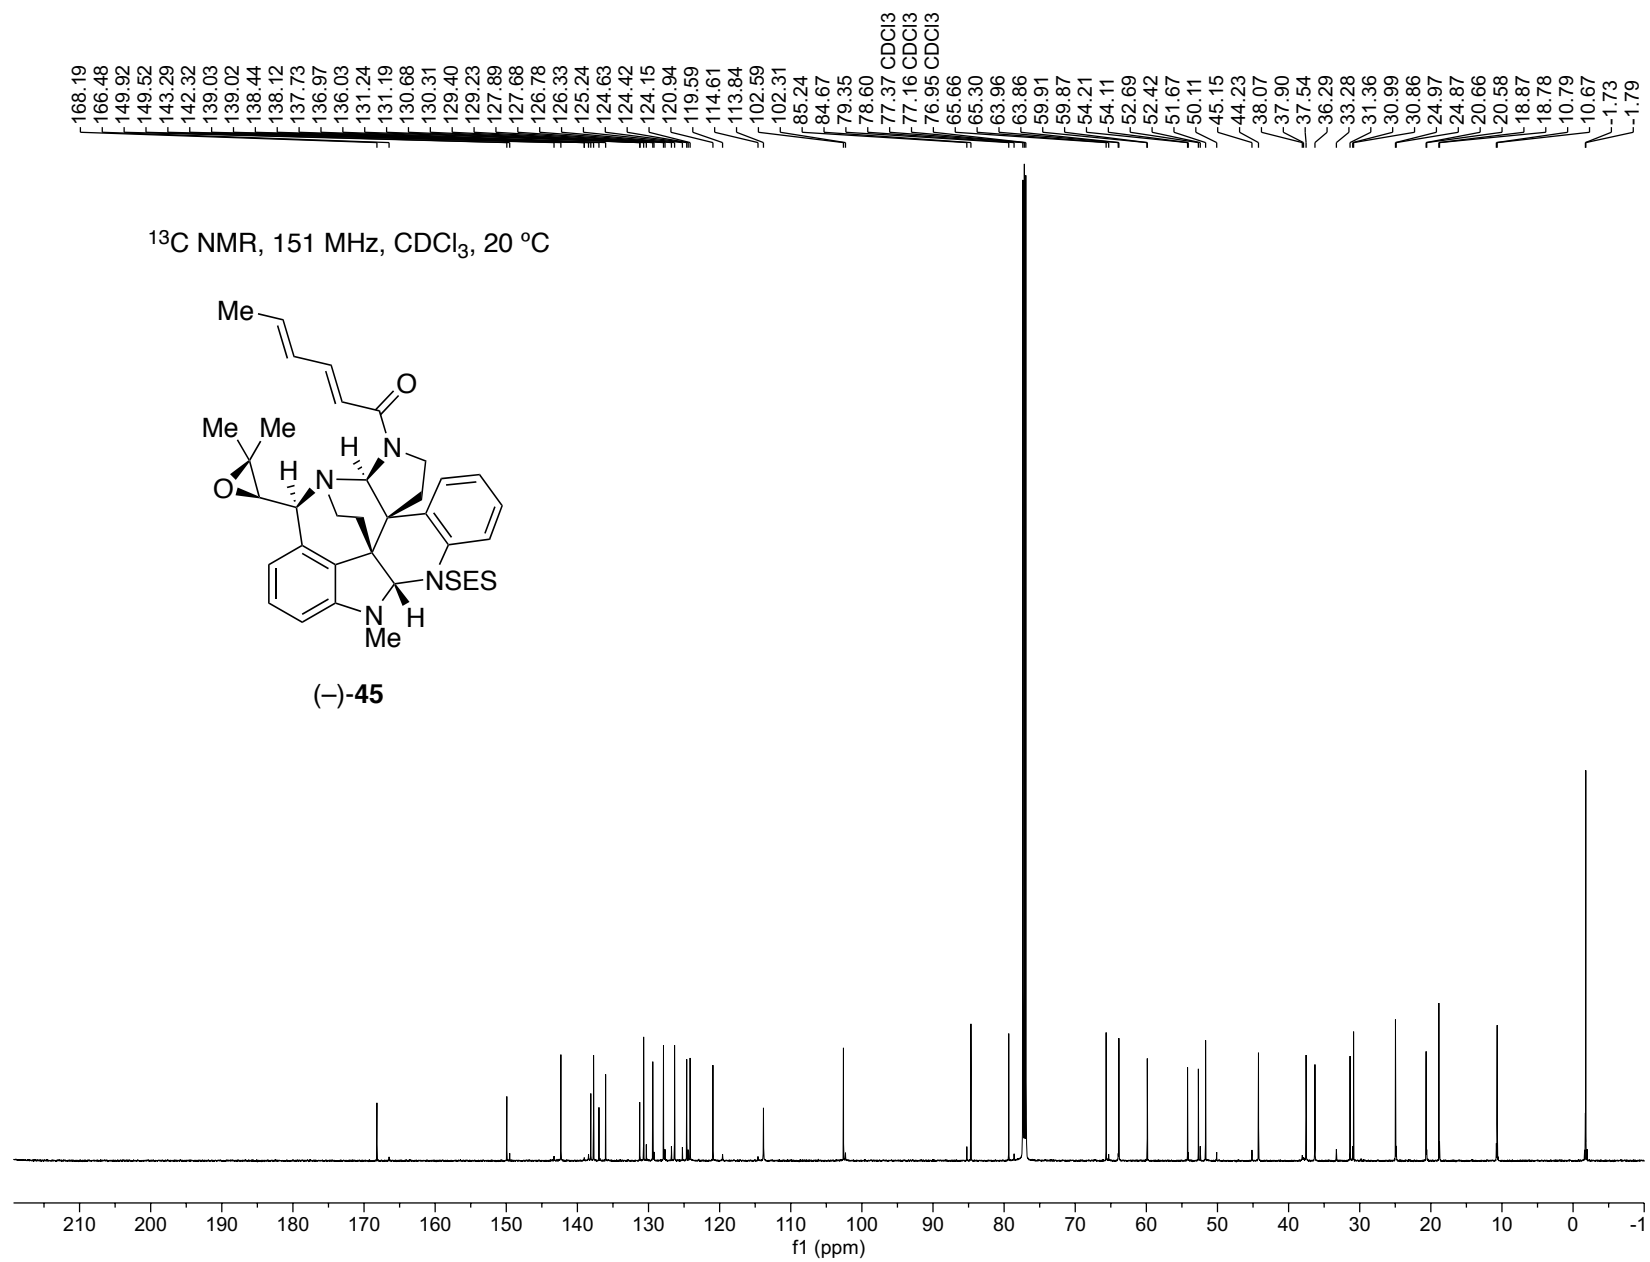

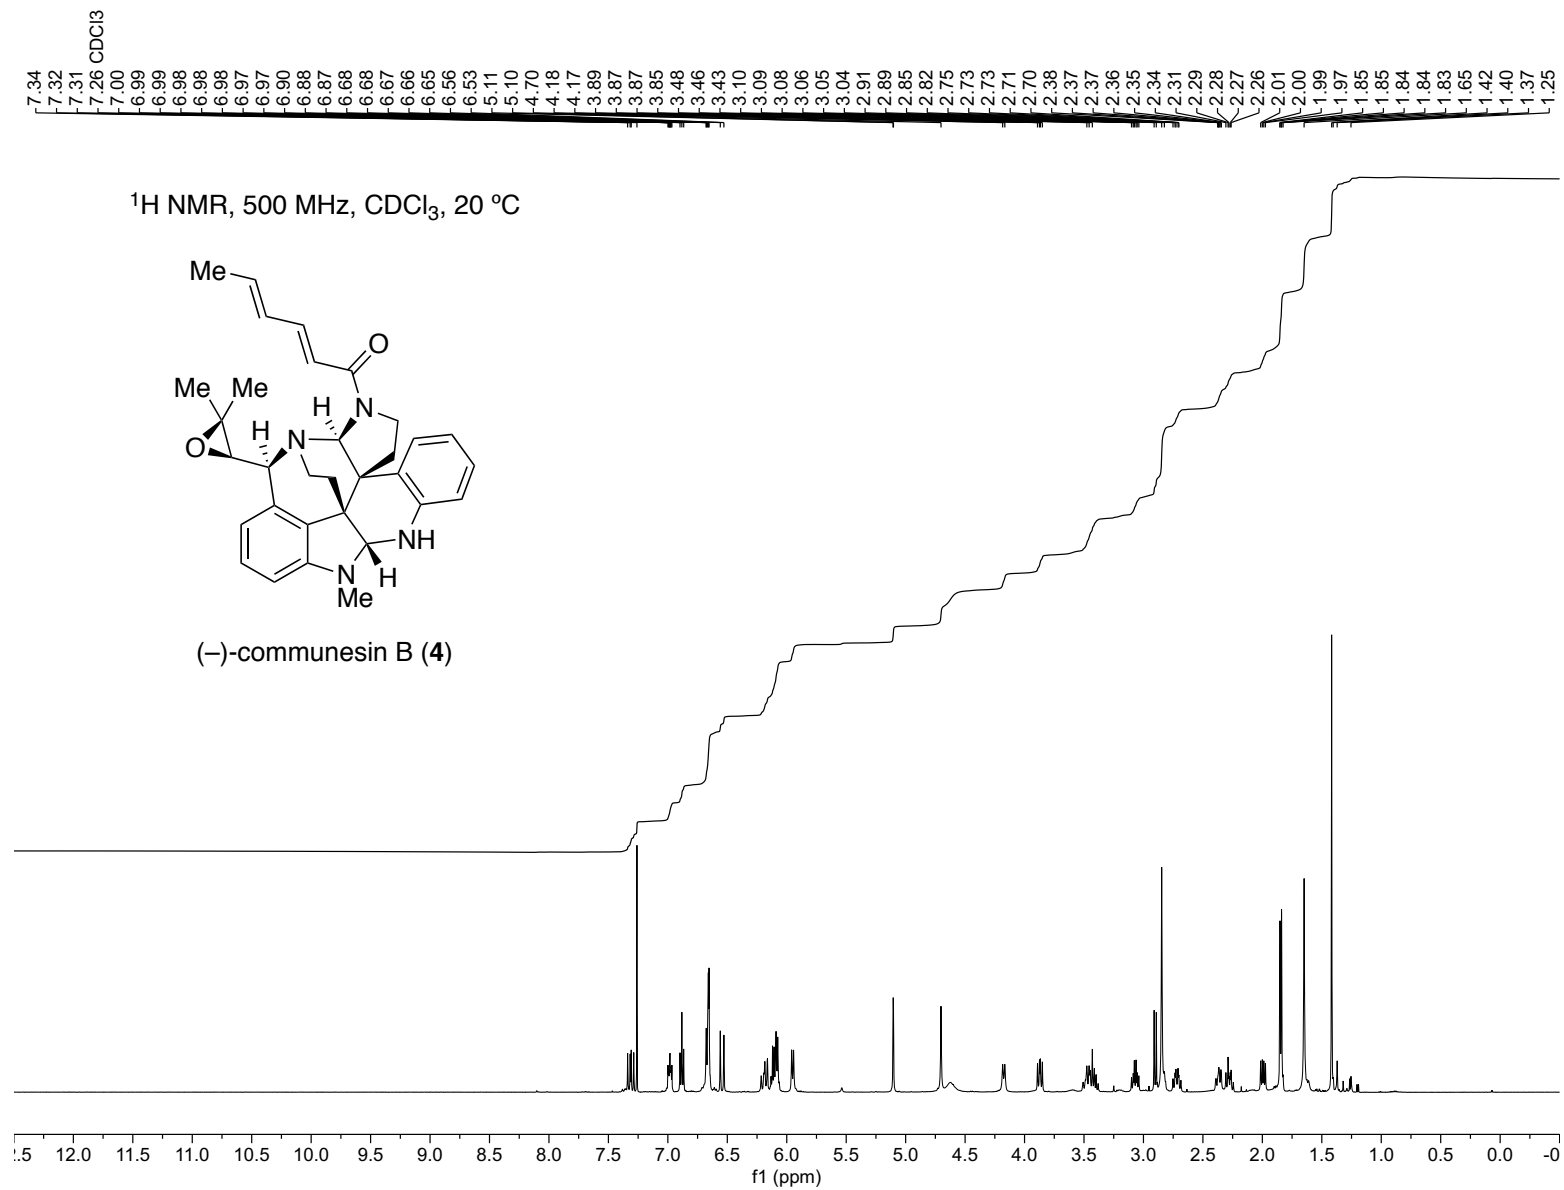

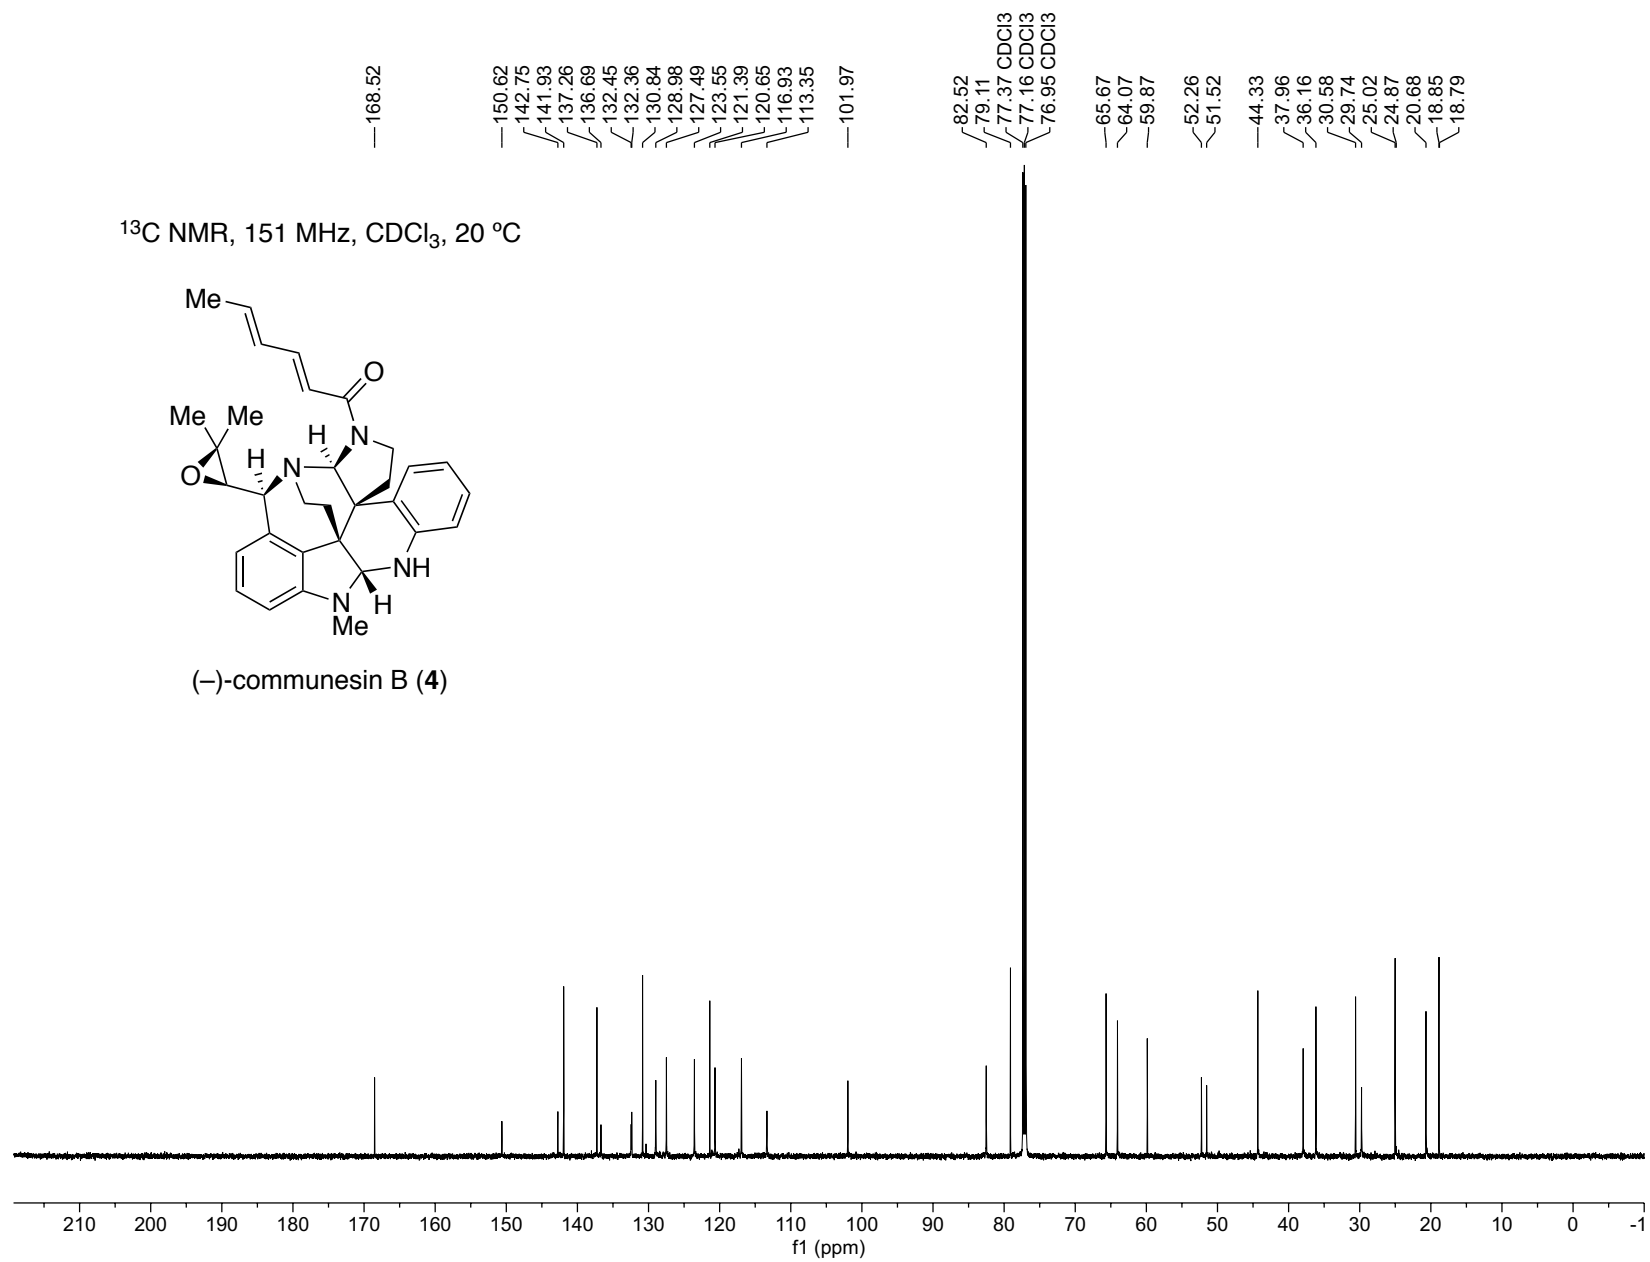

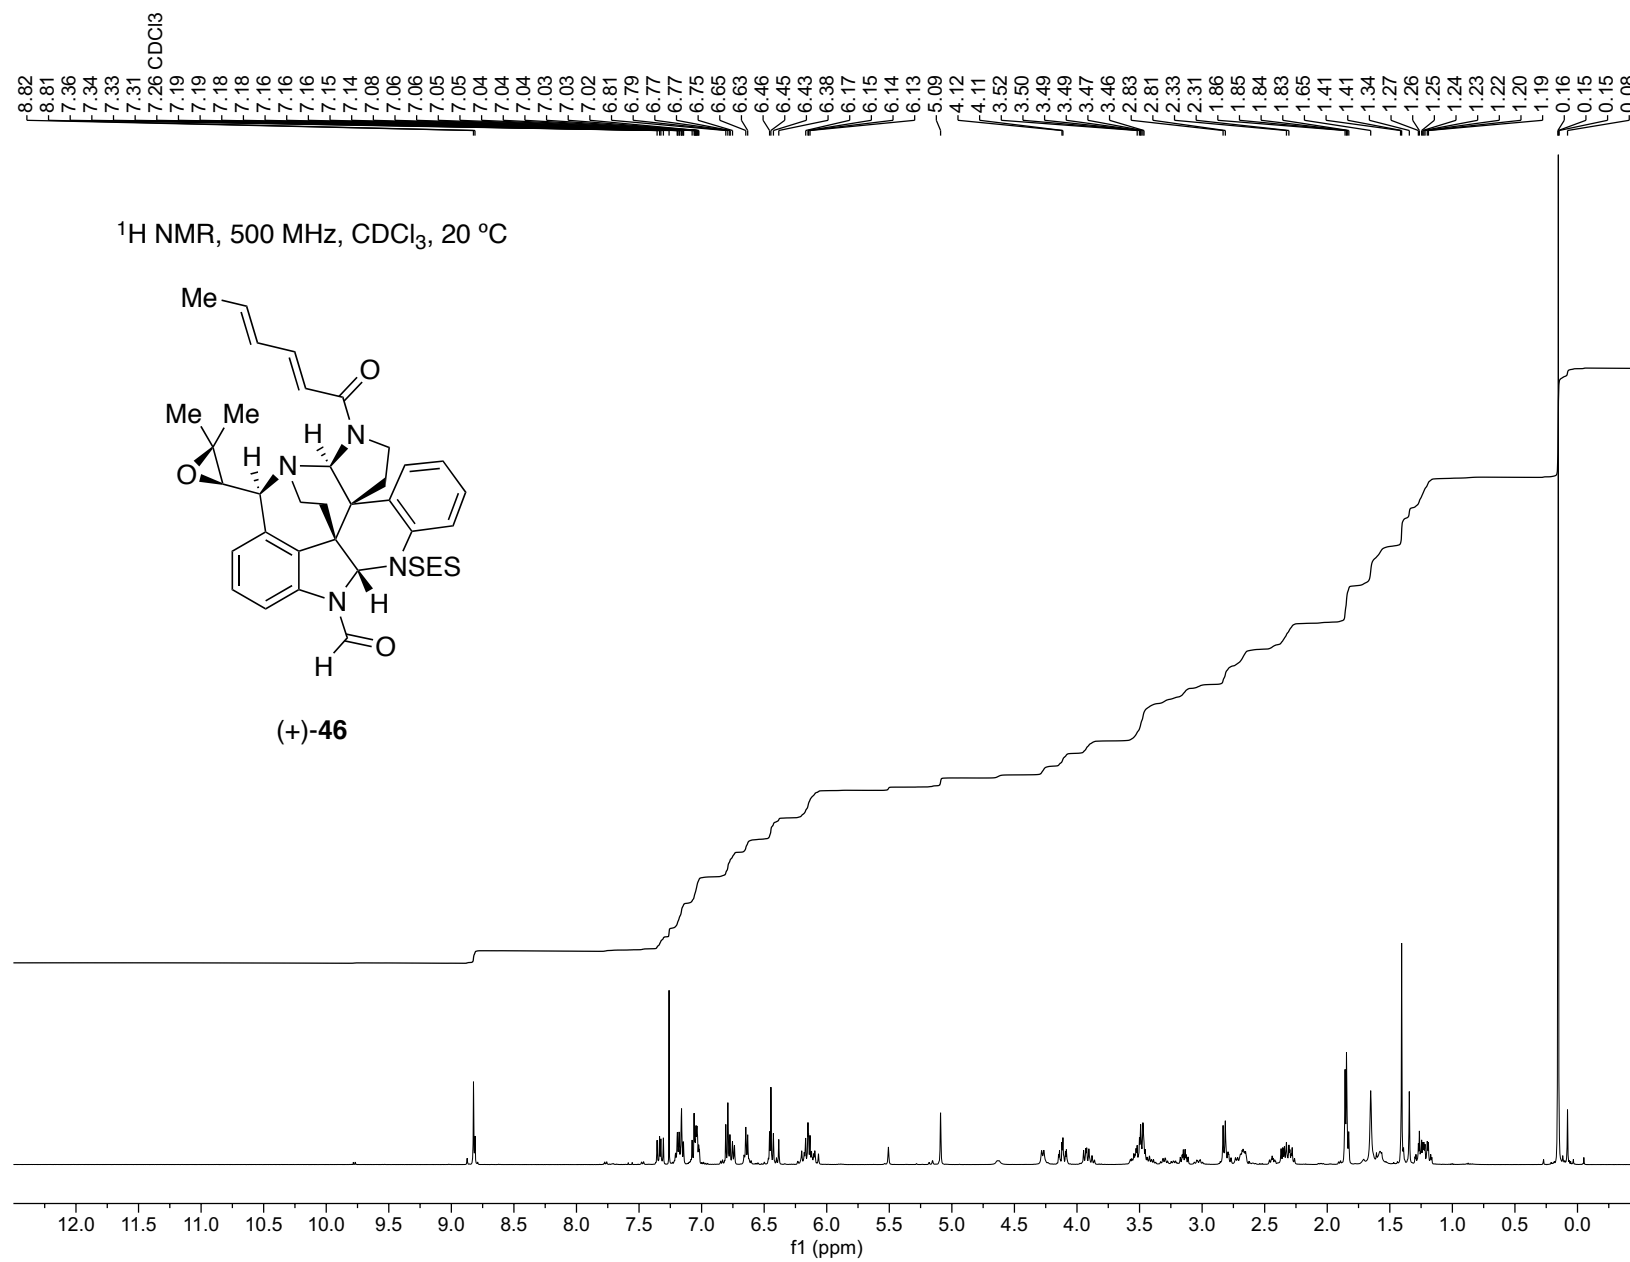

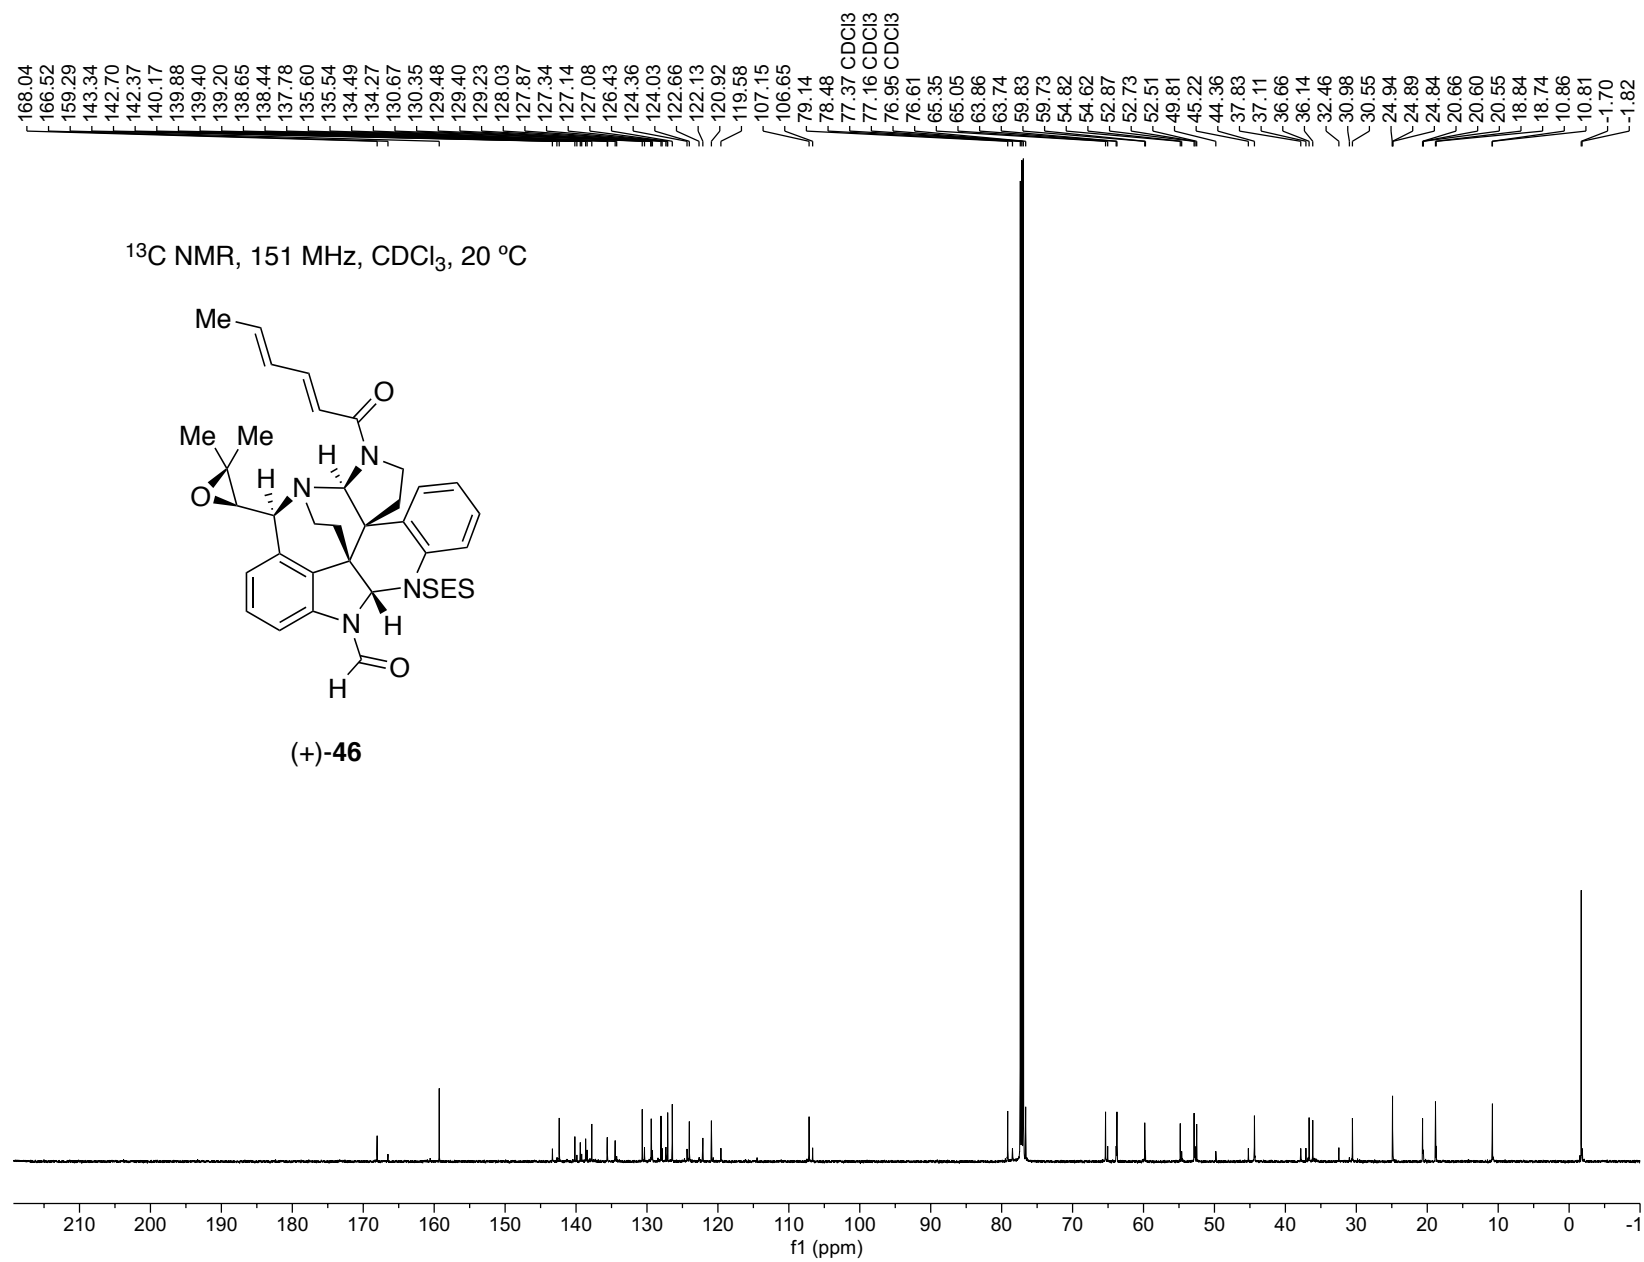



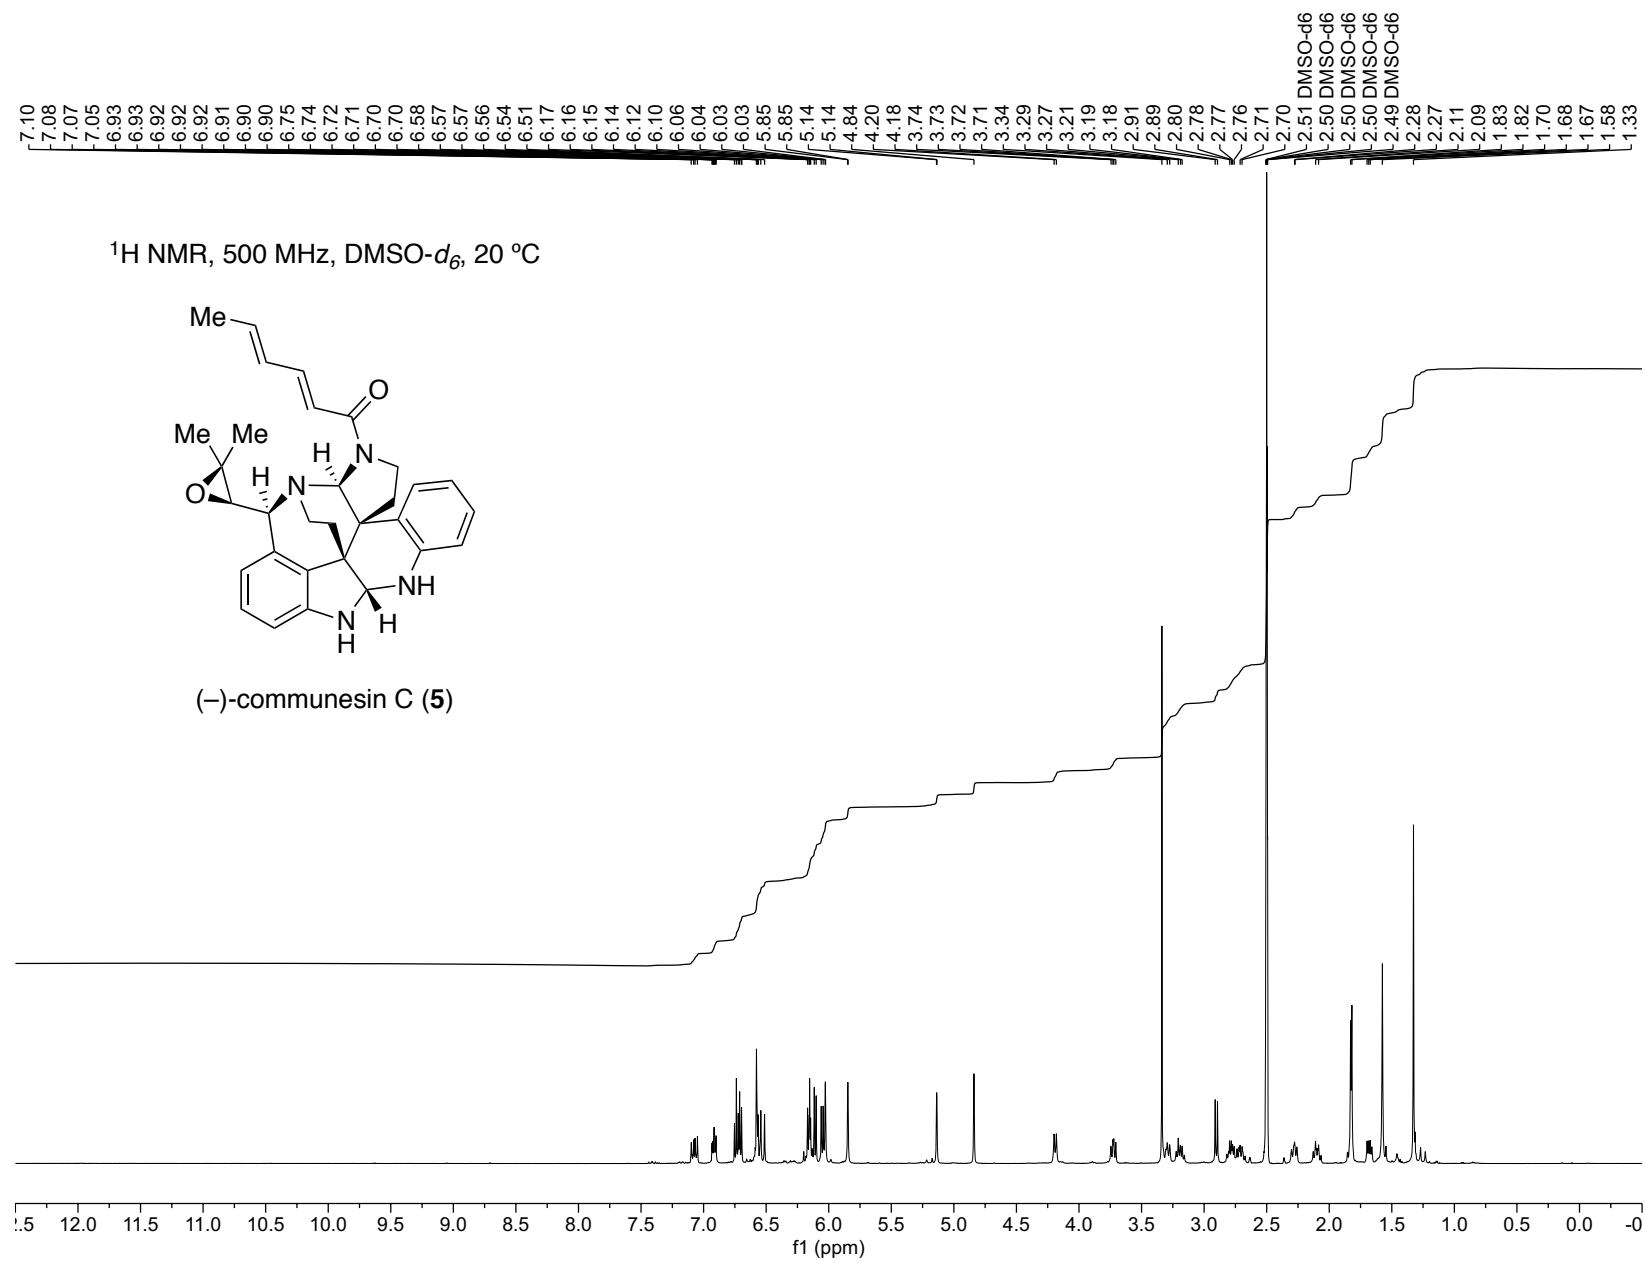

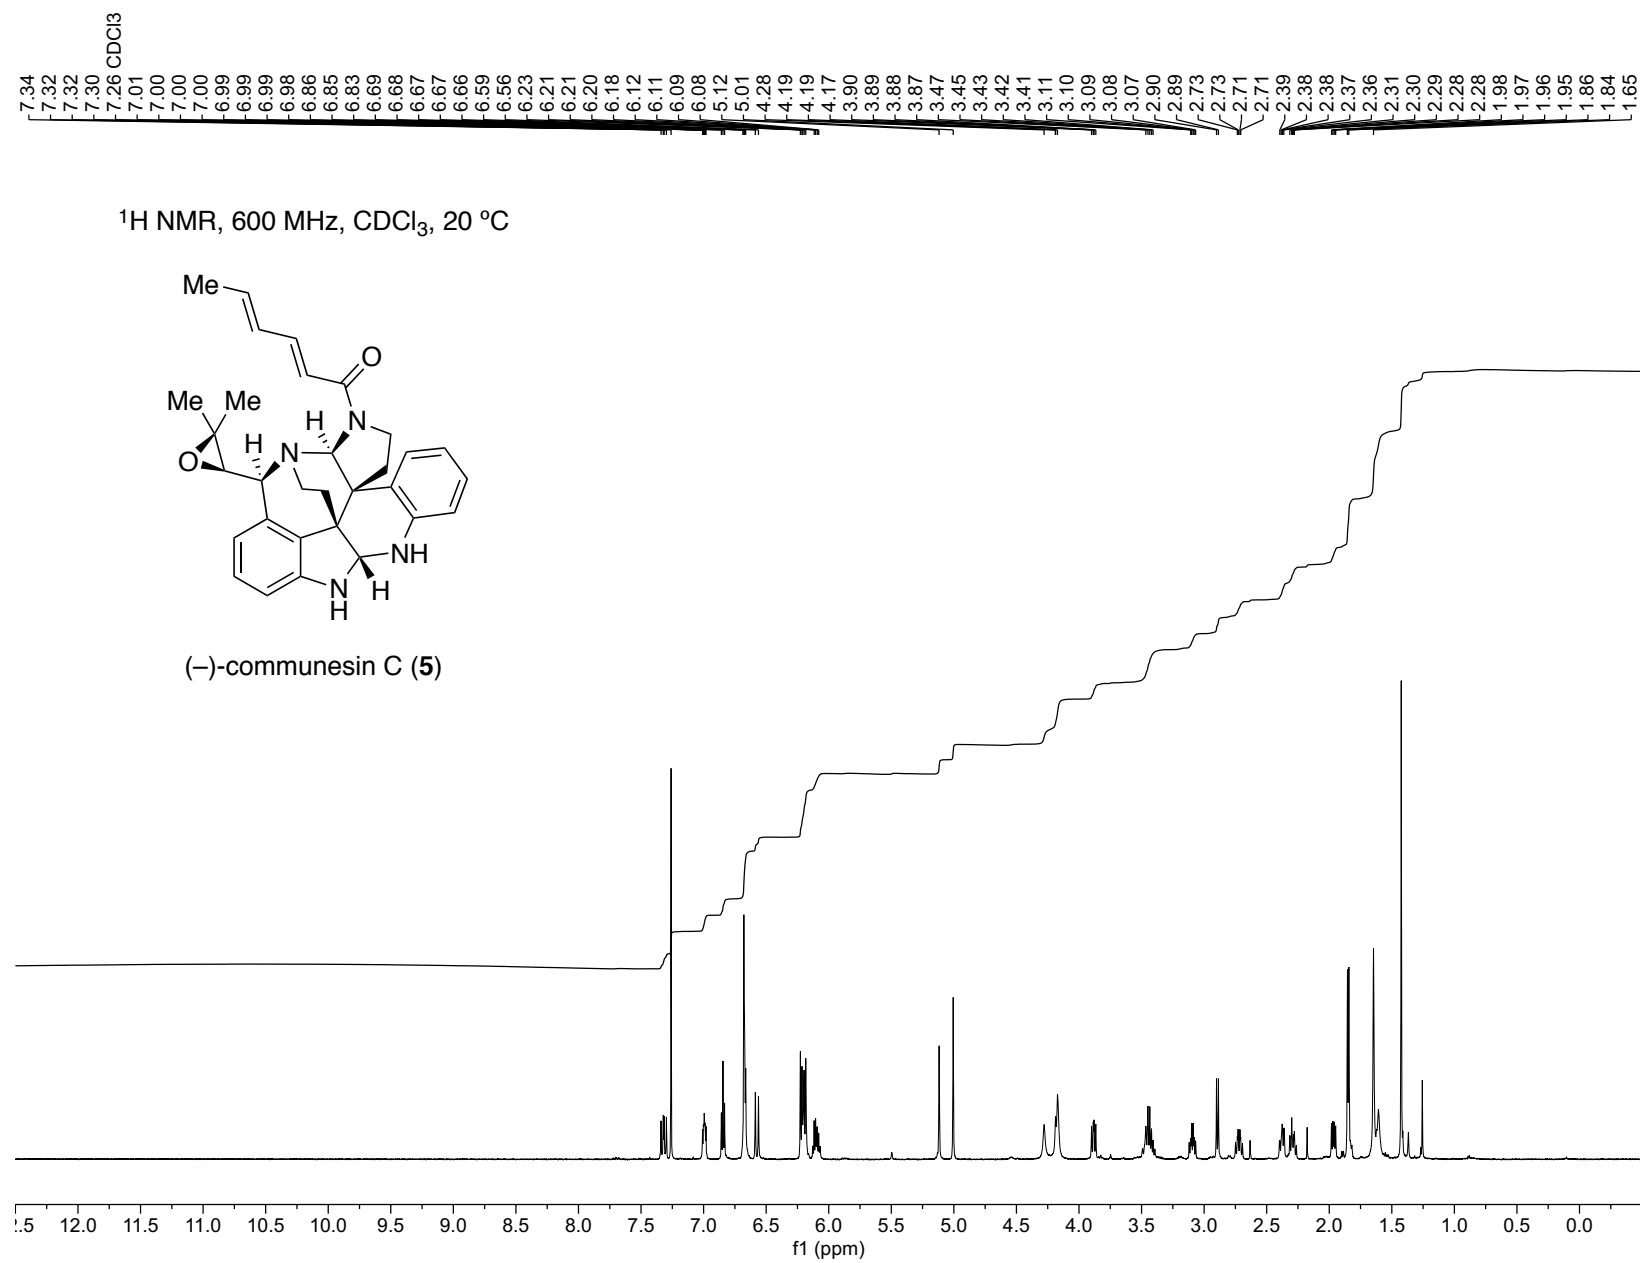

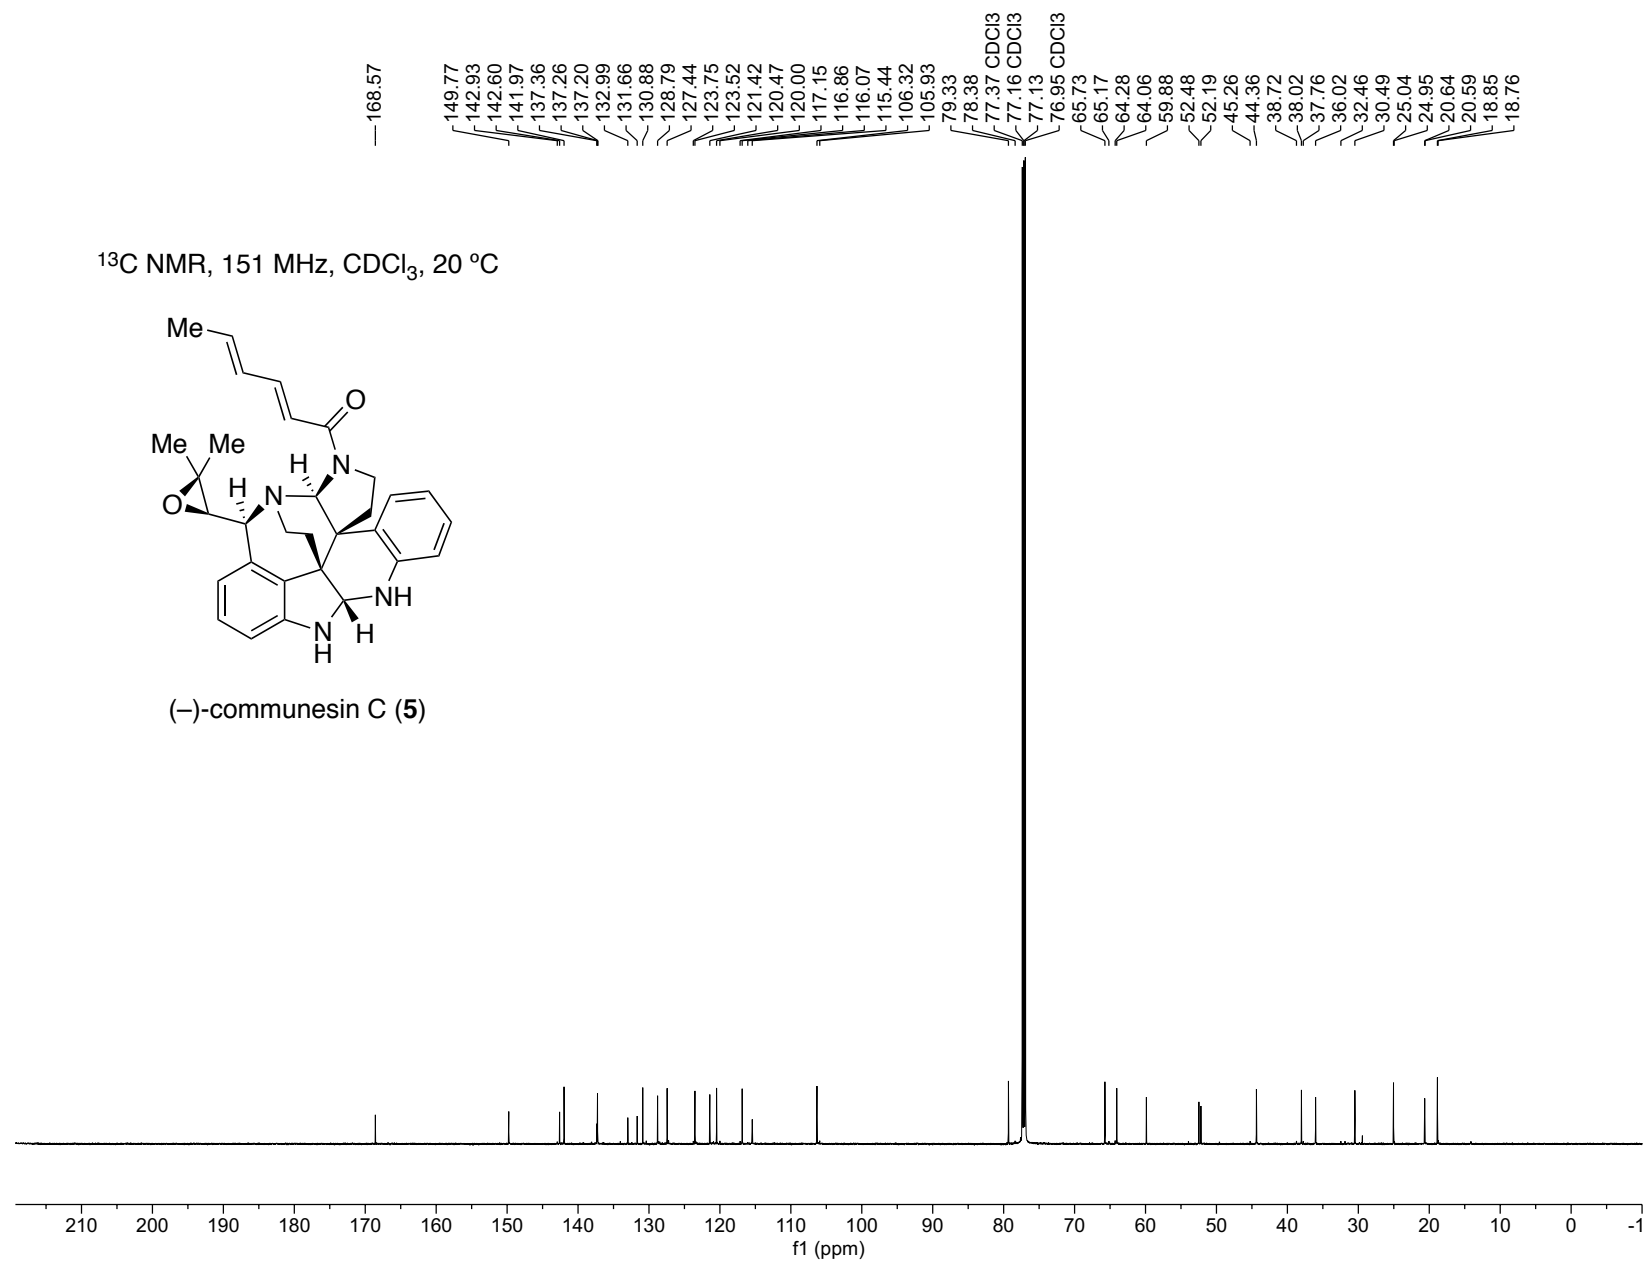

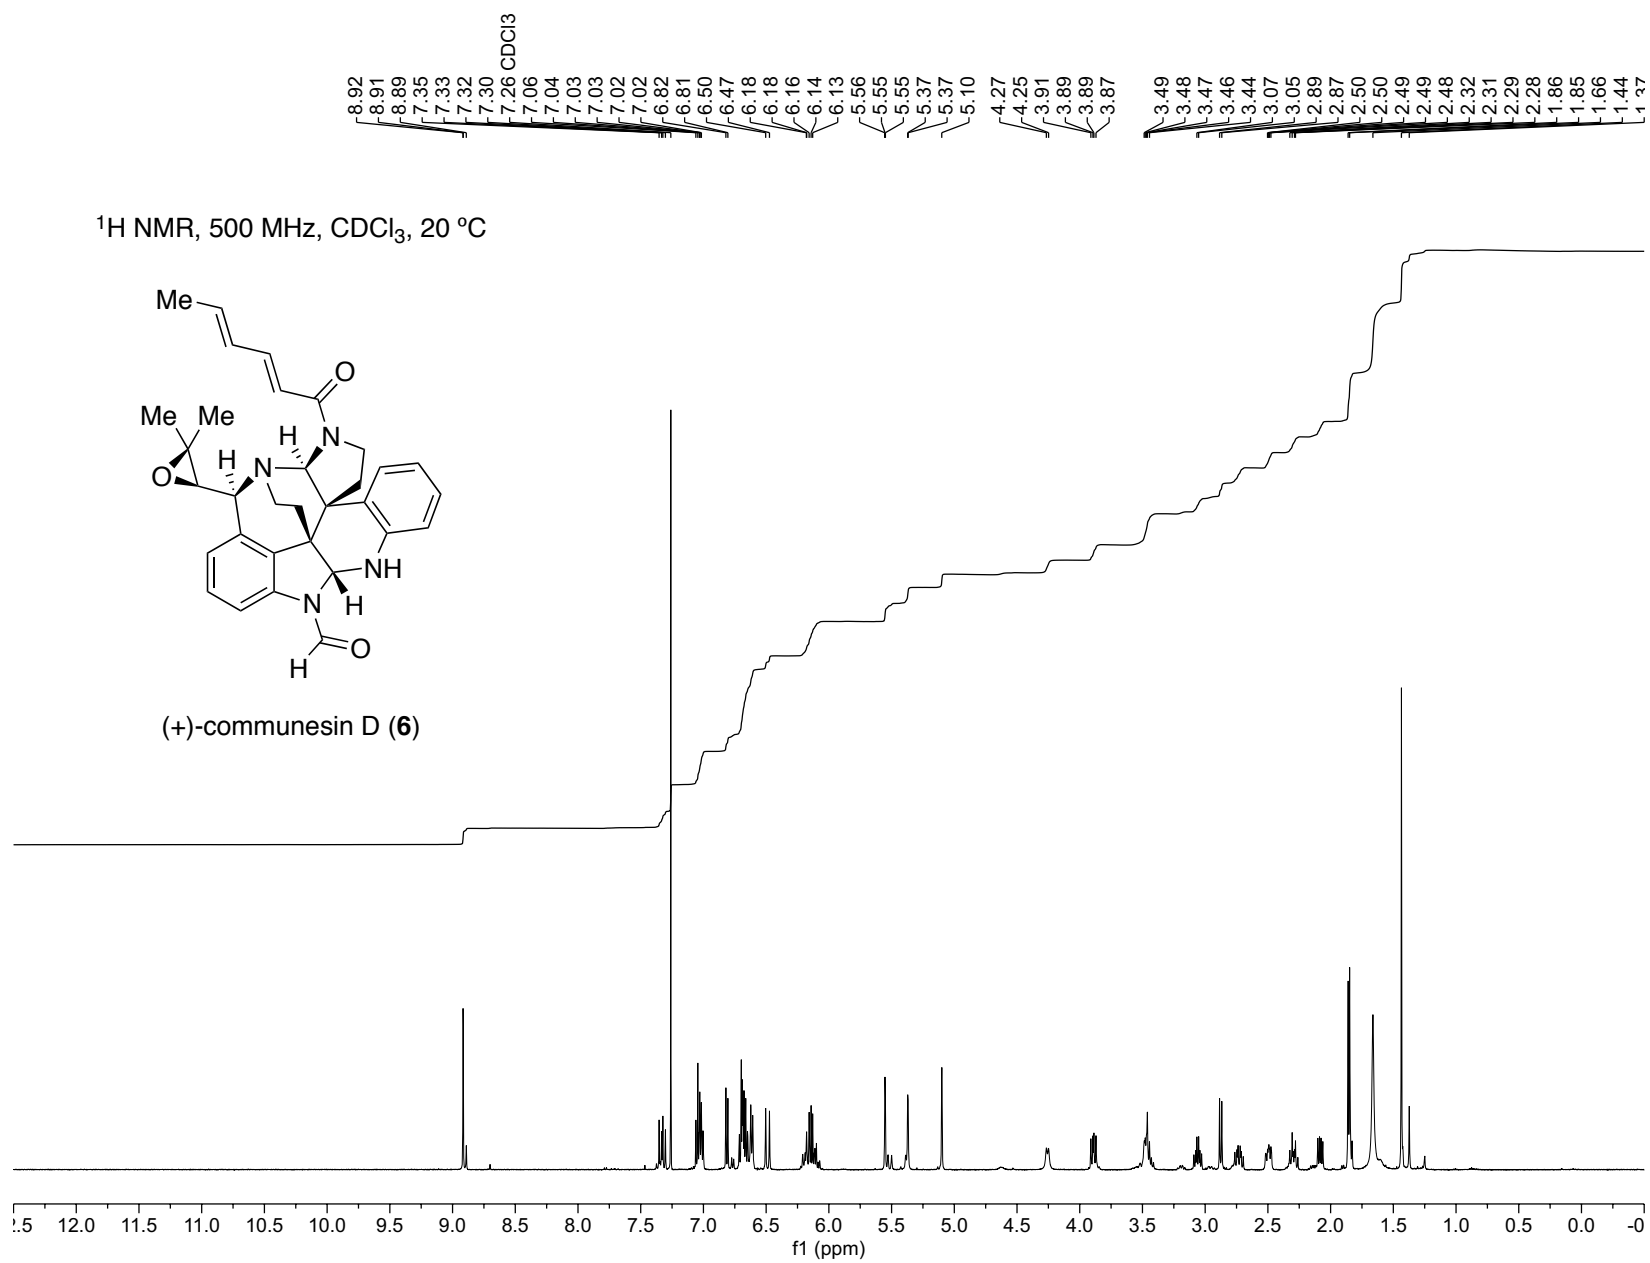



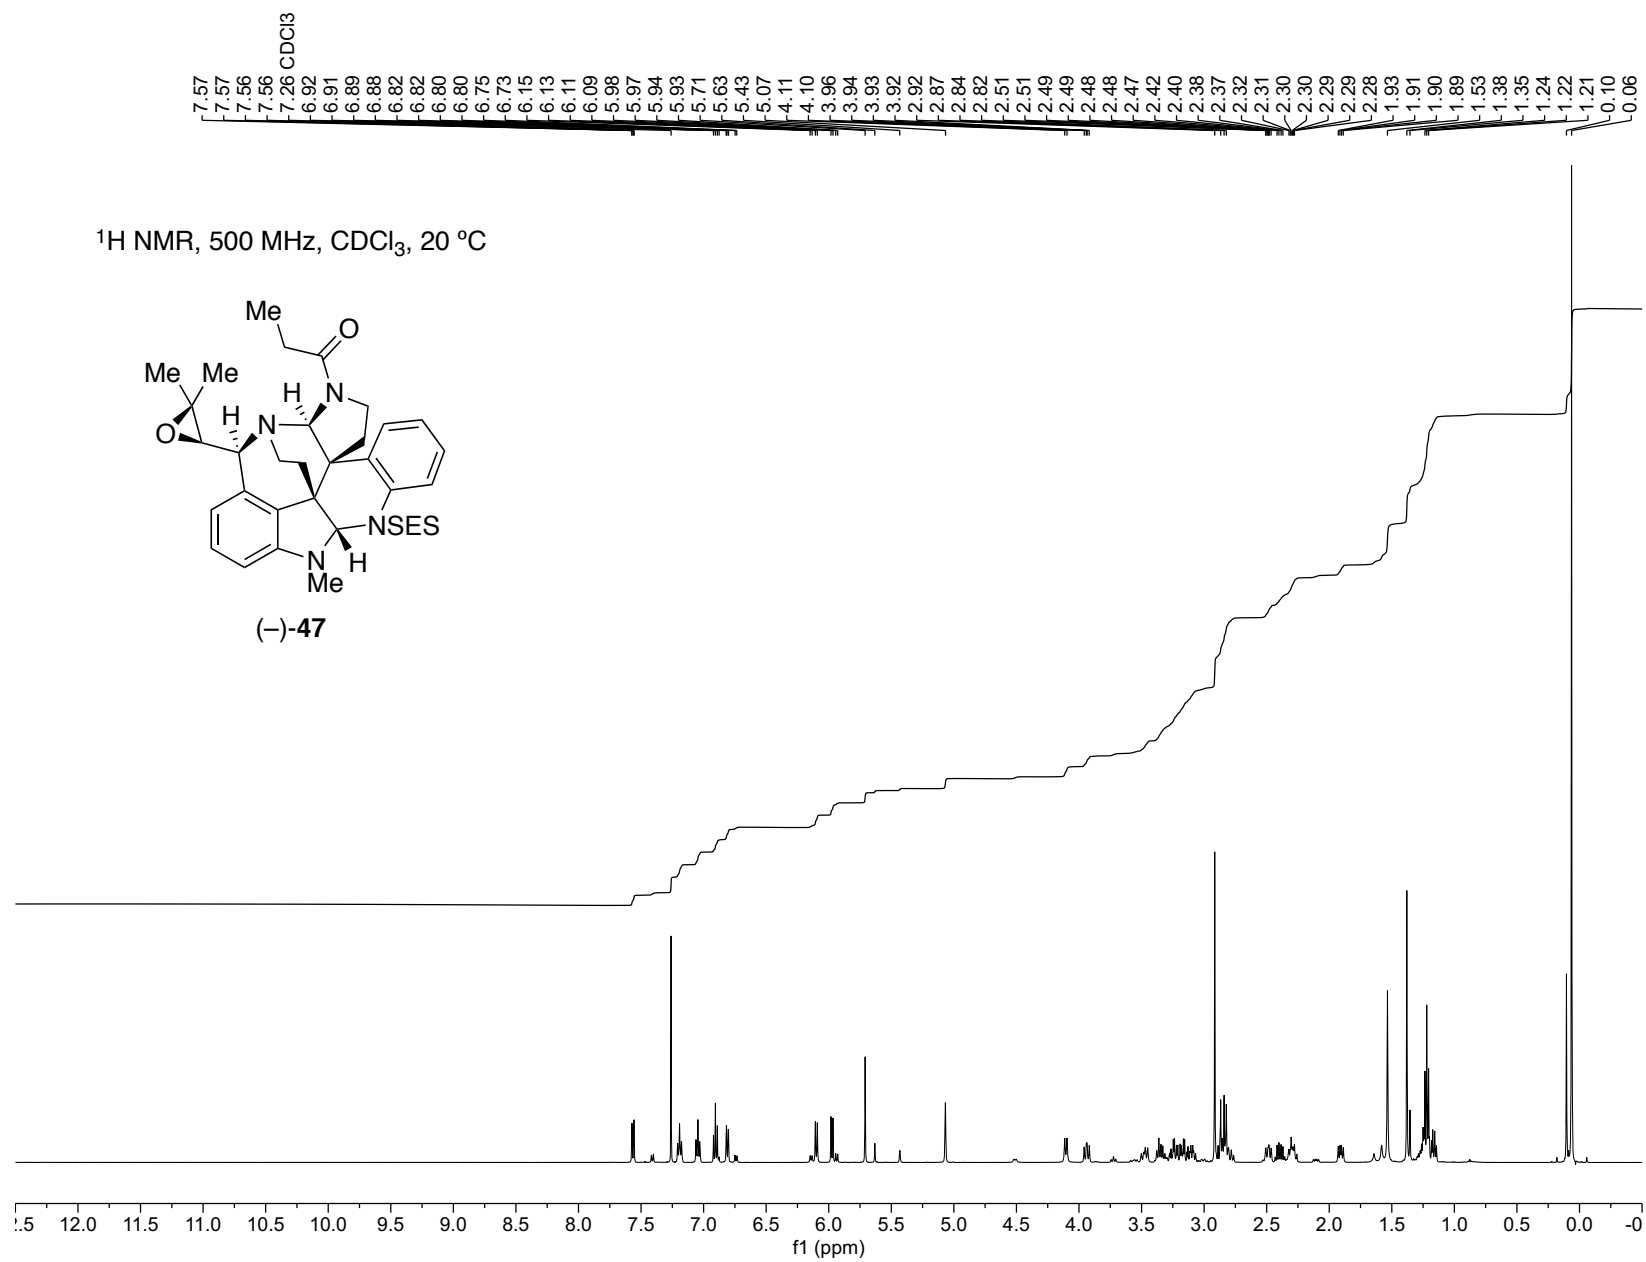

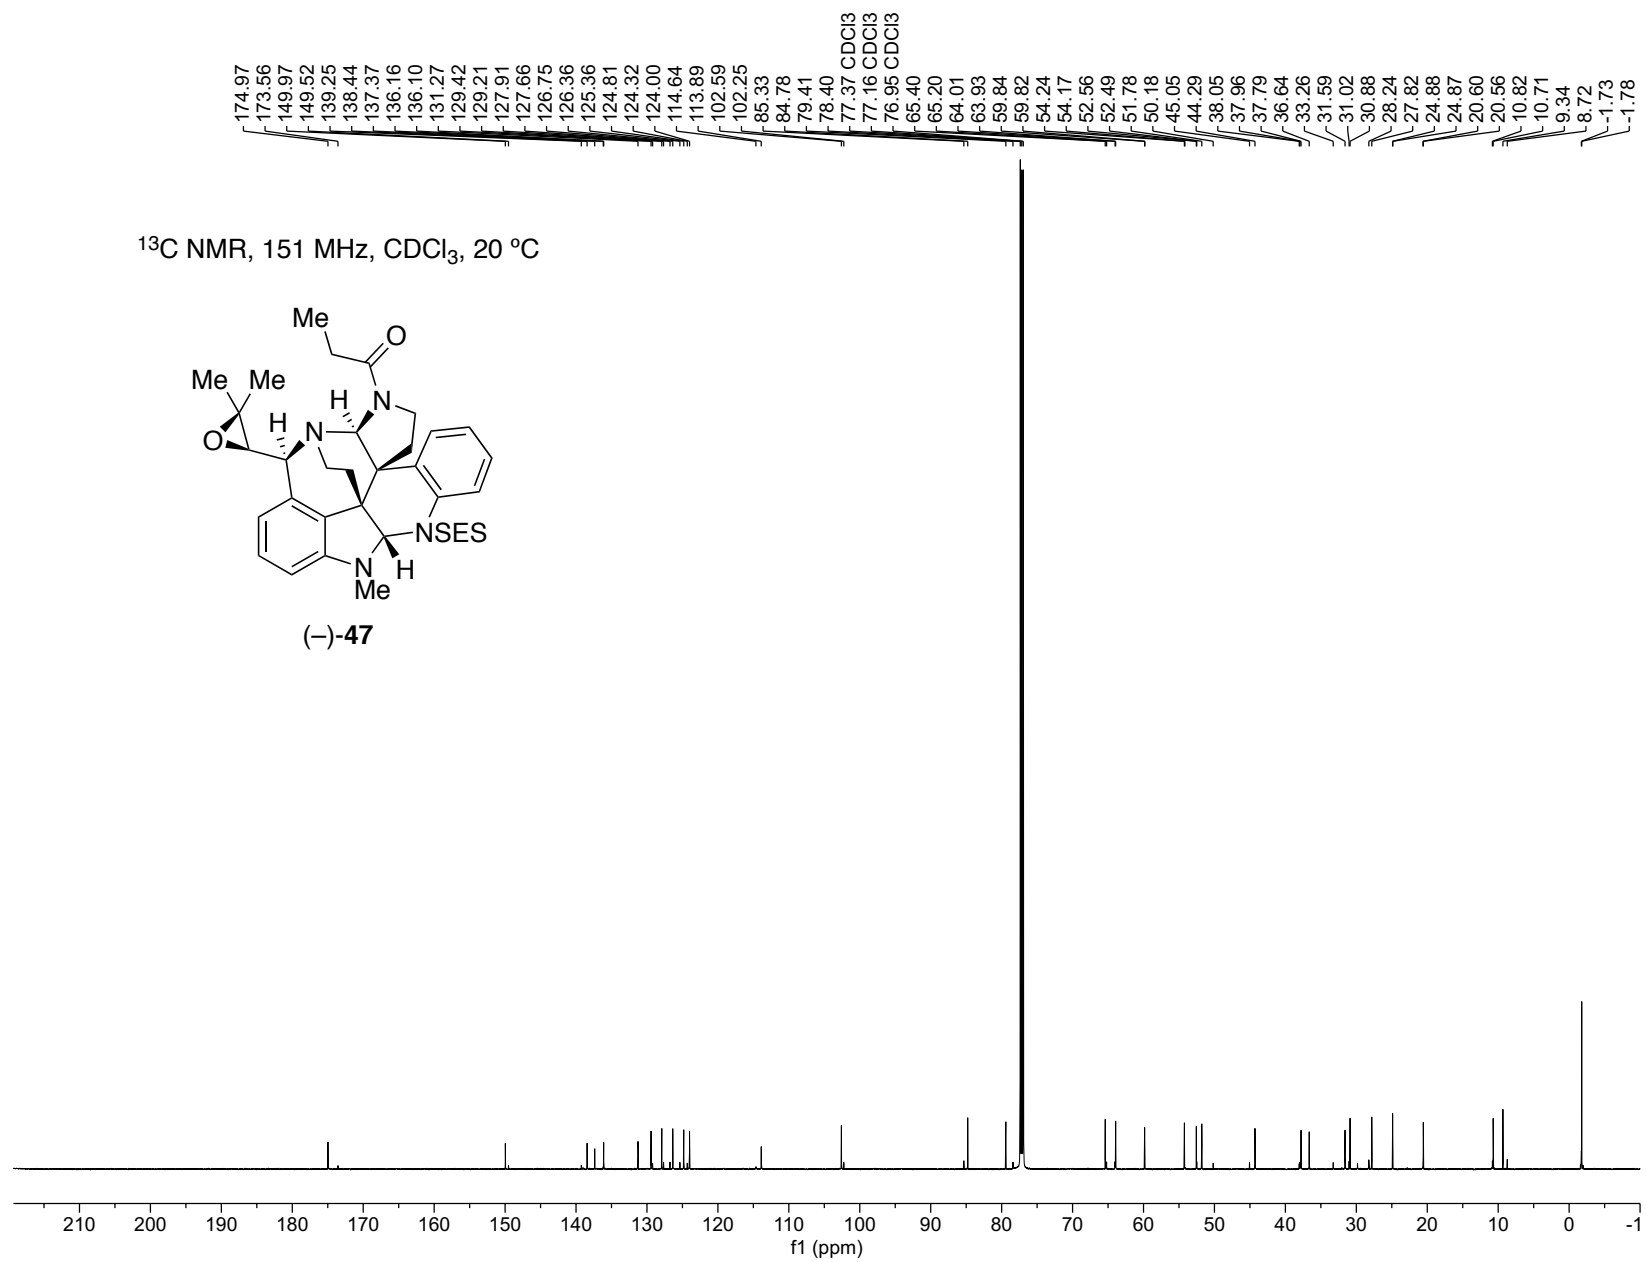

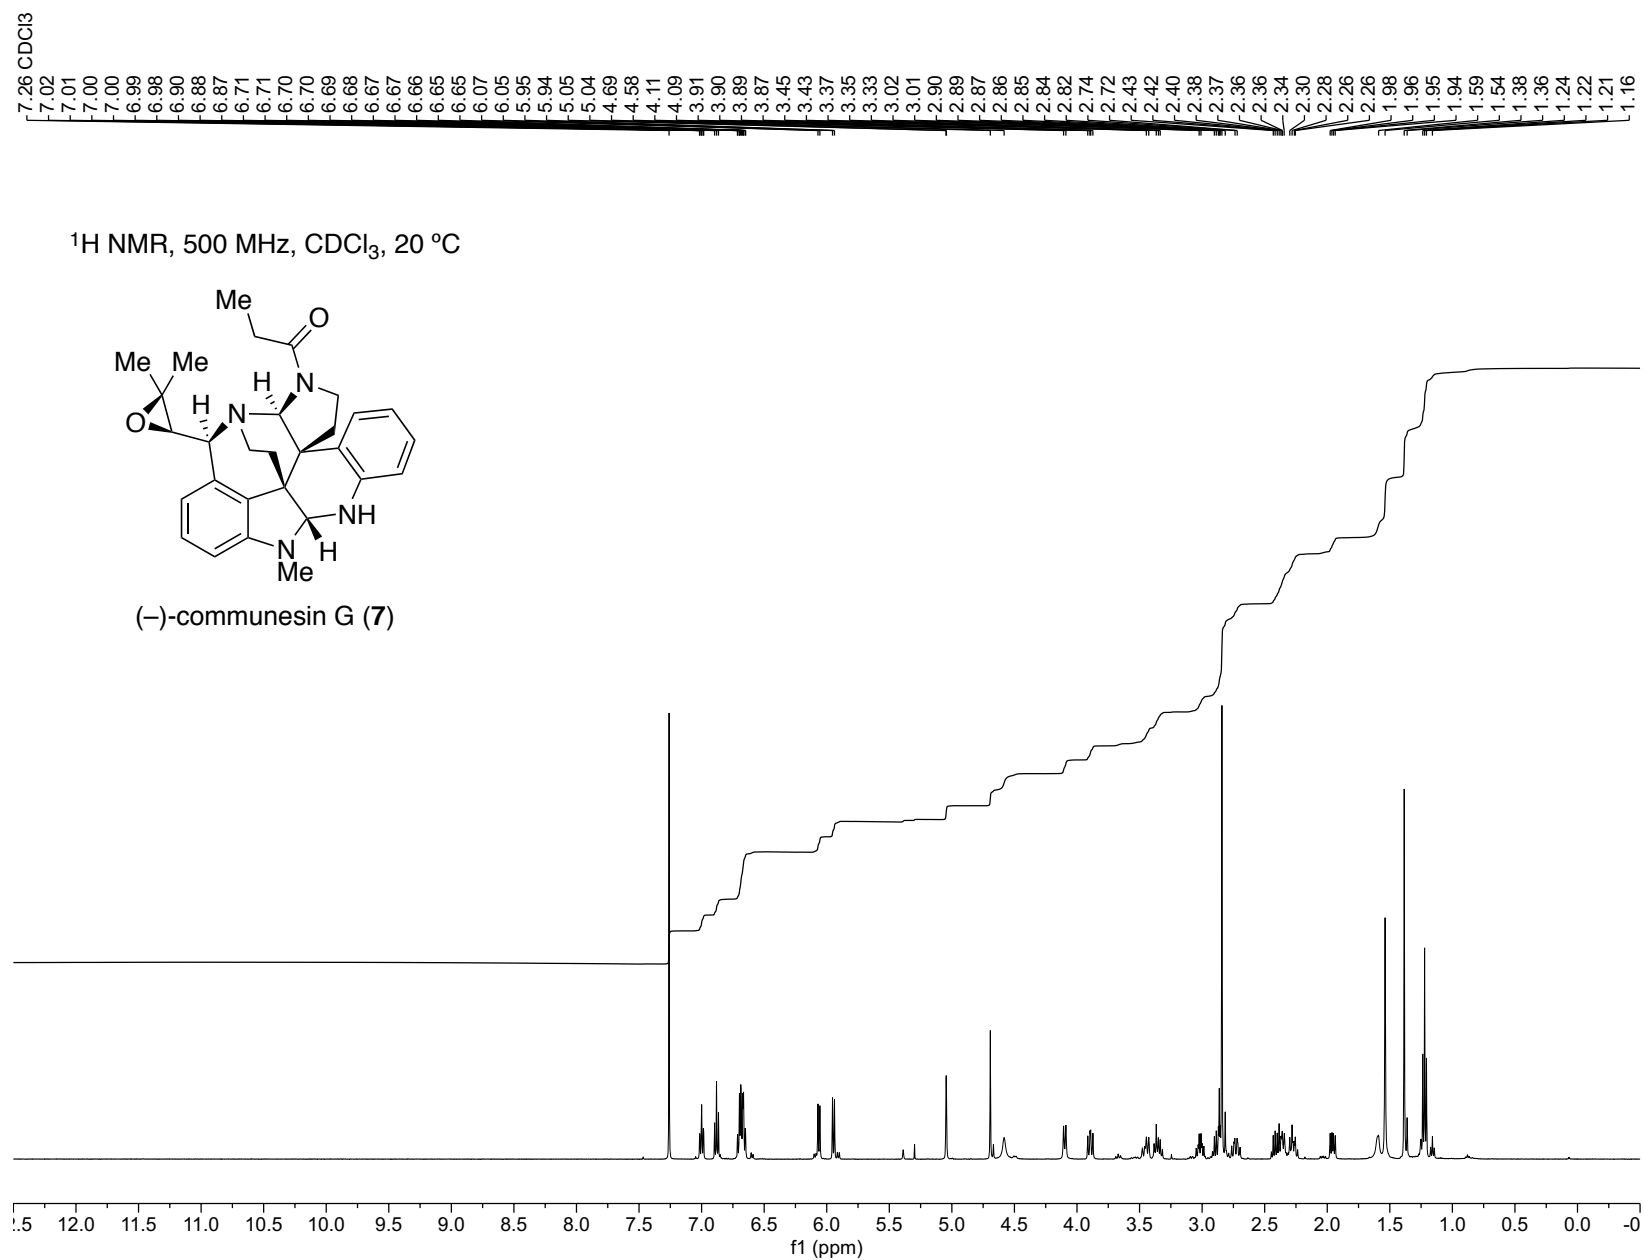



$^{13}\text{C}$  NMR, 151 MHz,  $\text{CDCl}_3$ , 20 °C

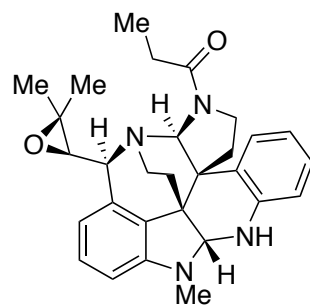

(-)-communesin G (7)

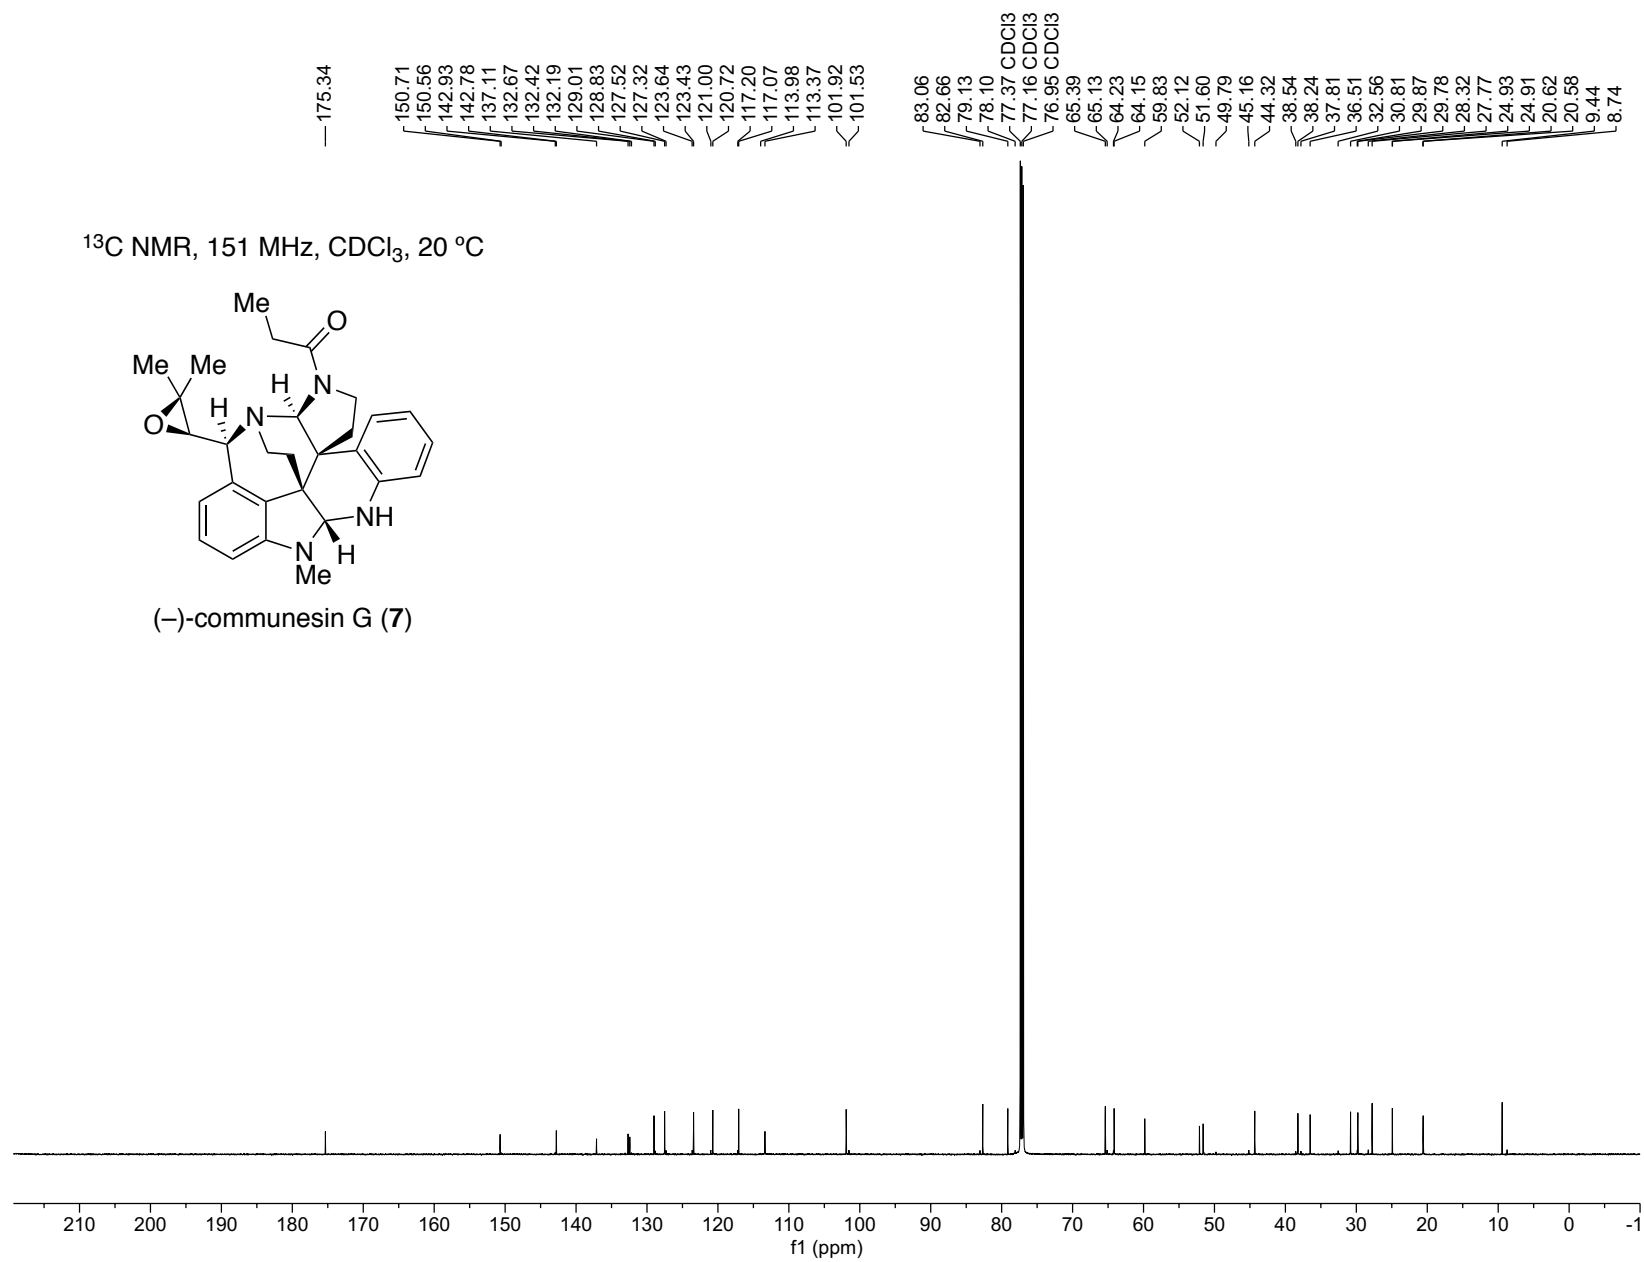

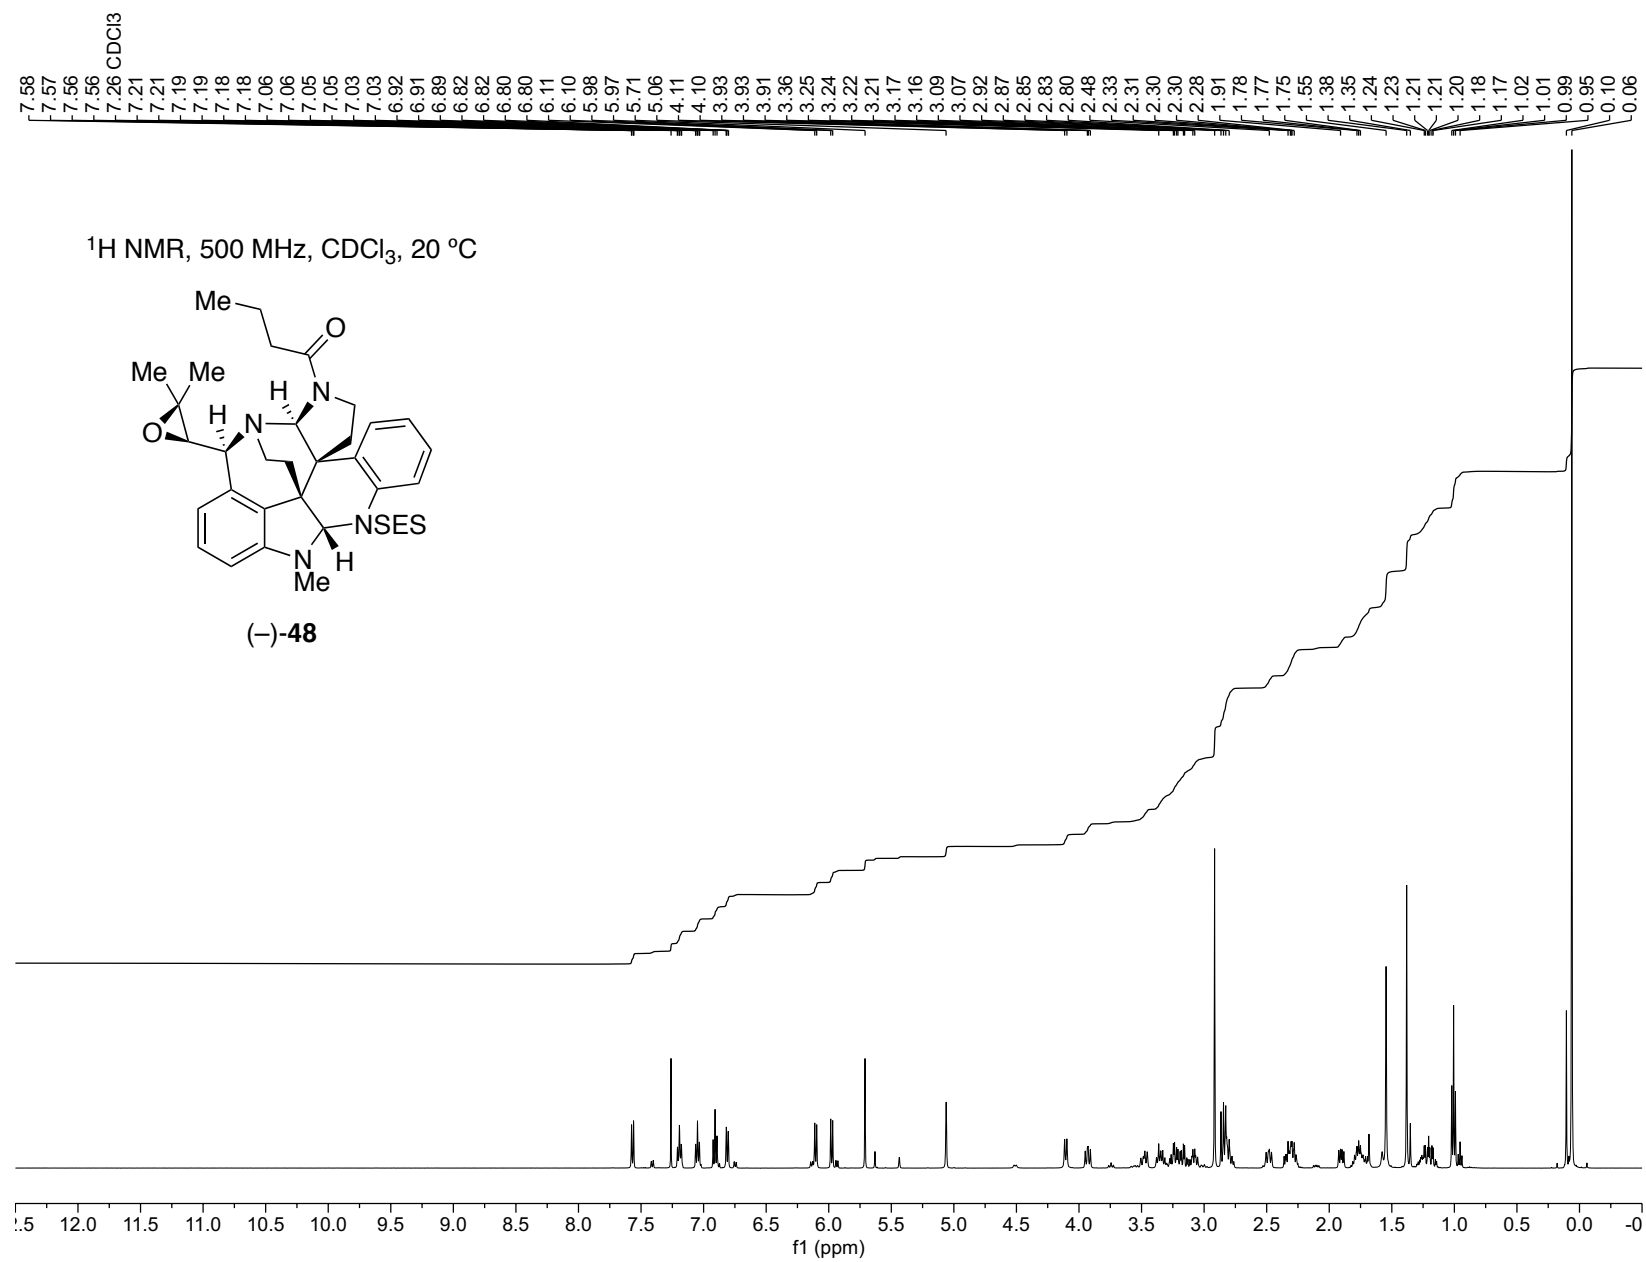

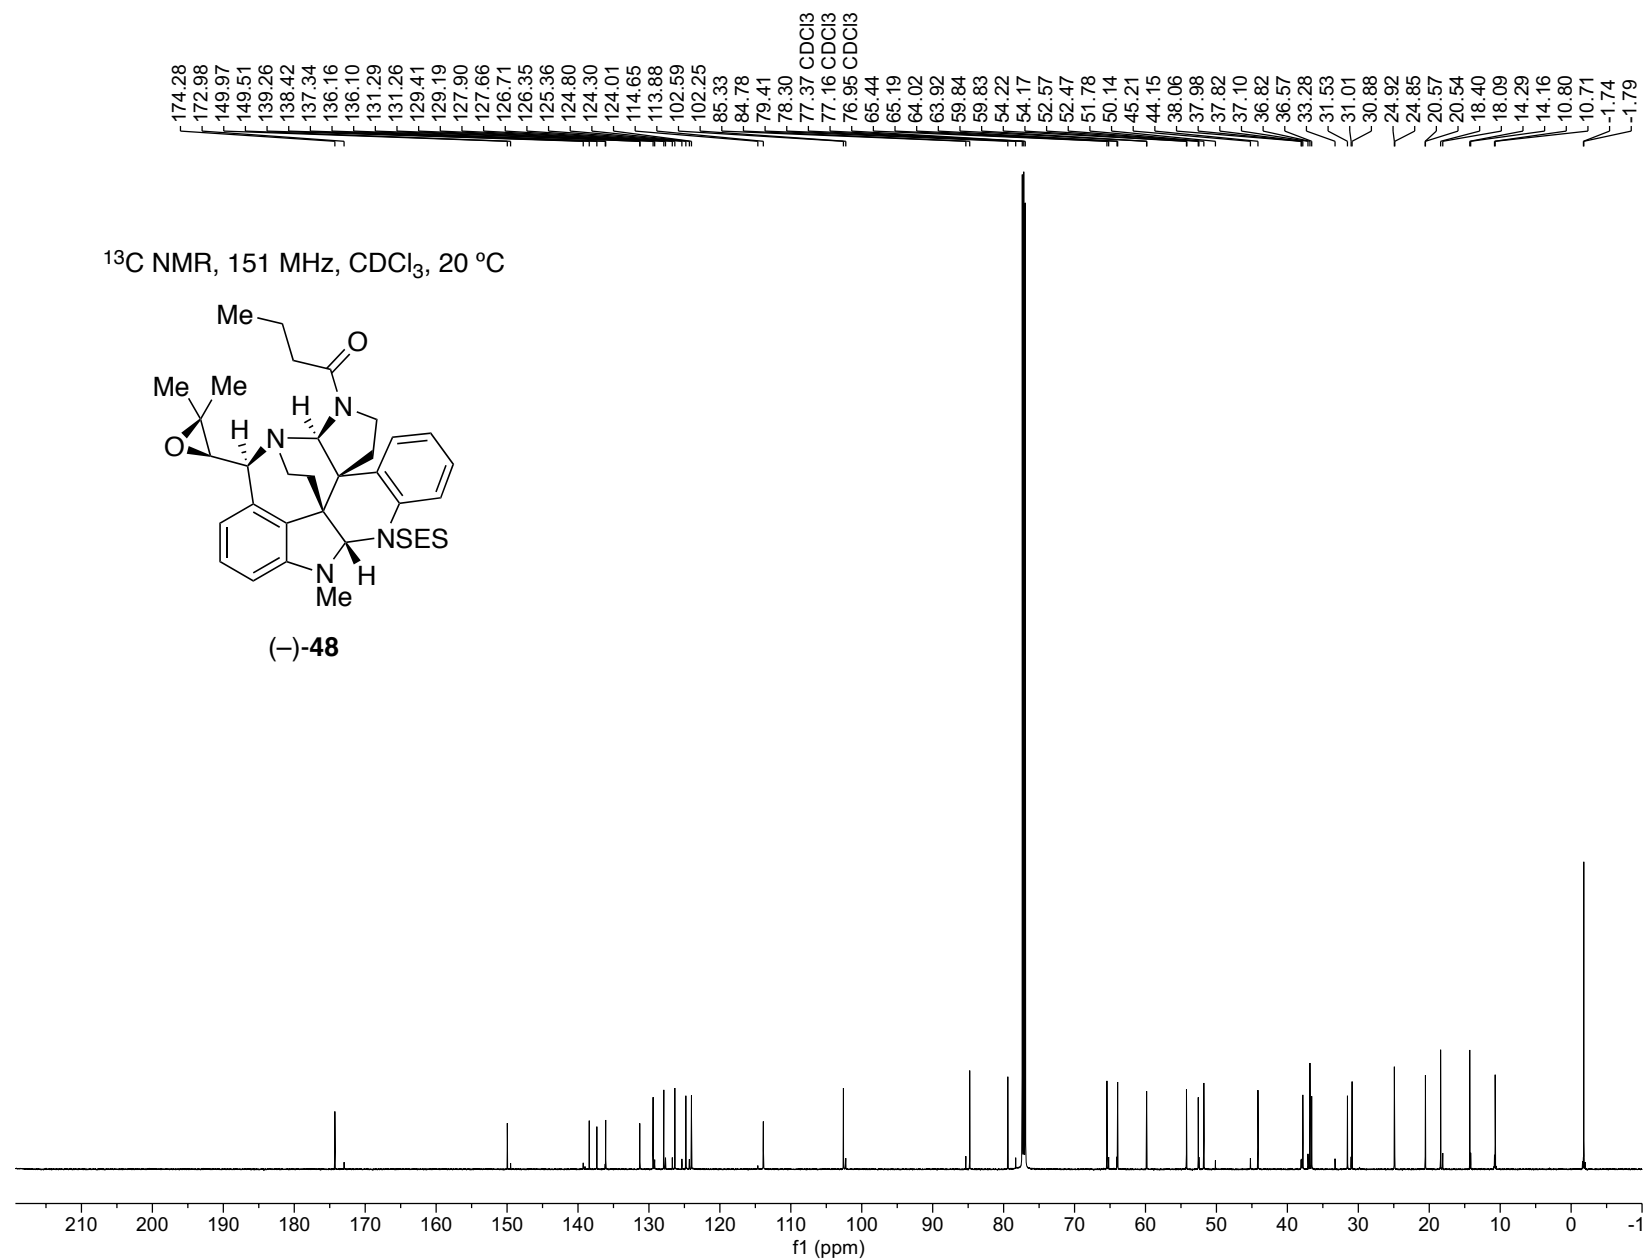

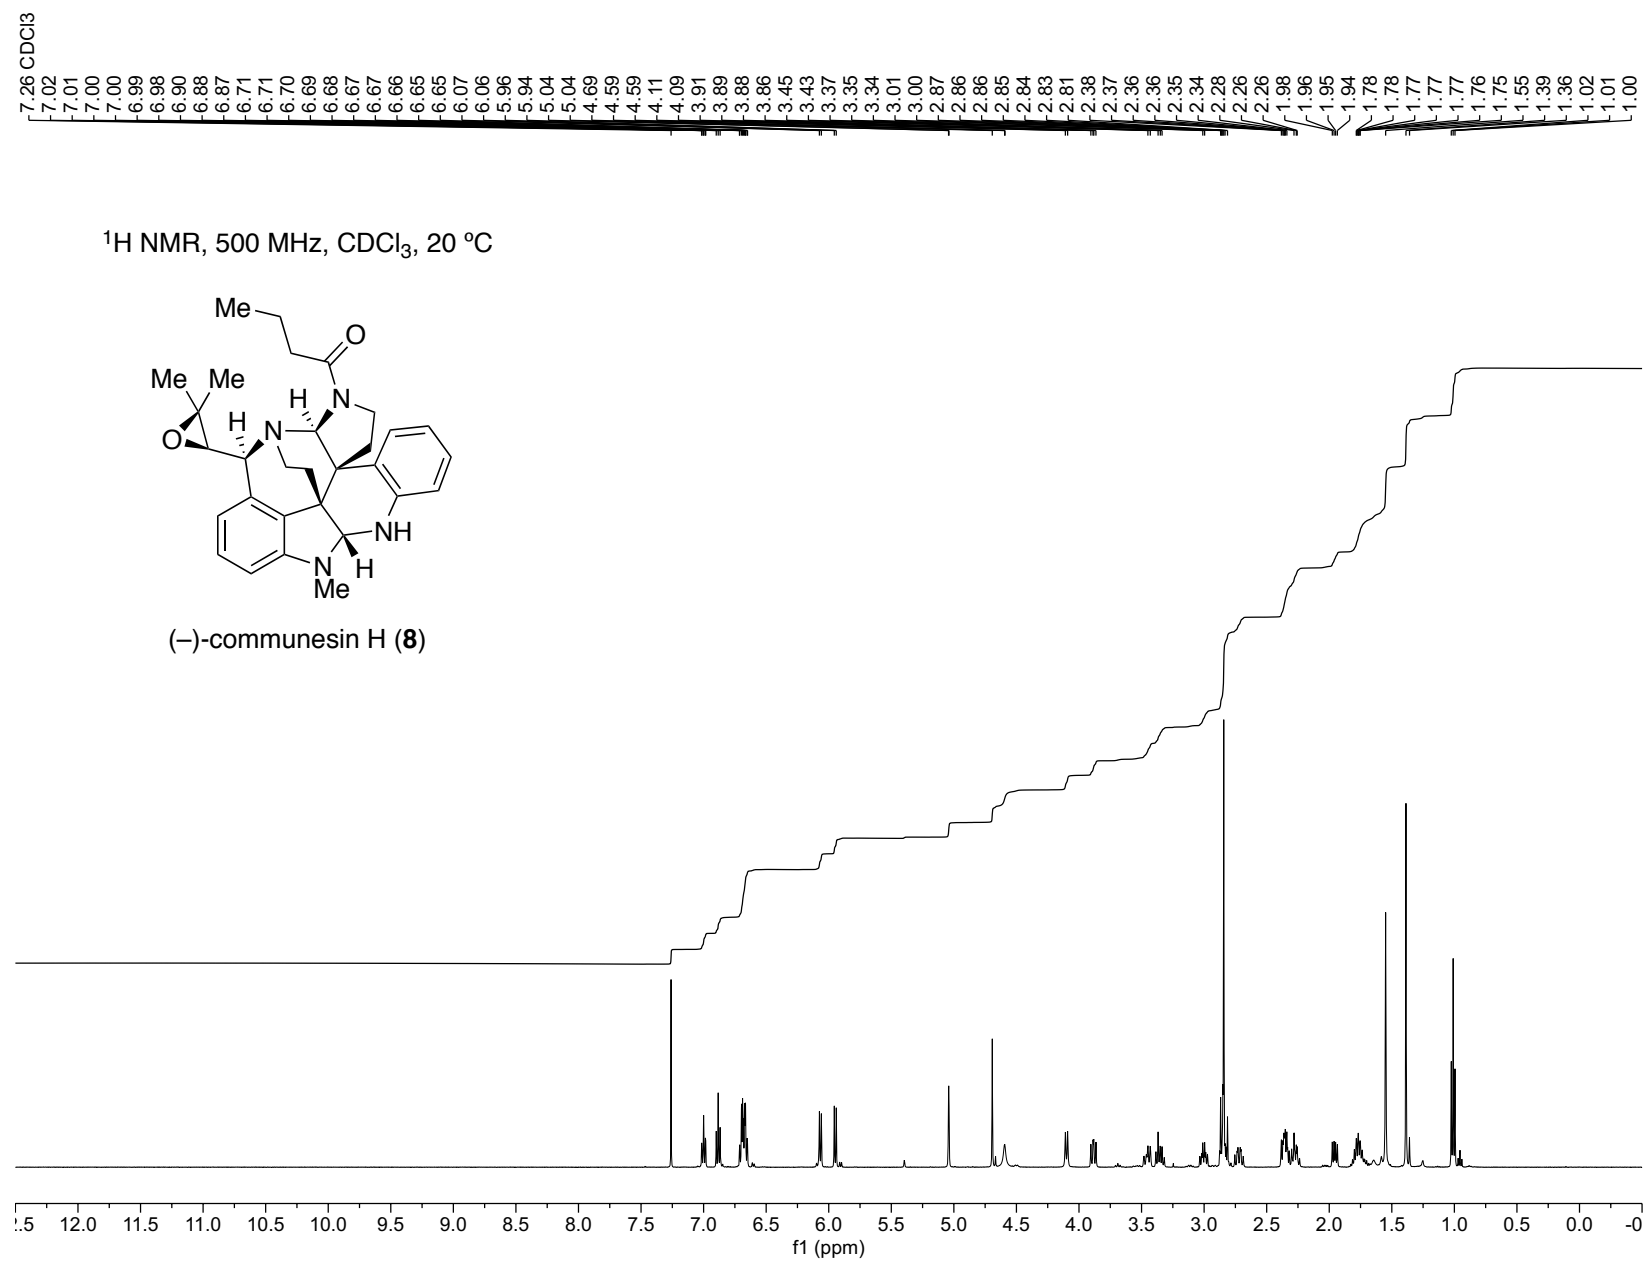

$^{13}\text{C}$  NMR, 151 MHz,  $\text{CDCl}_3$ , 20 °C

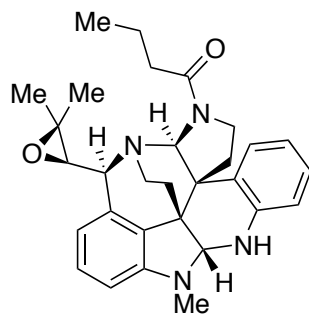

(-)-communesin H (**8**)

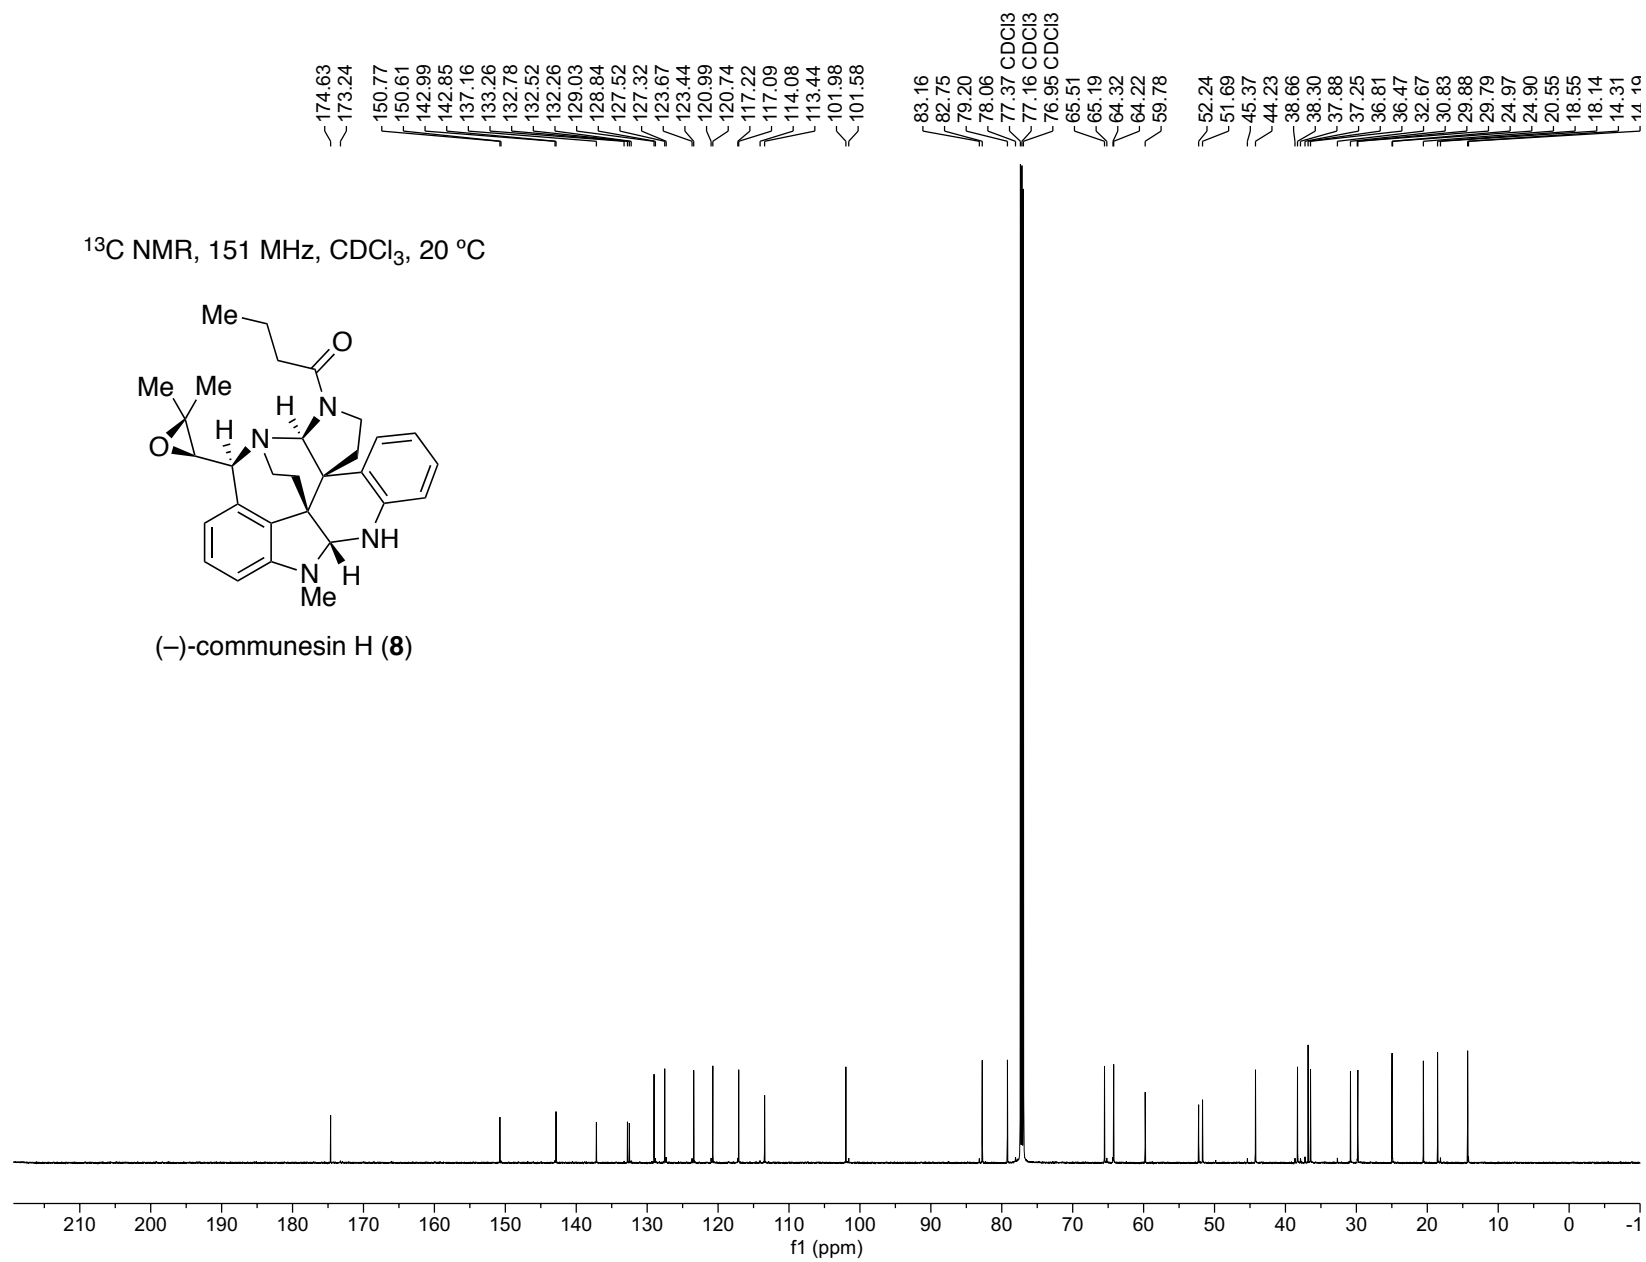

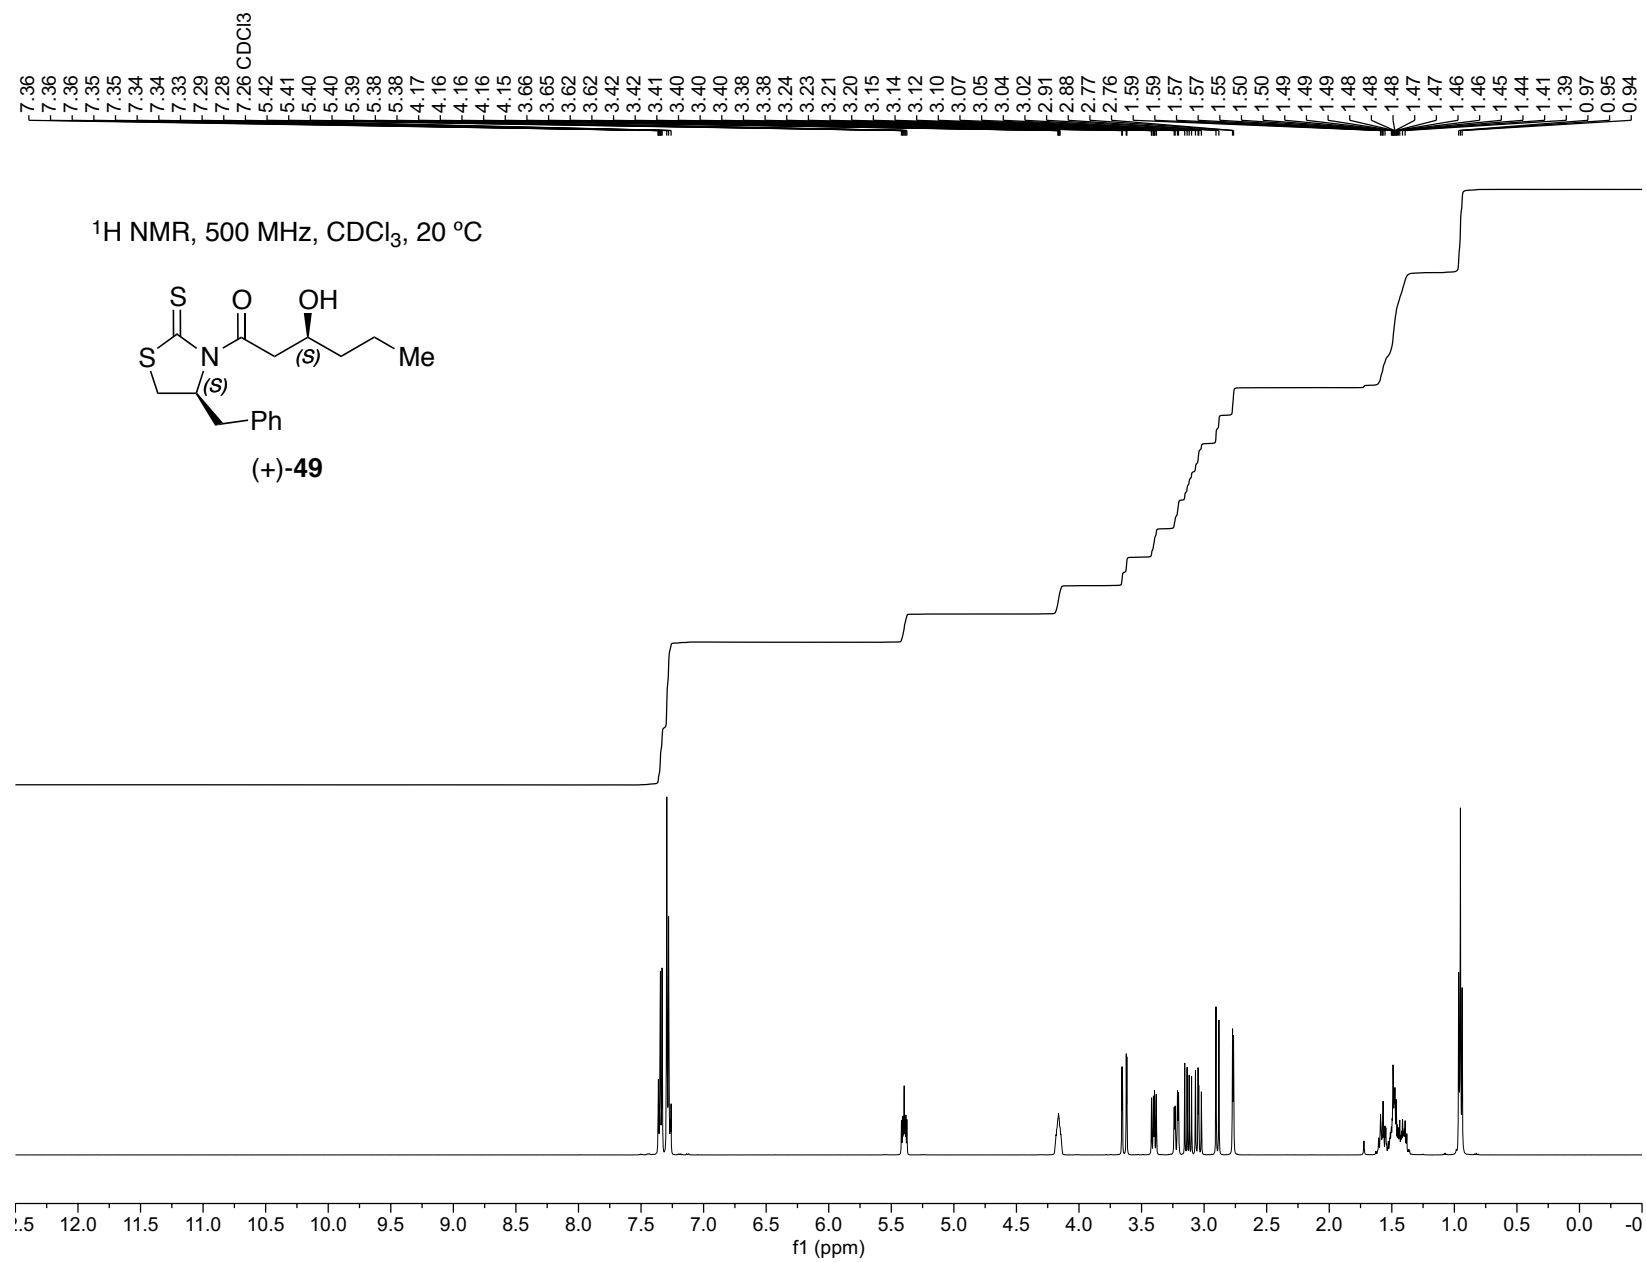

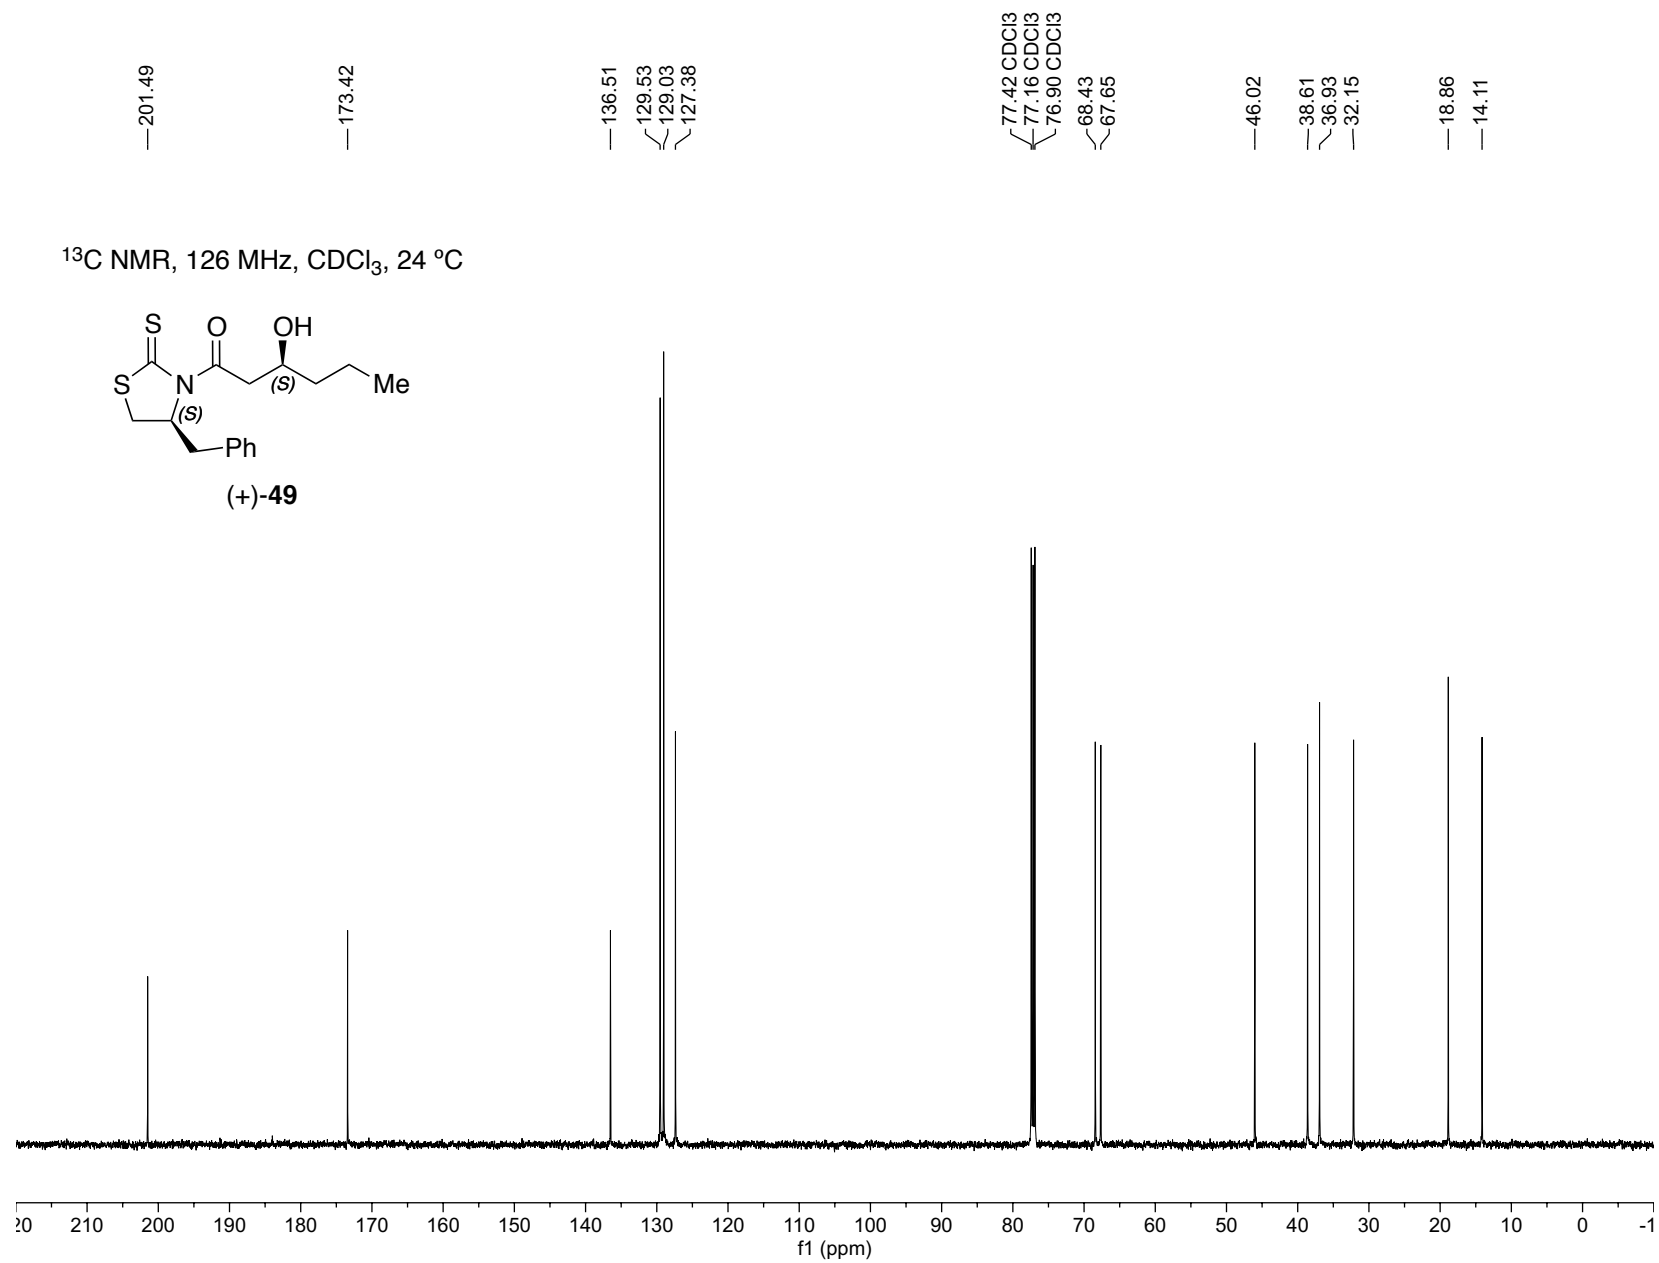

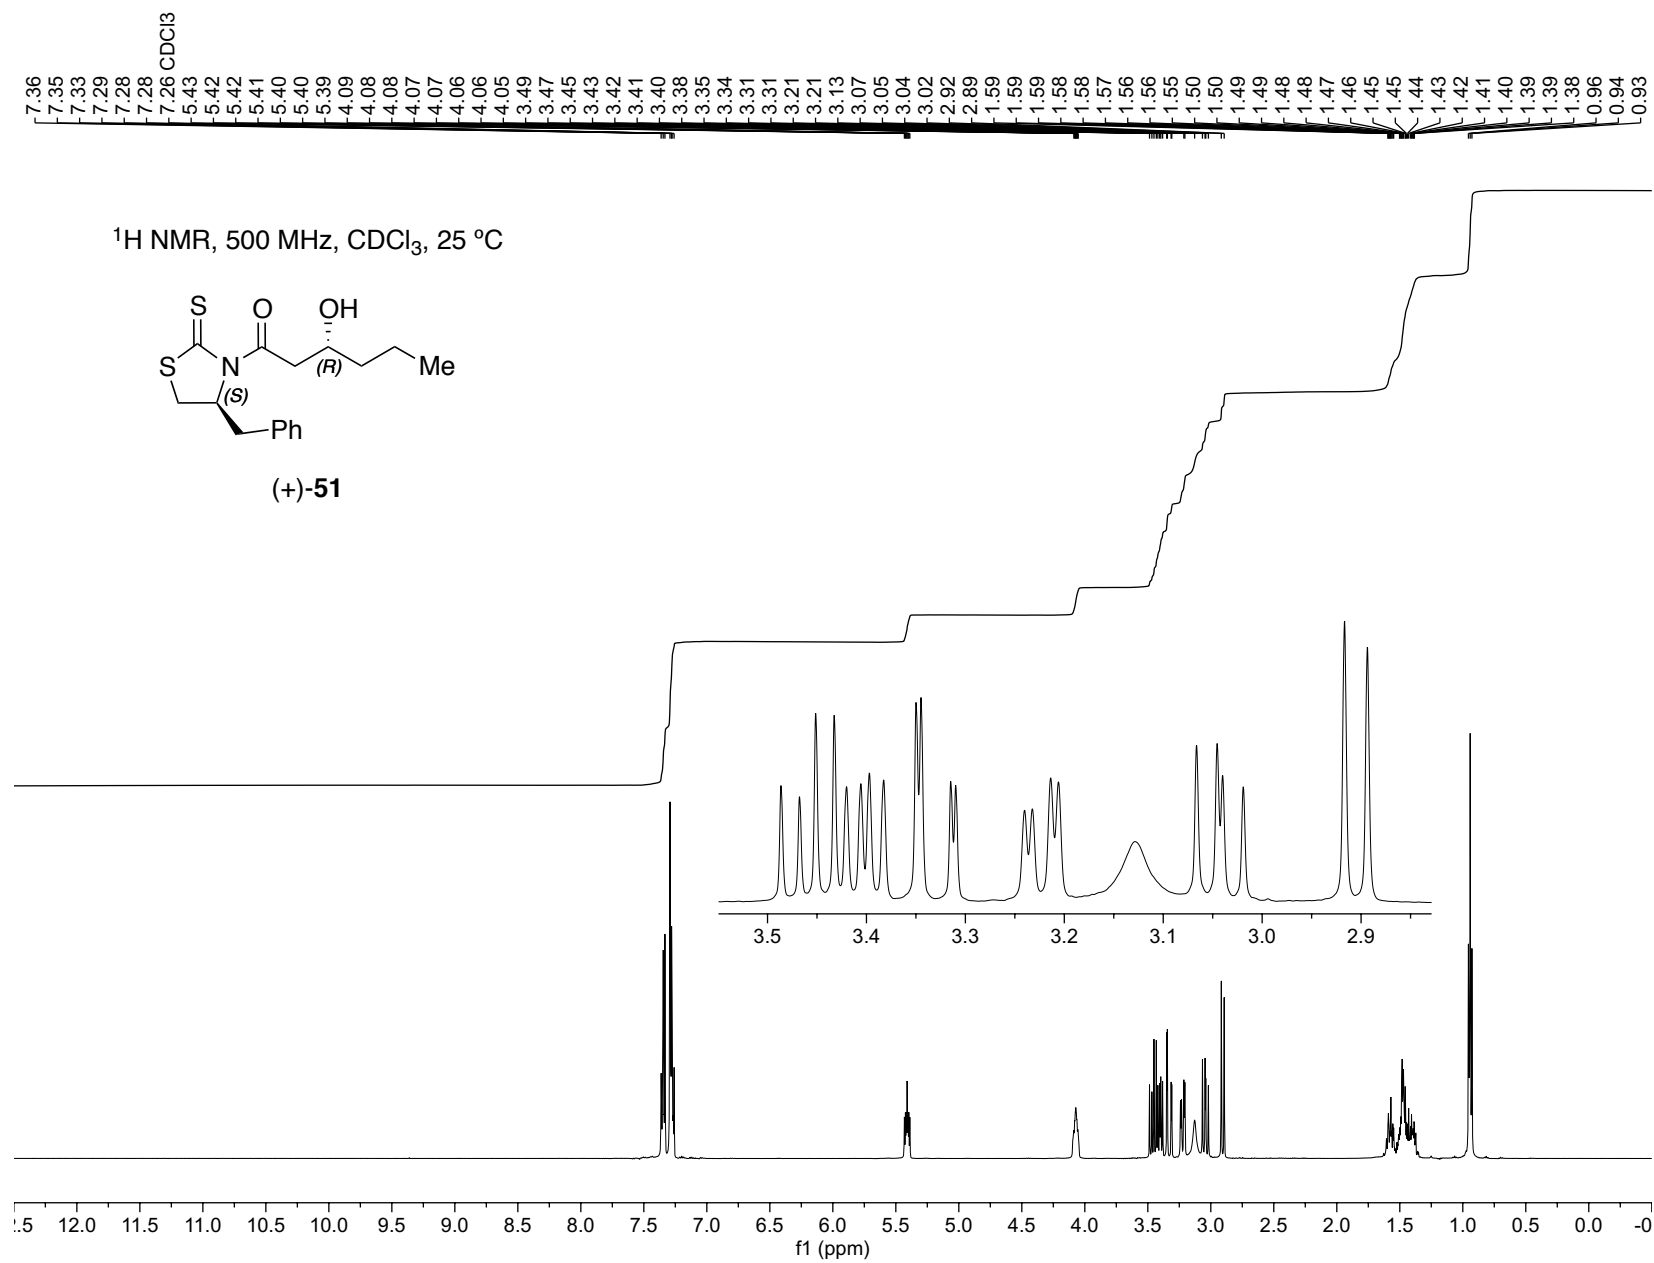



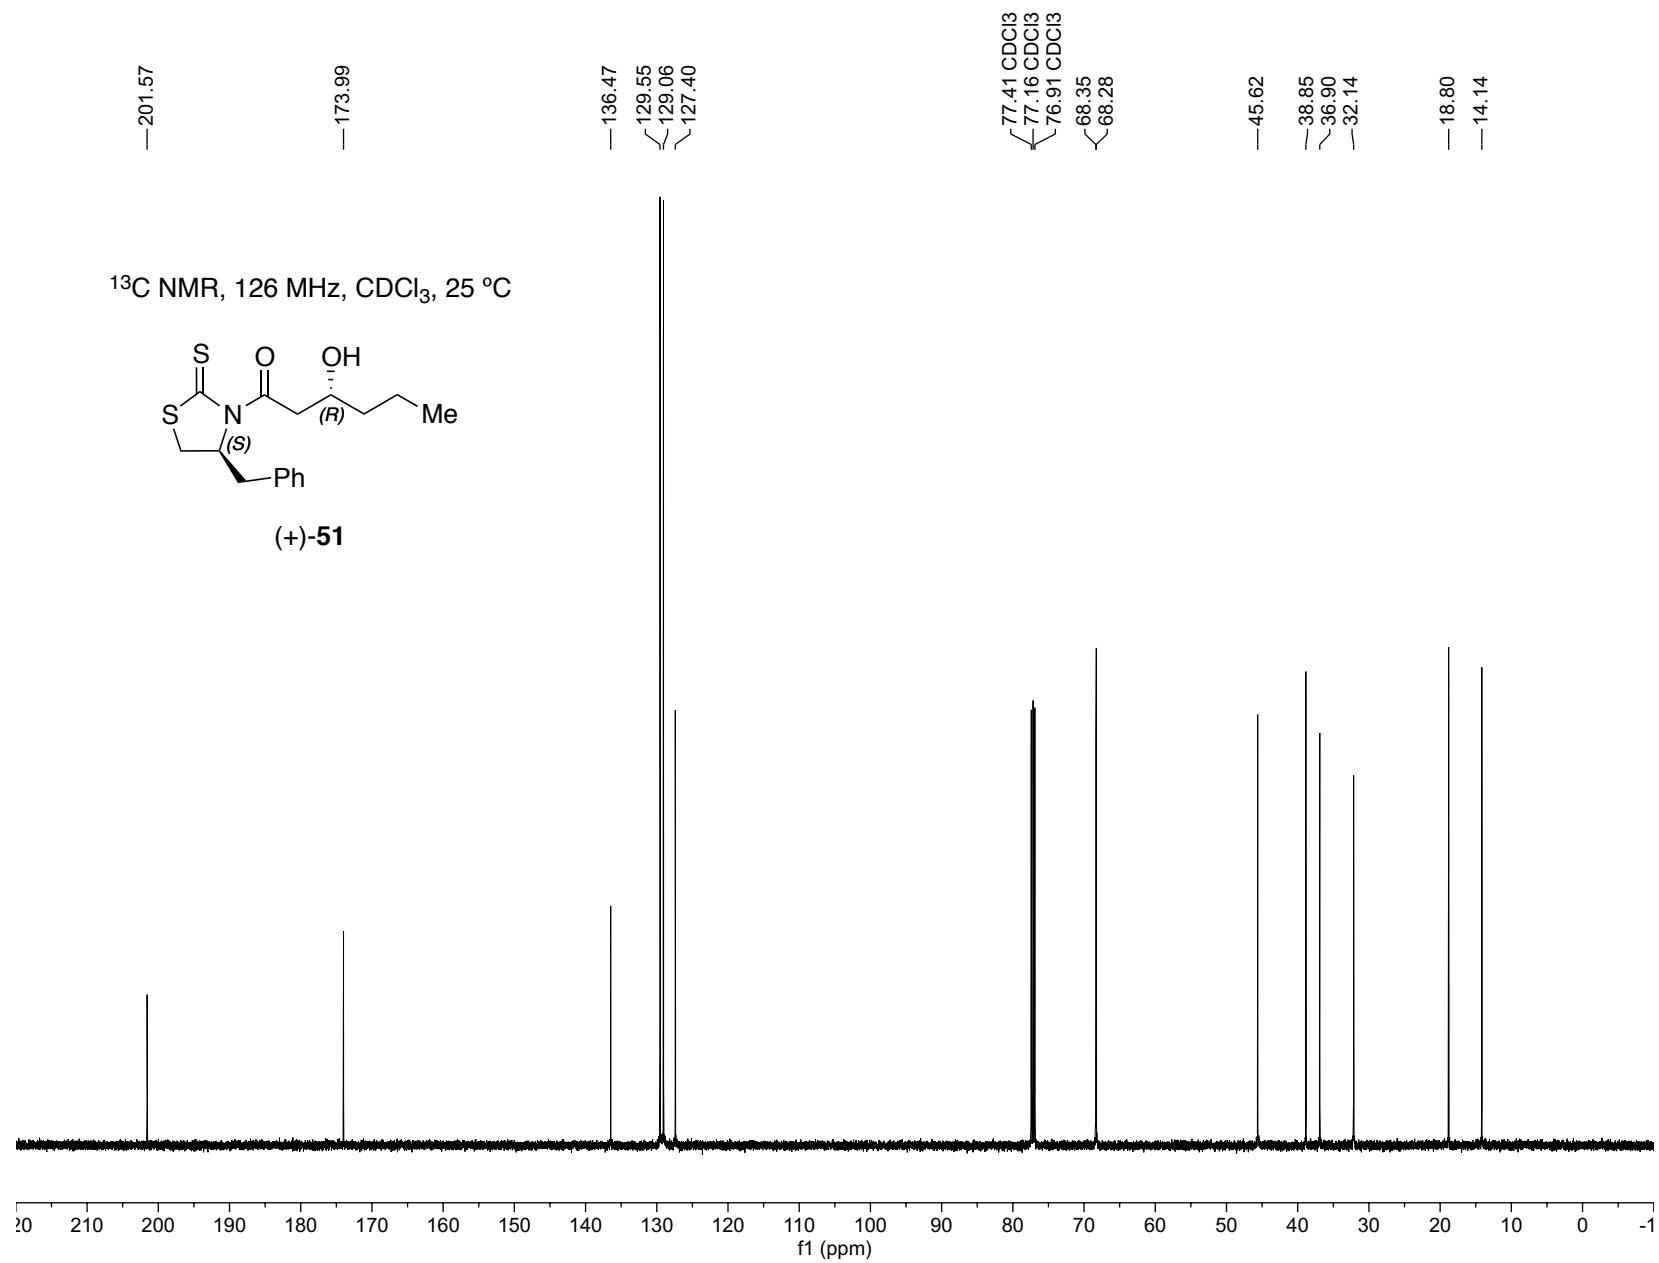

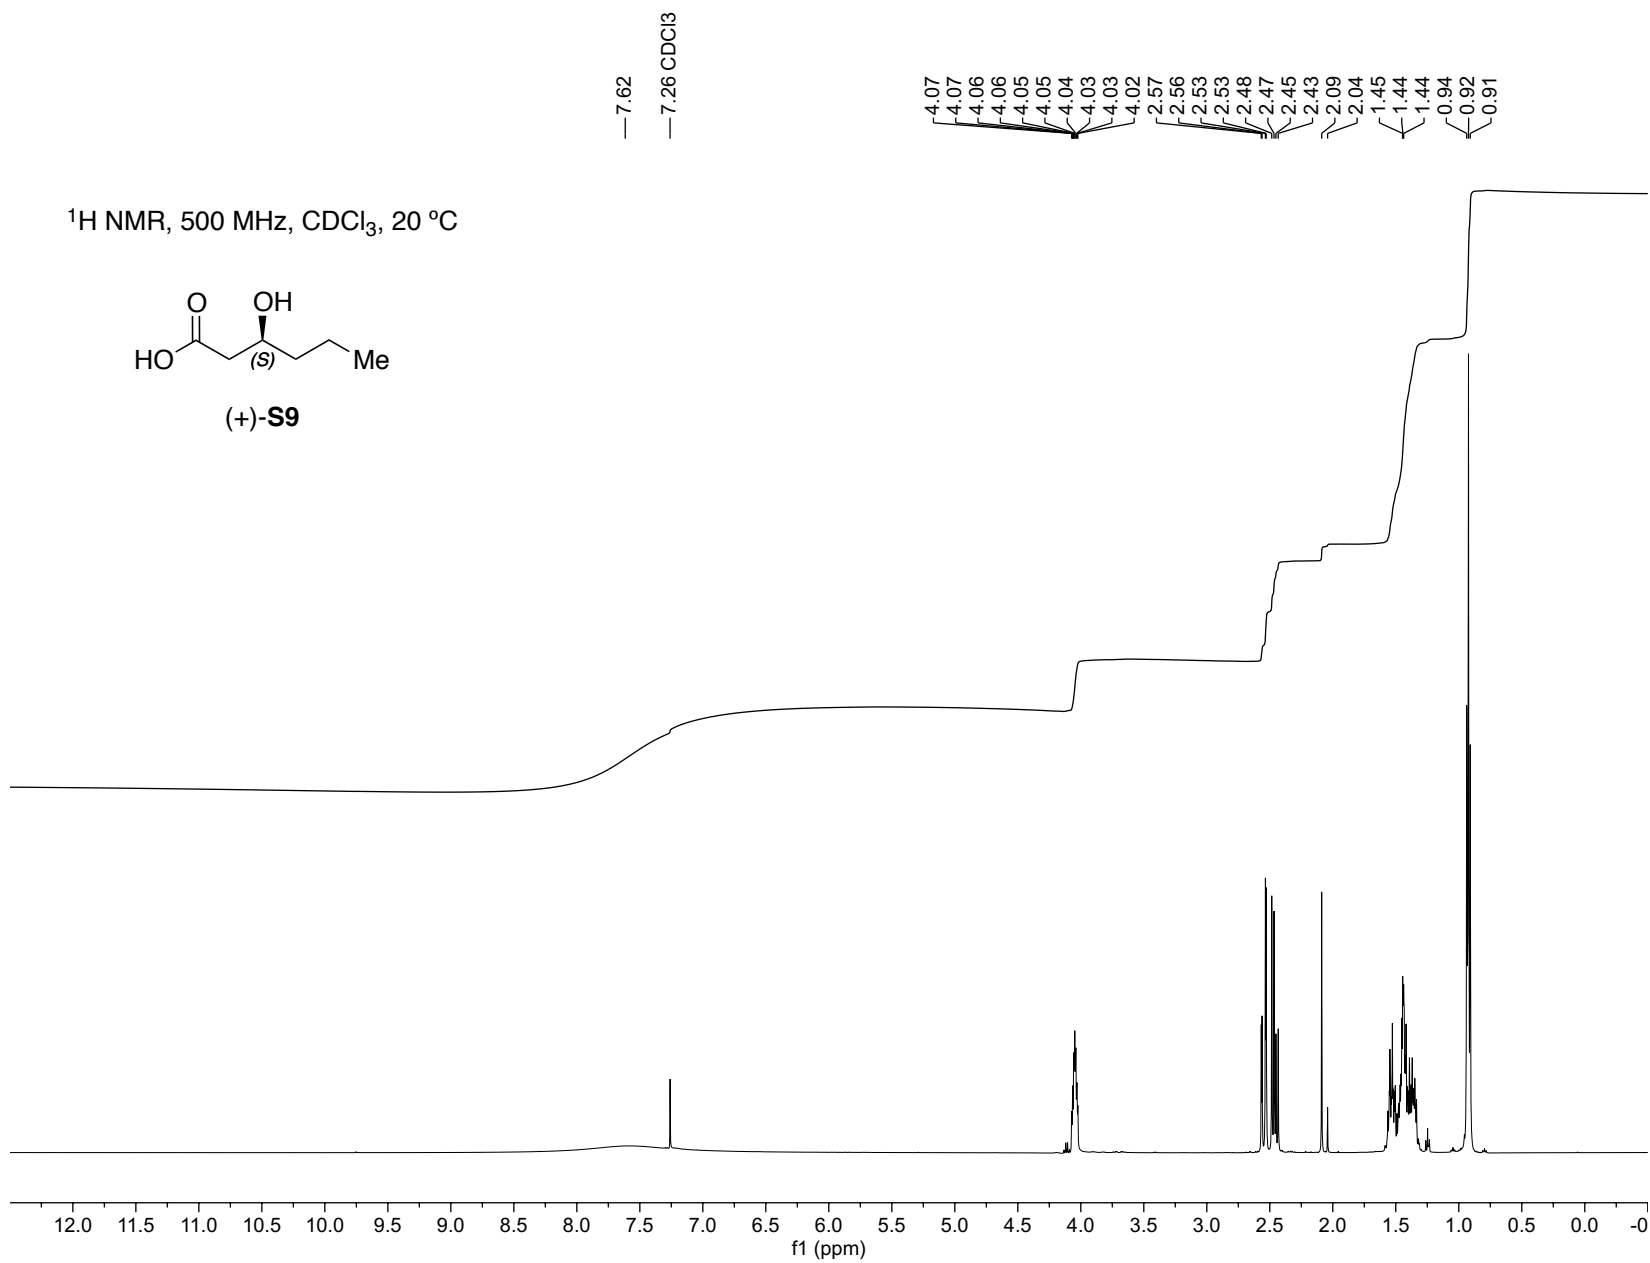

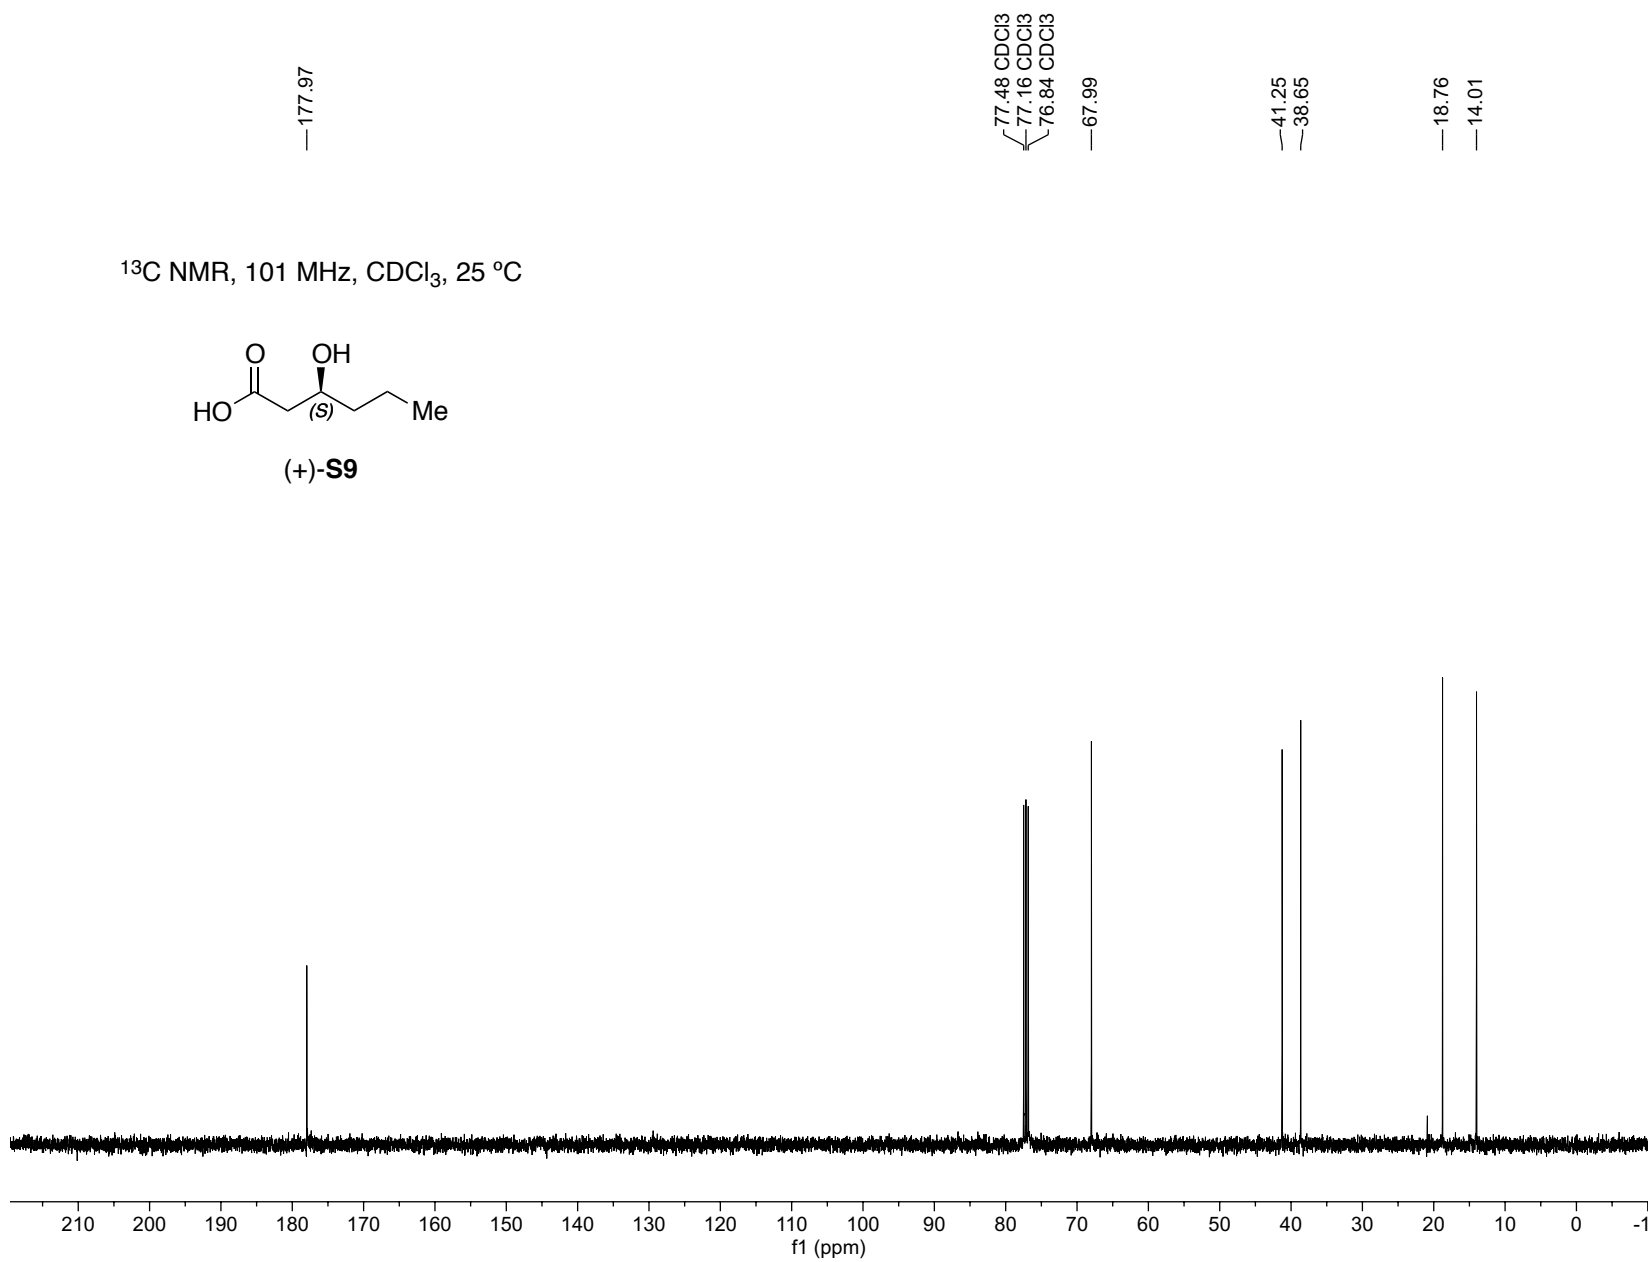

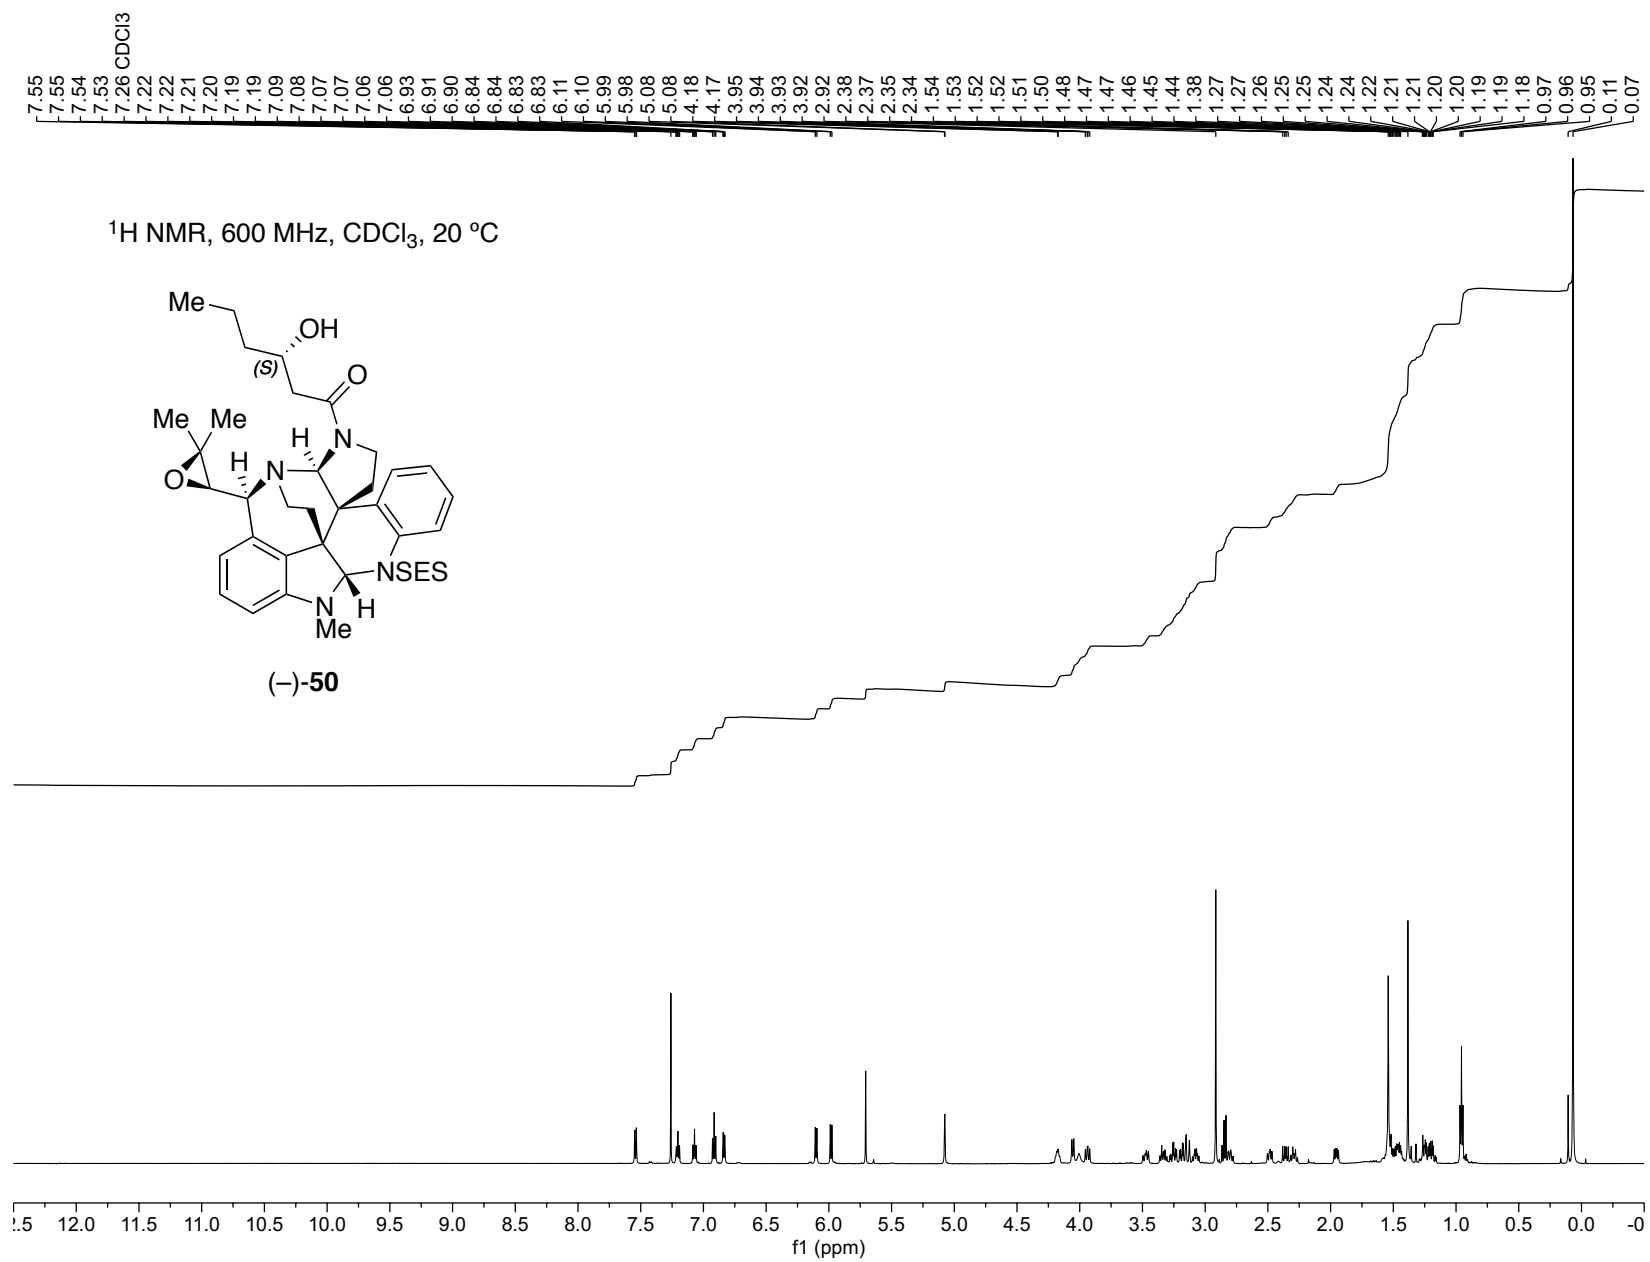

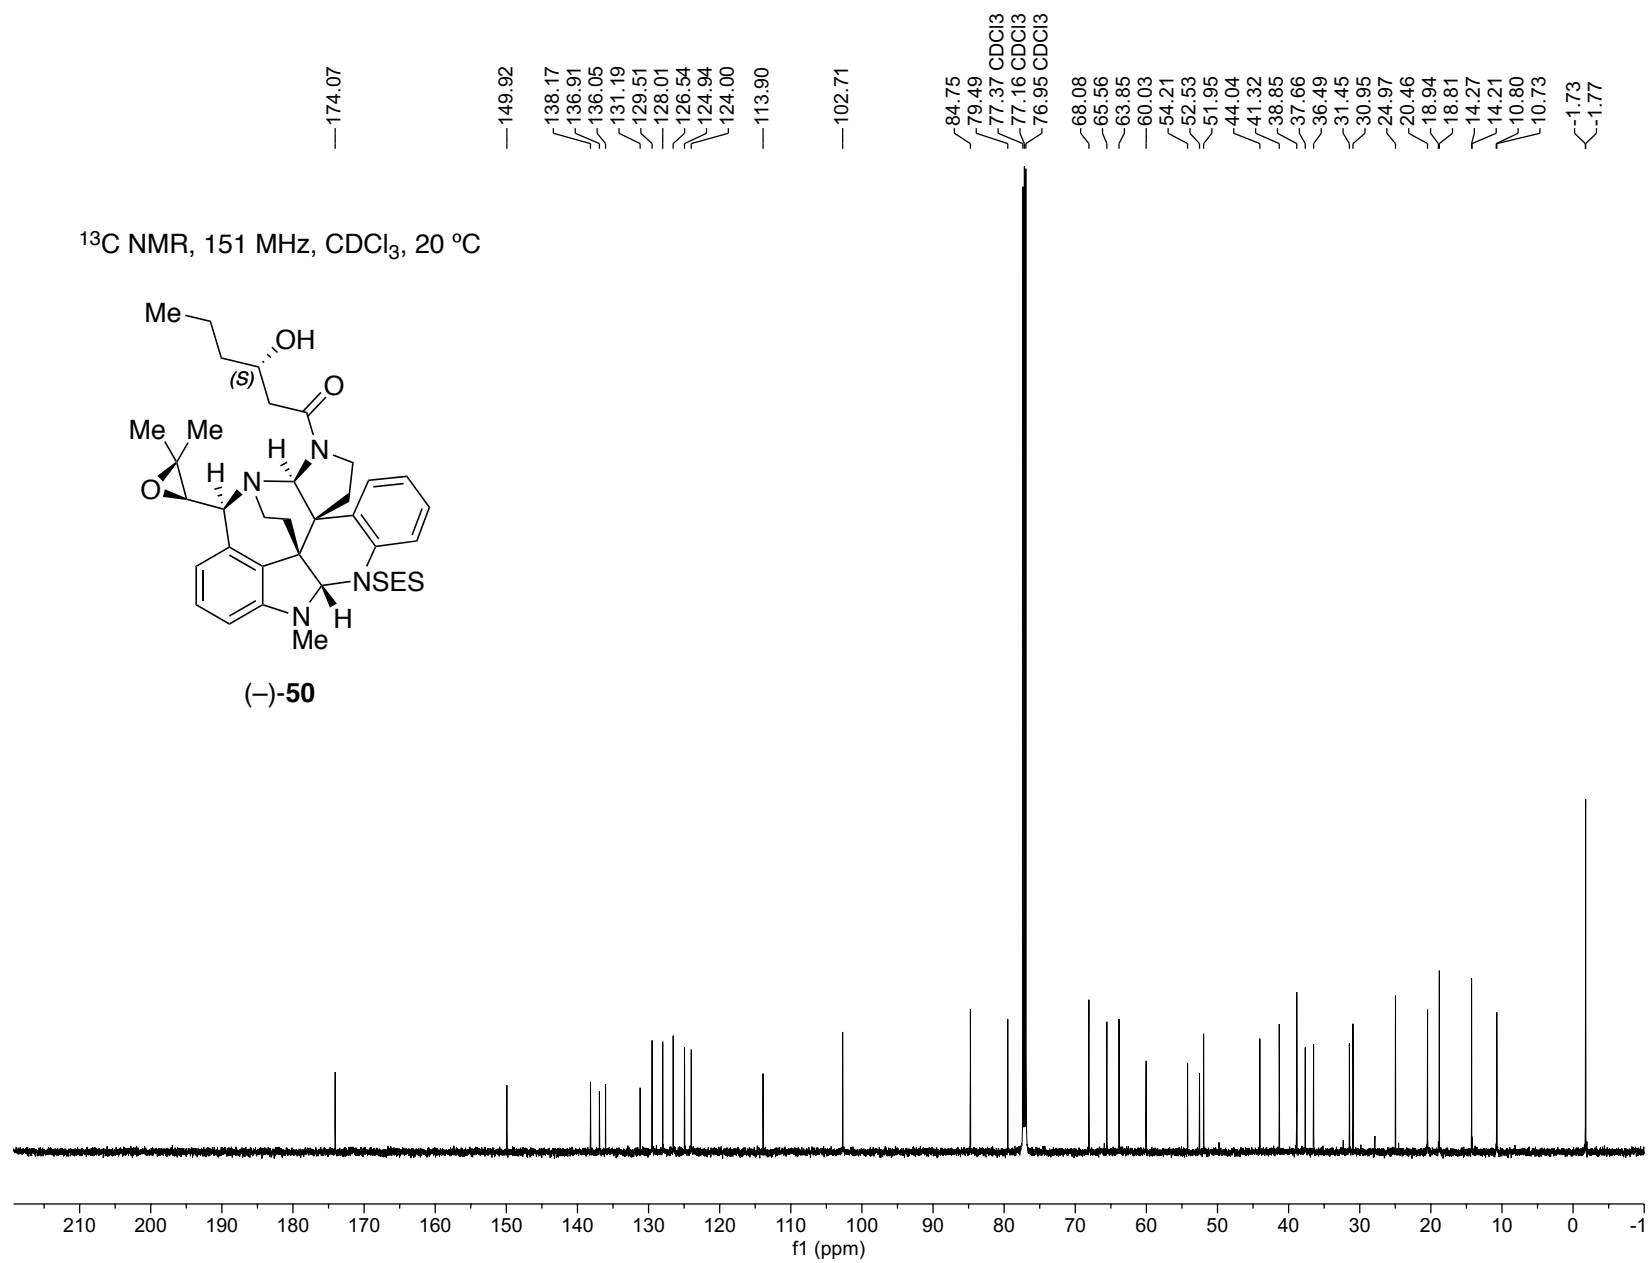

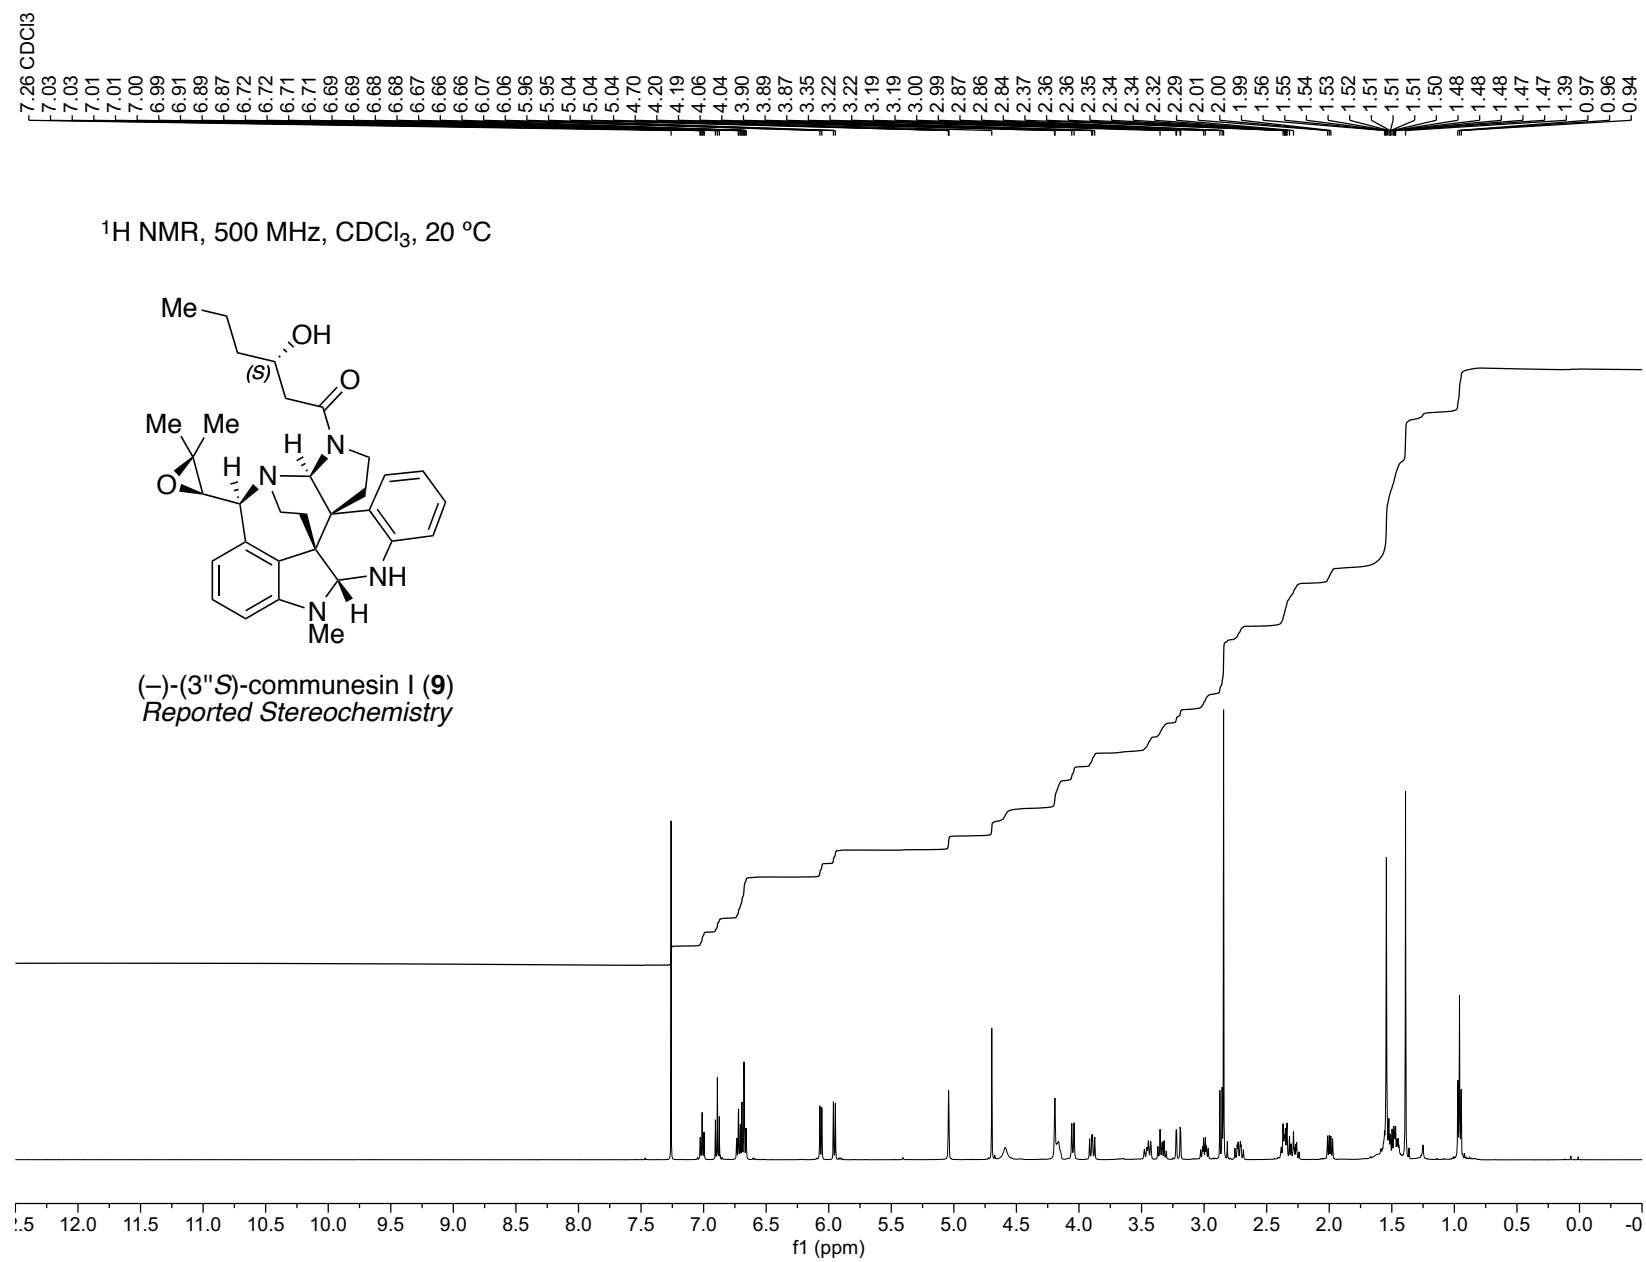

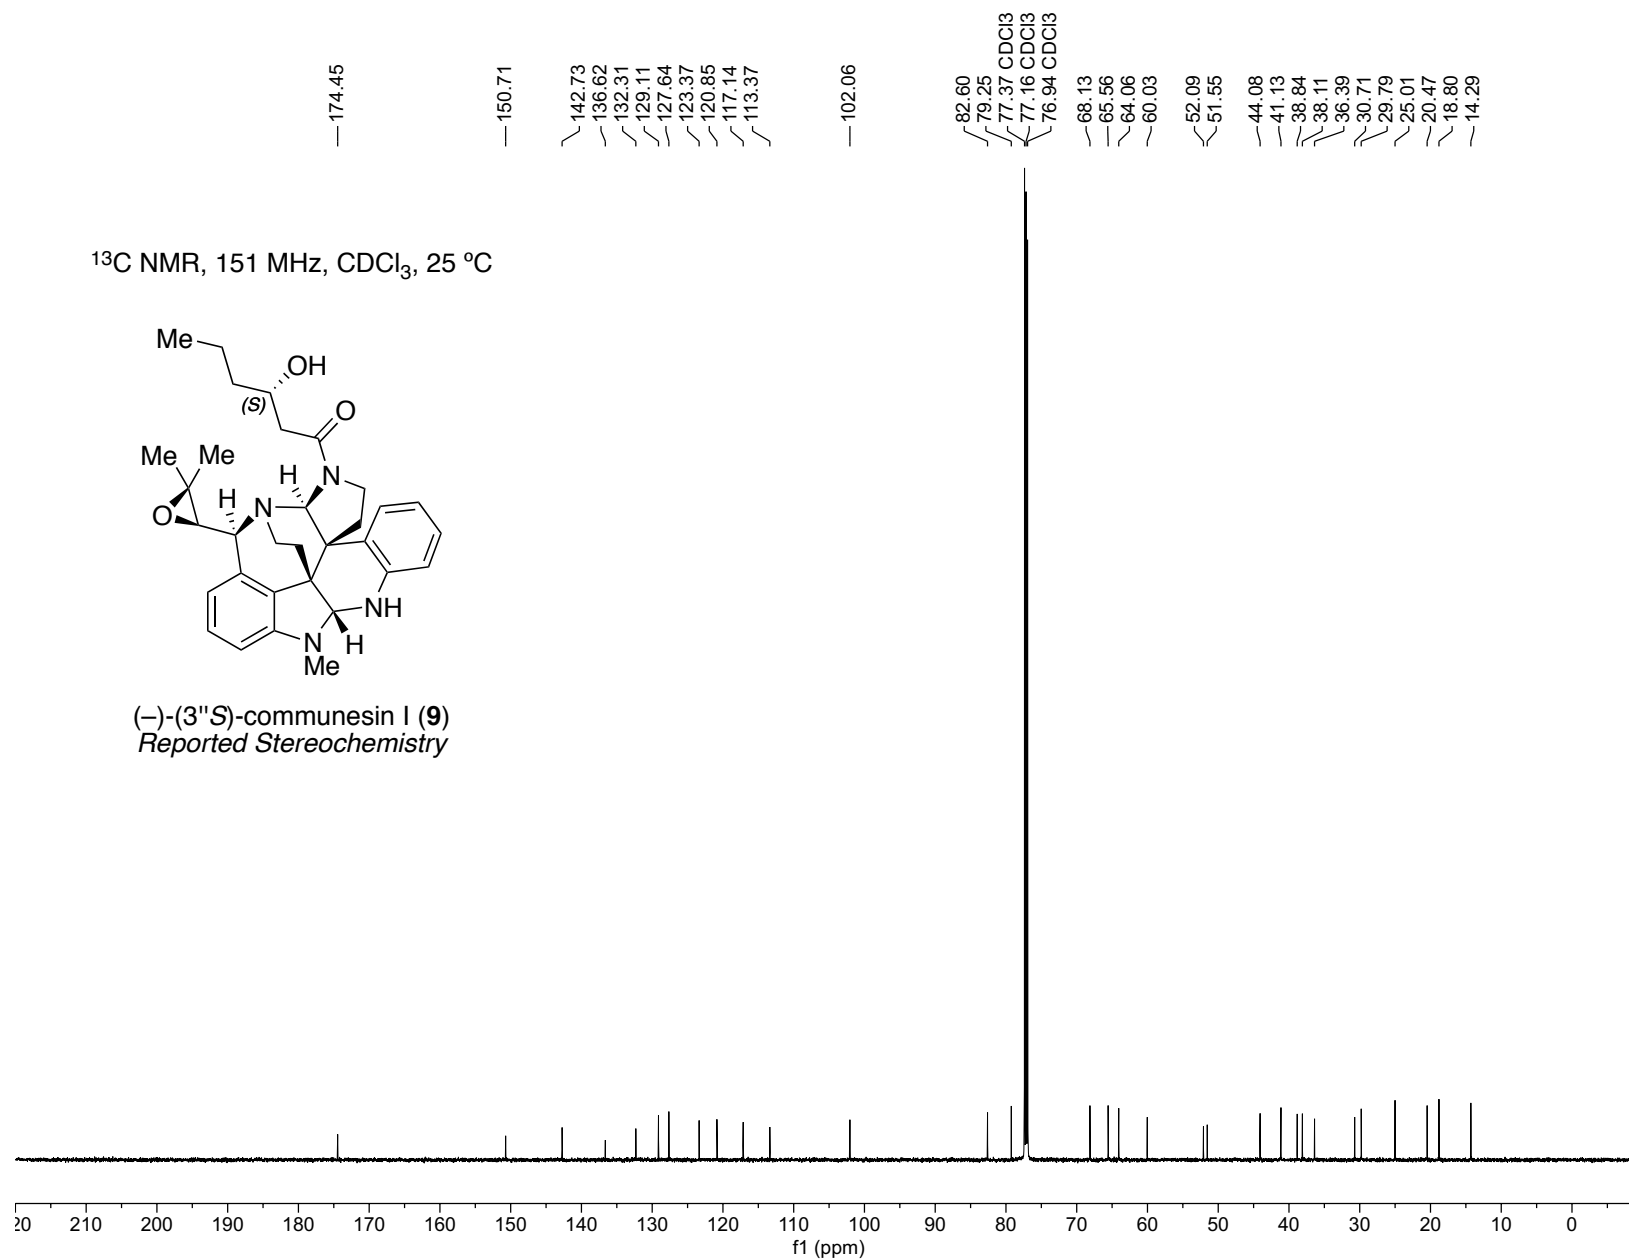

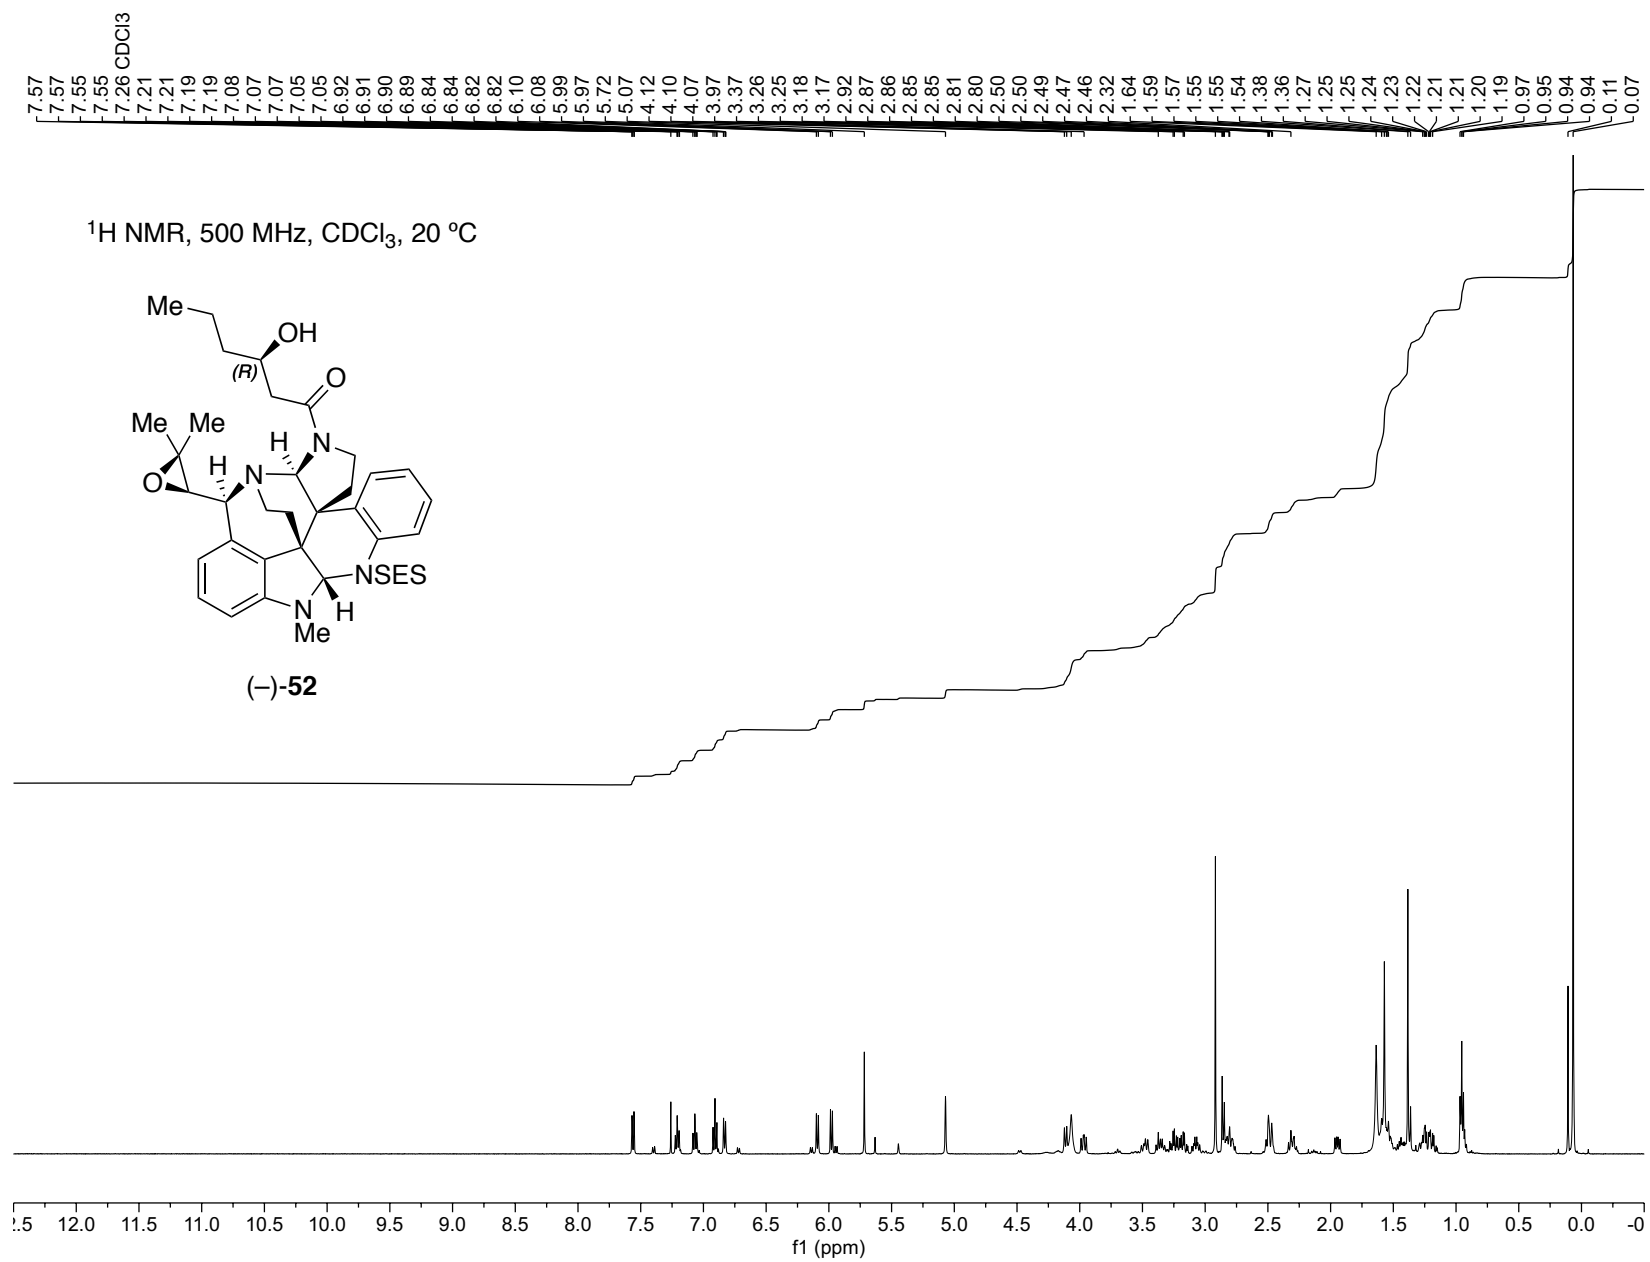



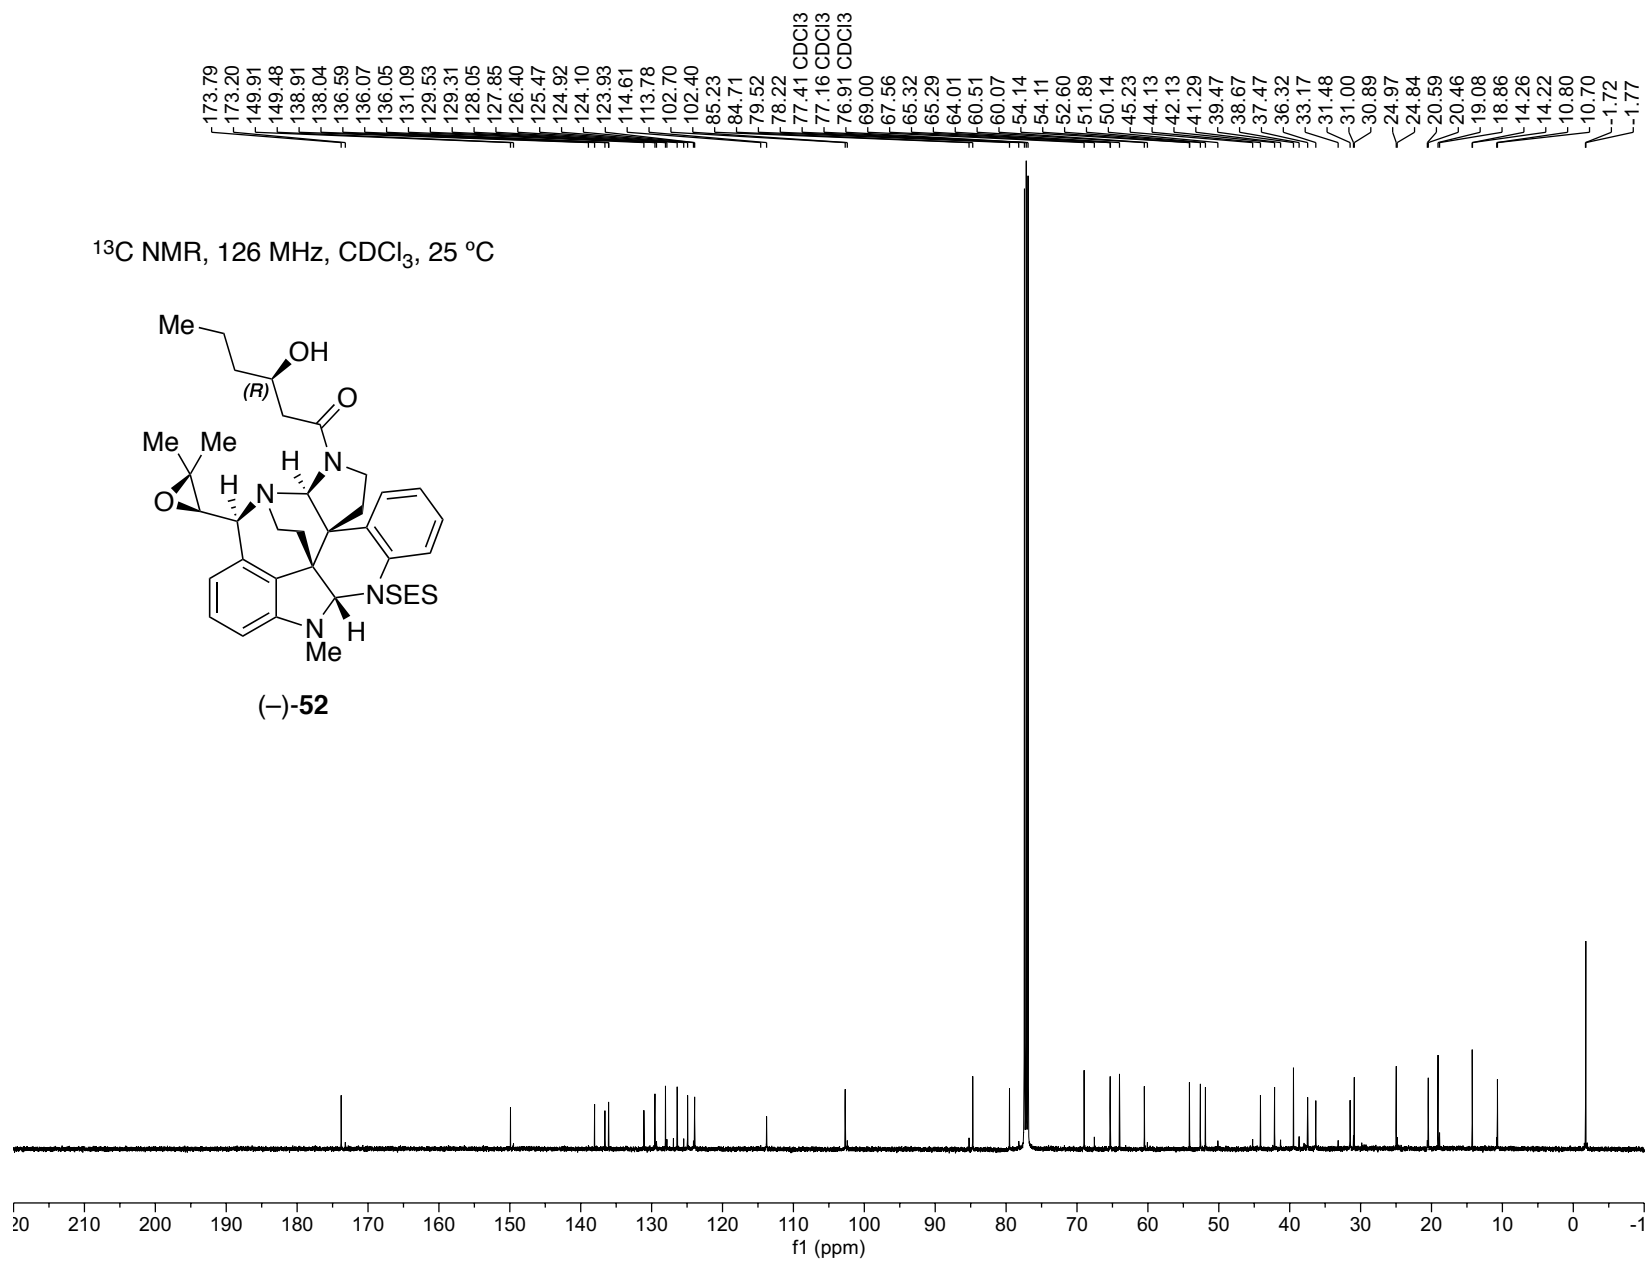

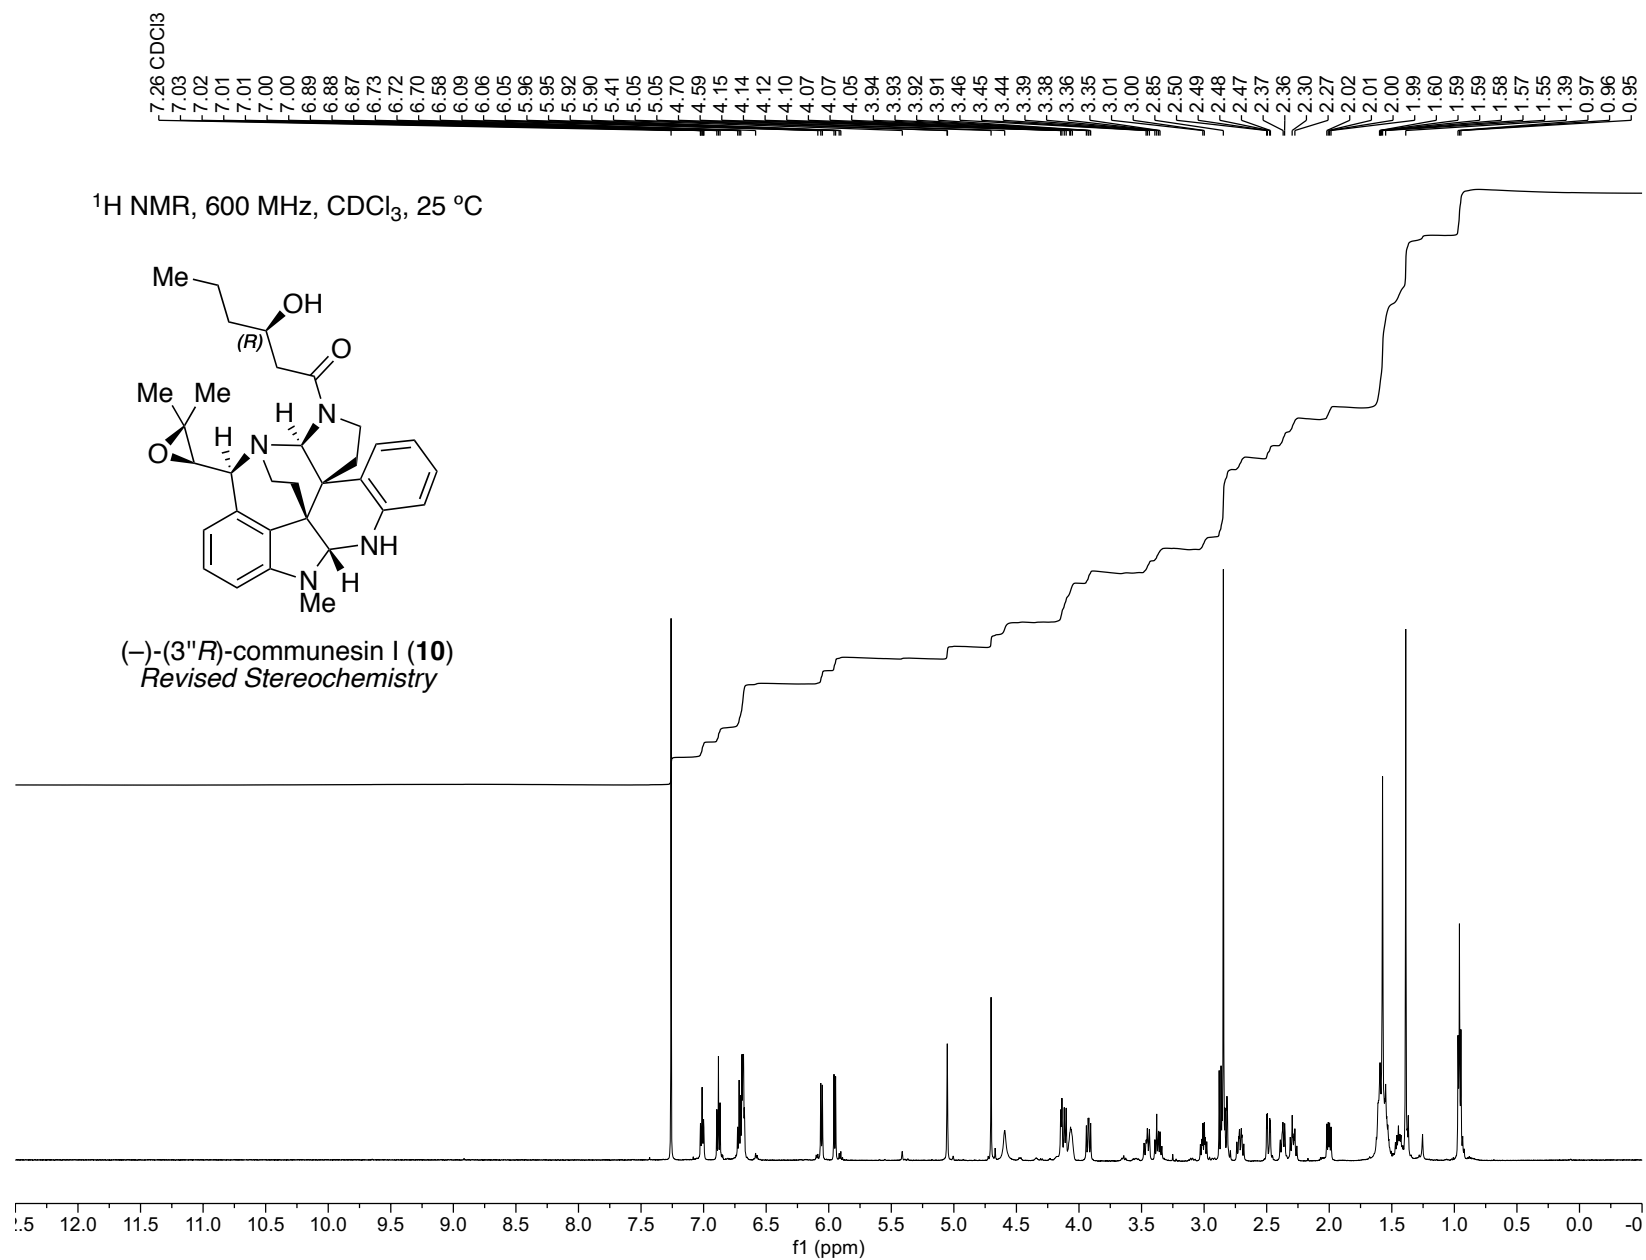



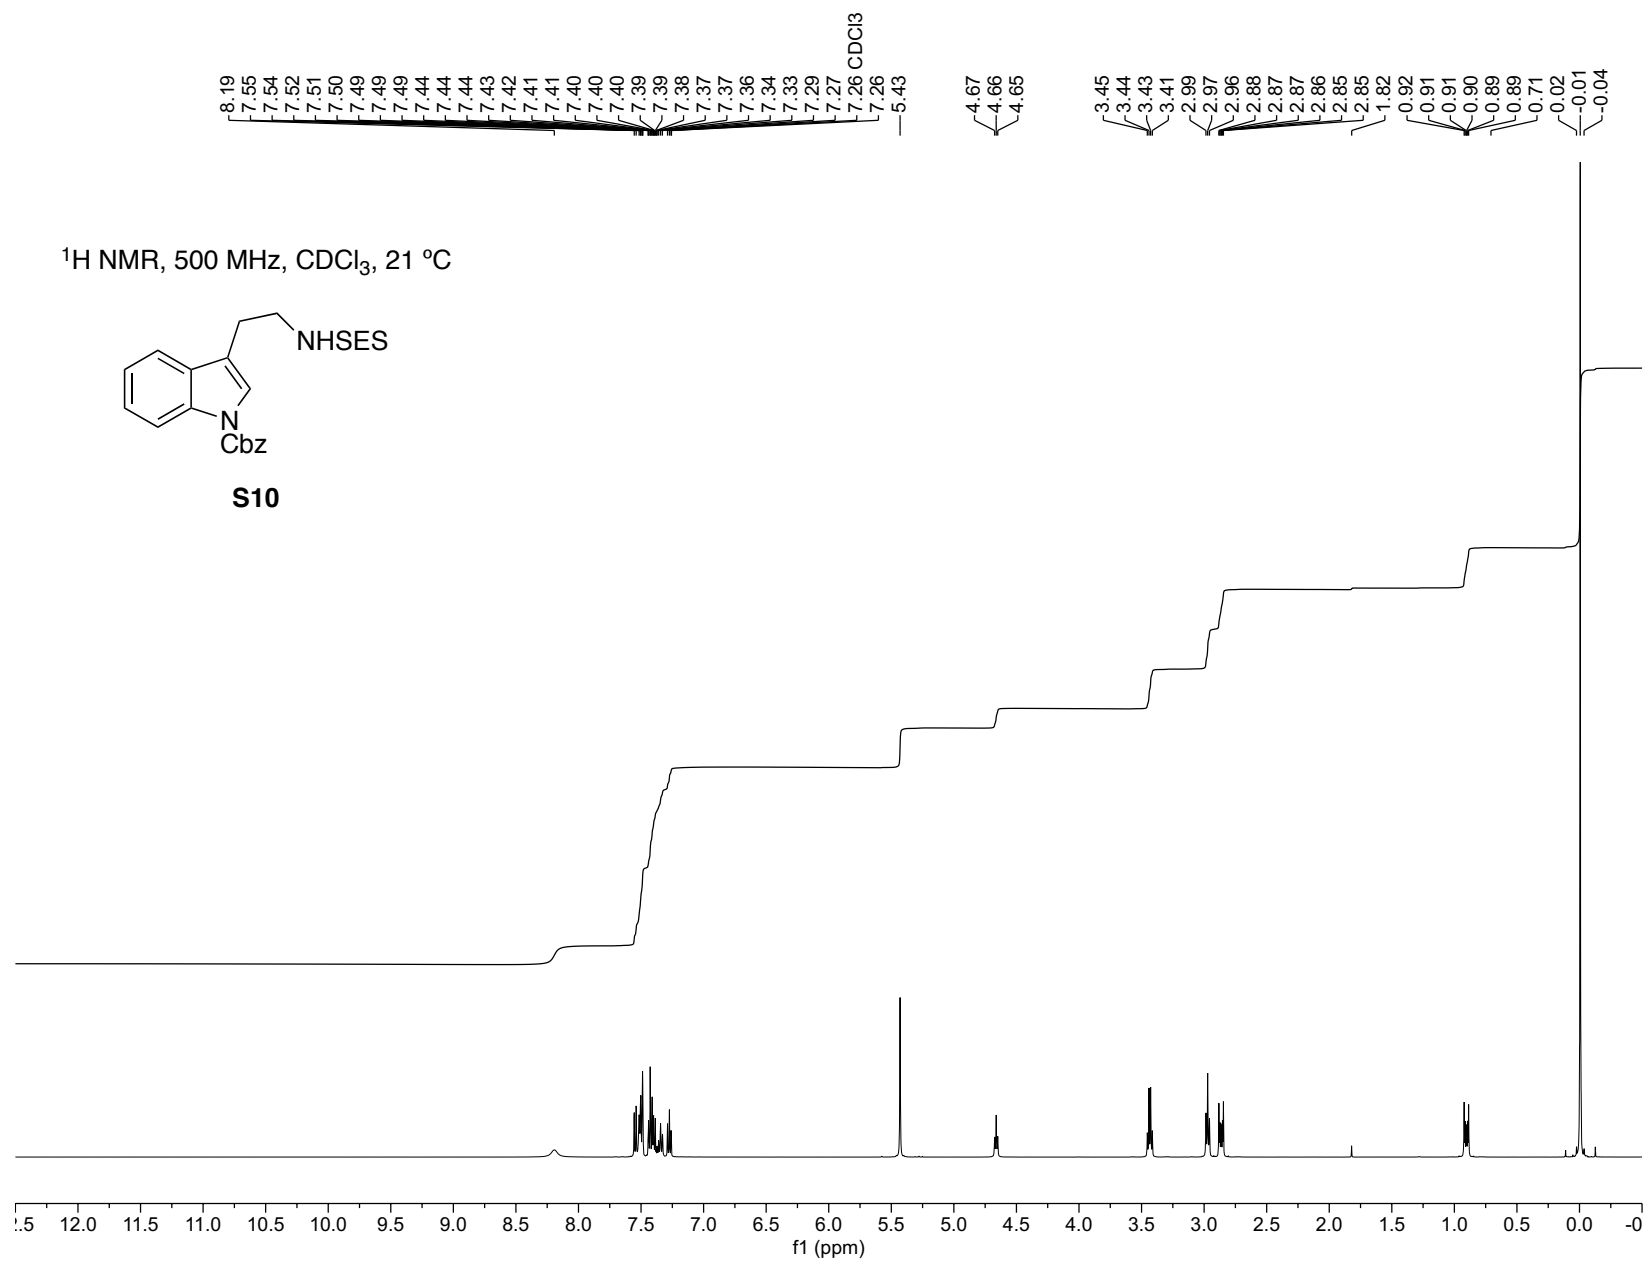

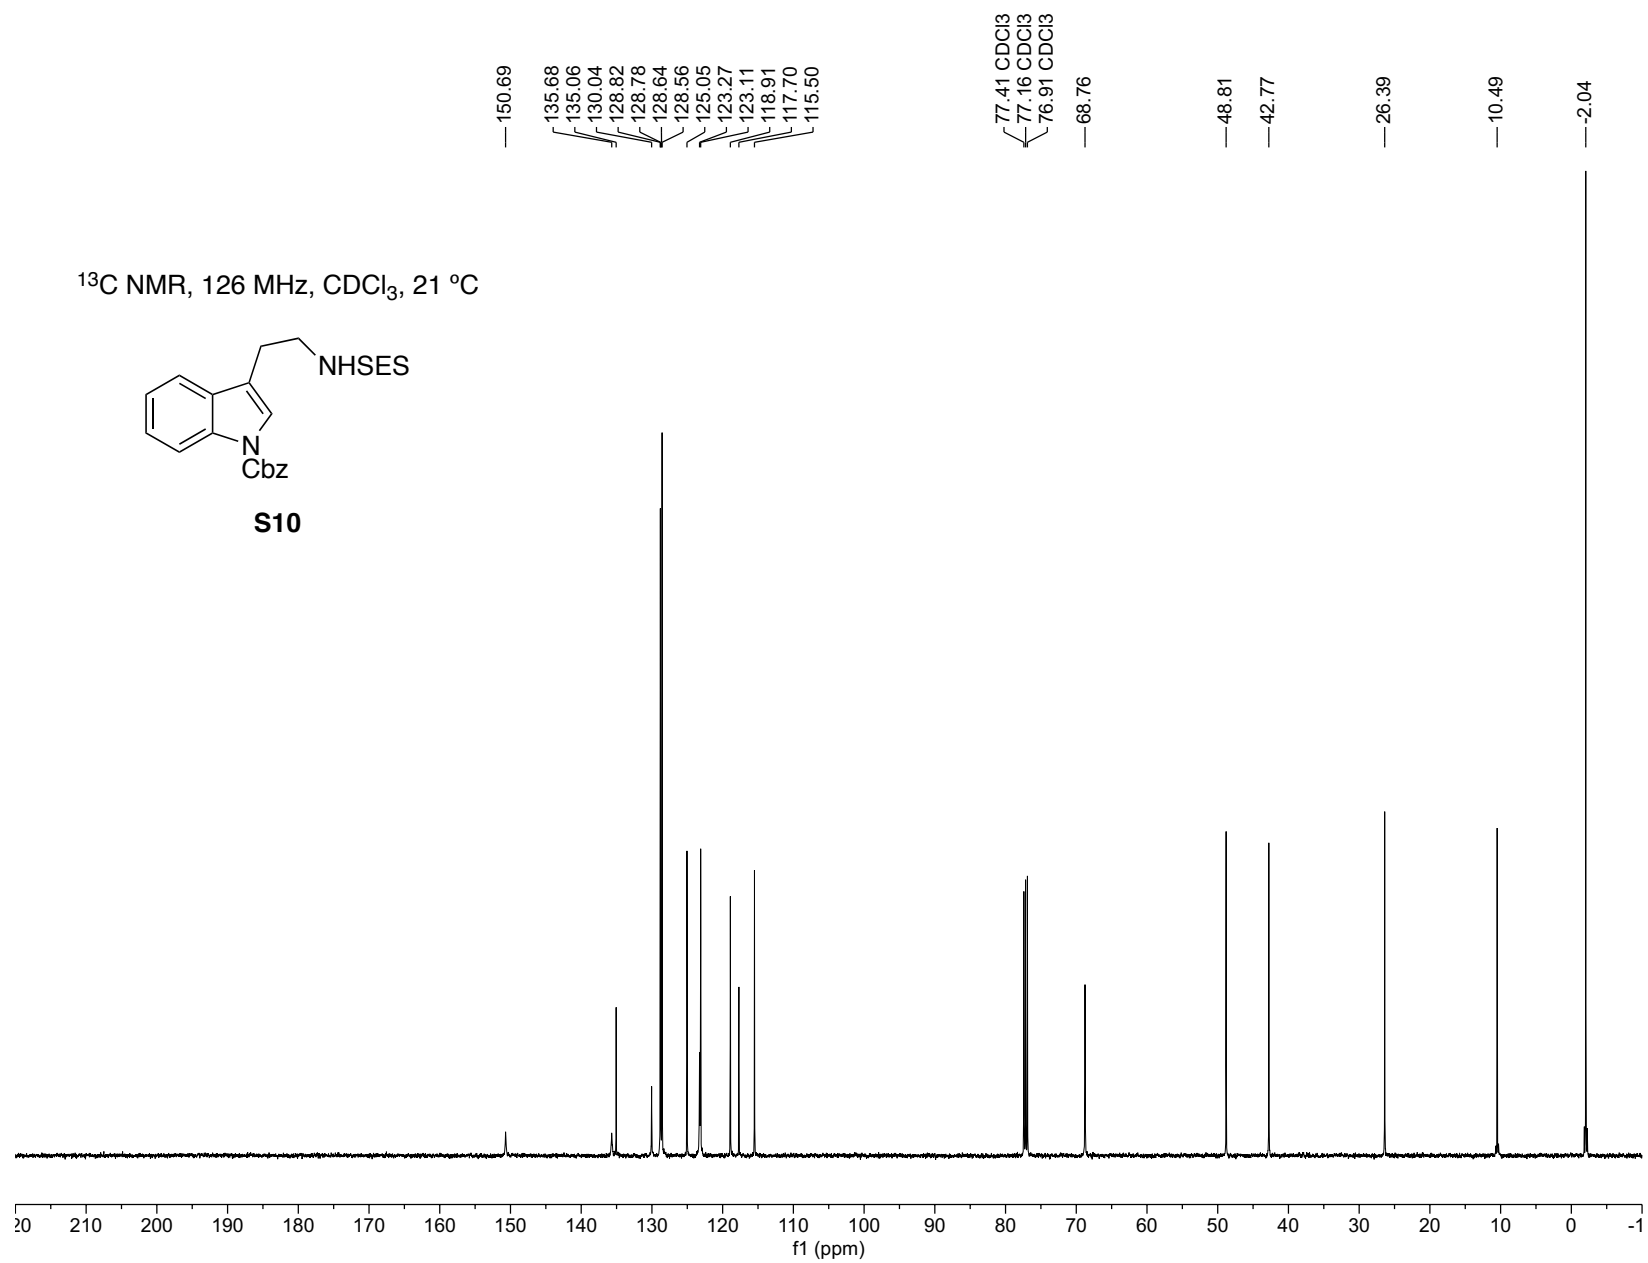

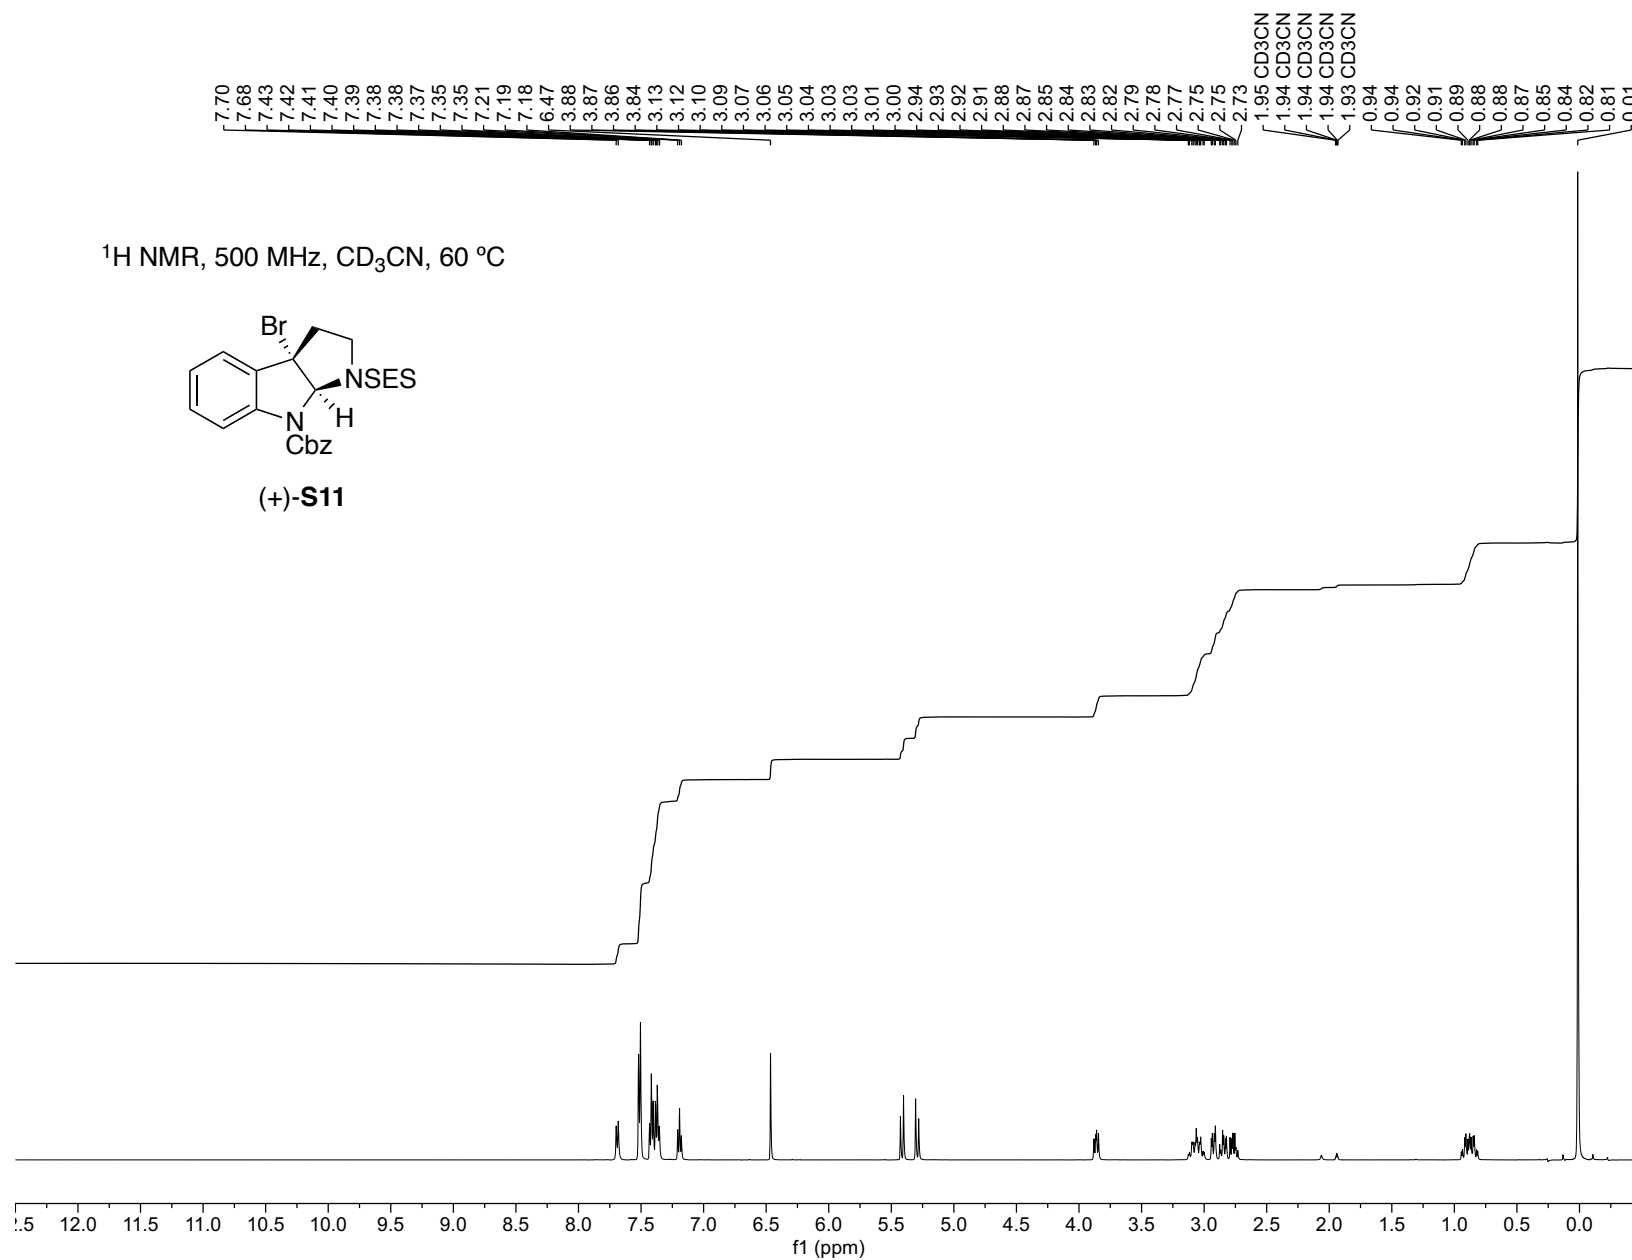

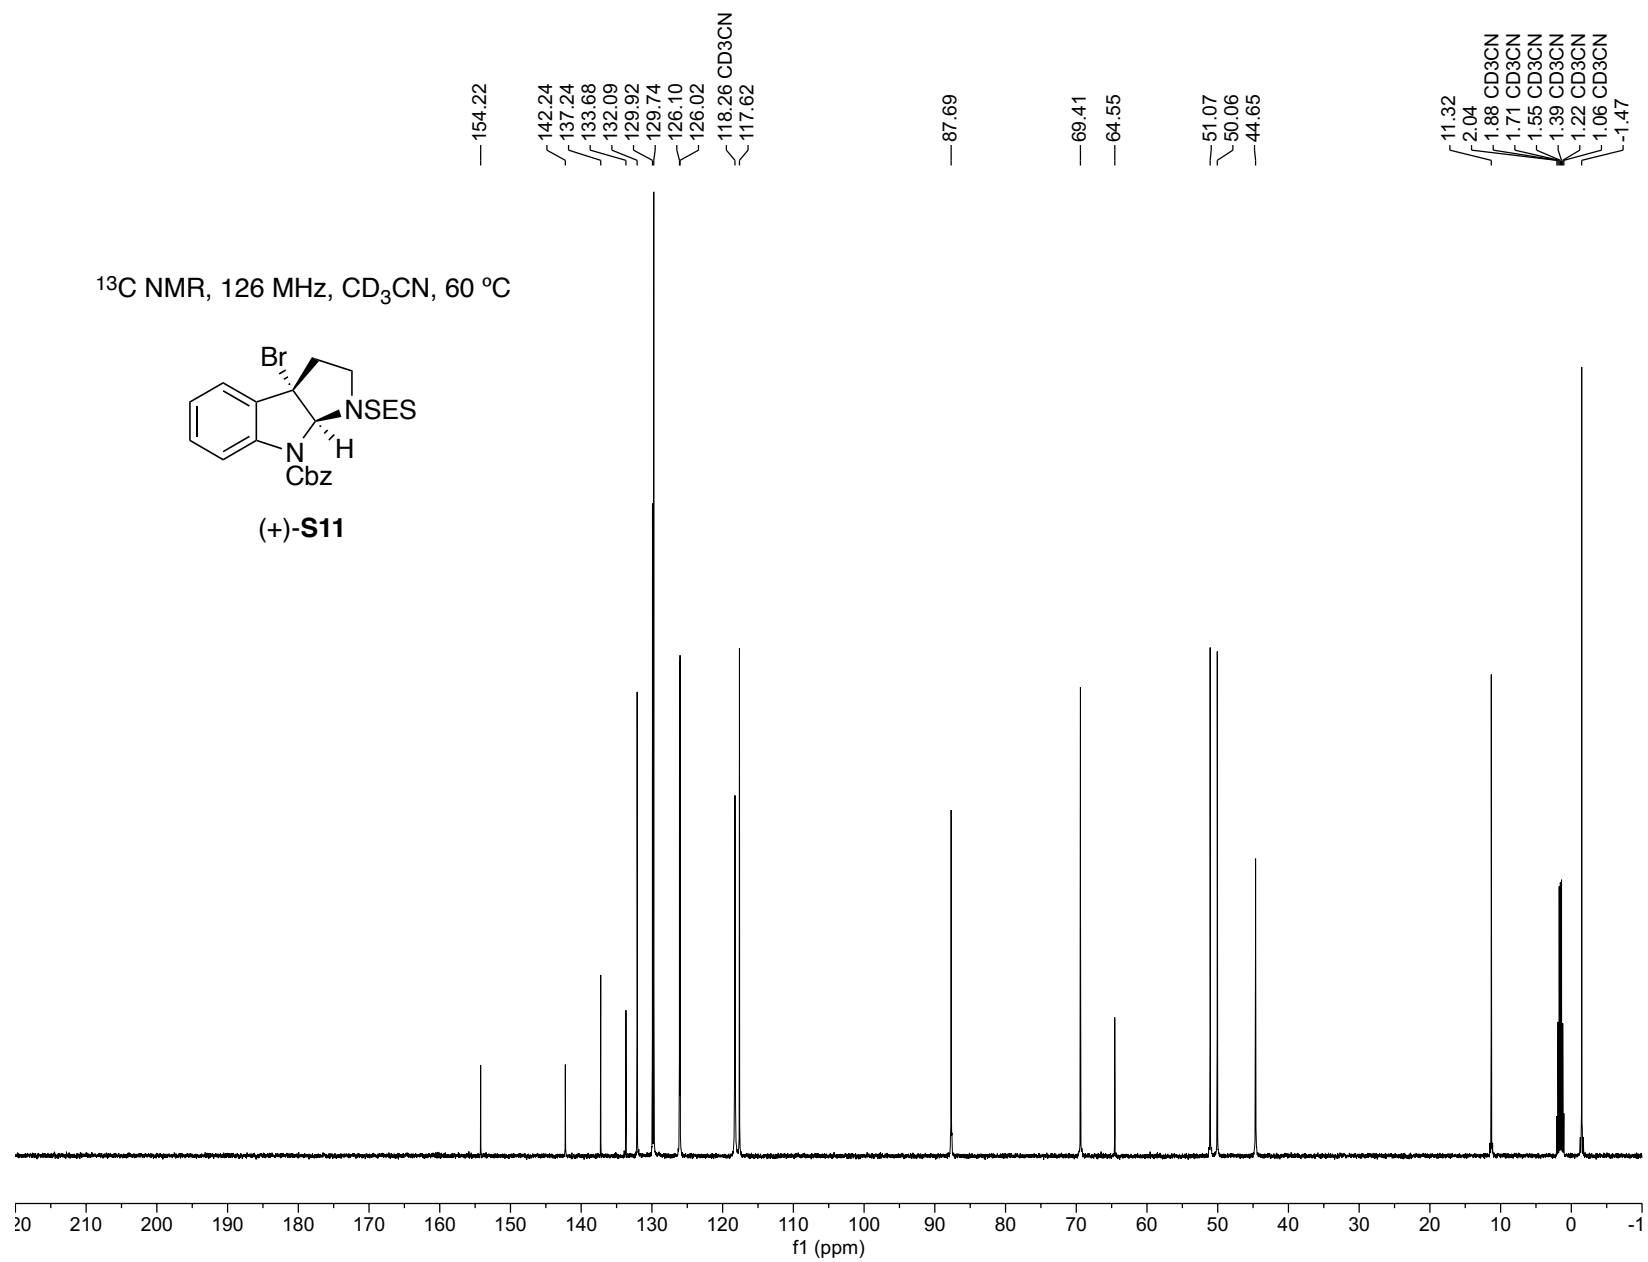

racemate

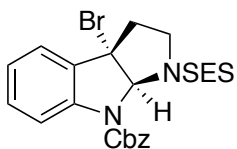

(±)-S11

**HPLC conditions:**  
CHIRALPAK® IA, Lot# IA00CE-PD046  
15% *i*-PrOH in hexanes  
1.0 mL/min  
 $\lambda = 220$  nm

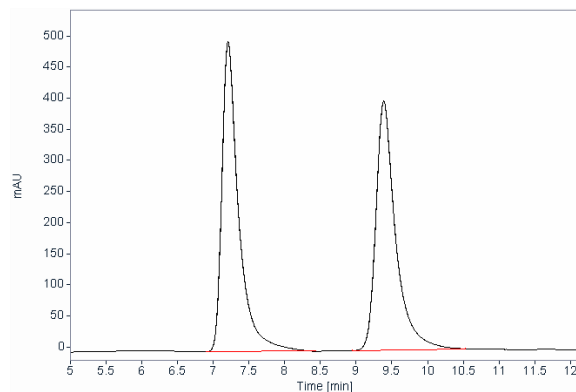

Signal: DAD1 B, Sig=220,16 Ref=360,100

| Ret. Time (min) | Area%   |
|-----------------|---------|
| 7.204           | 51.3217 |
| 9.381           | 48.6783 |

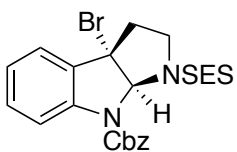

(+)-S11

**HPLC conditions:**  
CHIRALPAK® IA, Lot# IA00CE-PD046  
15% *i*-PrOH in hexanes  
1.0 mL/min  
 $\lambda = 220$  nm

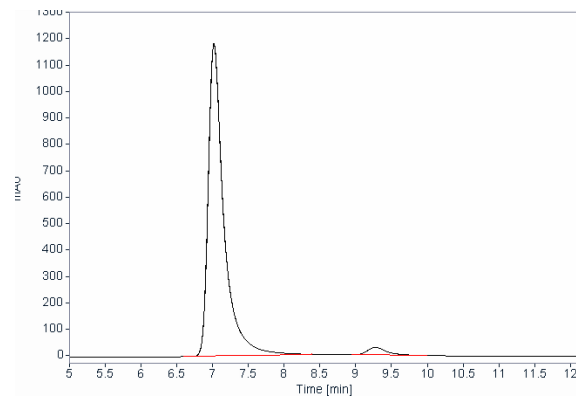

Signal: DAD1 B, Sig=220,16 Ref=360,100

| Ret. Time (min) | Area%   |
|-----------------|---------|
| 7.016           | 97.0436 |
| 9.267           | 2.9564  |



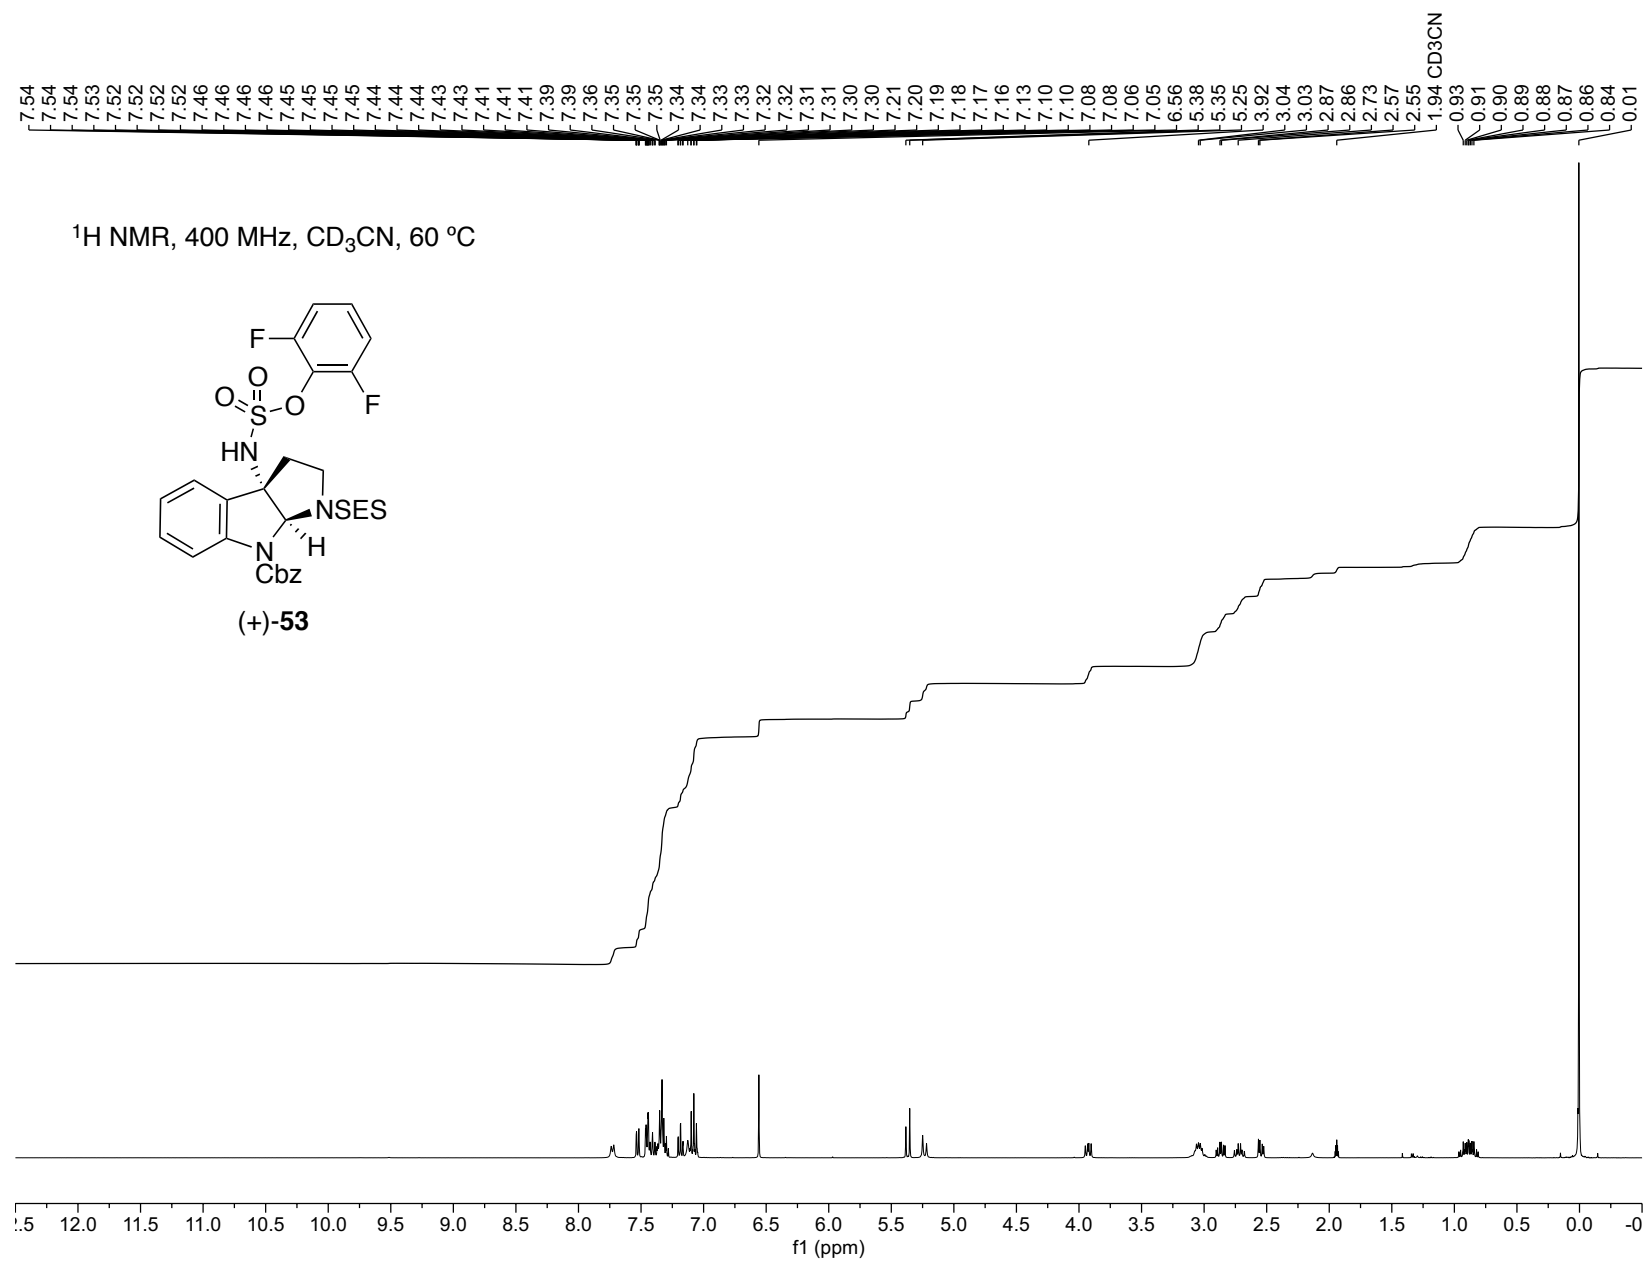

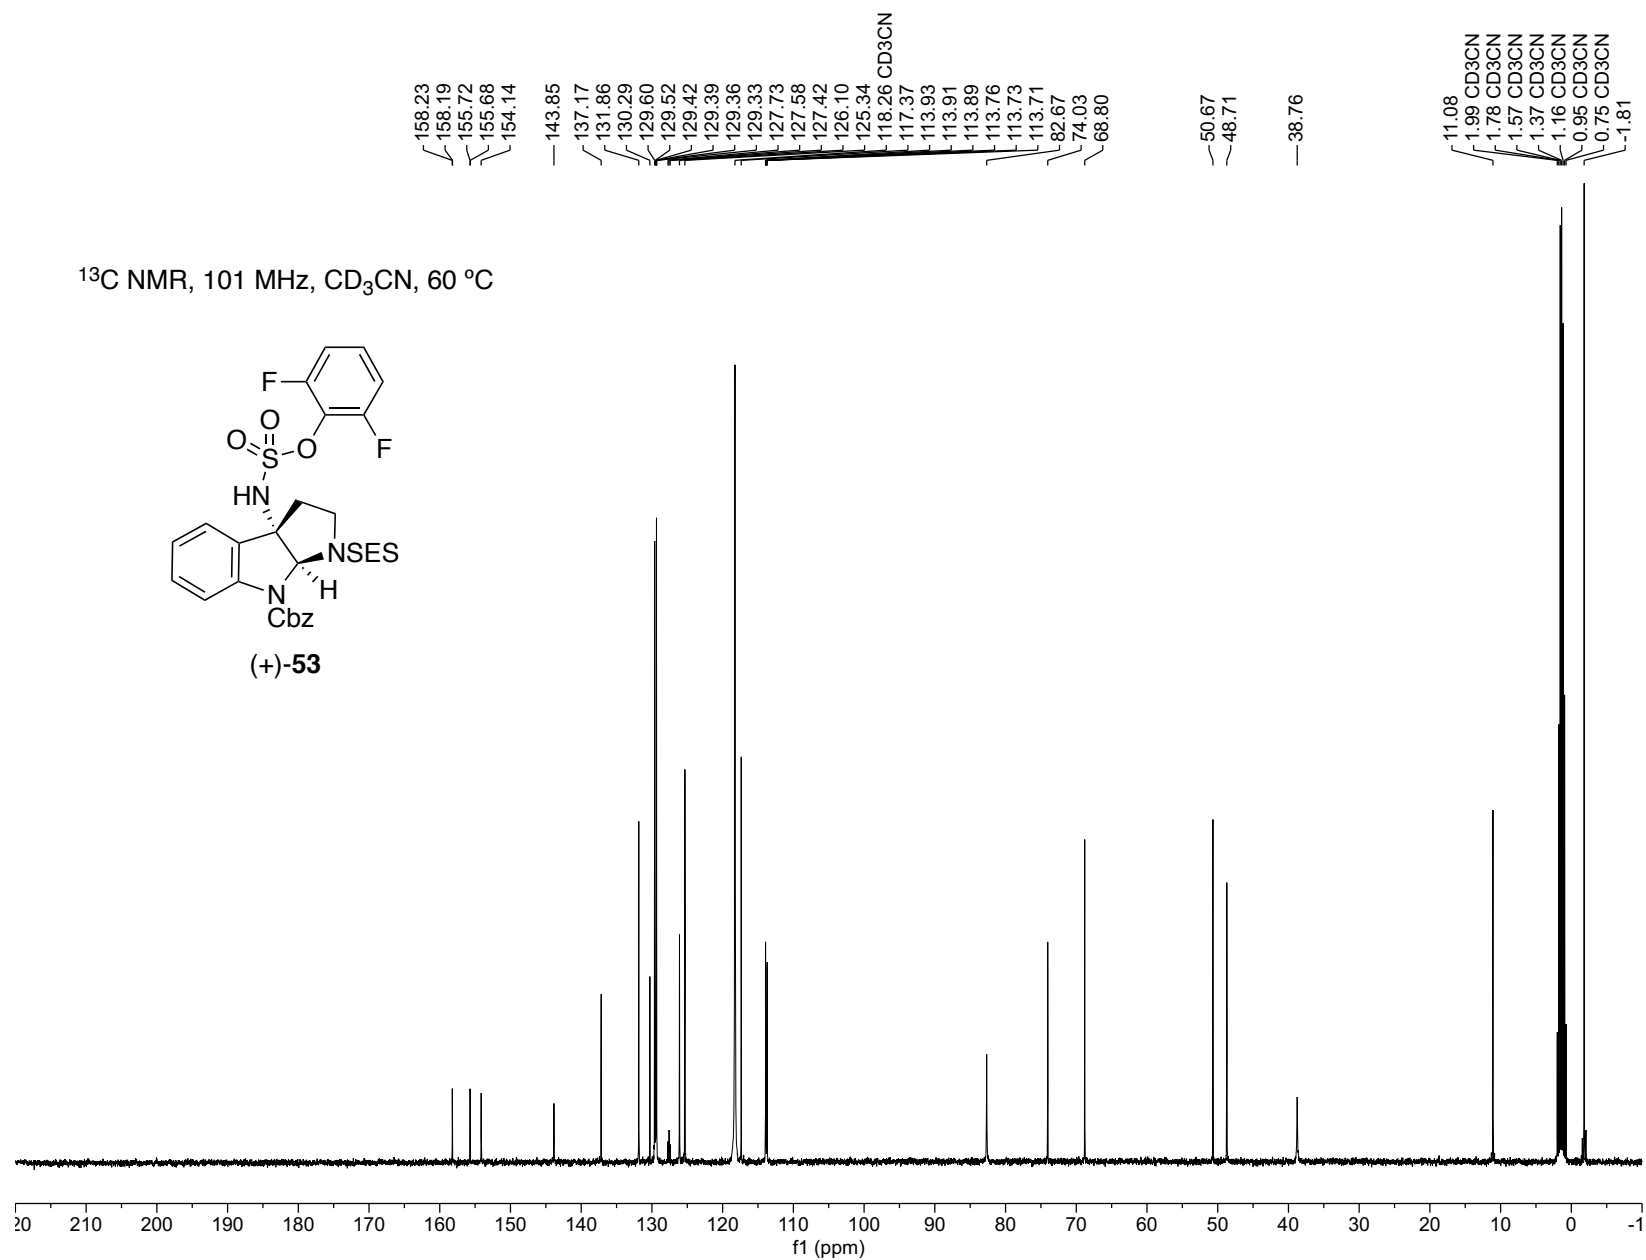

$^{19}\text{F}$  NMR, 376 MHz,  $\text{CD}_3\text{CN}$ , 25 °C

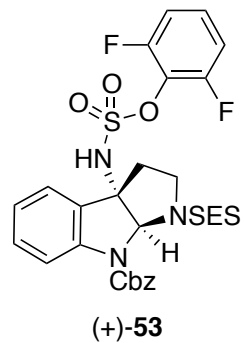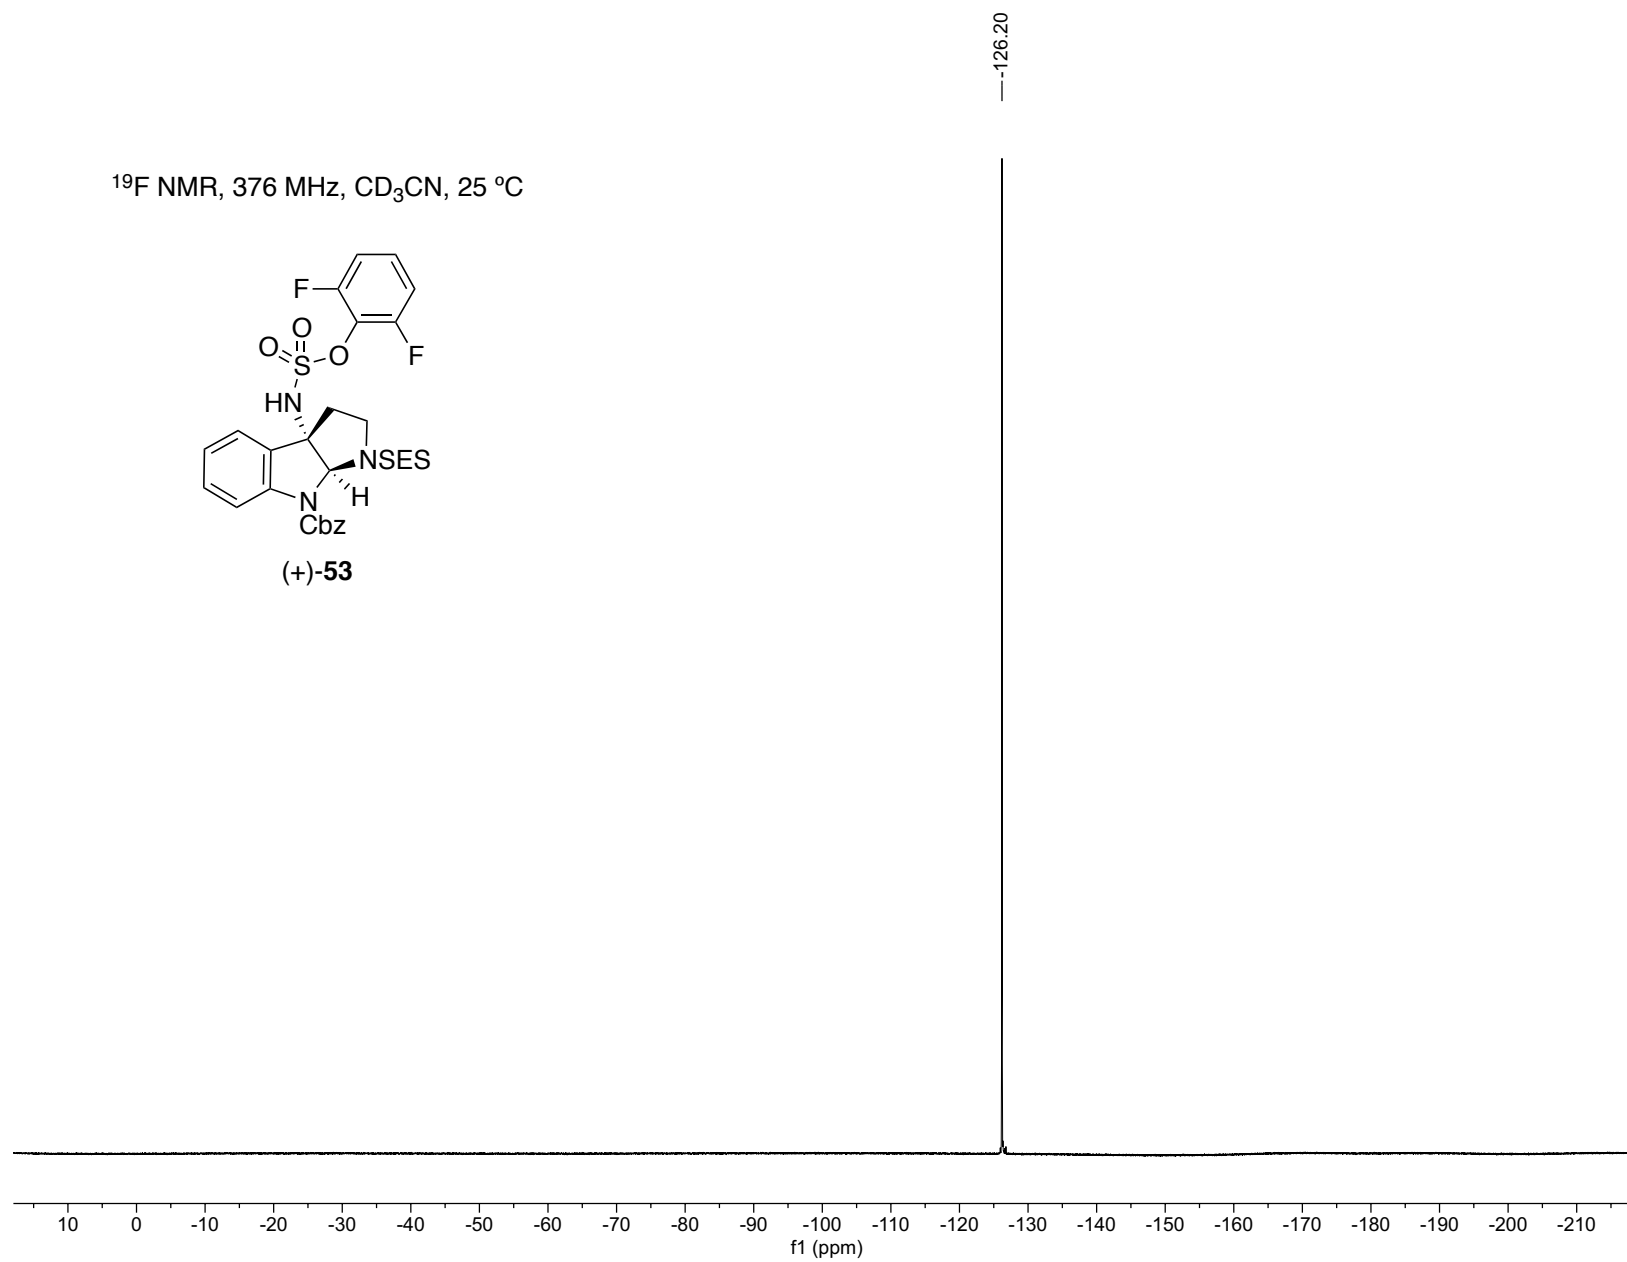

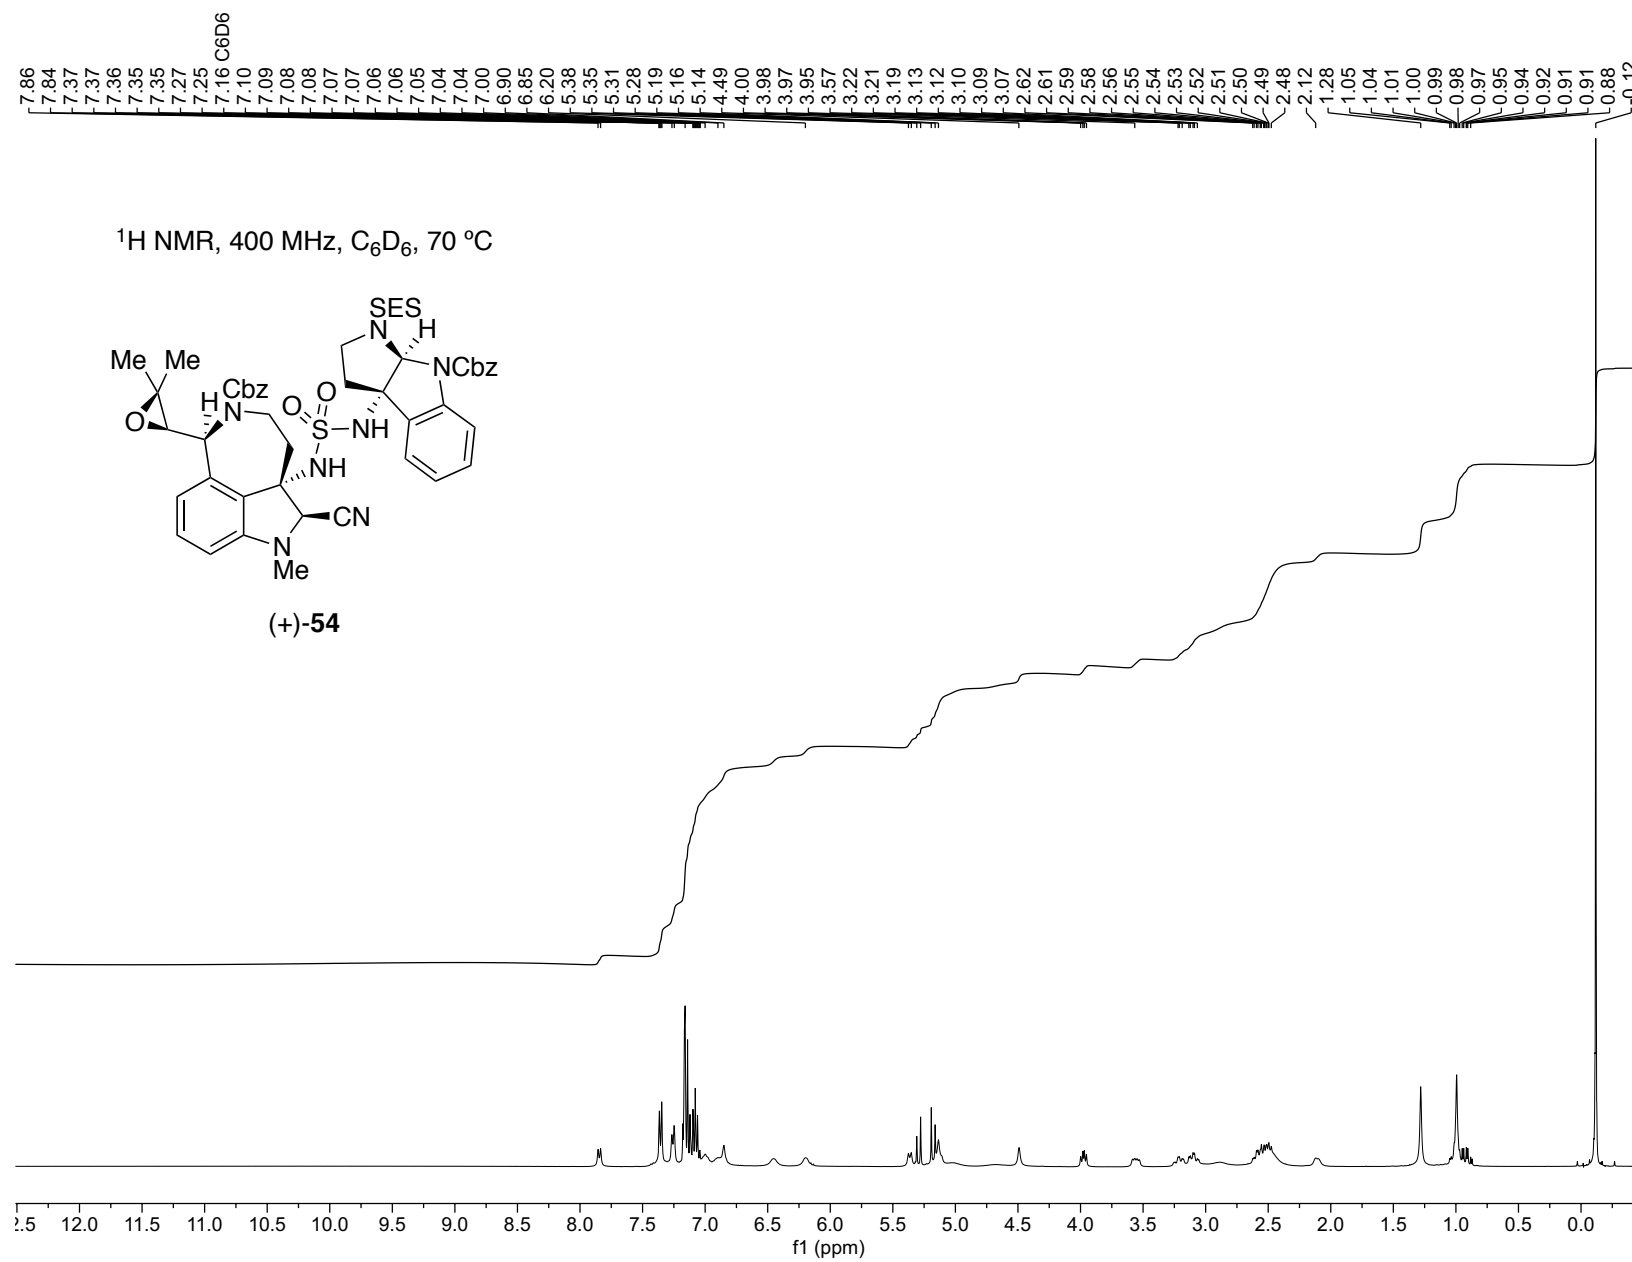

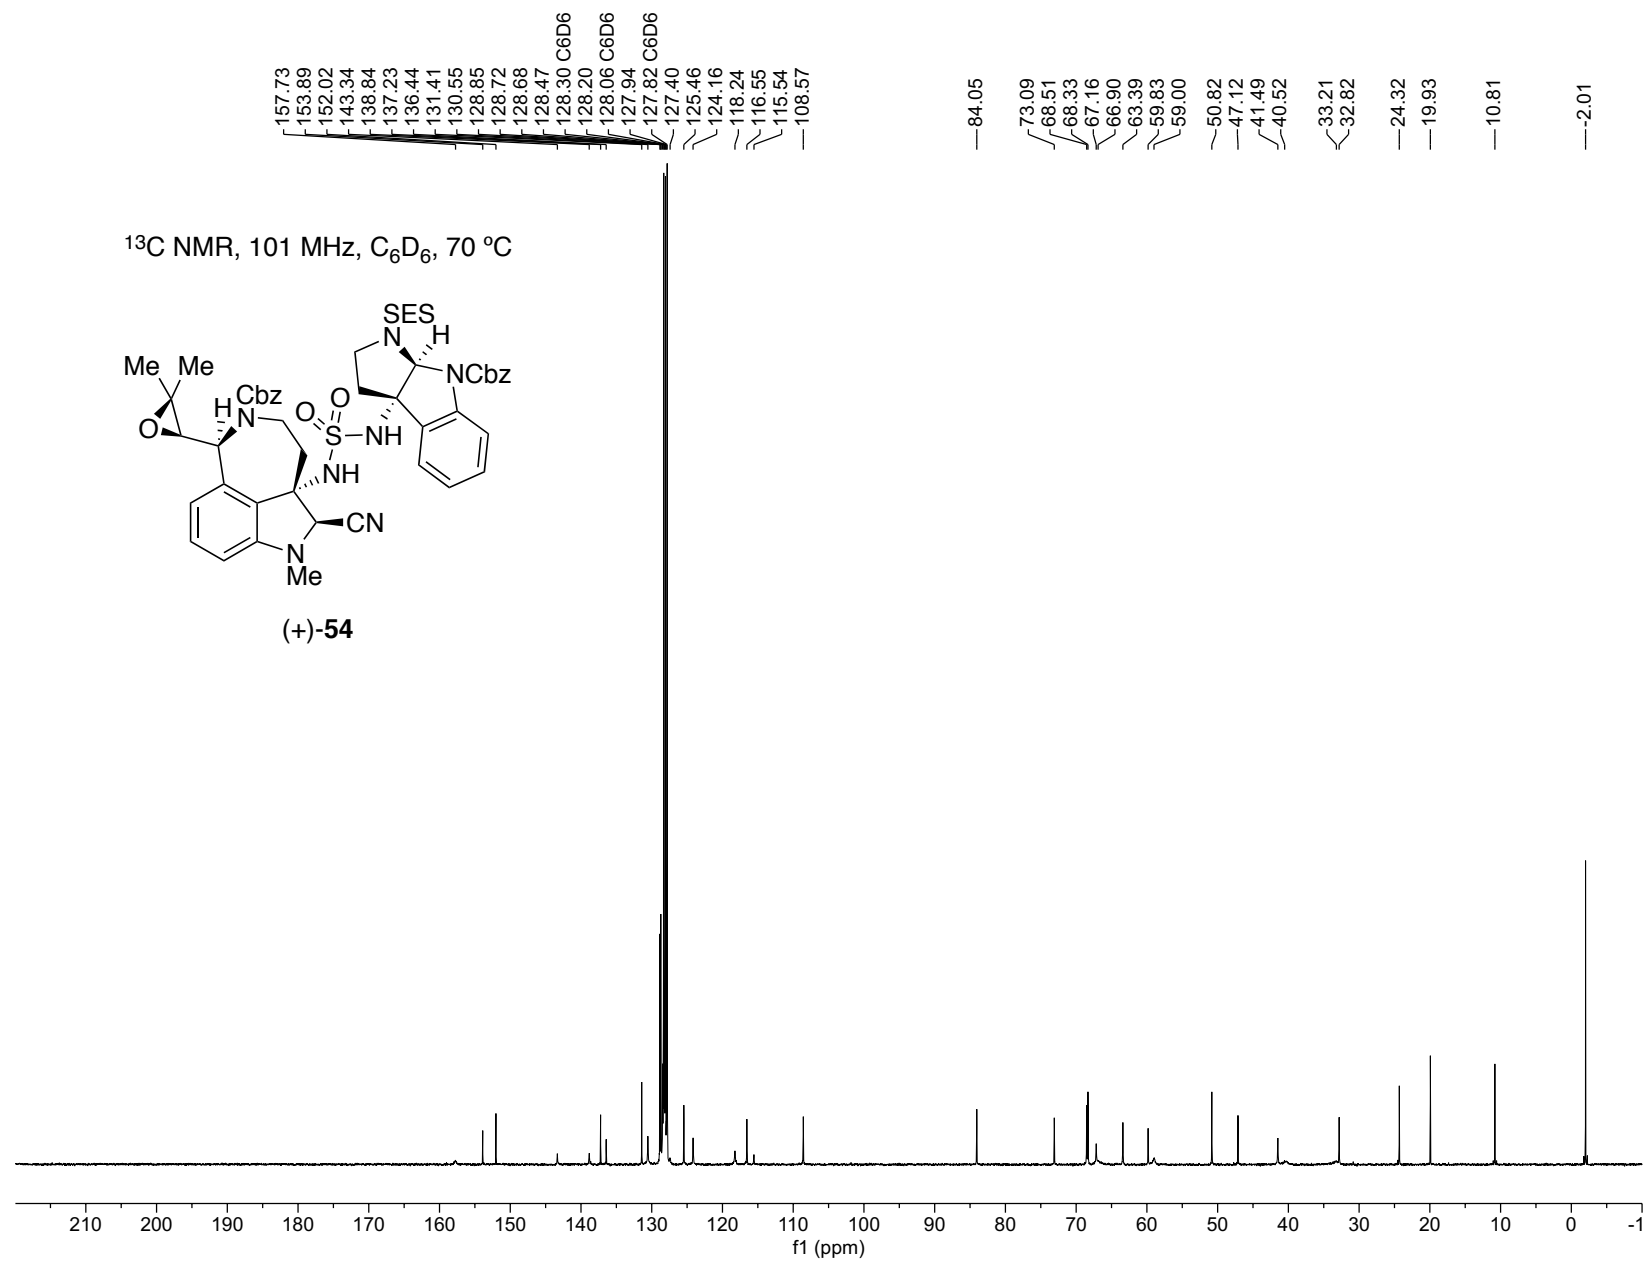

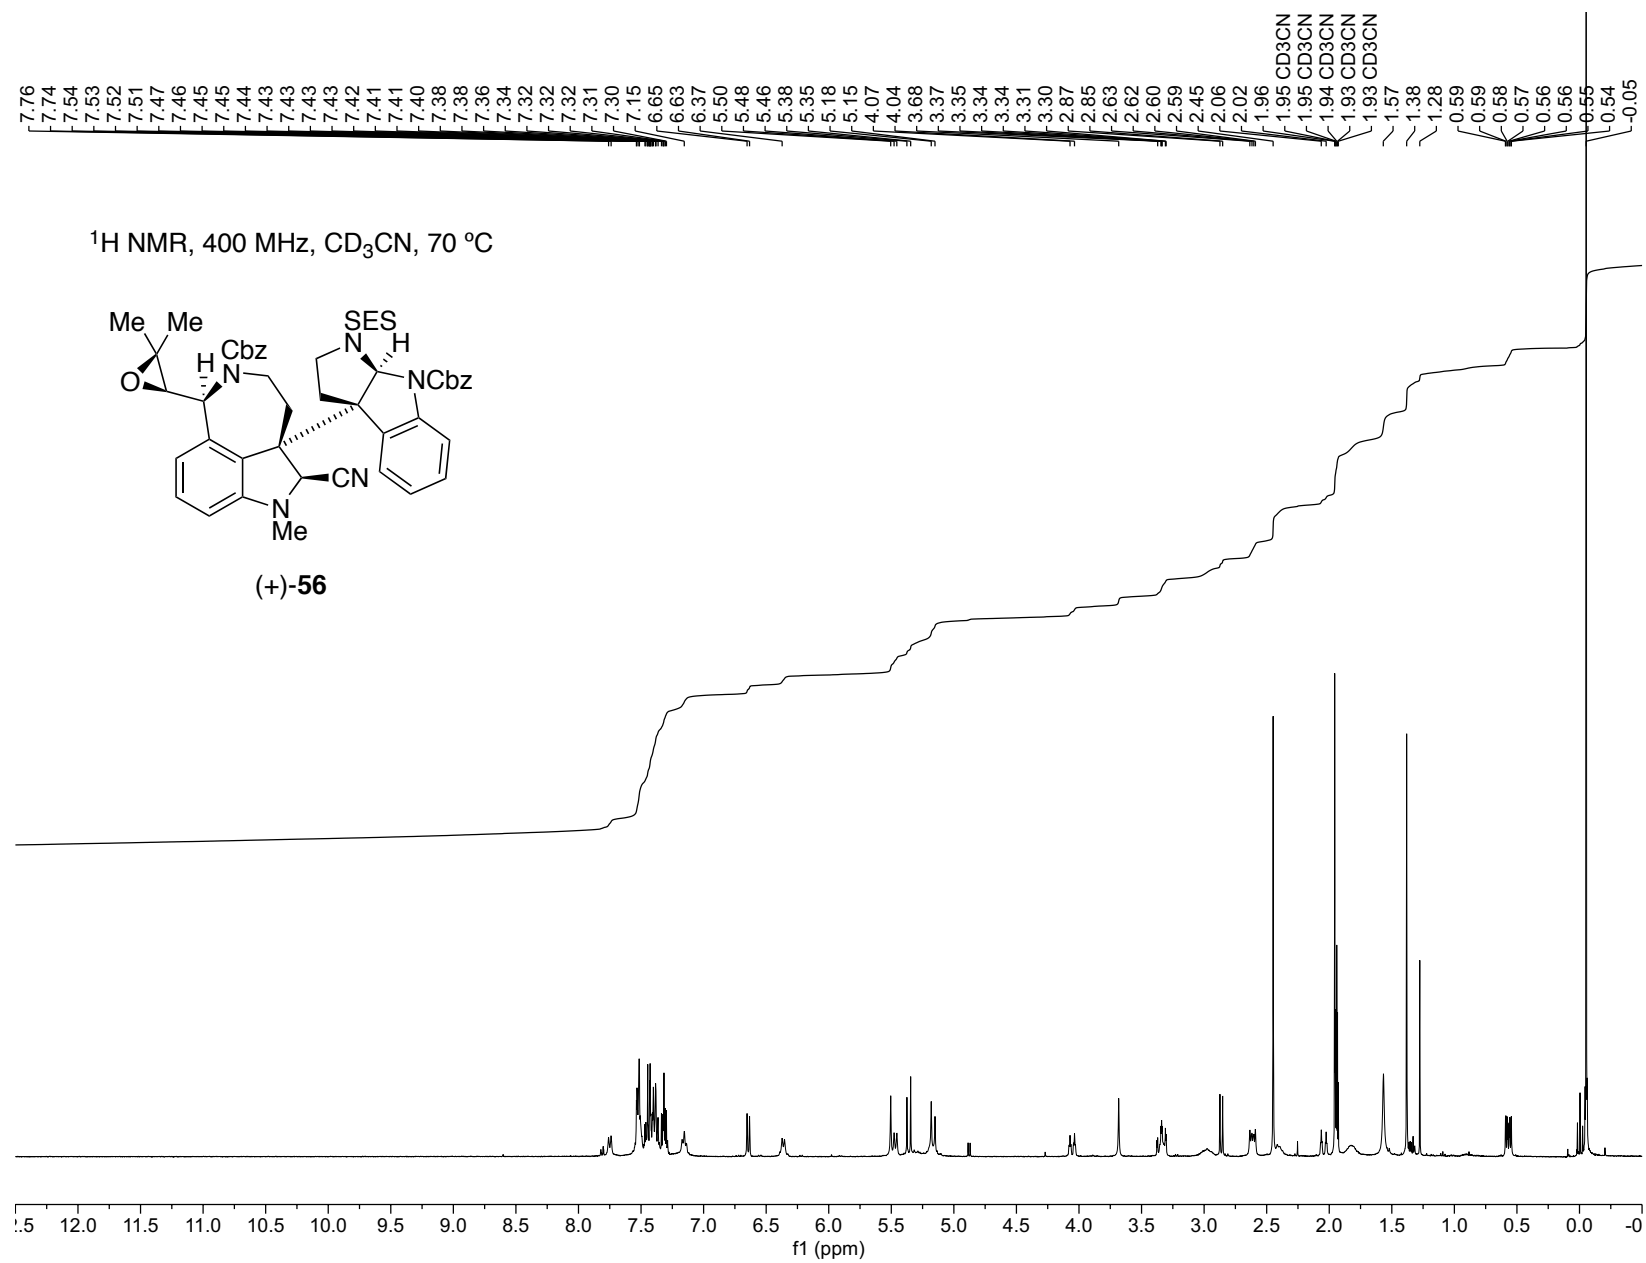



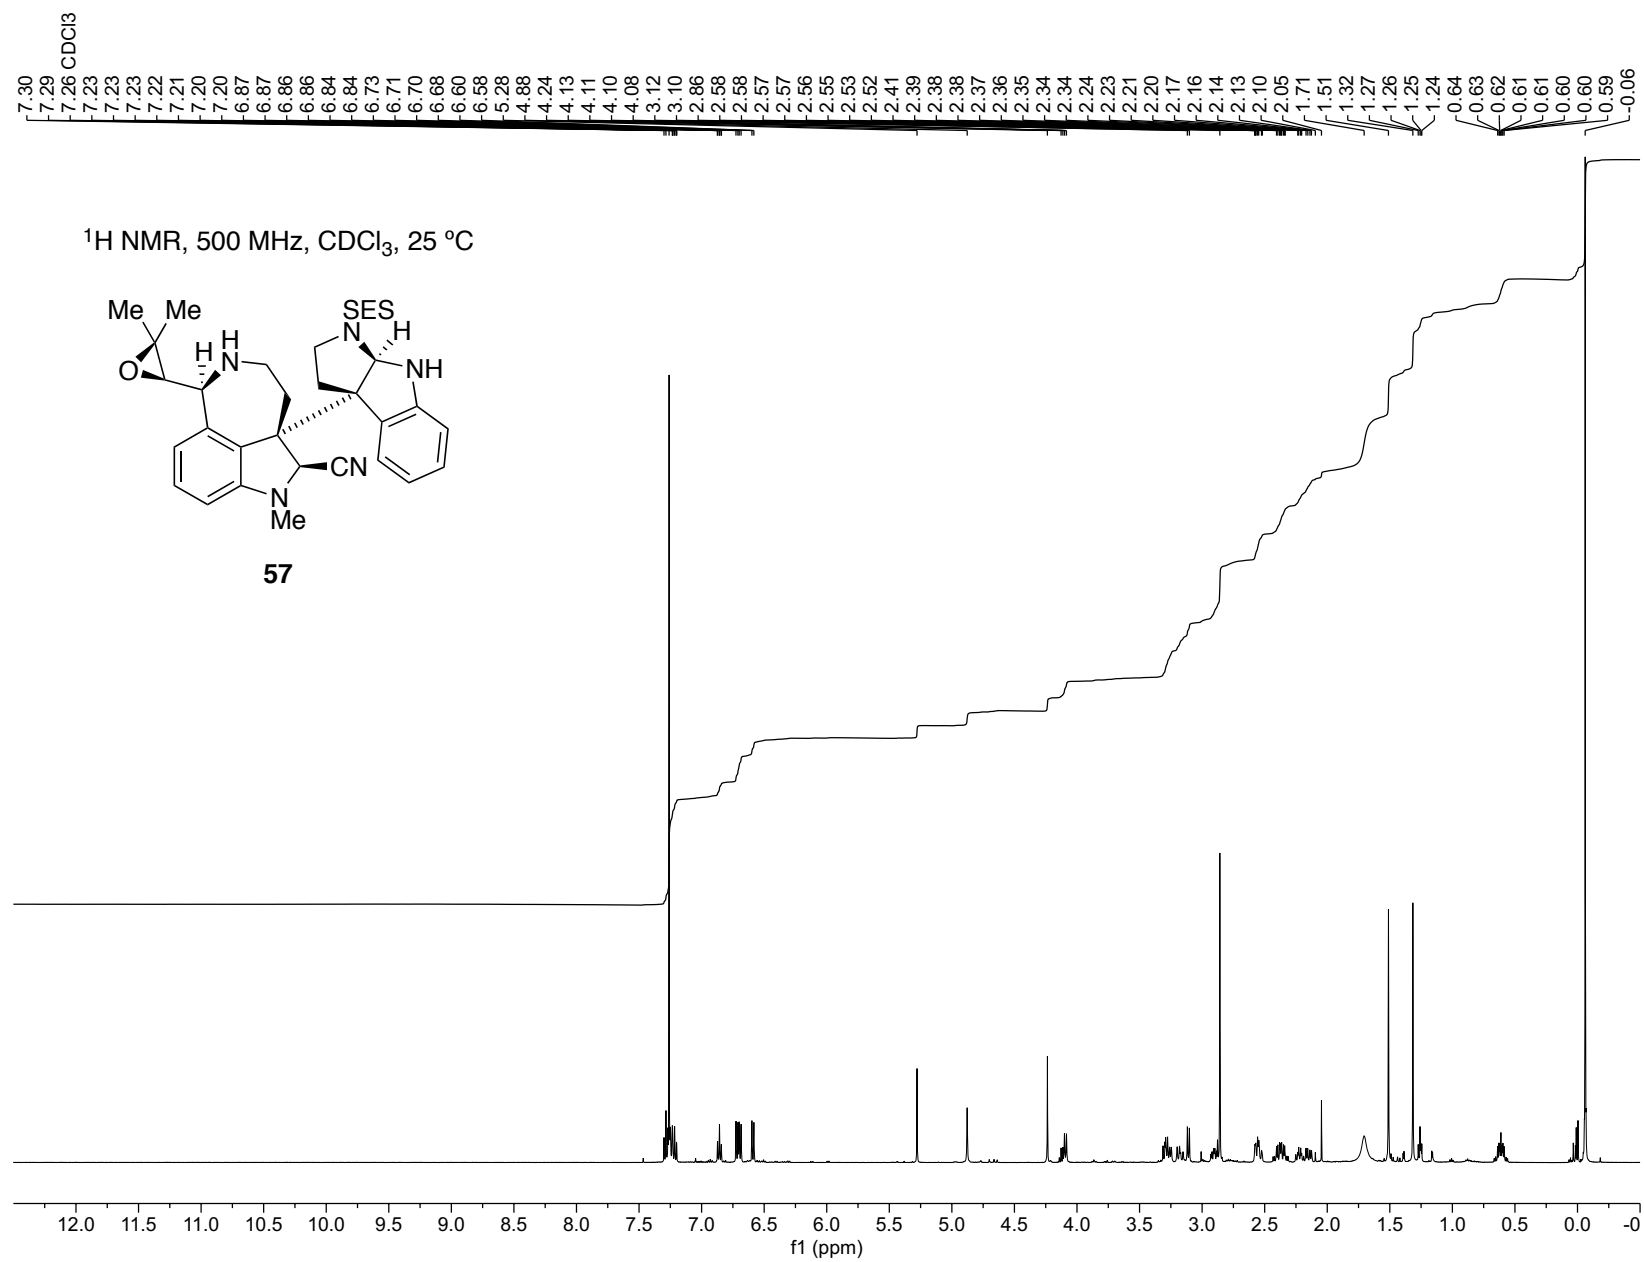



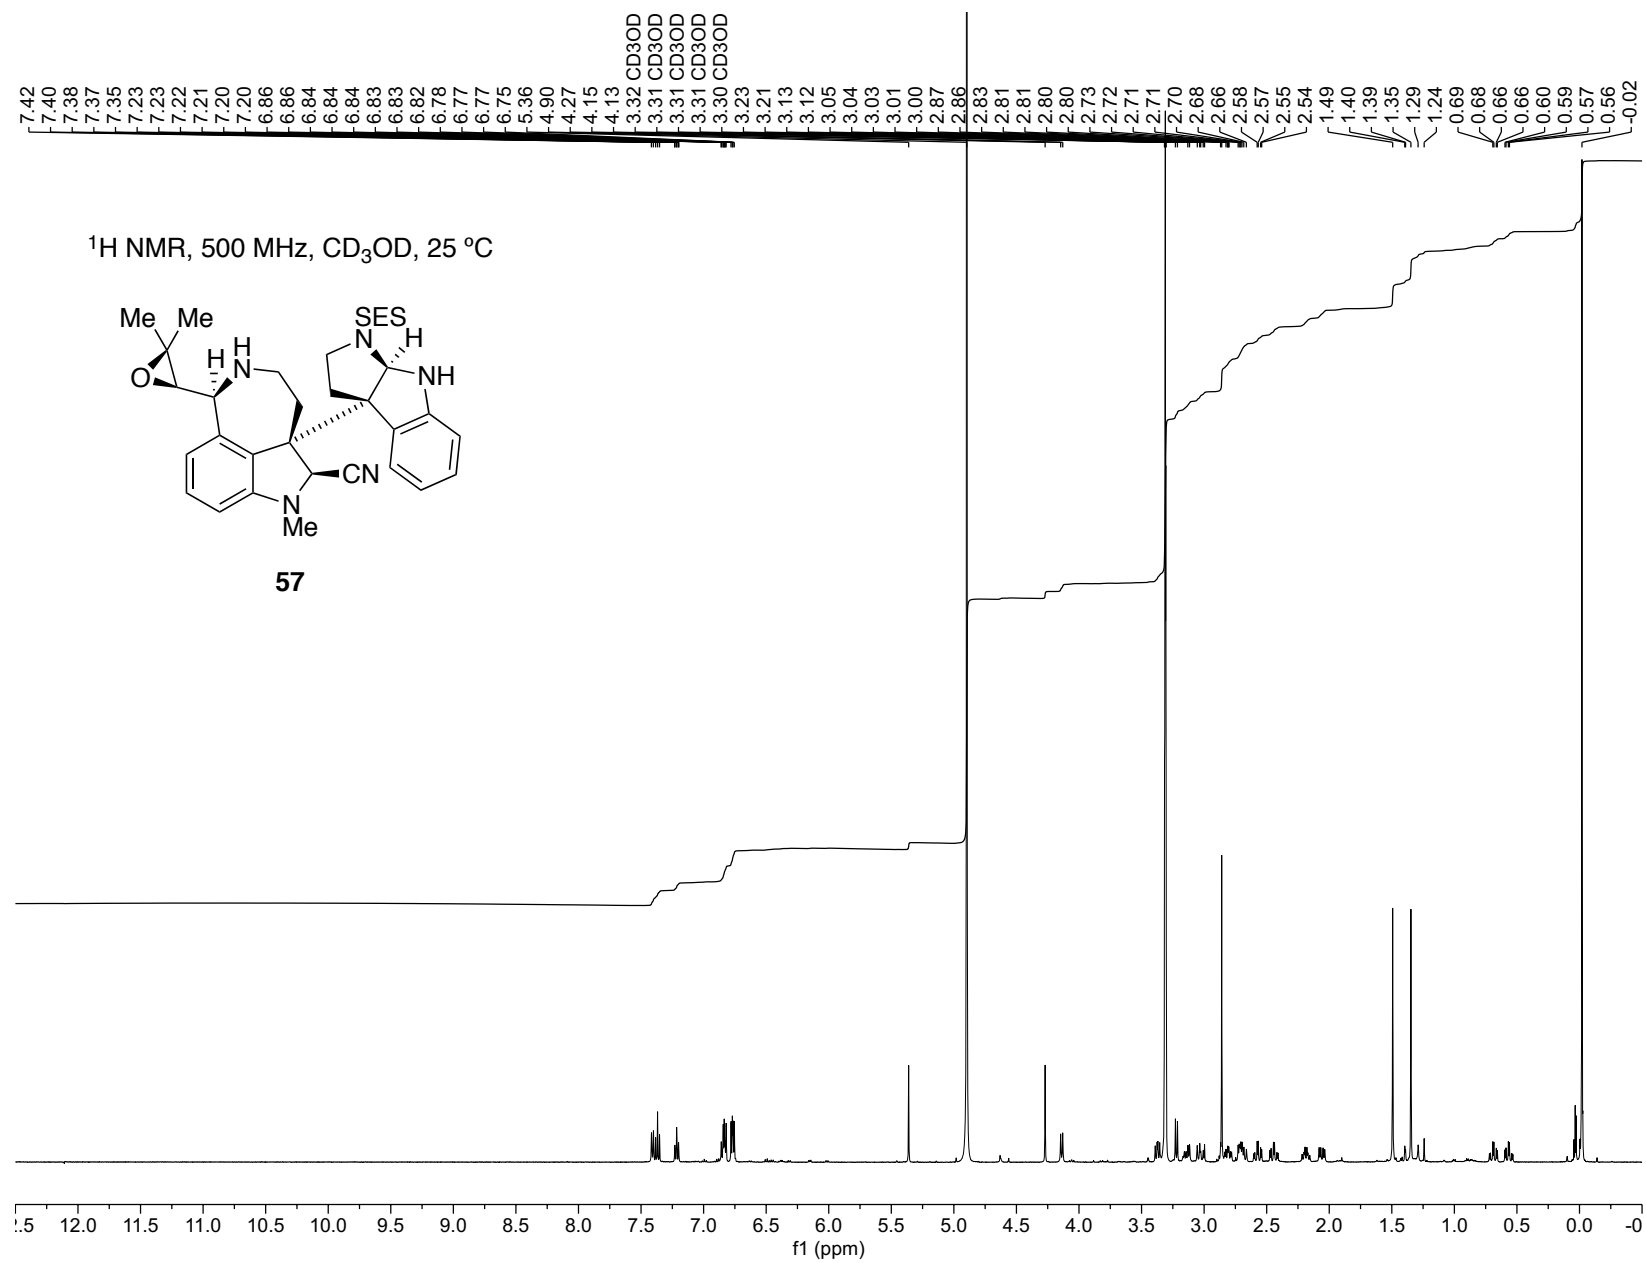

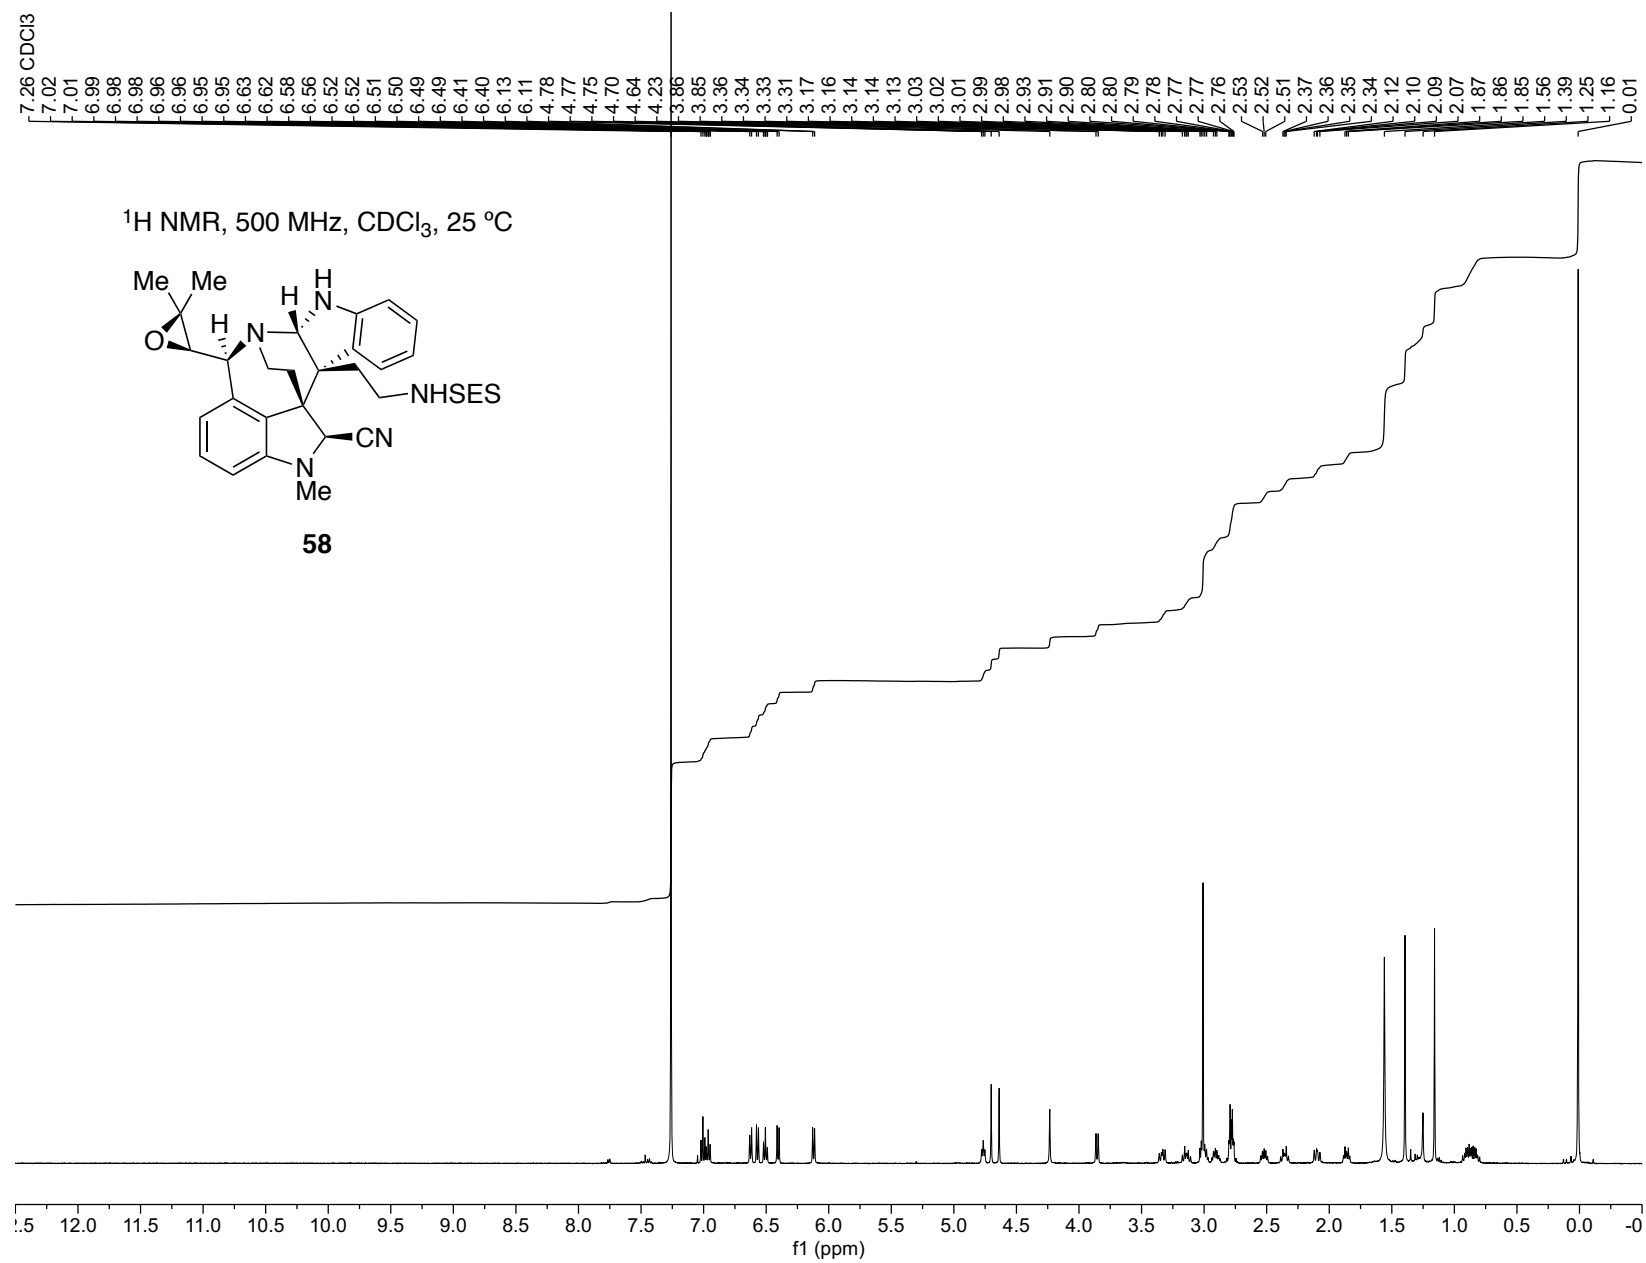

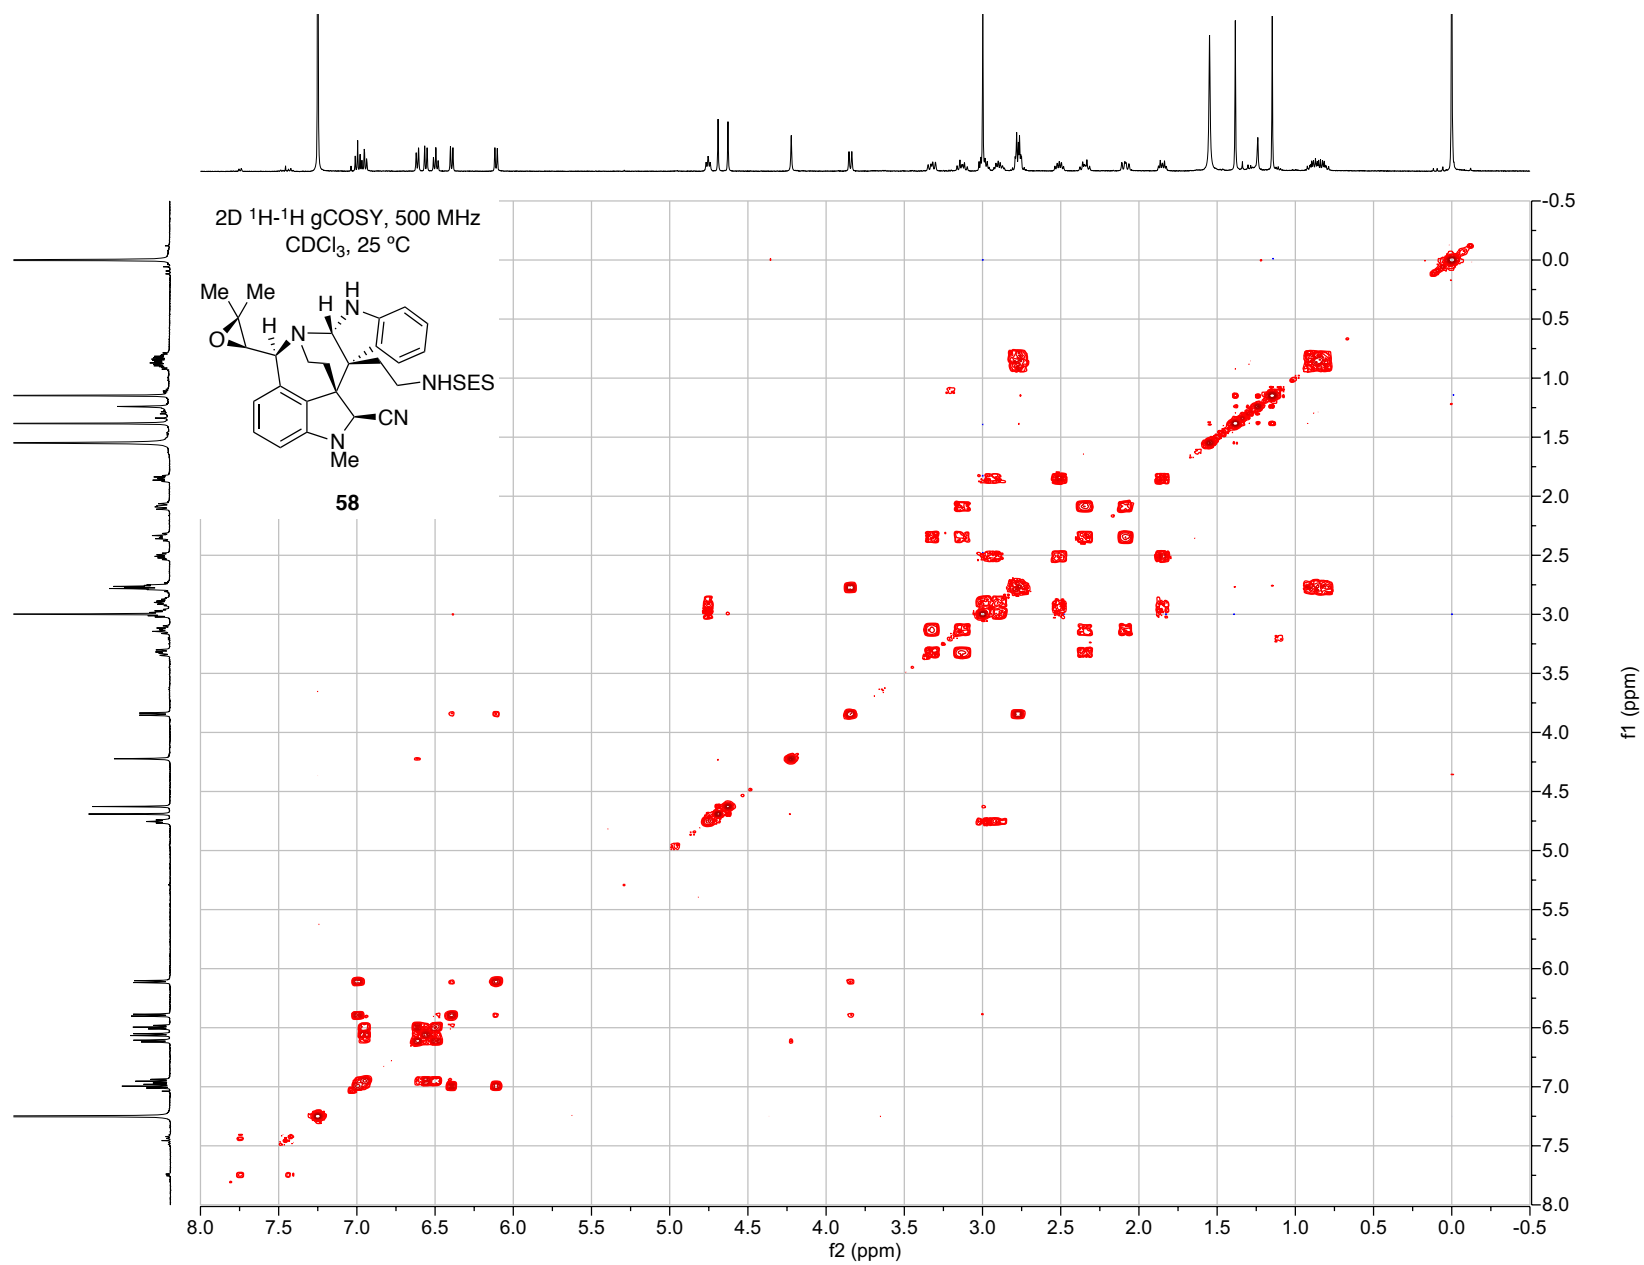

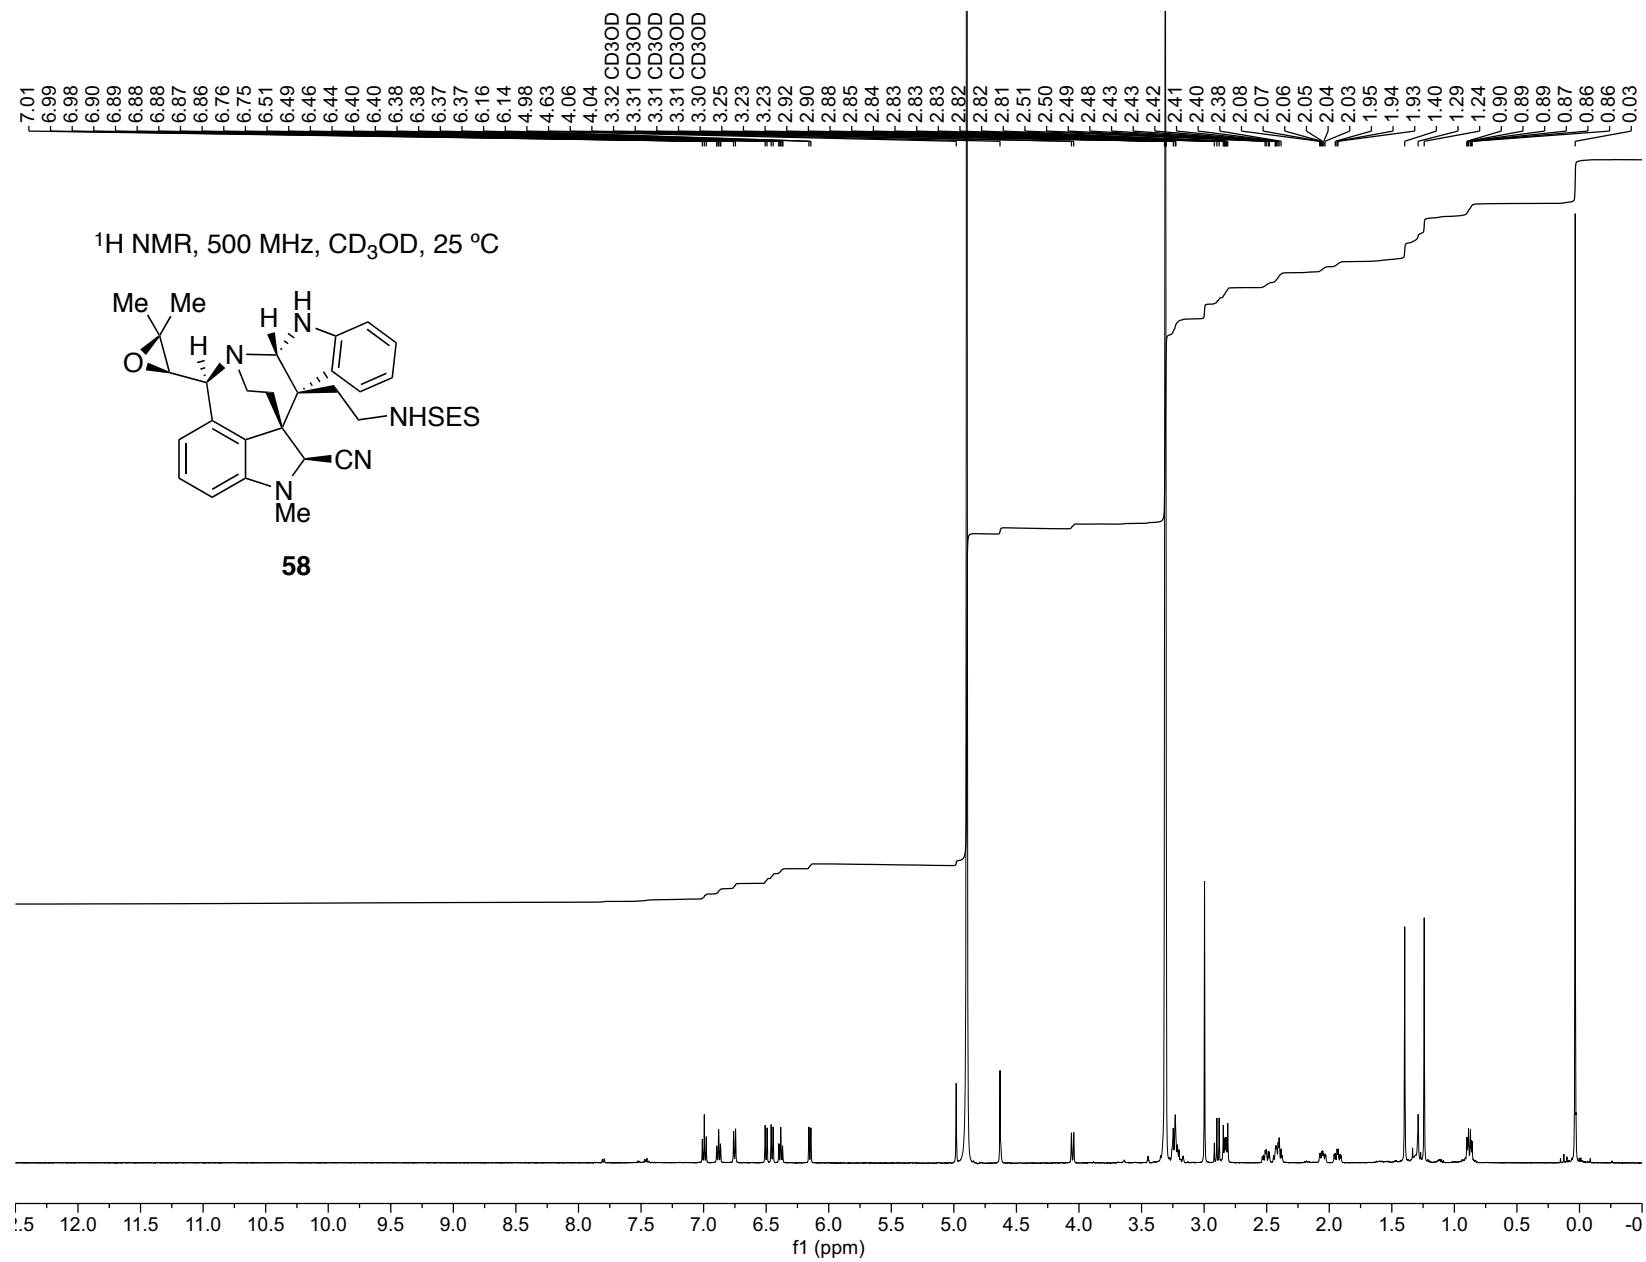





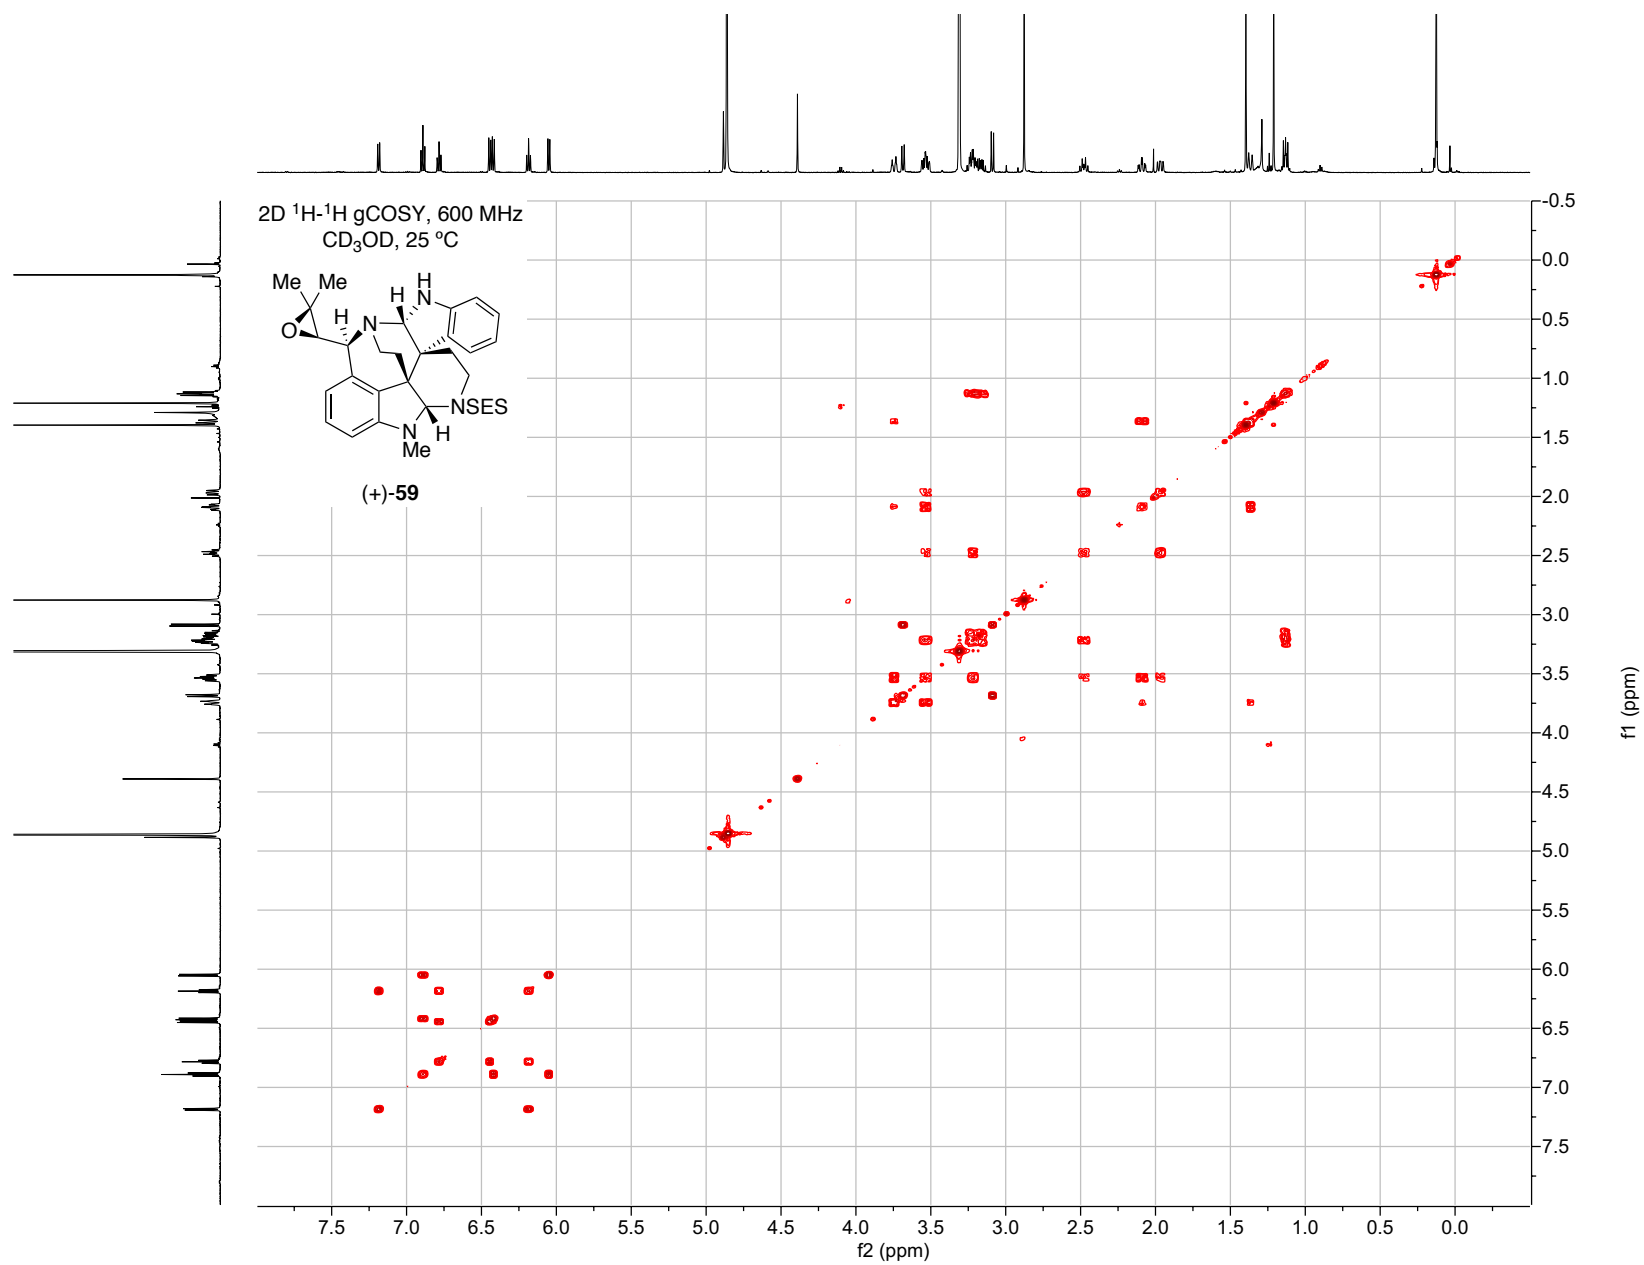

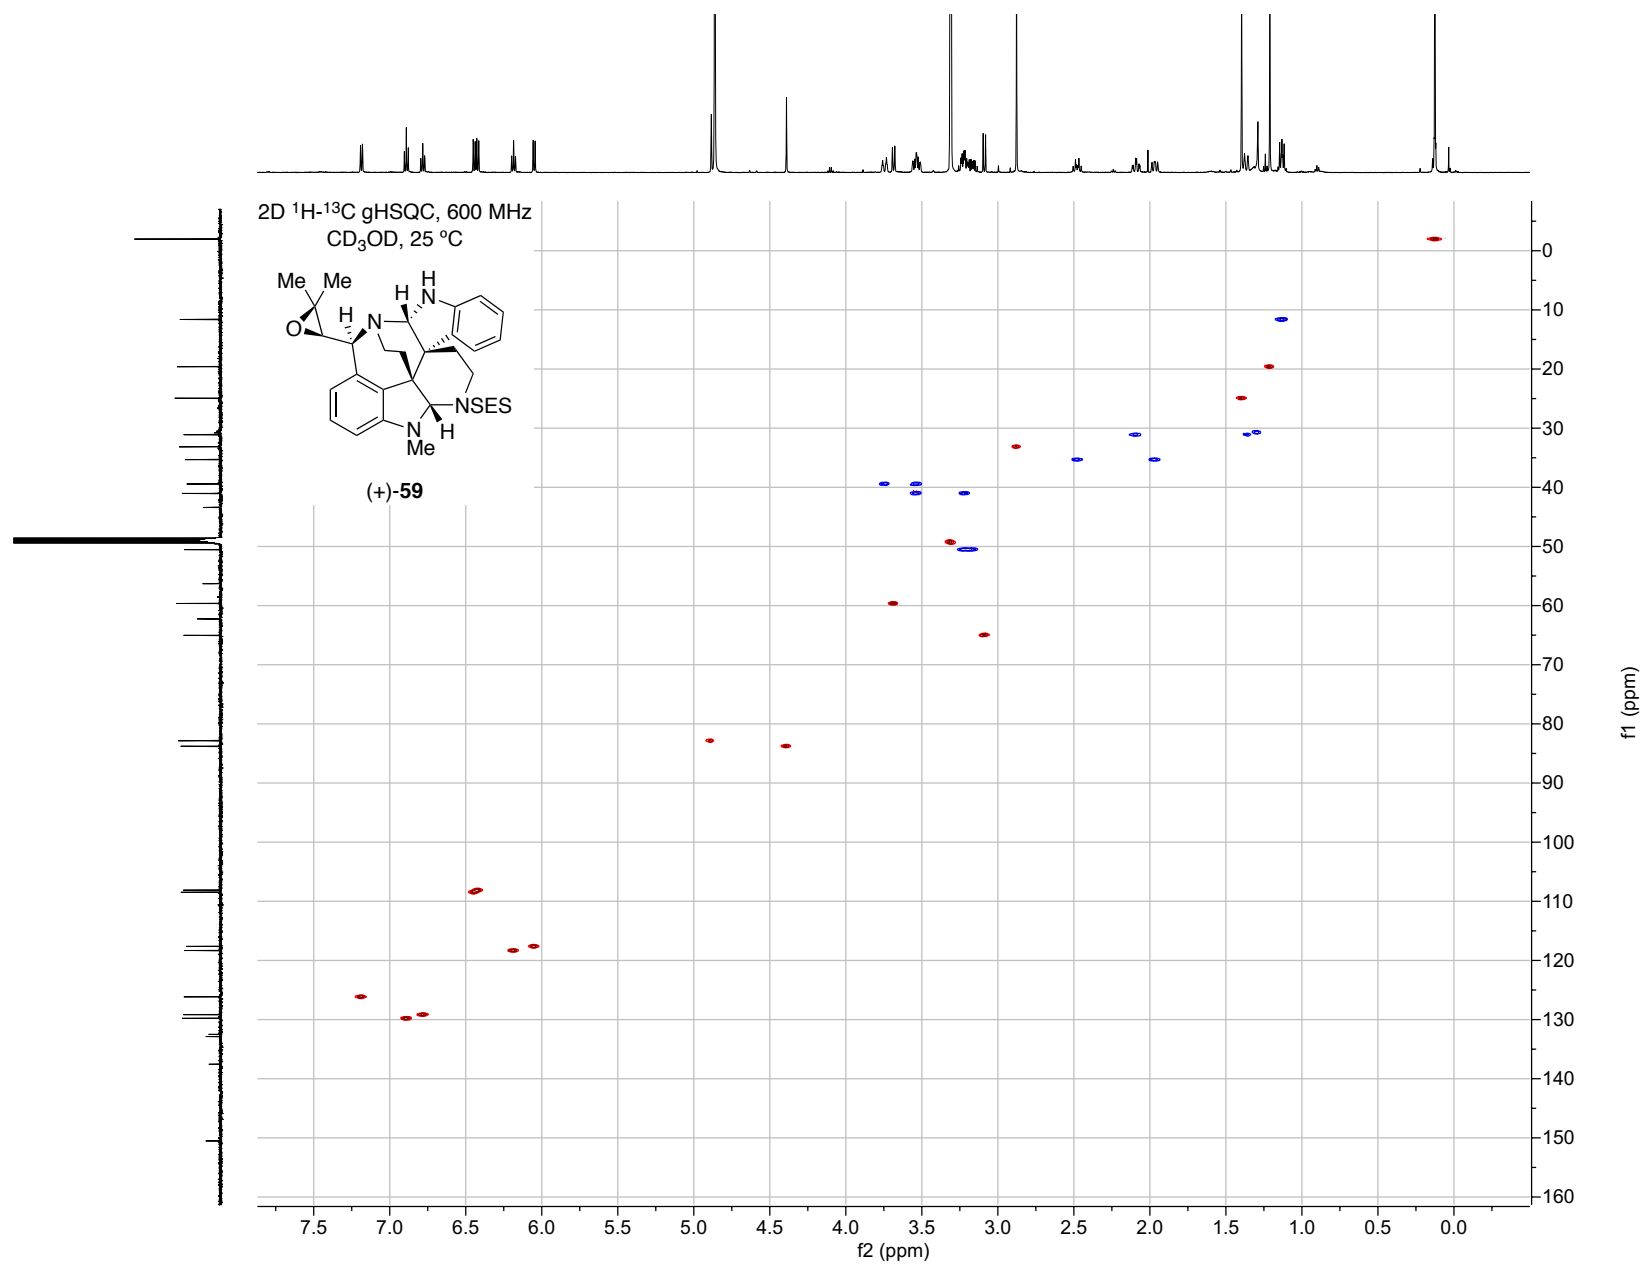

Supplement: ja9b07397_si_001.pdf [file ja9b07397_si_001.pdf]
